# Supplementary material for: The Potential Tumor-Suppressor DHRS7 Inversely Correlates with EGFR Expression in Prostate Cancer Cells and Tumor Samples
Source: MDPI journal article supplement (doi:10.3390/cancers14133074), 2022-06-23

Western blots related to Figure 2

Lanes from left to right: Panel (d): siCTRL 24h, siDHR7 24h, siCTRL 36h, siDHR7 36h, siCTRL 48h, siDHR7 48h.

EGFR and  $\gamma$ -Tubulin #1

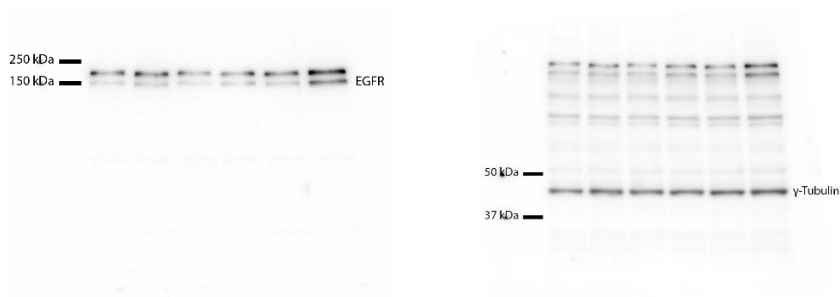

EGFR and  $\gamma$ -Tubulin #2

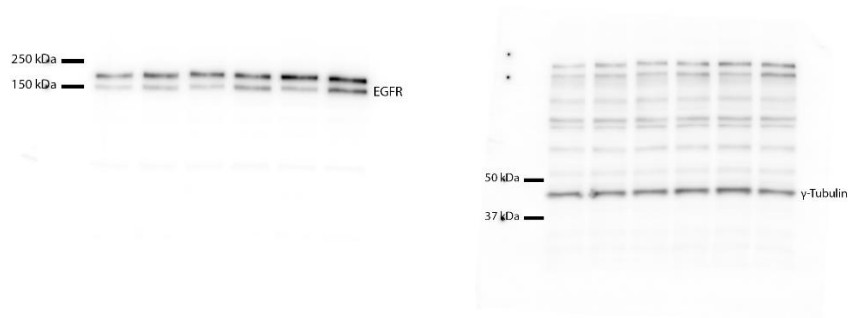

EGFR and  $\gamma$ -Tubulin #3

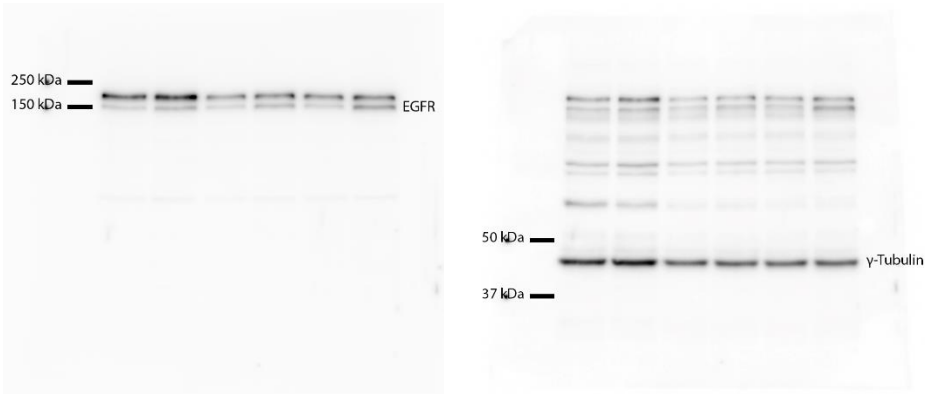

DHRS7, STAT3,  $\gamma$ -Tubulin #1

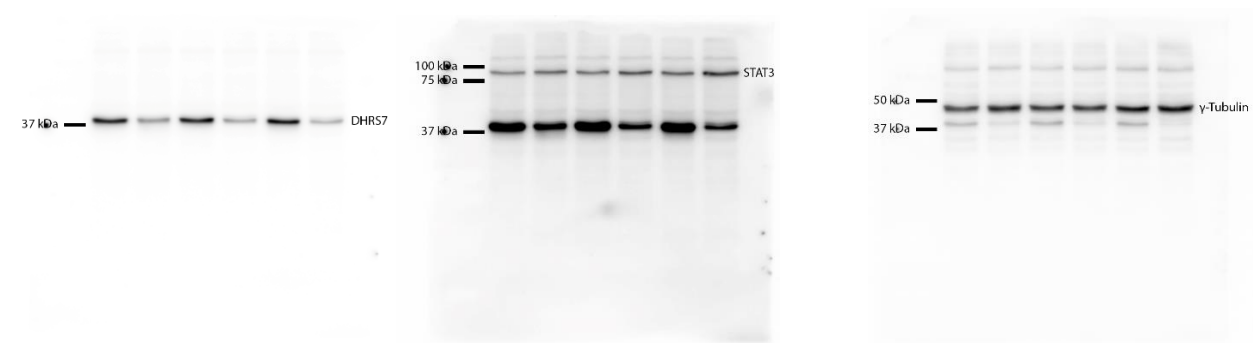

DHRS7, STAT3,  $\gamma$ -Tubulin #2

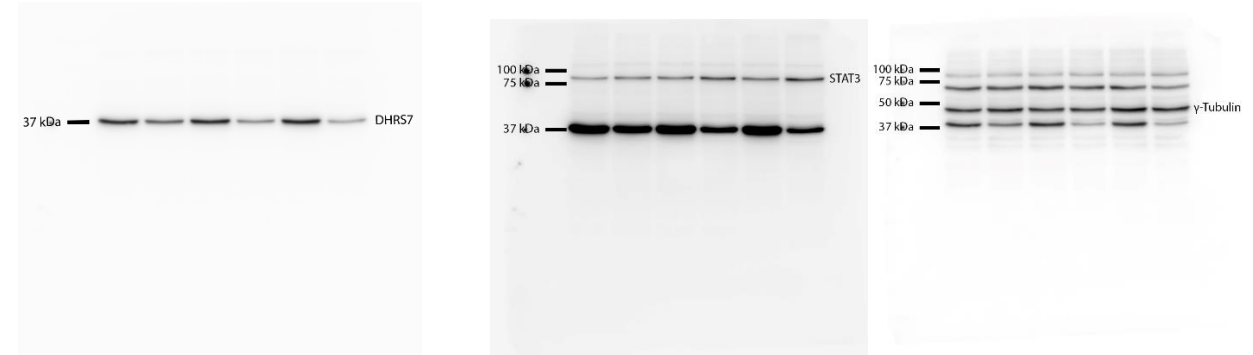

DHRS7, STAT3,  $\gamma$ -Tubulin #3

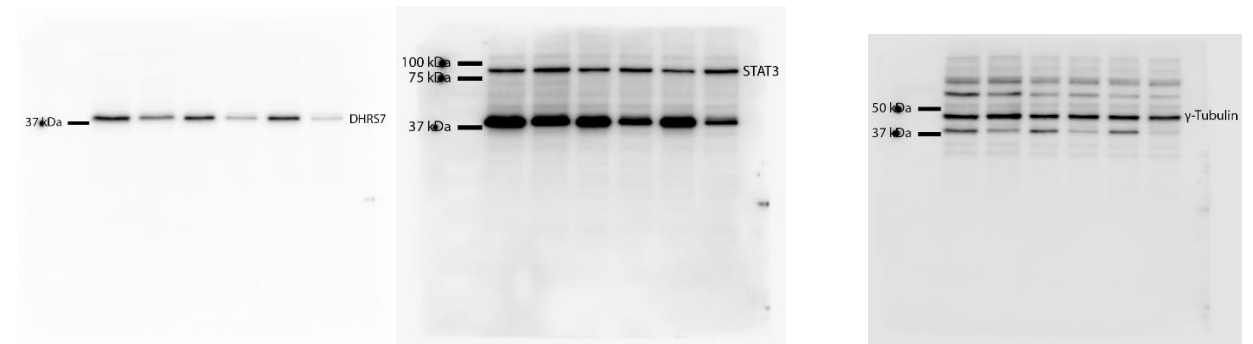

Lanes from left to right: Panel (e): Control, siRNA-1, siRNA-2, siRNA-3, siRNA-4  
EGFR and  $\gamma$ -Tubulin

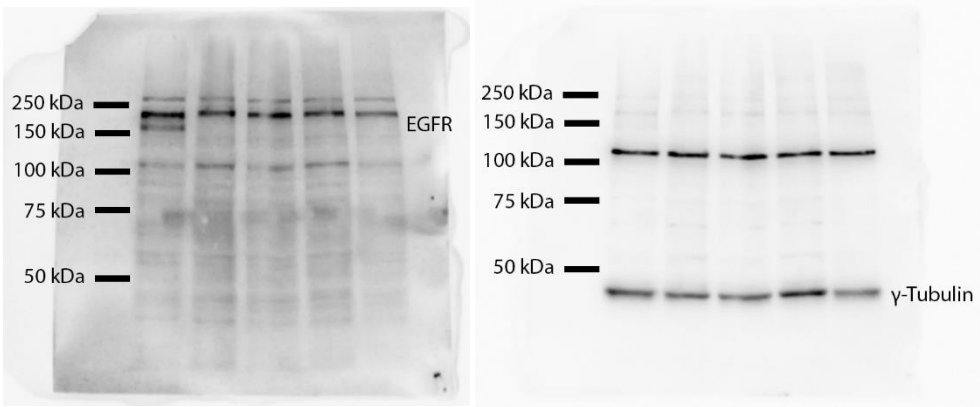

Western blots related to Figure 3 and Supplementary Figure 5

Lanes from left to right: LNCaP samples 1-3, PC-3 samples 1-3, DU145 samples 1-3.

EGFR, AR and  $\gamma$ -Tubulin

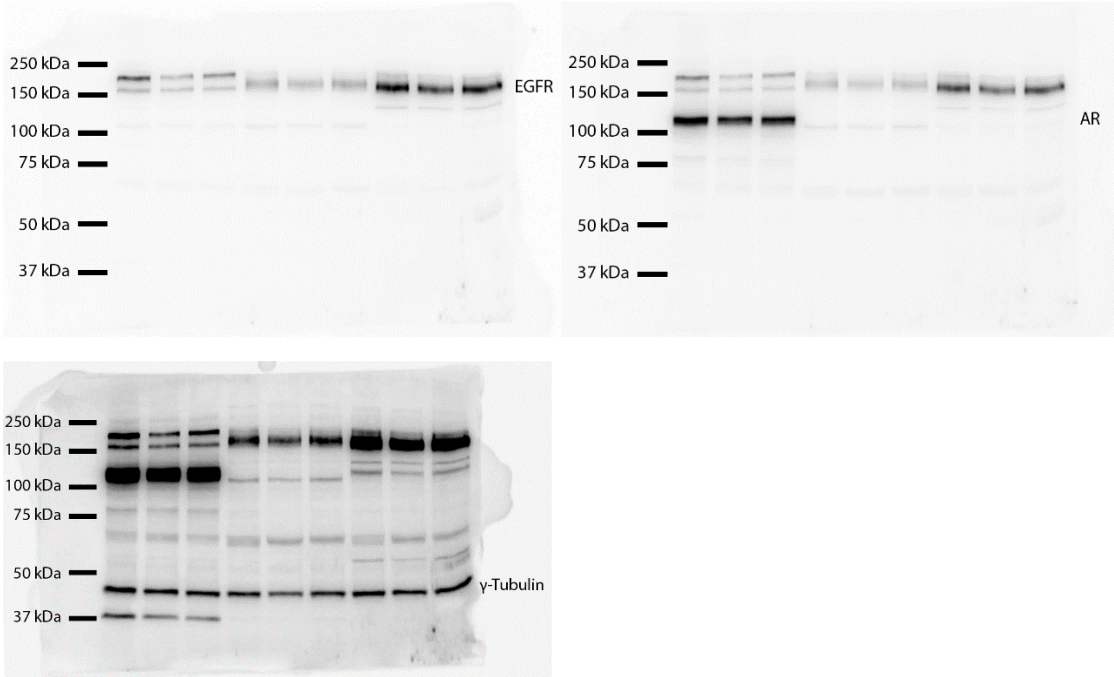

DHRS7 and  $\gamma$ -Tubulin

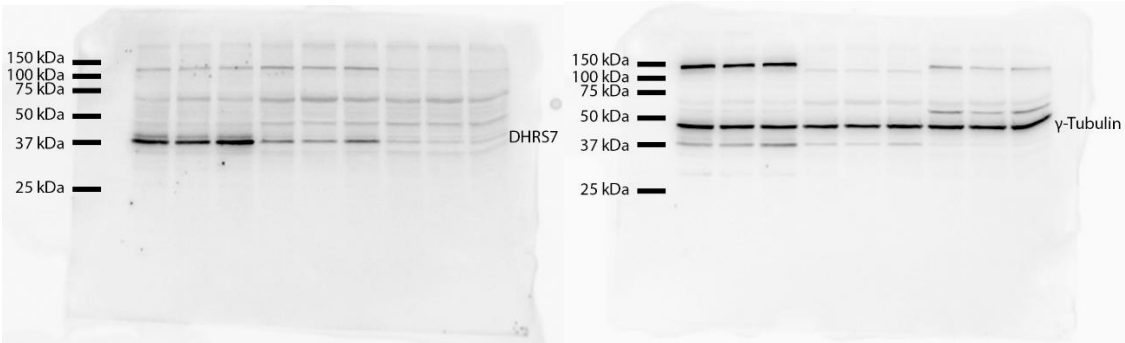

STAT3, AKT,  $\gamma$ -Tubulin and ERK

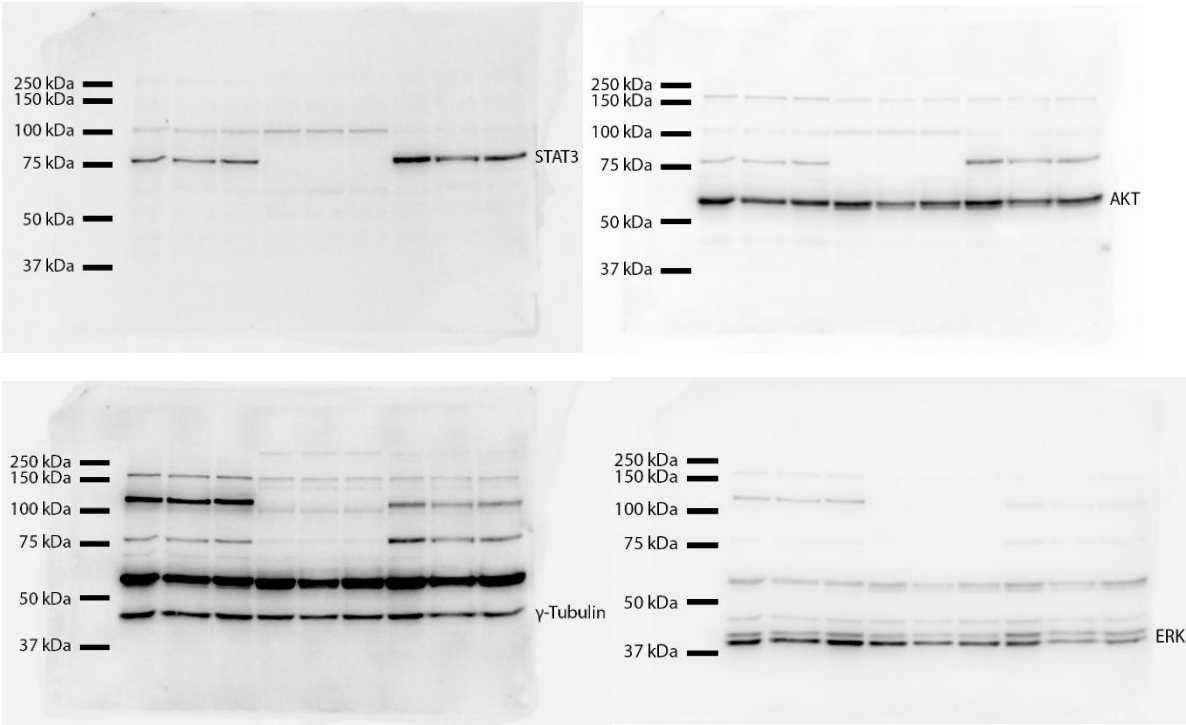

Western blots related to Figure 4

Lanes from left to right: PC-3 siCTRL#1 and siDHR7#1, PC-3 siCTRL#2 and siDHR7#2, PC-3 siCTRL#3 and siDHR7#3

EGFR and  $\gamma$ -Tubulin

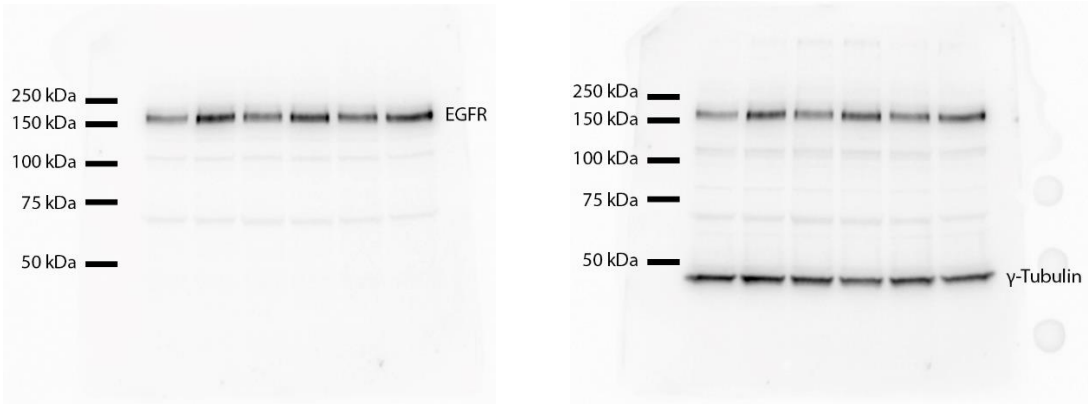

DHR7 and  $\gamma$ -Tubulin

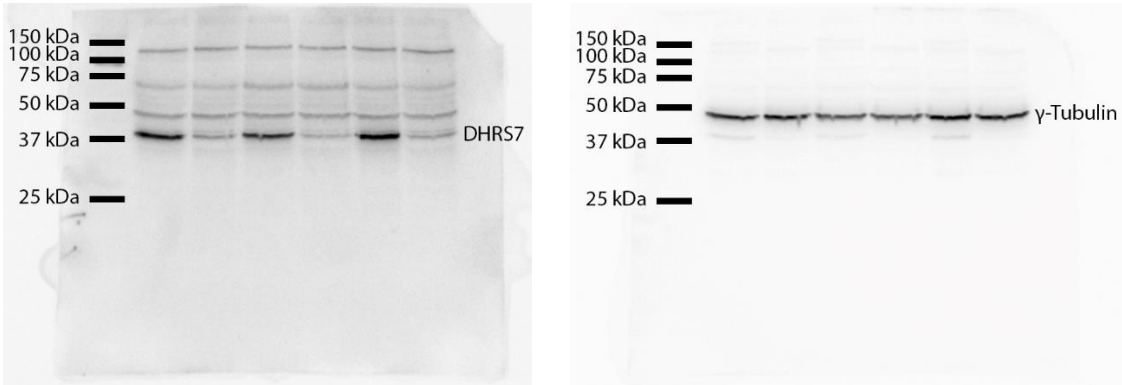

Lanes from left to right: DU145 siCTRL#1 and siDHR7#1, DU145 siCTRL#2 and siDHR7#2, DU145 siCTRL#3 and siDHR7#3

EGFR and  $\gamma$ -Tubulin

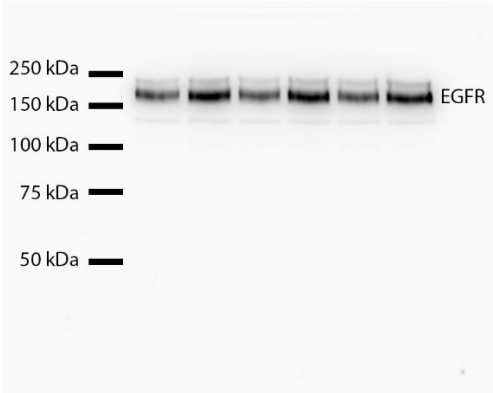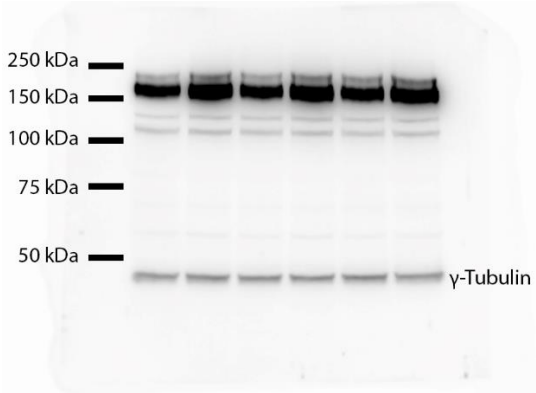

STAT3 and  $\gamma$ -Tubulin

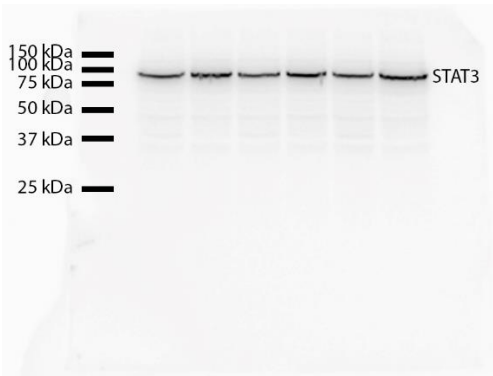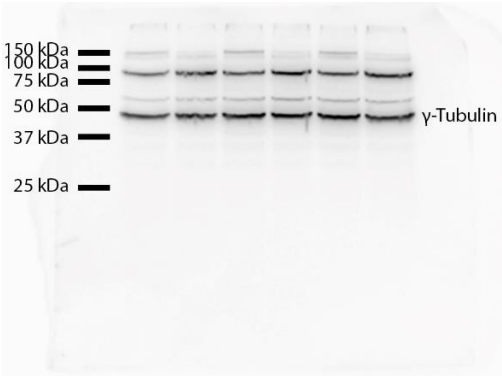

DHR7 and  $\gamma$ -Tubulin

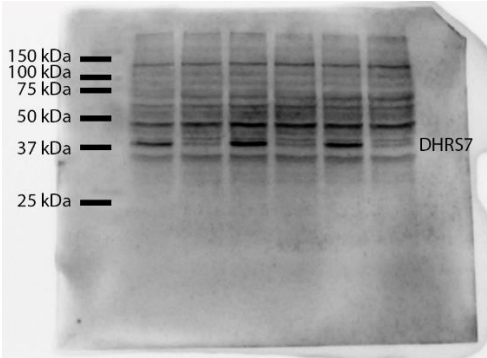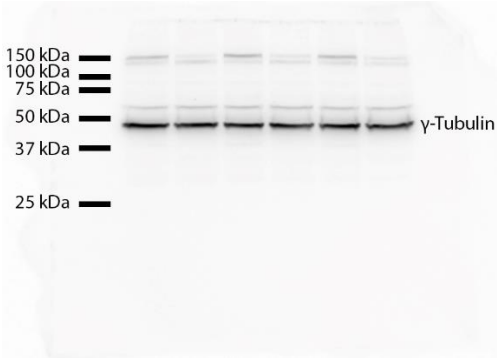

Western blots related to Figure 5

Lanes from left to right: LNCaP siCTRL#1 and siEGFR#1, LNCaP siCTRL#2 and siEGFR#2, LNCaP siCTRL#3 and siEGFR#3

STAT3, EGFR  $\gamma$ -Tubulin and AR

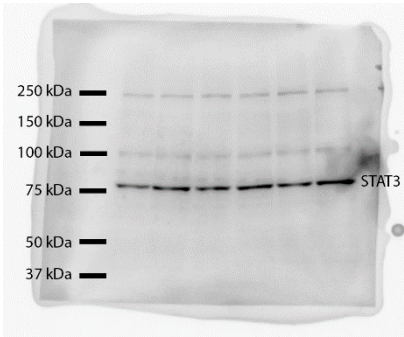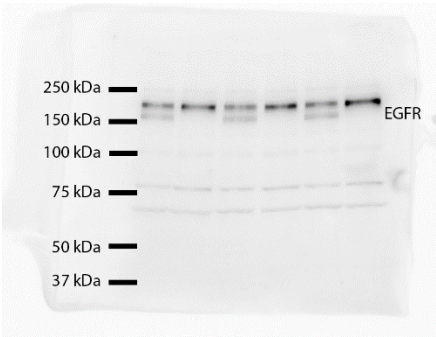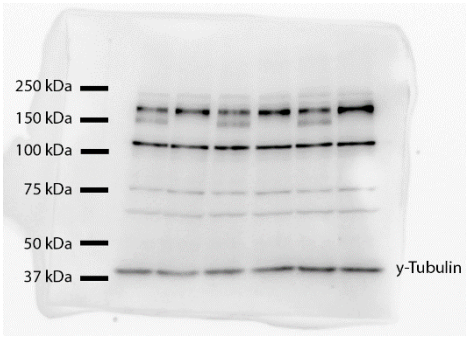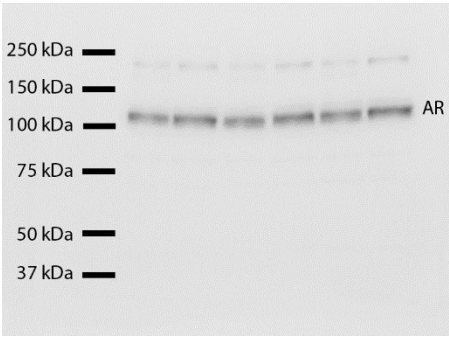

DHRS7 and  $\gamma$ -Tubulin

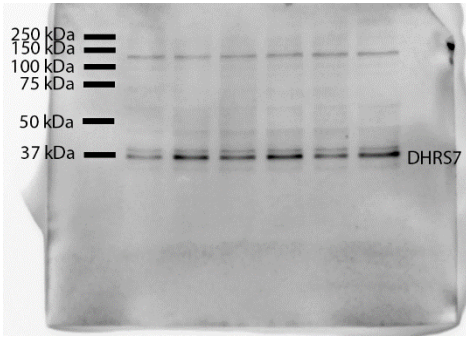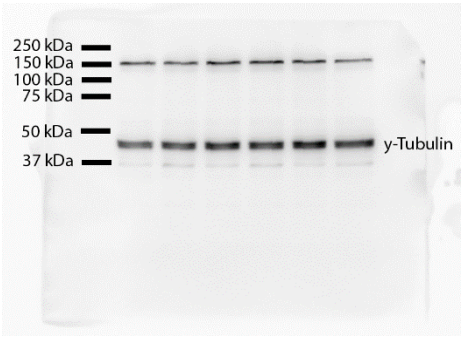



Lanes from left to right: PC-3 siCTRL#1 and siEGFR#1, PC-3 siCTRL#2 and siEGFR#2, PC-3 siCTRL#3 and siEGFR#3

EGFR and  $\gamma$ -Tubulin

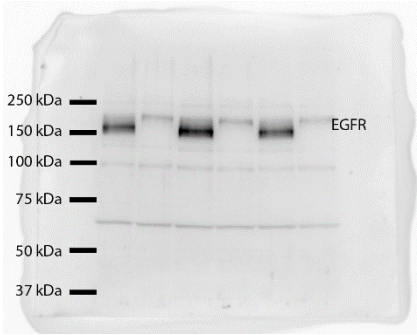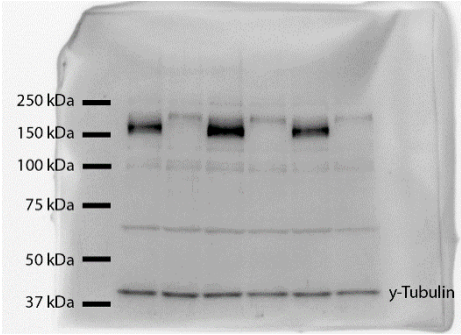

DHRS7 and  $\gamma$ -Tubulin

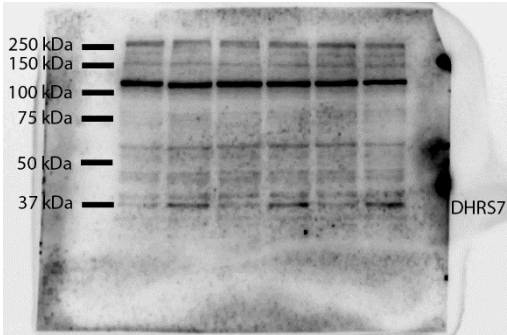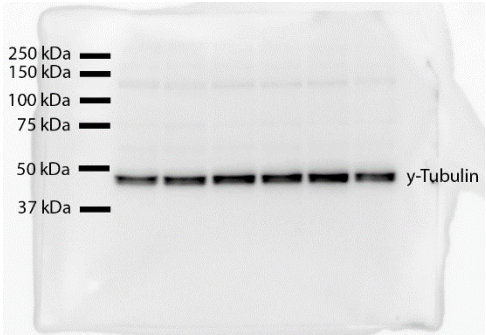



Lanes from left to right: DU145 siCTRL#1 and siEGFR#1, DU145 siCTRL#2 and siEGFR#2, DU145 siCTRL#3 and siEGFR#3

EGFR, STAT3 and  $\gamma$ -Tubulin

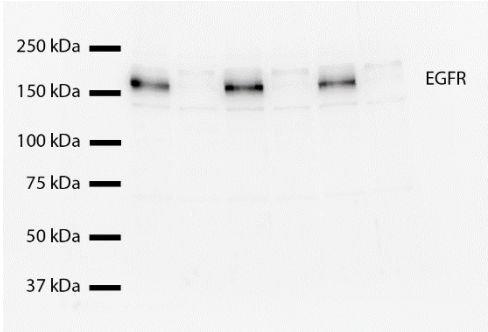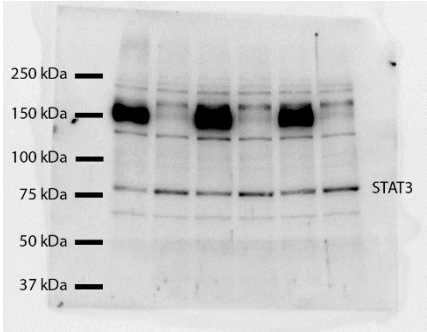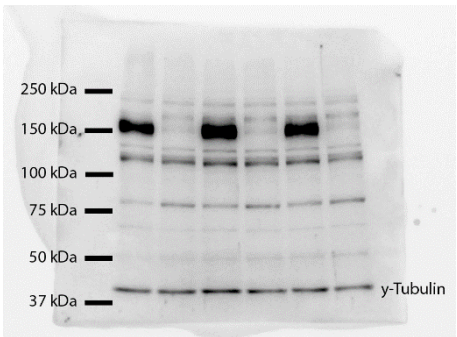

DHRS7 and  $\gamma$ -Tubulin

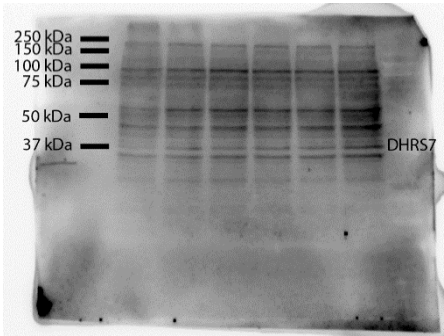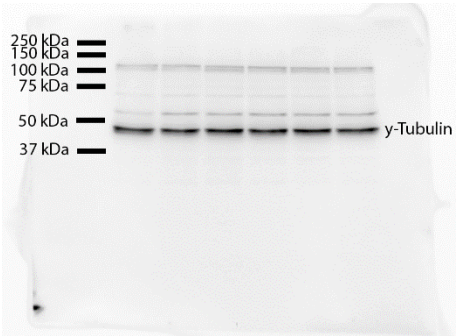

Western blots related to Figure 6 and Supplementary Figure 4: LNCaP samples

Lanes from left to right: siCTRL -, siDHRS7 -, siCTRL EGF 1min, siDHRS7 EGF 1min, siCTRL EGF 5min, siDHRS7 EGF 5min.

DHRS7 and  $\gamma$ -Tubulin #1

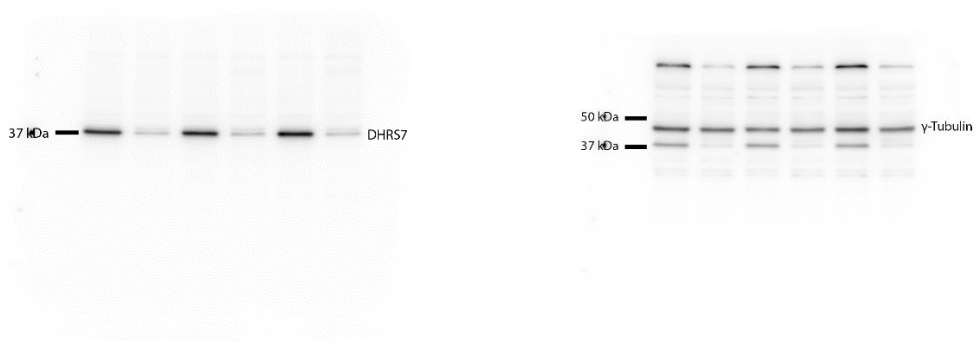

DHRS7 and  $\gamma$ -Tubulin #2

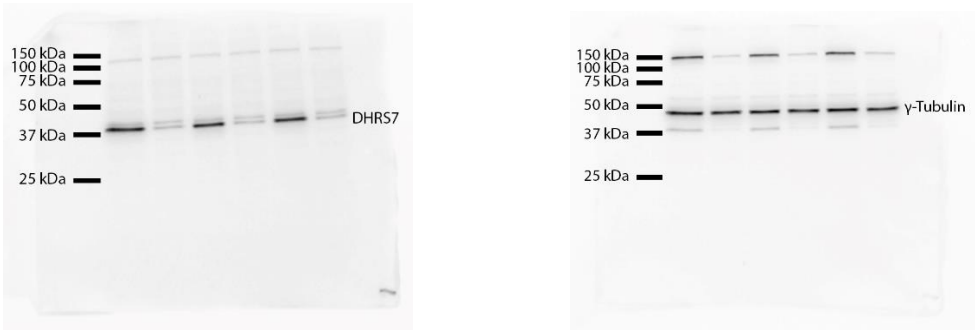

DHRS7 and  $\gamma$ -Tubulin #3

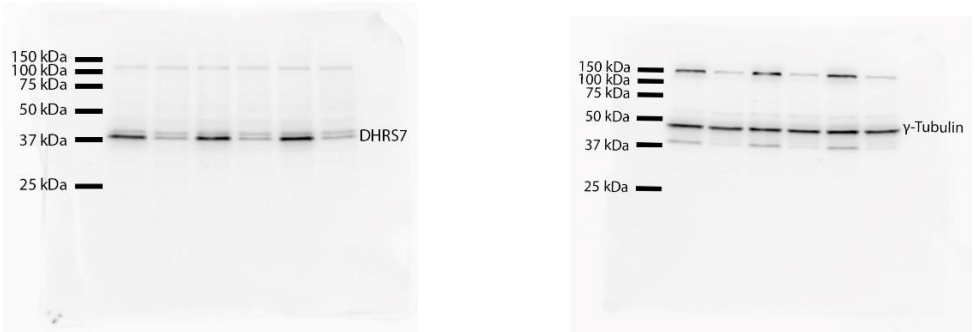

EGFR, STAT3,  $\gamma$ -Tubulin, ERK and AKT #1

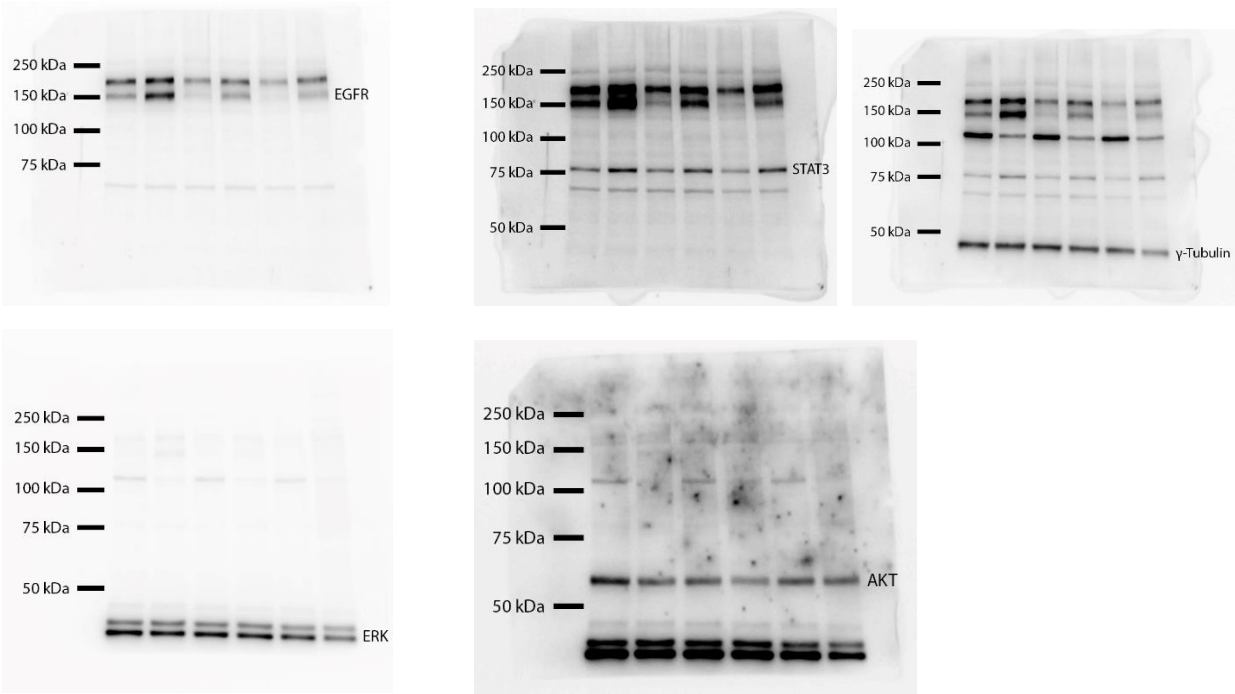

EGFR, STAT3,  $\gamma$ -Tubulin, ERK and AKT #2

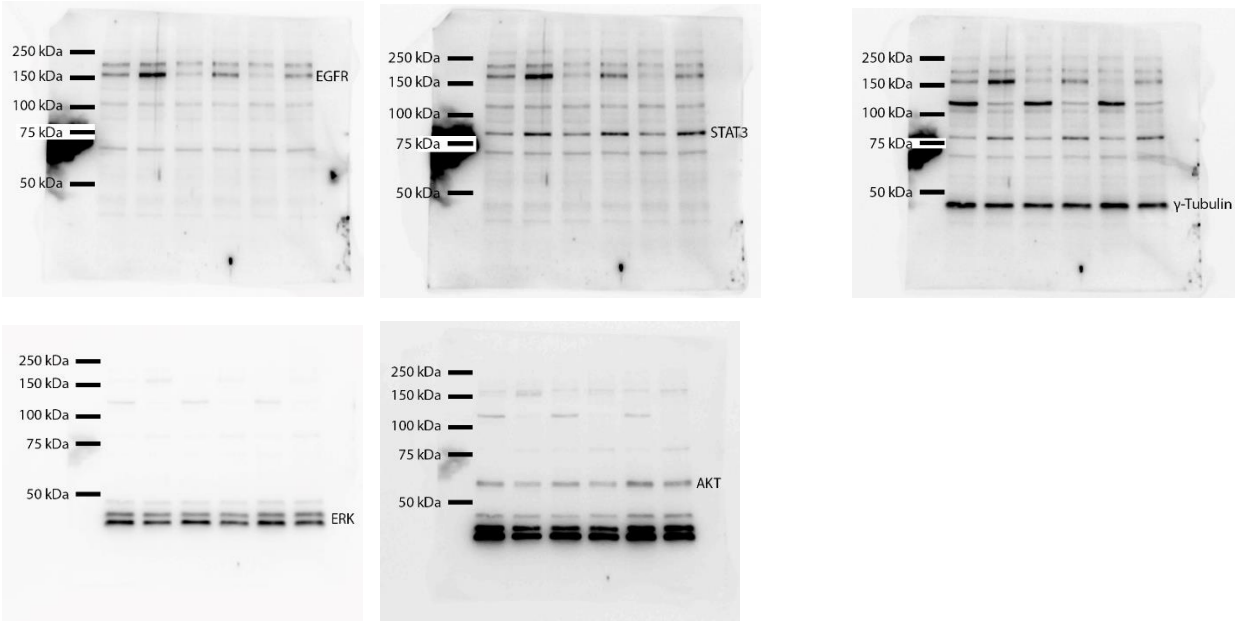

EGFR, STAT3, γ-Tubulin, ERK and AKT #3

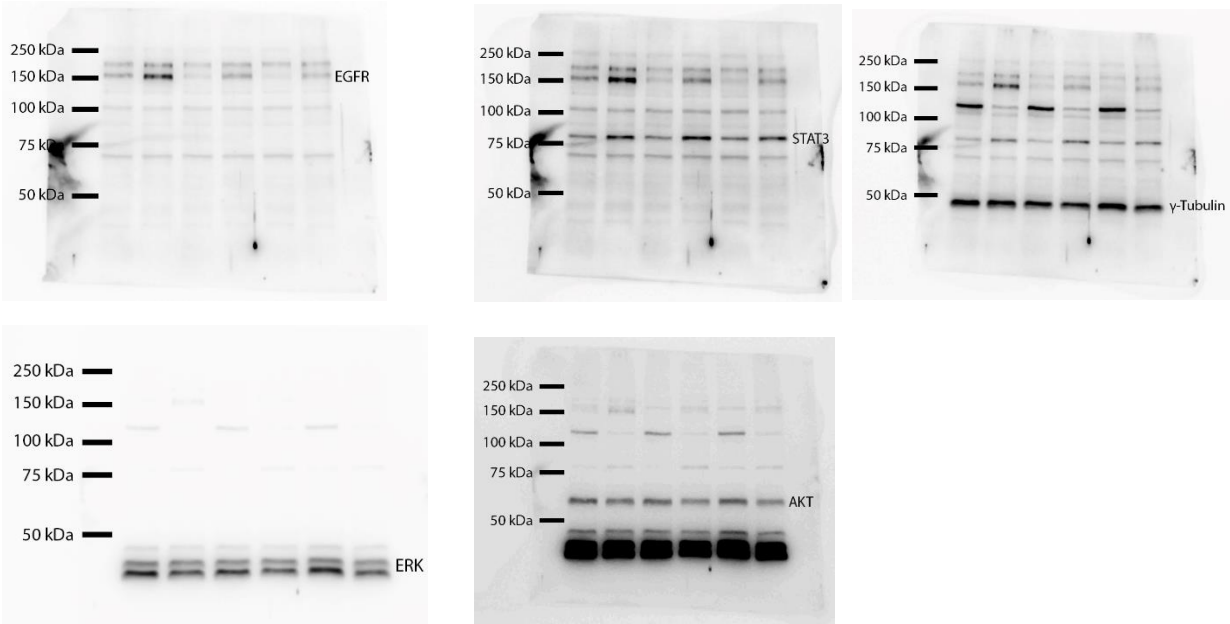

pEGFR, pSTAT3, γ-Tubulin, pERK and pAKT(S473) #1

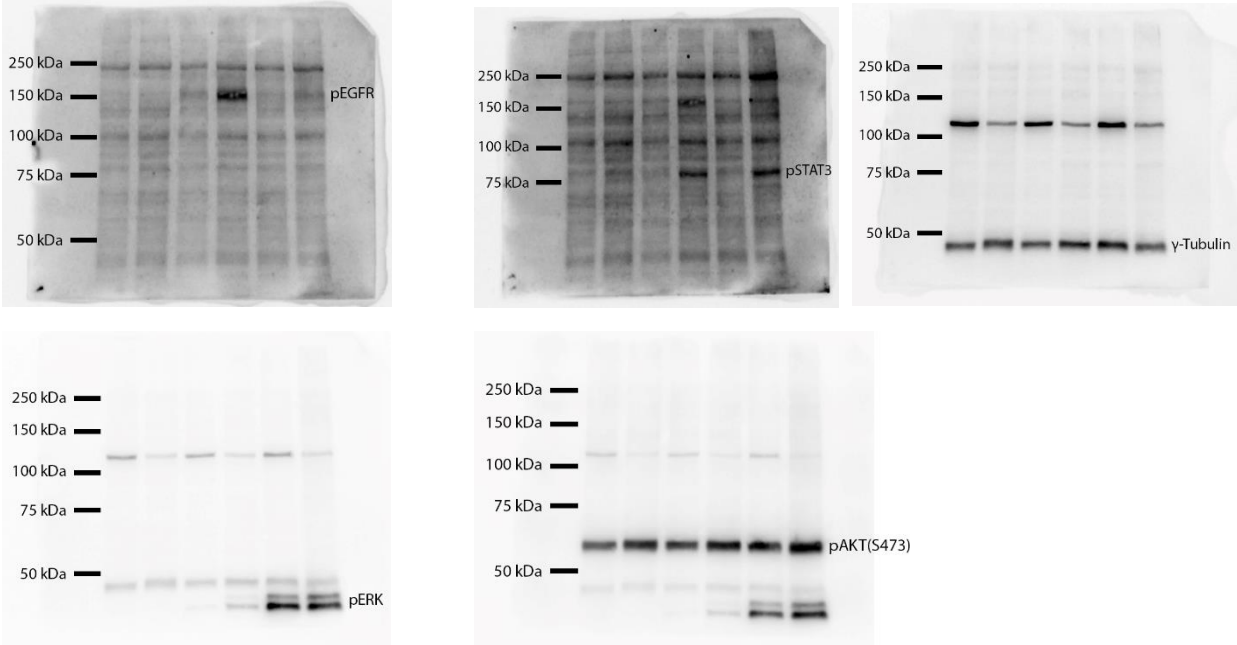

pAKT(T308) and  $\gamma$ -Tubulin #1

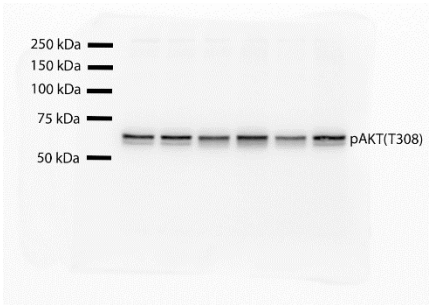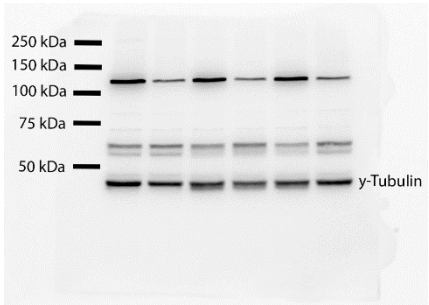

pEGFR, pSTAT3,  $\gamma$ -Tubulin, pERK and pAKT(S473) #2

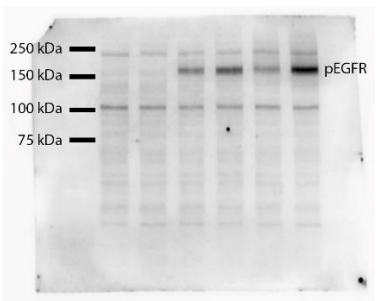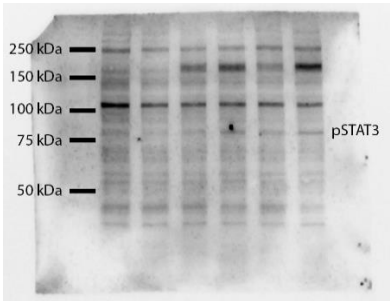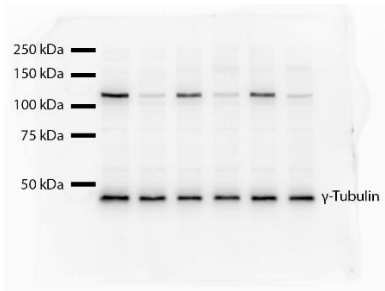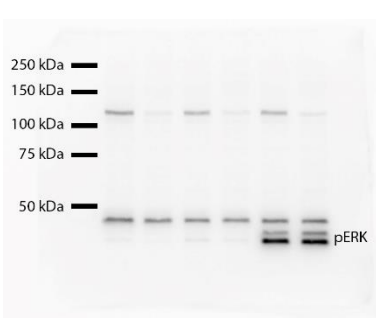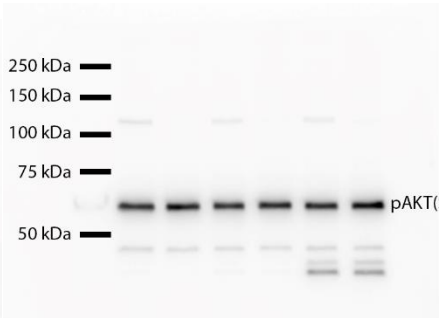

pAKT(T308) and  $\gamma$ -Tubulin #2

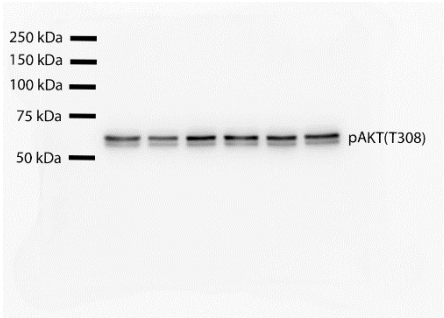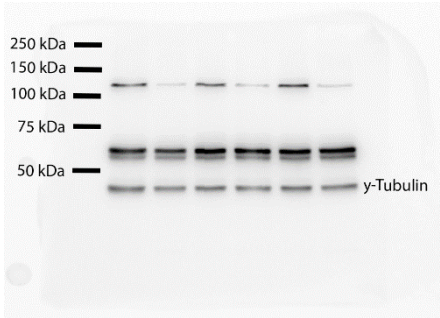

pEGFR, pSTAT3,  $\gamma$ -Tubulin, pERK and pAKT(S473) #3

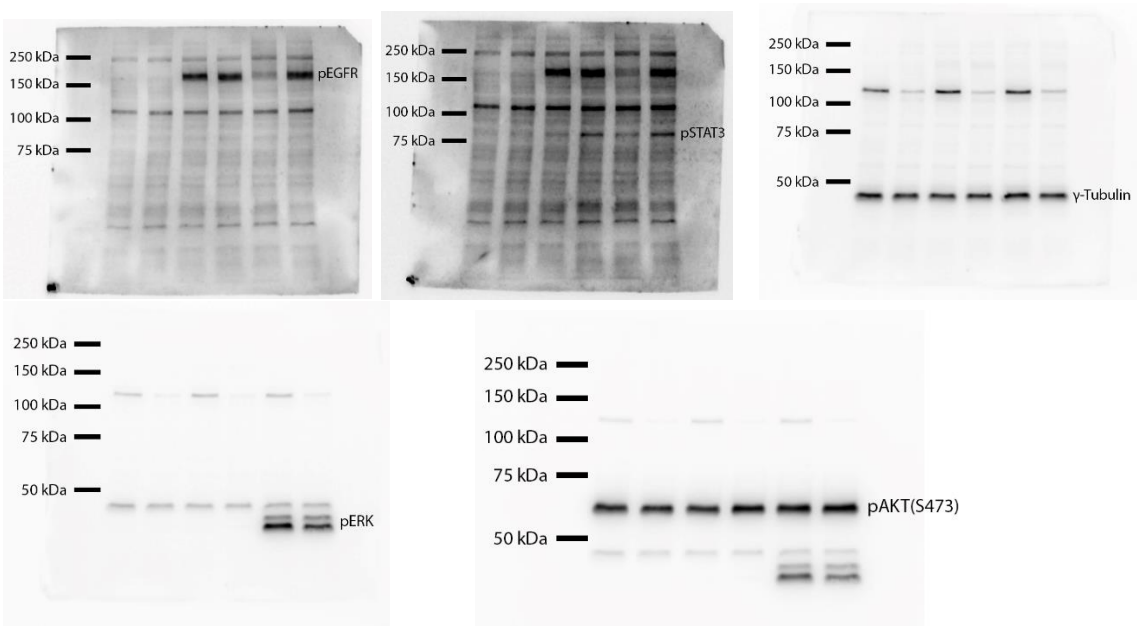

pAKT(T308) and  $\gamma$ -Tubulin #3

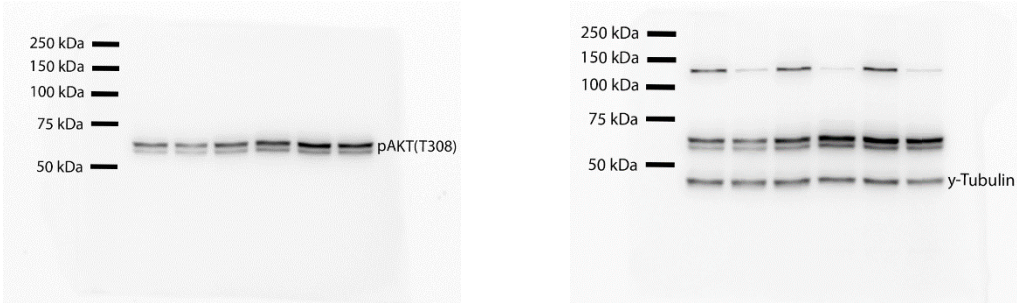



Western blots related to Figure 6 and Supplementary Figure 4: PC-3 samples

Lanes from left to right: siCTRL -, siDHRS7 -, siCTRL EGF 1min, siDHRS7 EGF 1min, siCTRL EGF 5min, siDHRS7 EGF 5min.

DHRS7 and  $\gamma$ -Tubulin #1

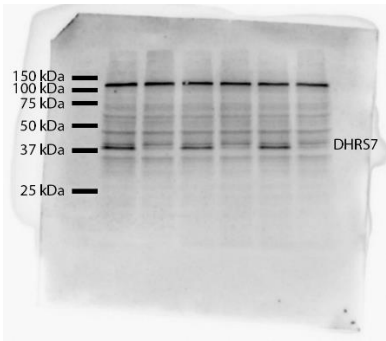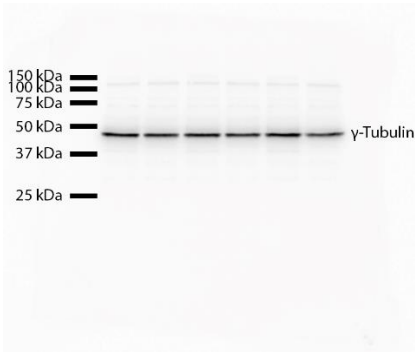

DHRS7 and  $\gamma$ -Tubulin #2

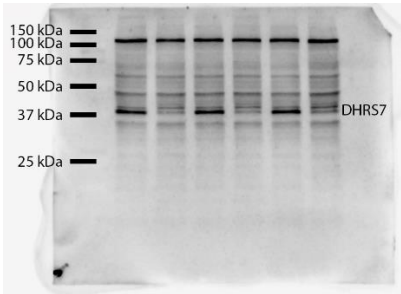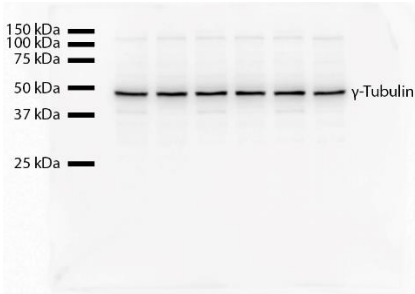

DHRS7 and  $\gamma$ -Tubulin #3

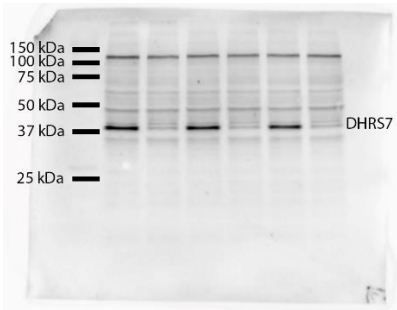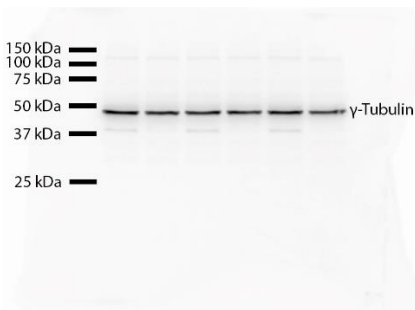



EGFR,  $\gamma$ -Tubulin, ERK and AKT #1

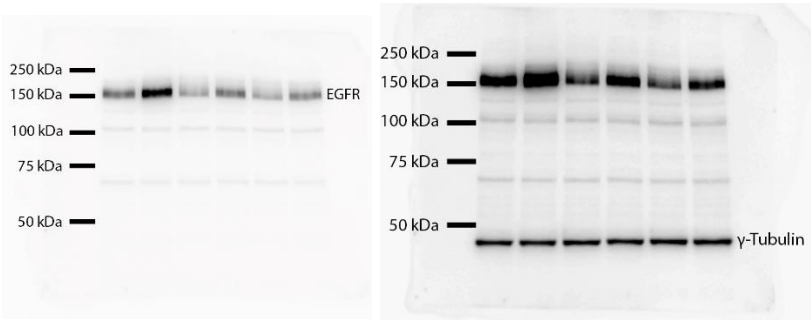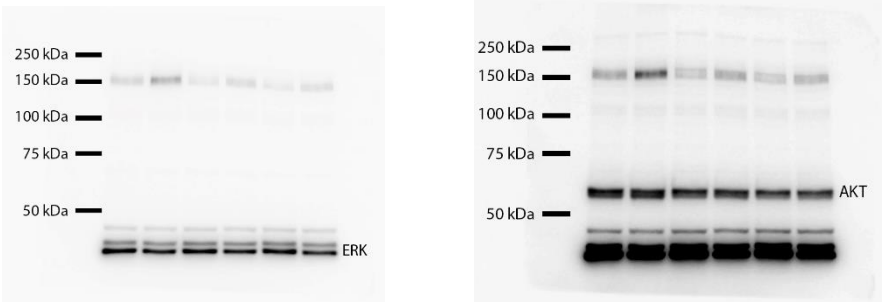

EGFR,  $\gamma$ -Tubulin, ERK and AKT #2

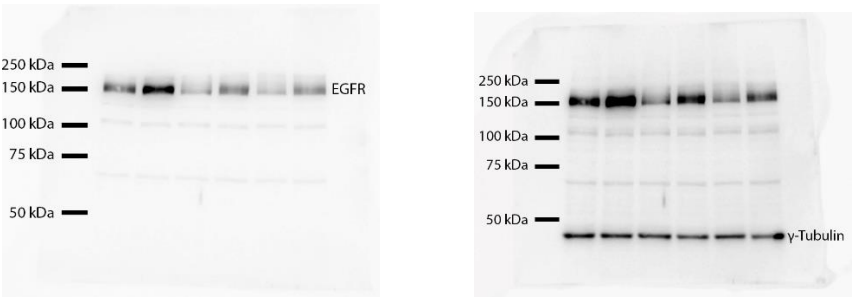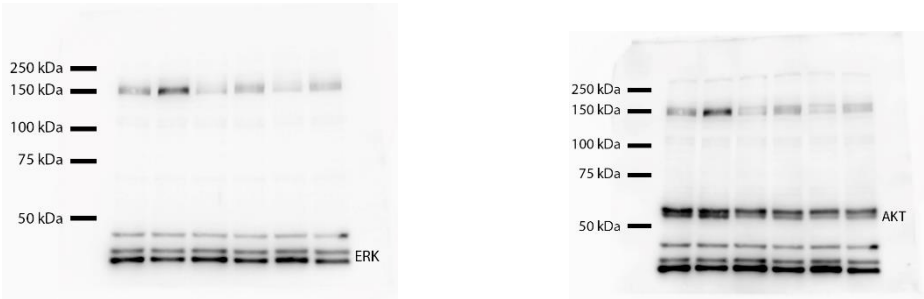

EGFR,  $\gamma$ -Tubulin, ERK and AKT #3

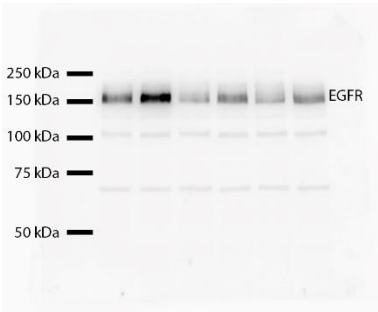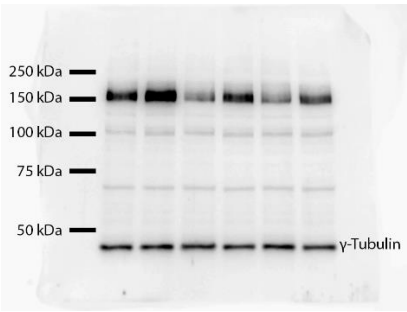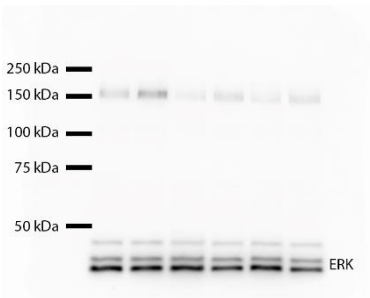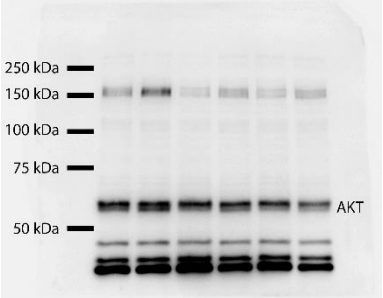

pEGFR,  $\gamma$ -Tubulin, pERK and pAKT(S473) #1

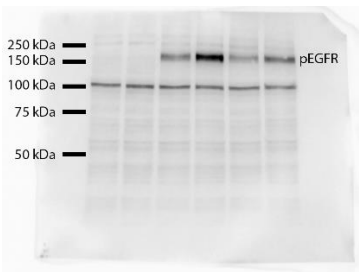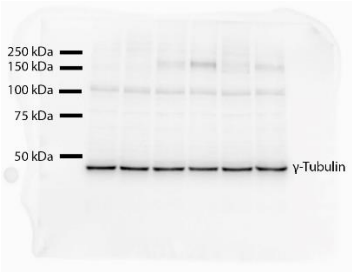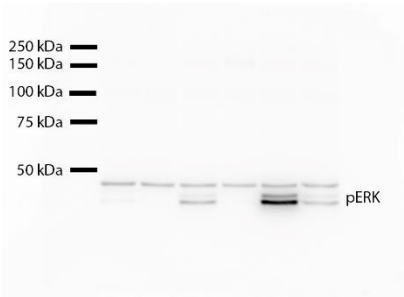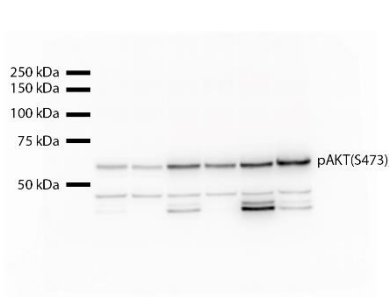

pAKT(T308) and  $\gamma$ -Tubulin #1

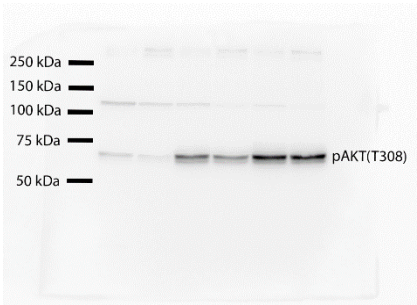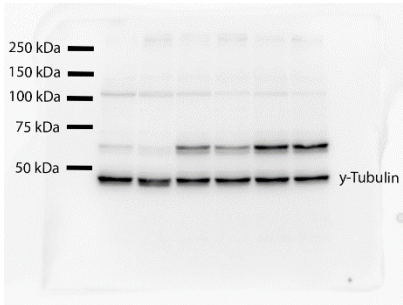

pEGFR,  $\gamma$ -Tubulin, pERK and pAKT(S473) #2

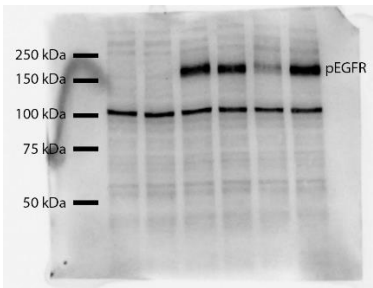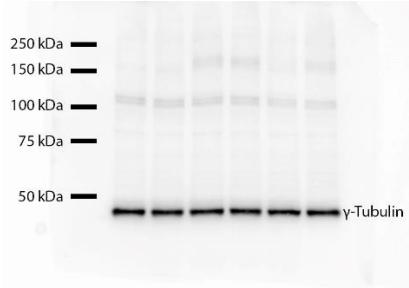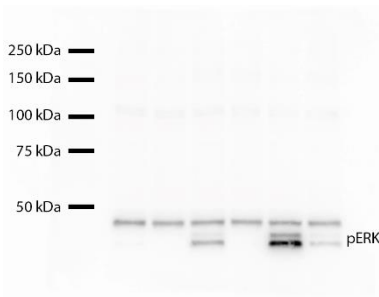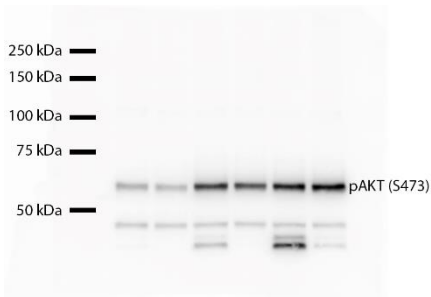

pAKT(T308) and  $\gamma$ -Tubulin #2

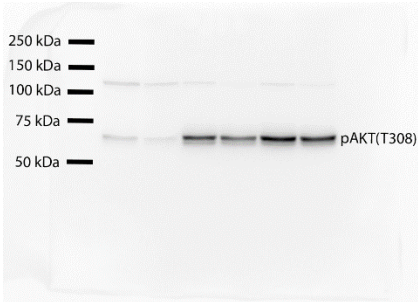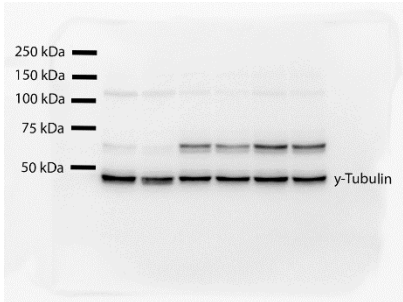

pEGFR,  $\gamma$ -Tubulin, pERK and pAKT(S473) #3

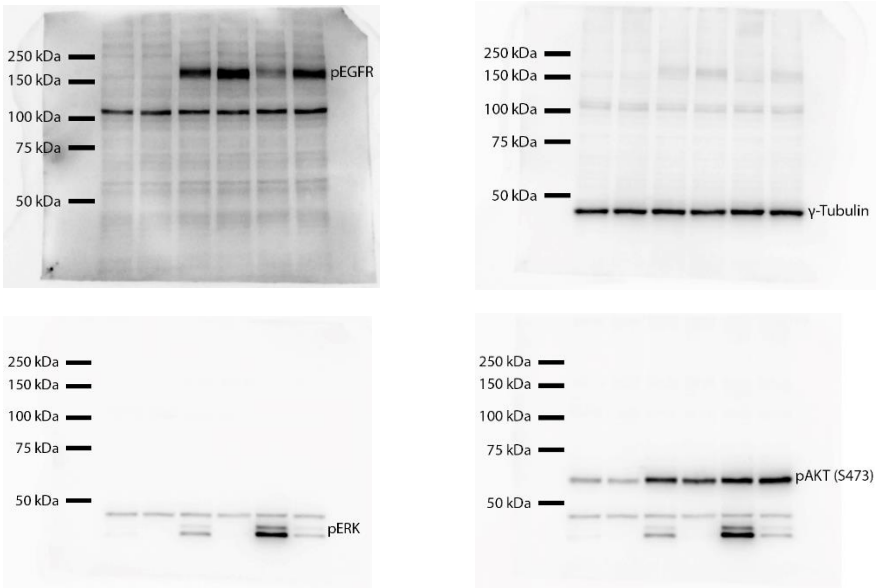

pAKT(T308) and  $\gamma$ -Tubulin #3

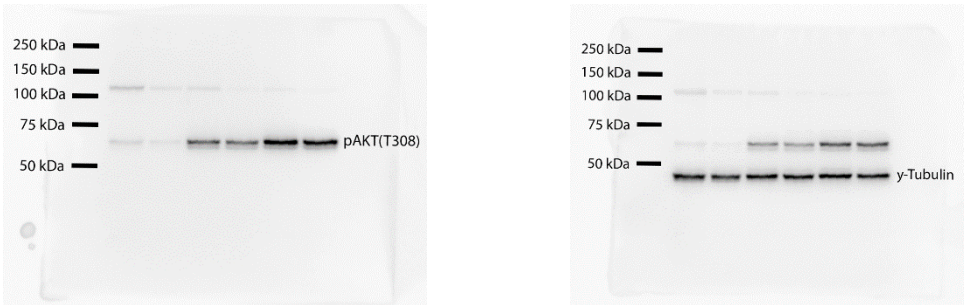

Western blots related to Figure 6 and Supplementary Figure 4: DU145 samples

Lanes from left to right: siCTRL -, siDHRS7 -, siCTRL EGF 1min, siDHRS7 EGF 1min, siCTRL EGF 5min, siDHRS7 EGF 5min.

DHRS7 and  $\gamma$ -Tubulin #1

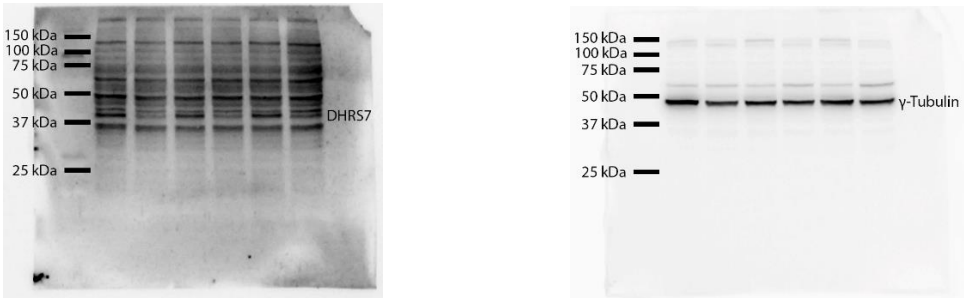

DHRS7 and  $\gamma$ -Tubulin #2

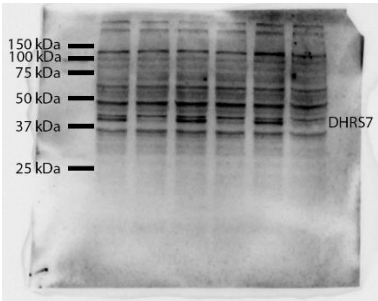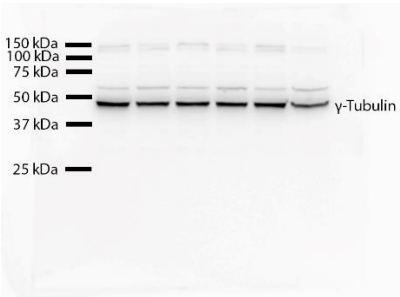

DHRS7 and  $\gamma$ -Tubulin #3

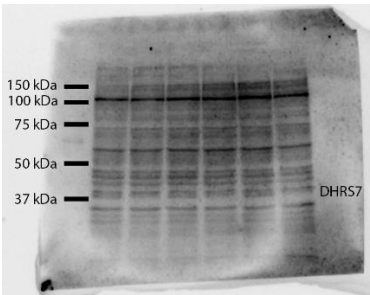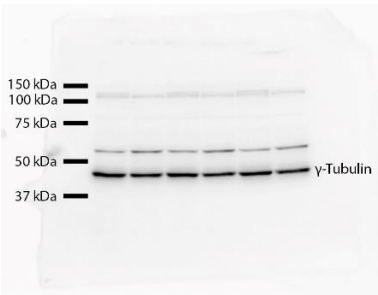

EGFR, STAT3,  $\gamma$ -Tubulin, ERK and AKT #1

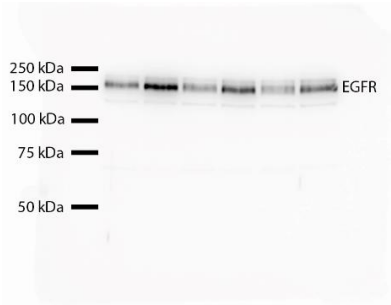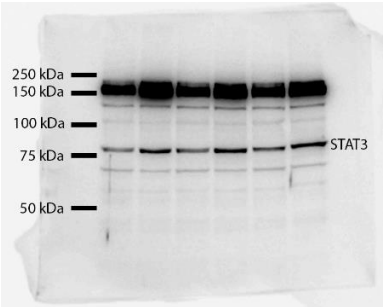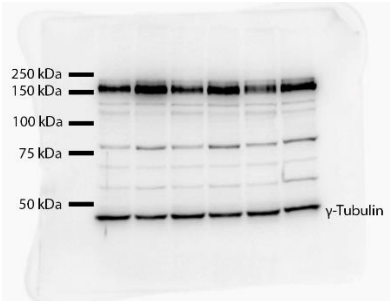

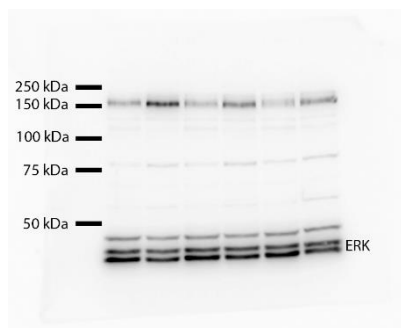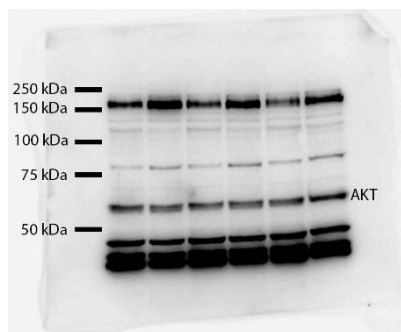

## EGFR, STAT3, $\gamma$ -Tubulin, ERK and AKT #2

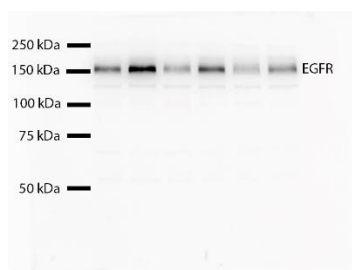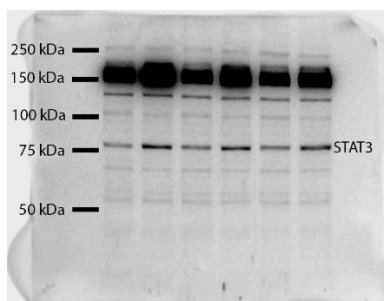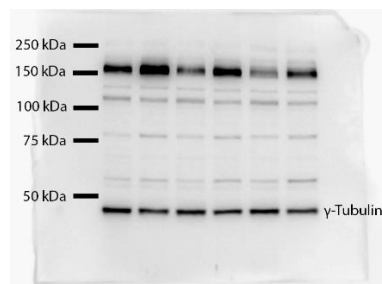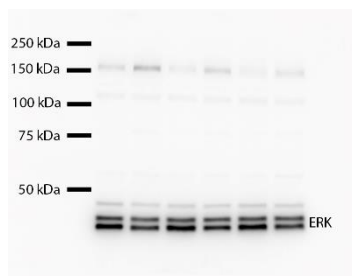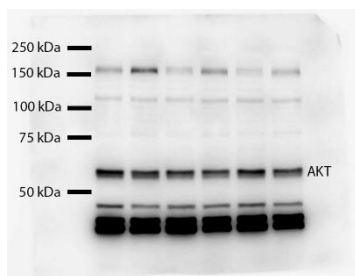

EGFR, STAT3,  $\gamma$ -Tubulin, ERK and AKT #3

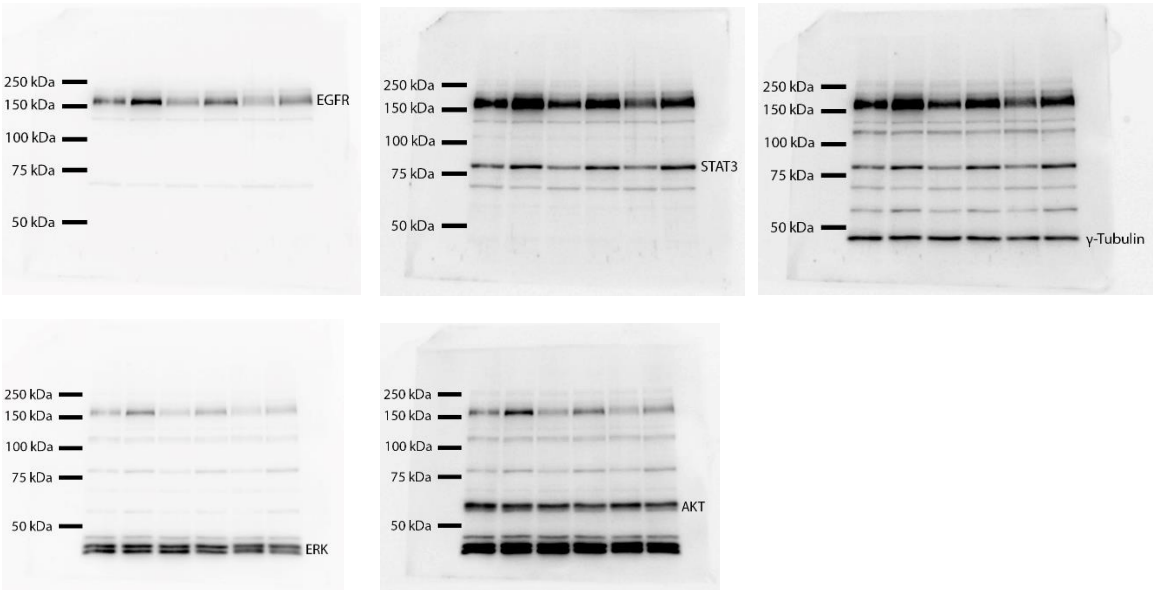

pEGFR, pSTAT3,  $\gamma$ -Tubulin, pERK and pAKT(S473) #1

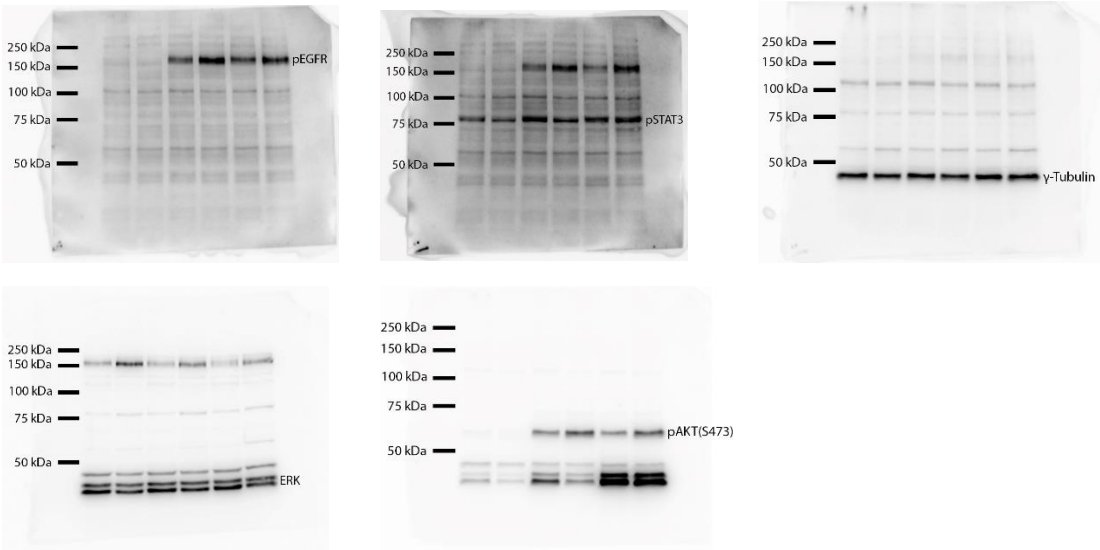

pAKT(T308) and  $\gamma$ -Tubulin #1

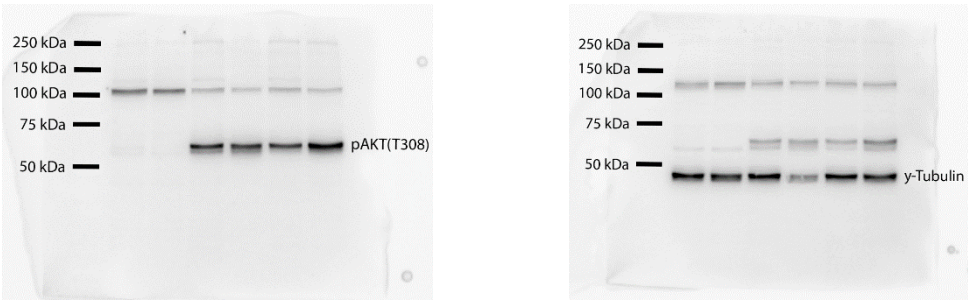



pEGFR, pSTAT3,  $\gamma$ -Tubulin, pERK and pAKT(S473) #2

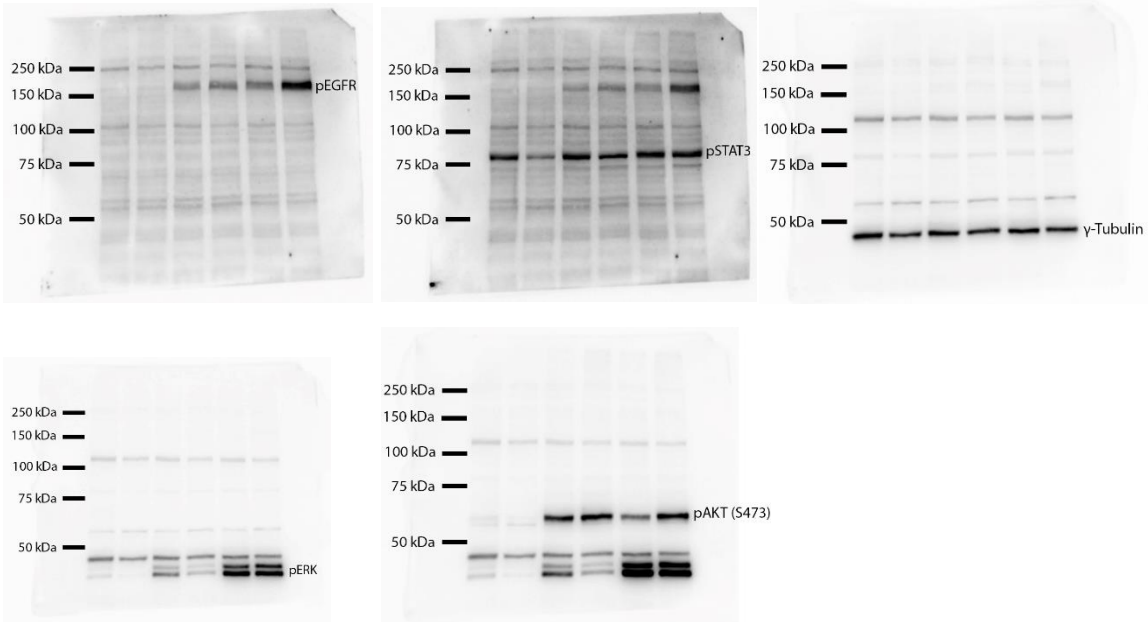

pAKT(T308) and  $\gamma$ -Tubulin #2

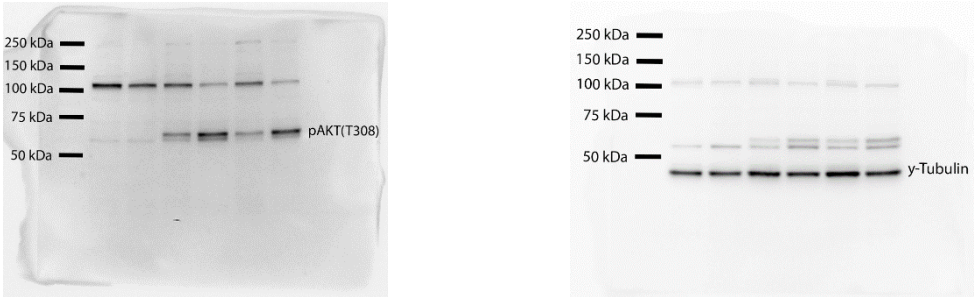

pEGFR, pSTAT3, γ-Tubulin, pERK and pAKT(S473) #3

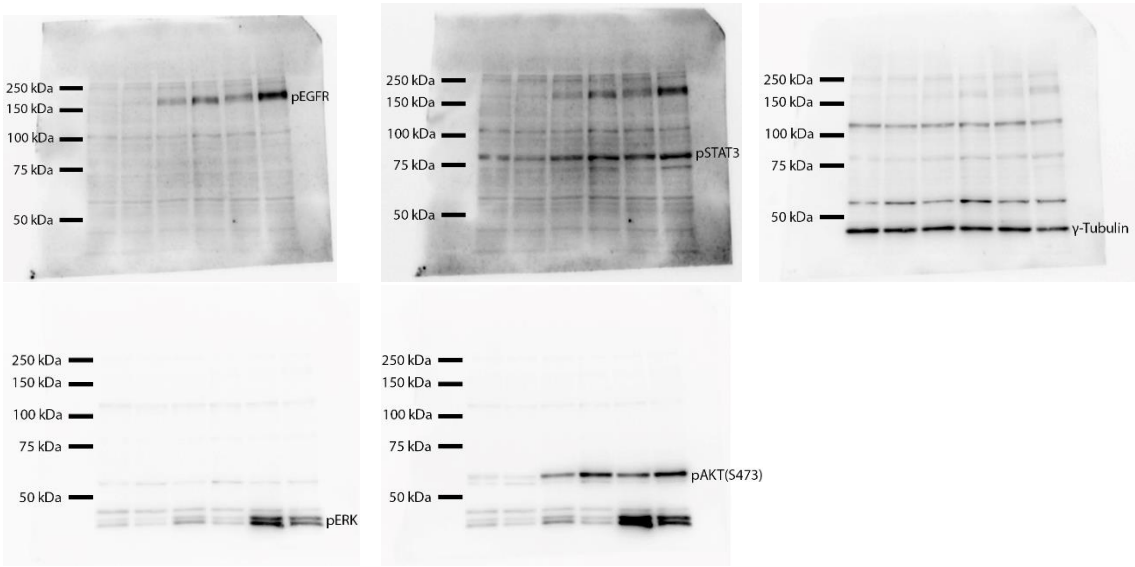

pAKT(T308) and γ-Tubulin #3

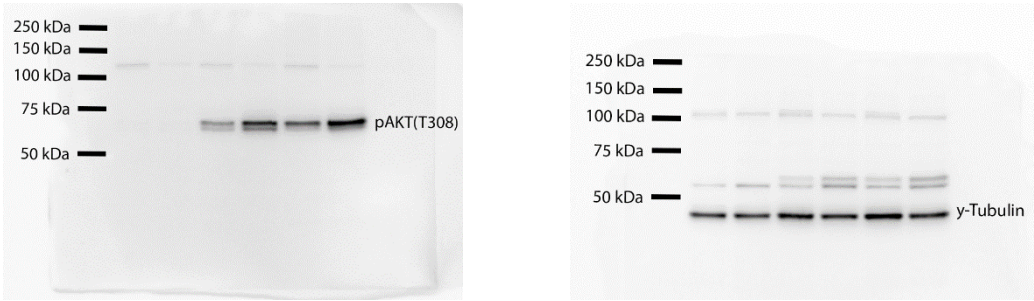

Western blots related to Supplementary Figure 2

Lanes from left to right: siCTRL 24h, siDHR7 24h, siCTRL 36h, siDHR7 36h, siCTRL 48h, siDHR7 48h.

AR and γ-Tubulin #1

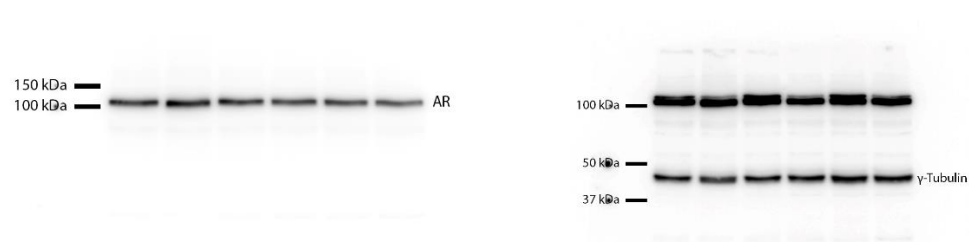

AR and  $\gamma$ -Tubulin #2

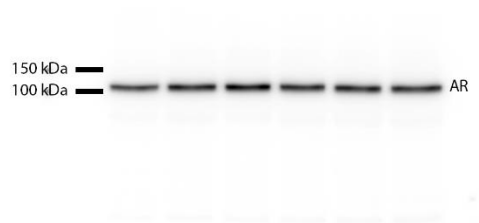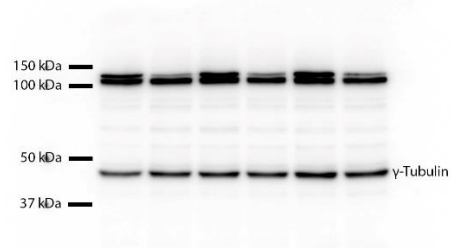

AR and  $\gamma$ -Tubulin #3

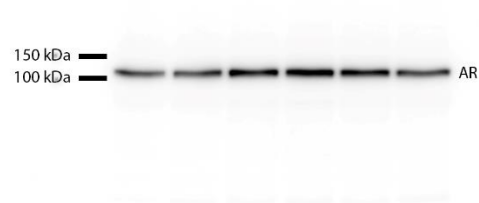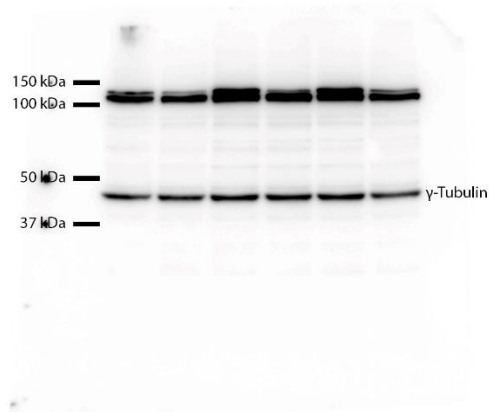

TMPRSS2, FKBP5 and  $\gamma$ -Tubulin #1

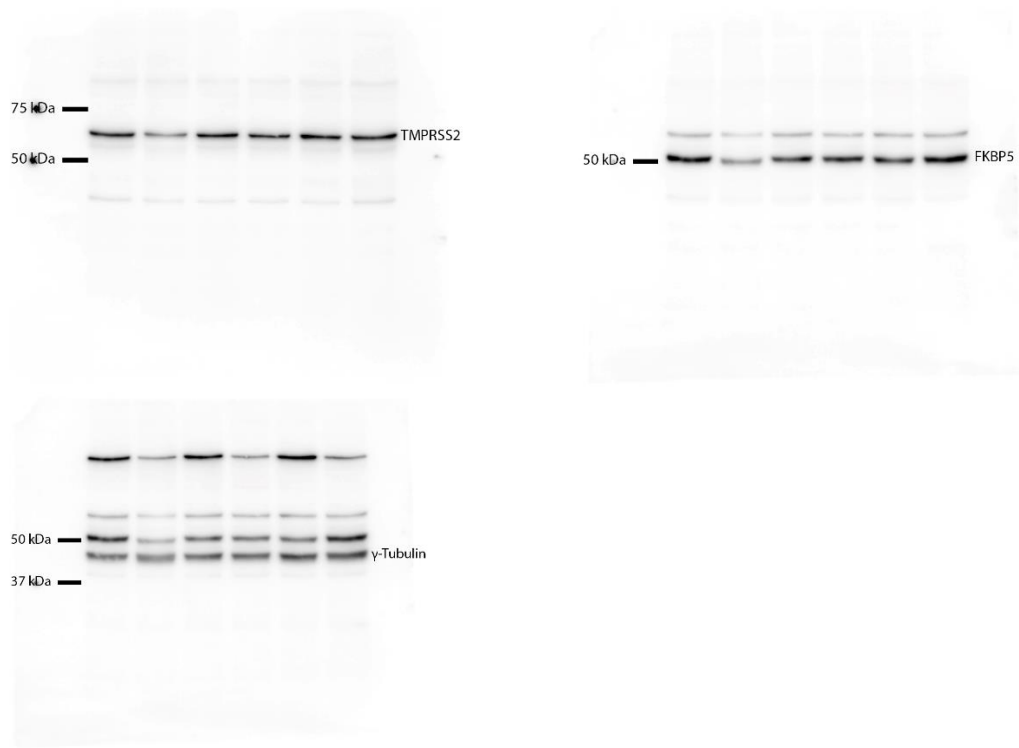

TMPRSS2, FKBP5 and  $\gamma$ -Tubulin #2

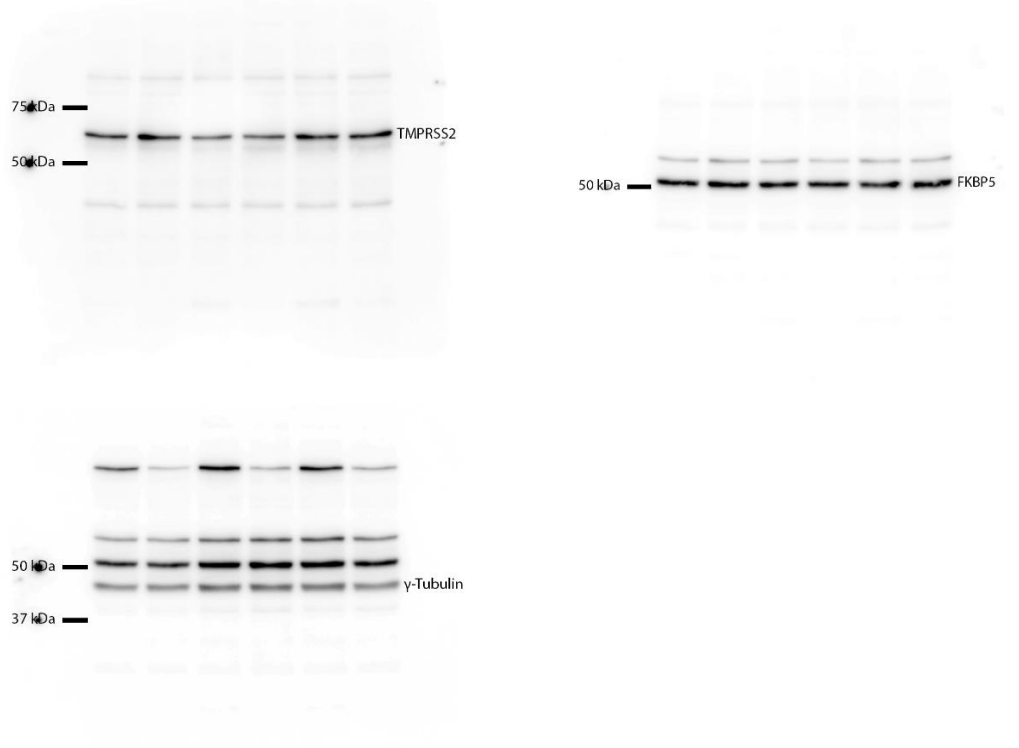

TMPRSS2, FKBP5 and  $\gamma$ -Tubulin #3

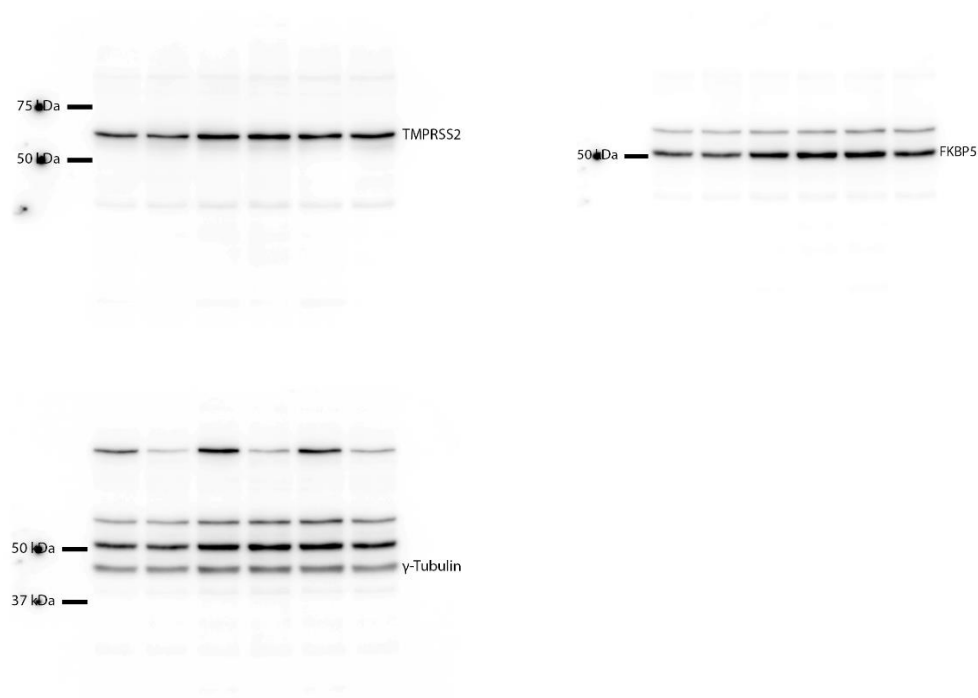

KLK3 and  $\gamma$ -Tubulin #1

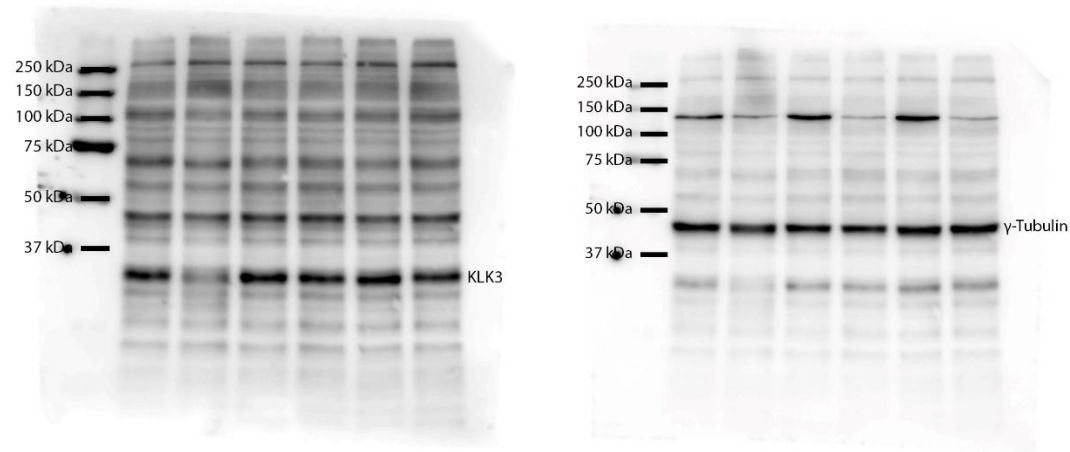

KLK3 and  $\gamma$ -Tubulin #2

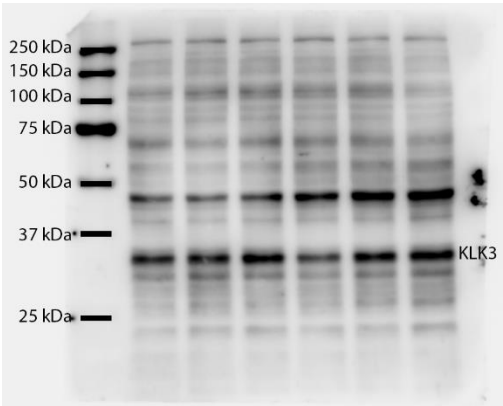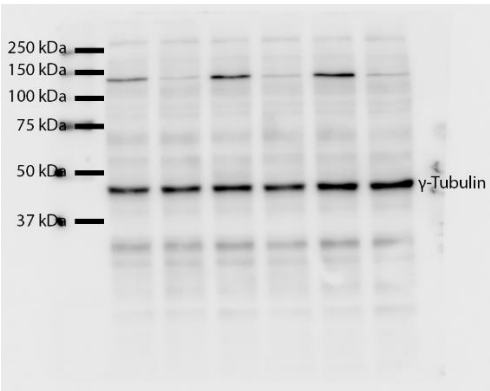

KLK3 and  $\gamma$ -Tubulin #3

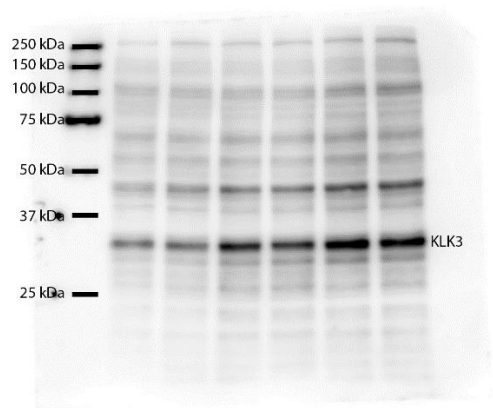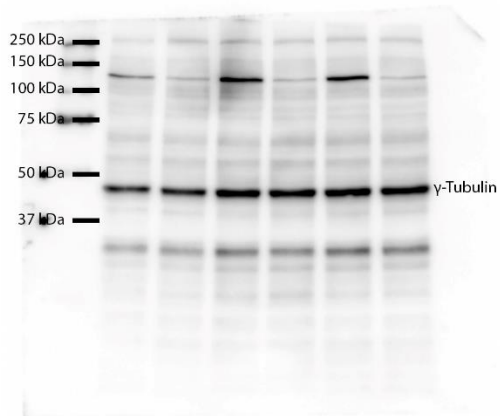

Supplement: s1 [file s1]
