# Supplementary material for: The Potential Tumor-Suppressor DHRS7 Inversely Correlates with EGFR Expression in Prostate Cancer Cells and Tumor Samples
Source: MDPI journal article supplement (doi:10.3390/cancers14133074), 2022-06-23
Supplement: s1 [file s1]

# The Potential Tumor Suppressor DHRS7 Inversely Correlates with EGFR Expression in Prostate Cancer Cells and Tumor Samples

Simon Stücheli <sup>1</sup>, Selene Araya <sup>1</sup>, Caner Ercan <sup>2,3</sup>, Seraina O. Moser <sup>1</sup>, John Gallon <sup>3</sup>, Paul Jenö <sup>4</sup>, Salvatore Piscuoglio <sup>2,3</sup>, Luigi Terracciano <sup>2</sup>, and Alex Odermatt <sup>1,\*</sup>

**Table S1.** siRNA sequences used for knockdown experiments

| Target Gene           | Sequence (5' – 3')        | Cat#           |
|-----------------------|---------------------------|----------------|
| <i>DHRS7</i>          | GAA AGA AGU UUG GAU CUC A | D-009573-02    |
| <i>EGFR siRNA-1</i>   | CCG CAA AUU CCG AGA CGA A | D-003114-32    |
| <i>EGFR siRNA-2</i>   | CAA AGU GUG UAA CGG AAU A | D-003114-33    |
| <i>EGFR siRNA-3</i>   | GUA ACA AGC UCA CGC AGU U | D-003114-34    |
| <i>EGFR siRNA-4</i>   | GAG GAA AUA UGU ACU ACG A | D-003114-35    |
| Non-targeting control | UGG UUU ACA UGU UUU CUG A | D-001810-03-05 |

**Table S2.** Primers used for RT-qPCR

| Target Gene    | Forward (5' – 3')               | Reverse (5' – 3')               |
|----------------|---------------------------------|---------------------------------|
| <i>AR</i>      | GAC ATG CGT TTG GAG ACT GC      | TTC CCT TCA GCG GCT CTT TT      |
| <i>DHRS7</i>   | GAG TTT GGT AGA ATC GAC ATT GTG | GAA AGA GGT ACA GAT ATG ATA CCC |
| <i>EGFR</i>    | GGC AGG AGT CAT GGG AGA A       | GCG ATG GAC GGG ATC TTA G       |
| <i>FKBP5</i>   | GAA TAC ACC AAA GCT GT          | CTC TTC CTT GGC ATC CT          |
| <i>KLK3</i>    | AGG CCT TCC CTG TAC AC          | GTC TTG GCC TGG TCA TTT CC      |
| <i>PPIA</i>    | CAT CTG CAC TGC CAA GAC TGA     | TGC AAT CCA GCT AGG CAT G       |
| <i>STAT3</i>   | CAG CAG CTT GAC ACA CGG TA      | AAA CAC CAA AGT GGC ATG TGA     |
| <i>TMPRSS2</i> | CTG CCA AGG TGC TTC TC          | TTA GCC GTC TGC CCT C           |
| <i>GAPDH</i>   | CAG CCT CAA GAT CAT CAG CA      | TTC TAG ACG GCA GGT CAG GT      |

**Table S3.** Antibodies used for Western blotting

| Target Protein     | Cat#                   | Manufacturer                                 | Clonality              | RRID        | Host species | Dilutions        |                    |
|--------------------|------------------------|----------------------------------------------|------------------------|-------------|--------------|------------------|--------------------|
|                    |                        |                                              |                        |             |              | Primary Antibody | Secondary Antibody |
| AKT                | 9272, Lot# 15          | Cell Signaling Technology (Danvers, MA, USA) | Polyclonal             | AB_329827   | Rabbit       | 1:2000           | 1:5000             |
| Phospho-AKT (S473) | 4060, Lot# 19          | Cell Signaling Technology                    | Monoclonal (D9E)       | AB_2315049  | Rabbit       | 1:2000           | 1:5000             |
| Phospho-AKT (T308) | 13038, Lot# 7          | Cell Signaling Technology                    | Monoclonal (D25E6)     | AB_2629447  | Rabbit       | 1:2000           | 1:5000             |
| AR                 | sc-7305, Lot# H3116    | Santa Cruz Technology (Dallas, TX, USA)      | Monoclonal (441)       | AB_626671   | Mouse        | 1:2000           | 1:5000             |
| DHRS7              | SAB1400567, Lot# J5091 | Sigma-Aldrich                                | Polyclonal             | AB_1847656  | Mouse        | 1:2000           | 1:5000             |
| EGFR               | sc-373746, Lot# C2919  | Santa Cruz Technology                        | Monoclonal (A-10)      | AB_10920395 | Mouse        | 1:1000           | 1:5000             |
| Phospho-EGFR       | sc-81488, Lot# C2019   | Santa Cruz Technology                        | Monoclonal (15A2)      | AB_1125777  | Mouse        | 1:1000           | 1:5000             |
| ERK                | 4695, Lot# 28          | Cell Signaling Technology                    | Monoclonal (137F5)     | AB_390779   | Rabbit       | 1:2000           | 1:5000             |
| Phospho-ERK        | 4370S, Lot# 28         | Cell Signaling Technology                    | Monoclonal (D13.14.4E) | AB_2315112  | Rabbit       | 1:1000           | 1:5000             |
| FKBP5              | sc-271547, Lot# C1918  | Santa Cruz Technology                        | Monoclonal (D-4)       | AB_10649040 | Mouse        | 1:2000           | 1:2000             |
| KLK3               | sc-65602, Lot# A0913   | Santa Cruz Technology                        | Monoclonal (SPM352)    | AB_2134512  | Mouse        | 1:75             | 1:5000             |
| STAT3              | sc-8019, Lot# A1719    | Santa Cruz Technology                        | Monoclonal (F-2)       | AB_628293   | Mouse        | 1:2000           | 1:5000             |
| Phospho-STAT3      | sc-8059, Lot# L1619    | Santa Cruz Technology                        | Monoclonal (B-7)       | AB_628292   | Mouse        | 1:2000           | 1:5000             |
| TMPRSS2            | sc-515727, Lot# H0916  | Santa Cruz Technology                        | Monoclonal (H-4)       | AB_2892118  | Mouse        | 1:1000           | 1:5000             |
| $\gamma$ -Tubulin  | T5192, Lot# 059M4807V  | Sigma-Aldrich                                | Polyclonal             | AB_261690   | Rabbit       | 1:2000           | 1:5000             |
| Mouse IgG          | A0168, Lot# 079M4881V  | Sigma-Aldrich                                | Polyclonal             | AB_257867   | Goat         | -                | -                  |
| Rabbit IgG         | 7074S, Lot# 22         | Cell Signaling Technology                    | Polyclonal             | AB_2099233  | Goat         | -                | -                  |

**Table S4.** Distribution of the Gleason Scores in percentage, among the low and high expression groups of DHRS7 and EGFR of the overall survival analysis.

| Gleason Score | DHRS7 Expression |      | EGFR Expression |      |
|---------------|------------------|------|-----------------|------|
|               | Low              | High | Low             | High |
| 6             | -                | 21 % | 27 %            | 3 %  |
| 7             | -                | 40 % | 49 %            | 18 % |
| 8             | -                | 7 %  | 4 %             | 8 %  |
| 9             | 62 %             | 30 % | 18 %            | 61 % |
| 10            | 38 %             | 3 %  | 2 %             | 11 % |

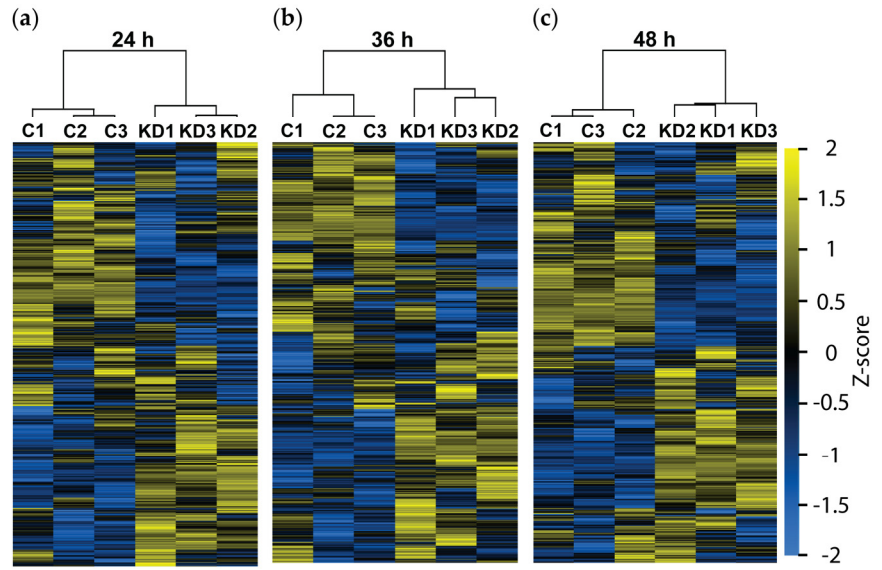

**Figure S1.** Heat maps of the proteomics data after knockdown of DHRS7 in LNCaP cells. Representation of protein changes following DHRS7 knockdown for (a) 24 h; (b) 36 h; and (c) 48 h. Expression levels were normalized using Z-score followed by hierarchical clustering with the Perseus software. Each time point was measured in three technical replicates. C = non-targeting siRNA control; KD = knockdown of *DHRS7*. Yellow: upregulated proteins; blue: downregulated proteins.

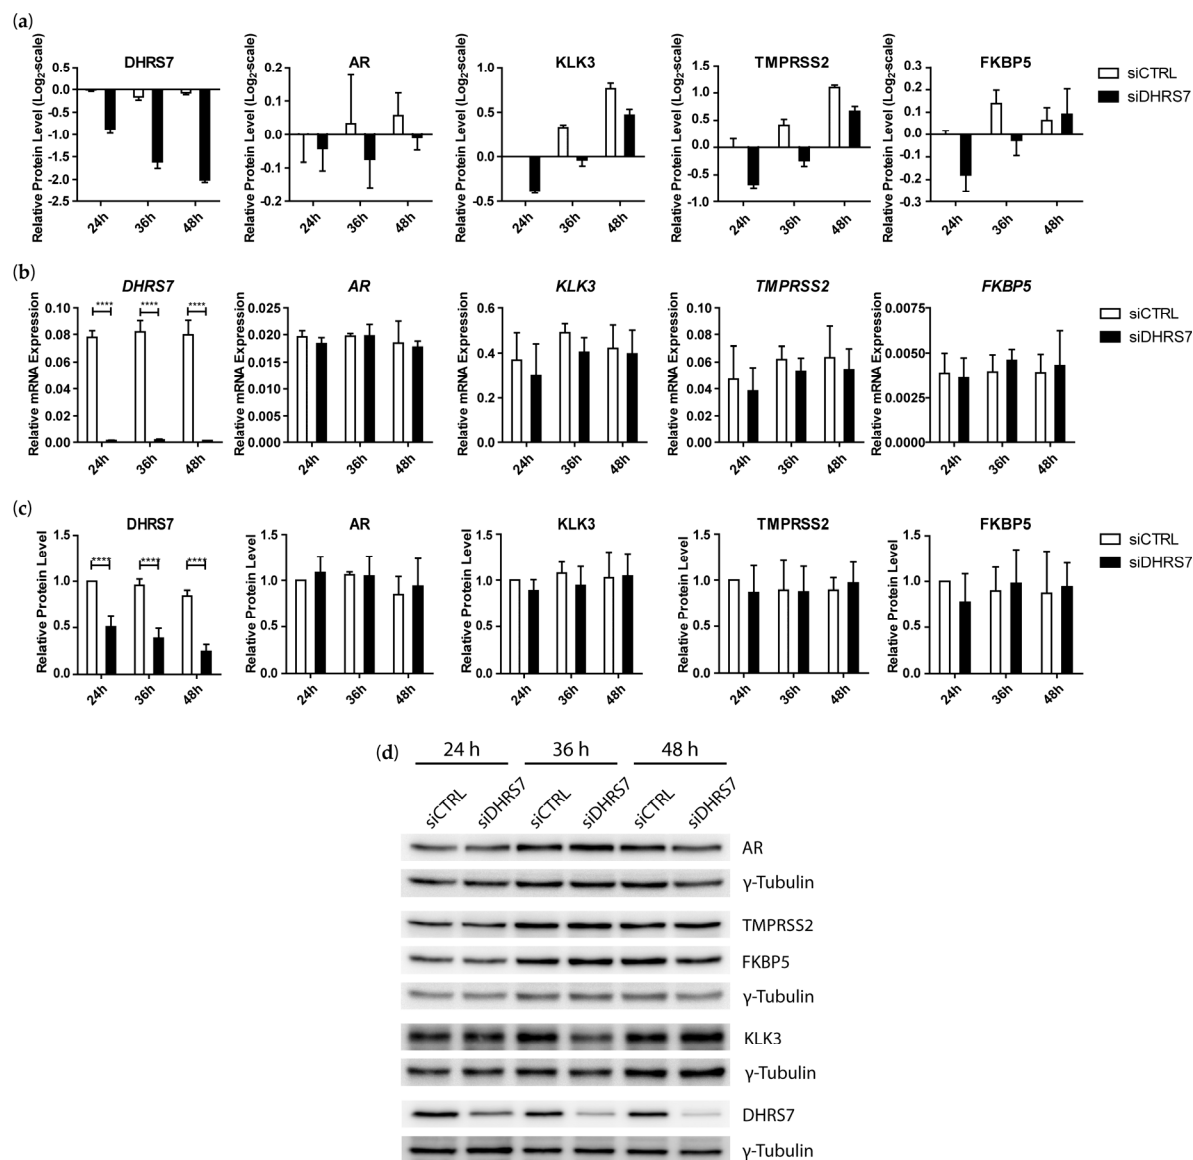

**Figure S2.** Expression of AR and its target genes *KLK3*, *TMPRSS2* and *FKBP5* in LNCaP cells after *DHR57* knockdown. *DHR57* was knocked-down in LNCaP cells for 24 h, 36 h and 48 h. **(a)** Relative protein expression from the proteomics experiments. Control at 24 h was set to zero and all other data sets were compared to the control at 24 h. **(b)** mRNA expression levels relative to that of *PPIA*. **(c)** Densitometry analysis of protein expression levels relative to the control at 24 h and normalized to  $\gamma$ -Tubulin. **(d)** Representative Western Blot (one of three) with  $\gamma$ -Tubulin as a loading control. Data represent mean  $\pm$  SD of the proteomics data ( $n = 1$ , technical triplicates, panel **(a)**) and mean  $\pm$  SD of three independent experiments for mRNA and densitometry ( $n = 3$ , panel **(b)** and **(c)**). siCTRL = non-targeting siRNA control; siDHR57 = siRNA against *DHR57*. For mRNA and densitometry results statistical significance was calculated using two-way ANOVA with Bonferroni multiple comparison post-test. \*\*\*\*  $p < 0.0001$ .

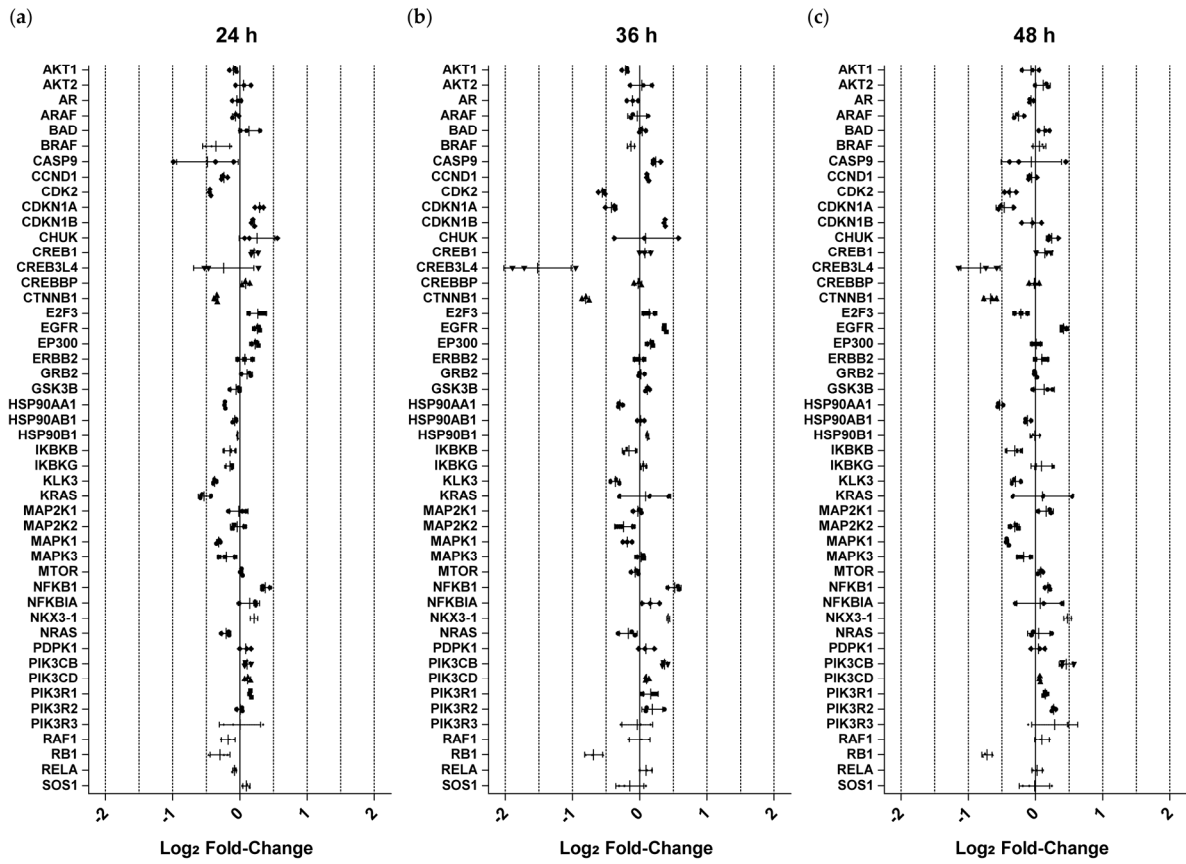

**Figure S3.** Proteins with the KEGG annotation “Prostate cancer”. Knockdown of *DHRS7* in LNCaP cells was performed for (a) 24 h; (b) 36 h; and (c) 48 h. Expression levels are displayed as log<sub>2</sub> fold-change (*DHRS7* knockdown compared to non-targeting siRNA control). Data points indicate technical triplicates with their mean  $\pm$  SD (n = 1).

(a)

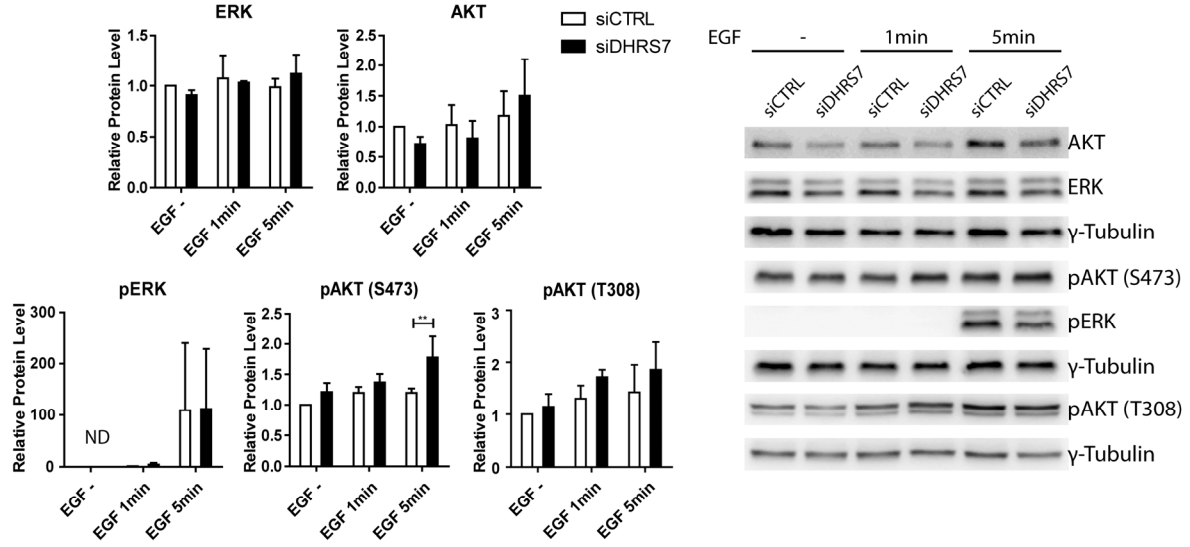

(b)

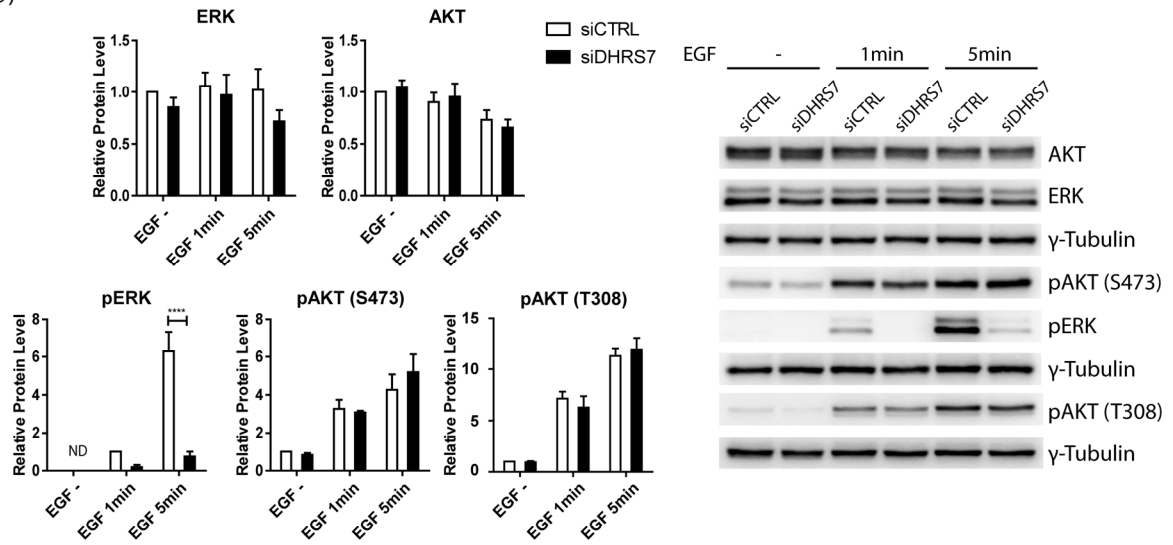

(c)

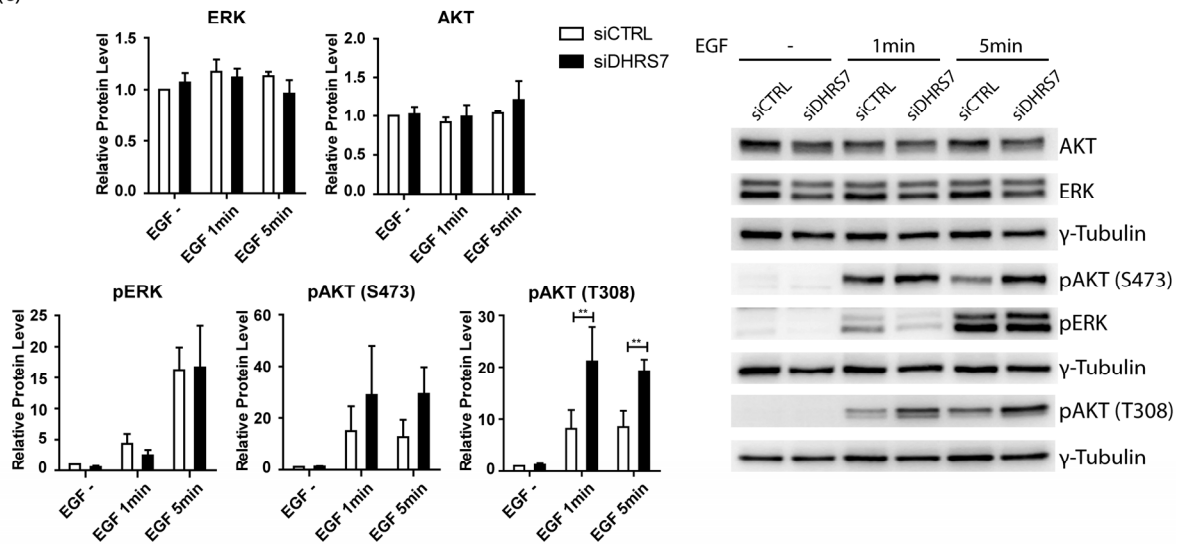

**Figure S4.** Effect of *DHRS7* knockdown on ERK and AKT and their phosphorylation in (a) LNCaP, (b) PC-3, and (c) DU145 cells treated with EGF. Densitometry analysis of protein expression and phosphorylation levels are relative to control without treatment, or after 1 min of treatment where appropriate, and normalized to the  $\gamma$ -Tubulin loading control. Representative Western blots (one of three) are shown for each cell line. Data represent mean  $\pm$  SD of three independent experiments ( $n = 3$ ). CTRL = non-targeting siRNA control; KD = siRNA against *DHRS7*. Statistical significance was calculated using two-way ANOVA with Bonferroni multiple comparison post-test. \*\*  $p < 0.01$ ; \*\*\*\*  $p < 0.0001$ .

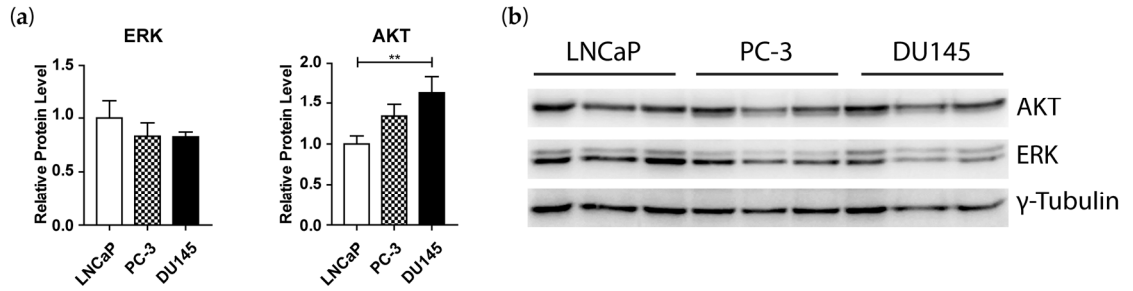

**Figure S5.** Expression of ERK and AKT in LNCaP, PC-3, and DU145 cells. (a) Densitometry analysis of protein expression levels normalized to the levels in LNCaP cells and the  $\gamma$ -Tubulin loading control. (b) Western blot of three individual samples per cell line with  $\gamma$ -Tubulin as a loading control. Data represent mean  $\pm$  SD of three independent samples ( $n = 3$ ). Statistical significance was calculated using one-way ANOVA with Bonferroni multiple comparison post-test. \*\*  $p < 0.01$

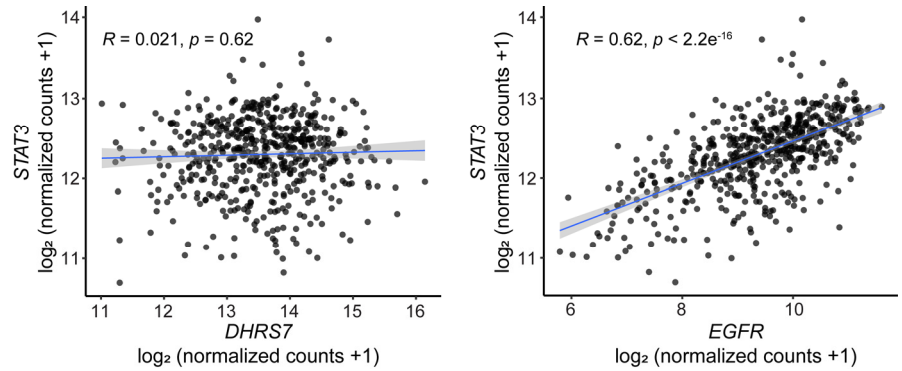

**Figure S6.** Correlation of the TCGA data of *STAT3* with *DHRS7* and *EGFR*, respectively, in PCa. The correlation was assessed using Spearman's correlation.  $n = 550$  each.

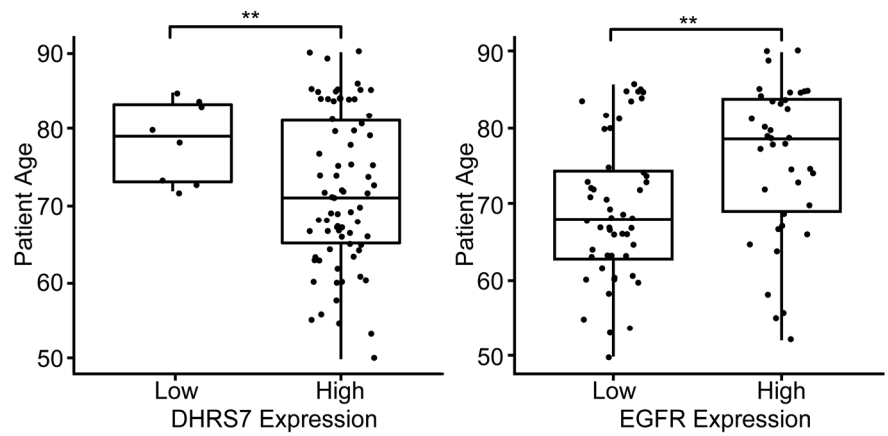

**Figure S7.** Age of patients within the low and high expression groups of DHR57 and EGFR of the overall survival analysis. Statistical significance was calculated using a two-tailed t-test. \*\*  $p < 0.01$
