# Supplementary material for: The Potential Tumor-Suppressor DHRS7 Inversely Correlates with EGFR Expression in Prostate Cancer Cells and Tumor Samples
Source: Cancers (Basel). 2022 Jun 23;14(13):3074. doi: 10.3390/cancers14133074 (PMC9264982; doi:10.3390/cancers14133074)
Supplement: Supplementary file 1 [file cancers-14-03074-s001.zip]

Archive with 14 entries (14 files):
- cancers-1775926_R1-supplementary_final.pdf
- DHRS7_FigureS1.tif
- DHRS7_FigureS2.tif
- DHRS7_FigureS3.tif
- DHRS7_FigureS4.tif
- DHRS7_FigureS5.tif
- DHRS7_FigureS6.tif
- DHRS7_FigureS7.tif
- DHRS7_Graphical_Abstract.psd
- DHRS7_Supplementary_File1.xlsx
- DHRS7_Supplementary_File2.xlsx
- DHRS7_Supplementary_File3.xlsx
- DHRS7_Supplementary_File4.xlsx
- DHRS7_Supplementary_File5.pdf
