# Supplementary material for: The Potential Tumor-Suppressor DHRS7 Inversely Correlates with EGFR Expression in Prostate Cancer Cells and Tumor Samples
Source: Cancers (Basel). 2022 Jun 23;14(13):3074. doi: 10.3390/cancers14133074 (PMC9264982; doi:10.3390/cancers14133074)
Supplement: Supplementary file 1 [file cancers-14-03074-s001.zip › DHRS7_Supplementary_File1.xlsx]

## Sheet: Information
Information:
This file lists the proteins of the proteomics experiment of the 24 h time points.
Sheets:	Original Export:	The complete list originally exported from Proteome Discoverer 2.2.
	Filtered:	The list of proteins filtered as described under the Materials and Methods section.
	Normalized:	List of proteins (filtered) and median normalized by calculating the fold change of the technical replicates (repeated injection/measurement by mass-spectrometry) of Ctrl and KD
		over their respective technical replicate of the NT control (Non-Treated; LNCaP sample not subjected to any treatment), followed by calculating the log2-value and subtracting the median of the proteome signal of the technical replicate.
Headers:	NT	Non-Treated LNCap sample not subjected to any treatment
	Ctrl	siRNA-control sample
	KD	Knock-down of DHRS7
	FC 24h Ctrl/KD 1 over NT 1	Fold change of the abundance of the Ctrl (or KD) sample over the NT sample of the respective technical replicate
	Log2 FC 24h Ctrl/KD 1 over NT 1	Log2 value of the calculated fold change of Ctrl (or KD) over the NT sample of the respective technical replicate
	24h Ctrl/KD 1 (Median Norm)	Median normalized fold change of the calculated fold chage of Ctrl (or KD) over the NT sample of the respective technical replicate (as a Log2-value)

## Sheet: Original Export
Protein FDR Confidence: Mascot	Protein FDR Confidence: Sequest HT	Master	Accession	Description	Exp. q-value: Mascot	Exp. q-value: Sequest HT	Coverage [%]	# Peptides	# PSMs	# Unique Peptides	# Protein Groups	# AAs	MW [kDa]	calc. pI	Score Mascot: Mascot	Score Sequest HT: Sequest HT	# Peptides (by Search Engine): Mascot	# Peptides (by Search Engine): Sequest HT	# Razor Peptides	Abundances (Grouped): NT 1	Abundances (Grouped): NT 2	Abundances (Grouped): NT 3	Abundances (Grouped): 24h Ctrl 1	Abundances (Grouped): 24h Ctrl 2	Abundances (Grouped): 24h Ctrl 3	Abundances (Grouped): 24h KD 1	Abundances (Grouped): 24h KD 2	Abundances (Grouped): 24h KD 3	Modifications
High	High	Master Protein	P04406	Glyceraldehyde-3-phosphate dehydrogenase OS=Homo sapiens GN=GAPDH PE=1 SV=3	0	0	75	22	6173	21	1	335	36	8.46	110996	11135.3	22	15	1	3.05238e+10	3.25834e+10	3.56201e+10	3.81568e+10	4.23564e+10	4.17903e+10	4.59504e+10	4.94276e+10	4.50599e+10
High	High	Master Protein	P68104	Elongation factor 1-alpha 1 OS=Homo sapiens GN=EEF1A1 PE=1 SV=1	0	0	76	32	7340	19	1	462	50.1	9.01	153096	10259.7	32	17	15	4.27122e+10	4.20196e+10	4.26951e+10	6.38147e+10	6.06409e+10	6.24363e+10	6.10178e+10	6.76844e+10	7.44503e+10
High	High	None	Q5VTE0	Putative elongation factor 1-alpha-like 3 OS=Homo sapiens GN=EEF1A1P5 PE=5 SV=1	0	0	62	30	7189	18	1	462	50.2	9.07	150526	10064.4	30	15	0	4.22009e+10	4.13964e+10	4.20045e+10	6.252e+10	5.956e+10	6.10961e+10	5.95573e+10	6.60891e+10	7.28375e+10
High	High	Master Protein	Q05639	Elongation factor 1-alpha 2 OS=Homo sapiens GN=EEF1A2 PE=1 SV=1	0	0	76	31	6313	18	1	463	50.4	9.03	130954	8843.95	31	18	0	5.48021e+09	5.99649e+09	5.84906e+09	7.56655e+09	7.44296e+09	8.17975e+09	8.52897e+09	8.48835e+09	9.05762e+09
High	High	Master Protein	P06733	Alpha-enolase OS=Homo sapiens GN=ENO1 PE=1 SV=2	0	0	75	30	5482	25	1	434	47.1	7.39	126907	8142.5	30	20	5	2.35543e+10	2.50276e+10	2.42845e+10	3.18068e+10	3.34372e+10	3.28652e+10	3.33273e+10	3.24171e+10	3.44892e+10
High	High	Master Protein	P10809	60 kDa heat shock protein, mitochondrial OS=Homo sapiens GN=HSPD1 PE=1 SV=2	0	0	78	47	5043	47	1	573	61	5.87	111239	7216.34	47	37	0	1.59455e+10	1.56748e+10	1.69637e+10	2.04286e+10	2.19672e+10	2.13513e+10	2.60644e+10	2.66314e+10	2.67041e+10
High	High	Master Protein	P49327	Fatty acid synthase OS=Homo sapiens GN=FASN PE=1 SV=3	0	0	67	141	5904	140	1	2511	273.3	6.44	134174	7185.64	141	89	1	3.52364e+10	3.50725e+10	3.55421e+10	3.40999e+10	3.58201e+10	3.49187e+10	3.81509e+10	3.87235e+10	3.88838e+10	Acetyl [N-Term]
High	High	Master Protein	P35579	Myosin-9 OS=Homo sapiens GN=MYH9 PE=1 SV=4	0	0	69	167	5250	135	1	1960	226.4	5.6	125037	6730.55	163	101	39	1.66601e+10	1.68984e+10	1.76781e+10	2.04778e+10	2.14627e+10	2.1282e+10	2.24123e+10	2.29581e+10	2.2838e+10
High	High	Master Protein	P60709	Actin, cytoplasmic 1 OS=Homo sapiens GN=ACTB PE=1 SV=1	0	0	79	27	5029	2	1	375	41.7	5.48	109837	6497.68	27	14	36	4.45556e+10	4.42371e+10	4.89986e+10	5.99256e+10	6.40706e+10	6.20515e+10	6.57797e+10	6.66669e+10	6.67556e+10	Acetyl [N-Term; N-Term]
High	High	Master Protein	P63261	Actin, cytoplasmic 2 OS=Homo sapiens GN=ACTG1 PE=1 SV=1	0	0	79	27	5076	2	1	375	41.8	5.48	111073	6486.31	27	14	0	1.24612e+09	1.30166e+09	1.32996e+09	1.46743e+09	1.66592e+09	1.3531e+09	1.56957e+09	1.39643e+09	1.54455e+09	Acetyl [N-Term; N-Term]
High	High	Master Protein	P08238	Heat shock protein HSP 90-beta OS=Homo sapiens GN=HSP90AB1 PE=1 SV=4	0	0	68	59	4995	36	1	724	83.2	5.03	107028	5751.76	58	37	25	5.01956e+10	5.07541e+10	5.07839e+10	5.61102e+10	6.11041e+10	6.10926e+10	6.15588e+10	6.26478e+10	6.31189e+10
High	High	Master Protein Rejected	P68363	Tubulin alpha-1B chain OS=Homo sapiens GN=TUBA1B PE=1 SV=1	0	0	81	31	4303	0	0	451	50.1	5.06	94548	5742.74	31	20	0
High	High	Master Protein	Q71U36	Tubulin alpha-1A chain OS=Homo sapiens GN=TUBA1A PE=1 SV=1	0	0	81	31	3715	2	1	451	50.1	5.06	77475	5359.65	31	21	40	3.30829e+10	3.39984e+10	3.44572e+10	3.69932e+10	4.06174e+10	3.7032e+10	3.7995e+10	4.145e+10	3.79881e+10
High	High	Master Protein	P14618	Pyruvate kinase PKM OS=Homo sapiens GN=PKM PE=1 SV=4	0	0	77	49	3741	48	1	531	57.9	7.84	88917	5183.52	49	32	1	2.05789e+10	2.03528e+10	2.03839e+10	2.25392e+10	2.37796e+10	2.38654e+10	2.576e+10	2.4921e+10	2.68616e+10	Acetyl [N-Term]
High	High	Master Protein	P68366	Tubulin alpha-4A chain OS=Homo sapiens GN=TUBA4A PE=1 SV=1	0	0	69	28	3762	7	1	448	49.9	5.06	80999	4962.08	28	19	0	3.15025e+09	3.34603e+09	3.46246e+09	3.35301e+09	3481986065	3.50998e+09	3.41976e+09	3.70541e+09	3.60066e+09
High	High	Master Protein	Q00610	Clathrin heavy chain 1 OS=Homo sapiens GN=CLTC PE=1 SV=5	0	0	66	102	3266	82	1	1675	191.5	5.69	72103	4417.84	102	69	23	1.04334e+10	1.00911e+10	1.02842e+10	1.18291e+10	1.25917e+10	1.25429e+10	1.278e+10	1.28226e+10	1.28416e+10	Acetyl [N-Term]
High	High	Master Protein	P07900	Heat shock protein HSP 90-alpha OS=Homo sapiens GN=HSP90AA1 PE=1 SV=5	0	0	63	49	3799	30	1	732	84.6	5.02	85474	4391.18	48	30	4	8.48628e+09	8.57832e+09	8.97908e+09	1.08175e+10	1.09203e+10	1.12742e+10	1.00756e+10	1.05735e+10	1.06923e+10
High	High	Master Protein	Q14204	Cytoplasmic dynein 1 heavy chain 1 OS=Homo sapiens GN=DYNC1H1 PE=1 SV=5	0	0	63	277	4203	277	1	4646	532.1	6.4	93470	4367.75	276	134	0	6.50274e+09	6.37613e+09	6.69014e+09	8.13037e+09	8.57158e+09	8.49351e+09	9.37892e+09	9.7003e+09	9.74941e+09	Acetyl [N-Term]
High	High	None	Q13748	Tubulin alpha-3C/D chain OS=Homo sapiens GN=TUBA3C PE=1 SV=3	0	0	60	22	2887	1	1	450	49.9	5.1	58506	4320.63	22	17	0	2.35577e+10	2.43354e+10	2.3476e+10	2.71617e+10	2.87298e+10	2.60247e+10	2.63498e+10	2.93982e+10	2.65286e+10
High	High	Master Protein	Q9BQE3	Tubulin alpha-1C chain OS=Homo sapiens GN=TUBA1C PE=1 SV=1	0	0	76	30	3438	2	1	449	49.9	5.1	78662	4317.94	30	21	1	1.78265e+09	1.87207e+09	1.78364e+09	2.57024e+09	2.78144e+09	2.49931e+09	2.87498e+09	3.00035e+09	2.87478e+09
High	High	Master Protein	P12277	Creatine kinase B-type OS=Homo sapiens GN=CKB PE=1 SV=1	0	0	82	25	3063	23	1	381	42.6	5.59	70938	4059.69	25	19	3	1.98933e+10	1.82476e+10	2.02227e+10	2.15788e+10	2.27729e+10	2.59373e+10	2.63669e+10	2.50478e+10	2.43862e+10
High	High	Master Protein	O75369	Filamin-B OS=Homo sapiens GN=FLNB PE=1 SV=2	0	0	75	152	3062	138	1	2602	278	5.73	68564	3843.08	150	96	16	5.05333e+09	5.04966e+09	5.14293e+09	6.29078e+09	6713528554	6.88672e+09	6.88815e+09	7.02252e+09	7.06558e+09
High	High	None	Q6PEY2	Tubulin alpha-3E chain OS=Homo sapiens GN=TUBA3E PE=1 SV=2	0	0	50	16	2504	1	1	450	49.8	5.14	50167	3832.61	16	12	0	2.07502e+10	2.1853e+10	2.08683e+10	2.3463e+10	2.51517e+10	2.19444e+10	2.25567e+10	2.55752e+10	2.30403e+10
High	High	Master Protein	P35580	Myosin-10 OS=Homo sapiens GN=MYH10 PE=1 SV=3	0	0	66	149	2920	118	1	1976	228.9	5.54	67987	3766.52	149	80	9	3.32445e+09	3.20266e+09	3.26872e+09	3.97845e+09	4.18866e+09	4.25616e+09	4.55263e+09	4.87539e+09	4.85697e+09
High	High	Master Protein	P07437	Tubulin beta chain OS=Homo sapiens GN=TUBB PE=1 SV=2	0	0	82	32	3979	4	1	444	49.6	4.89	102059	3663	32	24	2	8.55429e+09	8.36734e+09	8.10563e+09	9.8035e+09	9.44721e+09	8.82008e+09	1.05347e+10	9.56723e+09	9.62999e+09	Acetyl [N-Term]
High	High	Master Protein	P78527	DNA-dependent protein kinase catalytic subunit OS=Homo sapiens GN=PRKDC PE=1 SV=3	0	0	53	222	3604	222	1	4128	468.8	7.12	82702	3517.07	221	104	0	6.55313e+09	6.39089e+09	6.77031e+09	7.37556e+09	7.53936e+09	7.7086e+09	7.96635e+09	8.13179e+09	8.19774e+09
High	High	Master Protein	P07814	Bifunctional glutamate/proline--tRNA ligase OS=Homo sapiens GN=EPRS PE=1 SV=5	0	0	69	101	2638	100	1	1512	170.5	7.33	59994	3340.57	100	56	1	6.55447e+09	6.56507e+09	6.77487e+09	8.99654e+09	9.72896e+09	9.47116e+09	1.09802e+10	1.10927e+10	1.13706e+10	Acetyl [N-Term]
High	High	Master Protein	Q9Y490	Talin-1 OS=Homo sapiens GN=TLN1 PE=1 SV=3	0	0	68	142	2588	123	1	2541	269.6	6.07	61659	3284.37	141	81	20	2.4342e+09	2.31828e+09	2.46414e+09	3.14558e+09	3.33479e+09	3.30657e+09	3.54256e+09	3.6874e+09	3.79331e+09
High	High	Master Protein	Q9UM54	Unconventional myosin-VI OS=Homo sapiens GN=MYO6 PE=1 SV=4	0	0	69	95	2761	94	1	1294	149.6	8.53	66727	3228.6	94	50	1	8.09609e+09	8.07507e+09	8.43638e+09	1.06435e+10	1.07891e+10	1.07298e+10	1.13014e+10	1.11994e+10	1.1613e+10	Acetyl [N-Term]
High	High	Master Protein	Q15149	Plectin OS=Homo sapiens GN=PLEC PE=1 SV=3	0	0	66	325	3714	314	1	4684	531.5	5.96	86497	3167.81	325	135	12	4.41107e+09	4.31377e+09	4.53717e+09	5.31192e+09	5.69315e+09	5.54865e+09	5.88066e+09	6.14519e+09	6.23601e+09
High	High	Master Protein	P14625	Endoplasmin OS=Homo sapiens GN=HSP90B1 PE=1 SV=1	0	0	70	56	2419	54	1	803	92.4	4.84	48674	3129.48	56	29	0	1.1743e+10	1.10384e+10	1.14429e+10	1.37241e+10	1.44927e+10	1.31106e+10	1.51088e+10	1.46655e+10	1.48678e+10
High	High	Master Protein	Q14980	Nuclear mitotic apparatus protein 1 OS=Homo sapiens GN=NUMA1 PE=1 SV=2	0	0	73	150	2479	148	1	2115	238.1	5.78	60510	3111.16	148	87	2	3.54913e+09	3.33959e+09	3.58749e+09	4.50643e+09	4.83722e+09	4.76313e+09	4.63276e+09	4.70662e+09	4.80489e+09
High	High	Master Protein	P05783	Keratin, type I cytoskeletal 18 OS=Homo sapiens GN=KRT18 PE=1 SV=2	0	0	84	44	2128	42	1	430	48	5.45	54435	3097.64	44	17	2	1.03608e+10	9.81552e+09	1.0658e+10	1.22608e+10	1.30469e+10	1.25825e+10	1.26558e+10	1.28362e+10	1.32633e+10
High	High	Master Protein	P22314	Ubiquitin-like modifier-activating enzyme 1 OS=Homo sapiens GN=UBA1 PE=1 SV=3	0	0	66	55	1985	55	1	1058	117.8	5.76	43754	3051.14	54	41	0	5.27084e+09	5.33958e+09	5.30606e+09	6.48143e+09	6.94208e+09	6.94489e+09	7.20526e+09	7.45489e+09	7.27162e+09
High	High	Master Protein	P49588	Alanine--tRNA ligase, cytoplasmic OS=Homo sapiens GN=AARS PE=1 SV=2	0	0	69	57	2225	57	1	968	106.7	5.53	49428	3010.53	56	38	0	5.54448e+09	5.47754e+09	5.72166e+09	7.49241e+09	7.27895e+09	7.6795e+09	7.83091e+09	8.14875e+09	8.02731e+09	Acetyl [N-Term]
High	High	Master Protein Rejected	Q9NY65	Tubulin alpha-8 chain OS=Homo sapiens GN=TUBA8 PE=1 SV=1	0	0	34	16	2347	0	0	449	50.1	5.06	54373	2996.75	16	13	0
High	High	Master Protein	P68371	Tubulin beta-4B chain OS=Homo sapiens GN=TUBB4B PE=1 SV=1	0	0	82	33	3491	1	1	445	49.8	4.89	90516	2994.82	33	25	45	3.98212e+10	3.81494e+10	3.67659e+10	4.77217e+10	4.45181e+10	4.29508e+10	4.76332e+10	4.56703e+10	4.45324e+10	Acetyl [N-Term]
High	High	Master Protein	Q7Z6Z7	E3 ubiquitin-protein ligase HUWE1 OS=Homo sapiens GN=HUWE1 PE=1 SV=3	0	0	49	162	2347	162	1	4374	481.6	5.22	58719	2959.91	160	80	0	1.94068e+09	1.90498e+09	2.0092e+09	2.45651e+09	2.51727e+09	2.54955e+09	2.7504e+09	2.82959e+09	2.83364e+09
High	High	Master Protein	P21333	Filamin-A OS=Homo sapiens GN=FLNA PE=1 SV=4	0	0	69	144	2421	130	1	2647	280.6	6.06	55893	2931.01	141	89	4	3.32502e+09	3.27195e+09	3.41829e+09	4.51102e+09	4.50696e+09	4.6295e+09	4.89888e+09	4.98779e+09	5.1723e+09
High	High	Master Protein	P78371	T-complex protein 1 subunit beta OS=Homo sapiens GN=CCT2 PE=1 SV=4	0	0	83	41	1985	41	1	535	57.5	6.46	47063	2890.08	39	28	0	4.68377e+09	4.7217e+09	4.81296e+09	6.18525e+09	6.36477e+09	6.50625e+09	6.69455e+09	6.97687e+09	6.90825e+09	Acetyl [N-Term]
High	High	Master Protein	P55072	Transitional endoplasmic reticulum ATPase OS=Homo sapiens GN=VCP PE=1 SV=4	0	0	79	69	2284	69	1	806	89.3	5.26	52932	2785.29	69	45	0	8.5356e+09	8.87636e+09	9.44017e+09	1.15814e+10	1.20358e+10	1.2244e+10	1.2939e+10	1.31085e+10	1.31838e+10	Acetyl [N-Term]
High	High	Master Protein	P09651	Heterogeneous nuclear ribonucleoprotein A1 OS=Homo sapiens GN=HNRNPA1 PE=1 SV=5	0	0	67	30	2340	12	1	372	38.7	9.13	61876	2783.63	30	20	20	1.1589e+10	1.15945e+10	1.23332e+10	1.40049e+10	1.47048e+10	1.41312e+10	1.70557e+10	1.53635e+10	1.4924e+10
High	High	Master Protein	O43175	D-3-phosphoglycerate dehydrogenase OS=Homo sapiens GN=PHGDH PE=1 SV=4	0	0	60	28	1913	28	1	533	56.6	6.71	43413	2775.32	28	18	0	7.9482e+09	7.94579e+09	8.28509e+09	9.68284e+09	1.00784e+10	1.02126e+10	1.03455e+10	1.09369e+10	1.087e+10	Acetyl [N-Term]
High	High	Master Protein	P11142	Heat shock cognate 71 kDa protein OS=Homo sapiens GN=HSPA8 PE=1 SV=1	0	0	69	41	2546	36	1	646	70.9	5.52	59665	2771.56	38	24	4	3.04057e+10	3.04304e+10	3.22429e+10	3.82972e+10	3.947e+10	3.85891e+10	4.2265e+10	4.31741e+10	4.37101e+10
High	High	Master Protein	P13639	Elongation factor 2 OS=Homo sapiens GN=EEF2 PE=1 SV=4	0	0	73	68	2695	67	1	858	95.3	6.83	59889	2724.68	68	37	1	2.08964e+10	2.02731e+10	2.15291e+10	2.68299e+10	2.84424e+10	2.78183e+10	3.18213e+10	3.50376e+10	3.4251e+10	Acetyl [N-Term]
High	High	Master Protein	Q92616	eIF-2-alpha kinase activator GCN1 OS=Homo sapiens GN=GCN1 PE=1 SV=6	0	0	60	150	2463	150	1	2671	292.6	7.47	58388	2644.65	148	76	0	3.5791e+09	3.54766e+09	3.61229e+09	4.34468e+09	4.50936e+09	4.60857e+09	4.58846e+09	4.80368e+09	4.78376e+09	Acetyl [N-Term]
High	High	Master Protein	P58107	Epiplakin OS=Homo sapiens GN=EPPK1 PE=1 SV=2	0	0	71	153	2206	143	1	5090	555.3	5.6	50089	2634.1	151	81	0	2.47909e+09	2.5454e+09	2.53018e+09	2.49247e+09	2.58994e+09	2.60154e+09	3.14592e+09	3.20484e+09	3.21905e+09	Acetyl [N-Term]
High	High	Master Protein Rejected	Q9BVA1	Tubulin beta-2B chain OS=Homo sapiens GN=TUBB2B PE=1 SV=1	0	0	80	31	3011	0	0	445	49.9	4.89	77768	2597.39	31	23	0										Acetyl [N-Term]
High	High	Master Protein	P13929	Beta-enolase OS=Homo sapiens GN=ENO3 PE=1 SV=5	0	0	43	15	1585	7	1	434	47	7.71	36391	2589.67	15	7	0	9.67023e+06	9.91493e+06	1.20897e+07	15163667	1.95519e+07	17857863	1.47779e+07	14990902	1.82141e+07
High	High	Master Protein	Q13263	Transcription intermediary factor 1-beta OS=Homo sapiens GN=TRIM28 PE=1 SV=5	0	0	73	42	1853	42	1	835	88.5	5.77	42209	2577.75	41	26	0	6.71402e+09	6.79564e+09	6.7e+09	8.34942e+09	8.51844e+09	8.6092e+09	9.04176e+09	9.10498e+09	9.12854e+09	Acetyl [N-Term]
High	High	Master Protein	Q6S8J3	POTE ankyrin domain family member E OS=Homo sapiens GN=POTEE PE=2 SV=3	0	0	9	10	2174	1	1	1075	121.3	6.2	43938	2547.22	10	4	0
High	High	Master Protein	Q13885	Tubulin beta-2A chain OS=Homo sapiens GN=TUBB2A PE=1 SV=1	0	0	73	31	2968	5	1	445	49.9	4.89	77641	2546.3	31	23	1	3.60908e+07	4.07352e+07	3.75525e+07	9.12906e+07	5.09512e+07	5.21407e+07	8.61099e+07	101195628	6.343e+07	Acetyl [N-Term]
High	High	Master Protein	P04350	Tubulin beta-4A chain OS=Homo sapiens GN=TUBB4A PE=1 SV=2	0	0	82	30	3081	4	1	444	49.6	4.88	81971	2500.03	30	25	2	4.13951e+08	4.08479e+08	4.52407e+08	5.19221e+08	5.31828e+08	5.28494e+08	5.45137e+08	5.33587e+08	5.59335e+08	Acetyl [N-Term]
High	High	Master Protein	P49792	E3 SUMO-protein ligase RanBP2 OS=Homo sapiens GN=RANBP2 PE=1 SV=2	0	0	63	171	2413	136	1	3224	358	6.2	60007	2498.2	170	96	35	1.8852e+09	1.86804e+09	1.93293e+09	2.36796e+09	2.40847e+09	2.46857e+09	2.86215e+09	2.87991e+09	2.96212e+09
High	High	Master Protein	P11717	Cation-independent mannose-6-phosphate receptor OS=Homo sapiens GN=IGF2R PE=1 SV=3	0	0	59	125	2093	125	1	2491	274.2	5.94	47991	2448.42	123	68	0	3.68808e+09	3.65252e+09	3.67347e+09	4.25422e+09	4.41463e+09	4.45268e+09	5.10837e+09	5.02057e+09	4.9913e+09
High	High	Master Protein	Q13085	Acetyl-CoA carboxylase 1 OS=Homo sapiens GN=ACACA PE=1 SV=2	0	0	62	119	1885	104	1	2346	265.4	6.37	39757	2427.01	119	68	16	2.8592e+09	2.90065e+09	2.9035e+09	3.14569e+09	3.20951e+09	3.25857e+09	3.29803e+09	3.3587e+09	3.43361e+09	Acetyl [N-Term]
High	High	Master Protein	P09104	Gamma-enolase OS=Homo sapiens GN=ENO2 PE=1 SV=3	0	0	69	21	1456	14	1	434	47.2	5.03	33377	2387.41	21	14	3	2.13572e+08	2.04246e+08	2.22575e+08	2.76472e+08	2.97558e+08	2.79615e+08	3.15019e+08	3.09206e+08	3.41191e+08
High	High	Master Protein	P62258	14-3-3 protein epsilon OS=Homo sapiens GN=YWHAE PE=1 SV=1	0	0	80	25	2103	22	1	255	29.2	4.74	51084	2353.26	25	15	4	2.13188e+10	1.98959e+10	2.20163e+10	2.40983e+10	2.60113e+10	2.50232e+10	2.34826e+10	2.37619e+10	2.62222e+10	Acetyl [N-Term]
High	High	Master Protein	P34932	Heat shock 70 kDa protein 4 OS=Homo sapiens GN=HSPA4 PE=1 SV=4	0	0	81	69	2112	66	1	840	94.3	5.19	47442	2337.1	69	44	3	5.0449e+09	5.0485e+09	5.09439e+09	6.109e+09	6.52563e+09	6.28988e+09	7.05039e+09	6.83044e+09	6.86486e+09
High	High	Master Protein	Q14568	Heat shock protein HSP 90-alpha A2 OS=Homo sapiens GN=HSP90AA2P PE=1 SV=2	0	0	28	8	1395	1	1	343	39.3	4.65	25172	2279.75	7	6	0
High	High	Master Protein	P60842	Eukaryotic initiation factor 4A-I OS=Homo sapiens GN=EIF4A1 PE=1 SV=1	0	0	76	31	1707	14	1	406	46.1	5.48	38312	2224.86	30	16	19	1.05969e+10	1.04221e+10	1.13117e+10	1.21999e+10	1.31752e+10	1.349e+10	1.42563e+10	1.49272e+10	1.51984e+10
High	High	Master Protein	P38646	Stress-70 protein, mitochondrial OS=Homo sapiens GN=HSPA9 PE=1 SV=2	0	0	66	51	1710	51	1	679	73.6	6.16	43321	2178.66	49	27	0	5.16581e+09	4.99556e+09	5.23798e+09	6.60597e+09	6.78779e+09	6.99997e+09	8.67175e+09	8.62931e+09	8.55647e+09
High	High	Master Protein	P11021	78 kDa glucose-regulated protein OS=Homo sapiens GN=HSPA5 PE=1 SV=2	0	0	61	43	1887	41	1	654	72.3	5.16	44802	2132.78	43	26	2	1.45249e+10	1.23592e+10	1.30709e+10	1.49343e+10	1.59459e+10	1.62424e+10	1.84126e+10	1.67835e+10	1.7873e+10
High	High	Master Protein	P52272	Heterogeneous nuclear ribonucleoprotein M OS=Homo sapiens GN=HNRNPM PE=1 SV=3	0	0	72	49	2170	49	1	730	77.5	8.7	51256	2132.49	48	18	0	8.93534e+09	8.35451e+09	8.92415e+09	1.04182e+10	1.10927e+10	1.0951e+10	1.15221e+10	1.18437e+10	1.16506e+10	Acetyl [N-Term]
High	High	Master Protein	Q09666	Neuroblast differentiation-associated protein AHNAK OS=Homo sapiens GN=AHNAK PE=1 SV=2	0	0	63	201	2008	201	1	5890	628.7	6.15	44761	2119.44	196	95	0	1.5981e+09	1.53082e+09	1.53263e+09	1.71367e+09	1.74608e+09	1.78615e+09	1.76245e+09	1.83209e+09	1.81451e+09
High	High	Master Protein	Q00796	Sorbitol dehydrogenase OS=Homo sapiens GN=SORD PE=1 SV=4	0	0	79	30	1445	30	1	357	38.3	7.97	34093	2075.79	30	16	0	4.86924e+09	4.78518e+09	5.12984e+09	5.37273e+09	5.80912e+09	5.46105e+09	5.20585e+09	5.23538e+09	4.99368e+09	Acetyl [N-Term]
High	High	Master Protein	P21796	Voltage-dependent anion-selective channel protein 1 OS=Homo sapiens GN=VDAC1 PE=1 SV=2	0	0	73	20	1410	19	1	283	30.8	8.54	36232	2030.95	20	15	1	2.76614e+09	2.82082e+09	2.81763e+09	3.48765e+09	3.56758e+09	3.75213e+09	4.35648e+09	4.34345e+09	4.59224e+09	Acetyl [N-Term]
High	High	Master Protein	Q32P51	Heterogeneous nuclear ribonucleoprotein A1-like 2 OS=Homo sapiens GN=HNRNPA1L2 PE=2 SV=2	0	0	50	20	1709	2	1	320	34.2	9	43394	2027.96	20	14	0	7.23904e+06	8.20371e+06	7.56237e+06	8.56602e+06	1.01544e+07	8375979	4.53486e+06	3.59442e+06	4.18806e+06
High	High	Master Protein	O43707	Alpha-actinin-4 OS=Homo sapiens GN=ACTN4 PE=1 SV=2	0	0	74	66	1839	44	1	911	104.8	5.44	42989	2025.99	65	41	23	5.38046e+09	5.33405e+09	5.49236e+09	6.62201e+09	6.64052e+09	6.9239e+09	7.26025e+09	7.41715e+09	7.47813e+09
High	High	Master Protein	P00558	Phosphoglycerate kinase 1 OS=Homo sapiens GN=PGK1 PE=1 SV=3	0	0	75	31	1597	25	1	417	44.6	8.1	37612	2013.74	30	14	7	1.26348e+10	1.25175e+10	1.27409e+10	1.54273e+10	1.60859e+10	1.64519e+10	1.76206e+10	1.7862e+10	1.83262e+10
High	High	Master Protein	Q13813	Spectrin alpha chain, non-erythrocytic 1 OS=Homo sapiens GN=SPTAN1 PE=1 SV=3	0	0	67	165	1866	165	1	2472	284.4	5.35	43238	2010.92	164	82	0	1.56592e+09	1.53215e+09	1.57221e+09	2.05731e+09	2.10054e+09	2.16026e+09	2.01968e+09	2.09222e+09	2.10166e+09
High	High	Master Protein	P25705	ATP synthase subunit alpha, mitochondrial OS=Homo sapiens GN=ATP5A1 PE=1 SV=1	0	0	62	33	1539	33	1	553	59.7	9.13	40748	2006.11	33	18	0	7.47454e+09	7.16522e+09	7.19857e+09	9.74724e+09	1.00554e+10	1.04819e+10	1.15822e+10	1.25819e+10	1.24187e+10
High	High	Master Protein	P50851	Lipopolysaccharide-responsive and beige-like anchor protein OS=Homo sapiens GN=LRBA PE=1 SV=4	0	0	55	126	1882	117	1	2863	318.9	5.6	45346	2003.15	125	64	10	2.3181e+09	2.23711e+09	2.29264e+09	2.68797e+09	2.88205e+09	2.85779e+09	3.15169e+09	3.27659e+09	3.18226e+09	Acetyl [N-Term]
High	High	Master Protein	Q08211	ATP-dependent RNA helicase A OS=Homo sapiens GN=DHX9 PE=1 SV=4	0	0	54	56	1576	56	1	1270	140.9	6.84	35643	1978.87	56	33	0	3.87822e+09	3.81611e+09	3.82218e+09	4.90152e+09	5.0375e+09	4.96551e+09	5.21427e+09	5.35855e+09	5.6529e+09
High	High	Master Protein	Q9P2E9	Ribosome-binding protein 1 OS=Homo sapiens GN=RRBP1 PE=1 SV=4	0	0	72	96	1703	94	1	1410	152.4	8.6	42637	1957.17	96	50	2	1.40054e+09	1.39304e+09	1.48303e+09	1.85381e+09	1.91806e+09	1.98479e+09	2.32023e+09	2.29413e+09	2.31335e+09
High	High	Master Protein	Q14789	Golgin subfamily B member 1 OS=Homo sapiens GN=GOLGB1 PE=1 SV=2	0	0	65	169	1654	169	1	3259	375.8	5	38778	1934.84	164	92	0	9.46035e+08	9.5913e+08	9.8015e+08	1.21567e+09	1.36826e+09	1.44505e+09	1.25172e+09	1.29625e+09	1.3398e+09
High	High	Master Protein	P13010	X-ray repair cross-complementing protein 5 OS=Homo sapiens GN=XRCC5 PE=1 SV=3	0	0	65	45	1389	45	1	732	82.7	5.81	29077	1929.79	43	25	0	4.19395e+09	4.08733e+09	4.41421e+09	5.30261e+09	5.55803e+09	5.76886e+09	6.18566e+09	6.09361e+09	6.37771e+09
High	High	Master Protein	Q13509	Tubulin beta-3 chain OS=Homo sapiens GN=TUBB3 PE=1 SV=2	0	0	65	26	1850	7	1	450	50.4	4.93	42962	1929.58	26	19	2	1.04965e+08	9.51136e+07	9.7576e+07	1.25143e+08	1.26882e+08	1.26484e+08	1.33527e+08	1.36921e+08	1.34322e+08	Acetyl [N-Term]
High	High	Master Protein	P12270	Nucleoprotein TPR OS=Homo sapiens GN=TPR PE=1 SV=3	0	0	55	128	1853	127	1	2363	267.1	5.02	44164	1926.15	126	70	1	2.38543e+09	2.37334e+09	2.55362e+09	2.87991e+09	3.13362e+09	3.09322e+09	3.24433e+09	3.39157e+09	3.41784e+09	Acetyl [N-Term]
High	High	Master Protein	P29401	Transketolase OS=Homo sapiens GN=TKT PE=1 SV=3	0	0	76	37	1329	37	1	623	67.8	7.66	27585	1923.02	37	20	0	4.82259e+09	4.68217e+09	4.78668e+09	6.02678e+09	6.46522e+09	6.16252e+09	6.58283e+09	6.78333e+09	6.30748e+09	Acetyl [N-Term]
High	High	Master Protein	P60174	Triosephosphate isomerase OS=Homo sapiens GN=TPI1 PE=1 SV=3	0	0	71	19	1530	19	1	286	30.8	5.92	36153	1915.78	19	16	0	1.64806e+10	1.64138e+10	1.77321e+10	1.97981e+10	2.14811e+10	2.16623e+10	2.18128e+10	2.05542e+10	2.22686e+10
High	High	Master Protein	Q99832	T-complex protein 1 subunit eta OS=Homo sapiens GN=CCT7 PE=1 SV=2	0	0	69	37	1347	37	1	543	59.3	7.65	33383	1904.91	36	23	0	3.28385e+09	3.09903e+09	3.02746e+09	3.65231e+09	3.6554e+09	3.44573e+09	4.04456e+09	3.91267e+09	4.18387e+09	Acetyl [N-Term]
High	High	Master Protein	Q13228	Selenium-binding protein 1 OS=Homo sapiens GN=SELENBP1 PE=1 SV=2	0	0	83	34	1624	34	1	472	52.4	6.37	37036	1894.67	34	23	0	4.85857e+09	5.11135e+09	5.12356e+09	6.98556e+09	7.15329e+09	7.31044e+09	7.87371e+09	7.71875e+09	8.0542e+09
High	High	Master Protein	O75643	U5 small nuclear ribonucleoprotein 200 kDa helicase OS=Homo sapiens GN=SNRNP200 PE=1 SV=2	0	0	54	114	1685	114	1	2136	244.4	6.06	38199	1893.24	113	59	0	2.29679e+09	2.32482e+09	2.41727e+09	2.83336e+09	3.04158e+09	3.06992e+09	3.06694e+09	3.22364e+09	3.19909e+09
High	High	Master Protein	Q12906	Interleukin enhancer-binding factor 3 OS=Homo sapiens GN=ILF3 PE=1 SV=3	0	0	72	53	1936	47	1	894	95.3	8.76	43899	1886.58	53	31	7	5.33898e+09	4.97179e+09	5.2061e+09	5.89928e+09	6.55629e+09	6.22831e+09	6.82652e+09	6.60188e+09	6.8635e+09
High	High	Master Protein	P04075	Fructose-bisphosphate aldolase A OS=Homo sapiens GN=ALDOA PE=1 SV=2	0	0	86	33	1479	28	1	364	39.4	8.09	31236	1884	32	22	5	1.07629e+10	1.10053e+10	1.11831e+10	1.25088e+10	1.40248e+10	1.42227e+10	1.36479e+10	1.57206e+10	1.48235e+10	Acetyl [N-Term]
High	High	Master Protein	P52597	Heterogeneous nuclear ribonucleoprotein F OS=Homo sapiens GN=HNRNPF PE=1 SV=3	0	0	67	20	1254	18	1	415	45.6	5.58	30605	1854.36	20	11	0	2.8379e+09	2.75023e+09	2.86185e+09	3.52871e+09	3.48472e+09	3.45807e+09	3.34023e+09	3.2765e+09	3.26148e+09	Acetyl [N-Term; N-Term]
High	High	Master Protein	P06576	ATP synthase subunit beta, mitochondrial OS=Homo sapiens GN=ATP5B PE=1 SV=3	0	0	75	27	1508	27	1	529	56.5	5.4	35453	1849.63	27	20	0	6.68649e+09	6.61216e+09	6.66553e+09	8.30657e+09	8.76782e+09	9.14684e+09	1.04188e+10	1.03223e+10	1.08571e+10
High	High	Master Protein	Q9C0C2	182 kDa tankyrase-1-binding protein OS=Homo sapiens GN=TNKS1BP1 PE=1 SV=4	0	0	78	97	1433	97	1	1729	181.7	4.86	34739	1845.33	95	59	0	8.64034e+08	8.64007e+08	9.13539e+08	1.14453e+09	1.17972e+09	1.24067e+09	1.23817e+09	1.31079e+09	1.35178e+09
High	High	Master Protein	O15020	Spectrin beta chain, non-erythrocytic 2 OS=Homo sapiens GN=SPTBN2 PE=1 SV=3	0	0	60	125	1552	115	1	2390	271.2	6.11	36332	1837.22	125	66	10	1.27482e+09	1.2231e+09	1.23957e+09	1.52218e+09	1.62221e+09	1.57974e+09	1.66447e+09	1.69413e+09	1.67766e+09
High	High	Master Protein	P06748	Nucleophosmin OS=Homo sapiens GN=NPM1 PE=1 SV=2	0	0	65	19	1620	19	1	294	32.6	4.78	36938	1835.34	19	10	0	1.24362e+10	1.30075e+10	1.31187e+10	1.60714e+10	2.0476e+10	1.77004e+10	1.8326e+10	1.94577e+10	1.99965e+10	Acetyl [N-Term]
High	High	Master Protein	Q13011	Delta(3,5)-Delta(2,4)-dienoyl-CoA isomerase, mitochondrial OS=Homo sapiens GN=ECH1 PE=1 SV=2	0	0	74	18	1089	18	1	328	35.8	8	24259	1831.6	18	11	0	2.64692e+09	2.67533e+09	2.6475e+09	3.54564e+09	3.44003e+09	3.50128e+09	4.28068e+09	4.16933e+09	4.38231e+09
High	High	Master Protein	Q96KP4	Cytosolic non-specific dipeptidase OS=Homo sapiens GN=CNDP2 PE=1 SV=2	0	0	77	35	1421	35	1	475	52.8	5.97	31791	1823.94	35	24	0	6.38306e+09	6.14417e+09	6.17352e+09	7.75657e+09	7.83338e+09	7.82793e+09	7.92398e+09	8.12497e+09	8.39744e+09	Acetyl [N-Term]
High	High	Master Protein	P15924	Desmoplakin OS=Homo sapiens GN=DSP PE=1 SV=3	0	0	64	190	1932	189	1	2871	331.6	6.81	42350	1754.26	189	67	1	2.34611e+09	2.22041e+09	2.3091e+09	2.82722e+09	2.96348e+09	2.92603e+09	2.818e+09	2.88468e+09	2.87123e+09	Acetyl [N-Term]
High	High	Master Protein	P22626	Heterogeneous nuclear ribonucleoproteins A2/B1 OS=Homo sapiens GN=HNRNPA2B1 PE=1 SV=2	0	0	73	30	1842	28	1	353	37.4	8.95	51084	1744.17	29	20	0	1.4611e+10	1.53063e+10	1.44206e+10	1.56742e+10	1.6636e+10	1.77939e+10	1.8279e+10	1.92191e+10	1.75549e+10
High	High	Master Protein	P09874	Poly [ADP-ribose] polymerase 1 OS=Homo sapiens GN=PARP1 PE=1 SV=4	0	0	58	67	1446	67	1	1014	113	8.88	33518	1740.42	66	34	0	5.34512e+09	5.12352e+09	5.3591e+09	5.82143e+09	5.99911e+09	6.29387e+09	6.03862e+09	6.18503e+09	6.18066e+09
High	High	Master Protein	P12268	Inosine-5'-monophosphate dehydrogenase 2 OS=Homo sapiens GN=IMPDH2 PE=1 SV=2	0	0	57	33	1104	31	1	514	55.8	6.9	24739	1738.93	33	21	2	3.15833e+09	3.10903e+09	3.16093e+09	3.53755e+09	3.84034e+09	4.05293e+09	4.68631e+09	4.84653e+09	4.74259e+09
High	High	Master Protein	Q7Z406	Myosin-14 OS=Homo sapiens GN=MYH14 PE=1 SV=2	0	0	56	111	1467	96	1	1995	227.7	5.6	36592	1737.99	111	60	1	6.21321e+08	6.0803e+08	6.21964e+08	7.81757e+08	8.11063e+08	8.49346e+08	9.35856e+08	9.99904e+08	1.00962e+09	Acetyl [N-Term]
High	High	Master Protein	P05023	Sodium/potassium-transporting ATPase subunit alpha-1 OS=Homo sapiens GN=ATP1A1 PE=1 SV=1	0	0	50	52	1406	32	1	1023	112.8	5.49	33170	1717.94	52	25	26	3.03984e+09	2.82476e+09	2.96313e+09	3.57358e+09	3.66055e+09	3.52153e+09	4.52034e+09	4.54318e+09	4.6041e+09
High	High	Master Protein	Q15365	Poly(rC)-binding protein 1 OS=Homo sapiens GN=PCBP1 PE=1 SV=2	0	0	85	19	1222	14	1	356	37.5	7.09	27896	1710.17	19	13	0	2.24504e+09	2.15106e+09	2.37091e+09	2.9811e+09	2.91966e+09	3.04046e+09	2.80763e+09	2.96616e+09	2.9943e+09
High	High	Master Protein	Q9UPN3	Microtubule-actin cross-linking factor 1, isoforms 1/2/3/5 OS=Homo sapiens GN=MACF1 PE=1 SV=4	0	0	35	206	1595	198	1	7388	837.8	5.39	36004	1696.29	201	99	7	6.45795e+08	6.17756e+08	6.29402e+08	7.73664e+08	8.0645e+08	7.90839e+08	7.87361e+08	8.27777e+08	8.06346e+08
High	High	Master Protein	P35221	Catenin alpha-1 OS=Homo sapiens GN=CTNNA1 PE=1 SV=1	0	0	66	50	1180	36	1	906	100	6.29	27642	1666.58	50	35	15	1.91742e+09	1.83995e+09	1.84436e+09	2.43842e+09	2.33148e+09	2.49126e+09	1.91167e+09	1.95437e+09	1.96143e+09	Acetyl [N-Term]
High	High	Master Protein	Q14974	Importin subunit beta-1 OS=Homo sapiens GN=KPNB1 PE=1 SV=2	0	0	53	41	1206	41	1	876	97.1	4.78	26745	1646.78	41	27	0	3.89054e+09	3.65477e+09	3.77729e+09	4.38483e+09	4.6046e+09	4.1934e+09	4.50967e+09	4.49096e+09	4.46057e+09	Acetyl [N-Term]
High	High	Master Protein	P50991	T-complex protein 1 subunit delta OS=Homo sapiens GN=CCT4 PE=1 SV=4	0	0	74	37	1286	36	1	539	57.9	7.83	28360	1633.31	36	24	0	3.56898e+09	3.36611e+09	3.50372e+09	4.42931e+09	4.39613e+09	4.56523e+09	4.60084e+09	4.81335e+09	4.85169e+09
High	High	Master Protein	P07954	Fumarate hydratase, mitochondrial OS=Homo sapiens GN=FH PE=1 SV=3	0	0	56	19	885	19	1	510	54.6	8.76	21290	1632.97	19	12	0	1.79366e+09	1.72936e+09	1.84073e+09	2.00268e+09	2.17035e+09	2.14551e+09	2.80628e+09	2.81822e+09	2.8007e+09
High	High	Master Protein	P51659	Peroxisomal multifunctional enzyme type 2 OS=Homo sapiens GN=HSD17B4 PE=1 SV=3	0	0	62	39	1129	39	1	736	79.6	8.84	27665	1622.35	38	26	0	1885065028	1.81825e+09	1969755275	2.18816e+09	2.28032e+09	2.26535e+09	2.42603e+09	2.52155e+09	2.55657e+09
High	High	Master Protein	P46939	Utrophin OS=Homo sapiens GN=UTRN PE=1 SV=2	0	0	52	158	1625	157	1	3433	394.2	5.33	38298	1610.39	157	76	1	1.32943e+09	1.29342e+09	1.36329e+09	1.4969e+09	1.58589e+09	1.58476e+09	1.69846e+09	1.76119e+09	1.7222e+09
High	High	Master Protein	P41252	Isoleucine--tRNA ligase, cytoplasmic OS=Homo sapiens GN=IARS PE=1 SV=2	0	0	57	57	1203	57	1	1262	144.4	6.15	25619	1607.87	57	30	0	2.19507e+09	2.11761e+09	2.24677e+09	2.89477e+09	2.98959e+09	3.1315e+09	3.1144e+09	3.20367e+09	3191418585	Acetyl [N-Term]
High	High	Master Protein	P05787	Keratin, type II cytoskeletal 8 OS=Homo sapiens GN=KRT8 PE=1 SV=7	0	0	78	46	1555	35	1	483	53.7	5.59	36328	1576.36	46	23	12	1.07436e+10	1.06852e+10	1.08846e+10	1.32134e+10	1.3612e+10	1.40469e+10	1.33642e+10	1.37895e+10	13684229758
High	High	Master Protein	P51991	Heterogeneous nuclear ribonucleoprotein A3 OS=Homo sapiens GN=HNRNPA3 PE=1 SV=2	0	0	65	32	1105	30	1	378	39.6	9.01	30065	1566.91	32	16	2	4.06995e+09	3.86268e+09	4.28202e+09	5.31612e+09	4.77371e+09	5.41032e+09	5.47776e+09	6.17667e+09	5.87636e+09	Acetyl [N-Term]
High	High	Master Protein	Q00839	Heterogeneous nuclear ribonucleoprotein U OS=Homo sapiens GN=HNRNPU PE=1 SV=6	0	0	53	41	1339	40	1	825	90.5	6	30472	1552.15	40	23	2	7.30695e+09	7.13911e+09	7.14197e+09	9.03594e+09	9.89396e+09	9.08779e+09	9.94744e+09	1.03994e+10	1.00527e+10	Acetyl [N-Term]
High	High	Master Protein	P48643	T-complex protein 1 subunit epsilon OS=Homo sapiens GN=CCT5 PE=1 SV=1	0	0	75	40	1242	39	1	541	59.6	5.66	25850	1543.82	40	22	1	3.87299e+09	3.79553e+09	4.19802e+09	4.82296e+09	4.94644e+09	4.96535e+09	5.61622e+09	5.66018e+09	5.81525e+09	Acetyl [N-Term]
High	High	Master Protein	P22102	Trifunctional purine biosynthetic protein adenosine-3 OS=Homo sapiens GN=GART PE=1 SV=1	0	0	65	48	1149	48	1	1010	107.7	6.7	24519	1543.41	48	33	0	1.85911e+09	1.91924e+09	1.91501e+09	2.17641e+09	2.4184e+09	2.29188e+09	2.48574e+09	2.61765e+09	2.63723e+09
High	High	Master Protein	P30101	Protein disulfide-isomerase A3 OS=Homo sapiens GN=PDIA3 PE=1 SV=4	0	0	66	36	1420	35	1	505	56.7	6.35	36266	1505.99	36	22	0	9.51607e+09	9.38604e+09	9.76042e+09	1.17453e+10	1.14277e+10	1.13086e+10	1.2103e+10	1.21858e+10	1.24583e+10
High	High	Master Protein	P49736	DNA replication licensing factor MCM2 OS=Homo sapiens GN=MCM2 PE=1 SV=4	0	0	59	46	1183	46	1	904	101.8	5.52	27938	1499.36	46	29	0	1.44561e+09	1.40718e+09	1.4116e+09	1.51372e+09	1.60113e+09	1.65152e+09	1.64299e+09	1.64862e+09	1.61693e+09	Acetyl [N-Term]
High	High	Master Protein	P12814	Alpha-actinin-1 OS=Homo sapiens GN=ACTN1 PE=1 SV=2	0	0	74	57	1325	36	1	892	103	5.41	29244	1498.61	57	32	0	7.42706e+08	7.92325e+08	8.16362e+08	8.83635e+08	9.15232e+08	8.78061e+08	1.00401e+09	1.00606e+09	1.00123e+09	Acetyl [N-Term]
High	High	Master Protein	P33176	Kinesin-1 heavy chain OS=Homo sapiens GN=KIF5B PE=1 SV=1	0	0	73	73	1281	58	1	963	109.6	6.51	29343	1495.26	72	43	16	2.32227e+09	2.25742e+09	2.27307e+09	2.88733e+09	2.98307e+09	2.89607e+09	2.8884e+09	3.07687e+09	3.00197e+09	Acetyl [N-Term]
High	High	Master Protein	P31943	Heterogeneous nuclear ribonucleoprotein H OS=Homo sapiens GN=HNRNPH1 PE=1 SV=4	0	0	58	23	1172	13	1	449	49.2	6.3	29108	1488.15	22	14	12	3.90591e+09	3.73319e+09	3.88826e+09	4.55865e+09	4.70533e+09	4.76881e+09	4.56339e+09	4.67512e+09	4.62539e+09	Acetyl [N-Term; N-Term]
High	High	Master Protein	Q9P2J5	Leucine--tRNA ligase, cytoplasmic OS=Homo sapiens GN=LARS PE=1 SV=2	0	0	63	75	1305	75	1	1176	134.4	7.3	28177	1484.07	74	39	0	2.29424e+09	2.19242e+09	2283185024	2.86597e+09	3.00858e+09	2.90172e+09	3.18331e+09	3.16788e+09	3.25041e+09
High	High	Master Protein	P43243	Matrin-3 OS=Homo sapiens GN=MATR3 PE=1 SV=2	0	0	66	60	1359	60	1	847	94.6	6.25	28841	1475.91	59	34	0	3.9805e+09	3.76079e+09	3.84012e+09	4.36556e+09	5.00237e+09	4.96711e+09	5.76303e+09	5.88418e+09	5.22842e+09
High	High	Master Protein	P23528	Cofilin-1 OS=Homo sapiens GN=CFL1 PE=1 SV=3	0	0	81	18	1077	13	1	166	18.5	8.09	23245	1470.43	18	9	6	1.06448e+10	1.03606e+10	1.01902e+10	1.28553e+10	1.33319e+10	1.32945e+10	1.44752e+10	14423552123	1.41609e+10	Acetyl [N-Term]
High	High	Master Protein	Q5JRA6	Melanoma inhibitory activity protein 3 OS=Homo sapiens GN=MIA3 PE=1 SV=1	0	0	59	102	1302	102	1	1907	213.6	4.84	28192	1438.6	100	51	0	9.42387e+08	9.22397e+08	9.787e+08	1.14904e+09	1.20534e+09	1.18678e+09	1.48677e+09	1.56248e+09	1.5354e+09
High	High	Master Protein	P50990	T-complex protein 1 subunit theta OS=Homo sapiens GN=CCT8 PE=1 SV=4	0	0	74	42	1395	42	1	548	59.6	5.6	35920	1426.38	42	30	0	6.17422e+09	5.81193e+09	6.17153e+09	7.23399e+09	7.73554e+09	8.15161e+09	7.63274e+09	7.86152e+09	8.28688e+09
High	High	Master Protein	Q8WUY3	Protein prune homolog 2 OS=Homo sapiens GN=PRUNE2 PE=1 SV=3	0	0	53	105	1131	104	1	3088	340.4	4.45	24482	1420.19	102	70	1	5.50113e+08	5.35708e+08	5.43732e+08	7.80801e+08	8.30789e+08	8.33177e+08	7.9448e+08	8.39142e+08	8.79701e+08	Acetyl [N-Term]
High	High	Master Protein	Q13435	Splicing factor 3B subunit 2 OS=Homo sapiens GN=SF3B2 PE=1 SV=2	0	0	59	58	1160	58	1	895	100.2	5.67	27313	1417.41	58	31	0	1.67143e+09	1.56958e+09	1.65638e+09	2.03863e+09	2.06847e+09	2.15003e+09	2.18329e+09	2.23563e+09	2.22266e+09	Acetyl [N-Term]
High	High	Master Protein	P46940	Ras GTPase-activating-like protein IQGAP1 OS=Homo sapiens GN=IQGAP1 PE=1 SV=1	0	0	62	91	1254	89	1	1657	189.1	6.48	28776	1415.85	89	49	2	1.1171e+09	1.07819e+09	1.13426e+09	1.33889e+09	1.38835e+09	1.3632e+09	1.53909e+09	1.55841e+09	1.62226e+09	Acetyl [N-Term]
High	High	Master Protein	P0DMV9	Heat shock 70 kDa protein 1B OS=Homo sapiens GN=HSPA1B PE=1 SV=1	0	0	60	34	1225	21	1	641	70	5.66	29410	1413.18	34	19	11	5.21645e+09	5.14546e+09	5.14172e+09	6.6556e+09	7.14917e+09	7.20109e+09	7.79883e+09	8.03366e+09	8.12711e+09
High	High	Master Protein	Q08378	Golgin subfamily A member 3 OS=Homo sapiens GN=GOLGA3 PE=1 SV=2	0	0	67	87	1090	87	1	1498	167.3	5.44	24837	1412.67	85	56	0	6.50953e+08	6.12404e+08	6.48931e+08	8.54783e+08	9.37185e+08	9.36445e+08	9.76816e+08	9.80874e+08	9.93478e+08	Acetyl [N-Term]
High	High	Master Protein	Q6P2Q9	Pre-mRNA-processing-splicing factor 8 OS=Homo sapiens GN=PRPF8 PE=1 SV=2	0	0	56	118	1479	118	1	2335	273.4	8.84	31644	1409.88	115	46	0	2.08483e+09	2.01688e+09	2.10487e+09	2.43082e+09	2.52574e+09	2.64126e+09	2.74051e+09	2.85064e+09	2.78538e+09	Acetyl [N-Term]
High	High	Master Protein	P53396	ATP-citrate synthase OS=Homo sapiens GN=ACLY PE=1 SV=3	0	0	61	70	1395	70	1	1101	120.8	7.33	33260	1409.15	67	35	0	4.55886e+09	4.58793e+09	4.6213e+09	5.59732e+09	5.61276e+09	5.6946e+09	5.93267e+09	6.17278e+09	5.90451e+09
High	High	Master Protein	Q04637	Eukaryotic translation initiation factor 4 gamma 1 OS=Homo sapiens GN=EIF4G1 PE=1 SV=4	0	0	54	83	1659	77	1	1599	175.4	5.33	40076	1408.29	83	38	10	4.11876e+09	4.12092e+09	4.21941e+09	5.60173e+09	5.82723e+09	5.64829e+09	6.30711e+09	6.62701e+09	6.49485e+09
High	High	Master Protein	Q99460	26S proteasome non-ATPase regulatory subunit 1 OS=Homo sapiens GN=PSMD1 PE=1 SV=2	0	0	60	51	1278	51	1	953	105.8	5.39	31293	1404.66	50	30	0	1.80602e+09	1.76552e+09	1.86471e+09	2.30971e+09	2.47486e+09	2.42406e+09	2.41801e+09	2.49105e+09	2.51856e+09	Acetyl [N-Term]
High	High	Master Protein	P53618	Coatomer subunit beta OS=Homo sapiens GN=COPB1 PE=1 SV=3	0	0	65	57	1143	57	1	953	107.1	6.05	27077	1400.35	56	37	0	1.53016e+09	1.47777e+09	1.50784e+09	2.00527e+09	2.03589e+09	1.98841e+09	2.01746e+09	1.97539e+09	2.09478e+09	Acetyl [N-Term]
High	High	Master Protein	Q15393	Splicing factor 3B subunit 3 OS=Homo sapiens GN=SF3B3 PE=1 SV=4	0	0	50	49	1153	49	1	1217	135.5	5.26	27251	1395.03	49	27	0	1.75277e+09	1.65386e+09	1.71755e+09	2.04211e+09	2.09574e+09	2.20038e+09	2.40861e+09	2.29641e+09	2.41498e+09
High	High	Master Protein	Q15366	Poly(rC)-binding protein 2 OS=Homo sapiens GN=PCBP2 PE=1 SV=1	0	0	81	19	1059	12	1	365	38.6	6.79	24957	1391.61	19	11	11	4.09414e+09	4.33079e+09	4.47214e+09	5.33812e+09	5.63844e+09	5.42021e+09	5.82556e+09	6.01999e+09	6.18526e+09	Acetyl [N-Term]
High	High	Master Protein	Q13200	26S proteasome non-ATPase regulatory subunit 2 OS=Homo sapiens GN=PSMD2 PE=1 SV=3	0	0	69	54	1277	54	1	908	100.1	5.2	27981	1389.15	53	29	0	2.79242e+09	2.72758e+09	2.88533e+09	3.6047e+09	3.67171e+09	3.87707e+09	3.70257e+09	3.84227e+09	4.05447e+09	Acetyl [N-Term]
High	High	Master Protein	P13667	Protein disulfide-isomerase A4 OS=Homo sapiens GN=PDIA4 PE=1 SV=2	0	0	65	50	1282	49	1	645	72.9	5.07	29916	1371.75	49	28	1	3.77666e+09	3.67227e+09	3.76917e+09	4.44321e+09	4.51187e+09	4.30098e+09	4.47596e+09	4.69409e+09	4.79689e+09
High	High	Master Protein	P17858	ATP-dependent 6-phosphofructokinase, liver type OS=Homo sapiens GN=PFKL PE=1 SV=6	0	0	59	37	913	33	1	780	85	7.5	21172	1366.75	36	21	0	1.05886e+09	1.02759e+09	1.10556e+09	1.26659e+09	1.38629e+09	1.31737e+09	1.39601e+09	1.46251e+09	1.41936e+09
High	High	Master Protein	Q14203	Dynactin subunit 1 OS=Homo sapiens GN=DCTN1 PE=1 SV=3	0	0	63	71	1065	71	1	1278	141.6	5.81	25284	1356.63	71	41	0	9.44571e+08	9.37251e+08	9.13873e+08	1.17151e+09	1.22752e+09	1.26162e+09	1.29408e+09	1.36825e+09	1.36816e+09
High	High	Master Protein	P18206	Vinculin OS=Homo sapiens GN=VCL PE=1 SV=4	0	0	73	85	1336	85	1	1134	123.7	5.66	30143	1350.49	85	40	0	2.69601e+09	2.67543e+09	2.66441e+09	3.13948e+09	3.25931e+09	3.35483e+09	3.48537e+09	3.56593e+09	3.70086e+09
High	High	Master Protein	Q92598	Heat shock protein 105 kDa OS=Homo sapiens GN=HSPH1 PE=1 SV=1	0	0	74	54	1157	50	1	858	96.8	5.39	25807	1350.07	54	35	2	1.7307e+09	1.77595e+09	1.7794e+09	2.23247e+09	2.38755e+09	2.33367e+09	2.60134e+09	2.56827e+09	2.58835e+09	Acetyl [N-Term]
High	High	Master Protein	Q15233	Non-POU domain-containing octamer-binding protein OS=Homo sapiens GN=NONO PE=1 SV=4	0	0	64	36	1449	30	1	471	54.2	8.95	35625	1344.04	36	11	4	4.33498e+09	4.19001e+09	4.34136e+09	5.68622e+09	5.40357e+09	5.44058e+09	6.00281e+09	6.23546e+09	6.14198e+09
High	High	Master Protein	P20700	Lamin-B1 OS=Homo sapiens GN=LMNB1 PE=1 SV=2	0	0	76	55	1452	51	1	586	66.4	5.16	38203	1335.8	54	29	3	5.55899e+09	5.36855e+09	5.52758e+09	6.17983e+09	6.53738e+09	6.44991e+09	6.83329e+09	7.36882e+09	7.04736e+09	Acetyl [N-Term]
High	High	Master Protein	P42704	Leucine-rich PPR motif-containing protein, mitochondrial OS=Homo sapiens GN=LRPPRC PE=1 SV=3	0	0	66	79	1309	78	1	1394	157.8	6.13	31685	1333.66	79	36	1	2.26979e+09	2.32099e+09	2.35018e+09	2.87041e+09	2.99903e+09	2.94029e+09	3.5867e+09	3.68877e+09	3.9101e+09
High	High	Master Protein	P49748	Very long-chain specific acyl-CoA dehydrogenase, mitochondrial OS=Homo sapiens GN=ACADVL PE=1 SV=1	0	0	67	40	1064	40	1	655	70.3	8.75	25463	1328.7	39	25	0	2.02384e+09	1.97613e+09	2.07662e+09	2.8706e+09	2.93982e+09	3.00099e+09	3.42974e+09	3.35699e+09	3.51804e+09
High	High	Master Protein	P26599	Polypyrimidine tract-binding protein 1 OS=Homo sapiens GN=PTBP1 PE=1 SV=1	0	0	66	23	1087	21	1	531	57.2	9.17	23713	1320.46	23	15	3	3.27582e+09	3.25122e+09	3.30753e+09	4.12897e+09	4.50312e+09	4.6144e+09	4.13957e+09	4.25825e+09	4.59854e+09	Acetyl [N-Term]
High	High	Master Protein	P26640	Valine--tRNA ligase OS=Homo sapiens GN=VARS PE=1 SV=4	0	0	56	64	1338	64	1	1264	140.4	7.59	33097	1305.79	64	35	0	3.05457e+09	2.91886e+09	3.06177e+09	3.72499e+09	4.02273e+09	4.09895e+09	4.44382e+09	4.41605e+09	4.48957e+09	Acetyl [N-Term]
High	High	Master Protein	Q12955	Ankyrin-3 OS=Homo sapiens GN=ANK3 PE=1 SV=3	0	0	28	96	1212	96	1	4377	480.1	6.49	27777	1293.1	92	53	0	9.14472e+08	9.09278e+08	9.17121e+08	1.37676e+09	1.39634e+09	1.36624e+09	1.36155e+09	1.36442e+09	1.34838e+09
High	High	Master Protein	Q86UP2	Kinectin OS=Homo sapiens GN=KTN1 PE=1 SV=1	0	0	66	93	1246	92	1	1357	156.2	5.64	28336	1285.24	91	47	1	1.51214e+09	1.46097e+09	1.51699e+09	1.95537e+09	1.98326e+09	1.98372e+09	2.44197e+09	2.51024e+09	2.55176e+09
High	High	Master Protein	Q99714	3-hydroxyacyl-CoA dehydrogenase type-2 OS=Homo sapiens GN=HSD17B10 PE=1 SV=3	0	0	80	16	713	16	1	261	26.9	7.78	16609	1284.18	16	12	0	6.96715e+08	7.31638e+08	7.50761e+08	9.38832e+08	9.05953e+08	9.6653e+08	1.23984e+09	1.33645e+09	1.30134e+09
High	High	Master Protein	Q14157	Ubiquitin-associated protein 2-like OS=Homo sapiens GN=UBAP2L PE=1 SV=2	0	0	48	35	895	35	1	1087	114.5	7.11	17996	1271.89	35	24	0	1373563070	1.32788e+09	1.38064e+09	1.6722e+09	1.74149e+09	1.72303e+09	1.85832e+09	1.88655e+09	1.85509e+09	Acetyl [N-Term]
High	High	Master Protein	P14923	Junction plakoglobin OS=Homo sapiens GN=JUP PE=1 SV=3	0	0	67	39	1014	34	1	745	81.7	6.14	26014	1267.94	39	21	6	1.37774e+09	1.32573e+09	1.36599e+09	1.64282e+09	1.71563e+09	1.71592e+09	1.74813e+09	1.70706e+09	1.75105e+09	Acetyl [N-Term]
High	High	Master Protein	P50395	Rab GDP dissociation inhibitor beta OS=Homo sapiens GN=GDI2 PE=1 SV=2	0	0	79	35	1118	24	1	445	50.6	6.47	25605	1265.14	35	23	13	4.38428e+09	4.15548e+09	4.28236e+09	5.04918e+09	5.09626e+09	5.16848e+09	5.62878e+09	5.81621e+09	5.73104e+09
High	High	Master Protein	P53621	Coatomer subunit alpha OS=Homo sapiens GN=COPA PE=1 SV=2	0	0	64	70	1162	70	1	1224	138.3	7.66	26310	1250.08	69	39	0	2.45876e+09	2.45775e+09	2.47361e+09	3.33461e+09	3.11221e+09	3.19995e+09	3.20593e+09	3281871938	3.27767e+09
High	High	Master Protein	Q8WUM4	Programmed cell death 6-interacting protein OS=Homo sapiens GN=PDCD6IP PE=1 SV=1	0	0	62	57	1030	57	1	868	96	6.52	24510	1248.98	56	22	0	2.01473e+09	2.00265e+09	2.05569e+09	2.48311e+09	2.69173e+09	2.59198e+09	2.72646e+09	2.88608e+09	2.94302e+09	Acetyl [N-Term]
High	High	Master Protein	P31939	Bifunctional purine biosynthesis protein PURH OS=Homo sapiens GN=ATIC PE=1 SV=3	0	0	79	41	1047	41	1	592	64.6	6.71	22422	1248.97	41	22	0	2.37062e+09	2.32337e+09	2.36993e+09	3.03829e+09	3.07535e+09	3.1242e+09	3.4083e+09	3.47036e+09	3.4152e+09	Acetyl [N-Term]
High	High	Master Protein	P25205	DNA replication licensing factor MCM3 OS=Homo sapiens GN=MCM3 PE=1 SV=3	0	0	69	56	1098	56	1	808	90.9	5.77	25581	1236.08	54	29	0	1.80133e+09	1.65893e+09	1.78526e+09	1.77026e+09	2.02089e+09	1.89573e+09	1.73665e+09	1.85507e+09	1.82058e+09	Acetyl [N-Term]
High	High	Master Protein	P17987	T-complex protein 1 subunit alpha OS=Homo sapiens GN=TCP1 PE=1 SV=1	0	0	78	37	1083	37	1	556	60.3	6.11	26181	1232.79	36	21	0	4.05755e+09	3.81519e+09	4.06064e+09	4.65751e+09	4.94279e+09	4.63866e+09	4.94137e+09	5.06269e+09	4.85421e+09	Acetyl [N-Term]
High	High	Master Protein	P12956	X-ray repair cross-complementing protein 6 OS=Homo sapiens GN=XRCC6 PE=1 SV=2	0	0	66	46	1216	46	1	609	69.8	6.64	26779	1232.11	46	26	0	5.95605e+09	5.78773e+09	5.8959e+09	6.9958e+09	7.21619e+09	7.46698e+09	6.85334e+09	6.92129e+09	7.06943e+09	Acetyl [N-Term]
High	High	Master Protein	P33991	DNA replication licensing factor MCM4 OS=Homo sapiens GN=MCM4 PE=1 SV=5	0	0	65	49	925	48	1	863	96.5	6.74	19582	1227.63	48	31	1	1.35813e+09	1.37026e+09	1.42526e+09	1.41641e+09	1.45327e+09	1.53562e+09	1.41785e+09	1.48964e+09	1.39245e+09	Acetyl [N-Term]
High	High	Master Protein	Q9UQ35	Serine/arginine repetitive matrix protein 2 OS=Homo sapiens GN=SRRM2 PE=1 SV=2	0	0	36	76	1052	76	1	2752	299.4	12.06	24589	1219.7	75	36	0	9.27484e+08	8.94166e+08	9.4813e+08	1.4031e+09	1.4305e+09	1.47634e+09	1.43934e+09	1.52364e+09	1.55903e+09	Acetyl [N-Term]
High	High	Master Protein	P67809	Nuclease-sensitive element-binding protein 1 OS=Homo sapiens GN=YBX1 PE=1 SV=3	0	0	74	28	1466	23	1	324	35.9	9.88	39557	1212.94	28	17	5	3.46652e+09	3.46945e+09	3.15902e+09	4.24699e+09	4.47319e+09	4.4803e+09	5.06002e+09	4.65013e+09	4.37425e+09	Acetyl [N-Term]
High	High	Master Protein	P27708	CAD protein OS=Homo sapiens GN=CAD PE=1 SV=3	0	0	55	89	1045	86	1	2225	242.8	6.46	21643	1210.67	88	43	2	9.84578e+08	9.4405e+08	1.04449e+09	1.13318e+09	1.17033e+09	1.19475e+09	1.26706e+09	1.30537e+09	1.27663e+09	Acetyl [N-Term]
High	High	Master Protein	P11586	C-1-tetrahydrofolate synthase, cytoplasmic OS=Homo sapiens GN=MTHFD1 PE=1 SV=3	0	0	67	56	1041	55	1	935	101.5	7.3	22370	1210	56	29	1	4.14532e+09	4.10377e+09	4.3179e+09	4.59384e+09	4.50946e+09	4.74944e+09	4.92177e+09	5.05277e+09	5.2298e+09	Acetyl [N-Term]
High	High	Master Protein	P16615	Sarcoplasmic/endoplasmic reticulum calcium ATPase 2 OS=Homo sapiens GN=ATP2A2 PE=1 SV=1	0	0	51	48	986	48	1	1042	114.7	5.34	22622	1207.76	48	26	0	1.65184e+09	1.56778e+09	1.63395e+09	1.92463e+09	1.97057e+09	1.94541e+09	2.4841e+09	2.54908e+09	2.69281e+09	Acetyl [N-Term]
High	High	Master Protein	P40926	Malate dehydrogenase, mitochondrial OS=Homo sapiens GN=MDH2 PE=1 SV=3	0	0	68	21	997	21	1	338	35.5	8.68	24888	1203.54	21	12	0	5.36414e+09	5.407e+09	5.74387e+09	7.53402e+09	7.75165e+09	7.82812e+09	9.53616e+09	1.01295e+10	1.01222e+10
High	High	Master Protein	O75083	WD repeat-containing protein 1 OS=Homo sapiens GN=WDR1 PE=1 SV=4	0	0	63	25	784	25	1	606	66.2	6.65	18419	1182.14	25	13	0	1.29663e+09	1.33043e+09	1.37902e+09	1.69379e+09	1.75633e+09	1.79106e+09	1.98509e+09	1.94979e+09	2.06776e+09
High	High	Master Protein	Q9Y4L1	Hypoxia up-regulated protein 1 OS=Homo sapiens GN=HYOU1 PE=1 SV=1	0	0	60	51	1089	51	1	999	111.3	5.22	26241	1180.96	50	30	0	2.30315e+09	2.38956e+09	2.30856e+09	2.7689e+09	2.76819e+09	2.82692e+09	3.06238e+09	3.12295e+09	3.25291e+09
High	High	Master Protein	Q02790	Peptidyl-prolyl cis-trans isomerase FKBP4 OS=Homo sapiens GN=FKBP4 PE=1 SV=3	0	0	77	40	1277	40	1	459	51.8	5.43	28756	1177.13	40	21	0	6.71391e+09	6.54195e+09	6.94339e+09	8.51472e+09	9.1001e+09	9.35815e+09	1.00305e+10	9.87529e+09	1.05184e+10
High	High	Master Protein	P23246	Splicing factor, proline- and glutamine-rich OS=Homo sapiens GN=SFPQ PE=1 SV=2	0	0	55	40	1290	37	1	707	76.1	9.44	26406	1175.1	40	21	2	4.91558e+09	4.9468e+09	5.27989e+09	6.63065e+09	6.74152e+09	6.79351e+09	6.48381e+09	6.82736e+09	6.65537e+09
High	High	Master Protein	P27797	Calreticulin OS=Homo sapiens GN=CALR PE=1 SV=1	0	0	81	35	1333	35	1	417	48.1	4.44	28782	1173.72	35	18	0	8.04296e+09	8.21253e+09	7.98855e+09	9.10034e+09	8.99592e+09	9.0034e+09	1.02428e+10	9.79278e+09	9.91045e+09
High	High	Master Protein	O75533	Splicing factor 3B subunit 1 OS=Homo sapiens GN=SF3B1 PE=1 SV=3	0	0	61	66	1127	66	1	1304	145.7	7.09	25126	1166.61	66	37	0	1.37033e+09	1.40435e+09	1.41329e+09	1.80132e+09	1.84823e+09	1.8273e+09	1.90974e+09	1.94193e+09	1.93096e+09
High	High	Master Protein	P56192	Methionine--tRNA ligase, cytoplasmic OS=Homo sapiens GN=MARS PE=1 SV=2	0	0	50	44	917	44	1	900	101.1	6.16	20626	1164.14	43	30	0	1.98894e+09	1.83647e+09	1.88829e+09	2.7404e+09	2.80807e+09	2.88627e+09	3.18798e+09	3.28026e+09	3.47225e+09
High	High	Master Protein	P14866	Heterogeneous nuclear ribonucleoprotein L OS=Homo sapiens GN=HNRNPL PE=1 SV=2	0	0	68	28	1004	27	1	589	64.1	8.22	24000	1155.35	28	17	0	2.8804e+09	2.92723e+09	3.04819e+09	4.05523e+09	4.01631e+09	4.03291e+09	4.22062e+09	4.22722e+09	4.2944e+09
High	High	Master Protein	Q07157	Tight junction protein ZO-1 OS=Homo sapiens GN=TJP1 PE=1 SV=3	0	0	75	109	1241	108	1	1748	195.3	6.7	27609	1153.55	106	60	1	1.49383e+09	1.40591e+09	1.51729e+09	1.55296e+09	1.66331e+09	1.64121e+09	1.85927e+09	1.8574e+09	1.90098e+09
High	High	Master Protein	P34897	Serine hydroxymethyltransferase, mitochondrial OS=Homo sapiens GN=SHMT2 PE=1 SV=3	0	0	80	37	1099	35	1	504	56	8.53	26012	1149.98	37	19	3	3.51418e+09	3.39346e+09	3.52226e+09	4.26021e+09	4.64462e+09	4.69036e+09	5.31018e+09	5.65948e+09	5.38596e+09
High	High	Master Protein	P54578	Ubiquitin carboxyl-terminal hydrolase 14 OS=Homo sapiens GN=USP14 PE=1 SV=3	0	0	69	32	1021	32	1	494	56	5.3	22678	1149.76	31	23	0	2.08675e+09	2.00256e+09	2.10029e+09	2.50066e+09	2.6185e+09	2.63077e+09	2.9157e+09	2.80116e+09	2.74097e+09
High	High	Master Protein	Q99798	Aconitate hydratase, mitochondrial OS=Homo sapiens GN=ACO2 PE=1 SV=2	0	0	64	42	819	42	1	780	85.4	7.61	19525	1142.46	42	25	0	1.11784e+09	1.07362e+09	1.1532e+09	1.40622e+09	1.44481e+09	1.50116e+09	1.85287e+09	1.80647e+09	1.82933e+09
High	High	Master Protein	P05198	Eukaryotic translation initiation factor 2 subunit 1 OS=Homo sapiens GN=EIF2S1 PE=1 SV=3	0	0	68	26	861	26	1	315	36.1	5.08	21206	1137.74	26	16	0	1.61615e+09	1.48617e+09	1.51574e+09	1.82851e+09	2.06245e+09	1.98121e+09	2.17632e+09	2.19069e+09	2.04793e+09
High	High	Master Protein	P07237	Protein disulfide-isomerase OS=Homo sapiens GN=P4HB PE=1 SV=3	0	0	73	39	1163	39	1	508	57.1	4.87	29369	1135.11	39	20	0	8.95386e+09	8.74385e+09	9.30613e+09	1.06261e+10	1.09674e+10	1.12172e+10	1.24518e+10	1.18437e+10	1.2116e+10
High	High	Master Protein	Q14697	Neutral alpha-glucosidase AB OS=Homo sapiens GN=GANAB PE=1 SV=3	0	0	60	51	1288	51	1	944	106.8	6.14	27714	1134.2	51	25	0	2.92013e+09	3.06389e+09	2.92808e+09	3.51093e+09	3.64823e+09	3.5449e+09	3.93353e+09	4.0209e+09	4.08568e+09
High	High	Master Protein	P40939	Trifunctional enzyme subunit alpha, mitochondrial OS=Homo sapiens GN=HADHA PE=1 SV=2	0	0	65	36	899	36	1	763	82.9	9.04	20337	1134.17	36	22	0	1.57686e+09	1.47007e+09	1.56822e+09	2.09282e+09	2.09719e+09	2.19713e+09	2.60006e+09	2.6193e+09	2.66257e+09
High	High	Master Protein	Q8IWZ3	Ankyrin repeat and KH domain-containing protein 1 OS=Homo sapiens GN=ANKHD1 PE=1 SV=1	0	0	44	74	826	57	1	2542	269.3	5.73	18711	1131.92	71	42	0	2.60144e+08	2.61933e+08	2.67245e+08	3.57245e+08	3.90716e+08	3.69015e+08	3.92296e+08	3.79818e+08	3.8794e+08	Acetyl [N-Term]
High	High	Master Protein	Q15029	116 kDa U5 small nuclear ribonucleoprotein component OS=Homo sapiens GN=EFTUD2 PE=1 SV=1	0	0	66	55	955	54	1	972	109.4	5	22041	1131.13	54	27	0	1.24641e+09	1.25711e+09	1.28773e+09	1.67478e+09	1.68848e+09	1.74372e+09	1.83623e+09	1.8664e+09	1.99579e+09
High	High	Master Protein	Q5T4S7	E3 ubiquitin-protein ligase UBR4 OS=Homo sapiens GN=UBR4 PE=1 SV=1	0	0	38	153	1259	153	1	5183	573.5	6.04	30107	1127.67	151	67	0	5.45854e+08	5.57943e+08	5.66263e+08	7.03979e+08	7.34935e+08	7.33301e+08	7.88669e+08	7.91937e+08	7.87758e+08
High	High	Master Protein	O14980	Exportin-1 OS=Homo sapiens GN=XPO1 PE=1 SV=1	0	0	55	51	1016	51	1	1071	123.3	6.06	21387	1125.72	51	26	0	1.81561e+09	1.68437e+09	1.7593e+09	1.94128e+09	2.08852e+09	2.08091e+09	2.15859e+09	2.23356e+09	2.2059e+09
High	High	Master Protein	Q06210	Glutamine--fructose-6-phosphate aminotransferase [isomerizing] 1 OS=Homo sapiens GN=GFPT1 PE=1 SV=3	0	0	69	47	951	47	1	699	78.8	7.11	22278	1124.63	47	25	0	1.4003e+09	1.43616e+09	1.51009e+09	1.81133e+09	1.89869e+09	1.95563e+09	1.77531e+09	1.92664e+09	1.90718e+09
High	High	Master Protein	P31150	Rab GDP dissociation inhibitor alpha OS=Homo sapiens GN=GDI1 PE=1 SV=2	0	0	79	31	790	20	1	447	50.6	5.14	16885	1121.9	31	21	0	6.95658e+08	6.56902e+08	6.80678e+08	7.4184e+08	7.60438e+08	8.06221e+08	8.87628e+08	8.9807e+08	9.21981e+08
High	High	Master Protein	Q9Y678	Coatomer subunit gamma-1 OS=Homo sapiens GN=COPG1 PE=1 SV=1	0	0	78	56	962	51	1	874	97.7	5.47	21029	1121.07	56	30	5	1.38411e+09	1.33516e+09	1.40009e+09	1.65271e+09	1.80804e+09	1.7441e+09	1.8559e+09	1.86737e+09	1.91562e+09
High	High	Master Protein	P63244	Receptor of activated protein C kinase 1 OS=Homo sapiens GN=RACK1 PE=1 SV=3	0	0	79	21	907	21	1	317	35.1	7.69	19498	1119.68	21	14	0	5.56235e+09	5.64171e+09	6.02875e+09	6.45266e+09	7.06843e+09	7.3959e+09	7.12318e+09	7.43036e+09	7.49503e+09	Acetyl [N-Term; N-Term]
High	High	Master Protein	Q00341	Vigilin OS=Homo sapiens GN=HDLBP PE=1 SV=2	0	0	59	69	1105	69	1	1268	141.4	6.87	25228	1114.26	66	37	0	1.84053e+09	1.6844e+09	1.78566e+09	2.27116e+09	2.38465e+09	2.40877e+09	2.502e+09	2.6173e+09	2.62097e+09	Acetyl [N-Term]
High	High	Master Protein	Q9NSD9	Phenylalanine--tRNA ligase beta subunit OS=Homo sapiens GN=FARSB PE=1 SV=3	0	0	63	36	875	36	1	589	66.1	6.84	19968	1108.68	36	18	0	1.56724e+09	1.6134e+09	1.57837e+09	2.00199e+09	2.15564e+09	2.09808e+09	2.41579e+09	2.28469e+09	2.38798e+09
High	High	Master Protein	O00410	Importin-5 OS=Homo sapiens GN=IPO5 PE=1 SV=4	0	0	72	54	1044	50	1	1097	123.6	4.94	23407	1096.9	53	33	6	1.65283e+09	1.58289e+09	1.58856e+09	1.9063e+09	1.88843e+09	1.98576e+09	2.05193e+09	2.11941e+09	2.12812e+09	Acetyl [N-Term]
High	High	Master Protein	P49321	Nuclear autoantigenic sperm protein OS=Homo sapiens GN=NASP PE=1 SV=2	0	0	84	59	1104	59	1	788	85.2	4.3	26918	1096.59	58	33	0	1.44614e+09	1.58886e+09	1.48662e+09	1.58479e+09	1.62029e+09	1.54435e+09	1.6098e+09	1.64864e+09	1.62722e+09	Acetyl [N-Term]
High	High	Master Protein	O00571	ATP-dependent RNA helicase DDX3X OS=Homo sapiens GN=DDX3X PE=1 SV=3	0	0	67	47	1130	18	1	662	73.2	7.18	27437	1093.69	47	21	35	2.95082e+09	2.97556e+09	2.96444e+09	3.55706e+09	3.6924e+09	3.64534e+09	4.04041e+09	3.91191e+09	4.07026e+09	Acetyl [N-Term]
High	High	Master Protein	P00390	Glutathione reductase, mitochondrial OS=Homo sapiens GN=GSR PE=1 SV=2	0	0	70	26	767	26	1	522	56.2	8.5	17494	1088.49	25	17	0	1.95897e+09	2.02263e+09	2.18121e+09	2.53807e+09	2.89613e+09	2.8434e+09	3.16861e+09	3.29223e+09	3.11057e+09
High	High	Master Protein	Q92945	Far upstream element-binding protein 2 OS=Homo sapiens GN=KHSRP PE=1 SV=4	0	0	66	44	1151	41	1	711	73.1	7.3	31325	1084.91	42	26	3	2.91744e+09	2.88957e+09	2.83551e+09	3.66003e+09	3.62747e+09	3.83523e+09	3.577e+09	3.66305e+09	3.52978e+09	Acetyl [N-Term]
High	High	Master Protein	P23588	Eukaryotic translation initiation factor 4B OS=Homo sapiens GN=EIF4B PE=1 SV=2	0	0	64	46	1074	46	1	611	69.1	5.73	25950	1079.6	46	17	0	1.73649e+09	1.78748e+09	1.77703e+09	2.41668e+09	2.58755e+09	2.61464e+09	2.57906e+09	2.84503e+09	2.68579e+09
High	High	Master Protein	P29692	Elongation factor 1-delta OS=Homo sapiens GN=EEF1D PE=1 SV=5	0	0	77	23	845	20	1	281	31.1	5.01	22923	1079.44	23	17	3	4.45979e+09	4.18359e+09	4.5596e+09	5.04132e+09	5.92342e+09	5.17521e+09	5.94404e+09	6.13574e+09	6.1743e+09	Acetyl [N-Term]
High	High	Master Protein	P18754	Regulator of chromosome condensation OS=Homo sapiens GN=RCC1 PE=1 SV=1	0	0	67	21	694	21	1	421	44.9	7.52	17942	1077.9	20	17	0	5.84212e+08	5.4678e+08	6.58726e+08	7.05004e+08	7.02163e+08	7.3346e+08	7.87943e+08	7.79113e+08	7.63215e+08
High	High	Master Protein	P06454	Prothymosin alpha OS=Homo sapiens GN=PTMA PE=1 SV=2	0	0	45	9	1228	9	1	111	12.2	3.78	42384	1077.08	9	5	0	6.79276e+09	7.12559e+09	6.36742e+09	5.21307e+09	5.05849e+09	4.92852e+09	8.90412e+09	9.37881e+09	8.90202e+09	Acetyl [N-Term]
High	High	Master Protein	P23921	Ribonucleoside-diphosphate reductase large subunit OS=Homo sapiens GN=RRM1 PE=1 SV=1	0	0	70	47	838	47	1	792	90	7.15	17692	1076.95	47	27	0	2.06386e+09	1.78821e+09	1.96773e+09	1.98293e+09	1.94034e+09	1.92951e+09	1.94231e+09	1.97927e+09	1.87881e+09
High	High	Master Protein	P02545	Prelamin-A/C OS=Homo sapiens GN=LMNA PE=1 SV=1	0	0	80	60	1269	59	1	664	74.1	7.02	32059	1062.01	59	30	1	4.48663e+09	4.2308e+09	4.57482e+09	5.61206e+09	6.08103e+09	5.9663e+09	6.21609e+09	6.58782e+09	6.51262e+09	Acetyl [N-Term]
High	High	Master Protein	Q9Y285	Phenylalanine--tRNA ligase alpha subunit OS=Homo sapiens GN=FARSA PE=1 SV=3	0	0	62	28	866	28	1	508	57.5	7.8	22341	1060.66	28	17	0	1.21421e+09	1.14384e+09	1.19405e+09	1.4375e+09	1.55086e+09	1.47516e+09	1.64551e+09	1.71939e+09	1.67668e+09	Acetyl [N-Term]
High	High	Master Protein	P06744	Glucose-6-phosphate isomerase OS=Homo sapiens GN=GPI PE=1 SV=4	0	0	62	32	1149	32	1	558	63.1	8.32	27530	1056.99	30	19	0	8.02611e+09	8.09194e+09	8.79999e+09	1.08228e+10	1.1833e+10	1.15126e+10	1.19696e+10	1.21864e+10	1.2018e+10	Acetyl [N-Term]
High	High	Master Protein	Q86VP6	Cullin-associated NEDD8-dissociated protein 1 OS=Homo sapiens GN=CAND1 PE=1 SV=2	0	0	53	60	1131	60	1	1230	136.3	5.78	26135	1056.54	60	31	0	3.44011e+09	3.43906e+09	3.3662e+09	4.30143e+09	4.56652e+09	4.60677e+09	4.63164e+09	4.76242e+09	5.04231e+09	Acetyl [N-Term]
High	High	Master Protein	P55795	Heterogeneous nuclear ribonucleoprotein H2 OS=Homo sapiens GN=HNRNPH2 PE=1 SV=1	0	0	52	21	774	12	1	449	49.2	6.3	17549	1055.64	20	9	0	4.76025e+08	4.39456e+08	4.74571e+08	7.09681e+08	7.29966e+08	7.12279e+08	7.09917e+08	7.26269e+08	7.20364e+08	Acetyl [N-Term; N-Term]
High	High	Master Protein	P05455	Lupus La protein OS=Homo sapiens GN=SSB PE=1 SV=2	0	0	61	31	1011	31	1	408	46.8	7.12	25108	1054.94	31	21	0	3.19403e+09	3.09621e+09	3.16165e+09	3.94622e+09	4.06864e+09	3.88744e+09	4.81489e+09	4.68956e+09	4.89409e+09	Acetyl [N-Term]
High	High	Master Protein	Q32MZ4	Leucine-rich repeat flightless-interacting protein 1 OS=Homo sapiens GN=LRRFIP1 PE=1 SV=2	0	0	66	51	958	50	1	808	89.2	4.65	23934	1050.43	50	30	2	1.13601e+09	1.01781e+09	1.06718e+09	1.40063e+09	1.51445e+09	1.39961e+09	1.04423e+09	1.11588e+09	1.09989e+09	Acetyl [N-Term]
High	High	Master Protein	Q07065	Cytoskeleton-associated protein 4 OS=Homo sapiens GN=CKAP4 PE=1 SV=2	0	0	62	38	818	38	1	602	66	5.92	21875	1050.08	37	25	0	1.36293e+09	1.29717e+09	1.34122e+09	1.53685e+09	1.64531e+09	1.62463e+09	2.02497e+09	2.12321e+09	2.03234e+09
High	High	Master Protein	P40227	T-complex protein 1 subunit zeta OS=Homo sapiens GN=CCT6A PE=1 SV=3	0	0	63	27	772	21	1	531	58	6.68	14985	1048.48	27	13	7	2.99341e+09	2.84282e+09	3.20937e+09	3.86681e+09	3.77438e+09	4.3008e+09	4.02644e+09	3.86989e+09	4.05957e+09
High	High	Master Protein	P48634	Protein PRRC2A OS=Homo sapiens GN=PRRC2A PE=1 SV=3	0	0	54	86	949	82	1	2157	228.7	9.45	22083	1048.29	83	56	0	4.53007e+08	4.31262e+08	4.37446e+08	5.24649e+08	5.79668e+08	5.49966e+08	5.98344e+08	6.17112e+08	6.06592e+08
High	High	Master Protein	Q3LXA3	Triokinase/FMN cyclase OS=Homo sapiens GN=TKFC PE=1 SV=2	0	0	66	30	781	30	1	575	58.9	7.49	18080	1043.09	30	18	0	1.1471e+09	1.12858e+09	1.16835e+09	1.55798e+09	1.65172e+09	1.63303e+09	1.77091e+09	1.78167e+09	1.79149e+09
High	High	Master Protein	P36776	Lon protease homolog, mitochondrial OS=Homo sapiens GN=LONP1 PE=1 SV=2	0	0	49	41	817	41	1	959	106.4	6.39	17355	1042.43	40	26	0	1.05699e+09	1.07059e+09	1.0565e+09	1.3796e+09	1.50572e+09	1.44456e+09	1.77242e+09	1.79031e+09	1.76387e+09
High	High	Master Protein	Q01813	ATP-dependent 6-phosphofructokinase, platelet type OS=Homo sapiens GN=PFKP PE=1 SV=2	0	0	57	37	755	34	1	784	85.5	7.55	16571	1041.44	36	19	2	7.92151e+08	7.82335e+08	8.22667e+08	9.83843e+08	1.00899e+09	9.93081e+08	9.96506e+08	1.02828e+09	1.05636e+09	Acetyl [N-Term]
High	High	Master Protein	P10586	Receptor-type tyrosine-protein phosphatase F OS=Homo sapiens GN=PTPRF PE=1 SV=2	0	0	55	72	787	65	1	1907	212.7	6.3	17029	1041.01	72	41	7	3.75725e+08	3.68656e+08	3.92526e+08	5.04372e+08	5.2945e+08	5.47866e+08	6.13175e+08	6.34603e+08	6.42866e+08
High	High	Master Protein	Q12905	Interleukin enhancer-binding factor 2 OS=Homo sapiens GN=ILF2 PE=1 SV=2	0	0	76	24	914	24	1	390	43	5.26	18560	1035.22	24	16	0	2.28431e+09	2.40778e+09	2.34607e+09	3.07862e+09	3.42711e+09	3.25333e+09	3.33553e+09	3.25325e+09	3.53921e+09
High	High	Master Protein	Q99996	A-kinase anchor protein 9 OS=Homo sapiens GN=AKAP9 PE=1 SV=3	0	0	42	141	951	140	1	3911	453.4	4.98	20179	1032.07	137	58	1	3.44157e+08	3.27268e+08	3.19476e+08	4.40687e+08	4.56158e+08	4.34931e+08	3.66457e+08	3.84935e+08	3.72979e+08
High	High	Master Protein	Q14152	Eukaryotic translation initiation factor 3 subunit A OS=Homo sapiens GN=EIF3A PE=1 SV=1	0	0	68	121	1489	120	1	1382	166.5	6.79	32111	1031.18	121	34	1	4.39994e+09	4.24122e+09	4.50735e+09	5.24344e+09	5.7378e+09	5.68893e+09	5.75206e+09	5.9099e+09	5.93945e+09
High	High	Master Protein	P45880	Voltage-dependent anion-selective channel protein 2 OS=Homo sapiens GN=VDAC2 PE=1 SV=2	0	0	67	17	791	17	1	294	31.5	7.56	20201	1029.7	17	8	0	1.92914e+09	1.96353e+09	2.10772e+09	2.15944e+09	2.23694e+09	2.31879e+09	2.16371e+09	2.23166e+09	2.37822e+09	Acetyl [N-Term]
High	High	Master Protein	Q99613	Eukaryotic translation initiation factor 3 subunit C OS=Homo sapiens GN=EIF3C PE=1 SV=1	0	0	49	45	970	44	1	913	105.3	5.68	24537	1024.38	45	18	1	2.1014e+09	2.14737e+09	2.14138e+09	2.84378e+09	2.95986e+09	3.01562e+09	2.89014e+09	3.0736e+09	3.10864e+09
High	High	Master Protein	P61978	Heterogeneous nuclear ribonucleoprotein K OS=Homo sapiens GN=HNRNPK PE=1 SV=1	0	0	71	36	1433	36	1	463	50.9	5.54	32344	1023.82	36	19	0	1.1422e+10	1.12847e+10	1.19776e+10	1.40089e+10	1.34682e+10	1.36822e+10	1.43881e+10	1.49473e+10	1.57658e+10	Acetyl [N-Term]
High	High	Master Protein	Q9NR30	Nucleolar RNA helicase 2 OS=Homo sapiens GN=DDX21 PE=1 SV=5	0	0	64	53	918	51	1	783	87.3	9.28	20702	1023.63	53	29	2	1.10697e+09	1.08238e+09	1.163e+09	1.40776e+09	1.49915e+09	1.51954e+09	1.55066e+09	1.55131e+09	1.59847e+09
High	High	Master Protein	P23396	40S ribosomal protein S3 OS=Homo sapiens GN=RPS3 PE=1 SV=2	0	0	84	27	913	27	1	243	26.7	9.66	18711	1023.37	27	10	0	5.86096e+09	5.60001e+09	5.83952e+09	7.27373e+09	7.83582e+09	7.44292e+09	7.72578e+09	8.39344e+09	8.06681e+09	Acetyl [N-Term]
High	High	Master Protein	P05388	60S acidic ribosomal protein P0 OS=Homo sapiens GN=RPLP0 PE=1 SV=1	0	0	59	16	659	5	1	317	34.3	5.97	12091	1020.68	16	11	11	4.00565e+09	3.83264e+09	4.24966e+09	4.68795e+09	4.82599e+09	5.06103e+09	4.84912e+09	5.12304e+09	4.71521e+09
High	High	Master Protein Candidate	P19105	Myosin regulatory light chain 12A OS=Homo sapiens GN=MYL12A PE=1 SV=2	0	0	67	15	689	15	1	171	19.8	4.81	15356	1018.94	15	13	0	1.70183e+09	1.84233e+09	1.822e+09	1.82213e+09	2.04181e+09	1.97429e+09	2.03012e+09	2.05694e+09	1.9955e+09
High	High	Master Protein	O14950	Myosin regulatory light chain 12B OS=Homo sapiens GN=MYL12B PE=1 SV=2	0	0	66	15	689	15	1	172	19.8	4.84	15356	1018.94	15	13	0	1.70183e+09	1.84233e+09	1.822e+09	1.82213e+09	2.04181e+09	1.97429e+09	2.03012e+09	2.05694e+09	1.9955e+09
High	High	Master Protein	P55884	Eukaryotic translation initiation factor 3 subunit B OS=Homo sapiens GN=EIF3B PE=1 SV=3	0	0	62	45	905	45	1	814	92.4	5	19795	1016.21	45	25	0	2.2522e+09	2.21138e+09	2.31049e+09	2.64047e+09	2.69131e+09	2.77217e+09	3.0702e+09	3.10974e+09	2.93544e+09	Acetyl [N-Term]
High	High	Master Protein	P63010	AP-2 complex subunit beta OS=Homo sapiens GN=AP2B1 PE=1 SV=1	0	0	58	52	928	30	1	937	104.5	5.38	20070	1009.21	52	30	25	1.90933e+09	1.85349e+09	1.91099e+09	2.29518e+09	2.33918e+09	2.41085e+09	2.48844e+09	2.65794e+09	2.7015e+09
High	High	Master Protein	P08237	ATP-dependent 6-phosphofructokinase, muscle type OS=Homo sapiens GN=PFKM PE=1 SV=2	0	0	55	37	892	34	1	780	85.1	7.99	21682	1004.32	37	19	4	1.65649e+09	1.64156e+09	1.65135e+09	2.02986e+09	2.13976e+09	2.06646e+09	2.18182e+09	2.16513e+09	2.10557e+09	Acetyl [N-Term; N-Term]
High	High	Master Protein	P46821	Microtubule-associated protein 1B OS=Homo sapiens GN=MAP1B PE=1 SV=2	0	0	53	91	916	89	1	2468	270.5	4.81	19776	1000.53	89	44	2	2.50835e+08	2.50679e+08	2.68112e+08	4.33544e+08	4.67827e+08	4.71412e+08	5.54552e+08	5.63871e+08	5.57125e+08	Acetyl [N-Term]
High	High	Master Protein	Q14839	Chromodomain-helicase-DNA-binding protein 4 OS=Homo sapiens GN=CHD4 PE=1 SV=2	0	0	53	97	1123	72	1	1912	217.9	5.86	23800	998.1	95	50	25	1.01984e+09	1.02198e+09	1.03032e+09	1.09947e+09	1.11495e+09	1.10253e+09	1.14955e+09	1.20241e+09	1.23741e+09
High	High	Master Protein	P58876	Histone H2B type 1-D OS=Homo sapiens GN=HIST1H2BD PE=1 SV=2	0	0	65	11	1081	4	1	126	13.9	10.32	31238	997.02	11	3	9	1.98449e+10	1.65586e+10	1.72322e+10	1.86551e+10	2.17715e+10	2.07682e+10	2.06543e+10	1.96988e+10	2.02586e+10
High	High	Master Protein Candidate	Q99880	Histone H2B type 1-L OS=Homo sapiens GN=HIST1H2BL PE=1 SV=3	0	0	65	11	1081	4	1	126	13.9	10.32	31238	997.02	11	3	0	1.98449e+10	1.65586e+10	1.72322e+10	1.86551e+10	2.17715e+10	2.07682e+10	2.06543e+10	1.96988e+10	2.02586e+10
High	High	Master Protein Candidate	Q99879	Histone H2B type 1-M OS=Homo sapiens GN=HIST1H2BM PE=1 SV=3	0	0	65	11	1081	4	1	126	14	10.32	31238	997.02	11	3	0	1.98449e+10	1.65586e+10	1.72322e+10	1.86551e+10	2.17715e+10	2.07682e+10	2.06543e+10	1.96988e+10	2.02586e+10
High	High	Master Protein Candidate	Q99877	Histone H2B type 1-N OS=Homo sapiens GN=HIST1H2BN PE=1 SV=3	0	0	65	11	1081	4	1	126	13.9	10.32	31238	997.02	11	3	0	1.98449e+10	1.65586e+10	1.72322e+10	1.86551e+10	2.17715e+10	2.07682e+10	2.06543e+10	1.96988e+10	2.02586e+10
High	High	Master Protein Candidate	P62807	Histone H2B type 1-C/E/F/G/I OS=Homo sapiens GN=HIST1H2BC PE=1 SV=4	0	0	65	11	1081	4	1	126	13.9	10.32	31238	997.02	11	3	0	1.98449e+10	1.65586e+10	1.72322e+10	1.86551e+10	2.17715e+10	2.07682e+10	2.06543e+10	1.96988e+10	2.02586e+10
High	High	Master Protein Candidate	Q93079	Histone H2B type 1-H OS=Homo sapiens GN=HIST1H2BH PE=1 SV=3	0	0	65	11	1081	4	1	126	13.9	10.32	31238	997.02	11	3	0	1.98449e+10	1.65586e+10	1.72322e+10	1.86551e+10	2.17715e+10	2.07682e+10	2.06543e+10	1.96988e+10	2.02586e+10
High	High	Master Protein Candidate	Q5QNW6	Histone H2B type 2-F OS=Homo sapiens GN=HIST2H2BF PE=1 SV=3	0	0	65	11	1081	4	1	126	13.9	10.32	31238	997.02	11	3	0	1.98449e+10	1.65586e+10	1.72322e+10	1.86551e+10	2.17715e+10	2.07682e+10	2.06543e+10	1.96988e+10	2.02586e+10
High	High	None	O60814	Histone H2B type 1-K OS=Homo sapiens GN=HIST1H2BK PE=1 SV=3	0	0	58	10	1078	4	1	126	13.9	10.32	31169	997.02	10	3	0	1.98446e+10	1.65583e+10	1.72318e+10	1.86551e+10	2.17712e+10	2.07682e+10	2.06541e+10	1.96985e+10	2.02584e+10
High	High	None	P57053	Histone H2B type F-S OS=Homo sapiens GN=H2BFS PE=1 SV=2	0	0	53	9	1073	4	1	126	13.9	10.37	31107	997.02	9	3	0	1.98432e+10	1.65563e+10	1.72293e+10	1.86322e+10	2.17559e+10	2.07527e+10	2.06377e+10	1.96743e+10	2.02396e+10
High	High	Master Protein	P31040	Succinate dehydrogenase [ubiquinone] flavoprotein subunit, mitochondrial OS=Homo sapiens GN=SDHA PE=1 SV=2	0	0	63	30	746	30	1	664	72.6	7.39	18089	996.12	30	18	0	7.05543e+08	6.80986e+08	7.63738e+08	8.9516e+08	9.73454e+08	9.65835e+08	1.12624e+09	1.25589e+09	1.17792e+09
High	High	Master Protein	P39023	60S ribosomal protein L3 OS=Homo sapiens GN=RPL3 PE=1 SV=2	0	0	52	27	880	27	1	403	46.1	10.18	19015	994.59	27	11	0	5.18447e+09	4.97913e+09	5.20479e+09	6.67379e+09	7.04736e+09	7.51531e+09	6.97928e+09	7.94513e+09	7.83391e+09
High	High	Master Protein	P62195	26S protease regulatory subunit 8 OS=Homo sapiens GN=PSMC5 PE=1 SV=1	0	0	71	29	798	27	1	406	45.6	7.55	19645	991.59	28	17	0	1.37521e+09	1.38628e+09	1351254413	1.59218e+09	1.63352e+09	1.77156e+09	1.70246e+09	1.8448e+09	1.81195e+09	Acetyl [N-Term]
High	High	Master Protein	P16989	Y-box-binding protein 3 OS=Homo sapiens GN=YBX3 PE=1 SV=4	0	0	73	20	709	15	1	372	40.1	9.77	19261	990.22	20	12	0	6.04795e+08	5.82046e+08	5.64694e+08	7.41739e+08	7.64279e+08	7.07141e+08	8.32868e+08	8.1594e+08	9.1323e+08	Acetyl [N-Term]
High	High	Master Protein	Q9UQE7	Structural maintenance of chromosomes protein 3 OS=Homo sapiens GN=SMC3 PE=1 SV=2	0	0	52	74	924	73	1	1217	141.5	7.18	22826	987.42	73	37	1	1.02308e+09	9.69319e+08	9.88427e+08	1.13921e+09	1.17464e+09	1.19353e+09	1.20654e+09	1.24809e+09	1.22292e+09
High	High	Master Protein	Q63HN8	E3 ubiquitin-protein ligase RNF213 OS=Homo sapiens GN=RNF213 PE=1 SV=3	0	0	41	174	1259	172	1	5207	591	6.48	28851	986.68	172	73	2	6.46249e+08	6.12345e+08	6.65191e+08	8.24418e+08	8.15297e+08	8.47318e+08	8.26474e+08	8.59931e+08	8.56613e+08	Acetyl [N-Term]
High	High	Master Protein	O60841	Eukaryotic translation initiation factor 5B OS=Homo sapiens GN=EIF5B PE=1 SV=4	0	0	45	65	951	65	1	1220	138.7	5.49	22292	986.05	65	33	0	1.12598e+09	1.13195e+09	1.22605e+09	1.39849e+09	1.42476e+09	1.51421e+09	1.57872e+09	1.69646e+09	1.69229e+09
High	High	Master Protein	O75153	Clustered mitochondria protein homolog OS=Homo sapiens GN=CLUH PE=1 SV=2	0	0	62	65	868	65	1	1309	146.6	6.13	19908	981.24	64	36	0	1.04281e+09	9.73847e+08	1.07971e+09	1.19305e+09	1.26052e+09	1.21758e+09	1.50612e+09	1.51084e+09	1.49502e+09
High	High	Master Protein	O43776	Asparagine--tRNA ligase, cytoplasmic OS=Homo sapiens GN=NARS PE=1 SV=1	0	0	55	34	807	34	1	548	62.9	6.25	18087	978.94	34	20	0	1.95447e+09	1.96369e+09	2.0314e+09	2.29094e+09	2.65885e+09	2.76486e+09	2.71615e+09	2.90389e+09	2.66008e+09
High	High	Master Protein Candidate Rejected	Q16778	Histone H2B type 2-E OS=Homo sapiens GN=HIST2H2BE PE=1 SV=3	0	0	64	10	1047	0	0	126	13.9	10.32	30639	978.5	10	2	0
High	High	Master Protein Rejected	P23527	Histone H2B type 1-O OS=Homo sapiens GN=HIST1H2BO PE=1 SV=3	0	0	64	10	1047	0	0	126	13.9	10.32	30639	978.5	10	2	0
High	High	Master Protein Candidate Rejected	P33778	Histone H2B type 1-B OS=Homo sapiens GN=HIST1H2BB PE=1 SV=2	0	0	64	10	1047	0	0	126	13.9	10.32	30639	978.5	10	2	0
High	High	None	P06899	Histone H2B type 1-J OS=Homo sapiens GN=HIST1H2BJ PE=1 SV=3	0	0	57	9	1044	0	0	126	13.9	10.32	30569	978.5	9	2	0
High	High	Master Protein	Q8N257	Histone H2B type 3-B OS=Homo sapiens GN=HIST3H2BB PE=1 SV=3	0	0	64	9	1018	2	1	126	13.9	10.32	30136	978.5	9	2	0	6.0713e+08	6.68881e+08	6.86147e+08	7.50599e+08	7.18566e+08	7.65206e+08	6.31384e+08	7.82033e+08	6.74771e+08
High	High	Master Protein	P24752	Acetyl-CoA acetyltransferase, mitochondrial OS=Homo sapiens GN=ACAT1 PE=1 SV=1	0	0	67	25	682	25	1	427	45.2	8.85	16573	974.88	25	14	0	1.48536e+09	1.40248e+09	1.5074e+09	2.03265e+09	1998624638	2.02316e+09	2.67183e+09	2.39019e+09	2.53106e+09
High	High	Master Protein	P38606	V-type proton ATPase catalytic subunit A OS=Homo sapiens GN=ATP6V1A PE=1 SV=2	0	0	76	36	799	36	1	617	68.3	5.52	18903	973.56	35	19	0	1.53003e+09	1.45947e+09	1.57086e+09	1.81642e+09	1.98961e+09	1.97152e+09	1.87781e+09	2.01889e+09	2.02922e+09
High	High	Master Protein	P27824	Calnexin OS=Homo sapiens GN=CANX PE=1 SV=2	0	0	48	40	956	40	1	592	67.5	4.6	24154	972.98	40	20	0	1.69874e+09	1.72157e+09	1.80267e+09	1.93515e+09	2.01019e+09	2.06239e+09	2.67984e+09	2.73837e+09	2.82195e+09
High	High	Master Protein	O60763	General vesicular transport factor p115 OS=Homo sapiens GN=USO1 PE=1 SV=2	0	0	51	40	764	40	1	962	107.8	4.91	20352	971.11	40	27	0	7.20288e+08	7.11324e+08	7.14377e+08	8.20069e+08	8.9835e+08	9.26496e+08	9.78983e+08	1.01725e+09	1.0085e+09
High	High	Master Protein	P35658	Nuclear pore complex protein Nup214 OS=Homo sapiens GN=NUP214 PE=1 SV=2	0	0	51	67	779	67	1	2090	213.5	7.47	18811	969.57	64	41	0	4.56058e+08	4.34449e+08	4.33517e+08	5.68538e+08	5.60097e+08	5.67405e+08	5.90024e+08	6.02061e+08	6.2052e+08	Acetyl [N-Term]
High	High	Master Protein	P49368	T-complex protein 1 subunit gamma OS=Homo sapiens GN=CCT3 PE=1 SV=4	0	0	66	36	1101	36	1	545	60.5	6.49	26919	967.77	36	21	0	5.25592e+09	4.99695e+09	5.44731e+09	6.32503e+09	6.69418e+09	6.9516e+09	7.25657e+09	7.18323e+09	7.17735e+09	Acetyl [N-Term]
High	High	Master Protein	P30086	Phosphatidylethanolamine-binding protein 1 OS=Homo sapiens GN=PEBP1 PE=1 SV=3	0	0	82	14	688	14	1	187	21	7.53	15439	966.85	14	8	0	6.78152e+09	6.61194e+09	7.32182e+09	8.68005e+09	9501033537	9.24239e+09	9.20238e+09	9.46774e+09	9.92756e+09
High	High	Master Protein	O60664	Perilipin-3 OS=Homo sapiens GN=PLIN3 PE=1 SV=3	0	0	65	22	668	22	1	434	47	5.44	18954	963.52	22	12	0	9.43584e+08	9.72541e+08	1.01053e+09	1.16152e+09	1.29692e+09	1.21185e+09	1.423e+09	1.46636e+09	1.36456e+09
High	High	Master Protein	Q14566	DNA replication licensing factor MCM6 OS=Homo sapiens GN=MCM6 PE=1 SV=1	0	0	56	47	862	47	1	821	92.8	5.41	19460	962.59	46	25	0	2.18959e+09	2.16334e+09	2.18748e+09	2.30574e+09	2.39199e+09	2.4959e+09	2.50272e+09	2.40051e+09	2.78714e+09	Acetyl [N-Term]
High	High	Master Protein	P54136	Arginine--tRNA ligase, cytoplasmic OS=Homo sapiens GN=RARS PE=1 SV=2	0	0	71	46	927	46	1	660	75.3	6.68	19980	961.84	45	20	0	2.18769e+09	2.1549e+09	2.33275e+09	2.78562e+09	2.91911e+09	2.89794e+09	2.98151e+09	3.06303e+09	3.19912e+09	Acetyl [N-Term]
High	High	Master Protein	P09972	Fructose-bisphosphate aldolase C OS=Homo sapiens GN=ALDOC PE=1 SV=2	0	0	86	30	706	25	1	364	39.4	6.87	16048	959.84	30	19	0	8.12153e+08	8.51178e+08	8.13728e+08	1.05096e+09	1.10324e+09	1.08594e+09	1.26207e+09	1.22345e+09	1.23282e+09	Acetyl [N-Term]
High	High	Master Protein	P36578	60S ribosomal protein L4 OS=Homo sapiens GN=RPL4 PE=1 SV=5	0	0	52	29	811	29	1	427	47.7	11.06	17338	959.83	29	15	0	5.52792e+09	5.67325e+09	5.85601e+09	7.40635e+09	7.7035e+09	7.84385e+09	8.40098e+09	8.55789e+09	8.46071e+09	Acetyl [N-Term]
High	High	Master Protein	P35222	Catenin beta-1 OS=Homo sapiens GN=CTNNB1 PE=1 SV=1	0	0	62	37	800	32	1	781	85.4	5.86	20693	958.6	37	21	0	6.70531e+08	6.45977e+08	6.78236e+08	7.6503e+08	8.16094e+08	8.36837e+08	6.9797e+08	6.80206e+08	7.17947e+08	Acetyl [N-Term]
High	High	Master Protein	P43686	26S protease regulatory subunit 6B OS=Homo sapiens GN=PSMC4 PE=1 SV=2	0	0	74	34	711	33	1	418	47.3	5.21	14407	951.98	33	18	2	1.16928e+09	1.13822e+09	1.1323e+09	1.58261e+09	1.74715e+09	1.67276e+09	1.65188e+09	1.69104e+09	1.7121e+09	Acetyl [N-Term]
High	High	Master Protein	O15523	ATP-dependent RNA helicase DDX3Y OS=Homo sapiens GN=DDX3Y PE=1 SV=2	0	0	58	39	940	10	1	660	73.1	7.55	21152	951.88	39	18	0	1.43897e+08	1.38341e+08	1.45044e+08	180686040	1.82647e+08	1.7811e+08	2.6685e+08	221604541	2.62223e+08
High	High	Master Protein	Q13151	Heterogeneous nuclear ribonucleoprotein A0 OS=Homo sapiens GN=HNRNPA0 PE=1 SV=1	0	0	50	10	574	10	1	305	30.8	9.29	13212	946.01	10	8	0	1.04e+09	1.06235e+09	1.09104e+09	1.45891e+09	1.44876e+09	1.43139e+09	1.79763e+09	1.83408e+09	1.72016e+09	Acetyl [N-Term]
High	High	Master Protein	Q12931	Heat shock protein 75 kDa, mitochondrial OS=Homo sapiens GN=TRAP1 PE=1 SV=3	0	0	59	37	830	36	1	704	80.1	8.21	18337	945.83	37	20	0	1.31775e+09	1.30694e+09	1.42876e+09	1.74161e+09	1.78579e+09	1.82503e+09	1.97651e+09	2.13488e+09	2.18145e+09
High	High	Master Protein	Q10567	AP-1 complex subunit beta-1 OS=Homo sapiens GN=AP1B1 PE=1 SV=2	0	0	52	47	902	25	1	949	104.6	5.06	19854	943.98	46	24	0	5.56437e+08	5.54928e+08	5.69202e+08	7.72974e+08	7.45254e+08	7.38466e+08	8.07565e+08	8.07223e+08	8.29721e+08
High	High	Master Protein	P13637	Sodium/potassium-transporting ATPase subunit alpha-3 OS=Homo sapiens GN=ATP1A3 PE=1 SV=3	0	0	21	19	608	1	1	1013	111.7	5.38	14864	943.38	18	10	0
High	High	Master Protein	Q92900	Regulator of nonsense transcripts 1 OS=Homo sapiens GN=UPF1 PE=1 SV=2	0	0	61	60	913	59	1	1129	124.3	6.61	21224	942.03	59	33	1	1.29007e+09	1.23635e+09	1.28891e+09	1.53575e+09	1.59597e+09	1.66883e+09	1.67994e+09	1.69465e+09	1.73192e+09
High	High	Master Protein	P13798	Acylamino-acid-releasing enzyme OS=Homo sapiens GN=APEH PE=1 SV=4	0	0	67	32	747	32	1	732	81.2	5.48	16659	939.34	31	21	0	2.03136e+09	2.05562e+09	2.17958e+09	2.25258e+09	2.47136e+09	2.36779e+09	2.66059e+09	2.7639e+09	2.66433e+09
High	High	Master Protein	Q9NYU2	UDP-glucose:glycoprotein glucosyltransferase 1 OS=Homo sapiens GN=UGGT1 PE=1 SV=3	0	0	47	60	765	58	1	1555	177.1	5.63	16084	936.09	59	33	2	6.4834e+08	6.39778e+08	6.79293e+08	7.64202e+08	7.57964e+08	7.8709e+08	7.47976e+08	8.23113e+08	8.29715e+08
High	High	Master Protein	Q14008	Cytoskeleton-associated protein 5 OS=Homo sapiens GN=CKAP5 PE=1 SV=3	0	0	57	109	1124	109	1	2032	225.4	7.8	26918	933.21	108	51	0	1.15632e+09	1.13021e+09	1.15217e+09	1.35218e+09	1.40972e+09	1.463e+09	1.56566e+09	1.60107e+09	1.64319e+09	Acetyl [N-Term]
High	High	Master Protein	Q8NC51	Plasminogen activator inhibitor 1 RNA-binding protein OS=Homo sapiens GN=SERBP1 PE=1 SV=2	0	0	62	34	907	34	1	408	44.9	8.65	21141	932.99	33	19	0	3.48864e+09	3.59281e+09	3.73327e+09	4.24145e+09	4.28844e+09	4.50705e+09	4.12156e+09	4.41918e+09	4.38605e+09
High	High	Master Protein	Q7KZF4	Staphylococcal nuclease domain-containing protein 1 OS=Homo sapiens GN=SND1 PE=1 SV=1	0	0	65	58	1262	58	1	910	101.9	7.17	32997	931.82	58	35	0	5.47359e+09	5.57839e+09	5.49033e+09	6.63732e+09	6.70178e+09	6.95706e+09	6.93064e+09	7.32251e+09	7.52154e+09	Acetyl [N-Term]
High	High	Master Protein	P23526	Adenosylhomocysteinase OS=Homo sapiens GN=AHCY PE=1 SV=4	0	0	56	28	917	27	1	432	47.7	6.34	22424	931.34	28	14	1	6.60352e+09	6.08272e+09	6.52063e+09	7.49821e+09	7.75544e+09	7.78234e+09	7.99635e+09	7.84319e+09	8.34961e+09	Acetyl [N-Term]
High	High	Master Protein	P21964	Catechol O-methyltransferase OS=Homo sapiens GN=COMT PE=1 SV=2	0	0	66	17	634	17	1	271	30	5.47	12965	929.25	17	12	0	1.51712e+09	1.62948e+09	1.59773e+09	1.98599e+09	2.01235e+09	1.87525e+09	2.07431e+09	2.0128e+09	2.11459e+09
High	High	Master Protein	O43242	26S proteasome non-ATPase regulatory subunit 3 OS=Homo sapiens GN=PSMD3 PE=1 SV=2	0	0	68	45	917	45	1	534	60.9	8.44	22286	928.55	45	22	0	1.98532e+09	1.82709e+09	1.95905e+09	2.34448e+09	2.53155e+09	2.35709e+09	2.63399e+09	2.6807e+09	2.60554e+09
High	High	Master Protein	P35606	Coatomer subunit beta' OS=Homo sapiens GN=COPB2 PE=1 SV=2	0	0	61	44	853	44	1	906	102.4	5.27	18121	926.4	44	29	0	1.47008e+09	1.40269e+09	1.39834e+09	1.83828e+09	1.79227e+09	1.85188e+09	1.87766e+09	1.87204e+09	1.87884e+09
High	High	Master Protein	Q29RF7	Sister chromatid cohesion protein PDS5 homolog A OS=Homo sapiens GN=PDS5A PE=1 SV=1	0	0	47	60	751	57	1	1337	150.7	7.91	19873	921.32	60	34	4	3.90368e+08	3.93394e+08	3.90394e+08	3.92985e+08	4.29186e+08	4.35821e+08	4.79811e+08	5.20426e+08	5.15032e+08
High	High	Master Protein	Q9Y520	Protein PRRC2C OS=Homo sapiens GN=PRRC2C PE=1 SV=4	0	0	42	108	992	104	1	2896	316.7	9.13	22465	918.45	106	44	4	7.51185e+08	7.4698e+08	8.21538e+08	9.68823e+08	9.99729e+08	1.00355e+09	1.07069e+09	1.12388e+09	1.11952e+09
High	High	Master Protein	P55786	Puromycin-sensitive aminopeptidase OS=Homo sapiens GN=NPEPPS PE=1 SV=2	0	0	60	52	874	52	1	919	103.2	5.72	19216	910.66	52	25	0	2.42441e+09	2.35957e+09	2.34549e+09	3.00172e+09	3.04531e+09	3.14835e+09	3.32019e+09	3.34735e+09	3.39141e+09
High	High	Master Protein	P09429	High mobility group protein B1 OS=Homo sapiens GN=HMGB1 PE=1 SV=3	0	0	46	19	723	14	1	215	24.9	5.74	17129	908.91	19	16	8	3.37016e+09	3.33244e+09	3.62717e+09	4.42247e+09	4.82275e+09	4.6047e+09	4.74425e+09	5.16624e+09	5.19205e+09
High	High	Master Protein	P30153	Serine/threonine-protein phosphatase 2A 65 kDa regulatory subunit A alpha isoform OS=Homo sapiens GN=PPP2R1A PE=1 SV=4	0	0	60	33	864	25	1	589	65.3	5.11	23587	907.89	32	16	8	3.04359e+09	2.94153e+09	3.17186e+09	3.85715e+09	3.9811e+09	4.02541e+09	4.18988e+09	4.12579e+09	4.21674e+09	Acetyl [N-Term]
High	High	Master Protein	Q14126	Desmoglein-2 OS=Homo sapiens GN=DSG2 PE=1 SV=2	0	0	53	39	644	39	1	1118	122.2	5.24	14896	906.59	37	23	0	4.96315e+08	4.99941e+08	5.17315e+08	4.71864e+08	4.88005e+08	5.26714e+08	6.67655e+08	6.4496e+08	6.41136e+08
High	High	Master Protein	Q14166	Tubulin--tyrosine ligase-like protein 12 OS=Homo sapiens GN=TTLL12 PE=1 SV=2	0	0	66	37	684	37	1	644	74.4	5.53	14522	902.36	37	25	0	1.39864e+09	1.29617e+09	1.412e+09	1.87138e+09	1.76629e+09	1.87543e+09	1.99901e+09	2.05789e+09	1.97593e+09	Acetyl [N-Term]
High	High	Master Protein	P26639	Threonine--tRNA ligase, cytoplasmic OS=Homo sapiens GN=TARS PE=1 SV=3	0	0	70	50	976	46	1	723	83.4	6.67	20208	901.66	49	26	4	3.44258e+09	3.28441e+09	3.40331e+09	4.72391e+09	4.91281e+09	4.72083e+09	5.34282e+09	5.36896e+09	5.49191e+09
High	High	Master Protein	O60506	Heterogeneous nuclear ribonucleoprotein Q OS=Homo sapiens GN=SYNCRIP PE=1 SV=2	0	0	63	34	975	22	1	623	69.6	8.59	22255	901.43	34	20	0	2.80463e+09	2.6034e+09	2.64081e+09	3.17041e+09	3.40535e+09	3.27134e+09	3.46736e+09	3.54448e+09	3.3384e+09	Acetyl [N-Term]
High	High	Master Protein	Q9NY33	Dipeptidyl peptidase 3 OS=Homo sapiens GN=DPP3 PE=1 SV=2	0	0	66	36	638	36	1	737	82.5	5.1	13722	899.83	35	17	0	7.68666e+08	8.63189e+08	8.1298e+08	1.09929e+09	1.15109e+09	1.07455e+09	1096652697	1.03994e+09	1.01778e+09	Acetyl [N-Term]
High	High	Master Protein	P35232	Prohibitin OS=Homo sapiens GN=PHB PE=1 SV=1	0	0	83	21	682	21	1	272	29.8	5.76	17632	898.72	21	10	0	1.81464e+09	1.78856e+09	1.82801e+09	2.1319e+09	2.14173e+09	2.14321e+09	2.22324e+09	2.33845e+09	2.28105e+09
High	High	Master Protein	P19367	Hexokinase-1 OS=Homo sapiens GN=HK1 PE=1 SV=3	0	0	56	51	812	47	1	917	102.4	6.8	17466	896.88	49	24	6	1.4358e+09	1.41863e+09	1.42687e+09	1.74913e+09	1.77834e+09	1.75276e+09	1.94495e+09	1.94833e+09	1.93916e+09
High	High	Master Protein	Q9H3U1	Protein unc-45 homolog A OS=Homo sapiens GN=UNC45A PE=1 SV=1	0	0	61	54	860	54	1	944	103	6.07	21443	894.32	54	31	0	1.04892e+09	9.4165e+08	1.02384e+09	1.24051e+09	1.2596e+09	1.25609e+09	1.43435e+09	1.45422e+09	1.47596e+09
High	High	Master Protein	P08133	Annexin A6 OS=Homo sapiens GN=ANXA6 PE=1 SV=3	0	0	69	52	937	52	1	673	75.8	5.6	21492	893.49	52	22	0	3.31896e+09	3.21068e+09	3.28881e+09	3.50525e+09	3.63517e+09	3.58393e+09	3.72689e+09	3.74791e+09	3.85935e+09
High	High	Master Protein	O75179	Ankyrin repeat domain-containing protein 17 OS=Homo sapiens GN=ANKRD17 PE=1 SV=3	0	0	41	75	725	58	1	2603	274.1	6.52	16175	892.24	72	42	18	4.99765e+08	4.83373e+08	4.98411e+08	5.55803e+08	6.10083e+08	6.35942e+08	7.10468e+08	7.05937e+08	7.46288e+08
High	High	Master Protein	O95359	Transforming acidic coiled-coil-containing protein 2 OS=Homo sapiens GN=TACC2 PE=1 SV=3	0	0	54	104	741	101	1	2948	309.2	4.79	15229	891.98	100	59	3	3.03772e+08	3.02109e+08	2.93431e+08	3.36309e+08	3.45776e+08	3.35503e+08	5.69388e+08	5.04107e+08	5.68427e+08
High	High	Master Protein	Q9UMS4	Pre-mRNA-processing factor 19 OS=Homo sapiens GN=PRPF19 PE=1 SV=1	0	0	75	25	580	25	1	504	55.1	6.61	10164	889.38	25	14	0	1.52542e+09	1.4648e+09	1.56856e+09	2.06662e+09	2.02995e+09	2037978154	1.98268e+09	2.00052e+09	1.99135e+09	Acetyl [N-Term]
High	High	Master Protein	A0MZ66	Shootin-1 OS=Homo sapiens GN=SHTN1 PE=1 SV=4	0	0	69	51	750	51	1	631	71.6	5.33	15284	888.52	51	26	0	7.39811e+08	6.92686e+08	6.81667e+08	8.81183e+08	9.28065e+08	8.86215e+08	1.04661e+09	1.05058e+09	1.03261e+09	Acetyl [N-Term]
High	High	Master Protein	Q15424	Scaffold attachment factor B1 OS=Homo sapiens GN=SAFB PE=1 SV=4	0	0	54	54	907	39	1	915	102.6	5.47	21110	886.86	54	23	15	1.27709e+09	1.20639e+09	1.26617e+09	1.63536e+09	1.7592e+09	1.63441e+09	1.7508e+09	1.80053e+09	1.77202e+09	Acetyl [N-Term]
High	High	Master Protein	P35749	Myosin-11 OS=Homo sapiens GN=MYH11 PE=1 SV=3	0	0	16	34	718	6	1	1972	227.2	5.5	17243	884.94	31	17	0
High	High	Master Protein	Q12888	Tumor suppressor p53-binding protein 1 OS=Homo sapiens GN=TP53BP1 PE=1 SV=2	0	0	51	71	707	71	1	1972	213.4	4.7	16126	884.19	66	50	0	2.91576e+08	2.85105e+08	2.97312e+08	3.73955e+08	3.92911e+08	3.89859e+08	3.50125e+08	4.06099e+08	3.90207e+08
High	High	Master Protein	Q9UQ80	Proliferation-associated protein 2G4 OS=Homo sapiens GN=PA2G4 PE=1 SV=3	0	0	70	29	1008	29	1	394	43.8	6.55	25862	883.14	28	15	0	4.99728e+09	5.08869e+09	5.27462e+09	5.63525e+09	6.18542e+09	6.32061e+09	6.46641e+09	6.73246e+09	6.6872e+09	Acetyl [N-Term]
High	High	Master Protein	P00505	Aspartate aminotransferase, mitochondrial OS=Homo sapiens GN=GOT2 PE=1 SV=3	0	0	71	29	683	29	1	430	47.5	9.01	14853	881.55	29	16	0	2.2585e+09	2.21634e+09	2.40243e+09	3074885227	3.19908e+09	3.29203e+09	3.5474e+09	3.76093e+09	3.67577e+09
High	High	None	B5ME19	Eukaryotic translation initiation factor 3 subunit C-like protein OS=Homo sapiens GN=EIF3CL PE=3 SV=1	0	0	47	44	901	43	1	914	105.4	5.64	22900	880.38	44	17	0	2.0667e+09	2.11484e+09	2.10776e+09	2.84369e+09	2.95986e+09	3.01562e+09	2.80926e+09	2.99338e+09	3.03064e+09
High	High	Master Protein	Q13185	Chromobox protein homolog 3 OS=Homo sapiens GN=CBX3 PE=1 SV=4	0	0	66	11	621	9	1	183	20.8	5.33	13860	878.55	11	7	0	1.28529e+09	1.23909e+09	1.25463e+09	1.34163e+09	1408061905	1.35827e+09	1.4325e+09	1.44432e+09	1.42785e+09
High	High	Master Protein	P41250	Glycine--tRNA ligase OS=Homo sapiens GN=GARS PE=1 SV=3	0	0	55	37	845	37	1	739	83.1	7.03	18125	876.89	36	19	0	2.44029e+09	2.50255e+09	2.53507e+09	3.89426e+09	3.89161e+09	3944630883	3.9232e+09	4.00467e+09	4.04906e+09
High	High	Master Protein	P27695	DNA-(apurinic or apyrimidinic site) lyase OS=Homo sapiens GN=APEX1 PE=1 SV=2	0	0	66	22	576	22	1	318	35.5	8.12	12584	874.8	22	15	0	2.0826e+09	1.96729e+09	2.05104e+09	2.86549e+09	3.25593e+09	2.98321e+09	2.68006e+09	2.77793e+09	2.79742e+09
High	High	Master Protein	Q15075	Early endosome antigen 1 OS=Homo sapiens GN=EEA1 PE=1 SV=2	0	0	63	86	831	86	1	1411	162.4	5.68	17780	873.17	85	44	0	8.16413e+08	8.05161e+08	8.26203e+08	9.5568e+08	9.68902e+08	9.72479e+08	1.0208e+09	1.0874e+09	1.04625e+09
High	High	Master Protein	P49411	Elongation factor Tu, mitochondrial OS=Homo sapiens GN=TUFM PE=1 SV=2	0	0	73	34	809	34	1	452	49.5	7.61	17885	873.16	34	20	0	2.28878e+09	2.25807e+09	2.36379e+09	2.58458e+09	2.94425e+09	2.8717e+09	3.50745e+09	3.49768e+09	3.52057e+09
High	High	Master Protein	Q92538	Golgi-specific brefeldin A-resistance guanine nucleotide exchange factor 1 OS=Homo sapiens GN=GBF1 PE=1 SV=2	0	0	48	67	802	67	1	1859	206.3	5.73	17599	872.91	66	33	0	4.40849e+08	4.35633e+08	4.57746e+08	5.39366e+08	5.70462e+08	5.64675e+08	7.14866e+08	6.47329e+08	6.35197e+08
High	High	Master Protein	Q9Y265	RuvB-like 1 OS=Homo sapiens GN=RUVBL1 PE=1 SV=1	0	0	73	29	656	29	1	456	50.2	6.42	14444	871.27	29	21	0	1.66819e+09	1.51962e+09	1.61507e+09	1.95456e+09	1.93902e+09	1.98924e+09	2.08517e+09	2.17055e+09	2.29814e+09
High	High	Master Protein	Q1KMD3	Heterogeneous nuclear ribonucleoprotein U-like protein 2 OS=Homo sapiens GN=HNRNPUL2 PE=1 SV=1	0	0	56	45	814	45	1	747	85.1	4.91	20751	869.73	45	23	0	1.27729e+09	1.27924e+09	1.291e+09	1.59782e+09	1.70822e+09	1.62379e+09	1.8173e+09	1.70049e+09	1.75459e+09
High	High	Master Protein	P62937	Peptidyl-prolyl cis-trans isomerase A OS=Homo sapiens GN=PPIA PE=1 SV=2	0	0	86	14	1259	14	1	165	18	7.81	36988	867.76	13	7	0	2.42156e+10	2.02086e+10	2.16645e+10	2.66119e+10	2.91178e+10	2.60604e+10	2.50802e+10	2.51544e+10	3.00734e+10	Acetyl [N-Term; N-Term]
High	High	Master Protein	P51148	Ras-related protein Rab-5C OS=Homo sapiens GN=RAB5C PE=1 SV=2	0	0	79	13	558	10	1	216	23.5	8.41	13425	867.54	13	9	3	8.41478e+08	8.00545e+08	8.57916e+08	7.8965e+08	9.6103e+08	9.09176e+08	9.87377e+08	1.0848e+09	1.05219e+09
High	High	Master Protein	O60716	Catenin delta-1 OS=Homo sapiens GN=CTNND1 PE=1 SV=1	0	0	60	53	762	53	1	968	108.1	6.23	19062	867.52	53	27	0	9.53048e+08	9.54057e+08	1.01866e+09	1.32294e+09	1.48518e+09	1.38578e+09	1.4224e+09	1.42804e+09	1.46261e+09
High	High	Master Protein	Q5VYK3	Proteasome-associated protein ECM29 homolog OS=Homo sapiens GN=ECM29 PE=1 SV=2	0	0	54	79	902	79	1	1845	204.2	7.12	20923	866.04	77	41	0	8.84508e+08	8.66127e+08	8.96197e+08	1.07291e+09	1.17763e+09	1.12327e+09	1.21997e+09	1.27535e+09	1.22582e+09	Acetyl [N-Term]
High	High	Master Protein	P12004	Proliferating cell nuclear antigen OS=Homo sapiens GN=PCNA PE=1 SV=1	0	0	89	21	607	21	1	261	28.8	4.69	12604	864.74	20	11	0	2.82523e+09	2.80436e+09	2.95358e+09	3.22585e+09	3.25214e+09	3.19752e+09	2.80394e+09	2.82362e+09	2.87401e+09
High	High	Master Protein	P11940	Polyadenylate-binding protein 1 OS=Homo sapiens GN=PABPC1 PE=1 SV=2	0	0	67	39	1216	10	1	636	70.6	9.5	30194	864.3	39	18	39	5.85091e+09	5.68511e+09	6.18533e+09	6.71079e+09	7.26826e+09	7.40979e+09	7.48019e+09	7817262544	8.1841e+09	Acetyl [N-Term]
High	High	Master Protein	O15027	Protein transport protein Sec16A OS=Homo sapiens GN=SEC16A PE=1 SV=3	0	0	51	73	783	73	1	2179	233.4	5.63	18933	863.56	72	39	0	6.62379e+08	6.50843e+08	6.74959e+08	8.45708e+08	9.21021e+08	9.67912e+08	9.15563e+08	1.00918e+09	9.70759e+08
High	High	Master Protein	Q9NZB2	Constitutive coactivator of PPAR-gamma-like protein 1 OS=Homo sapiens GN=FAM120A PE=1 SV=2	0	0	63	52	680	51	1	1118	121.8	8.88	15832	863.24	52	34	1	5.98744e+08	6.03465e+08	5.97103e+08	8.46035e+08	7.89991e+08	8.7922e+08	9.12865e+08	9.34335e+08	9.73805e+08
High	High	Master Protein	Q9ULT8	E3 ubiquitin-protein ligase HECTD1 OS=Homo sapiens GN=HECTD1 PE=1 SV=3	0	0	42	88	768	88	1	2610	289.2	5.35	19094	861.08	85	41	0	3.43641e+08	3.35392e+08	3.42601e+08	459369355	4.61979e+08	4.78653e+08	5.86793e+08	6.11001e+08	6.28403e+08
High	High	Master Protein	P61221	ATP-binding cassette sub-family E member 1 OS=Homo sapiens GN=ABCE1 PE=1 SV=1	0	0	62	37	622	37	1	599	67.3	8.34	12987	856.33	37	21	0	1.02001e+09	1.04295e+09	1.08498e+09	1.25469e+09	1.32808e+09	1.35936e+09	1.40798e+09	1.4368e+09	1520545750
High	High	Master Protein	Q8N163	Cell cycle and apoptosis regulator protein 2 OS=Homo sapiens GN=CCAR2 PE=1 SV=2	0	0	68	59	906	59	1	923	102.8	5.22	21699	856.05	58	33	0	1.43046e+09	1.38628e+09	1.49758e+09	1.92701e+09	1.93695e+09	2.05611e+09	1.97827e+09	1.99633e+09	2.06811e+09
High	High	Master Protein	P52948	Nuclear pore complex protein Nup98-Nup96 OS=Homo sapiens GN=NUP98 PE=1 SV=4	0	0	46	72	788	72	1	1817	197.5	6.4	18578	855.16	71	39	0	5.55312e+08	5.42675e+08	5.55598e+08	7.18077e+08	7.03838e+08	7.09715e+08	7.59256e+08	7.70282e+08	7.78025e+08
High	High	Master Protein	Q96A49	Synapse-associated protein 1 OS=Homo sapiens GN=SYAP1 PE=1 SV=1	0	0	60	21	487	21	1	352	39.9	4.53	11060	850.05	20	15	0	3.39938e+08	3.48828e+08	3.67016e+08	3.90073e+08	4.26399e+08	4.16122e+08	4.60866e+08	4.55012e+08	4.53117e+08
High	High	Master Protein	O14497	AT-rich interactive domain-containing protein 1A OS=Homo sapiens GN=ARID1A PE=1 SV=3	0	0	45	64	657	63	1	2285	241.9	6.7	14433	848.89	63	40	1	2.11292e+08	2.06129e+08	2.10921e+08	2.55677e+08	2.7604e+08	2.55054e+08	2.63024e+08	2.69344e+08	2.65108e+08	Acetyl [N-Term]
High	High	Master Protein	P49790	Nuclear pore complex protein Nup153 OS=Homo sapiens GN=NUP153 PE=1 SV=2	0	0	59	70	736	70	1	1475	153.8	8.73	17090	847.77	68	34	0	4.58806e+08	4.38173e+08	4.68338e+08	5.71483e+08	6.14098e+08	6.035e+08	6.08836e+08	6.38154e+08	6.49025e+08	Acetyl [N-Term]
High	High	Master Protein	P27816	Microtubule-associated protein 4 OS=Homo sapiens GN=MAP4 PE=1 SV=3	0	0	70	70	1160	70	1	1152	120.9	5.43	27649	846.15	70	26	0	2.42662e+09	2.35331e+09	2.39397e+09	3.26873e+09	3.3857e+09	3.29738e+09	3.38812e+09	3.48295e+09	3.59053e+09	Acetyl [N-Term]
High	High	Master Protein	P45974	Ubiquitin carboxyl-terminal hydrolase 5 OS=Homo sapiens GN=USP5 PE=1 SV=2	0	0	60	49	819	47	1	858	95.7	5.03	19576	844.06	49	28	2	1.564e+09	1.50375e+09	1.50281e+09	2.03011e+09	2.06429e+09	2.03799e+09	2.21416e+09	2.27992e+09	2.26761e+09	Acetyl [N-Term]
High	High	Master Protein	O15371	Eukaryotic translation initiation factor 3 subunit D OS=Homo sapiens GN=EIF3D PE=1 SV=1	0	0	67	33	676	33	1	548	63.9	6.05	13905	838.13	33	22	0	8.14442e+08	8.29447e+08	8.37596e+08	1.08271e+09	1.12411e+09	1.1166e+09	1.16052e+09	1.2856e+09	1.24617e+09
High	High	Master Protein	P42166	Lamina-associated polypeptide 2, isoform alpha OS=Homo sapiens GN=TMPO PE=1 SV=2	0	0	76	40	690	27	1	694	75.4	7.66	16646	838.12	39	27	13	1.06403e+09	1.03294e+09	1.0742e+09	1.15527e+09	1.1603e+09	1.23184e+09	1.25134e+09	1.24811e+09	1.27977e+09
High	High	Master Protein	P43490	Nicotinamide phosphoribosyltransferase OS=Homo sapiens GN=NAMPT PE=1 SV=1	0	0	70	28	547	28	1	491	55.5	7.15	11891	835.53	28	14	0	8.21947e+08	8.3431e+08	8.8434e+08	1.03911e+09	1.04251e+09	1.07715e+09	1.19641e+09	1.05775e+09	1.10962e+09	Acetyl [N-Term]
High	High	Master Protein	P08473	Neprilysin OS=Homo sapiens GN=MME PE=1 SV=2	0	0	54	39	694	39	1	750	85.5	5.73	14027	833.33	39	23	0	1.13121e+09	1.09722e+09	1.0634e+09	1.21733e+09	1.26893e+09	1298155116	1.27399e+09	1.34836e+09	1.34154e+09
High	High	Master Protein	Q6P996	Pyridoxal-dependent decarboxylase domain-containing protein 1 OS=Homo sapiens GN=PDXDC1 PE=1 SV=2	0	0	67	40	638	40	1	788	86.7	5.38	13747	832.18	40	24	0	6.37349e+08	6.68995e+08	6.97034e+08	8.25113e+08	8.22117e+08	8.45071e+08	9.53025e+08	9.32593e+08	9.2707e+08
High	High	Master Protein	O75534	Cold shock domain-containing protein E1 OS=Homo sapiens GN=CSDE1 PE=1 SV=2	0	0	60	46	827	46	1	798	88.8	6.25	18621	829.11	46	19	0	1.81868e+09	1.7841e+09	1.84678e+09	2.36988e+09	2.39625e+09	2.44141e+09	2.73341e+09	2.8916e+09	2.83642e+09	Acetyl [N-Term]
High	High	Master Protein	P55060	Exportin-2 OS=Homo sapiens GN=CSE1L PE=1 SV=3	0	0	51	47	1023	47	1	971	110.3	5.77	25287	828.51	47	19	0	3.04564e+09	3.01165e+09	3.04229e+09	3.38107e+09	3.31829e+09	3.42168e+09	3.52447e+09	3.56739e+09	3.53146e+09	Acetyl [N-Term]
High	High	Master Protein	Q9UBB4	Ataxin-10 OS=Homo sapiens GN=ATXN10 PE=1 SV=1	0	0	64	26	659	26	1	475	53.5	5.25	16605	827.24	26	16	0	8.64656e+08	8.09296e+08	8.18917e+08	1.03621e+09	1.09526e+09	1.05332e+09	1.28188e+09	1.26302e+09	1.27443e+09
High	High	Master Protein	Q14444	Caprin-1 OS=Homo sapiens GN=CAPRIN1 PE=1 SV=2	0	0	59	27	708	27	1	709	78.3	5.25	15167	825.97	27	15	0	1.54261e+09	1.47102e+09	1.59964e+09	1.86814e+09	1.95218e+09	1.98871e+09	2.15275e+09	2.2659e+09	2.24872e+09
High	High	Master Protein	Q8NE71	ATP-binding cassette sub-family F member 1 OS=Homo sapiens GN=ABCF1 PE=1 SV=2	0	0	49	37	680	37	1	845	95.9	6.8	15359	824.59	36	23	0	5.51193e+08	5.37169e+08	5.70863e+08	6.8385e+08	7.27894e+08	7.25577e+08	6.75413e+08	7.37603e+08	7.60398e+08
High	High	Master Protein	P04792	Heat shock protein beta-1 OS=Homo sapiens GN=HSPB1 PE=1 SV=2	0	0	91	21	661	21	1	205	22.8	6.4	15012	823.21	21	10	0	5.52976e+09	5.26679e+09	5.50003e+09	6.49243e+09	7.20691e+09	6.71602e+09	7.32578e+09	7.51106e+09	7.76236e+09
High	High	Master Protein	Q9UHX1	Poly(U)-binding-splicing factor PUF60 OS=Homo sapiens GN=PUF60 PE=1 SV=1	0	0	61	26	688	26	1	559	59.8	5.29	16026	822.8	26	13	0	8.85288e+08	9.3488e+08	9.77295e+08	1.16751e+09	1.24163e+09	1.19619e+09	1.29812e+09	1.24976e+09	1.3109e+09
High	High	Master Protein	Q8IWJ2	GRIP and coiled-coil domain-containing protein 2 OS=Homo sapiens GN=GCC2 PE=1 SV=4	0	0	55	87	818	83	1	1684	195.8	5.14	18358	822.67	85	38	3	3.14101e+08	3.02688e+08	3.0883e+08	4.62773e+08	4.73047e+08	4.84535e+08	4.57804e+08	4.80472e+08	4.75278e+08	Acetyl [N-Term]
High	High	Master Protein	P48637	Glutathione synthetase OS=Homo sapiens GN=GSS PE=1 SV=1	0	0	66	28	612	28	1	474	52.4	5.92	14013	821.35	28	13	0	1.528e+09	1.4937e+09	1.57366e+09	1.98018e+09	2.02657e+09	1.99329e+09	2.26005e+09	2.33246e+09	2.33778e+09	Acetyl [N-Term]
High	High	Master Protein	P35237	Serpin B6 OS=Homo sapiens GN=SERPINB6 PE=1 SV=3	0	0	70	21	729	20	1	376	42.6	5.27	17578	819.18	21	14	1	1.52993e+09	1.50531e+09	1.569e+09	1.93972e+09	1.94172e+09	2.06152e+09	2.09383e+09	2.11892e+09	2.18201e+09
High	High	Master Protein	P26641	Elongation factor 1-gamma OS=Homo sapiens GN=EEF1G PE=1 SV=3	0	0	67	28	843	28	1	437	50.1	6.67	16874	818.68	27	15	0	5.94253e+09	5.68349e+09	6.06037e+09	6.75243e+09	6.8767e+09	7.31784e+09	7.73383e+09	7.80012e+09	7.82819e+09	Acetyl [N-Term]
High	High	Master Protein	P19338	Nucleolin OS=Homo sapiens GN=NCL PE=1 SV=3	0	0	38	32	1233	32	1	710	76.6	4.7	29972	816.85	32	9	0	1.3345e+10	1.24713e+10	1.34886e+10	1.60571e+10	1.67195e+10	1.7208e+10	1.79487e+10	1.86696e+10	1.90975e+10
High	High	Master Protein	Q9NTJ3	Structural maintenance of chromosomes protein 4 OS=Homo sapiens GN=SMC4 PE=1 SV=2	0	0	55	69	799	69	1	1288	147.1	6.79	18600	813.49	69	35	0	9.06585e+08	8.57852e+08	8.95941e+08	8.581e+08	8.5239e+08	8.8014e+08	9.29724e+08	9.65491e+08	9.69233e+08
High	High	Master Protein	P28331	NADH-ubiquinone oxidoreductase 75 kDa subunit, mitochondrial OS=Homo sapiens GN=NDUFS1 PE=1 SV=3	0	0	69	37	615	37	1	727	79.4	6.23	13054	812.13	37	25	0	5.14902e+08	5.36207e+08	5.04912e+08	7.05307e+08	7.20564e+08	7.08474e+08	8.48543e+08	8.44233e+08	8.67691e+08
High	High	Master Protein	P11216	Glycogen phosphorylase, brain form OS=Homo sapiens GN=PYGB PE=1 SV=5	0	0	63	53	745	42	1	843	96.6	6.86	16083	811.31	53	26	13	1.30746e+09	1.36812e+09	1.39253e+09	1.54226e+09	1.66296e+09	1.6611e+09	1.88341e+09	1.92884e+09	1.86161e+09
High	High	Master Protein	Q14676	Mediator of DNA damage checkpoint protein 1 OS=Homo sapiens GN=MDC1 PE=1 SV=3	0	0	51	66	593	66	1	2089	226.5	5.47	12509	810.99	63	33	0	2.82431e+08	2.76065e+08	2.81896e+08	2.82649e+08	3.01958e+08	2.93922e+08	2.97663e+08	3.05949e+08	3.21234e+08
High	High	Master Protein	Q9Y230	RuvB-like 2 OS=Homo sapiens GN=RUVBL2 PE=1 SV=3	0	0	68	32	691	32	1	463	51.1	5.64	16667	810.91	31	18	0	1.55686e+09	1.57625e+09	1.64553e+09	1.90389e+09	1.92553e+09	1.99012e+09	2.1119e+09	2.00785e+09	2.12662e+09	Acetyl [N-Term]
High	High	Master Protein	Q16822	Phosphoenolpyruvate carboxykinase [GTP], mitochondrial OS=Homo sapiens GN=PCK2 PE=1 SV=3	0	0	67	46	778	42	1	640	70.7	7.62	17184	809.66	46	22	4	1.39693e+09	1.42549e+09	1.39036e+09	1.98027e+09	2.01451e+09	1.97639e+09	2.35852e+09	2.40034e+09	2.4863e+09
High	High	Master Protein	P32969	60S ribosomal protein L9 OS=Homo sapiens GN=RPL9 PE=1 SV=1	0	0	62	12	483	12	1	192	21.9	9.95	9054	807.01	12	10	0	9.63245e+08	9.09646e+08	9.81622e+08	1.42032e+09	1.32379e+09	1.34041e+09	1.39573e+09	1.38919e+09	1.41584e+09
High	High	Master Protein	Q9UHB9	Signal recognition particle subunit SRP68 OS=Homo sapiens GN=SRP68 PE=1 SV=2	0	0	71	42	700	42	1	627	70.7	8.56	19069	806.57	40	24	0	7.88821e+08	7.52777e+08	8.00381e+08	9.55185e+08	1.02178e+09	9.94688e+08	1.09801e+09	1.16887e+09	1.16046e+09	Acetyl [N-Term]
High	High	Master Protein	P11047	Laminin subunit gamma-1 OS=Homo sapiens GN=LAMC1 PE=1 SV=3	0	0	57	65	748	65	1	1609	177.5	5.12	17890	806.08	65	37	0	3.61805e+08	3.56651e+08	3.75326e+08	5.52608e+08	6.00936e+08	6.01065e+08	1.15194e+09	1.04943e+09	1.06895e+09
High	High	Master Protein	P61011	Signal recognition particle 54 kDa protein OS=Homo sapiens GN=SRP54 PE=1 SV=1	0	0	60	28	642	28	1	504	55.7	8.75	13455	805.55	26	19	0	8.69908e+08	8.58442e+08	8.36169e+08	1.11243e+09	1.16654e+09	1.14436e+09	1.26715e+09	1.24677e+09	1.19265e+09
High	High	Master Protein	Q15436	Protein transport protein Sec23A OS=Homo sapiens GN=SEC23A PE=1 SV=2	0	0	56	32	631	29	1	765	86.1	7.08	14300	804.22	32	19	0	5.06993e+08	5.01665e+08	5.1451e+08	7.19407e+08	7.34003e+08	7.23078e+08	7.74958e+08	7.67273e+08	7.61936e+08	Acetyl [N-Term]
High	High	Master Protein	P46777	60S ribosomal protein L5 OS=Homo sapiens GN=RPL5 PE=1 SV=3	0	0	59	17	762	17	1	297	34.3	9.72	16117	803.88	17	10	0	4.06599e+09	3.97288e+09	3.89421e+09	4.1976e+09	4.25284e+09	4.51583e+09	4.90298e+09	5.28876e+09	5.11891e+09
High	High	Master Protein	P14868	Aspartate--tRNA ligase, cytoplasmic OS=Homo sapiens GN=DARS PE=1 SV=2	0	0	77	42	968	42	1	501	57.1	6.55	23763	801.48	42	19	0	2.29497e+09	2.31565e+09	2.46014e+09	2.96629e+09	3.19796e+09	3.28465e+09	3.21557e+09	3.43604e+09	3.4911e+09
High	High	Master Protein	P27348	14-3-3 protein theta OS=Homo sapiens GN=YWHAQ PE=1 SV=1	0	0	72	21	888	14	1	245	27.7	4.78	20956	799.09	21	8	2	3.65252e+09	3.64738e+09	3.50689e+09	4.72785e+09	4.77743e+09	4.67046e+09	5.05711e+09	4.94489e+09	5.29505e+09
High	High	Master Protein	P00441	Superoxide dismutase [Cu-Zn] OS=Homo sapiens GN=SOD1 PE=1 SV=2	0	0	81	12	512	12	1	154	15.9	6.13	12786	798.55	11	7	0	2.16371e+09	1.93816e+09	1.80525e+09	3.07351e+09	3.20477e+09	3.34478e+09	3.38822e+09	3.4829e+09	3.3547e+09
High	High	Master Protein	O00567	Nucleolar protein 56 OS=Homo sapiens GN=NOP56 PE=1 SV=4	0	0	67	35	623	35	1	594	66	9.19	14451	797.45	33	20	0	8.14122e+08	7.80441e+08	8.36938e+08	1.12053e+09	1.24774e+09	1.27647e+09	1.16708e+09	1.23372e+09	1.2098e+09
High	High	Master Protein	Q9BVP2	Guanine nucleotide-binding protein-like 3 OS=Homo sapiens GN=GNL3 PE=1 SV=2	0	0	53	35	601	34	1	549	62	9.16	14350	794.22	33	17	1	5.88322e+08	5.87305e+08	6.76997e+08	7.29371e+08	8.3487e+08	8.35756e+08	8.85702e+08	8.72011e+08	9.27571e+08
High	High	Master Protein	Q16881	Thioredoxin reductase 1, cytoplasmic OS=Homo sapiens GN=TXNRD1 PE=1 SV=3	0	0	57	26	567	25	1	649	70.9	7.39	12207	791.72	26	19	1	1.01426e+09	9.73278e+08	1.05985e+09	1.88684e+09	1.89278e+09	1.87683e+09	2.01928e+09	2107023495	2.14554e+09
High	High	Master Protein	O75367	Core histone macro-H2A.1 OS=Homo sapiens GN=H2AFY PE=1 SV=4	0	0	51	20	633	18	1	372	39.6	9.79	15740	790.7	20	10	2	1.72065e+09	1.77572e+09	1.91329e+09	2.25989e+09	2.39161e+09	2.49927e+09	2.69671e+09	2.83578e+09	2.97234e+09
High	High	Master Protein	P20290	Transcription factor BTF3 OS=Homo sapiens GN=BTF3 PE=1 SV=1	0	0	77	15	532	14	1	206	22.2	9.38	12773	790.1	15	7	1	6.09193e+08	5.81836e+08	6.08441e+08	8.48101e+08	8.95812e+08	8.53231e+08	1.08509e+09	1.18321e+09	1.17344e+09
High	High	Master Protein	P63241	Eukaryotic translation initiation factor 5A-1 OS=Homo sapiens GN=EIF5A PE=1 SV=2	0	0	81	13	610	9	1	154	16.8	5.24	14920	789.51	13	8	6	3.23463e+09	2.54654e+09	2.495e+09	3.10576e+09	3.29027e+09	2.96435e+09	3.31285e+09	3.11805e+09	3.067e+09	Acetyl [N-Term]
High	High	Master Protein	Q8TEX9	Importin-4 OS=Homo sapiens GN=IPO4 PE=1 SV=2	0	0	53	45	612	45	1	1081	118.6	4.96	14857	788.78	44	20	0	6.219e+08	6.03811e+08	6.03689e+08	7.51259e+08	7.81429e+08	7.49971e+08	9.05568e+08	8.60996e+08	9.22944e+08	Acetyl [N-Term]
High	High	Master Protein	P18669	Phosphoglycerate mutase 1 OS=Homo sapiens GN=PGAM1 PE=1 SV=2	0	0	69	17	668	17	1	254	28.8	7.18	14020	788.13	17	12	0	5.0473e+09	5.10323e+09	4.87157e+09	6.28349e+09	6.35467e+09	7.10369e+09	6.59497e+09	6.80053e+09	6.6061e+09
High	High	Master Protein	P54577	Tyrosine--tRNA ligase, cytoplasmic OS=Homo sapiens GN=YARS PE=1 SV=4	0	0	78	46	853	46	1	528	59.1	7.05	18592	788.02	46	22	0	2.4366e+09	2.29474e+09	2.43101e+09	3.26418e+09	3.48407e+09	3.43602e+09	3.77949e+09	3.71354e+09	3.77197e+09	Acetyl [N-Term]
High	High	Master Protein	O43290	U4/U6.U5 tri-snRNP-associated protein 1 OS=Homo sapiens GN=SART1 PE=1 SV=1	0	0	54	42	588	42	1	800	90.2	6.13	15517	782.79	41	21	0	3.7445e+08	3.58173e+08	3.97706e+08	4.01498e+08	4.50119e+08	4.36924e+08	4.70595e+08	5.03814e+08	4.90897e+08
High	High	Master Protein	Q6PKG0	La-related protein 1 OS=Homo sapiens GN=LARP1 PE=1 SV=2	0	0	67	69	804	61	1	1096	123.4	8.82	17998	779.86	68	27	9	1.08706e+09	1.05832e+09	1.20844e+09	1.42536e+09	1.54206e+09	1.53252e+09	1.54246e+09	1.60278e+09	1.62817e+09	Acetyl [N-Term]
High	High	Master Protein	O00429	Dynamin-1-like protein OS=Homo sapiens GN=DNM1L PE=1 SV=2	0	0	78	50	733	50	1	736	81.8	6.81	18967	774.76	49	23	0	7.25371e+08	7.10262e+08	7.61741e+08	9.25085e+08	9.51238e+08	9.47138e+08	9.8831e+08	9.50538e+08	1.01535e+09	Acetyl [N-Term]
High	High	Master Protein	Q13439	Golgin subfamily A member 4 OS=Homo sapiens GN=GOLGA4 PE=1 SV=1	0	0	53	114	809	112	1	2230	261	5.39	17254	774.32	113	49	1	3.45594e+08	3.32955e+08	3.44773e+08	4.72977e+08	4.93739e+08	4.9975e+08	5.33394e+08	5.51246e+08	5.56311e+08
High	High	Master Protein	P55209	Nucleosome assembly protein 1-like 1 OS=Homo sapiens GN=NAP1L1 PE=1 SV=1	0	0	52	20	586	18	1	391	45.3	4.46	11368	773.45	20	11	2	2.09173e+09	2.14272e+09	2.17938e+09	2.55498e+09	2.72516e+09	2.6715e+09	3.36322e+09	3.62905e+09	3.38485e+09	Acetyl [N-Term]
High	High	Master Protein	O75874	Isocitrate dehydrogenase [NADP] cytoplasmic OS=Homo sapiens GN=IDH1 PE=1 SV=2	0	0	67	24	871	22	1	414	46.6	7.01	25014	771.56	24	12	0	3.78178e+09	3.46707e+09	3.80265e+09	4.29193e+09	4.12345e+09	4.2182e+09	4.75386e+09	4.88912e+09	4.7502e+09
High	High	Master Protein	P50570	Dynamin-2 OS=Homo sapiens GN=DNM2 PE=1 SV=2	0	0	55	47	650	38	1	870	98	7.44	13435	771.29	47	17	10	6.48081e+08	6.85262e+08	6.25734e+08	8.26737e+08	8.67865e+08	8.60769e+08	8.80063e+08	9.54824e+08	8.75464e+08
High	High	Master Protein	P51610	Host cell factor 1 OS=Homo sapiens GN=HCFC1 PE=1 SV=2	0	0	41	61	737	60	1	2035	208.6	7.46	16752	769.48	61	33	1	6.26975e+08	6.06718e+08	6.77297e+08	8.13472e+08	8.58851e+08	8.58822e+08	8.61353e+08	9.79502e+08	9.29804e+08	Acetyl [N-Term]
High	High	Master Protein	Q15019	Septin-2 OS=Homo sapiens GN=SEPT2 PE=1 SV=1	0	0	67	21	566	21	1	361	41.5	6.6	13243	768.66	21	14	0	8.01445e+08	7.96902e+08	8.72759e+08	9.58278e+08	9.10064e+08	1.04792e+09	9.68163e+08	1.04242e+09	9.90415e+08
High	High	Master Protein	Q9P258	Protein RCC2 OS=Homo sapiens GN=RCC2 PE=1 SV=2	0	0	69	29	549	29	1	522	56	8.78	12698	768.62	28	16	0	7.33509e+08	6.94723e+08	7.39931e+08	1.01115e+09	9.67957e+08	1.0093e+09	1.00248e+09	1.07602e+09	1.12708e+09
High	High	Master Protein	P08243	Asparagine synthetase [glutamine-hydrolyzing] OS=Homo sapiens GN=ASNS PE=1 SV=4	0	0	65	32	777	32	1	561	64.3	6.86	16946	768.58	31	17	0	1.93967e+09	1.84756e+09	2.05422e+09	2.70495e+09	3.05044e+09	2.92861e+09	3.38247e+09	3.47867e+09	3.41779e+09
High	High	Master Protein	Q16891	MICOS complex subunit MIC60 OS=Homo sapiens GN=IMMT PE=1 SV=1	0	0	69	59	740	59	1	758	83.6	6.48	17081	767.38	58	28	0	7.68203e+08	7.88218e+08	8.34193e+08	9.46587e+08	1.01481e+09	1.00433e+09	1.26545e+09	1.31812e+09	1.25656e+09
High	High	Master Protein	Q7L014	Probable ATP-dependent RNA helicase DDX46 OS=Homo sapiens GN=DDX46 PE=1 SV=2	0	0	51	57	760	54	1	1031	117.3	9.29	16963	766.94	56	27	3	7.45408e+08	7.33435e+08	7.86206e+08	8.69042e+08	9.12902e+08	9.19601e+08	1.0291e+09	1.07251e+09	1.05812e+09
High	High	Master Protein	P46459	Vesicle-fusing ATPase OS=Homo sapiens GN=NSF PE=1 SV=3	0	0	62	44	710	43	1	744	82.5	6.95	14916	765.97	44	22	2	1.29796e+09	1.27153e+09	1.3129e+09	1.65876e+09	1.8106e+09	1.71673e+09	1.74675e+09	1.75567e+09	1.84288e+09
High	High	Master Protein	P22234	Multifunctional protein ADE2 OS=Homo sapiens GN=PAICS PE=1 SV=3	0	0	63	24	696	24	1	425	47	7.23	17459	763.94	24	10	0	3.65145e+09	3.82954e+09	3.50408e+09	4.72116e+09	4.62842e+09	4.58044e+09	4.89661e+09	4.67728e+09	4.90004e+09	Acetyl [N-Term]
High	High	Master Protein	P55265	Double-stranded RNA-specific adenosine deaminase OS=Homo sapiens GN=ADAR PE=1 SV=4	0	0	53	57	780	57	1	1226	136	8.65	18509	761.38	57	23	0	1.14966e+09	1.05019e+09	1.14178e+09	1.37229e+09	1.41252e+09	1.40231e+09	1.45678e+09	1.48145e+09	1.4688e+09
High	High	Master Protein	P04040	Catalase OS=Homo sapiens GN=CAT PE=1 SV=3	0	0	70	32	626	32	1	527	59.7	7.39	15730	761.34	32	16	0	1.19503e+09	1.23164e+09	1.26248e+09	1.41024e+09	1.53818e+09	1.59482e+09	1.46541e+09	1.48143e+09	1.56383e+09	Acetyl [N-Term]
High	High	Master Protein	P78344	Eukaryotic translation initiation factor 4 gamma 2 OS=Homo sapiens GN=EIF4G2 PE=1 SV=1	0	0	62	53	798	53	1	907	102.3	7.14	18870	761.29	53	20	0	1.13718e+09	1.11665e+09	1.15342e+09	1.47899e+09	1.54794e+09	1.55506e+09	1.6065e+09	1.68927e+09	1.73881e+09	Acetyl [N-Term]
High	High	Master Protein	Q9Y2X3	Nucleolar protein 58 OS=Homo sapiens GN=NOP58 PE=1 SV=1	0	0	56	27	745	27	1	529	59.5	8.92	19090	759.51	27	17	0	6.64783e+08	6.39774e+08	7.25412e+08	9.11013e+08	1.0122e+09	9.79953e+08	9.79728e+08	1.06635e+09	1.09892e+09
High	High	Master Protein	P55809	Succinyl-CoA:3-ketoacid coenzyme A transferase 1, mitochondrial OS=Homo sapiens GN=OXCT1 PE=1 SV=1	0	0	53	22	572	22	1	520	56.1	7.46	13711	759.19	22	13	0	5.56918e+08	5.57853e+08	5.92006e+08	7.63647e+08	8.05279e+08	7.99141e+08	9.55648e+08	9.67969e+08	1.01233e+09
High	High	Master Protein	P57721	Poly(rC)-binding protein 3 OS=Homo sapiens GN=PCBP3 PE=2 SV=2	0	0	22	7	489	1	1	371	39.4	8.07	9877	757.76	7	4	0	9.18617e+07	8.53537e+07	9.63367e+07	1.27729e+08	1.27636e+08	1.42462e+08	1.51538e+08	156464050	140514318
High	High	Master Protein	Q5JSZ5	Protein PRRC2B OS=Homo sapiens GN=PRRC2B PE=1 SV=2	0	0	50	76	704	73	1	2229	242.8	8.34	17947	756.4	72	42	0	2.15682e+08	2.21341e+08	2.24997e+08	3.03335e+08	3.02614e+08	3.19296e+08	3.05114e+08	2.94176e+08	3.20671e+08
High	High	Master Protein	P04843	Dolichyl-diphosphooligosaccharide--protein glycosyltransferase subunit 1 OS=Homo sapiens GN=RPN1 PE=1 SV=1	0	0	64	36	676	36	1	607	68.5	6.38	15803	754.29	35	19	0	2.12963e+09	2.10997e+09	2.12067e+09	2.42943e+09	2.54479e+09	2.7044e+09	3.0935e+09	3.12134e+09	3.14298e+09
High	High	Master Protein	P09110	3-ketoacyl-CoA thiolase, peroxisomal OS=Homo sapiens GN=ACAA1 PE=1 SV=2	0	0	71	19	434	19	1	424	44.3	8.44	11262	753.76	19	17	0	4.82461e+08	4.91626e+08	4.90604e+08	5.70699e+08	5.93265e+08	6.0781e+08	6.60035e+08	6.54423e+08	6.87979e+08
High	High	Master Protein	O00267	Transcription elongation factor SPT5 OS=Homo sapiens GN=SUPT5H PE=1 SV=1	0	0	51	46	593	46	1	1087	120.9	5.06	13592	753.67	45	29	0	4.68382e+08	4.90366e+08	4.70308e+08	5.90248e+08	5.56841e+08	5.67275e+08	6.01743e+08	5.96056e+08	6.49488e+08
High	High	Master Protein	Q15437	Protein transport protein Sec23B OS=Homo sapiens GN=SEC23B PE=1 SV=2	0	0	67	35	649	32	1	767	86.4	6.89	13849	750.88	35	18	4	7.26416e+08	6.76458e+08	7.58937e+08	9.63059e+08	1.04129e+09	1.06089e+09	9.86954e+08	9.82847e+08	1.03868e+09	Acetyl [N-Term]
High	High	Master Protein	Q8WVM8	Sec1 family domain-containing protein 1 OS=Homo sapiens GN=SCFD1 PE=1 SV=4	0	0	55	30	660	30	1	642	72.3	6.27	16812	750.02	30	19	0	5.47213e+08	5.69126e+08	5.9328e+08	7.38273e+08	7.51773e+08	7.46807e+08	816595417	8.34866e+08	7.88369e+08	Acetyl [N-Term]
High	High	Master Protein	P61247	40S ribosomal protein S3a OS=Homo sapiens GN=RPS3A PE=1 SV=2	0	0	65	23	692	23	1	264	29.9	9.73	15963	747.09	23	8	0	4.40721e+09	4.29484e+09	4.46222e+09	5.83505e+09	5.95993e+09	6.18527e+09	6.75932e+09	6.69207e+09	7.02907e+09
High	High	Master Protein	P82970	High mobility group nucleosome-binding domain-containing protein 5 OS=Homo sapiens GN=HMGN5 PE=1 SV=1	0	0	65	21	581	21	1	282	31.5	4.55	15168	746.53	21	11	0	2.22494e+08	2.43653e+08	2.17838e+08	2.51034e+08	2.41677e+08	2.4062e+08	2.61366e+08	3.46753e+08	3.48742e+08
High	High	Master Protein	O95757	Heat shock 70 kDa protein 4L OS=Homo sapiens GN=HSPA4L PE=1 SV=3	0	0	63	44	640	40	1	839	94.5	5.88	15126	746.16	43	24	0	3.19929e+08	3.13215e+08	325833776	3.63975e+08	3.8061e+08	3.65277e+08	4.22456e+08	4.37609e+08	4.10723e+08
High	High	Master Protein	P42167	Lamina-associated polypeptide 2, isoforms beta/gamma OS=Homo sapiens GN=TMPO PE=1 SV=2	0	0	59	23	568	10	1	454	50.6	9.38	13569	745.56	23	17	0	1.88852e+08	1.7251e+08	1.80561e+08	2.33271e+08	2.488e+08	2.62601e+08	2.57553e+08	2.78645e+08	2.90281e+08
High	High	Master Protein	Q05086	Ubiquitin-protein ligase E3A OS=Homo sapiens GN=UBE3A PE=1 SV=4	0	0	54	42	568	41	1	875	100.6	5.22	13901	744.87	40	25	1	3.46655e+08	3.29772e+08	3.51962e+08	4.52968e+08	5.07619e+08	4.7985e+08	5.38589e+08	5.18527e+08	5.24476e+08
High	High	Master Protein	P49915	GMP synthase [glutamine-hydrolyzing] OS=Homo sapiens GN=GMPS PE=1 SV=1	0	0	72	48	749	48	1	693	76.7	6.87	15684	744.47	47	23	0	1.31771e+09	1.25277e+09	1.49876e+09	1.60319e+09	1.70118e+09	1.6583e+09	1.69705e+09	1.76802e+09	1.6959e+09	Acetyl [N-Term]
High	High	Master Protein	P22059	Oxysterol-binding protein 1 OS=Homo sapiens GN=OSBP PE=1 SV=1	0	0	54	41	731	37	1	807	89.4	7.3	16133	743.28	40	23	6	9.25878e+08	8.74633e+08	8.881e+08	1.21771e+09	1.26886e+09	1.29615e+09	1.25766e+09	1.31336e+09	1.3724e+09
High	High	Master Protein	A5YKK6	CCR4-NOT transcription complex subunit 1 OS=Homo sapiens GN=CNOT1 PE=1 SV=2	0	0	45	89	782	89	1	2376	266.8	7.11	17193	742.07	88	44	0	6.16791e+08	6.09853e+08	6.31359e+08	7.47882e+08	7.54684e+08	7.34718e+08	7.92481e+08	8.74277e+08	8.6697e+08
High	High	Master Protein	P02751	Fibronectin OS=Homo sapiens GN=FN1 PE=1 SV=4	0	0	43	73	673	73	1	2386	262.5	5.71	13856	741.61	73	35	0	2.98479e+08	2.89571e+08	3.30013e+08	4.64235e+08	5.44569e+08	4.91554e+08	4.32528e+08	4.28715e+08	4.19301e+08
High	High	Master Protein	P33993	DNA replication licensing factor MCM7 OS=Homo sapiens GN=MCM7 PE=1 SV=4	0	0	72	47	752	47	1	719	81.3	6.46	16930	741.35	47	24	0	1.48358e+09	1.44032e+09	1.49475e+09	1.58545e+09	1571092802	1.61491e+09	1.41782e+09	1.42205e+09	1.45082e+09
High	High	Master Protein	Q5JPE7	Nodal modulator 2 OS=Homo sapiens GN=NOMO2 PE=1 SV=1	0	0	51	46	624	2	1	1267	139.4	5.76	12989	740.39	43	31	46	5.0465e+08	5.07627e+08	5.08162e+08	6.2861e+08	6.25204e+08	6.40199e+08	8.43097e+08	8.48022e+08	8.61488e+08
High	High	Master Protein	Q9Y6D6	Brefeldin A-inhibited guanine nucleotide-exchange protein 1 OS=Homo sapiens GN=ARFGEF1 PE=1 SV=2	0	0	44	62	647	48	1	1849	208.6	5.85	16127	739.48	62	31	15	3.67256e+08	3.37748e+08	3.42585e+08	4.16627e+08	4.49861e+08	4.35944e+08	4.40117e+08	4.53787e+08	4.46172e+08
High	High	Master Protein	P04844	Dolichyl-diphosphooligosaccharide--protein glycosyltransferase subunit 2 OS=Homo sapiens GN=RPN2 PE=1 SV=3	0	0	48	21	458	21	1	631	69.2	5.69	11418	738.87	21	15	0	4.79378e+08	4.96626e+08	5.21527e+08	6.01591e+08	6.15633e+08	6.668e+08	7.80051e+08	7.55388e+08	7.34035e+08
High	High	Master Protein	Q8IY81	pre-rRNA processing protein FTSJ3 OS=Homo sapiens GN=FTSJ3 PE=1 SV=2	0	0	58	41	609	41	1	847	96.5	8.4	14622	738.02	41	22	0	4.32581e+08	4.10639e+08	4.63068e+08	5.04611e+08	5.50084e+08	5.42656e+08	5.83965e+08	5.8975e+08	6.27046e+08
High	High	Master Protein	Q14257	Reticulocalbin-2 OS=Homo sapiens GN=RCN2 PE=1 SV=1	0	0	65	18	503	18	1	317	36.9	4.4	10418	736.03	18	11	0	8.81754e+08	8.14987e+08	8.4995e+08	1.06032e+09	1.14721e+09	1.15249e+09	1.31443e+09	1.41708e+09	1.41597e+09
High	High	Master Protein	O76094	Signal recognition particle subunit SRP72 OS=Homo sapiens GN=SRP72 PE=1 SV=3	0	0	70	41	640	41	1	671	74.6	9.26	16177	732.86	40	22	0	1.03932e+09	9.5711e+08	9.87634e+08	1.1936e+09	1.29095e+09	1.30974e+09	1.28527e+09	1.30765e+09	1.31216e+09	Acetyl [N-Term]
High	High	Master Protein	P22307	Non-specific lipid-transfer protein OS=Homo sapiens GN=SCP2 PE=1 SV=2	0	0	60	27	552	27	1	547	59	6.89	11012	732.11	27	14	0	1.0454e+09	9.92606e+08	1.08052e+09	1.27251e+09	1.21982e+09	1.28144e+09	1.43085e+09	1.39396e+09	1.52274e+09
High	High	Master Protein	Q9BWD1	Acetyl-CoA acetyltransferase, cytosolic OS=Homo sapiens GN=ACAT2 PE=1 SV=2	0	0	71	20	445	20	1	397	41.3	6.92	8356	731.15	20	13	0	9.55618e+08	8.68624e+08	9.02363e+08	1.19708e+09	1.1779e+09	1.19559e+09	1.17709e+09	1.1314e+09	1.25214e+09	Acetyl [N-Term]
High	High	Master Protein	Q07021	Complement component 1 Q subcomponent-binding protein, mitochondrial OS=Homo sapiens GN=C1QBP PE=1 SV=1	0	0	41	8	519	8	1	282	31.3	4.84	12393	731.07	8	6	0	1.50248e+09	1.6161e+09	1.66485e+09	1.84366e+09	1.83025e+09	2.18989e+09	2.53071e+09	2.38079e+09	2.40647e+09
High	High	Master Protein	Q9UMX0	Ubiquilin-1 OS=Homo sapiens GN=UBQLN1 PE=1 SV=2	0	0	48	18	563	9	1	589	62.5	5.11	12882	728.67	17	13	0	1.90841e+08	1.82387e+08	1.92476e+08	2.29554e+08	2.17597e+08	2.49955e+08	2.61447e+08	2.66523e+08	2.53954e+08	Acetyl [N-Term]
High	High	Master Protein	P26196	Probable ATP-dependent RNA helicase DDX6 OS=Homo sapiens GN=DDX6 PE=1 SV=2	0	0	72	29	594	29	1	483	54.4	8.66	12978	728.1	29	19	0	9.58718e+08	8.22357e+08	9.15708e+08	1.15302e+09	1.19991e+09	1.19073e+09	1.32173e+09	1.30661e+09	1.31477e+09
High	High	Master Protein	P18583	Protein SON OS=Homo sapiens GN=SON PE=1 SV=4	0	0	35	65	784	65	1	2426	263.7	5.64	16408	723.53	63	31	0	7.73521e+08	7.37816e+08	7.72563e+08	9.92038e+08	1.01707e+09	1.02774e+09	1.09777e+09	1.1668e+09	1.15441e+09	Acetyl [N-Term]
High	High	Master Protein	O00299	Chloride intracellular channel protein 1 OS=Homo sapiens GN=CLIC1 PE=1 SV=4	0	0	80	15	489	15	1	241	26.9	5.17	9793	720.96	15	10	0	1.2839e+09	1.30458e+09	1.27333e+09	1770243166	1.81798e+09	1.78754e+09	1.81072e+09	1.85913e+09	1.7388e+09	Acetyl [N-Term]
High	High	Master Protein	Q13045	Protein flightless-1 homolog OS=Homo sapiens GN=FLII PE=1 SV=2	0	0	50	56	695	56	1	1269	144.7	6.05	16637	720.6	55	29	0	7.4915e+08	7.06159e+08	7.28751e+08	8.9222e+08	9.38399e+08	9.09084e+08	7.77189e+08	7.7285e+08	8.00572e+08	Acetyl [N-Term]
High	High	Master Protein	Q15459	Splicing factor 3A subunit 1 OS=Homo sapiens GN=SF3A1 PE=1 SV=1	0	0	57	40	642	40	1	793	88.8	5.22	13053	720.48	40	24	0	1.12003e+09	1.02936e+09	1.12179e+09	1.27148e+09	1.33891e+09	1.40367e+09	1.34262e+09	1.38594e+09	1.34166e+09
High	High	Master Protein	Q9UHD9	Ubiquilin-2 OS=Homo sapiens GN=UBQLN2 PE=1 SV=2	0	0	40	19	510	13	1	624	65.7	5.22	12069	719.16	18	14	9	7.25625e+08	6.76903e+08	7.18899e+08	8.78588e+08	8.92247e+08	9.15615e+08	1.01066e+09	1.06638e+09	1.11533e+09	Acetyl [N-Term]
High	High	Master Protein	Q99497	Protein DJ-1 OS=Homo sapiens GN=PARK7 PE=1 SV=2	0	0	71	14	602	14	1	189	19.9	6.79	11709	717.45	14	9	0	5.71517e+09	5.83089e+09	5.5105e+09	7.10604e+09	7.11733e+09	7.7462e+09	7.29648e+09	8373060006	8.51237e+09
High	High	Master Protein	P30043	Flavin reductase (NADPH) OS=Homo sapiens GN=BLVRB PE=1 SV=3	0	0	66	10	497	10	1	206	22.1	7.65	12474	716.85	10	7	0	1.161e+09	1.11906e+09	1.14266e+09	1.36268e+09	1.52998e+09	1.24379e+09	1.58845e+09	1.53262e+09	1.58901e+09
High	High	Master Protein	P07195	L-lactate dehydrogenase B chain OS=Homo sapiens GN=LDHB PE=1 SV=2	0	0	56	20	843	18	1	334	36.6	6.05	19392	716.18	19	12	0	5.76788e+09	5.57855e+09	5.72317e+09	6.48979e+09	6.57725e+09	6.58419e+09	6.97372e+09	7.53508e+09	7.29942e+09
High	High	Master Protein	P54920	Alpha-soluble NSF attachment protein OS=Homo sapiens GN=NAPA PE=1 SV=3	0	0	83	22	563	19	1	295	33.2	5.36	12406	714.92	22	16	3	7.98747e+08	7.42995e+08	7.26639e+08	1.00425e+09	1070393968	1.01181e+09	1.14917e+09	1.16191e+09	1.14613e+09
High	High	Master Protein	P28074	Proteasome subunit beta type-5 OS=Homo sapiens GN=PSMB5 PE=1 SV=3	0	0	74	19	537	19	1	263	28.5	6.92	12870	711.89	19	15	0	9.8611e+08	9.08617e+08	9.94218e+08	1.22233e+09	1.29673e+09	1.30155e+09	1.10039e+09	1.26853e+09	1.22329e+09	Acetyl [N-Term]
High	High	Master Protein	O60701	UDP-glucose 6-dehydrogenase OS=Homo sapiens GN=UGDH PE=1 SV=1	0	0	78	38	591	38	1	494	55	7.12	12923	709.15	37	24	0	1159100942	1.24983e+09	1.15037e+09	1.61889e+09	1.78565e+09	1.87869e+09	1.82365e+09	1.90375e+09	1.92057e+09
High	High	Master Protein	P20042	Eukaryotic translation initiation factor 2 subunit 2 OS=Homo sapiens GN=EIF2S2 PE=1 SV=2	0	0	68	34	851	34	1	333	38.4	5.8	20592	708.7	34	19	0	1.58618e+09	1.55279e+09	1.64603e+09	1.9312e+09	1.92072e+09	1.89437e+09	1.93574e+09	2026166763	2.16409e+09
High	High	Master Protein	Q9NR09	Baculoviral IAP repeat-containing protein 6 OS=Homo sapiens GN=BIRC6 PE=1 SV=2	0	0	32	106	743	106	1	4857	529.9	6.05	17386	707.04	104	46	0	2.68631e+08	2.51633e+08	2.64216e+08	3.18035e+08	3.33328e+08	3.35717e+08	3.63405e+08	3.65106e+08	3.71038e+08
High	High	Master Protein	P63104	14-3-3 protein zeta/delta OS=Homo sapiens GN=YWHAZ PE=1 SV=1	0	0	71	21	986	15	1	245	27.7	4.79	22759	706.56	21	11	4	6.2195e+09	5.78161e+09	6.08431e+09	7.16928e+09	7.53931e+09	7.3413e+09	8.43203e+09	8.16111e+09	7.63158e+09
High	High	Master Protein	Q02218	2-oxoglutarate dehydrogenase, mitochondrial OS=Homo sapiens GN=OGDH PE=1 SV=3	0	0	63	56	737	56	1	1023	115.9	6.86	16258	706.54	53	31	0	7.58864e+08	7.23808e+08	7.43958e+08	9.21705e+08	9.57704e+08	9.61476e+08	1.09083e+09	1.09724e+09	1.15901e+09
High	High	Master Protein	Q96KR1	Zinc finger RNA-binding protein OS=Homo sapiens GN=ZFR PE=1 SV=2	0	0	55	51	587	50	1	1074	116.9	9.04	13923	706.33	51	28	0	3.59979e+08	3.57395e+08	3.67749e+08	5.22348e+08	5.48513e+08	5.16027e+08	5.59374e+08	5.62408e+08	5.59973e+08	Acetyl [N-Term]
High	High	None	P69849	Nodal modulator 3 OS=Homo sapiens GN=NOMO3 PE=3 SV=2	0	0	51	45	609	1	1	1222	134	5.67	12810	705.55	42	30	0	5.03335e+08	5.05833e+08	5.06242e+08	6.26253e+08	6.22044e+08	6.37845e+08	8.3986e+08	8.44307e+08	8.58791e+08
High	High	Master Protein	Q15643	Thyroid receptor-interacting protein 11 OS=Homo sapiens GN=TRIP11 PE=1 SV=3	0	0	61	110	775	110	1	1979	227.4	5.26	16785	704.14	107	45	0	3.79782e+08	3.73835e+08	3.81346e+08	4.80661e+08	4.84344e+08	4.84071e+08	7.63932e+08	8.90293e+08	7.9988e+08
High	High	Master Protein	P78540	Arginase-2, mitochondrial OS=Homo sapiens GN=ARG2 PE=1 SV=1	0	0	75	18	473	18	1	354	38.6	6.47	11798	703.29	18	9	0	5.76435e+08	5.97563e+08	5.95285e+08	6.4678e+08	6.77048e+08	6.94693e+08	8.53509e+08	8.68586e+08	8.42998e+08
High	High	Master Protein	Q15155	Nodal modulator 1 OS=Homo sapiens GN=NOMO1 PE=1 SV=5	0	0	51	46	611	2	1	1222	134.2	5.81	13033	702.92	42	31	0	5.74939e+06	6.02164e+06	6.36326e+06	1.01947e+07	8.3194e+06	8636531	1.44021e+07	1.2596e+07	1.4725e+07
High	High	Master Protein	P50993	Sodium/potassium-transporting ATPase subunit alpha-2 OS=Homo sapiens GN=ATP1A2 PE=1 SV=1	0	0	18	18	508	1	1	1020	112.2	5.66	12683	701.2	18	8	0
High	High	Master Protein	P27694	Replication protein A 70 kDa DNA-binding subunit OS=Homo sapiens GN=RPA1 PE=1 SV=2	0	0	63	39	708	39	1	616	68.1	7.21	17104	700.74	39	22	0	1.30932e+09	1.33829e+09	1.3365e+09	1.61487e+09	1.59876e+09	1.71774e+09	1.61091e+09	1.66356e+09	1.71279e+09	Acetyl [N-Term]
High	High	Master Protein	P22830	Ferrochelatase, mitochondrial OS=Homo sapiens GN=FECH PE=1 SV=2	0	0	60	22	475	22	1	423	47.8	8.73	10963	698.95	22	12	0	9.81117e+08	8.90589e+08	9.02097e+08	1.11643e+09	1.1553e+09	1.1401e+09	1.3499e+09	1.35292e+09	1.41184e+09
High	High	Master Protein	P83916	Chromobox protein homolog 1 OS=Homo sapiens GN=CBX1 PE=1 SV=1	0	0	72	15	476	14	1	185	21.4	4.93	10689	696.81	15	11	2	4.66004e+08	5.19003e+08	5.01373e+08	5.95014e+08	6.77423e+08	6.56795e+08	7.27781e+08	6.94443e+08	7.75413e+08
High	High	Master Protein	P55036	26S proteasome non-ATPase regulatory subunit 4 OS=Homo sapiens GN=PSMD4 PE=1 SV=1	0	0	50	18	459	13	1	377	40.7	4.79	10488	696.28	18	10	4	1.01294e+09	9.77602e+08	1.02366e+09	1.20687e+09	1.31376e+09	1.31575e+09	1.23351e+09	1.31919e+09	1.37342e+09
High	High	Master Protein	P32119	Peroxiredoxin-2 OS=Homo sapiens GN=PRDX2 PE=1 SV=5	0	0	67	18	663	17	1	198	21.9	5.97	13872	695.59	18	10	0	6.37288e+09	5.46781e+09	5.44609e+09	5.62318e+09	6.13064e+09	5.663e+09	6.94037e+09	6.74094e+09	6.70166e+09
High	High	Master Protein	P34931	Heat shock 70 kDa protein 1-like OS=Homo sapiens GN=HSPA1L PE=1 SV=2	0	0	29	15	665	2	1	641	70.3	6.02	17003	695.54	15	8	0	8461157	8904127	7.5836e+06	1.14981e+07	9.9091e+06	12029455	1.12048e+07	11780264	1.21722e+07
High	High	Master Protein	E9PAV3	Nascent polypeptide-associated complex subunit alpha, muscle-specific form OS=Homo sapiens GN=NACA PE=1 SV=1	0	0	12	12	435	10	1	2078	205.3	9.58	10342	695.37	7	10	2	1.735e+09	1.70407e+09	1.65554e+09	2.23291e+09	2.39024e+09	2.40868e+09	2.62567e+09	2.46882e+09	2.50591e+09
High	High	Master Protein	Q12904	Aminoacyl tRNA synthase complex-interacting multifunctional protein 1 OS=Homo sapiens GN=AIMP1 PE=1 SV=2	0	0	77	23	513	23	1	312	34.3	8.43	11887	691.25	23	15	0	1.00416e+09	9.7497e+08	1.01033e+09	1.21706e+09	1.36002e+09	1.31082e+09	1.34699e+09	1.43942e+09	1.40364e+09	Acetyl [N-Term]
High	High	Master Protein	P48444	Coatomer subunit delta OS=Homo sapiens GN=ARCN1 PE=1 SV=1	0	0	58	33	684	33	1	511	57.2	6.21	16693	691.11	32	15	0	1.3634e+09	1262224184	1.27794e+09	1.65549e+09	1.72109e+09	1.72982e+09	1.68087e+09	1.68339e+09	1.77966e+09	Acetyl [N-Term]
High	High	Master Protein	P00491	Purine nucleoside phosphorylase OS=Homo sapiens GN=PNP PE=1 SV=2	0	0	81	20	547	20	1	289	32.1	6.95	12443	690.26	19	12	0	1.52329e+09	1.53952e+09	1.65192e+09	1.71096e+09	1.78911e+09	1.82593e+09	1.69391e+09	1.73488e+09	1.78485e+09	Acetyl [N-Term]
High	High	Master Protein	O00231	26S proteasome non-ATPase regulatory subunit 11 OS=Homo sapiens GN=PSMD11 PE=1 SV=3	0	0	73	29	642	29	1	422	47.4	6.48	14356	689.91	27	16	0	1.841e+09	1.81845e+09	1.89985e+09	2.16725e+09	2.31256e+09	2.3402e+09	2.4232e+09	2.38142e+09	2.44844e+09	Acetyl [N-Term]
High	High	Master Protein	P12532	Creatine kinase U-type, mitochondrial OS=Homo sapiens GN=CKMT1A PE=1 SV=1	0	0	50	20	549	20	1	417	47	8.34	12125	689.53	20	10	0	2.06859e+09	2.05985e+09	2.20252e+09	2.50839e+09	2.74958e+09	2.66529e+09	2.91164e+09	3.04506e+09	3.1638e+09
High	High	Master Protein	P46060	Ran GTPase-activating protein 1 OS=Homo sapiens GN=RANGAP1 PE=1 SV=1	0	0	67	37	680	37	1	587	63.5	4.68	17865	689.41	37	26	0	1.12778e+09	1.12758e+09	1.16242e+09	1.25984e+09	1.38609e+09	1.33962e+09	1.42041e+09	1.39338e+09	1.47404e+09
High	High	Master Protein	P51116	Fragile X mental retardation syndrome-related protein 2 OS=Homo sapiens GN=FXR2 PE=1 SV=2	0	0	61	40	610	36	1	673	74.2	6.23	15984	689.15	39	25	5	6.06936e+08	5.76466e+08	5.67699e+08	7.337e+08	6.76062e+08	7.25732e+08	8.03249e+08	7.85333e+08	8.14839e+08
High	High	Master Protein	Q96QK1	Vacuolar protein sorting-associated protein 35 OS=Homo sapiens GN=VPS35 PE=1 SV=2	0	0	49	40	714	39	1	796	91.6	5.49	17178	688.15	39	22	0	1.88461e+09	1.83178e+09	1.84749e+09	2.36817e+09	2.39881e+09	2.41755e+09	2.59015e+09	2.44191e+09	2.83643e+09
High	High	Master Protein	Q14247	Src substrate cortactin OS=Homo sapiens GN=CTTN PE=1 SV=2	0	0	59	36	651	36	1	550	61.5	5.4	16359	687.79	36	20	0	1.43309e+09	1.3918e+09	1.45095e+09	1.93017e+09	1.99647e+09	1.97672e+09	1.64369e+09	1.72445e+09	1.65429e+09
High	High	Master Protein	P40763	Signal transducer and activator of transcription 3 OS=Homo sapiens GN=STAT3 PE=1 SV=2	0	0	58	35	530	35	1	770	88	6.3	12944	685.9	35	20	0	5.09711e+08	5.12882e+08	5.37858e+08	7.9512e+08	8.31088e+08	7.913e+08	9.913e+08	1.00819e+09	1.00596e+09	Acetyl [N-Term]
High	High	Master Protein	Q93009	Ubiquitin carboxyl-terminal hydrolase 7 OS=Homo sapiens GN=USP7 PE=1 SV=2	0	0	65	62	723	62	1	1102	128.2	5.55	15215	685.71	61	30	0	9.95981e+08	9.80763e+08	1.01964e+09	1.27101e+09	1.31706e+09	1.34325e+09	1.32304e+09	1.38865e+09	1.40137e+09	Acetyl [N-Term]
High	High	Master Protein	Q7KZ85	Transcription elongation factor SPT6 OS=Homo sapiens GN=SUPT6H PE=1 SV=2	0	0	55	74	597	74	1	1726	198.9	4.91	13218	685.41	73	39	0	3.31047e+08	3.21913e+08	3.35217e+08	3.62477e+08	3.83895e+08	3.96216e+08	4.1283e+08	3.91283e+08	4.01862e+08
High	High	Master Protein	O00232	26S proteasome non-ATPase regulatory subunit 12 OS=Homo sapiens GN=PSMD12 PE=1 SV=3	0	0	49	21	608	21	1	456	52.9	7.65	14950	684.75	21	13	0	9.80667e+08	9.42693e+08	9.84364e+08	1.23606e+09	1.34353e+09	1.32269e+09	1.4374e+09	1.43444e+09	1.4321e+09
High	High	Master Protein	P55327	Tumor protein D52 OS=Homo sapiens GN=TPD52 PE=1 SV=2	0	0	56	10	472	10	1	224	24.3	4.83	11962	680.7	10	9	0	1.09063e+09	1.10117e+09	1.26192e+09	1.46046e+09	1.60242e+09	1.51032e+09	1.68348e+09	1.67147e+09	1.70576e+09
High	High	Master Protein	Q9Y617	Phosphoserine aminotransferase OS=Homo sapiens GN=PSAT1 PE=1 SV=2	0	0	71	22	720	22	1	370	40.4	7.66	16972	680.31	21	16	0	2.41459e+09	2.28955e+09	2.37089e+09	3543958690	3.81248e+09	3.71519e+09	4.27089e+09	4.59553e+09	4.49449e+09	Acetyl [N-Term]
High	High	Master Protein	P25398	40S ribosomal protein S12 OS=Homo sapiens GN=RPS12 PE=1 SV=3	0	0	77	10	691	10	1	132	14.5	7.21	17442	678.4	10	5	0	2.72118e+09	2.5594e+09	2.58626e+09	3.49293e+09	3.90655e+09	3.54822e+09	3.64301e+09	3.90781e+09	3.77031e+09	Acetyl [N-Term]
High	High	Master Protein	P31689	DnaJ homolog subfamily A member 1 OS=Homo sapiens GN=DNAJA1 PE=1 SV=2	0	0	57	22	444	22	1	397	44.8	7.08	10128	677.96	22	15	0	6.44814e+08	6.54014e+08	6.87096e+08	8.33019e+08	8.34217e+08	8.76738e+08	9.67844e+08	9.58948e+08	9.25147e+08
High	High	Master Protein	Q9BTC0	Death-inducer obliterator 1 OS=Homo sapiens GN=DIDO1 PE=1 SV=5	0	0	50	80	600	79	1	2240	243.7	7.88	12592	676.07	79	38	1	3.40164e+08	3.43963e+08	3.31859e+08	3.84902e+08	3.95101e+08	3.70555e+08	4.48814e+08	4.65867e+08	4.76175e+08	Acetyl [N-Term]
High	High	Master Protein	Q14240	Eukaryotic initiation factor 4A-II OS=Homo sapiens GN=EIF4A2 PE=1 SV=2	0	0	65	27	688	10	1	407	46.4	5.48	16412	675.6	27	12	0	2.04659e+08	1.7868e+08	1.77461e+08	2.30807e+08	2.8788e+08	2.99307e+08	2.7262e+08	3.1213e+08	3.21773e+08	Acetyl [N-Term]
High	High	Master Protein	P07737	Profilin-1 OS=Homo sapiens GN=PFN1 PE=1 SV=2	0	0	94	13	956	13	1	140	15	8.27	25740	674.73	13	9	0	9.42179e+09	8.70057e+09	9.39774e+09	1.03063e+10	1.05245e+10	1.02887e+10	1.11234e+10	1.14927e+10	1.13013e+10	Acetyl [N-Term]
High	High	Master Protein	P30041	Peroxiredoxin-6 OS=Homo sapiens GN=PRDX6 PE=1 SV=3	0	0	78	23	804	23	1	224	25	6.38	19639	673.14	21	12	0	5.57238e+09	6.4014e+09	6.38698e+09	7.72572e+09	7.51751e+09	7.47262e+09	7.68522e+09	7.7774e+09	7.45591e+09
High	High	Master Protein	P13796	Plastin-2 OS=Homo sapiens GN=LCP1 PE=1 SV=6	0	0	76	43	732	34	1	627	70.2	5.43	16957	672.9	43	25	9	1.63538e+09	1.61124e+09	1.72374e+09	1.96294e+09	2.16909e+09	2.14048e+09	2.17698e+09	2.1636e+09	2.16828e+09
High	High	Master Protein	Q9H4A4	Aminopeptidase B OS=Homo sapiens GN=RNPEP PE=1 SV=2	0	0	67	36	620	36	1	650	72.5	5.74	14151	672.83	34	21	0	1.34707e+09	1.31553e+09	1.35658e+09	1.58729e+09	1.74006e+09	1.63455e+09	1.65699e+09	1.79408e+09	1.7358e+09	Acetyl [N-Term]
High	High	Master Protein	P00338	L-lactate dehydrogenase A chain OS=Homo sapiens GN=LDHA PE=1 SV=2	0	0	64	22	918	20	1	332	36.7	8.27	22828	672.82	22	11	2	1.28309e+10	1.22712e+10	1.38117e+10	1.68449e+10	1.81865e+10	1.73744e+10	1.37158e+10	1.48288e+10	1.47456e+10
High	High	Master Protein	Q92499	ATP-dependent RNA helicase DDX1 OS=Homo sapiens GN=DDX1 PE=1 SV=2	0	0	64	47	697	47	1	740	82.4	7.23	15210	669.79	47	24	0	1.47364e+09	1.47155e+09	1.45427e+09	1.82764e+09	1.89596e+09	1.85422e+09	2.01385e+09	2.10806e+09	2.09863e+09
High	High	Master Protein	O43592	Exportin-T OS=Homo sapiens GN=XPOT PE=1 SV=2	0	0	50	35	554	35	1	962	109.9	5.39	12668	668.11	35	22	0	7.00886e+08	6.77975e+08	6.92732e+08	8.35047e+08	8.59661e+08	8.61765e+08	9.25284e+08	9.32191e+08	9.26899e+08	Acetyl [N-Term]
High	High	Master Protein	P63151	Serine/threonine-protein phosphatase 2A 55 kDa regulatory subunit B alpha isoform OS=Homo sapiens GN=PPP2R2A PE=1 SV=1	0	0	68	26	487	17	1	447	51.7	6.2	9539	667.47	26	13	9	1.13965e+09	1.03379e+09	1.1931e+09	1.43572e+09	1.42076e+09	1.43395e+09	1.60131e+09	1.61713e+09	1.59608e+09	Acetyl [N-Term]
High	High	Master Protein	Q13177	Serine/threonine-protein kinase PAK 2 OS=Homo sapiens GN=PAK2 PE=1 SV=3	0	0	69	31	569	24	1	524	58	5.96	11683	666.48	31	15	9	7.39878e+08	7.03957e+08	7.65113e+08	8.75827e+08	9.46099e+08	9.25367e+08	1.10613e+09	1.11557e+09	1.13406e+09	Acetyl [N-Term]
High	High	Master Protein	P24928	DNA-directed RNA polymerase II subunit RPB1 OS=Homo sapiens GN=POLR2A PE=1 SV=2	0	0	48	80	699	80	1	1970	217	7.37	15432	666.26	78	37	0	4.09768e+08	3.92677e+08	4.03057e+08	5.10188e+08	5.24677e+08	5.29673e+08	5.58233e+08	5.57228e+08	5.43255e+08	Acetyl [N-Term]
High	High	Master Protein	P09960	Leukotriene A-4 hydrolase OS=Homo sapiens GN=LTA4H PE=1 SV=2	0	0	60	31	521	31	1	611	69.2	6.18	13232	666.14	31	12	0	5.55933e+08	5.67832e+08	5.60245e+08	6.77425e+08	7.00187e+08	6.65302e+08	7.53589e+08	7.59984e+08	7.23143e+08
High	High	Master Protein	O75165	DnaJ homolog subfamily C member 13 OS=Homo sapiens GN=DNAJC13 PE=1 SV=5	0	0	39	74	646	74	1	2243	254.3	6.74	14733	665.71	73	28	0	2.70826e+08	2.63938e+08	2.76207e+08	3.32882e+08	3.56131e+08	3.6352e+08	3.57839e+08	3.49211e+08	3.72219e+08
High	High	Master Protein	P32322	Pyrroline-5-carboxylate reductase 1, mitochondrial OS=Homo sapiens GN=PYCR1 PE=1 SV=2	0	0	69	19	529	18	1	319	33.3	7.61	14687	665.59	19	17	1	6.32256e+08	6.76059e+08	6.35851e+08	7.49978e+08	7.5979e+08	7.8357e+08	1.00255e+09	9.49577e+08	9.25567e+08	Acetyl [N-Term]
High	High	Master Protein	Q08J23	tRNA (cytosine(34)-C(5))-methyltransferase OS=Homo sapiens GN=NSUN2 PE=1 SV=2	0	0	78	54	701	54	1	767	86.4	6.77	16556	663.79	52	29	0	9.50776e+08	9.29551e+08	9.29705e+08	1.19055e+09	1.23153e+09	1.1873e+09	1.40546e+09	1.39876e+09	1.41531e+09
High	High	Master Protein	P20810	Calpastatin OS=Homo sapiens GN=CAST PE=1 SV=4	0	0	59	38	526	38	1	708	76.5	5.07	12329	663.07	36	22	0	3.56425e+08	3.62007e+08	3.64222e+08	4.61337e+08	4.78916e+08	4.68538e+08	4.79359e+08	5.09769e+08	4.99049e+08
High	High	Master Protein	P04264	Keratin, type II cytoskeletal 1 OS=Homo sapiens GN=KRT1 PE=1 SV=6	0	0	53	40	631	33	1	644	66	8.12	16597	661.26	39	21	2	7.28725e+08	6.85089e+08	7.33938e+08	1.37065e+09	1.45554e+09	1.47787e+09	1.2092e+09	1.24299e+09	1.25574e+09
High	High	Master Protein	Q15139	Serine/threonine-protein kinase D1 OS=Homo sapiens GN=PRKD1 PE=1 SV=2	0	0	46	33	520	29	1	912	101.6	6.62	10567	661.03	33	17	5	5.94952e+08	5.64897e+08	5.78885e+08	8.06404e+08	8.14496e+08	8.01721e+08	8.67461e+08	8.11566e+08	8.82086e+08
High	High	Master Protein	O60610	Protein diaphanous homolog 1 OS=Homo sapiens GN=DIAPH1 PE=1 SV=2	0	0	46	60	676	59	1	1272	141.3	5.41	14351	660.77	57	25	1	8.15359e+08	7.65731e+08	8.0103e+08	8.15149e+08	8.72408e+08	8.59628e+08	9.40431e+08	9.46829e+08	9.28099e+08	Acetyl [N-Term]
High	High	Master Protein	P07910	Heterogeneous nuclear ribonucleoproteins C1/C2 OS=Homo sapiens GN=HNRNPC PE=1 SV=4	0	0	70	25	904	24	1	306	33.7	5.08	24491	660.17	25	12	1	7.36367e+09	7.29301e+09	7.38798e+09	9.02303e+09	9.38652e+09	9.16041e+09	9.77843e+09	9.9612e+09	9.81185e+09
High	High	Master Protein	P0DN79	Cystathionine beta-synthase-like protein OS=Homo sapiens GN=CBSL PE=1 SV=1	0	0	57	25	506	25	1	551	60.5	6.65	12439	659.64	25	10	0	8.09902e+08	7.28701e+08	8.2269e+08	8.82537e+08	1.00832e+09	9.14017e+08	1.13697e+09	1.06382e+09	1.0766e+09
High	High	Master Protein	P49589	Cysteine--tRNA ligase, cytoplasmic OS=Homo sapiens GN=CARS PE=1 SV=3	0	0	63	44	715	44	1	748	85.4	6.76	18161	657.48	44	24	0	6.67225e+08	6.43888e+08	6.98492e+08	1.00543e+09	1.03937e+09	1.00696e+09	1.16506e+09	1.2424e+09	1.18191e+09	Acetyl [N-Term]
High	High	Master Protein	Q9Y5B9	FACT complex subunit SPT16 OS=Homo sapiens GN=SUPT16H PE=1 SV=1	0	0	47	48	667	47	1	1047	119.8	5.66	13728	657.1	46	27	1	9.00378e+08	8.65428e+08	9.25135e+08	9.90179e+08	1.03279e+09	1.04515e+09	1.03307e+09	1.01769e+09	1.01038e+09
High	High	None	Q13765	Nascent polypeptide-associated complex subunit alpha OS=Homo sapiens GN=NACA PE=1 SV=1	0	0	49	7	425	5	1	215	23.4	4.56	10342	656.45	7	5	0	1.7345e+09	1.70371e+09	1.65498e+09	2.23082e+09	2.38929e+09	2.40769e+09	2.62453e+09	2.46529e+09	2.50447e+09
High	High	Master Protein	Q9BQS8	FYVE and coiled-coil domain-containing protein 1 OS=Homo sapiens GN=FYCO1 PE=1 SV=3	0	0	52	65	569	65	1	1478	166.9	4.92	13559	654.82	64	37	0	2.08703e+08	2.46799e+08	2.45735e+08	3.02658e+08	3.51834e+08	2.92639e+08	3.62594e+08	3.98705e+08	4.22467e+08	Acetyl [N-Term]
High	High	Master Protein	O15372	Eukaryotic translation initiation factor 3 subunit H OS=Homo sapiens GN=EIF3H PE=1 SV=1	0	0	64	20	526	20	1	352	39.9	6.54	14146	654.74	18	12	0	7.75948e+08	7.52831e+08	7.43921e+08	9.46447e+08	1.00118e+09	1.00851e+09	1.04579e+09	1.13774e+09	1.09628e+09
High	High	Master Protein	P30154	Serine/threonine-protein phosphatase 2A 65 kDa regulatory subunit A beta isoform OS=Homo sapiens GN=PPP2R1B PE=1 SV=3	0	0	46	24	527	16	1	601	66.2	4.94	14872	654.35	24	15	0	1.42228e+08	1.43565e+08	1.4732e+08	1.71655e+08	1.77574e+08	1.6288e+08	1.78026e+08	1.89531e+08	1.681e+08
High	High	Master Protein	O43390	Heterogeneous nuclear ribonucleoprotein R OS=Homo sapiens GN=HNRNPR PE=1 SV=1	0	0	56	37	773	25	1	633	70.9	8.13	16854	654.07	37	20	13	2.45048e+09	2.19684e+09	2.27904e+09	2.74351e+09	3.01331e+09	2.81457e+09	2.70084e+09	2.74137e+09	2.59002e+09	Acetyl [N-Term]
High	High	Master Protein	P07741	Adenine phosphoribosyltransferase OS=Homo sapiens GN=APRT PE=1 SV=2	0	0	66	9	389	9	1	180	19.6	6.02	9090	653.71	9	4	0	9.81927e+08	9.84687e+08	1.04024e+09	1.24058e+09	1.23882e+09	1.24946e+09	1.38676e+09	1.32772e+09	1.33367e+09	Acetyl [N-Term]
High	High	Master Protein	P52292	Importin subunit alpha-1 OS=Homo sapiens GN=KPNA2 PE=1 SV=1	0	0	49	19	502	19	1	529	57.8	5.4	13516	653.65	19	9	0	6.86275e+08	6.57861e+08	7.27649e+08	7.79199e+08	7.99733e+08	8.6813e+08	8.85104e+08	9.01424e+08	9.30725e+08	Acetyl [N-Term]
High	High	Master Protein	O15031	Plexin-B2 OS=Homo sapiens GN=PLXNB2 PE=1 SV=3	0	0	40	57	535	57	1	1838	205	6.24	12056	653.65	57	29	0	2.27215e+08	2.28275e+08	2.34958e+08	2.60854e+08	2.74239e+08	2.82977e+08	3.53084e+08	3.57411e+08	3.57541e+08
High	High	Master Protein	O60264	SWI/SNF-related matrix-associated actin-dependent regulator of chromatin subfamily A member 5 OS=Homo sapiens GN=SMARCA5 PE=1 SV=1	0	0	56	60	736	48	1	1052	121.8	8.09	17440	653.42	59	22	12	7.86072e+08	7.48934e+08	7.9119e+08	8.06989e+08	8.21346e+08	8.61051e+08	1.04733e+09	1.10817e+09	1.08416e+09	Acetyl [N-Term]
High	High	Master Protein	P67775	Serine/threonine-protein phosphatase 2A catalytic subunit alpha isoform OS=Homo sapiens GN=PPP2CA PE=1 SV=1	0	0	64	16	500	1	1	309	35.6	5.54	11093	653.36	16	11	0	97712366	1.01351e+08	1.02793e+08	1.34033e+08	164003249	1.3313e+08	1.55038e+08	1.85106e+08	152733587
High	High	Master Protein	P28070	Proteasome subunit beta type-4 OS=Homo sapiens GN=PSMB4 PE=1 SV=4	0	0	64	11	386	11	1	264	29.2	5.97	8052	652.64	11	8	0	5.71379e+08	5.50476e+08	5.21492e+08	7.97086e+08	7.29225e+08	7.85383e+08	6.71621e+08	6.48061e+08	6.44675e+08	Acetyl [N-Term]
High	High	Master Protein	O95347	Structural maintenance of chromosomes protein 2 OS=Homo sapiens GN=SMC2 PE=1 SV=2	0	0	56	66	689	66	1	1197	135.6	8.43	15205	652.18	66	30	0	9.1023e+08	8.58717e+08	8.71464e+08	9.21685e+08	9.46972e+08	9.50415e+08	8.89272e+08	9.48265e+08	8.66528e+08
High	High	Master Protein	Q12788	Transducin beta-like protein 3 OS=Homo sapiens GN=TBL3 PE=1 SV=2	0	0	58	36	552	36	1	808	89	6.9	14683	651.99	35	23	0	3.63445e+08	3.72512e+08	3.65728e+08	4.27258e+08	4.60651e+08	4.46292e+08	5.05151e+08	4.95676e+08	4.82291e+08	Acetyl [N-Term]
High	High	Master Protein	P51858	Hepatoma-derived growth factor OS=Homo sapiens GN=HDGF PE=1 SV=1	0	0	83	25	766	24	1	240	26.8	4.73	18348	650.69	25	14	0	1.94143e+09	2.02084e+09	2.05926e+09	2.38269e+09	2.33139e+09	2.53476e+09	2.35426e+09	2.41058e+09	2.47798e+09
High	High	Master Protein	P29966	Myristoylated alanine-rich C-kinase substrate OS=Homo sapiens GN=MARCKS PE=1 SV=4	0	0	62	15	448	14	1	332	31.5	4.45	13720	650.58	14	12	1	2.9067e+08	2.72847e+08	2.79178e+08	3.79313e+08	3.42035e+08	3.56694e+08	4.75826e+08	5.831e+08	5.51429e+08	Acetyl [N-Term]
High	High	Master Protein	P62241	40S ribosomal protein S8 OS=Homo sapiens GN=RPS8 PE=1 SV=2	0	0	60	15	515	15	1	208	24.2	10.32	11091	648.19	15	8	0	3.90595e+09	3.75602e+09	3.97269e+09	4.96729e+09	5.00471e+09	5.30731e+09	5.26808e+09	5.15105e+09	5.40928e+09
High	High	Master Protein	P84077	ADP-ribosylation factor 1 OS=Homo sapiens GN=ARF1 PE=1 SV=2	0	0	71	14	617	8	1	181	20.7	6.8	14825	647.92	12	9	7	2.43573e+09	2.25576e+09	2.42207e+09	2757253367	2.83721e+09	2.7701e+09	3.05568e+09	3.09148e+09	3.13501e+09
High	High	Master Protein	P14314	Glucosidase 2 subunit beta OS=Homo sapiens GN=PRKCSH PE=1 SV=2	0	0	57	29	646	29	1	528	59.4	4.41	13434	647.86	29	16	0	2.14021e+09	2.36558e+09	2.28423e+09	2.6152e+09	2.71248e+09	2.74244e+09	3.15557e+09	3.17306e+09	3.21634e+09
High	High	Master Protein	Q06830	Peroxiredoxin-1 OS=Homo sapiens GN=PRDX1 PE=1 SV=1	0	0	74	19	831	15	1	199	22.1	8.13	17585	647.86	19	9	4	1.80147e+10	1.66143e+10	1.74279e+10	2.09891e+10	2.25067e+10	2.03724e+10	2.3074e+10	2.3346e+10	2.39542e+10
High	High	Master Protein	Q02750	Dual specificity mitogen-activated protein kinase kinase 1 OS=Homo sapiens GN=MAP2K1 PE=1 SV=2	0	0	55	20	449	13	1	393	43.4	6.62	9422	647.75	20	9	0	2.64829e+08	2.14471e+08	2.41096e+08	3.73618e+08	3.66344e+08	3.63833e+08	3.93768e+08	3.97912e+08	4.18466e+08
High	High	Master Protein	Q13310	Polyadenylate-binding protein 4 OS=Homo sapiens GN=PABPC4 PE=1 SV=1	0	0	70	35	793	22	1	644	70.7	9.26	19024	646.85	34	15	0	7.57922e+08	7.08961e+08	7.38138e+08	9.65664e+08	9.20801e+08	9.54088e+08	1.14739e+09	1.11003e+09	1.09244e+09
High	High	Master Protein	Q9Y3F4	Serine-threonine kinase receptor-associated protein OS=Homo sapiens GN=STRAP PE=1 SV=1	0	0	79	24	616	24	1	350	38.4	5.12	14139	646.54	24	16	0	1.45483e+09	1.36662e+09	1.37175e+09	1.65522e+09	1.73452e+09	1.74069e+09	2065400177	2.17076e+09	2.03757e+09
High	High	Master Protein	Q9H1B7	Interferon regulatory factor 2-binding protein-like OS=Homo sapiens GN=IRF2BPL PE=1 SV=1	0	0	61	38	497	35	1	796	82.6	8.24	11847	646.27	38	19	3	3.20495e+08	3.14381e+08	3.09402e+08	3.46409e+08	3.60068e+08	3.69913e+08	3.69132e+08	3.81193e+08	3.76599e+08	Acetyl [N-Term]
High	High	Master Protein	Q12873	Chromodomain-helicase-DNA-binding protein 3 OS=Homo sapiens GN=CHD3 PE=1 SV=3	0	0	37	66	655	40	1	2000	226.5	7.3	13883	645.62	66	32	7	1.27307e+08	1.31079e+08	1.24429e+08	1.56818e+08	1.62739e+08	1.71483e+08	1.81794e+08	1.80811e+08	1.80827e+08
High	High	Master Protein	P62714	Serine/threonine-protein phosphatase 2A catalytic subunit beta isoform OS=Homo sapiens GN=PPP2CB PE=1 SV=1	0	0	66	17	505	2	1	309	35.6	5.43	11296	645.51	17	11	20	1.26629e+09	1.28976e+09	1.35032e+09	1.53971e+09	1.54928e+09	1.55049e+09	1.74738e+09	1.68057e+09	1.67717e+09
High	High	Master Protein	Q96PK6	RNA-binding protein 14 OS=Homo sapiens GN=RBM14 PE=1 SV=2	0	0	48	32	567	32	1	669	69.4	9.67	14657	644.88	32	9	0	1.00412e+09	1.01494e+09	1.21025e+09	1.36606e+09	1.49168e+09	1.43702e+09	1.61615e+09	1.63876e+09	1.73127e+09
High	High	Master Protein	Q99459	Cell division cycle 5-like protein OS=Homo sapiens GN=CDC5L PE=1 SV=2	0	0	72	52	579	52	1	802	92.2	8.18	12200	644.68	52	24	0	5.49498e+08	4.91416e+08	5.3426e+08	6.08559e+08	6.22517e+08	6.34788e+08	6.85209e+08	7.04551e+08	6.75073e+08
High	High	None	P61204	ADP-ribosylation factor 3 OS=Homo sapiens GN=ARF3 PE=1 SV=2	0	0	65	13	608	7	1	181	20.6	7.43	14598	644.66	11	8	0	2.43442e+09	2.25483e+09	2.42111e+09	2.75664e+09	2.83631e+09	2.76931e+09	3.0548e+09	3.09077e+09	3.13431e+09
High	High	Master Protein	Q9H0U4	Ras-related protein Rab-1B OS=Homo sapiens GN=RAB1B PE=1 SV=1	0	0	77	18	569	10	1	201	22.2	5.73	13193	644.5	17	9	8	2.24262e+09	2.30097e+09	2.40247e+09	2.39496e+09	2.57707e+09	2.65502e+09	3.12068e+09	3.04166e+09	3.09225e+09	Acetyl [N-Term]
High	High	Master Protein	O43143	Pre-mRNA-splicing factor ATP-dependent RNA helicase DHX15 OS=Homo sapiens GN=DHX15 PE=1 SV=2	0	0	58	48	868	47	1	795	90.9	7.46	19588	644.44	47	23	2	1.58618e+09	1.59989e+09	1.68464e+09	1.94242e+09	2.21698e+09	2.07187e+09	2.13457e+09	2.00496e+09	2.06962e+09
High	High	Master Protein	Q4V328	GRIP1-associated protein 1 OS=Homo sapiens GN=GRIPAP1 PE=1 SV=1	0	0	64	51	536	51	1	841	95.9	5.11	12583	643.89	50	25	0	2.72652e+08	2.61137e+08	2.66407e+08	3.46153e+08	3.76014e+08	3.8053e+08	4.06253e+08	4.11693e+08	3.94868e+08	Acetyl [N-Term]
High	High	Master Protein	P52209	6-phosphogluconate dehydrogenase, decarboxylating OS=Homo sapiens GN=PGD PE=1 SV=3	0	0	75	31	614	31	1	483	53.1	7.23	12669	643.76	30	17	0	2.26782e+09	2.21901e+09	2.24945e+09	2.73321e+09	2.84618e+09	2.94285e+09	3150927700	3.06832e+09	3.06606e+09
High	High	Master Protein	Q9H2G2	STE20-like serine/threonine-protein kinase OS=Homo sapiens GN=SLK PE=1 SV=1	0	0	53	53	577	50	1	1235	142.6	5.15	14040	641.58	52	28	3	2.73588e+08	2.73883e+08	2.81774e+08	3.13292e+08	3.35026e+08	3.11573e+08	3.53497e+08	3.84375e+08	3.7639e+08
High	High	Master Protein	O94979	Protein transport protein Sec31A OS=Homo sapiens GN=SEC31A PE=1 SV=3	0	0	50	51	605	51	1	1220	132.9	6.89	13706	640.66	51	22	0	1.13132e+09	1.0673e+09	1.09429e+09	1.47271e+09	1.6322e+09	1.5249e+09	1.49512e+09	1.55839e+09	1.64726e+09
High	High	Master Protein	Q9H0D6	5'-3' exoribonuclease 2 OS=Homo sapiens GN=XRN2 PE=1 SV=1	0	0	66	51	553	51	1	950	108.5	7.47	11407	640.66	51	31	0	5.25963e+08	5.19655e+08	5.13276e+08	7.16164e+08	7.19737e+08	7.2367e+08	7.82499e+08	8.15308e+08	8.07698e+08
High	High	Master Protein	Q6XQN6	Nicotinate phosphoribosyltransferase OS=Homo sapiens GN=NAPRT PE=1 SV=2	0	0	69	28	516	28	1	538	57.5	5.68	11654	640.19	28	19	0	628643192	6.29111e+08	5.96423e+08	8.22426e+08	9.13983e+08	8.3896e+08	9.55208e+08	9.4115e+08	9.43091e+08	Acetyl [N-Term]
High	High	Master Protein	Q9UPQ0	LIM and calponin homology domains-containing protein 1 OS=Homo sapiens GN=LIMCH1 PE=1 SV=4	0	0	73	70	727	69	1	1083	121.8	6.47	18423	639.67	68	33	0	6.47317e+08	6.65182e+08	6.53737e+08	1.06058e+09	1.12354e+09	1.11551e+09	1.20144e+09	1.25885e+09	1.24397e+09	Acetyl [N-Term]
High	High	Master Protein	P34949	Mannose-6-phosphate isomerase OS=Homo sapiens GN=MPI PE=1 SV=2	0	0	60	20	466	20	1	423	46.6	5.95	9931	637.17	20	15	0	6.98121e+08	6.77389e+08	6.84766e+08	9.88647e+08	9.97517e+08	1.02166e+09	1.12205e+09	1.09527e+09	1.22038e+09
High	High	Master Protein	P17980	26S protease regulatory subunit 6A OS=Homo sapiens GN=PSMC3 PE=1 SV=3	0	0	71	29	620	29	1	439	49.2	5.24	13892	636.08	29	15	0	1.08133e+09	1.1305e+09	1.20583e+09	1.38706e+09	1.4135e+09	1.44824e+09	1.51234e+09	1.53409e+09	1.52061e+09	Acetyl [N-Term]
High	High	Master Protein	P31930	Cytochrome b-c1 complex subunit 1, mitochondrial OS=Homo sapiens GN=UQCRC1 PE=1 SV=3	0	0	60	22	539	21	1	480	52.6	6.37	12194	635.89	22	17	0	7.14364e+08	7.41826e+08	7.50094e+08	7.66818e+08	7.87142e+08	7.75956e+08	1.03038e+09	1.03614e+09	1.16398e+09
High	High	Master Protein	P13693	Translationally-controlled tumor protein OS=Homo sapiens GN=TPT1 PE=1 SV=1	0	0	67	9	464	9	1	172	19.6	4.93	9406	635.82	9	7	0	1.68442e+09	1.68214e+09	1.63358e+09	2.57009e+09	2.26231e+09	2.52059e+09	2.38991e+09	2.60129e+09	2.71374e+09
High	High	Master Protein	Q01518	Adenylyl cyclase-associated protein 1 OS=Homo sapiens GN=CAP1 PE=1 SV=5	0	0	59	28	656	27	1	475	51.9	8.06	14461	634.7	28	14	1	1.49078e+09	1.48082e+09	1.61006e+09	1.79482e+09	1.90374e+09	2.00309e+09	2.13529e+09	2.09249e+09	2.1169e+09	Acetyl [N-Term]
High	High	Master Protein	Q6Y7W6	GRB10-interacting GYF protein 2 OS=Homo sapiens GN=GIGYF2 PE=1 SV=1	0	0	42	56	558	53	1	1299	150	5.54	11342	634.62	55	24	1	4.42788e+08	4.10955e+08	4.3981e+08	5.78953e+08	5.67509e+08	5.52869e+08	5.53647e+08	5.60276e+08	5.39093e+08	Acetyl [N-Term]
High	High	Master Protein	Q12874	Splicing factor 3A subunit 3 OS=Homo sapiens GN=SF3A3 PE=1 SV=1	0	0	49	24	439	24	1	501	58.8	5.38	8848	633.62	24	11	0	6.64466e+08	6.39379e+08	7.40041e+08	8.57775e+08	8.59636e+08	8.65598e+08	7.69869e+08	7.92547e+08	8.40743e+08	Acetyl [N-Term]
High	High	Master Protein	P78347	General transcription factor II-I OS=Homo sapiens GN=GTF2I PE=1 SV=2	0	0	61	54	666	54	1	998	112.3	6.39	14832	631.5	54	24	0	8.84613e+08	8.62334e+08	9.17154e+08	1.20883e+09	1.237e+09	1.25957e+09	1.22693e+09	1.35301e+09	1.36041e+09	Acetyl [N-Term]
High	High	Master Protein	O95831	Apoptosis-inducing factor 1, mitochondrial OS=Homo sapiens GN=AIFM1 PE=1 SV=1	0	0	51	25	534	25	1	613	66.9	8.95	12048	630.75	25	14	0	8.92483e+08	8.71275e+08	8.79038e+08	9.74788e+08	9.8542e+08	1.0419e+09	1.22124e+09	1.23409e+09	1.19016e+09
High	High	Master Protein	O15381	Nuclear valosin-containing protein-like OS=Homo sapiens GN=NVL PE=1 SV=1	0	0	54	38	498	38	1	856	95	6.48	11953	630.55	38	18	0	3.41156e+08	3.54529e+08	3.52415e+08	456977118	4.66843e+08	4.87776e+08	4.55021e+08	477793475	4.72503e+08
High	High	Master Protein	Q86UE4	Protein LYRIC OS=Homo sapiens GN=MTDH PE=1 SV=2	0	0	53	27	510	27	1	582	63.8	9.32	12678	629.39	27	19	0	5.02144e+08	4.66273e+08	4.94415e+08	5.89585e+08	6.17426e+08	6.0777e+08	7.2823e+08	7.88472e+08	7.46386e+08
High	High	Master Protein	Q5TH69	Brefeldin A-inhibited guanine nucleotide-exchange protein 3 OS=Homo sapiens GN=ARFGEF3 PE=1 SV=3	0	0	42	74	656	73	1	2177	240.5	5.82	17235	629.1	72	36	0	3.66394e+08	3.67477e+08	3.74638e+08	4.28773e+08	4.35203e+08	4.43284e+08	4.51987e+08	4.62636e+08	4.651e+08	Acetyl [N-Term]
High	High	Master Protein	P53992	Protein transport protein Sec24C OS=Homo sapiens GN=SEC24C PE=1 SV=3	0	0	47	37	583	33	1	1094	118.2	7.06	13675	625.36	37	22	3	5.93982e+08	613907932	6.78523e+08	8.07754e+08	9.06699e+08	8.90885e+08	9.13637e+08	9.50615e+08	9.53616e+08
High	High	Master Protein	P47897	Glutamine--tRNA ligase OS=Homo sapiens GN=QARS PE=1 SV=1	0	0	67	52	699	51	1	775	87.7	7.15	15850	624.82	52	21	0	1.6778e+09	1.54495e+09	1.60888e+09	2.10462e+09	2.55734e+09	2.40326e+09	2.55739e+09	2.64372e+09	2.79085e+09	Acetyl [N-Term]
High	High	Master Protein	P54105	Methylosome subunit pICln OS=Homo sapiens GN=CLNS1A PE=1 SV=1	0	0	56	8	373	8	1	237	26.2	4.11	9283	624.76	8	7	0	1.93161e+08	1.92435e+08	1.74596e+08	1.52886e+08	1.55468e+08	1.5113e+08	2.80535e+08	2.85369e+08	2.86637e+08
High	High	Master Protein	Q15021	Condensin complex subunit 1 OS=Homo sapiens GN=NCAPD2 PE=1 SV=3	0	0	48	54	607	54	1	1401	157.1	6.61	13573	623.79	54	24	0	5.12749e+08	5.17922e+08	5.21714e+08	5.12912e+08	533334555	5.04027e+08	5.23549e+08	5.23027e+08	5.55411e+08
High	High	Master Protein	Q9BQG0	Myb-binding protein 1A OS=Homo sapiens GN=MYBBP1A PE=1 SV=2	0	0	52	64	772	64	1	1328	148.8	9.28	17864	623.32	63	28	0	6.60068e+08	6.23013e+08	6.23827e+08	7.65326e+08	8.24987e+08	8.34319e+08	9.26992e+08	9.83504e+08	1.01262e+09	Acetyl [N-Term]
High	High	Master Protein	P54886	Delta-1-pyrroline-5-carboxylate synthase OS=Homo sapiens GN=ALDH18A1 PE=1 SV=2	0	0	59	45	665	45	1	795	87.2	7.12	16061	622.11	44	27	0	8.30313e+08	8.27999e+08	8.56681e+08	1.06645e+09	1.12903e+09	1.13019e+09	1.38981e+09	1.37219e+09	1.38928e+09
High	High	Master Protein	Q9BQ52	Zinc phosphodiesterase ELAC protein 2 OS=Homo sapiens GN=ELAC2 PE=1 SV=2	0	0	73	41	490	41	1	826	92.2	7.9	10784	621.59	38	26	0	2.93666e+08	2.82891e+08	2.96328e+08	3.55372e+08	3.75677e+08	3.75184e+08	4.07598e+08	4.24075e+08	4.16365e+08
High	High	Master Protein	O15067	Phosphoribosylformylglycinamidine synthase OS=Homo sapiens GN=PFAS PE=1 SV=4	0	0	47	44	543	44	1	1338	144.6	5.76	12389	621.04	44	24	0	4.31275e+08	4.37621e+08	4.40836e+08	5.47267e+08	5.63565e+08	5.5008e+08	5.52865e+08	5.69869e+08	5.99316e+08
High	High	Master Protein	Q9NR45	Sialic acid synthase OS=Homo sapiens GN=NANS PE=1 SV=2	0	0	68	21	564	21	1	359	40.3	6.74	13914	620.45	21	13	0	1.03718e+09	1.02034e+09	9.75652e+08	1.18694e+09	1.24633e+09	1.24662e+09	1.29685e+09	1.34418e+09	1.38866e+09
High	High	Master Protein	Q13561	Dynactin subunit 2 OS=Homo sapiens GN=DCTN2 PE=1 SV=4	0	0	77	20	470	20	1	401	44.2	5.21	10492	619.14	20	13	0	6.88994e+08	6.74979e+08	7.12118e+08	8.71685e+08	9.32085e+08	8.52413e+08	1.00526e+09	1.01866e+09	1.07928e+09
High	High	Master Protein	Q16531	DNA damage-binding protein 1 OS=Homo sapiens GN=DDB1 PE=1 SV=1	0	0	54	58	747	58	1	1140	126.9	5.26	15657	617.15	57	27	0	1.06054e+09	1.03615e+09	1.15317e+09	1.31876e+09	1.38062e+09	1.41014e+09	1.62203e+09	1.62918e+09	1.65535e+09	Acetyl [N-Term]
High	High	Master Protein	O60684	Importin subunit alpha-7 OS=Homo sapiens GN=KPNA6 PE=1 SV=1	0	0	39	20	419	7	1	536	60	4.98	9290	614.84	20	12	2	1.34732e+08	1.60168e+08	147214060	1.54312e+08	1.56653e+08	1.56163e+08	1.93528e+08	2.06447e+08	2.09816e+08	Acetyl [N-Term]
High	High	Master Protein	Q05682	Caldesmon OS=Homo sapiens GN=CALD1 PE=1 SV=3	0	0	39	40	711	39	1	793	93.2	5.66	20860	614.66	40	19	1	994399061	9.39753e+08	9.59642e+08	1.04597e+09	1.15411e+09	1.06317e+09	1.41246e+09	1.49112e+09	1.42143e+09
High	High	Master Protein	P11413	Glucose-6-phosphate 1-dehydrogenase OS=Homo sapiens GN=G6PD PE=1 SV=4	0	0	78	39	672	39	1	515	59.2	6.84	15708	614.22	39	16	0	1.61327e+09	1.5533e+09	1.56848e+09	1.8042e+09	1.87642e+09	2.00489e+09	2.12199e+09	2.23334e+09	2.26502e+09	Acetyl [N-Term]
High	High	Master Protein	Q8WUM0	Nuclear pore complex protein Nup133 OS=Homo sapiens GN=NUP133 PE=1 SV=2	0	0	51	45	518	45	1	1156	128.9	5.1	10823	613.82	45	25	0	4.33381e+08	4.54633e+08	4.41182e+08	5.15879e+08	5.41378e+08	5.5137e+08	5.99844e+08	6.31817e+08	6.61183e+08	Acetyl [N-Term]
High	High	Master Protein	P51665	26S proteasome non-ATPase regulatory subunit 7 OS=Homo sapiens GN=PSMD7 PE=1 SV=2	0	0	57	15	382	15	1	324	37	6.77	8800	611.47	15	11	0	6.28551e+08	6.35442e+08	6.74295e+08	8.86014e+08	1.01055e+09	1.10937e+09	1.07542e+09	1.18035e+09	1.08118e+09
High	High	Master Protein	Q9Y446	Plakophilin-3 OS=Homo sapiens GN=PKP3 PE=1 SV=1	0	0	58	40	576	40	1	797	87	9.32	12834	611.25	40	23	0	5.13628e+08	5.02625e+08	5.20468e+08	6.46824e+08	6.66934e+08	6.54095e+08	6.84144e+08	7.28553e+08	6.99715e+08
High	High	Master Protein	P13489	Ribonuclease inhibitor OS=Homo sapiens GN=RNH1 PE=1 SV=2	0	0	71	21	473	21	1	461	49.9	4.82	12435	610.59	21	14	0	5.62804e+08	5.71507e+08	5.89672e+08	7.72785e+08	8.3626e+08	8.08906e+08	9.15e+08	9.62752e+08	9.42981e+08	Acetyl [N-Term]
High	High	Master Protein	P08758	Annexin A5 OS=Homo sapiens GN=ANXA5 PE=1 SV=2	0	0	79	27	634	26	1	320	35.9	5.05	15414	610.48	27	10	1	3.3969e+09	3.56618e+09	3.62094e+09	4.48257e+09	4.55249e+09	4.54936e+09	4.56443e+09	4.43361e+09	4.50551e+09
High	High	Master Protein	Q9C0D5	Protein TANC1 OS=Homo sapiens GN=TANC1 PE=1 SV=3	0	0	52	72	631	72	1	1861	202.1	8.32	14782	610.13	71	36	0	3.0496e+08	3.00986e+08	3.00771e+08	3.55789e+08	3.62706e+08	3.46729e+08	4.02145e+08	4.1535e+08	4.1688e+08
High	High	Master Protein	P50502	Hsc70-interacting protein OS=Homo sapiens GN=ST13 PE=1 SV=2	0	0	46	19	571	3	1	369	41.3	5.27	11386	608.56	19	8	19	2.52909e+09	2.46771e+09	2.6712e+09	2.91975e+09	3.16215e+09	2.93518e+09	3.04001e+09	3.07711e+09	3.27177e+09
High	High	Master Protein	P63220	40S ribosomal protein S21 OS=Homo sapiens GN=RPS21 PE=1 SV=1	0	0	60	7	432	7	1	83	9.1	8.5	11511	607.94	7	5	0	1.69314e+09	1.70896e+09	1.63535e+09	2.04776e+09	2.34415e+09	2.25543e+09	2.19195e+09	2.44731e+09	2.52981e+09	Acetyl [N-Term]
High	High	Master Protein	P62495	Eukaryotic peptide chain release factor subunit 1 OS=Homo sapiens GN=ETF1 PE=1 SV=3	0	0	56	25	558	25	1	437	49	5.71	13501	607.63	25	13	0	1.24983e+09	1.2106e+09	1.18891e+09	1.47356e+09	1.53449e+09	1.51465e+09	1.48517e+09	1.54011e+09	1.51443e+09	Acetyl [N-Term]
High	High	Master Protein	O94906	Pre-mRNA-processing factor 6 OS=Homo sapiens GN=PRPF6 PE=1 SV=1	0	0	63	57	678	57	1	941	106.9	8.25	17272	606.4	56	26	0	6.17063e+08	5.92804e+08	6.64213e+08	7.29984e+08	7.32442e+08	7.67026e+08	8.19159e+08	9.09175e+08	8.72668e+08
High	High	Master Protein	Q7L2H7	Eukaryotic translation initiation factor 3 subunit M OS=Homo sapiens GN=EIF3M PE=1 SV=1	0	0	51	16	432	16	1	374	42.5	5.63	9578	606.18	16	12	0	6.51229e+08	6.5336e+08	6.75044e+08	796839320	8.22579e+08	8.48478e+08	8.71544e+08	8.08088e+08	8.19767e+08	Acetyl [N-Term]
High	High	Master Protein	Q99873	Protein arginine N-methyltransferase 1 OS=Homo sapiens GN=PRMT1 PE=1 SV=2	0	0	66	23	634	23	1	361	41.5	5.43	14835	605.78	23	15	0	2.03338e+09	2.01403e+09	2.00501e+09	2.59376e+09	2.64071e+09	2.73086e+09	2.76308e+09	2.81779e+09	2.69219e+09
High	High	Master Protein	P45954	Short/branched chain specific acyl-CoA dehydrogenase, mitochondrial OS=Homo sapiens GN=ACADSB PE=1 SV=1	0	0	44	17	405	17	1	432	47.5	6.99	8484	605.66	17	12	0	3.3479e+08	3.14239e+08	3.46217e+08	4.35318e+08	4.89791e+08	4.43749e+08	5.20354e+08	5.43283e+08	5.22238e+08
High	High	Master Protein	P02786	Transferrin receptor protein 1 OS=Homo sapiens GN=TFRC PE=1 SV=2	0	0	51	33	616	33	1	760	84.8	6.61	15457	604.85	33	17	0	1.62471e+09	1.59854e+09	1.62229e+09	1.38316e+09	1.48557e+09	1.50079e+09	1.72454e+09	1.77257e+09	1.80421e+09
High	High	Master Protein	Q15020	Squamous cell carcinoma antigen recognized by T-cells 3 OS=Homo sapiens GN=SART3 PE=1 SV=1	0	0	55	49	618	49	1	963	109.9	5.57	14934	604.34	49	19	0	5.17187e+08	5.08098e+08	5.23368e+08	6.22298e+08	6.47355e+08	6.46267e+08	7.14269e+08	7.55844e+08	7.61446e+08	Acetyl [N-Term]
High	High	Master Protein	P21281	V-type proton ATPase subunit B, brain isoform OS=Homo sapiens GN=ATP6V1B2 PE=1 SV=3	0	0	76	29	498	29	1	511	56.5	5.81	11212	600.94	29	20	0	6.68995e+08	6.31465e+08	6.73297e+08	7.03185e+08	7.9451e+08	8.20046e+08	8.8031e+08	9.4088e+08	9.67692e+08
High	High	Master Protein	Q86XP3	ATP-dependent RNA helicase DDX42 OS=Homo sapiens GN=DDX42 PE=1 SV=1	0	0	61	43	560	43	1	938	102.9	7.02	13225	600.8	43	22	0	4.87282e+08	5.05445e+08	5.05788e+08	6.14355e+08	6.07157e+08	6.25752e+08	6.70804e+08	6.70353e+08	7.03669e+08
High	High	Master Protein	Q14683	Structural maintenance of chromosomes protein 1A OS=Homo sapiens GN=SMC1A PE=1 SV=2	0	0	64	89	863	87	1	1233	143.1	7.64	21502	599.03	87	33	2	1.06758e+09	1.02991e+09	1.09894e+09	1.19306e+09	1.23805e+09	1.25387e+09	1.1701e+09	1.225e+09	1.24894e+09
High	High	Master Protein	Q93008	Probable ubiquitin carboxyl-terminal hydrolase FAF-X OS=Homo sapiens GN=USP9X PE=1 SV=3	0	0	42	89	758	49	1	2570	292.1	5.8	18016	598.55	89	36	40	4.93856e+08	4.98196e+08	5.06927e+08	5.51141e+08	6.22373e+08	5.97286e+08	5.92248e+08	6.00862e+08	6.21721e+08
High	High	Master Protein	P49755	Transmembrane emp24 domain-containing protein 10 OS=Homo sapiens GN=TMED10 PE=1 SV=2	0	0	42	12	383	11	1	219	25	7.44	9433	598.42	12	5	0	6.93115e+08	6.88085e+08	6.64505e+08	7.84876e+08	7.94291e+08	8.06187e+08	854048328	9.28307e+08	8.61402e+08
High	High	Master Protein	P52788	Spermine synthase OS=Homo sapiens GN=SMS PE=1 SV=2	0	0	82	22	412	22	1	366	41.2	5.02	7273	597.79	22	12	0	4.54734e+08	4.25361e+08	4.10771e+08	4.59511e+08	500712000	4.75763e+08	5.97647e+08	5.78194e+08	6.05507e+08
High	High	Master Protein	Q15067	Peroxisomal acyl-coenzyme A oxidase 1 OS=Homo sapiens GN=ACOX1 PE=1 SV=3	0	0	60	31	510	31	1	660	74.4	8.16	10339	597.28	31	21	0	5.06836e+08	521989663	5.43904e+08	6.3756e+08	6.72681e+08	6.77036e+08	7.63434e+08	8.2882e+08	8.23526e+08	Acetyl [N-Term]
High	High	Master Protein	P09622	Dihydrolipoyl dehydrogenase, mitochondrial OS=Homo sapiens GN=DLD PE=1 SV=2	0	0	46	17	451	17	1	509	54.1	7.85	11221	596.92	16	11	0	1.12585e+09	1.19682e+09	1.24846e+09	1.63412e+09	1.69557e+09	1.68668e+09	1.97897e+09	2.02738e+09	2.08532e+09
High	High	Master Protein	P04632	Calpain small subunit 1 OS=Homo sapiens GN=CAPNS1 PE=1 SV=1	0	0	81	15	349	15	1	268	28.3	5.2	9766	595.26	14	8	0	3.6633e+08	3.88541e+08	3.57498e+08	4.66734e+08	5.83525e+08	5.27466e+08	5.23057e+08	6.14564e+08	5.80098e+08	Acetyl [N-Term]
High	High	Master Protein	Q709C8	Vacuolar protein sorting-associated protein 13C OS=Homo sapiens GN=VPS13C PE=1 SV=1	0	0	35	101	620	100	1	3753	422.1	6.83	13653	595.13	98	41	1	2.45091e+08	2.36487e+08	2.4315e+08	2.86749e+08	2.94868e+08	2.91197e+08	3.33068e+08	3.32848e+08	3.39549e+08
High	High	Master Protein	Q92896	Golgi apparatus protein 1 OS=Homo sapiens GN=GLG1 PE=1 SV=2	0	0	50	49	556	49	1	1179	134.5	6.9	12509	593.64	49	23	0	5.02143e+08	4.99452e+08	5.06603e+08	7.22974e+08	7.82308e+08	7.2992e+08	7.01593e+08	7.28982e+08	7.33539e+08
High	High	Master Protein	P30622	CAP-Gly domain-containing linker protein 1 OS=Homo sapiens GN=CLIP1 PE=1 SV=2	0	0	48	63	541	57	1	1438	162.1	5.36	12964	593.57	62	34	6	2.24419e+08	2.03746e+08	2.22573e+08	2.84191e+08	3.00978e+08	3.14594e+08	3.5955e+08	3.64196e+08	3.66577e+08
High	High	Master Protein	Q9H2M9	Rab3 GTPase-activating protein non-catalytic subunit OS=Homo sapiens GN=RAB3GAP2 PE=1 SV=1	0	0	44	50	530	49	1	1393	155.9	5.62	11209	593.47	49	23	1	3.06655e+08	3.02956e+08	3.1653e+08	362318146	3.91903e+08	3.81983e+08	4.40281e+08	4.41602e+08	4.40411e+08
High	High	Master Protein	Q92905	COP9 signalosome complex subunit 5 OS=Homo sapiens GN=COPS5 PE=1 SV=4	0	0	61	18	431	18	1	334	37.6	6.54	8787	593.46	18	11	0	4.25119e+08	4.03728e+08	4.50888e+08	5.26433e+08	5.77635e+08	5.74845e+08	5.51033e+08	5.5351e+08	5.2126e+08	Acetyl [N-Term]
High	High	Master Protein	Q9UKG1	DCC-interacting protein 13-alpha OS=Homo sapiens GN=APPL1 PE=1 SV=1	0	0	54	30	450	30	1	709	79.6	5.41	11338	593.25	30	15	0	2.7757e+08	2.43858e+08	2.67589e+08	3.02482e+08	3.25433e+08	3.19737e+08	3.26466e+08	3.58161e+08	3.71304e+08
High	High	Master Protein	Q9UBT2	SUMO-activating enzyme subunit 2 OS=Homo sapiens GN=UBA2 PE=1 SV=2	0	0	58	33	446	33	1	640	71.2	5.29	9516	591.15	33	20	0	4.81171e+08	4.65515e+08	4.74081e+08	5.50972e+08	5.49335e+08	5.81872e+08	6.04648e+08	6.01503e+08	6.27091e+08
High	High	Master Protein	O43396	Thioredoxin-like protein 1 OS=Homo sapiens GN=TXNL1 PE=1 SV=3	0	0	69	21	511	21	1	289	32.2	4.96	12226	591.08	21	12	0	7.15507e+08	7.3704e+08	8.02342e+08	9.13229e+08	1.00705e+09	9.69336e+08	1.18454e+09	1.21832e+09	1232082706	Acetyl [N-Term; N-Term]
High	High	Master Protein	Q6YN16	Hydroxysteroid dehydrogenase-like protein 2 OS=Homo sapiens GN=HSDL2 PE=1 SV=1	0	0	72	28	441	28	1	418	45.4	7.99	9011	590.33	28	18	0	3.27251e+08	3.13012e+08	3.45082e+08	3.92173e+08	4.34572e+08	4.11919e+08	4.64473e+08	4.41697e+08	4.76887e+08
High	High	Master Protein	O94826	Mitochondrial import receptor subunit TOM70 OS=Homo sapiens GN=TOMM70 PE=1 SV=1	0	0	66	34	545	34	1	608	67.4	7.12	12364	590.3	34	16	0	7.02057e+08	7.36504e+08	7.43528e+08	9.39595e+08	9.52094e+08	9.52542e+08	1.20522e+09	1.3062e+09	1.25871e+09	Acetyl [N-Term]
High	High	Master Protein	O75694	Nuclear pore complex protein Nup155 OS=Homo sapiens GN=NUP155 PE=1 SV=1	0	0	45	43	560	43	1	1391	155.1	6.16	13728	589.97	43	24	0	5.64548e+08	5.6347e+08	6.12224e+08	6.58045e+08	7.10834e+08	7.35374e+08	6.69745e+08	6.96353e+08	6.65465e+08
High	High	Master Protein	O75592	E3 ubiquitin-protein ligase MYCBP2 OS=Homo sapiens GN=MYCBP2 PE=1 SV=3	0	0	32	114	669	114	1	4640	509.8	7.03	15485	589.64	109	45	0	229528719	2.28968e+08	2.43581e+08	2.79339e+08	2.92892e+08	2.85917e+08	3.45576e+08	3.19767e+08	3.42534e+08
High	High	Master Protein	P62191	26S protease regulatory subunit 4 OS=Homo sapiens GN=PSMC1 PE=1 SV=1	0	0	70	31	602	29	1	440	49.2	6.21	13444	589.07	31	13	0	8.90759e+08	9.23961e+08	1.06514e+09	1.07158e+09	1.208e+09	1.11014e+09	1.20138e+09	1.15715e+09	1.20533e+09
High	High	Master Protein	O00159	Unconventional myosin-Ic OS=Homo sapiens GN=MYO1C PE=1 SV=4	0	0	56	58	621	58	1	1063	121.6	9.41	13978	588.07	58	25	0	7.23195e+08	7.22046e+08	7.36419e+08	9.61666e+08	9.94549e+08	9.91906e+08	1.06493e+09	1.09724e+09	1.1226e+09
High	High	Master Protein	Q9GZR7	ATP-dependent RNA helicase DDX24 OS=Homo sapiens GN=DDX24 PE=1 SV=1	0	0	52	38	531	38	1	859	96.3	9.06	12711	587.7	37	18	0	2.02357e+08	1.87924e+08	1.94204e+08	2.98772e+08	3.0968e+08	3.24728e+08	3.79582e+08	3.80682e+08	3.73744e+08
High	High	Master Protein	A6NHR9	Structural maintenance of chromosomes flexible hinge domain-containing protein 1 OS=Homo sapiens GN=SMCHD1 PE=1 SV=2	0	0	51	98	924	98	1	2005	226.2	7.3	22975	586.34	96	37	0	1.0607e+09	1.01872e+09	1.08982e+09	1.25309e+09	1.27536e+09	1.24883e+09	1.23749e+09	1.28095e+09	1.31239e+09	Acetyl [N-Term]
High	High	Master Protein	Q13162	Peroxiredoxin-4 OS=Homo sapiens GN=PRDX4 PE=1 SV=1	0	0	62	18	514	15	1	271	30.5	6.29	11230	586.33	18	12	0	9.06367e+08	8.807e+08	9.47346e+08	9.69068e+08	1.05622e+09	1.03264e+09	1.29917e+09	1.34513e+09	1.39172e+09
High	High	Master Protein	Q14690	Protein RRP5 homolog OS=Homo sapiens GN=PDCD11 PE=1 SV=3	0	0	45	77	633	77	1	1871	208.6	8.87	14713	586.13	76	29	0	3.62768e+08	3.41901e+08	3.62275e+08	4.29059e+08	4.70866e+08	4.65806e+08	4.81189e+08	5.25424e+08	5.26779e+08	Acetyl [N-Term]
High	High	Master Protein	P98175	RNA-binding protein 10 OS=Homo sapiens GN=RBM10 PE=1 SV=3	0	0	47	39	535	36	1	930	103.5	5.97	11944	585.56	39	16	3	4.07686e+08	4.19182e+08	4.2801e+08	5.38816e+08	5.50383e+08	5.20971e+08	6.29022e+08	6.33472e+08	6.29803e+08
High	High	Master Protein	P52294	Importin subunit alpha-5 OS=Homo sapiens GN=KPNA1 PE=1 SV=3	0	0	36	21	391	9	1	538	60.2	5.01	7858	585.43	21	12	12	5.00253e+08	5.20406e+08	5.4797e+08	6.23311e+08	6.44393e+08	7.02848e+08	7.07614e+08	7.11537e+08	7.16123e+08
High	High	Master Protein	Q9BT78	COP9 signalosome complex subunit 4 OS=Homo sapiens GN=COPS4 PE=1 SV=1	0	0	72	25	507	25	1	406	46.2	5.83	12134	585.15	25	17	0	7.90005e+08	6.85237e+08	7.09081e+08	9.14476e+08	9.85509e+08	1.05817e+09	1.03163e+09	1.13065e+09	1.12691e+09
High	High	Master Protein	Q8NI35	InaD-like protein OS=Homo sapiens GN=PATJ PE=1 SV=3	0	0	49	58	474	57	1	1801	196.2	4.94	10979	584.61	57	26	1	1.74639e+08	1.75166e+08	1.86049e+08	2.27584e+08	2.33267e+08	2.36499e+08	1.71155e+08	1.82164e+08	1.7715e+08
High	High	Master Protein	Q99623	Prohibitin-2 OS=Homo sapiens GN=PHB2 PE=1 SV=2	0	0	64	18	592	18	1	299	33.3	9.83	14734	583.37	18	8	0	2.49915e+09	2.64369e+09	2.51136e+09	3.48134e+09	3.55569e+09	3.33854e+09	3.88596e+09	3.87971e+09	3.8756e+09
High	High	Master Protein	P12235	ADP/ATP translocase 1 OS=Homo sapiens GN=SLC25A4 PE=1 SV=4	0	0	56	19	655	4	1	298	33	9.76	11786	581.36	19	10	0	1.97615e+08	164700818	1.62852e+08	1.58924e+08	1.96974e+08	170084044	2.35057e+08	2.80163e+08	2.53916e+08	Acetyl [N-Term]
High	High	Master Protein	P39687	Acidic leucine-rich nuclear phosphoprotein 32 family member A OS=Homo sapiens GN=ANP32A PE=1 SV=1	0	0	45	15	450	11	1	249	28.6	4.09	9664	580.48	15	7	4	2.76787e+09	2.6376e+09	3.11654e+09	3.82256e+09	3.68205e+09	3.71079e+09	3.64536e+09	4.04078e+09	4.0976e+09
High	High	Master Protein	Q9UKV3	Apoptotic chromatin condensation inducer in the nucleus OS=Homo sapiens GN=ACIN1 PE=1 SV=2	0	0	47	58	711	57	1	1341	151.8	6.43	15806	579.29	58	25	1	6.01832e+08	5.88734e+08	6.14581e+08	7.54433e+08	8.0229e+08	8.02097e+08	1.07668e+09	1.13346e+09	1.14426e+09
High	High	Master Protein	Q13428	Treacle protein OS=Homo sapiens GN=TCOF1 PE=1 SV=3	0	0	38	53	607	53	1	1488	152	9.04	16287	577.4	52	28	0	6.23843e+08	6.10537e+08	6.57631e+08	6.58161e+08	6.69758e+08	6.71781e+08	9.13351e+08	9.06597e+08	8.99065e+08
High	High	Master Protein	Q96TA1	Niban-like protein 1 OS=Homo sapiens GN=FAM129B PE=1 SV=3	0	0	55	33	467	33	1	746	84.1	6.19	9565	576.33	33	15	0	4.25276e+08	4.17817e+08	4.40788e+08	4.92526e+08	5.50326e+08	5.34373e+08	4.92603e+08	4.72362e+08	4.93962e+08	Acetyl [N-Term]
High	High	Master Protein	P35998	26S protease regulatory subunit 7 OS=Homo sapiens GN=PSMC2 PE=1 SV=3	0	0	70	31	689	30	1	433	48.6	5.95	16852	575.98	31	13	0	1.76909e+09	1.79075e+09	1.72065e+09	2.43482e+09	2.36704e+09	2.35828e+09	2.47259e+09	2.44865e+09	2.4339e+09
High	High	Master Protein	P30876	DNA-directed RNA polymerase II subunit RPB2 OS=Homo sapiens GN=POLR2B PE=1 SV=1	0	0	49	50	562	50	1	1174	133.8	6.87	12291	574.45	50	24	0	3.56175e+08	3.6042e+08	3.55504e+08	4.3466e+08	4.49053e+08	4.36278e+08	4.62651e+08	4.56353e+08	4.52898e+08
High	High	Master Protein	Q9UHD8	Septin-9 OS=Homo sapiens GN=SEPT9 PE=1 SV=2	0	0	68	42	642	41	1	586	65.4	8.97	14806	573.75	42	19	2	1.31032e+09	1.22053e+09	1.2832e+09	1599034472	1.57631e+09	1.6102e+09	1746382106	1.63013e+09	1.72451e+09
High	High	Master Protein	Q9Y262	Eukaryotic translation initiation factor 3 subunit L OS=Homo sapiens GN=EIF3L PE=1 SV=1	0	0	63	31	483	31	1	564	66.7	6.34	12250	573.64	29	13	0	1.22147e+09	1.19483e+09	1.20887e+09	1.47227e+09	1.5548e+09	1.51694e+09	1.57133e+09	1.48047e+09	1.56956e+09	Acetyl [N-Term]
High	High	Master Protein	P28066	Proteasome subunit alpha type-5 OS=Homo sapiens GN=PSMA5 PE=1 SV=3	0	0	66	12	401	12	1	241	26.4	4.79	9611	570.86	12	10	0	1.31712e+09	1.29734e+09	1.32822e+09	1.4015e+09	1.49115e+09	1.58979e+09	1.61406e+09	1.81056e+09	1.78428e+09
High	High	Master Protein	P49189	4-trimethylaminobutyraldehyde dehydrogenase OS=Homo sapiens GN=ALDH9A1 PE=1 SV=3	0	0	61	31	602	31	1	494	53.8	5.87	15061	570.74	30	16	0	1.721e+09	1.75274e+09	1.67043e+09	2.3252e+09	2.26198e+09	2.3214e+09	2.54889e+09	2.63423e+09	2.664e+09	Acetyl [N-Term]
High	High	Master Protein	P12236	ADP/ATP translocase 3 OS=Homo sapiens GN=SLC25A6 PE=1 SV=4	0	0	65	24	759	6	1	298	32.8	9.74	14592	570.24	24	10	24	4.42015e+09	4.12773e+09	4.33414e+09	5.34117e+09	5.24808e+09	5.35412e+09	6.8238e+09	6.84597e+09	7.47932e+09	Acetyl [N-Term; N-Term]
High	High	Master Protein	Q5VTR2	E3 ubiquitin-protein ligase BRE1A OS=Homo sapiens GN=RNF20 PE=1 SV=2	0	0	48	48	519	42	1	975	113.6	5.94	12094	570.09	47	24	0	2.90886e+08	2.99414e+08	3.09231e+08	3.35903e+08	3.48411e+08	3.51438e+08	4.0069e+08	4.09186e+08	4.10774e+08
High	High	Master Protein	Q9H3P7	Golgi resident protein GCP60 OS=Homo sapiens GN=ACBD3 PE=1 SV=4	0	0	62	25	409	23	1	528	60.6	5.06	9636	569.8	25	16	0	3.0641e+08	3.19474e+08	3.27441e+08	3.59547e+08	3.66171e+08	3.76926e+08	3.83671e+08	3.58835e+08	3.90889e+08	Acetyl [N-Term]
High	High	Master Protein	Q15293	Reticulocalbin-1 OS=Homo sapiens GN=RCN1 PE=1 SV=1	0	0	75	20	420	20	1	331	38.9	5	8265	569.59	20	10	0	9.68353e+08	9.29075e+08	9.89482e+08	1151730673	1.22332e+09	1.22054e+09	1.41057e+09	1.40385e+09	1.33321e+09
High	High	Master Protein	O94874	E3 UFM1-protein ligase 1 OS=Homo sapiens GN=UFL1 PE=1 SV=2	0	0	51	41	669	41	1	794	89.5	6.79	16095	569.27	41	19	0	8.44008e+08	8.49756e+08	8.84703e+08	1.13284e+09	1.17274e+09	1.15452e+09	1.20404e+09	1.24285e+09	1.23731e+09	Acetyl [N-Term]
High	High	Master Protein	O43399	Tumor protein D54 OS=Homo sapiens GN=TPD52L2 PE=1 SV=2	0	0	81	18	398	18	1	206	22.2	5.36	9529	568.86	18	12	0	8.117e+08	7.7872e+08	8.95739e+08	1.01516e+09	1.02526e+09	1.07477e+09	1.00173e+09	1.01153e+09	9.7817e+08	Acetyl [N-Term]
High	High	Master Protein	Q9BUF5	Tubulin beta-6 chain OS=Homo sapiens GN=TUBB6 PE=1 SV=1	0	0	43	15	908	3	1	446	49.8	4.88	18955	568.7	15	11	0	20147881	1.9835e+07	19085004	28825513	2.70603e+07	29208618	2.18324e+07	2.37504e+07	23901646
High	High	Master Protein	O94973	AP-2 complex subunit alpha-2 OS=Homo sapiens GN=AP2A2 PE=1 SV=2	0	0	53	40	583	31	1	939	103.9	6.96	13879	567.2	39	24	0	3.65227e+08	3.89578e+08	3.73115e+08	4.64179e+08	4.71215e+08	5.24984e+08	5.00871e+08	4.80213e+08	5.32901e+08
High	High	Master Protein	Q9BWF3	RNA-binding protein 4 OS=Homo sapiens GN=RBM4 PE=1 SV=1	0	0	71	21	408	7	1	364	40.3	7.08	10088	566.49	21	8	16	5.56985e+08	5.51323e+08	5.8076e+08	7.30403e+08	7.86293e+08	7.79641e+08	7.6184e+08	7.27692e+08	7.56998e+08
High	High	Master Protein	Q53SF7	Cordon-bleu protein-like 1 OS=Homo sapiens GN=COBLL1 PE=1 SV=2	0	0	62	59	520	59	1	1204	131.7	6.67	11149	565.37	58	37	0	1.78755e+08	1.75496e+08	1.81838e+08	2.5406e+08	2.69385e+08	2.86509e+08	2.69643e+08	2.94519e+08	2.91306e+08
High	High	Master Protein	P35241	Radixin OS=Homo sapiens GN=RDX PE=1 SV=1	0	0	73	52	629	35	1	583	68.5	6.37	12528	564.85	52	21	20	1.45513e+09	1.4259e+09	1.41126e+09	1.9034e+09	1.99581e+09	2.07797e+09	2.23149e+09	2.44842e+09	2.51317e+09
High	High	Master Protein	Q7LBC6	Lysine-specific demethylase 3B OS=Homo sapiens GN=KDM3B PE=1 SV=2	0	0	55	64	512	62	1	1761	191.5	7.18	11109	564.64	64	36	2	1.96404e+08	1.84871e+08	1.94773e+08	2.37563e+08	2.70021e+08	2.57574e+08	2.25502e+08	2.24218e+08	2.33712e+08	Acetyl [N-Term]
High	High	Master Protein	P23381	Tryptophan--tRNA ligase, cytoplasmic OS=Homo sapiens GN=WARS PE=1 SV=2	0	0	73	27	476	27	1	471	53.1	6.23	10186	564.16	26	16	0	1.25579e+09	1.1691e+09	1.18049e+09	1.67449e+09	1.64075e+09	1.56956e+09	1.72138e+09	1.70057e+09	1811847200
High	High	Master Protein	Q9UPQ9	Trinucleotide repeat-containing gene 6B protein OS=Homo sapiens GN=TNRC6B PE=1 SV=4	0	0	50	60	524	60	1	1833	193.9	6.76	14205	562.78	58	39	0	1.54817e+08	1.57435e+08	1.76044e+08	2.06327e+08	2.03485e+08	2.05434e+08	1.93762e+08	2.18488e+08	1.99318e+08
High	High	Master Protein	P55268	Laminin subunit beta-2 OS=Homo sapiens GN=LAMB2 PE=1 SV=2	0	0	49	65	581	65	1	1798	195.9	6.52	14057	562.35	63	33	0	2.31664e+08	2.43278e+08	2.73746e+08	3.27728e+08	3.66295e+08	3.29818e+08	3.82628e+08	3.80946e+08	3.92159e+08
High	High	Master Protein	O95071	E3 ubiquitin-protein ligase UBR5 OS=Homo sapiens GN=UBR5 PE=1 SV=2	0	0	37	80	626	80	1	2799	309.2	5.85	14288	560.59	79	36	0	2.8947e+08	2.90935e+08	3.02103e+08	3.69559e+08	3.87826e+08	3.94006e+08	4.23509e+08	4.40002e+08	4.36229e+08	Acetyl [N-Term]
High	High	Master Protein	Q13564	NEDD8-activating enzyme E1 regulatory subunit OS=Homo sapiens GN=NAE1 PE=1 SV=1	0	0	65	26	428	26	1	534	60.2	5.4	8552	559.18	25	14	0	5.18879e+08	5.23e+08	5.35622e+08	6.63079e+08	6.60192e+08	6.34446e+08	7.3097e+08	7.46578e+08	7.49866e+08
High	High	Master Protein	Q01844	RNA-binding protein EWS OS=Homo sapiens GN=EWSR1 PE=1 SV=1	0	0	18	10	462	10	1	656	68.4	9.33	12145	558.57	10	5	0	5.78399e+08	6.27719e+08	5.94028e+08	8.70925e+08	9.37123e+08	9.15581e+08	1.05547e+09	1.13966e+09	1.01716e+09
High	High	Master Protein	Q99575	Ribonucleases P/MRP protein subunit POP1 OS=Homo sapiens GN=POP1 PE=1 SV=2	0	0	55	44	483	44	1	1024	114.6	9.22	12138	558.27	43	27	0	2.36819e+08	2.24339e+08	2.34851e+08	3.11867e+08	3.20806e+08	3.18614e+08	305426292	3.06516e+08	2.93048e+08
High	High	Master Protein	Q92841	Probable ATP-dependent RNA helicase DDX17 OS=Homo sapiens GN=DDX17 PE=1 SV=2	0	0	62	43	712	34	1	729	80.2	8.27	18099	557.12	43	18	0	1.58914e+09	1.56203e+09	1.53168e+09	1.93608e+09	1.87541e+09	1.84511e+09	2.03675e+09	1.99533e+09	2.04649e+09
High	High	Master Protein	P62979	Ubiquitin-40S ribosomal protein S27a OS=Homo sapiens GN=RPS27A PE=1 SV=2	0	0	53	8	1014	3	1	156	18	9.64	24927	557.06	8	6	5	1.17379e+10	1.16899e+10	1.17879e+10	1.22087e+10	13128593583	1.32073e+10	1.41701e+10	1.51333e+10	1.42912e+10
High	High	Master Protein	P53675	Clathrin heavy chain 2 OS=Homo sapiens GN=CLTCL1 PE=1 SV=2	0	0	13	21	599	1	1	1640	186.9	5.85	14687	557.06	21	18	0
High	High	Master Protein	Q9Y4E1	WASH complex subunit 2C OS=Homo sapiens GN=WASHC2C PE=1 SV=3	0	0	44	43	429	12	1	1318	144.6	4.79	9223	556.89	41	28	0	1.09684e+07	1.27427e+07	1.13019e+07	1.1936e+07	1.30839e+07	1.07444e+07	1.56855e+07	1.43844e+07	1.61797e+07
High	High	Master Protein	P54727	UV excision repair protein RAD23 homolog B OS=Homo sapiens GN=RAD23B PE=1 SV=1	0	0	54	17	470	14	1	409	43.1	4.84	11084	556.87	17	9	4	1.89977e+09	1.86413e+09	2.01076e+09	2.45048e+09	2.55073e+09	2.69618e+09	2.80394e+09	3.13043e+09	3.16507e+09
High	High	Master Protein	Q8N1G4	Leucine-rich repeat-containing protein 47 OS=Homo sapiens GN=LRRC47 PE=1 SV=1	0	0	71	36	555	36	1	583	63.4	8.28	14357	555.35	35	19	0	9.26819e+08	8.97373e+08	9.68509e+08	1.20807e+09	1.30443e+09	1.35036e+09	1.37158e+09	1.52353e+09	1.52444e+09	Acetyl [N-Term]
High	High	Master Protein	P30050	60S ribosomal protein L12 OS=Homo sapiens GN=RPL12 PE=1 SV=1	0	0	59	7	449	7	1	165	17.8	9.42	11077	555	7	5	0	2.11329e+09	2.47533e+09	2.28076e+09	2.83e+09	2.97587e+09	2.89546e+09	3.25414e+09	3.12441e+09	3.20401e+09
High	High	Master Protein	O14981	TATA-binding protein-associated factor 172 OS=Homo sapiens GN=BTAF1 PE=1 SV=2	0	0	38	56	519	56	1	1849	206.8	6.52	10960	553.9	56	24	0	2.1578e+08	2.11242e+08	2.19946e+08	2.42448e+08	246238009	2.56731e+08	2.82685e+08	2.79355e+08	2.79291e+08
High	High	Master Protein	P15311	Ezrin OS=Homo sapiens GN=EZR PE=1 SV=4	0	0	61	45	611	32	1	586	69.4	6.27	12066	552.74	45	19	1	9.70342e+08	9.46095e+08	9.87516e+08	1.21022e+09	1.29961e+09	1.26502e+09	1.4244e+09	1.46171e+09	1.39719e+09
High	High	Master Protein	Q9BYT8	Neurolysin, mitochondrial OS=Homo sapiens GN=NLN PE=1 SV=1	0	0	49	30	411	30	1	704	80.6	6.64	7766	552.69	30	14	0	4.10864e+08	4.01185e+08	3.9583e+08	4.75319e+08	4.9599e+08	4.80313e+08	5.43589e+08	5.62609e+08	5.41902e+08
High	High	Master Protein	P26038	Moesin OS=Homo sapiens GN=MSN PE=1 SV=3	0	0	70	49	627	34	1	577	67.8	6.4	14734	552.48	49	18	0	5.20876e+08	5.40446e+08	5.50793e+08	6.11533e+08	6.46632e+08	6.26497e+08	6.86251e+08	7.18006e+08	7.31289e+08
High	High	Master Protein	Q7Z2W4	Zinc finger CCCH-type antiviral protein 1 OS=Homo sapiens GN=ZC3HAV1 PE=1 SV=3	0	0	61	46	541	46	1	902	101.4	8.4	13215	551.66	44	20	0	7.89972e+08	7.76072e+08	7.83492e+08	1.01335e+09	1.00551e+09	9.86072e+08	1.03525e+09	1.09171e+09	1.09849e+09	Acetyl [N-Term]
High	High	Master Protein	O75521	Enoyl-CoA delta isomerase 2, mitochondrial OS=Homo sapiens GN=ECI2 PE=1 SV=4	0	0	47	15	410	15	1	394	43.6	9	9223	551.46	15	12	0	4.10594e+08	4.15158e+08	4.51965e+08	4.83293e+08	5.17416e+08	483484972	6.18713e+08	5.96252e+08	5.93831e+08
High	High	Master Protein	P48735	Isocitrate dehydrogenase [NADP], mitochondrial OS=Homo sapiens GN=IDH2 PE=1 SV=2	0	0	56	28	713	26	1	452	50.9	8.69	18542	551.45	28	13	2	2.43383e+09	2.24429e+09	2.40889e+09	2.82887e+09	3.08499e+09	3.21952e+09	3.324e+09	3.51844e+09	3.51663e+09
High	High	Master Protein	O95602	DNA-directed RNA polymerase I subunit RPA1 OS=Homo sapiens GN=POLR1A PE=1 SV=2	0	0	50	62	485	61	1	1720	194.7	7.03	10107	551.21	61	28	1	2.80656e+08	3.06154e+08	3.20999e+08	3.08637e+08	3.19621e+08	3.2071e+08	3.76195e+08	3.62949e+08	3.63859e+08
High	High	Master Protein	P17174	Aspartate aminotransferase, cytoplasmic OS=Homo sapiens GN=GOT1 PE=1 SV=3	0	0	60	20	396	20	1	413	46.2	7.01	7548	550.79	20	12	0	1.47749e+09	1.39903e+09	1.48933e+09	1.69208e+09	1.86718e+09	1.77837e+09	1.91523e+09	1.96127e+09	1.9795e+09
High	High	Master Protein	Q9UNM6	26S proteasome non-ATPase regulatory subunit 13 OS=Homo sapiens GN=PSMD13 PE=1 SV=2	0	0	71	27	508	27	1	376	42.9	5.81	12709	550.72	27	14	0	1.42754e+09	1.41443e+09	1.45288e+09	1.8589e+09	1.86104e+09	1.81735e+09	1.96934e+09	2.15096e+09	2.08077e+09
High	High	Master Protein	Q9H307	Pinin OS=Homo sapiens GN=PNN PE=1 SV=4	0	0	52	40	578	39	1	717	81.6	7.14	12027	549.84	40	18	0	7.61872e+08	7.16895e+08	7.62537e+08	8.98092e+08	9.41678e+08	9.23388e+08	9.81468e+08	9.92578e+08	9.86799e+08
High	High	Master Protein	Q14103	Heterogeneous nuclear ribonucleoprotein D0 OS=Homo sapiens GN=HNRNPD PE=1 SV=1	0	0	37	18	594	15	1	355	38.4	7.81	14058	549.76	18	11	3	4.60423e+09	4.63426e+09	4.88011e+09	5.70891e+09	5.7079e+09	5.51421e+09	5.55365e+09	5.8924e+09	5.41887e+09
High	High	Master Protein	P61158	Actin-related protein 3 OS=Homo sapiens GN=ACTR3 PE=1 SV=3	0	0	63	23	408	21	1	418	47.3	5.88	7956	549.15	22	16	2	7.02376e+08	6.95811e+08	6.99238e+08	1.04196e+09	9.43663e+08	9.78381e+08	9.53373e+08	9.84891e+08	9.66967e+08	Acetyl [N-Term]
High	High	Master Protein	P07339	Cathepsin D OS=Homo sapiens GN=CTSD PE=1 SV=1	0	0	56	20	461	20	1	412	44.5	6.54	10592	548.86	20	10	0	1.31137e+09	1.28652e+09	1.31768e+09	1.59475e+09	1.61448e+09	1.54128e+09	1.93339e+09	1.88084e+09	1.87667e+09
High	High	Master Protein	Q9UK76	Hematological and neurological expressed 1 protein OS=Homo sapiens GN=HN1 PE=1 SV=3	0	0	80	14	377	14	1	154	16	5.6	7893	548.02	14	10	0	1.63449e+09	1.79623e+09	1.83908e+09	1.57967e+09	1.75331e+09	1.97744e+09	2.02041e+09	1.93229e+09	2018205021	Acetyl [N-Term]
High	High	Master Protein	Q15181	Inorganic pyrophosphatase OS=Homo sapiens GN=PPA1 PE=1 SV=2	0	0	76	19	576	18	1	289	32.6	5.86	13945	546.56	19	9	0	2.16695e+09	2.04626e+09	2.27125e+09	2.79446e+09	2.85128e+09	2855829445	3.12988e+09	3.13385e+09	3.27969e+09	Acetyl [N-Term]
High	High	Master Protein	Q9H0A0	RNA cytidine acetyltransferase OS=Homo sapiens GN=NAT10 PE=1 SV=2	0	0	52	45	506	45	1	1025	115.7	8.27	11429	546.38	44	18	0	5.0407e+08	4.86917e+08	4.90912e+08	6.41594e+08	7.11329e+08	6.6388e+08	6.33887e+08	6.71067e+08	6.71374e+08
High	High	Master Protein	Q641Q2	WASH complex subunit 2A OS=Homo sapiens GN=WASHC2A PE=1 SV=3	0	0	48	47	451	16	1	1341	147.1	4.81	9761	544.99	46	29	29	1.81241e+08	1.65937e+08	1.89675e+08	2.22724e+08	2.27576e+08	2.36752e+08	2.51863e+08	2.66449e+08	2.64409e+08
High	High	Master Protein	Q96AE4	Far upstream element-binding protein 1 OS=Homo sapiens GN=FUBP1 PE=1 SV=3	0	0	64	37	803	31	1	644	67.5	7.61	20242	544.89	36	18	4	1.83222e+09	1.90543e+09	1.86687e+09	2.46148e+09	2.42002e+09	2.54899e+09	2.83673e+09	2.98815e+09	3.26362e+09	Acetyl [N-Term]
High	High	Master Protein	Q9Y2W1	Thyroid hormone receptor-associated protein 3 OS=Homo sapiens GN=THRAP3 PE=1 SV=2	0	0	44	44	780	42	1	955	108.6	10.15	20548	544.67	43	18	2	1.0551e+09	1.04156e+09	1.17246e+09	1.55951e+09	1.6541e+09	1.6134e+09	1.4882e+09	1.5354e+09	1.56329e+09
High	High	Master Protein	O95373	Importin-7 OS=Homo sapiens GN=IPO7 PE=1 SV=1	0	0	40	42	549	41	1	1038	119.4	4.82	12399	544.33	42	22	1	8.94701e+08	9.03679e+08	9.6448e+08	1.11754e+09	1.14272e+09	1.09234e+09	1.14327e+09	1.15461e+09	1.23566e+09	Acetyl [N-Term]
High	High	Master Protein	P51532	Transcription activator BRG1 OS=Homo sapiens GN=SMARCA4 PE=1 SV=2	0	0	32	53	604	31	1	1647	184.5	7.88	15214	543.6	53	22	22	4.87709e+08	4.76019e+08	4.93969e+08	5.59966e+08	5.68791e+08	6.01967e+08	6.18287e+08	6.39242e+08	6.47383e+08	Acetyl [N-Term]
High	High	Master Protein	Q96K76	Ubiquitin carboxyl-terminal hydrolase 47 OS=Homo sapiens GN=USP47 PE=1 SV=3	0	0	51	59	584	59	1	1375	157.2	5.08	14627	542.73	57	28	0	3.27498e+08	3.35684e+08	3.17153e+08	4.17739e+08	4.25586e+08	4.31662e+08	5.03055e+08	5.12025e+08	5.11482e+08
High	High	Master Protein	P10515	Dihydrolipoyllysine-residue acetyltransferase component of pyruvate dehydrogenase complex, mitochondrial OS=Homo sapiens GN=DLAT PE=1 SV=3	0	0	48	23	413	23	1	647	69	7.84	9460	541.76	23	13	0	4.92406e+08	487246390	5.43255e+08	6.20769e+08	6.81504e+08	6.53485e+08	7.25556e+08	7.99426e+08	7.58276e+08
High	High	Master Protein	Q12802	A-kinase anchor protein 13 OS=Homo sapiens GN=AKAP13 PE=1 SV=2	0	0	36	66	446	66	1	2813	307.4	5.24	10445	541.27	63	34	0	8.64122e+07	8.29332e+07	8.68182e+07	1.03116e+08	1.12118e+08	1.15984e+08	1.2401e+08	1.22433e+08	1.25226e+08
High	High	Master Protein	Q09028	Histone-binding protein RBBP4 OS=Homo sapiens GN=RBBP4 PE=1 SV=3	0	0	71	23	538	15	1	425	47.6	4.89	13328	540.83	22	13	9	2.07213e+09	2.01766e+09	2.05725e+09	2.44691e+09	2.33102e+09	2.419e+09	2.71109e+09	2.61266e+09	2.7851e+09
High	High	Master Protein	P50579	Methionine aminopeptidase 2 OS=Homo sapiens GN=METAP2 PE=1 SV=1	0	0	70	27	409	27	1	478	52.9	5.82	11193	540.41	27	18	0	1.08492e+08	1.05322e+08	9.85189e+07	2.44653e+08	2.21803e+08	2.29229e+08	3.26859e+08	3.54172e+08	3.44645e+08	Acetyl [N-Term]
High	High	Master Protein	Q99536	Synaptic vesicle membrane protein VAT-1 homolog OS=Homo sapiens GN=VAT1 PE=1 SV=2	0	0	65	22	441	22	1	393	41.9	6.29	11813	539.87	22	13	0	3.49033e+08	3.44344e+08	3.64116e+08	4.37871e+08	4.75299e+08	4.6341e+08	5.19864e+08	5.15025e+08	5.28598e+08	Acetyl [N-Term]
High	High	Master Protein	O14974	Protein phosphatase 1 regulatory subunit 12A OS=Homo sapiens GN=PPP1R12A PE=1 SV=1	0	0	48	51	557	49	1	1030	115.2	5.4	14103	539.46	50	22	2	4.67977e+08	4.47164e+08	4.51956e+08	6.16769e+08	6.05055e+08	6.03762e+08	7.80785e+08	8.12746e+08	7.97302e+08
High	High	Master Protein	P26368	Splicing factor U2AF 65 kDa subunit OS=Homo sapiens GN=U2AF2 PE=1 SV=4	0	0	51	17	424	17	1	475	53.5	9.09	8117	539.45	17	8	0	1.11252e+09	1.0509e+09	1.17008e+09	1.35094e+09	1.32696e+09	1.44729e+09	1.55336e+09	1.52268e+09	1.52816e+09	Acetyl [N-Term]
High	High	Master Protein	Q13347	Eukaryotic translation initiation factor 3 subunit I OS=Homo sapiens GN=EIF3I PE=1 SV=1	0	0	83	23	492	23	1	325	36.5	5.64	10860	538.83	22	13	0	1.46731e+09	1.47335e+09	1.5306e+09	2.00829e+09	1.98435e+09	1.95586e+09	1.84542e+09	1.9376e+09	1.91756e+09
High	High	Master Protein	P13797	Plastin-3 OS=Homo sapiens GN=PLS3 PE=1 SV=4	0	0	55	32	508	22	1	630	70.8	5.6	12284	538.08	32	19	2	4.47131e+08	4.32791e+08	4.4791e+08	4.94612e+08	5.19932e+08	5.29308e+08	5.58617e+08	5.90085e+08	5.82131e+08	Acetyl [N-Term]
High	High	Master Protein	Q15084	Protein disulfide-isomerase A6 OS=Homo sapiens GN=PDIA6 PE=1 SV=1	0	0	52	20	468	20	1	440	48.1	5.08	12271	537.61	20	12	0	1.84493e+09	1.8186e+09	1.79289e+09	2.0921e+09	2.22244e+09	2.17969e+09	2.3272e+09	2.34416e+09	2.37346e+09
High	High	Master Protein	O75122	CLIP-associating protein 2 OS=Homo sapiens GN=CLASP2 PE=1 SV=2	0	0	56	59	560	54	1	1294	141	8.47	12873	536.66	59	28	0	2.29024e+08	2.26501e+08	2.36491e+08	2.77421e+08	2.87592e+08	2.8227e+08	2.95836e+08	3.01131e+08	3.06446e+08
High	High	Master Protein	P08865	40S ribosomal protein SA OS=Homo sapiens GN=RPSA PE=1 SV=4	0	0	66	21	582	21	1	295	32.8	4.87	15214	536.42	21	13	0	5.02383e+09	5.0302e+09	4.83245e+09	6.30221e+09	5.95732e+09	6.161e+09	6.06774e+09	6.26388e+09	6.7281e+09	Acetyl [N-Term]
High	High	Master Protein	O95394	Phosphoacetylglucosamine mutase OS=Homo sapiens GN=PGM3 PE=1 SV=1	0	0	71	29	485	29	1	542	59.8	6.25	11437	534.89	28	16	0	7.86103e+08	7.65014e+08	8.13752e+08	1.01626e+09	9.8925e+08	9.91198e+08	9.48744e+08	1.02706e+09	1.03802e+09
High	High	Master Protein	P42858	Huntingtin OS=Homo sapiens GN=HTT PE=1 SV=2	0	0	25	61	463	61	1	3142	347.4	6.2	11011	534.59	60	29	0	1.43189e+08	1.43632e+08	1.46431e+08	1.47127e+08	1.64012e+08	1.61149e+08	1.7096e+08	2.0916e+08	2.08945e+08
High	High	Master Protein	Q9UHD1	Cysteine and histidine-rich domain-containing protein 1 OS=Homo sapiens GN=CHORDC1 PE=1 SV=2	0	0	73	24	516	24	1	332	37.5	7.87	10348	534.28	23	14	0	1.36543e+09	1.32155e+09	1.42388e+09	1.5903e+09	1.69532e+09	1.6224e+09	1.78176e+09	1.77342e+09	1.78373e+09	Acetyl [N-Term]
High	High	Master Protein	Q9NUU7	ATP-dependent RNA helicase DDX19A OS=Homo sapiens GN=DDX19A PE=1 SV=1	0	0	66	30	478	6	1	478	53.9	6.58	11419	534.16	29	14	24	6.54792e+08	6.29158e+08	7.08766e+08	8.01477e+08	8.70557e+08	8.63452e+08	9.3393e+08	9.37949e+08	9.29856e+08	Acetyl [N-Term]
High	High	Master Protein	P22087	rRNA 2'-O-methyltransferase fibrillarin OS=Homo sapiens GN=FBL PE=1 SV=2	0	0	65	28	570	23	1	321	33.8	10.18	13738	534.14	28	15	5	1.08303e+09	1.16601e+09	1.16764e+09	1.34418e+09	1.5421e+09	1.41534e+09	1.61493e+09	1.63284e+09	1.71009e+09
High	High	Master Protein	Q9UNE7	E3 ubiquitin-protein ligase CHIP OS=Homo sapiens GN=STUB1 PE=1 SV=2	0	0	79	34	473	34	1	303	34.8	5.87	10592	533.05	33	14	0	8.3906e+08	7.16355e+08	8.04804e+08	9.35809e+08	9.62012e+08	1.00568e+09	1.105e+09	1.14257e+09	1.19043e+09
High	High	Master Protein	Q9HCE1	Putative helicase MOV-10 OS=Homo sapiens GN=MOV10 PE=1 SV=2	0	0	55	48	531	48	1	1003	113.6	8.82	12011	531.07	47	20	0	3.99822e+08	3.99644e+08	4.14206e+08	5.25435e+08	5.74934e+08	5.68145e+08	5.77022e+08	6.03365e+08	6.25186e+08
High	High	Master Protein	O14617	AP-3 complex subunit delta-1 OS=Homo sapiens GN=AP3D1 PE=1 SV=1	0	0	44	41	457	41	1	1153	130.1	8.48	11539	530.98	41	21	0	4.12777e+08	4.07618e+08	4.0705e+08	5.08647e+08	5.13261e+08	5.31721e+08	5.35372e+08	5.32576e+08	5.46529e+08
High	High	Master Protein	Q13618	Cullin-3 OS=Homo sapiens GN=CUL3 PE=1 SV=2	0	0	51	40	453	39	1	768	88.9	8.48	11084	530.43	39	20	0	3.69453e+08	365269602	3.82986e+08	4.68235e+08	4.84382e+08	4.867e+08	5.14537e+08	5.30933e+08	5.40434e+08
High	High	Master Protein	O43747	AP-1 complex subunit gamma-1 OS=Homo sapiens GN=AP1G1 PE=1 SV=5	0	0	48	37	530	35	1	822	91.3	6.8	13453	530.12	37	14	2	8.30154e+08	7.47709e+08	7.74519e+08	9.39841e+08	9.88704e+08	1.00801e+09	8.82693e+08	9.54259e+08	9.21715e+08
High	High	Master Protein	P60891	Ribose-phosphate pyrophosphokinase 1 OS=Homo sapiens GN=PRPS1 PE=1 SV=2	0	0	61	19	480	8	1	318	34.8	6.98	11637	529.53	19	9	13	1.13145e+09	1.1374e+09	1.20283e+09	1.31938e+09	1.34077e+09	1.49094e+09	1.25171e+09	1.41493e+09	1.42947e+09
High	High	Master Protein	P05387	60S acidic ribosomal protein P2 OS=Homo sapiens GN=RPLP2 PE=1 SV=1	0	0	79	9	360	9	1	115	11.7	4.54	9462	528.92	9	6	0	4.38294e+09	4222222000	4.74347e+09	5.62656e+09	5.42394e+09	5.73301e+09	5.91591e+09	5.85558e+09	5.75099e+09	Acetyl [N-Term]
High	High	Master Protein	Q7Z3K3	Pogo transposable element with ZNF domain OS=Homo sapiens GN=POGZ PE=1 SV=2	0	0	41	40	416	40	1	1410	155.2	7.4	8749	528.46	39	20	0	1.56178e+08	1.57788e+08	1.58122e+08	1.63687e+08	1.65533e+08	1.728e+08	2.10651e+08	2.16275e+08	2.31234e+08	Acetyl [N-Term]
High	High	Master Protein	Q9Y4E8	Ubiquitin carboxyl-terminal hydrolase 15 OS=Homo sapiens GN=USP15 PE=1 SV=3	0	0	62	53	580	51	1	981	112.3	5.22	13535	527.94	51	22	2	5.13651e+08	5.24651e+08	5.33649e+08	6.32546e+08	6.5188e+08	6.54375e+08	7.98994e+08	7.60773e+08	7.87238e+08	Acetyl [N-Term]
High	High	Master Protein	P15559	NAD(P)H dehydrogenase [quinone] 1 OS=Homo sapiens GN=NQO1 PE=1 SV=1	0	0	49	17	409	17	1	274	30.8	8.88	8729	527.42	17	10	0	7.81944e+08	8.14876e+08	8.03191e+08	1.22844e+09	1.2499e+09	1.34387e+09	1.49968e+09	1.33633e+09	1.38221e+09
High	High	Master Protein	P33992	DNA replication licensing factor MCM5 OS=Homo sapiens GN=MCM5 PE=1 SV=5	0	0	64	50	664	50	1	734	82.2	8.37	15518	526.96	49	23	0	1.28451e+09	1.31772e+09	1.39342e+09	1.528e+09	1.65684e+09	1.63913e+09	1.44749e+09	1.52548e+09	1.529e+09	Acetyl [N-Term]
High	High	Master Protein	P35527	Keratin, type I cytoskeletal 9 OS=Homo sapiens GN=KRT9 PE=1 SV=3	0	0	56	26	407	25	1	623	62	5.24	11095	526.84	26	12	0	2.68227e+08	2.5642e+08	2.7399e+08	6.56439e+08	6.09835e+08	6.03299e+08	3.73382e+08	4.01623e+08	3.71452e+08
High	High	Master Protein	Q9P265	Disco-interacting protein 2 homolog B OS=Homo sapiens GN=DIP2B PE=1 SV=3	0	0	46	53	418	49	1	1576	171.4	8.09	9107	526.76	52	31	4	1.73079e+08	1.72309e+08	1.81378e+08	2.41632e+08	2.5548e+08	2.6412e+08	2.61984e+08	2.93513e+08	2.80208e+08
High	High	Master Protein	P46063	ATP-dependent DNA helicase Q1 OS=Homo sapiens GN=RECQL PE=1 SV=3	0	0	62	35	527	34	1	649	73.4	7.88	11873	526.55	34	19	1	5.47668e+08	5.46685e+08	5.66e+08	7.05522e+08	7.02855e+08	6.97112e+08	7.47609e+08	7.27434e+08	7.42346e+08
High	High	Master Protein	Q9UBC2	Epidermal growth factor receptor substrate 15-like 1 OS=Homo sapiens GN=EPS15L1 PE=1 SV=1	0	0	72	44	516	44	1	864	94.2	5.11	12172	526.31	43	21	0	5.48247e+08	4.96551e+08	5.11494e+08	5.88923e+08	6.76525e+08	6.05388e+08	7.12135e+08	7.29922e+08	7.35607e+08	Acetyl [N-Term]
High	High	Master Protein	Q8NFC6	Biorientation of chromosomes in cell division protein 1-like 1 OS=Homo sapiens GN=BOD1L1 PE=1 SV=2	0	0	35	86	625	83	1	3051	330.3	5.08	17566	526.16	85	37	3	1.46622e+08	1.37899e+08	1.5532e+08	1.96885e+08	2.01854e+08	2.08001e+08	2.19858e+08	2.31828e+08	2.46377e+08
High	High	Master Protein	Q8IX12	Cell division cycle and apoptosis regulator protein 1 OS=Homo sapiens GN=CCAR1 PE=1 SV=2	0	0	41	49	646	47	1	1150	132.7	5.76	13725	525.86	48	23	2	7.52741e+08	8.06303e+08	7.84609e+08	946938204	1.01675e+09	1.04591e+09	1.07396e+09	1.10472e+09	1095822947
High	High	Master Protein	Q68E01	Integrator complex subunit 3 OS=Homo sapiens GN=INTS3 PE=1 SV=1	0	0	46	37	435	37	1	1043	118	5.8	10987	525.2	37	19	0	2.65563e+08	2.58893e+08	2.75758e+08	3.22075e+08	3.28931e+08	3.21019e+08	3.10792e+08	3.13815e+08	3.13235e+08
High	High	Master Protein	Q5T1M5	FK506-binding protein 15 OS=Homo sapiens GN=FKBP15 PE=1 SV=2	0	0	42	43	404	43	1	1219	133.5	5.2	9748	524.48	38	31	0	1.83534e+08	1.70178e+08	1.84454e+08	2.185e+08	2.25861e+08	2.2174e+08	2.30353e+08	2.59586e+08	2.50413e+08	Acetyl [N-Term]
High	High	Master Protein	P12109	Collagen alpha-1(VI) chain OS=Homo sapiens GN=COL6A1 PE=1 SV=3	0	0	57	42	439	42	1	1028	108.5	5.43	10716	523.7	41	20	0	1.07652e+08	1.02065e+08	1.00986e+08	1.45376e+08	1.45303e+08	1.50347e+08	199453793	2.0422e+08	2.03858e+08
High	High	Master Protein	P42345	Serine/threonine-protein kinase mTOR OS=Homo sapiens GN=MTOR PE=1 SV=1	0	0	41	72	487	72	1	2549	288.7	7.17	10931	522.81	72	37	0	1.79825e+08	1.78149e+08	1.85393e+08	2.28648e+08	2.34437e+08	2.36992e+08	2.59947e+08	2.64569e+08	2.63489e+08	Acetyl [N-Term]
High	High	Master Protein	P52907	F-actin-capping protein subunit alpha-1 OS=Homo sapiens GN=CAPZA1 PE=1 SV=3	0	0	76	15	561	12	1	286	32.9	5.69	13535	522.51	14	10	3	1.06003e+09	1.06639e+09	1.06599e+09	1.35816e+09	1.40609e+09	1.45728e+09	1.63616e+09	1.66934e+09	1.67149e+09	Acetyl [N-Term]
High	High	Master Protein	P13804	Electron transfer flavoprotein subunit alpha, mitochondrial OS=Homo sapiens GN=ETFA PE=1 SV=1	0	0	61	15	492	15	1	333	35.1	8.38	12508	522.15	15	10	0	1.59118e+09	1.5116e+09	1.5143e+09	1.9629e+09	2.02807e+09	2.08491e+09	2.4739e+09	2.68156e+09	2.6376e+09
High	High	Master Protein	O95202	LETM1 and EF-hand domain-containing protein 1, mitochondrial OS=Homo sapiens GN=LETM1 PE=1 SV=1	0	0	50	34	414	33	1	739	83.3	6.7	8476	521.67	33	22	0	3.50355e+08	3.17508e+08	3.43191e+08	3.54813e+08	3.99861e+08	3.98037e+08	5.20604e+08	5.39543e+08	5.56107e+08
High	High	Master Protein	Q13620	Cullin-4B OS=Homo sapiens GN=CUL4B PE=1 SV=4	0	0	58	52	709	38	1	913	103.9	7.37	18961	521.03	52	24	14	1.23013e+09	1.1768e+09	1.2479e+09	1.54059e+09	1.54301e+09	1.54752e+09	1.64764e+09	1.81789e+09	1.85477e+09
High	High	Master Protein	P25787	Proteasome subunit alpha type-2 OS=Homo sapiens GN=PSMA2 PE=1 SV=2	0	0	70	12	367	12	1	234	25.9	7.43	8213	520.96	11	10	0	5.16151e+08	5.10985e+08	5.70885e+08	6.96296e+08	7.61318e+08	663659319	7.35033e+08	7.99613e+08	7.4955e+08
High	High	Master Protein	Q7Z417	Nuclear fragile X mental retardation-interacting protein 2 OS=Homo sapiens GN=NUFIP2 PE=1 SV=1	0	0	54	27	415	27	1	695	76.1	8.7	9927	520.74	27	19	0	3.26758e+08	3.19197e+08	3.43861e+08	4.12287e+08	4.26779e+08	4.22843e+08	4.88959e+08	5.11932e+08	503025031
High	High	Master Protein	P34913	Bifunctional epoxide hydrolase 2 OS=Homo sapiens GN=EPHX2 PE=1 SV=2	0	0	58	26	359	26	1	555	62.6	6.28	7392	520.42	25	15	0	2.88619e+08	3.09904e+08	2.80514e+08	3.83352e+08	3.66446e+08	3.93554e+08	3.35529e+08	3.45956e+08	3.51061e+08
High	High	Master Protein	P18085	ADP-ribosylation factor 4 OS=Homo sapiens GN=ARF4 PE=1 SV=3	0	0	63	10	497	5	1	180	20.5	7.14	11408	519.86	10	6	0	7.6733e+08	7.87805e+08	7.49861e+08	8.38724e+08	7.13727e+08	7.96322e+08	8.80406e+08	9.20664e+08	8.56434e+08
High	High	Master Protein	Q9BXJ9	N-alpha-acetyltransferase 15, NatA auxiliary subunit OS=Homo sapiens GN=NAA15 PE=1 SV=1	0	0	53	50	653	41	1	866	101.2	7.42	15206	519.18	49	19	12	1.03953e+09	1.00758e+09	1.02333e+09	1.22364e+09	1.2974e+09	1.27093e+09	1.36527e+09	1.41884e+09	1.40388e+09
High	High	Master Protein	Q9HAV4	Exportin-5 OS=Homo sapiens GN=XPO5 PE=1 SV=1	0	0	43	43	512	43	1	1204	136.2	5.8	10933	517.75	43	24	0	5.04858e+08	4.93092e+08	4.91916e+08	6.09628e+08	6.0665e+08	6.31232e+08	6.35232e+08	6.32629e+08	6.42578e+08	Acetyl [N-Term]
High	High	None	Q58FF7	Putative heat shock protein HSP 90-beta-3 OS=Homo sapiens GN=HSP90AB3P PE=5 SV=1	0	0	25	24	1095	14	1	597	68.3	4.79	24487	516.54	23	14	0	1.7997e+10	1.80936e+10	1.60912e+10	2.00413e+10	1.9854e+10	2.14826e+10	1.97944e+10	2.17844e+10	2.01729e+10
High	High	Master Protein	Q15154	Pericentriolar material 1 protein OS=Homo sapiens GN=PCM1 PE=1 SV=4	0	0	43	73	609	71	1	2024	228.4	5.02	15011	516.18	72	34	1	2.60725e+08	2.56609e+08	2.68435e+08	2.80577e+08	2.84096e+08	2.95317e+08	3.49009e+08	3.73032e+08	3.94979e+08
High	High	Master Protein	P58546	Myotrophin OS=Homo sapiens GN=MTPN PE=1 SV=2	0	0	74	7	300	7	1	118	12.9	5.52	5453	516.13	7	4	0	8.0681e+08	8.64032e+08	8.95091e+08	1.04094e+09	1.06128e+09	1.20932e+09	1.25172e+09	1.29768e+09	1.32816e+09
High	High	Master Protein	O75150	E3 ubiquitin-protein ligase BRE1B OS=Homo sapiens GN=RNF40 PE=1 SV=4	0	0	48	50	508	43	1	1001	113.6	6.23	11433	516.01	50	31	7	3.76663e+08	3.69829e+08	3.71055e+08	4.28254e+08	4.46546e+08	4.40842e+08	4.99133e+08	5.3057e+08	5.44574e+08
High	High	Master Protein	Q9P2R3	Rabankyrin-5 OS=Homo sapiens GN=ANKFY1 PE=1 SV=2	0	0	45	37	429	36	1	1169	128.3	6.1	9507	515.55	36	24	0	2.1189e+08	2.03475e+08	2.1118e+08	2.75902e+08	3.03175e+08	2.94107e+08	2.60381e+08	2.70314e+08	2.75327e+08
High	High	Master Protein	Q6P2E9	Enhancer of mRNA-decapping protein 4 OS=Homo sapiens GN=EDC4 PE=1 SV=1	0	0	53	45	502	45	1	1401	151.6	5.86	13141	514.7	45	24	0	4.02865e+08	3.62821e+08	4.11594e+08	4.36148e+08	4.71474e+08	4.88843e+08	5.04738e+08	5.00714e+08	4.8145e+08	Acetyl [N-Term]
High	High	Master Protein	P46782	40S ribosomal protein S5 OS=Homo sapiens GN=RPS5 PE=1 SV=4	0	0	58	15	451	15	1	204	22.9	9.72	11162	514.59	15	6	0	2.14203e+09	1.89346e+09	1.97936e+09	3.03515e+09	2.98842e+09	2.99409e+09	2.81029e+09	2.76974e+09	2.90324e+09	Acetyl [N-Term; N-Term]
High	High	Master Protein	Q99615	DnaJ homolog subfamily C member 7 OS=Homo sapiens GN=DNAJC7 PE=1 SV=2	0	0	73	44	616	44	1	494	56.4	6.96	13258	514.53	44	17	0	9.75784e+08	1.00229e+09	1.04267e+09	1.1275e+09	1.14307e+09	1.12096e+09	1.30872e+09	1.3511e+09	1.33373e+09	Acetyl [N-Term]
High	High	Master Protein	P42566	Epidermal growth factor receptor substrate 15 OS=Homo sapiens GN=EPS15 PE=1 SV=2	0	0	65	44	475	44	1	896	98.6	4.64	10589	514.45	44	24	0	2.49774e+08	2.36291e+08	2.62647e+08	3.24623e+08	3.2525e+08	3.19362e+08	3.76673e+08	3.79509e+08	3.5142e+08	Acetyl [N-Term]
High	High	Master Protein	Q8WWM7	Ataxin-2-like protein OS=Homo sapiens GN=ATXN2L PE=1 SV=2	0	0	49	42	516	41	1	1075	113.3	8.59	12625	514.21	42	18	1	5.96332e+08	6.42123e+08	6.4088e+08	8.38821e+08	8.50689e+08	9.09579e+08	9.67592e+08	1.01015e+09	1.04163e+09	Acetyl [N-Term]
High	High	None	Q3ZCM7	Tubulin beta-8 chain OS=Homo sapiens GN=TUBB8 PE=1 SV=2	0	0	24	10	1623	0	1	444	49.7	4.89	48818	513.99	10	7	0	1.55487e+10	1.49889e+10	1.56062e+10	1.98759e+10	1.78274e+10	1.84448e+10	1.92922e+10	1.88909e+10	1.88139e+10
High	High	Master Protein	Q12792	Twinfilin-1 OS=Homo sapiens GN=TWF1 PE=1 SV=3	0	0	60	20	411	17	1	350	40.3	6.96	9593	513.86	20	8	4	4.42501e+08	4.21422e+08	4.27101e+08	5.44009e+08	5.24996e+08	5.67431e+08	6.02678e+08	6.13604e+08	6.34272e+08	Acetyl [N-Term]
High	High	Master Protein	P31942	Heterogeneous nuclear ribonucleoprotein H3 OS=Homo sapiens GN=HNRNPH3 PE=1 SV=2	0	0	69	17	412	15	1	346	36.9	6.87	10044	513.31	15	13	0	3.36779e+08	3.10001e+08	3.40873e+08	4.47413e+08	4.3535e+08	4.55214e+08	4.88414e+08	4.85553e+08	4.68886e+08
High	High	Master Protein	Q13838	Spliceosome RNA helicase DDX39B OS=Homo sapiens GN=DDX39B PE=1 SV=1	0	0	62	27	739	11	1	428	49	5.67	18205	512.32	27	11	0	1.11404e+09	9.98692e+08	9.47519e+08	1.27121e+09	1.34887e+09	1.23409e+09	1.58026e+09	1.50584e+09	1.56339e+09	Acetyl [N-Term]
High	High	Master Protein	Q9UBF2	Coatomer subunit gamma-2 OS=Homo sapiens GN=COPG2 PE=1 SV=1	0	0	64	42	542	37	1	871	97.6	5.81	13607	512.11	42	22	0	3.36539e+08	3.25411e+08	3.25657e+08	4.17666e+08	4.47215e+08	4.46755e+08	4.5591e+08	4.84142e+08	463351103
High	High	Master Protein	Q9Y5L0	Transportin-3 OS=Homo sapiens GN=TNPO3 PE=1 SV=3	0	0	38	26	428	26	1	923	104.1	5.57	8765	511.67	26	17	0	3.01616e+08	3.19211e+08	3.1587e+08	3.15269e+08	3.45563e+08	3.3809e+08	3.41887e+08	3.54655e+08	3.42626e+08
High	High	Master Protein	Q9H6Z4	Ran-binding protein 3 OS=Homo sapiens GN=RANBP3 PE=1 SV=1	0	0	52	26	461	26	1	567	60.2	4.78	12679	511.17	26	14	0	4.38665e+08	4.62423e+08	4.90297e+08	5.55518e+08	6.07645e+08	6.1489e+08	5.94694e+08	5.99642e+08	6.18193e+08	Acetyl [N-Term]
High	High	Master Protein	O95573	Long-chain-fatty-acid--CoA ligase 3 OS=Homo sapiens GN=ACSL3 PE=1 SV=3	0	0	59	35	479	32	1	720	80.4	8.38	10387	509.77	35	20	3	4.86119e+08	4.75464e+08	5.03026e+08	4.93647e+08	4.85161e+08	5.05329e+08	5.68191e+08	5.48338e+08	5.57507e+08	Acetyl [N-Term]
High	High	Master Protein	O75955	Flotillin-1 OS=Homo sapiens GN=FLOT1 PE=1 SV=3	0	0	75	30	446	30	1	427	47.3	7.49	10744	509.62	29	17	0	2.29421e+08	2.46714e+08	2.69538e+08	2.95552e+08	3.14641e+08	3.06687e+08	3.58051e+08	3.50191e+08	3.79813e+08
High	High	None	Q9H853	Putative tubulin-like protein alpha-4B OS=Homo sapiens GN=TUBA4B PE=5 SV=2	0	0	14	3	687	0	2	241	27.5	7.83	19286	509.45	3	2	0	1.31734e+09	1.37482e+09	1.26305e+09	2.03044e+09	2.24037e+09	1.99713e+09	2.28317e+09	2.43461e+09	2.30938e+09
High	High	Master Protein	Q5VT52	Regulation of nuclear pre-mRNA domain-containing protein 2 OS=Homo sapiens GN=RPRD2 PE=1 SV=1	0	0	56	49	446	49	1	1461	155.9	7.42	10227	508.75	49	26	0	2.2282e+08	2.21126e+08	2.25887e+08	2.71646e+08	2.72788e+08	2.89703e+08	2.58022e+08	2.76134e+08	2.73016e+08
High	High	Master Protein	P15170	Eukaryotic peptide chain release factor GTP-binding subunit ERF3A OS=Homo sapiens GN=GSPT1 PE=1 SV=1	0	0	58	27	580	12	1	499	55.7	5.62	12495	508.69	26	14	18	1.56625e+09	1.4446e+09	1.4698e+09	1.94352e+09	1.9939e+09	2.0298e+09	2.05766e+09	2.15993e+09	2.18698e+09
High	High	Master Protein	Q04726	Transducin-like enhancer protein 3 OS=Homo sapiens GN=TLE3 PE=1 SV=2	0	0	51	29	407	23	1	772	83.4	7.2	9898	508.51	28	18	6	2.91811e+08	2.83786e+08	2.83723e+08	3.85434e+08	3.68835e+08	3.54936e+08	3.83726e+08	3.82526e+08	4.03295e+08
High	High	Master Protein	Q05655	Protein kinase C delta type OS=Homo sapiens GN=PRKCD PE=1 SV=2	0	0	62	36	471	35	1	676	77.5	7.75	10884	507.96	36	19	1	3.81711e+08	3.65749e+08	3.70729e+08	4.93445e+08	4.92372e+08	5.00997e+08	5.90586e+08	5.8324e+08	6.05451e+08
High	High	Master Protein	P40855	Peroxisomal biogenesis factor 19 OS=Homo sapiens GN=PEX19 PE=1 SV=1	0	0	53	15	364	15	1	299	32.8	4.34	9258	507.91	15	8	0	1.64802e+08	1.69319e+08	1.83267e+08	2.27669e+08	2.57243e+08	2.46328e+08	2.81371e+08	2.61546e+08	2.82249e+08
High	High	Master Protein	Q13501	Sequestosome-1 OS=Homo sapiens GN=SQSTM1 PE=1 SV=1	0	0	66	20	372	20	1	440	47.7	5.22	8968	507.74	20	14	0	4.72547e+08	4.52846e+08	4.7474e+08	4.48845e+08	4.57809e+08	4.76126e+08	5.25858e+08	5.45199e+08	6.01473e+08
High	High	Master Protein	Q9NRR5	Ubiquilin-4 OS=Homo sapiens GN=UBQLN4 PE=1 SV=2	0	0	46	19	400	14	1	601	63.8	5.22	9312	506.88	18	13	3	3.1825e+08	344922619	3.50576e+08	413371836	4.15617e+08	4.65715e+08	3.9704e+08	4.22925e+08	4.35471e+08	Acetyl [N-Term]
High	High	Master Protein	P29144	Tripeptidyl-peptidase 2 OS=Homo sapiens GN=TPP2 PE=1 SV=4	0	0	59	58	530	58	1	1249	138.3	6.32	11504	506.69	56	23	0	5.24251e+08	519490731	5.49981e+08	5.80256e+08	6.27776e+08	6.33138e+08	6.93071e+08	7.42054e+08	724179307	Acetyl [N-Term]
High	High	Master Protein	Q9H2K8	Serine/threonine-protein kinase TAO3 OS=Homo sapiens GN=TAOK3 PE=1 SV=2	0	0	47	43	495	37	1	898	105.3	7.3	11896	506.45	43	16	7	5.07188e+08	5.02858e+08	5.12158e+08	6.26099e+08	6.22239e+08	6.34632e+08	6.55184e+08	7.22279e+08	7.28047e+08
High	High	Master Protein	Q14938	Nuclear factor 1 X-type OS=Homo sapiens GN=NFIX PE=1 SV=2	0	0	66	23	361	19	1	502	55.1	8.68	7811	506.29	22	16	4	3.71315e+08	3.72718e+08	394266130	4.44858e+08	4.54276e+08	4.51749e+08	4.8161e+08	4.77574e+08	4.94043e+08	Acetyl [N-Term]
High	High	Master Protein	O75390	Citrate synthase, mitochondrial OS=Homo sapiens GN=CS PE=1 SV=2	0	0	51	21	528	21	1	466	51.7	8.32	12578	505.27	21	9	0	1.86207e+09	1.76884e+09	1.91908e+09	2.23269e+09	2.27445e+09	2.08205e+09	2.98348e+09	2.92296e+09	3.06169e+09
High	High	Master Protein	P13645	Keratin, type I cytoskeletal 10 OS=Homo sapiens GN=KRT10 PE=1 SV=6	0	0	58	30	476	25	1	584	58.8	5.21	12320	504.46	30	15	6	4.39983e+08	4.30902e+08	4.81392e+08	8.01037e+08	8.39581e+08	8.52217e+08	8.76191e+08	8.55698e+08	9.06825e+08
High	High	Master Protein	P49006	MARCKS-related protein OS=Homo sapiens GN=MARCKSL1 PE=1 SV=2	0	0	78	7	420	6	1	195	19.5	4.67	10398	503.8	7	5	0	7.85371e+08	7.14363e+08	8.8111e+08	9.88315e+08	9.3057e+08	1.10198e+09	1.00571e+09	1.14922e+09	1.22998e+09
High	High	Master Protein	Q9Y266	Nuclear migration protein nudC OS=Homo sapiens GN=NUDC PE=1 SV=1	0	0	72	33	649	33	1	331	38.2	5.38	15686	503.45	33	16	0	2.1956e+09	2.10423e+09	2.16812e+09	2.27028e+09	2.40307e+09	2.40463e+09	2.75254e+09	2.95665e+09	2.8311e+09
High	High	Master Protein	Q9UJZ1	Stomatin-like protein 2, mitochondrial OS=Homo sapiens GN=STOML2 PE=1 SV=1	0	0	56	15	373	15	1	356	38.5	7.39	8912	502.06	15	13	0	3.41547e+08	3.3128e+08	3.38968e+08	4.66511e+08	4.13069e+08	4.26484e+08	5.53744e+08	5.51428e+08	537835626
High	High	Master Protein	P10155	60 kDa SS-A/Ro ribonucleoprotein OS=Homo sapiens GN=TROVE2 PE=1 SV=2	0	0	61	29	500	29	1	538	60.6	8.03	10417	501.22	28	15	0	7.43109e+08	7.43723e+08	7.60436e+08	1.002e+09	1.00491e+09	1.01406e+09	1.01203e+09	1.01033e+09	1.06791e+09	Acetyl [N-Term]
High	High	Master Protein	P23193	Transcription elongation factor A protein 1 OS=Homo sapiens GN=TCEA1 PE=1 SV=2	0	0	66	21	457	19	1	301	33.9	8.38	11308	500.39	21	12	2	6.1039e+08	5.70263e+08	6.31529e+08	7.20324e+08	8.01321e+08	7.32274e+08	6.33274e+08	6.86779e+08	6.96127e+08	Acetyl [N-Term]
High	High	Master Protein Candidate	P68133	Actin, alpha skeletal muscle OS=Homo sapiens GN=ACTA1 PE=1 SV=1	0	0	47	16	1294	3	1	377	42	5.39	31457	499.52	16	6	0	4.32173e+09	4.23283e+09	4.58612e+09	4.85614e+09	4.36564e+09	4.61479e+09	4.97942e+09	4.67861e+09	3.00868e+09
High	High	Master Protein	P68032	Actin, alpha cardiac muscle 1 OS=Homo sapiens GN=ACTC1 PE=1 SV=1	0	0	47	16	1294	3	1	377	42	5.39	31457	499.52	16	6	0	4.32173e+09	4.23283e+09	4.58612e+09	4.85614e+09	4.36564e+09	4.61479e+09	4.97942e+09	4.67861e+09	3.00868e+09
High	High	None	P62736	Actin, aortic smooth muscle OS=Homo sapiens GN=ACTA2 PE=1 SV=1	0	0	45	15	920	3	1	377	42	5.39	22698	499.52	15	6	0	4.32173e+09	4.23283e+09	4.58612e+09	4.85614e+09	4.36564e+09	4.61479e+09	4.97942e+09	4.67861e+09	3.00868e+09
High	High	None	P63267	Actin, gamma-enteric smooth muscle OS=Homo sapiens GN=ACTG2 PE=1 SV=1	0	0	45	15	920	3	1	376	41.9	5.48	22698	499.52	15	6	0	4.32173e+09	4.23283e+09	4.58612e+09	4.85614e+09	4.36564e+09	4.61479e+09	4.97942e+09	4.67861e+09	3.00868e+09
High	High	Master Protein	Q9Y383	Putative RNA-binding protein Luc7-like 2 OS=Homo sapiens GN=LUC7L2 PE=1 SV=2	0	0	47	25	540	16	1	392	46.5	10.01	13301	499.42	25	9	11	1.15708e+09	1.12047e+09	1.21875e+09	1.47234e+09	1.58685e+09	1.61132e+09	1.5386e+09	1.52573e+09	1.47082e+09	Acetyl [N-Term]
High	High	Master Protein	P30084	Enoyl-CoA hydratase, mitochondrial OS=Homo sapiens GN=ECHS1 PE=1 SV=4	0	0	62	14	430	14	1	290	31.4	8.07	9918	499.38	14	10	0	1.02667e+09	1.0954e+09	1085044985	1.31948e+09	1.53849e+09	1.57e+09	2.00527e+09	1.92983e+09	2.03601e+09
High	High	Master Protein	P46379	Large proline-rich protein BAG6 OS=Homo sapiens GN=BAG6 PE=1 SV=2	0	0	46	39	526	39	1	1132	119.3	5.6	13238	499.29	39	20	0	5.30734e+08	5.37316e+08	5.50384e+08	7.55445e+08	7.7772e+08	7.97388e+08	7.87491e+08	7.88605e+08	8.07348e+08	Acetyl [N-Term]
High	High	Master Protein	Q13033	Striatin-3 OS=Homo sapiens GN=STRN3 PE=1 SV=3	0	0	37	21	331	18	1	797	87.2	5.36	7624	499.02	21	15	2	1.61277e+08	1.57835e+08	1.51685e+08	1.9466e+08	2.38613e+08	2.19098e+08	2.18235e+08	2.22504e+08	2.2025e+08	Acetyl [N-Term]
High	High	Master Protein	P13861	cAMP-dependent protein kinase type II-alpha regulatory subunit OS=Homo sapiens GN=PRKAR2A PE=1 SV=2	0	0	58	21	454	18	1	404	45.5	5.07	10773	498.87	20	14	4	5.03996e+08	4.78517e+08	5.14869e+08	597550633	6.4182e+08	6.1215e+08	8.73373e+08	8.82276e+08	8.64691e+08
High	High	Master Protein	Q13283	Ras GTPase-activating protein-binding protein 1 OS=Homo sapiens GN=G3BP1 PE=1 SV=1	0	0	56	22	519	20	1	466	52.1	5.52	11722	498.1	22	15	0	1.00287e+09	9.98501e+08	1.03821e+09	1.34529e+09	1.30169e+09	1.28279e+09	1.49923e+09	1.5649e+09	1.50256e+09
High	High	Master Protein	O43852	Calumenin OS=Homo sapiens GN=CALU PE=1 SV=2	0	0	71	22	448	22	1	315	37.1	4.64	9940	497.74	22	13	0	9.01923e+08	8.48191e+08	8.83347e+08	8.97324e+08	9.50007e+08	9.40794e+08	1.08866e+09	1.1697e+09	1.2023e+09
High	High	Master Protein	Q9NXV6	CDKN2A-interacting protein OS=Homo sapiens GN=CDKN2AIP PE=1 SV=3	0	0	66	30	467	30	1	580	61.1	9.01	16541	497.08	30	14	0	1.887e+08	1.83486e+08	1.91817e+08	2.35141e+08	2.52971e+08	2.52155e+08	2.72318e+08	2.81816e+08	2.72595e+08	Acetyl [N-Term]
High	High	Master Protein	P51114	Fragile X mental retardation syndrome-related protein 1 OS=Homo sapiens GN=FXR1 PE=1 SV=3	0	0	53	33	438	30	1	621	69.7	6.15	11060	497.05	33	16	0	4.42142e+08	4.69181e+08	4.59252e+08	5.3858e+08	5.23922e+08	5.35831e+08	5.70896e+08	5.81388e+08	5.60429e+08
High	High	Master Protein	Q9UMR2	ATP-dependent RNA helicase DDX19B OS=Homo sapiens GN=DDX19B PE=1 SV=1	0	0	67	29	433	5	1	479	53.9	6.3	10333	496.93	28	15	0	1.05686e+07	1.34001e+07	1.27991e+07	2.21241e+07	1.839e+07	21922238	2.15852e+07	1.89622e+07	2.03619e+07	Acetyl [N-Term]
High	High	Master Protein	Q9BSJ8	Extended synaptotagmin-1 OS=Homo sapiens GN=ESYT1 PE=1 SV=1	0	0	48	39	425	39	1	1104	122.8	5.83	9646	496.82	39	20	0	3.96274e+08	3.8489e+08	4.18539e+08	4.75397e+08	4.70856e+08	4.88855e+08	5.96048e+08	6.15716e+08	6.21032e+08
High	High	Master Protein	O00193	Small acidic protein OS=Homo sapiens GN=SMAP PE=1 SV=1	0	0	27	7	378	7	1	183	20.3	4.72	9723	496.73	7	6	0	1.23438e+08	1.41932e+08	1.51682e+08	1.74973e+08	1.94679e+08	1.92975e+08	1.71005e+08	1.7515e+08	1.86209e+08
High	High	Master Protein	Q02978	Mitochondrial 2-oxoglutarate/malate carrier protein OS=Homo sapiens GN=SLC25A11 PE=1 SV=3	0	0	62	19	511	19	1	314	34	9.91	14499	496.62	19	5	0	8.14307e+08	8.22359e+08	8.63401e+08	9.30308e+08	1121457946	1.07205e+09	1.28472e+09	1.24785e+09	1.26644e+09	Acetyl [N-Term]
High	High	Master Protein	Q7Z460	CLIP-associating protein 1 OS=Homo sapiens GN=CLASP1 PE=1 SV=1	0	0	48	62	543	57	1	1538	169.3	9.03	13505	496.43	62	28	5	3.82535e+08	3.49568e+08	4.20211e+08	3.97264e+08	3.9415e+08	5.08275e+08	4.12435e+08	4.0547e+08	3.96193e+08
High	High	Master Protein	P15880	40S ribosomal protein S2 OS=Homo sapiens GN=RPS2 PE=1 SV=2	0	0	56	14	520	14	1	293	31.3	10.24	13478	496.02	14	6	0	2.1796e+09	2.16216e+09	1.93112e+09	2.73489e+09	2.59966e+09	2.91183e+09	2.53834e+09	3.15377e+09	2.8759e+09	Acetyl [N-Term]
High	High	Master Protein	P62917	60S ribosomal protein L8 OS=Homo sapiens GN=RPL8 PE=1 SV=2	0	0	54	20	440	20	1	257	28	11.03	8629	494.95	20	10	0	2.23238e+09	2.04445e+09	2.21452e+09	3.10435e+09	3.2099e+09	3.18167e+09	3.49858e+09	3.48056e+09	3.901e+09
High	High	Master Protein	Q9HCK8	Chromodomain-helicase-DNA-binding protein 8 OS=Homo sapiens GN=CHD8 PE=1 SV=5	0	0	33	58	420	49	1	2581	290.3	6.47	9731	494.04	57	31	9	1.22592e+08	1.25431e+08	1.26525e+08	1.3726e+08	1.47871e+08	1.47341e+08	1.47754e+08	1.58558e+08	1.54845e+08
High	High	Master Protein	Q92621	Nuclear pore complex protein Nup205 OS=Homo sapiens GN=NUP205 PE=1 SV=3	0	0	37	62	601	62	1	2012	227.8	6.19	13762	493.18	61	29	0	5.20159e+08	5.09675e+08	5.43857e+08	6.26384e+08	6.18135e+08	6.61118e+08	6.25001e+08	6.43031e+08	6.53976e+08	Acetyl [N-Term]
High	High	Master Protein	P61513	60S ribosomal protein L37a OS=Homo sapiens GN=RPL37A PE=1 SV=2	0	0	51	4	343	4	1	92	10.3	10.43	6537	492.7	4	3	0	8.77209e+08	9.32692e+08	8.99419e+08	1.38849e+09	1.19216e+09	1.24382e+09	1.12257e+09	1.27185e+09	1.23706e+09
High	High	Master Protein	P48147	Prolyl endopeptidase OS=Homo sapiens GN=PREP PE=1 SV=2	0	0	68	41	506	41	1	710	80.6	5.86	11777	492.48	41	19	0	5.43314e+08	5.17335e+08	5.37705e+08	6.43286e+08	6.46619e+08	6.80257e+08	6.72694e+08	6.47453e+08	6.88363e+08	Acetyl [N-Term]
High	High	Master Protein	O00515	Ladinin-1 OS=Homo sapiens GN=LAD1 PE=1 SV=2	0	0	50	32	456	32	1	517	57.1	9.67	10227	492.41	31	18	0	5.47122e+08	5.61973e+08	5.67706e+08	6.73555e+08	6.84323e+08	6.9392e+08	6.23423e+08	6.13223e+08	6.37141e+08
High	High	Master Protein	P61163	Alpha-centractin OS=Homo sapiens GN=ACTR1A PE=1 SV=1	0	0	65	23	450	11	1	376	42.6	6.64	9994	491.75	22	9	14	6.87224e+08	6.9411e+08	7.29097e+08	9.50464e+08	8.62148e+08	9.19691e+08	9.49304e+08	1.03748e+09	1.04038e+09	Acetyl [N-Term]
High	High	Master Protein	P84085	ADP-ribosylation factor 5 OS=Homo sapiens GN=ARF5 PE=1 SV=2	0	0	70	13	476	6	1	180	20.5	6.79	10702	489.75	13	7	0	2.99673e+08	3.2698e+08	3.20121e+08	4.02114e+08	4.01096e+08	3.57225e+08	4.36684e+08	4.50094e+08	4.67686e+08
High	High	Master Protein	Q9BY44	Eukaryotic translation initiation factor 2A OS=Homo sapiens GN=EIF2A PE=1 SV=3	0	0	68	32	447	32	1	585	64.9	8.87	9383	488.79	32	16	0	4.78487e+08	4.69751e+08	5.08079e+08	6.43501e+08	6.80505e+08	6.41694e+08	7.18241e+08	7.46137e+08	7.43725e+08
High	High	Master Protein	Q8NHW5	60S acidic ribosomal protein P0-like OS=Homo sapiens GN=RPLP0P6 PE=5 SV=1	0	0	42	12	374	1	1	317	34.3	5.55	7584	488.61	12	8	0
High	High	Master Protein	A0AVT1	Ubiquitin-like modifier-activating enzyme 6 OS=Homo sapiens GN=UBA6 PE=1 SV=1	0	0	62	51	564	51	1	1052	117.9	6.14	12293	488.42	50	23	0	6.89376e+08	6.62251e+08	6.78256e+08	7.55355e+08	8.27558e+08	8.12258e+08	8.81631e+08	9.11151e+08	9.43053e+08	Acetyl [N-Term]
High	High	Master Protein	Q01105	Protein SET OS=Homo sapiens GN=SET PE=1 SV=3	0	0	59	13	423	7	1	290	33.5	4.32	8941	488.11	13	9	6	2.82803e+09	2.83589e+09	2.97945e+09	3.60345e+09	3.39991e+09	3.55459e+09	4.26374e+09	4.45792e+09	4.42288e+09
High	High	Master Protein	Q16643	Drebrin OS=Homo sapiens GN=DBN1 PE=1 SV=4	0	0	53	30	467	29	1	649	71.4	4.45	10368	488.01	30	12	1	5.72999e+08	5.07123e+08	5.41979e+08	7.1493e+08	7.735e+08	7.6456e+08	8.3087e+08	9.01597e+08	8.7362e+08	Acetyl [N-Term]
High	High	Master Protein	Q9NXG2	THUMP domain-containing protein 1 OS=Homo sapiens GN=THUMPD1 PE=1 SV=2	0	0	73	27	397	27	1	353	39.3	7.88	8541	487.82	27	13	0	5.64809e+08	5.34931e+08	5.35456e+08	6.32981e+08	7.07994e+08	6.73283e+08	7.80909e+08	7.43734e+08	7.62115e+08	Acetyl [N-Term]
High	High	Master Protein	Q14376	UDP-glucose 4-epimerase OS=Homo sapiens GN=GALE PE=1 SV=2	0	0	64	20	341	20	1	348	38.3	6.73	6364	487.8	20	10	0	3.71134e+08	3.40907e+08	3.45264e+08	4.31359e+08	4.63881e+08	495857016	4.07481e+08	4.1708e+08	4.47323e+08
High	High	Master Protein	Q15276	Rab GTPase-binding effector protein 1 OS=Homo sapiens GN=RABEP1 PE=1 SV=2	0	0	56	44	409	44	1	862	99.2	5.01	8715	487.14	44	18	0	1.45707e+08	1.46512e+08	1.50148e+08	1.95402e+08	1.99178e+08	1.98554e+08	2.19489e+08	2.36152e+08	2.35794e+08	Acetyl [N-Term]
High	High	Master Protein	P55010	Eukaryotic translation initiation factor 5 OS=Homo sapiens GN=EIF5 PE=1 SV=2	0	0	55	30	519	30	1	431	49.2	5.58	11524	486.66	30	11	0	7.89408e+08	7.30536e+08	8.03941e+08	8.442e+08	9.21343e+08	9.09014e+08	1.11723e+09	1.13703e+09	1.09837e+09
High	High	Master Protein	Q9H2P0	Activity-dependent neuroprotector homeobox protein OS=Homo sapiens GN=ADNP PE=1 SV=1	0	0	59	55	537	55	1	1102	123.5	7.34	12249	486.07	53	25	0	4.5969e+08	4.08223e+08	4.29593e+08	4.9355e+08	5.14782e+08	5.34912e+08	4.93099e+08	5.25555e+08	5.29343e+08	Acetyl [N-Term]
High	High	Master Protein	O60231	Putative pre-mRNA-splicing factor ATP-dependent RNA helicase DHX16 OS=Homo sapiens GN=DHX16 PE=1 SV=2	0	0	41	40	435	38	1	1041	119.2	6.8	9156	484.97	40	14	1	2.23979e+08	2.13542e+08	2.23862e+08	2.99434e+08	2.88892e+08	2.65534e+08	2.46175e+08	2.63384e+08	2.64568e+08
High	High	Master Protein	P49903	Selenide, water dikinase 1 OS=Homo sapiens GN=SEPHS1 PE=1 SV=2	0	0	62	14	337	14	1	392	42.9	5.97	7099	484.72	13	11	0	2.2274e+08	2.3896e+08	2.66701e+08	3.32599e+08	3.53643e+08	3.42333e+08	3.71482e+08	3.9724e+08	3.78281e+08
High	High	Master Protein	P35908	Keratin, type II cytoskeletal 2 epidermal OS=Homo sapiens GN=KRT2 PE=1 SV=2	0	0	66	36	423	28	1	639	65.4	8	11040	484.32	35	18	2	1.67915e+08	1.74357e+08	1.85641e+08	3.52235e+08	3.68005e+08	3.70312e+08	3.76652e+08	3.84752e+08	3.79965e+08
High	High	Master Protein	Q8TEM1	Nuclear pore membrane glycoprotein 210 OS=Homo sapiens GN=NUP210 PE=1 SV=3	0	0	36	49	469	49	1	1887	205	6.81	10443	483.68	47	22	0	3.79002e+08	3.44936e+08	3.61748e+08	4.69201e+08	4.79249e+08	4.422e+08	6.09775e+08	5.64454e+08	5.68632e+08
High	High	Master Protein	Q9BZH6	WD repeat-containing protein 11 OS=Homo sapiens GN=WDR11 PE=1 SV=1	0	0	52	47	447	47	1	1224	136.6	6.92	10721	483.27	47	26	0	2.07322e+08	2.02118e+08	2.14986e+08	2.78753e+08	2.82437e+08	2.89579e+08	2.85793e+08	2.96623e+08	3.0547e+08	Acetyl [N-Term]
High	High	None	O14983	Sarcoplasmic/endoplasmic reticulum calcium ATPase 1 OS=Homo sapiens GN=ATP2A1 PE=1 SV=1	0	0	15	13	358	13	1	1001	110.2	5.16	9179	483.19	13	6	0	5.18411e+08	4.52749e+08	4.81515e+08	5.81717e+08	5.92137e+08	6.03631e+08	7.69507e+08	7.54449e+08	7.99281e+08
High	High	Master Protein	O60282	Kinesin heavy chain isoform 5C OS=Homo sapiens GN=KIF5C PE=1 SV=1	0	0	49	43	451	28	1	957	109.4	6.19	9940	483.06	43	20	0	3.88098e+07	3.48318e+07	3.71139e+07	4.95847e+07	5.21874e+07	5.41128e+07	5.55794e+07	5.227e+07	5.08919e+07
High	High	Master Protein	Q9UKY7	Protein CDV3 homolog OS=Homo sapiens GN=CDV3 PE=1 SV=1	0	0	70	13	389	13	1	258	27.3	6.4	11287	482.31	13	8	0	4.84098e+08	4.63995e+08	4.82964e+08	5.08454e+08	5.47126e+08	6.20716e+08	6.33367e+08	6.79062e+08	7.12577e+08
High	High	Master Protein	Q8WXH0	Nesprin-2 OS=Homo sapiens GN=SYNE2 PE=1 SV=3	0	0	24	126	587	125	1	6885	795.9	5.36	12827	482.06	123	50	1	1.68379e+08	1.6887e+08	1.61157e+08	1.77605e+08	1.8664e+08	1.80893e+08	1.86915e+08	1.88225e+08	1.97659e+08
High	High	Master Protein	P49756	RNA-binding protein 25 OS=Homo sapiens GN=RBM25 PE=1 SV=3	0	0	40	39	591	38	1	843	100.1	6.32	12572	481.31	39	17	1	6.55923e+08	6.37857e+08	6.40319e+08	8.04523e+08	7.64202e+08	7.93516e+08	8.16443e+08	8.48616e+08	9.20044e+08
High	High	Master Protein	Q00577	Transcriptional activator protein Pur-alpha OS=Homo sapiens GN=PURA PE=1 SV=2	0	0	75	17	335	16	1	322	34.9	6.44	6922	479.52	16	8	1	7.30248e+08	6.79938e+08	7.58641e+08	9.92618e+08	975365988	1.04803e+09	1.06291e+09	1.17055e+09	1.0436e+09
High	High	Master Protein	P62701	40S ribosomal protein S4, X isoform OS=Homo sapiens GN=RPS4X PE=1 SV=2	0	0	59	20	521	10	1	263	29.6	10.15	12951	478.66	20	8	11	3.19795e+09	2.78447e+09	2.99961e+09	3.85121e+09	3.87671e+09	3.89266e+09	4.00195e+09	3.94277e+09	4.01928e+09
High	High	Master Protein	P18615	Negative elongation factor E OS=Homo sapiens GN=NELFE PE=1 SV=3	0	0	52	17	320	17	1	380	43.2	9.33	9637	478.64	17	11	0	9.53686e+07	9.11889e+07	9.10154e+07	1.2774e+08	1.27348e+08	1.26358e+08	1.34053e+08	1.31385e+08	1.33567e+08
High	High	Master Protein	P07384	Calpain-1 catalytic subunit OS=Homo sapiens GN=CAPN1 PE=1 SV=1	0	0	66	43	585	43	1	714	81.8	5.67	12684	478.52	42	23	0	9.77303e+08	9.31483e+08	9.79335e+08	1.11412e+09	1.20766e+09	1.22269e+09	1.37506e+09	1.45838e+09	1.46235e+09	Acetyl [N-Term]
High	High	Master Protein	Q02252	Methylmalonate-semialdehyde dehydrogenase [acylating], mitochondrial OS=Homo sapiens GN=ALDH6A1 PE=1 SV=2	0	0	55	30	510	30	1	535	57.8	8.5	12436	478.26	30	14	0	7.38181e+08	7.15372e+08	7.17397e+08	8.50918e+08	9.68794e+08	9.72448e+08	1.07167e+09	1.11111e+09	1.10468e+09
High	High	Master Protein	O60502	Protein O-GlcNAcase OS=Homo sapiens GN=MGEA5 PE=1 SV=2	0	0	57	39	394	39	1	916	102.8	4.91	7820	477.17	38	20	0	3.15076e+08	3.35566e+08	3.61588e+08	335871644	3.57146e+08	3.5901e+08	4.40573e+08	4.55129e+08	4.35092e+08
High	High	Master Protein	P09525	Annexin A4 OS=Homo sapiens GN=ANXA4 PE=1 SV=4	0	0	66	25	456	24	1	319	35.9	6.13	11708	476.23	24	11	0	8.10489e+08	8.32719e+08	8.78564e+08	1.06613e+09	9.98777e+08	1.00212e+09	1.11229e+09	1.16846e+09	1.21779e+09
High	High	Master Protein	Q6IBS0	Twinfilin-2 OS=Homo sapiens GN=TWF2 PE=1 SV=2	0	0	62	19	271	16	1	349	39.5	6.84	5626	475.38	19	12	0	1.13444e+08	1.03953e+08	1.13756e+08	1.36948e+08	1.55487e+08	1.4834e+08	1.40051e+08	143429505	1.54723e+08	Acetyl [N-Term]
High	High	Master Protein	P14550	Alcohol dehydrogenase [NADP(+)] OS=Homo sapiens GN=AKR1A1 PE=1 SV=3	0	0	64	19	502	18	1	325	36.6	6.79	11342	475.12	19	9	2	1.94939e+09	1.94904e+09	1.88705e+09	2.45738e+09	2.57628e+09	2.44175e+09	2.56249e+09	2.80612e+09	2.52745e+09	Acetyl [N-Term]
High	High	Master Protein	Q8TAQ2	SWI/SNF complex subunit SMARCC2 OS=Homo sapiens GN=SMARCC2 PE=1 SV=1	0	0	46	60	618	48	1	1214	132.8	5.69	14640	473.96	58	24	13	7.08541e+08	6.6261e+08	7.01884e+08	7.42882e+08	8.40321e+08	8.33808e+08	7.96551e+08	8.80686e+08	8.95097e+08
High	High	Master Protein	P30040	Endoplasmic reticulum resident protein 29 OS=Homo sapiens GN=ERP29 PE=1 SV=4	0	0	53	11	358	11	1	261	29	7.31	8712	472.98	11	6	0	6.55214e+08	6.75738e+08	7.00378e+08	8.87337e+08	9.33225e+08	9.27774e+08	1.04097e+09	1.09893e+09	1.10696e+09
High	High	Master Protein	Q92597	Protein NDRG1 OS=Homo sapiens GN=NDRG1 PE=1 SV=1	0	0	54	12	349	12	1	394	42.8	5.82	8860	472.77	12	10	0	2.33831e+08	2.31662e+08	2.35287e+08	3.16653e+08	3.40295e+08	2.92697e+08	2.87931e+08	2.78282e+08	3.26264e+08
High	High	Master Protein	Q93052	Lipoma-preferred partner OS=Homo sapiens GN=LPP PE=1 SV=1	0	0	84	35	423	35	1	612	65.7	7.37	8747	472.32	33	27	0	3.73172e+08	3.66983e+08	3.50915e+08	5.51495e+08	5.62651e+08	5.65054e+08	5.61218e+08	5.98459e+08	5.6943e+08
High	High	Master Protein	Q9H583	HEAT repeat-containing protein 1 OS=Homo sapiens GN=HEATR1 PE=1 SV=3	0	0	38	72	550	72	1	2144	242.2	6.54	12059	471.67	69	27	0	3.60259e+08	3.4985e+08	3.61892e+08	3.87114e+08	3.91727e+08	3.89652e+08	4.07271e+08	3.94557e+08	4.05938e+08	Acetyl [N-Term]
High	High	Master Protein	Q14151	Scaffold attachment factor B2 OS=Homo sapiens GN=SAFB2 PE=1 SV=1	0	0	50	43	541	28	1	953	107.4	6.16	12843	471.43	43	17	0	1.2435e+08	1.23669e+08	1.32166e+08	1.37622e+08	1.62825e+08	1.64236e+08	1.45919e+08	1.72948e+08	1.63342e+08	Acetyl [N-Term]
High	High	Master Protein	Q5JRX3	Presequence protease, mitochondrial OS=Homo sapiens GN=PITRM1 PE=1 SV=3	0	0	59	50	520	50	1	1037	117.3	6.92	11323	471.34	50	23	0	5.3434e+08	4.92813e+08	5.24682e+08	6.35268e+08	6.56026e+08	6.64349e+08	8.54208e+08	8.71916e+08	8.56143e+08
High	High	Master Protein	Q92973	Transportin-1 OS=Homo sapiens GN=TNPO1 PE=1 SV=2	0	0	40	30	534	22	1	898	102.3	4.98	12474	471.25	30	16	0	6.04663e+08	5.84973e+08	6.15796e+08	7.11021e+08	7.40013e+08	7.40429e+08	7.91618e+08	8.27995e+08	7.93205e+08
High	High	Master Protein	Q6DD88	Atlastin-3 OS=Homo sapiens GN=ATL3 PE=1 SV=1	0	0	59	26	448	26	1	541	60.5	5.66	10134	471.17	24	16	0	3.47322e+08	3.39104e+08	3.65238e+08	4.18494e+08	4.34569e+08	4.66457e+08	5.12375e+08	5.13584e+08	5.07233e+08
High	High	Master Protein	Q96N67	Dedicator of cytokinesis protein 7 OS=Homo sapiens GN=DOCK7 PE=1 SV=4	0	0	41	72	504	64	1	2140	242.4	6.8	11608	470.7	70	28	8	3.24393e+08	3.14051e+08	3.13844e+08	3.96308e+08	4.06036e+08	4.24987e+08	4.2802e+08	4.55305e+08	4.51363e+08
High	High	Master Protein	P82979	SAP domain-containing ribonucleoprotein OS=Homo sapiens GN=SARNP PE=1 SV=3	0	0	61	15	325	15	1	210	23.7	6.42	10266	470.67	15	7	0	4.41321e+08	4.21137e+08	4.63159e+08	4.91591e+08	5.69672e+08	543952637	6.06644e+08	6.46586e+08	6.63402e+08	Acetyl [N-Term]
High	High	None	B2RPK0	Putative high mobility group protein B1-like 1 OS=Homo sapiens GN=HMGB1P1 PE=5 SV=1	0	0	29	10	434	5	1	211	24.2	6.21	10888	470.38	10	8	0	2.00709e+09	2.01965e+09	2.32081e+09	2.53018e+09	2.9228e+09	2.72701e+09	2.99964e+09	3.06841e+09	3.27359e+09
High	High	Master Protein	P38919	Eukaryotic initiation factor 4A-III OS=Homo sapiens GN=EIF4A3 PE=1 SV=4	0	0	62	27	566	22	1	411	46.8	6.73	13260	470.03	26	14	0	1.43783e+09	1.53379e+09	1.3823e+09	1.81407e+09	1.95986e+09	1.79819e+09	1.89133e+09	1.93344e+09	1.94935e+09	Acetyl [N-Term]
High	High	Master Protein	P41091	Eukaryotic translation initiation factor 2 subunit 3 OS=Homo sapiens GN=EIF2S3 PE=1 SV=3	0	0	51	21	601	21	1	472	51.1	8.4	15059	469.43	21	9	0	1.98881e+09	1.94984e+09	2.01351e+09	2.80446e+09	2.91981e+09	2.94431e+09	2.63038e+09	2.90116e+09	2.99023e+09	Acetyl [N-Term]
High	High	Master Protein	P26232	Catenin alpha-2 OS=Homo sapiens GN=CTNNA2 PE=1 SV=5	0	0	18	16	360	2	1	953	105.2	5.71	9318	469	15	10	0	326842	208461	253115			206916	1.03424e+06		1.12542e+06
High	High	Master Protein	Q9HB71	Calcyclin-binding protein OS=Homo sapiens GN=CACYBP PE=1 SV=2	0	0	68	23	539	23	1	228	26.2	8.25	12375	468.34	22	16	0	2.25489e+09	2.27458e+09	2.42821e+09	2.65015e+09	2.6673e+09	2.78997e+09	2.88814e+09	2.89762e+09	3.04871e+09	Acetyl [N-Term]
High	High	Master Protein	Q12972	Nuclear inhibitor of protein phosphatase 1 OS=Homo sapiens GN=PPP1R8 PE=1 SV=2	0	0	60	17	312	17	1	351	38.5	7.37	6598	466.63	17	9	0	1.89559e+08	1.82808e+08	2.06917e+08	2.55822e+08	2.61036e+08	2.55936e+08	2.79383e+08	2.85044e+08	2.84324e+08	Acetyl [N-Term]
High	High	Master Protein	Q8IWE2	Protein NOXP20 OS=Homo sapiens GN=FAM114A1 PE=1 SV=2	0	0	62	25	371	25	1	563	60.7	4.68	9513	466.41	25	14	0	2.00098e+08	1.90085e+08	2.02065e+08	2.25139e+08	2.37068e+08	2.29508e+08	2.32123e+08	2.47802e+08	2.53881e+08	Acetyl [N-Term]
High	High	Master Protein	P62879	Guanine nucleotide-binding protein G(I)/G(S)/G(T) subunit beta-2 OS=Homo sapiens GN=GNB2 PE=1 SV=3	0	0	69	15	361	6	1	340	37.3	6	8331	466.29	15	9	3	1.69159e+08	1.64357e+08	1.62138e+08	2.25127e+08	2.18193e+08	2.09787e+08	2.70818e+08	2.60262e+08	2.47269e+08	Acetyl [N-Term]
High	High	Master Protein	P17844	Probable ATP-dependent RNA helicase DDX5 OS=Homo sapiens GN=DDX5 PE=1 SV=1	0	0	63	45	663	36	1	614	69.1	8.92	14879	465.82	45	17	9	3.43806e+09	3.45389e+09	3.5915e+09	4.35002e+09	4.5689e+09	4.48822e+09	5.28446e+09	5.44579e+09	5.48282e+09	Acetyl [N-Term]
High	High	Master Protein	Q12769	Nuclear pore complex protein Nup160 OS=Homo sapiens GN=NUP160 PE=1 SV=3	0	0	36	41	445	41	1	1436	162	5.5	10364	465.52	41	18	0	2.45984e+08	2.46906e+08	2.59863e+08	2.91723e+08	3.13047e+08	3.23221e+08	3.18324e+08	3.29463e+08	3.21777e+08
High	High	Master Protein	P26583	High mobility group protein B2 OS=Homo sapiens GN=HMGB2 PE=1 SV=2	0	0	52	18	502	15	1	209	24	7.81	12162	465.47	18	11	0	1.51035e+09	1.49784e+09	1.64029e+09	2.34725e+09	2.32745e+09	2.48417e+09	2.19812e+09	2.31271e+09	2.29366e+09	Acetyl [N-Term]
High	High	Master Protein	Q9UNZ2	NSFL1 cofactor p47 OS=Homo sapiens GN=NSFL1C PE=1 SV=2	0	0	70	27	388	27	1	370	40.5	5.1	9319	465.02	27	14	0	5.30198e+08	4.95645e+08	5.42285e+08	5.87006e+08	6.23614e+08	5.93126e+08	7.16857e+08	7.20111e+08	7.53621e+08
High	High	Master Protein	Q15819	Ubiquitin-conjugating enzyme E2 variant 2 OS=Homo sapiens GN=UBE2V2 PE=1 SV=4	0	0	65	9	370	3	1	145	16.4	8.09	9871	464.75	9	3	0	1.35412e+08	1.19215e+08	1.40079e+08	1.80019e+08	1.74022e+08	1.84201e+08	1.97347e+08	1.79585e+08	1.83909e+08
High	High	Master Protein	P30044	Peroxiredoxin-5, mitochondrial OS=Homo sapiens GN=PRDX5 PE=1 SV=4	0	0	57	11	352	11	1	214	22.1	8.7	6641	464.02	10	9	0	9.73626e+08	9.62763e+08	1.05769e+09	1.46406e+09	1.5058e+09	1.55653e+09	1.84137e+09	1.72303e+09	1.92561e+09
High	High	Master Protein	O15355	Protein phosphatase 1G OS=Homo sapiens GN=PPM1G PE=1 SV=1	0	0	55	27	421	27	1	546	59.2	4.36	11658	464	27	14	0	5.08729e+08	5.0244e+08	5.31164e+08	6.27477e+08	6.09705e+08	6.37832e+08	6.47954e+08	6.95995e+08	6.9835e+08
High	High	Master Protein	P31946	14-3-3 protein beta/alpha OS=Homo sapiens GN=YWHAB PE=1 SV=3	0	0	71	17	630	8	1	246	28.1	4.83	15510	463.49	17	6	0	2.13532e+09	2.17419e+09	2.11911e+09	2.34541e+09	2.67073e+09	2.62247e+09	2.99969e+09	3.09301e+09	2.76995e+09
High	High	Master Protein	Q9UNF1	Melanoma-associated antigen D2 OS=Homo sapiens GN=MAGED2 PE=1 SV=2	0	0	58	32	450	31	1	606	64.9	9.32	10706	463.49	31	19	1	2.93237e+08	3.17775e+08	3.29421e+08	3.70506e+08	3.91344e+08	4.06943e+08	4.60104e+08	4.64899e+08	4.68289e+08	Acetyl [N-Term]
High	High	Master Protein	P26358	DNA (cytosine-5)-methyltransferase 1 OS=Homo sapiens GN=DNMT1 PE=1 SV=2	0	0	49	66	573	65	1	1616	183.1	7.75	13542	460.28	65	30	1	2.6095e+08	2.57288e+08	2.65633e+08	2.61763e+08	2.71629e+08	2.71878e+08	2.41433e+08	2.61053e+08	2.43339e+08
High	High	Master Protein	Q7Z4S6	Kinesin-like protein KIF21A OS=Homo sapiens GN=KIF21A PE=1 SV=2	0	0	30	37	342	32	1	1674	187.1	6.42	8926	459.99	36	21	6	8.29544e+07	8.44605e+07	7.96283e+07	1.1011e+08	1.05942e+08	1.09618e+08	1.18409e+08	1.31999e+08	1.27588e+08	Acetyl [N-Term]
High	High	Master Protein	Q12756	Kinesin-like protein KIF1A OS=Homo sapiens GN=KIF1A PE=1 SV=2	0	0	49	61	436	45	1	1690	190.9	6.21	10086	459.63	57	28	16	1.87045e+08	1.89409e+08	1.94101e+08	2.23592e+08	2.32299e+08	2.30854e+08	2.3545e+08	2.67953e+08	2.7798e+08
High	High	Master Protein	Q96L91	E1A-binding protein p400 OS=Homo sapiens GN=EP400 PE=1 SV=4	0	0	30	60	339	57	1	3159	343.3	9.19	7301	459.6	57	31	2	6.447e+07	6.49776e+07	6.79652e+07	8.72269e+07	9.24734e+07	8.63846e+07	1.04278e+08	1.04736e+08	1.04204e+08
High	High	Master Protein	O60341	Lysine-specific histone demethylase 1A OS=Homo sapiens GN=KDM1A PE=1 SV=2	0	0	63	39	449	39	1	852	92.8	6.52	10500	458.55	39	19	0	3.81358e+08	3.94749e+08	4.22094e+08	4.31588e+08	4.6286e+08	4.56041e+08	4.60646e+08	4.86345e+08	5.25075e+08
High	High	Master Protein	P37802	Transgelin-2 OS=Homo sapiens GN=TAGLN2 PE=1 SV=3	0	0	81	17	488	17	1	199	22.4	8.25	11234	458.51	17	10	0	3.16833e+09	3.09937e+09	3.29633e+09	3.52211e+09	3.5064e+09	3.37167e+09	3.7188e+09	3.85649e+09	3.73669e+09	Acetyl [N-Term]
High	High	Master Protein	Q96R06	Sperm-associated antigen 5 OS=Homo sapiens GN=SPAG5 PE=1 SV=2	0	0	51	43	379	43	1	1193	134.3	5	8272	458.22	41	26	0	1.59485e+08	1.59367e+08	1.60984e+08	1.64973e+08	1.61452e+08	1.55512e+08	1.53034e+08	1.54316e+08	1.45089e+08
High	High	Master Protein	P19623	Spermidine synthase OS=Homo sapiens GN=SRM PE=1 SV=1	0	0	80	17	406	17	1	302	33.8	5.49	9216	457.55	17	12	0	9.57799e+08	1.00665e+09	9.39772e+08	1.21839e+09	1.25548e+09	1.22826e+09	1.47401e+09	1356130643	1.33656e+09	Acetyl [N-Term]
High	High	Master Protein	O14818	Proteasome subunit alpha type-7 OS=Homo sapiens GN=PSMA7 PE=1 SV=1	0	0	71	18	414	18	1	248	27.9	8.46	9240	457.36	18	8	0	1.43862e+09	1.50374e+09	1.46108e+09	1.90232e+09	1.81252e+09	1.88477e+09	1.932e+09	1.90104e+09	1.99588e+09
High	High	Master Protein	P51570	Galactokinase OS=Homo sapiens GN=GALK1 PE=1 SV=1	0	0	60	26	364	26	1	392	42.2	6.46	8292	455.63	25	14	0	4.36884e+08	4.26502e+08	4.32605e+08	5.18138e+08	5.10159e+08	5.39178e+08	5.95321e+08	5.75777e+08	6.11583e+08	Acetyl [N-Term]
High	High	Master Protein	P57740	Nuclear pore complex protein Nup107 OS=Homo sapiens GN=NUP107 PE=1 SV=1	0	0	48	40	355	40	1	925	106.3	5.43	7393	455.46	39	19	0	2.99928e+08	3.09964e+08	3.33708e+08	3.74797e+08	4.08793e+08	4.2967e+08	4.19988e+08	4.56477e+08	4.48164e+08
High	High	Master Protein	Q2M2I8	AP2-associated protein kinase 1 OS=Homo sapiens GN=AAK1 PE=1 SV=3	0	0	42	27	359	25	1	961	103.8	6.6	9055	455.24	27	17	2	1.43361e+08	1.4022e+08	1.51583e+08	1.70028e+08	1.74712e+08	1.783e+08	1.56156e+08	1.66241e+08	1.66523e+08
High	High	Master Protein	Q5ZPR3	CD276 antigen OS=Homo sapiens GN=CD276 PE=1 SV=1	0	0	37	9	294	9	1	534	57.2	4.91	7833	454.65	9	7	0	9.67318e+07	9.26605e+07	9.7198e+07	1.36587e+08	126839492	1.37003e+08	1.79055e+08	2.01293e+08	1.94476e+08
High	High	Master Protein	O14579	Coatomer subunit epsilon OS=Homo sapiens GN=COPE PE=1 SV=3	0	0	69	19	366	19	1	308	34.5	5.12	7690	454.07	19	10	0	5.7702e+08	6.01799e+08	6.38005e+08	8.49704e+08	8.73309e+08	8.68372e+08	8.85003e+08	8.79462e+08	8.79092e+08
High	High	Master Protein	P62140	Serine/threonine-protein phosphatase PP1-beta catalytic subunit OS=Homo sapiens GN=PPP1CB PE=1 SV=3	0	0	76	24	468	11	1	327	37.2	6.19	10522	452.72	24	10	12	1.31352e+09	1.15329e+09	1.32304e+09	1.51425e+09	1.67567e+09	1.63965e+09	1.62459e+09	1.82091e+09	1.79652e+09	Acetyl [N-Term]
High	High	Master Protein	P47755	F-actin-capping protein subunit alpha-2 OS=Homo sapiens GN=CAPZA2 PE=1 SV=3	0	0	77	15	331	12	1	286	32.9	5.85	6950	452.6	15	10	0	1.89394e+08	1.70325e+08	1.92413e+08	2.23097e+08	250983216	2.31881e+08	2.57544e+08	2.56874e+08	2.47799e+08	Acetyl [N-Term]
High	High	Master Protein	Q8N1F7	Nuclear pore complex protein Nup93 OS=Homo sapiens GN=NUP93 PE=1 SV=2	0	0	67	51	532	51	1	819	93.4	5.72	13489	452.57	50	16	0	1.18602e+09	1.15295e+09	1.20531e+09	1.33857e+09	1.35593e+09	1.39527e+09	1.38129e+09	1.48518e+09	1.54677e+09
High	High	Master Protein	Q14258	E3 ubiquitin/ISG15 ligase TRIM25 OS=Homo sapiens GN=TRIM25 PE=1 SV=2	0	0	64	37	551	37	1	630	70.9	8.09	13912	452.38	36	24	0	9.73841e+08	9.32828e+08	9.94013e+08	1.22286e+09	1.32018e+09	1.31534e+09	1.28881e+09	1.33679e+09	1.29031e+09
High	High	Master Protein	P46783	40S ribosomal protein S10 OS=Homo sapiens GN=RPS10 PE=1 SV=1	0	0	62	13	530	13	1	165	18.9	10.15	12623	451.48	13	5	0	1.93913e+09	1.9106e+09	2.15587e+09	2.5601e+09	2.86805e+09	3.03938e+09	2.59785e+09	2.80282e+09	2.76394e+09
High	High	Master Protein	O60306	Intron-binding protein aquarius OS=Homo sapiens GN=AQR PE=1 SV=4	0	0	44	54	425	53	1	1485	171.2	6.37	9282	451.1	52	21	1	3.16835e+08	3.16588e+08	3.32583e+08	3.58365e+08	3.95127e+08	3.96017e+08	3.51013e+08	3.73034e+08	3.7619e+08
High	High	Master Protein	P31948	Stress-induced-phosphoprotein 1 OS=Homo sapiens GN=STIP1 PE=1 SV=1	0	0	68	43	859	43	1	543	62.6	6.8	18337	451.06	43	14	0	6.36221e+09	5.94144e+09	6.64883e+09	7632868300	7.80578e+09	8.2784e+09	9.10624e+09	9.90665e+09	9.6265e+09	Acetyl [N-Term]
High	High	Master Protein	Q9BVJ6	U3 small nucleolar RNA-associated protein 14 homolog A OS=Homo sapiens GN=UTP14A PE=1 SV=1	0	0	60	42	411	42	1	771	87.9	7.87	8873	450.68	42	21	0	2.62348e+08	2.37387e+08	2.54485e+08	3.01725e+08	3.12118e+08	3.10269e+08	3.57114e+08	3.67115e+08	3.71185e+08
High	High	Master Protein	Q9BW04	Specifically androgen-regulated gene protein OS=Homo sapiens GN=SARG PE=1 SV=2	0	0	69	34	459	34	1	601	63.9	8.62	11025	450.58	32	19	0	7.38071e+08	7.29136e+08	7.26936e+08	8.37019e+08	8.90839e+08	9.23555e+08	7.24308e+08	7.12262e+08	7.2939e+08
High	High	Master Protein	P09661	U2 small nuclear ribonucleoprotein A' OS=Homo sapiens GN=SNRPA1 PE=1 SV=2	0	0	58	15	334	15	1	255	28.4	8.62	6844	448.98	15	6	0	3.36012e+08	3.50561e+08	3.624e+08	3.60778e+08	3.93507e+08	4.16569e+08	4.58489e+08	4.26154e+08	4.50032e+08
High	High	Master Protein	P49591	Serine--tRNA ligase, cytoplasmic OS=Homo sapiens GN=SARS PE=1 SV=3	0	0	57	27	437	27	1	514	58.7	6.43	10771	448.9	26	13	0	1.10507e+09	1.01059e+09	1.09982e+09	1.61887e+09	1.55783e+09	1.62869e+09	1.56738e+09	1.63066e+09	1.64463e+09
High	High	Master Protein	O00442	RNA 3'-terminal phosphate cyclase OS=Homo sapiens GN=RTCA PE=1 SV=1	0	0	55	17	334	17	1	366	39.3	7.85	8796	448.76	17	10	0	2.55079e+08	2.60246e+08	2.70662e+08	3.57899e+08	3.66634e+08	3.70945e+08	3.80081e+08	3.81542e+08	3.76834e+08
High	High	Master Protein	Q16630	Cleavage and polyadenylation specificity factor subunit 6 OS=Homo sapiens GN=CPSF6 PE=1 SV=2	0	0	28	13	339	13	1	551	59.2	7.15	8070	448.73	12	11	0	5.25487e+08	5.16304e+08	5.19732e+08	6.09996e+08	6.75431e+08	6.87178e+08	7.13277e+08	6.91344e+08	7.16845e+08
High	High	Master Protein	Q8NB90	Spermatogenesis-associated protein 5 OS=Homo sapiens GN=SPATA5 PE=1 SV=3	0	0	58	37	371	36	1	893	97.8	5.66	8256	448	37	22	1	2.34107e+08	2.44286e+08	2.2165e+08	2.74173e+08	2.77329e+08	2.8716e+08	2.96637e+08	3.03314e+08	3.21396e+08
High	High	Master Protein	Q9UHB6	LIM domain and actin-binding protein 1 OS=Homo sapiens GN=LIMA1 PE=1 SV=1	0	0	61	42	536	42	1	759	85.2	6.84	13942	447.46	42	21	0	4.63575e+08	4.49304e+08	4.95767e+08	6.0127e+08	6.47285e+08	6.37816e+08	6.76799e+08	7.79478e+08	7.44605e+08	Acetyl [N-Term]
High	High	Master Protein	Q9NSE4	Isoleucine--tRNA ligase, mitochondrial OS=Homo sapiens GN=IARS2 PE=1 SV=2	0	0	48	40	453	40	1	1012	113.7	7.2	10402	447.34	39	22	0	4.78839e+08	4.84577e+08	4.57896e+08	6.32875e+08	6.54691e+08	6.27432e+08	7.86257e+08	7.68052e+08	8.07633e+08
High	High	Master Protein	P21266	Glutathione S-transferase Mu 3 OS=Homo sapiens GN=GSTM3 PE=1 SV=3	0	0	74	19	602	19	1	225	26.5	5.54	15972	447.17	19	11	0	1.36085e+09	1.27225e+09	1.30427e+09	1.69185e+09	1.61456e+09	1.7029e+09	1.81065e+09	1.9094e+09	2.01333e+09	Acetyl [N-Term]
High	High	Master Protein	Q8TEQ6	Gem-associated protein 5 OS=Homo sapiens GN=GEMIN5 PE=1 SV=3	0	0	47	55	487	55	1	1508	168.5	6.62	10916	446.55	53	26	0	2.91514e+08	2.76608e+08	2.95957e+08	3.35252e+08	3.59165e+08	3.72427e+08	3.71813e+08	3.81308e+08	3.75105e+08
High	High	Master Protein	O95793	Double-stranded RNA-binding protein Staufen homolog 1 OS=Homo sapiens GN=STAU1 PE=1 SV=2	0	0	61	32	483	30	1	577	63.1	9.44	12526	446.17	31	21	2	4.97293e+08	5.09553e+08	5.15872e+08	6.00485e+08	6.61808e+08	6.4776e+08	6.34151e+08	6.41249e+08	6.51566e+08	Acetyl [N-Term]
High	High	Master Protein	Q53EL6	Programmed cell death protein 4 OS=Homo sapiens GN=PDCD4 PE=1 SV=2	0	0	61	23	387	23	1	469	51.7	5.21	9875	445.2	22	12	0	4.08342e+08	4.2614e+08	4.38806e+08	5.30175e+08	5.6386e+08	5.63267e+08	5.73873e+08	5.94449e+08	6.03898e+08
High	High	Master Protein	P49773	Histidine triad nucleotide-binding protein 1 OS=Homo sapiens GN=HINT1 PE=1 SV=2	0	0	79	10	372	10	1	126	13.8	6.95	10482	444.33	10	6	0	1.52461e+09	1.56065e+09	1.61814e+09	2.04835e+09	2.13914e+09	2.09285e+09	2.13953e+09	2.25212e+09	2.28646e+09
High	High	Master Protein	Q8TBC4	NEDD8-activating enzyme E1 catalytic subunit OS=Homo sapiens GN=UBA3 PE=1 SV=2	0	0	62	22	366	22	1	463	51.8	5.45	8475	444.16	21	13	0	4.81546e+08	4.606e+08	4.86808e+08	5.94216e+08	5.9435e+08	5.77289e+08	5.81074e+08	5.77488e+08	5.8831e+08	Acetyl [N-Term]
High	High	Master Protein	P16152	Carbonyl reductase [NADPH] 1 OS=Homo sapiens GN=CBR1 PE=1 SV=3	0	0	81	20	421	17	1	277	30.4	8.32	10652	443.65	19	11	3	9.20841e+08	9.28244e+08	8.64291e+08	1.11797e+09	1.16043e+09	1.14183e+09	1.10861e+09	1.09226e+09	1.11762e+09	Acetyl [N-Term]
High	High	None	Q2VIR3	Putative eukaryotic translation initiation factor 2 subunit 3-like protein OS=Homo sapiens GN=EIF2S3L PE=5 SV=2	0	0	41	17	541	17	1	472	51.2	8.4	13577	442.63	17	7	0	1.56951e+09	1.59367e+09	1.63026e+09	2.26853e+09	2.35395e+09	2.39345e+09	2.01788e+09	2.3193e+09	2.3677e+09	Acetyl [N-Term]
High	High	Master Protein	P43487	Ran-specific GTPase-activating protein OS=Homo sapiens GN=RANBP1 PE=1 SV=1	0	0	75	15	350	14	1	201	23.3	5.29	7131	442	15	9	0	1.87307e+09	1.82074e+09	1.748e+09	1.84411e+09	1.83273e+09	1.86792e+09	1.99793e+09	2.10609e+09	2.15075e+09
High	High	Master Protein	O00148	ATP-dependent RNA helicase DDX39A OS=Homo sapiens GN=DDX39A PE=1 SV=2	0	0	62	27	622	11	1	427	49.1	5.68	13854	441.93	27	10	19	2.68822e+09	2.50599e+09	2.63611e+09	3.21544e+09	3.47556e+09	3.26562e+09	3.25879e+09	3.42783e+09	3.35358e+09	Acetyl [N-Term]
High	High	Master Protein	P62136	Serine/threonine-protein phosphatase PP1-alpha catalytic subunit OS=Homo sapiens GN=PPP1CA PE=1 SV=1	0	0	72	22	451	6	1	330	37.5	6.33	9803	441.77	22	12	4	2.85289e+08	2.72945e+08	3.04289e+08	4.108e+08	4.42193e+08	4.08398e+08	4.27501e+08	4.98046e+08	5.06546e+08
High	High	Master Protein	O95232	Luc7-like protein 3 OS=Homo sapiens GN=LUC7L3 PE=1 SV=2	0	0	42	20	389	18	1	432	51.4	9.79	10458	441.72	20	8	1	3.69009e+08	3.54197e+08	3.47733e+08	4.51069e+08	4.73453e+08	4.68661e+08	5.51165e+08	5.47084e+08	5.53053e+08	Acetyl [N-Term]
High	High	Master Protein	Q13617	Cullin-2 OS=Homo sapiens GN=CUL2 PE=1 SV=2	0	0	58	38	469	38	1	745	86.9	6.92	10599	441.5	38	13	0	4.51483e+08	4.5641e+08	4.74022e+08	5.84386e+08	6.25922e+08	6.11806e+08	7.29278e+08	7.66545e+08	7.55751e+08
High	High	Master Protein	Q9UIA9	Exportin-7 OS=Homo sapiens GN=XPO7 PE=1 SV=3	0	0	51	49	494	48	1	1087	123.8	6.32	11285	441.23	49	21	1	4.91165e+08	4.96306e+08	4.99406e+08	5.94065e+08	5.70375e+08	5.92219e+08	6.76286e+08	6.97613e+08	7.22214e+08	Acetyl [N-Term]
High	High	Master Protein	P53582	Methionine aminopeptidase 1 OS=Homo sapiens GN=METAP1 PE=1 SV=2	0	0	61	20	375	20	1	386	43.2	7.17	8589	441.21	20	14	0	2.81257e+08	2.95824e+08	3.11887e+08	3.71806e+08	3.75332e+08	3.62774e+08	4.06113e+08	4.07588e+08	4.43446e+08
High	High	Master Protein	O75717	WD repeat and HMG-box DNA-binding protein 1 OS=Homo sapiens GN=WDHD1 PE=1 SV=1	0	0	61	53	521	53	1	1129	125.9	5.62	13474	441.19	53	21	0	3.11069e+08	3.00568e+08	3.03447e+08	2.68481e+08	2.6914e+08	2.79876e+08	2.84101e+08	2.80909e+08	2.88659e+08
High	High	Master Protein	Q969V3	Nicalin OS=Homo sapiens GN=NCLN PE=1 SV=2	0	0	43	23	344	23	1	563	62.9	6.89	9525	440.52	22	15	0	2.27216e+08	2.19975e+08	2.18007e+08	2.82647e+08	2.73107e+08	2.90051e+08	3.38315e+08	3.45223e+08	3.44562e+08
High	High	Master Protein	O95140	Mitofusin-2 OS=Homo sapiens GN=MFN2 PE=1 SV=3	0	0	46	31	369	30	1	757	86.3	6.98	7793	440.17	31	17	1	1.69396e+08	1.65653e+08	1.62958e+08	2.28889e+08	2.42769e+08	249048724	2.08169e+08	2.31116e+08	2.22607e+08
High	High	Master Protein	Q9Y485	DmX-like protein 1 OS=Homo sapiens GN=DMXL1 PE=1 SV=3	0	0	33	69	384	66	1	3027	337.6	6.34	7545	439.77	65	26	3	1.21796e+08	1.1886e+08	1.31368e+08	1.58167e+08	1.83694e+08	1.6881e+08	1.82958e+08	1.87578e+08	1.95804e+08	Acetyl [N-Term]
High	High	Master Protein	Q15785	Mitochondrial import receptor subunit TOM34 OS=Homo sapiens GN=TOMM34 PE=1 SV=2	0	0	68	20	346	20	1	309	34.5	8.98	9034	439.68	20	7	0	3.18311e+08	3.27342e+08	3.56835e+08	3.80661e+08	4.1647e+08	4.36682e+08	4.83162e+08	5.02445e+08	4.99835e+08
High	High	Master Protein	Q13451	Peptidyl-prolyl cis-trans isomerase FKBP5 OS=Homo sapiens GN=FKBP5 PE=1 SV=2	0	0	68	35	461	35	1	457	51.2	5.9	9820	439.6	35	16	0	8.29458e+08	7.62264e+08	8.25531e+08	8.56741e+08	8.21943e+08	8.74111e+08	8.17289e+08	8.55588e+08	8.2424e+08
High	High	Master Protein	P39748	Flap endonuclease 1 OS=Homo sapiens GN=FEN1 PE=1 SV=1	0	0	56	18	374	18	1	380	42.6	8.62	8639	438.48	17	9	0	8.72264e+08	8.50966e+08	8.61065e+08	8.76766e+08	9.0477e+08	9.48588e+08	9.41034e+08	9.61028e+08	9.95233e+08
High	High	Master Protein	Q6UWE0	E3 ubiquitin-protein ligase LRSAM1 OS=Homo sapiens GN=LRSAM1 PE=1 SV=1	0	0	64	40	396	40	1	723	83.5	5.94	8834	438.38	39	21	0	2.24653e+08	2.24486e+08	2.30849e+08	2.89549e+08	3.17422e+08	2.97879e+08	2.98265e+08	2.85316e+08	2.97677e+08
High	High	Master Protein	Q9NTK5	Obg-like ATPase 1 OS=Homo sapiens GN=OLA1 PE=1 SV=2	0	0	76	27	428	27	1	396	44.7	7.81	10001	438.25	23	14	0	1.39901e+09	1.29269e+09	1.32468e+09	1.70333e+09	1.79195e+09	1.74991e+09	1.66466e+09	1.80588e+09	1.8845e+09
High	High	Master Protein	P40692	DNA mismatch repair protein Mlh1 OS=Homo sapiens GN=MLH1 PE=1 SV=1	0	0	66	42	405	42	1	756	84.5	5.72	8487	438.07	41	18	0	2.82823e+08	2.73413e+08	2.80851e+08	2.77753e+08	3.19462e+08	3.14502e+08	295892562	3.33389e+08	3.12481e+08
High	High	Master Protein	P27635	60S ribosomal protein L10 OS=Homo sapiens GN=RPL10 PE=1 SV=4	0	0	47	10	428	10	1	214	24.6	10.08	10022	437.79	10	4	0	2.09234e+09	1.99481e+09	2.13579e+09	2.93586e+09	3.27647e+09	3.12169e+09	2.92536e+09	3.14115e+09	3.27961e+09
High	High	Master Protein	Q07866	Kinesin light chain 1 OS=Homo sapiens GN=KLC1 PE=1 SV=2	0	0	68	39	482	27	1	573	65.3	6.2	11462	437.55	39	20	12	6.83688e+08	7.00252e+08	6.89798e+08	9.02494e+08	8.94779e+08	8.95885e+08	9.8069e+08	1.01476e+09	1.02361e+09
High	High	Master Protein	O14828	Secretory carrier-associated membrane protein 3 OS=Homo sapiens GN=SCAMP3 PE=1 SV=3	0	0	46	15	265	15	1	347	38.3	7.64	7092	437.4	15	8	0	3.36437e+08	3.44016e+08	3.2405e+08	3.90422e+08	3.87823e+08	369638951	4.33185e+08	4.28278e+08	4.53909e+08
High	High	Master Protein	P40222	Alpha-taxilin OS=Homo sapiens GN=TXLNA PE=1 SV=3	0	0	71	41	486	41	1	546	61.9	6.52	10443	437.08	41	18	0	5.83802e+08	5.67534e+08	5.78401e+08	7.40096e+08	7.47211e+08	7.74084e+08	8.87404e+08	9.1456e+08	8.93663e+08
High	High	Master Protein	Q9BTW9	Tubulin-specific chaperone D OS=Homo sapiens GN=TBCD PE=1 SV=2	0	0	48	47	445	47	1	1192	132.5	6.19	10043	436.87	47	23	0	3.22421e+08	3.15796e+08	3.46202e+08	4.05473e+08	3.98682e+08	4.19234e+08	4.22119e+08	4.66812e+08	4.63064e+08
High	High	Master Protein	Q92922	SWI/SNF complex subunit SMARCC1 OS=Homo sapiens GN=SMARCC1 PE=1 SV=3	0	0	49	56	653	44	1	1105	122.8	5.76	16254	436.46	56	27	0	2.98435e+08	2.89272e+08	2.86436e+08	3.0888e+08	3.55746e+08	3.5131e+08	3.22822e+08	3.40516e+08	3.16561e+08	Acetyl [N-Term]
High	High	Master Protein	Q8NEU8	DCC-interacting protein 13-beta OS=Homo sapiens GN=APPL2 PE=1 SV=3	0	0	77	38	352	37	1	664	74.4	4.94	6899	436.45	36	25	1	2.09696e+08	2.09628e+08	2.0797e+08	2.71537e+08	2.66977e+08	2.74187e+08	2.34213e+08	2.3668e+08	2.42134e+08
High	High	Master Protein	O75131	Copine-3 OS=Homo sapiens GN=CPNE3 PE=1 SV=1	0	0	52	26	560	25	1	537	60.1	5.85	12456	436.04	26	10	1	3.99934e+09	3.91692e+09	4.14642e+09	4.44313e+09	4.87525e+09	4.92968e+09	5.15181e+09	5.02119e+09	5.24022e+09	Acetyl [N-Term]
High	High	Master Protein	Q9UJU6	Drebrin-like protein OS=Homo sapiens GN=DBNL PE=1 SV=1	0	0	62	27	439	27	1	430	48.2	5.05	9801	435.25	26	14	0	5.34422e+08	5.48217e+08	5.74022e+08	7.31778e+08	7.71928e+08	7.76699e+08	8.81994e+08	8.74821e+08	9.09955e+08
High	High	Master Protein	Q16513	Serine/threonine-protein kinase N2 OS=Homo sapiens GN=PKN2 PE=1 SV=1	0	0	51	45	416	41	1	984	112	6.3	9356	435.13	45	23	4	2.43757e+08	2.48643e+08	2.5173e+08	2.57323e+08	2.64775e+08	2.571e+08	3.05835e+08	3.0417e+08	3.20043e+08	Acetyl [N-Term]
High	High	Master Protein	Q9C0C9	(E3-independent) E2 ubiquitin-conjugating enzyme OS=Homo sapiens GN=UBE2O PE=1 SV=3	0	0	51	52	572	52	1	1292	141.2	5.12	14105	434.98	52	25	0	4.30708e+08	4.20794e+08	4.49265e+08	4.65813e+08	5.07336e+08	5.28483e+08	6.00676e+08	6.27776e+08	6.35143e+08
High	High	Master Protein	Q8N9T8	Protein KRI1 homolog OS=Homo sapiens GN=KRI1 PE=1 SV=3	0	0	41	25	385	25	1	703	82.5	5.14	8840	434.53	25	14	0	2.107e+08	2.06328e+08	2.1917e+08	2.62096e+08	2.74736e+08	2.77575e+08	2.72755e+08	2.83043e+08	2.87065e+08
High	High	Master Protein	Q16222	UDP-N-acetylhexosamine pyrophosphorylase OS=Homo sapiens GN=UAP1 PE=1 SV=3	0	0	63	26	439	24	1	522	58.7	6.33	10014	434.31	26	12	2	8.41073e+08	8.25787e+08	8.96746e+08	8.19382e+08	8.84343e+08	9.12375e+08	8.90014e+08	9.19154e+08	8.97447e+08
High	High	Master Protein	P68036	Ubiquitin-conjugating enzyme E2 L3 OS=Homo sapiens GN=UBE2L3 PE=1 SV=1	0	0	69	10	241	10	1	154	17.9	8.51	4281	434.14	10	6	0	8.05599e+08	8.43848e+08	8.39082e+08	9.29594e+08	1.0558e+09	8.67238e+08	1.09263e+09	1.02882e+09	9.8711e+08
High	High	Master Protein	P62081	40S ribosomal protein S7 OS=Homo sapiens GN=RPS7 PE=1 SV=1	0	0	60	15	386	15	1	194	22.1	10.1	7058	433.98	14	4	0	2.16625e+09	2.10037e+09	2.05287e+09	2.93176e+09	2.85477e+09	2.94304e+09	3.24705e+09	3.07131e+09	3.44272e+09
High	High	Master Protein	P11908	Ribose-phosphate pyrophosphokinase 2 OS=Homo sapiens GN=PRPS2 PE=1 SV=2	0	0	62	18	397	7	1	318	34.7	6.61	9217	433.74	18	8	0	1.50063e+08	1.36911e+08	1.34356e+08	1.46496e+08	1.44443e+08	1.47473e+08	1.2555e+08	1.35068e+08	133849482
High	High	Master Protein	Q92734	Protein TFG OS=Homo sapiens GN=TFG PE=1 SV=2	0	0	46	16	310	16	1	400	43.4	5.1	6879	432.97	16	9	0	5.89979e+08	6.05308e+08	6.0643e+08	7.01553e+08	7.38352e+08	7.08902e+08	8.53311e+08	8.4592e+08	8.36622e+08	Acetyl [N-Term]
High	High	Master Protein	Q562R1	Beta-actin-like protein 2 OS=Homo sapiens GN=ACTBL2 PE=1 SV=2	0	0	36	9	543	3	1	376	42	5.59	12262	432.93	8	5	0	2.89083e+06	2.67915e+06	2.50559e+06	8.66876e+06	8.21973e+06	5.80909e+06	6.74648e+06	5.40621e+06	7.1464e+06
High	High	Master Protein	Q9UNX4	WD repeat-containing protein 3 OS=Homo sapiens GN=WDR3 PE=1 SV=1	0	0	53	40	436	40	1	943	106	6.64	8876	432.66	40	21	0	2.62337e+08	2.66346e+08	2.63334e+08	2.83607e+08	2.91807e+08	2.9606e+08	306036560	3.03081e+08	3.05219e+08
High	High	Master Protein	Q9NWH9	SAFB-like transcription modulator OS=Homo sapiens GN=SLTM PE=1 SV=2	0	0	49	55	645	55	1	1034	117.1	7.87	18696	432.64	55	18	0	3.21639e+08	3.05824e+08	3.17254e+08	4.12719e+08	4.11508e+08	4.12154e+08	4.67019e+08	4.75268e+08	4.80802e+08	Acetyl [N-Term]
High	High	Master Protein	A1L0T0	Acetolactate synthase-like protein OS=Homo sapiens GN=ILVBL PE=1 SV=2	0	0	51	23	269	23	1	632	67.8	8.15	5258	432.51	23	17	0	1.65415e+08	1.49572e+08	1.65973e+08	2.03138e+08	2.24369e+08	2.00398e+08	2.15646e+08	2.18409e+08	2.15835e+08
High	High	Master Protein	P36873	Serine/threonine-protein phosphatase PP1-gamma catalytic subunit OS=Homo sapiens GN=PPP1CC PE=1 SV=1	0	0	65	18	405	3	1	323	37	6.54	9006	432.45	18	10	0	1.66035e+08	1.66136e+08	170561234	1.67711e+08	1.55951e+08	1.60992e+08	1.91786e+08	1.95886e+08	2.23068e+08
High	High	Master Protein	Q01130	Serine/arginine-rich splicing factor 2 OS=Homo sapiens GN=SRSF2 PE=1 SV=4	0	0	35	10	464	8	1	221	25.5	11.85	14728	431.32	10	3	2	1.22487e+09	1.39113e+09	1.22046e+09	1.93741e+09	1.90776e+09	1.87353e+09	2.03133e+09	1.88939e+09	2.26156e+09	Acetyl [N-Term]
High	High	Master Protein	P06493	Cyclin-dependent kinase 1 OS=Homo sapiens GN=CDK1 PE=1 SV=3	0	0	72	22	368	20	1	297	34.1	8.4	7273	430.73	22	12	1	8.22636e+08	8.19632e+08	9.37657e+08	8.45405e+08	8.97307e+08	8.94895e+08	8.77736e+08	9.27642e+08	9.85134e+08
High	High	Master Protein	P62873	Guanine nucleotide-binding protein G(I)/G(S)/G(T) subunit beta-1 OS=Homo sapiens GN=GNB1 PE=1 SV=3	0	0	69	16	322	9	1	340	37.4	6	7046	430.64	16	8	8	5.92205e+08	5.58057e+08	5.93363e+08	7.7662e+08	8.37343e+08	7.87831e+08	6.81209e+08	7.32278e+08	7.34248e+08	Acetyl [N-Term]
High	High	Master Protein	P49454	Centromere protein F OS=Homo sapiens GN=CENPF PE=1 SV=2	0	0	28	77	456	75	1	3210	367.5	5.07	9517	430.53	76	40	2	8.20702e+07	8.14993e+07	8.80434e+07	1.17595e+08	1.2172e+08	1.20599e+08	1.53482e+08	1.54628e+08	1.5739e+08
High	High	Master Protein	P42224	Signal transducer and activator of transcription 1-alpha/beta OS=Homo sapiens GN=STAT1 PE=1 SV=2	0	0	52	32	410	32	1	750	87.3	6.05	9108	430.04	32	19	0	4.13994e+08	4.2102e+08	4.01903e+08	4.7134e+08	4.98128e+08	4.80835e+08	5.23037e+08	5.3227e+08	5.27059e+08	Acetyl [N-Term]
High	High	Master Protein	O14841	5-oxoprolinase OS=Homo sapiens GN=OPLAH PE=1 SV=3	0	0	34	33	342	33	1	1288	137.4	6.58	8792	429.93	33	18	0	1.28064e+08	1.2723e+08	1.27492e+08	1.8503e+08	1.80569e+08	1.74361e+08	2.19209e+08	2.33077e+08	2.18225e+08
High	High	Master Protein	Q6L8Q7	2',5'-phosphodiesterase 12 OS=Homo sapiens GN=PDE12 PE=1 SV=2	0	0	49	23	321	23	1	609	67.3	6.57	8061	429.32	23	10	0	2.46197e+08	2.19248e+08	2.32185e+08	2.91704e+08	2.87407e+08	2.9055e+08	3.06052e+08	3.19393e+08	3.27891e+08
High	High	Master Protein	Q9UKV8	Protein argonaute-2 OS=Homo sapiens GN=AGO2 PE=1 SV=3	0	0	55	37	365	29	1	859	97.1	9.19	8400	428.27	37	16	9	1.66093e+08	1.6455e+08	1.7494e+08	2.98455e+08	2.95751e+08	3.023e+08	3.33636e+08	3.35969e+08	3.44858e+08	Acetyl [N-Term]
High	High	Master Protein	P12081	Histidine--tRNA ligase, cytoplasmic OS=Homo sapiens GN=HARS PE=1 SV=2	0	0	60	30	426	23	1	509	57.4	5.88	8561	427.22	30	10	7	1.09394e+09	1.05472e+09	1.08947e+09	1.36482e+09	1.4507e+09	1.4748e+09	1.69624e+09	1.76649e+09	1.75444e+09
High	High	None	A6NNZ2	Tubulin beta-8 chain-like protein LOC260334 OS=Homo sapiens PE=1 SV=1	0	0	21	9	1553	0	2	444	49.5	4.86	47401	426.78	9	6	0	1.474e+10	1.41905e+10	1.46724e+10	1.9061e+10	1.69806e+10	1.75382e+10	1.84775e+10	1.79786e+10	17849060800
High	High	Master Protein	P61160	Actin-related protein 2 OS=Homo sapiens GN=ACTR2 PE=1 SV=1	0	0	52	19	388	19	1	394	44.7	6.74	9056	426.7	19	12	0	7.45803e+08	7.29191e+08	7.87829e+08	9.90705e+08	9.66522e+08	1.01365e+09	1.13058e+09	1.08819e+09	1.04285e+09	Acetyl [N-Term]
High	High	Master Protein	O75400	Pre-mRNA-processing factor 40 homolog A OS=Homo sapiens GN=PRPF40A PE=1 SV=2	0	0	38	39	370	37	1	957	108.7	7.56	7104	426.32	39	15	2	5.17829e+08	4.85749e+08	5.17796e+08	6.1639e+08	6.77385e+08	6.19609e+08	6.75897e+08	7.02649e+08	7.69326e+08	Acetyl [N-Term]
High	High	Master Protein Rejected	A6NKT7	RanBP2-like and GRIP domain-containing protein 3 OS=Homo sapiens GN=RGPD3 PE=4 SV=2	0	0	32	51	573	0	0	1758	197.4	6.33	15289	425.7	51	22	0
High	High	Master Protein	O15294	UDP-N-acetylglucosamine--peptide N-acetylglucosaminyltransferase 110 kDa subunit OS=Homo sapiens GN=OGT PE=1 SV=3	0	0	55	45	396	45	1	1046	116.9	6.7	8320	424.91	45	23	0	3.19422e+08	3.21164e+08	3.26752e+08	4.2143e+08	4.30681e+08	4.26107e+08	4.28466e+08	4.21267e+08	4.29614e+08	Acetyl [N-Term]
High	High	Master Protein	Q6PJG6	BRCA1-associated ATM activator 1 OS=Homo sapiens GN=BRAT1 PE=1 SV=2	0	0	60	33	317	33	1	821	88.1	5.27	6999	424.78	29	21	0	1.28169e+08	1.36621e+08	1.4227e+08	1.39566e+08	1.56468e+08	1.51672e+08	1.58041e+08	167290408	1.62065e+08
High	High	Master Protein	P13807	Glycogen [starch] synthase, muscle OS=Homo sapiens GN=GYS1 PE=1 SV=2	0	0	49	26	316	26	1	737	83.7	6.18	6869	424.72	26	14	0	2.0948e+08	2.19169e+08	2.13151e+08	2.7194e+08	2.82984e+08	2.71234e+08	3.10056e+08	3.28055e+08	2.96896e+08
High	High	Master Protein	Q9BPX3	Condensin complex subunit 3 OS=Homo sapiens GN=NCAPG PE=1 SV=1	0	0	42	38	429	38	1	1015	114.3	5.59	10466	424.5	36	17	0	3.33734e+08	3.22957e+08	3.40557e+08	3.17767e+08	3.19651e+08	3.47865e+08	3.31337e+08	3.40973e+08	3.47593e+08
High	High	Master Protein	Q9NVA2	Septin-11 OS=Homo sapiens GN=SEPT11 PE=1 SV=3	0	0	60	27	475	15	1	429	49.4	6.81	9209	424.2	26	13	16	1.1182e+09	1.05116e+09	1.04324e+09	1.28541e+09	1.31588e+09	1.36123e+09	1.51661e+09	1.54166e+09	1.5259e+09	Acetyl [N-Term]
High	High	Master Protein	Q9Y4F5	Centrosomal protein of 170 kDa protein B OS=Homo sapiens GN=CEP170B PE=1 SV=4	0	0	50	51	385	51	1	1589	171.6	6.84	9537	423.81	51	26	0	8.6736e+07	8.5293e+07	9.56942e+07	1.12182e+08	1.15109e+08	1.1029e+08	1.54043e+08	1.45698e+08	1.50847e+08	Acetyl [N-Term]
High	High	Master Protein	Q9Y4W2	Ribosomal biogenesis protein LAS1L OS=Homo sapiens GN=LAS1L PE=1 SV=2	0	0	57	32	331	32	1	734	83	4.73	7940	423.64	32	18	0	1.58623e+08	1.75386e+08	1.75248e+08	2.00831e+08	2.07411e+08	2.11172e+08	2.1357e+08	2.15379e+08	2.22501e+08
High	High	Master Protein	O60884	DnaJ homolog subfamily A member 2 OS=Homo sapiens GN=DNAJA2 PE=1 SV=1	0	0	60	19	359	18	1	412	45.7	6.48	8209	423.18	19	9	1	6.68701e+08	6.37174e+08	7.10874e+08	7.97913e+08	7.61034e+08	8.31715e+08	9.63377e+08	9.69883e+08	9.37909e+08
High	High	Master Protein	Q9UKX7	Nuclear pore complex protein Nup50 OS=Homo sapiens GN=NUP50 PE=1 SV=2	0	0	78	32	411	32	1	468	50.1	7.06	11302	423	31	22	0	3.19191e+08	3.10992e+08	3.20462e+08	4.19329e+08	4.40048e+08	4.33949e+08	4.65428e+08	4.44597e+08	4.48777e+08
High	High	Master Protein	Q5UIP0	Telomere-associated protein RIF1 OS=Homo sapiens GN=RIF1 PE=1 SV=2	0	0	29	56	386	56	1	2472	274.3	5.52	8207	422.81	55	26	0	9.57116e+07	9.83936e+07	9.25466e+07	1.12875e+08	1.03818e+08	1.04133e+08	9.2231e+07	8.75493e+07	9.22669e+07
High	High	Master Protein	Q96P70	Importin-9 OS=Homo sapiens GN=IPO9 PE=1 SV=3	0	0	36	29	432	29	1	1041	115.9	4.81	10102	422.73	28	15	0	6.19507e+08	5.81366e+08	6.21603e+08	6.75942e+08	7.03688e+08	7.29108e+08	7.24861e+08	7.61245e+08	7.77899e+08	Acetyl [N-Term]
High	High	Master Protein	Q13409	Cytoplasmic dynein 1 intermediate chain 2 OS=Homo sapiens GN=DYNC1I2 PE=1 SV=3	0	0	51	23	394	23	1	638	71.4	5.2	9814	422.61	23	15	0	4.01122e+08	3.90727e+08	3.93667e+08	4.16384e+08	4.74999e+08	4.39623e+08	5.39264e+08	5.20937e+08	5.63736e+08
High	High	Master Protein	P42025	Beta-centractin OS=Homo sapiens GN=ACTR1B PE=1 SV=1	0	0	69	22	346	10	1	376	42.3	6.4	7276	421.58	21	8	0	8.18579e+07	7.64465e+07	7.43857e+07	8.60385e+07	8.34462e+07	8.93907e+07	8.98898e+07	8.72549e+07	8.50962e+07	Acetyl [N-Term]
High	High	Master Protein	P11177	Pyruvate dehydrogenase E1 component subunit beta, mitochondrial OS=Homo sapiens GN=PDHB PE=1 SV=3	0	0	63	18	328	18	1	359	39.2	6.65	6721	420.93	18	11	0	5.87552e+08	6.08744e+08	6.35587e+08	5.96433e+08	6.72869e+08	6.25687e+08	8.09564e+08	8.60258e+08	875312835
High	High	Master Protein	O75116	Rho-associated protein kinase 2 OS=Homo sapiens GN=ROCK2 PE=1 SV=4	0	0	45	60	440	54	1	1388	160.8	6.02	8730	420.35	60	24	0	1.52041e+08	1.45374e+08	1.46969e+08	1.71068e+08	1.88025e+08	1.84326e+08	2.18764e+08	2.21562e+08	2.13849e+08	Acetyl [N-Term]
High	High	Master Protein	Q07955	Serine/arginine-rich splicing factor 1 OS=Homo sapiens GN=SRSF1 PE=1 SV=2	0	0	66	24	672	23	1	248	27.7	10.36	17142	420.07	22	12	1	2.18997e+09	1.98327e+09	2.18776e+09	2.55709e+09	2.90426e+09	2.92218e+09	2.7201e+09	2.57245e+09	2.72166e+09	Acetyl [N-Term]
High	High	Master Protein	Q9UN86	Ras GTPase-activating protein-binding protein 2 OS=Homo sapiens GN=G3BP2 PE=1 SV=2	0	0	49	22	366	20	1	482	54.1	5.55	7638	419.5	22	9	2	9.35069e+08	9.91533e+08	1.04455e+09	1.10365e+09	1.05035e+09	1.02761e+09	1.17608e+09	1.25953e+09	1.25353e+09
High	High	Master Protein	Q9Y263	Phospholipase A-2-activating protein OS=Homo sapiens GN=PLAA PE=1 SV=2	0	0	66	48	478	48	1	795	87.1	6.37	11451	419.28	48	20	0	5.35887e+08	5.31142e+08	5.61399e+08	676430261	7.3265e+08	7.16758e+08	8.1594e+08	8.20953e+08	8.39478e+08
High	High	Master Protein	Q9NYB0	Telomeric repeat-binding factor 2-interacting protein 1 OS=Homo sapiens GN=TERF2IP PE=1 SV=1	0	0	64	27	393	27	1	399	44.2	4.73	9504	419.25	27	17	0	1.67391e+08	1.54938e+08	1.59731e+08	2.26722e+08	2.30164e+08	2.27098e+08	2.63659e+08	2.85389e+08	2.90682e+08	Acetyl [N-Term]
High	High	Master Protein	O60271	C-Jun-amino-terminal kinase-interacting protein 4 OS=Homo sapiens GN=SPAG9 PE=1 SV=4	0	0	50	53	446	53	1	1321	146.1	5.15	9453	419.14	52	22	0	2.26492e+08	2.19039e+08	2.27333e+08	2.74882e+08	2.92542e+08	2.80037e+08	3.08601e+08	3.25896e+08	3.44399e+08	Acetyl [N-Term]
High	High	Master Protein	P55084	Trifunctional enzyme subunit beta, mitochondrial OS=Homo sapiens GN=HADHB PE=1 SV=3	0	0	60	24	467	24	1	474	51.3	9.41	9913	418.54	24	13	0	9.18638e+08	9.38855e+08	9.95527e+08	1.14793e+09	1.25814e+09	1.2933e+09	1.48592e+09	1.50858e+09	1.5904e+09
High	High	Master Protein	Q9NZT2	Opioid growth factor receptor OS=Homo sapiens GN=OGFR PE=1 SV=3	0	0	52	25	349	25	1	677	73.3	4.84	9916	418.45	24	15	0	1.43309e+08	1.39496e+08	1.5149e+08	1.66425e+08	1.82256e+08	1.69018e+08	1.96238e+08	2.05663e+08	2.11819e+08
High	High	Master Protein	P46100	Transcriptional regulator ATRX OS=Homo sapiens GN=ATRX PE=1 SV=5	0	0	30	66	471	66	1	2492	282.4	6.58	12264	418.43	65	28	0	1.57443e+08	1.4119e+08	1.61647e+08	2.06065e+08	2.0617e+08	2.12713e+08	2.43418e+08	2.40882e+08	2.4061e+08
High	High	Master Protein	Q2TAY7	WD40 repeat-containing protein SMU1 OS=Homo sapiens GN=SMU1 PE=1 SV=2	0	0	53	22	391	22	1	513	57.5	7.18	8468	418.35	22	10	0	4.94818e+08	4.94288e+08	512017748	6.25181e+08	6.42227e+08	7.09859e+08	6.98526e+08	7.05584e+08	7.216e+08	Acetyl [N-Term]
High	High	Master Protein	Q12959	Disks large homolog 1 OS=Homo sapiens GN=DLG1 PE=1 SV=2	0	0	50	34	318	26	1	904	100.4	5.76	6927	418.12	32	18	8	1.81219e+08	1.85122e+08	1.90524e+08	2.0256e+08	2.06147e+08	1.99104e+08	2.37049e+08	2.25779e+08	2.32879e+08
High	High	Master Protein	Q16576	Histone-binding protein RBBP7 OS=Homo sapiens GN=RBBP7 PE=1 SV=1	0	0	57	21	447	13	1	425	47.8	5.05	10538	418.04	21	9	0	4.28851e+08	4.38833e+08	4.11405e+08	4.37518e+08	4.7667e+08	4.40528e+08	4.6644e+08	4.50474e+08	4.64608e+08
High	High	Master Protein	Q16555	Dihydropyrimidinase-related protein 2 OS=Homo sapiens GN=DPYSL2 PE=1 SV=1	0	0	69	26	343	23	1	572	62.3	6.38	8025	417.93	26	16	4	2.94624e+08	2.87482e+08	2.92662e+08	2.86945e+08	3.12567e+08	3.16397e+08	3.32277e+08	3.24153e+08	3.42356e+08
High	High	Master Protein	O75821	Eukaryotic translation initiation factor 3 subunit G OS=Homo sapiens GN=EIF3G PE=1 SV=2	0	0	66	24	529	24	1	320	35.6	6.13	11733	417.38	24	11	0	1.14383e+09	1.22502e+09	1.21731e+09	1.29125e+09	1.31814e+09	1.29857e+09	1.45626e+09	1.5082e+09	1.46276e+09	Acetyl [N-Term]
High	High	Master Protein	Q92614	Unconventional myosin-XVIIIa OS=Homo sapiens GN=MYO18A PE=1 SV=3	0	0	41	64	390	64	1	2054	233	6.3	9511	417.17	61	24	0	1.29328e+08	1.21071e+08	1.24095e+08	1.31806e+08	1.32698e+08	1.3596e+08	1.63927e+08	1.65596e+08	1.60134e+08
High	High	Master Protein	O60216	Double-strand-break repair protein rad21 homolog OS=Homo sapiens GN=RAD21 PE=1 SV=2	0	0	53	28	354	28	1	631	71.6	4.65	8008	416.37	27	18	0	2.00943e+08	1.8209e+08	1.98235e+08	1.8302e+08	1.91849e+08	1.90322e+08	2.04325e+08	2.10764e+08	2.05272e+08
High	High	Master Protein	P68400	Casein kinase II subunit alpha OS=Homo sapiens GN=CSNK2A1 PE=1 SV=1	0	0	61	24	352	22	1	391	45.1	7.74	6750	415.92	24	12	2	6.9767e+08	7.19831e+08	7.85517e+08	8.05996e+08	8.518e+08	9.07416e+08	9.0119e+08	9.07763e+08	9.04791e+08
High	High	Master Protein	Q14498	RNA-binding protein 39 OS=Homo sapiens GN=RBM39 PE=1 SV=2	0	0	51	24	396	21	1	530	59.3	10.1	10936	415.22	23	12	3	5.6944e+08	5.23403e+08	5.44237e+08	6.78387e+08	6.84625e+08	6.74557e+08	7.48746e+08	7.61118e+08	7.53805e+08	Acetyl [N-Term]
High	High	Master Protein	Q16181	Septin-7 OS=Homo sapiens GN=SEPT7 PE=1 SV=2	0	0	59	26	441	24	1	437	50.6	8.63	9703	415.18	25	15	0	8.21606e+08	8.38234e+08	8.17898e+08	1.00952e+09	1.06977e+09	1.03096e+09	1.02438e+09	1.0393e+09	1.00581e+09
High	High	Master Protein	Q9BXP5	Serrate RNA effector molecule homolog OS=Homo sapiens GN=SRRT PE=1 SV=1	0	0	46	50	532	50	1	876	100.6	5.96	11706	415.05	50	14	0	8.22974e+08	8.18826e+08	8.85719e+08	1.06547e+09	1.07158e+09	1.10143e+09	1.18139e+09	1.25328e+09	1.27982e+09
High	High	Master Protein	Q09472	Histone acetyltransferase p300 OS=Homo sapiens GN=EP300 PE=1 SV=2	0	0	30	56	411	37	1	2414	264	8.5	8876	414.42	52	27	19	1.23191e+08	1.26175e+08	1.36448e+08	1.44234e+08	1.60667e+08	1.66326e+08	1.981e+08	2.06457e+08	2.06701e+08	Acetyl [N-Term]
High	High	Master Protein	O43583	Density-regulated protein OS=Homo sapiens GN=DENR PE=1 SV=2	0	0	54	11	315	11	1	198	22.1	5.3	8779	414.01	10	6	0	2.35999e+08	2.60373e+08	2.33847e+08	2.70574e+08	3.05195e+08	3.31022e+08	4.04409e+08	3.44535e+08	3.36504e+08	Acetyl [N-Term]
High	High	Master Protein	Q14692	Ribosome biogenesis protein BMS1 homolog OS=Homo sapiens GN=BMS1 PE=1 SV=1	0	0	43	47	511	47	1	1282	145.7	6.44	11885	413.98	46	23	0	2.55254e+08	2.49754e+08	2.68261e+08	2.95289e+08	3.23565e+08	3.36181e+08	3.34349e+08	3.45575e+08	3.36701e+08
High	High	Master Protein	P51149	Ras-related protein Rab-7a OS=Homo sapiens GN=RAB7A PE=1 SV=1	0	0	80	19	383	19	1	207	23.5	6.7	8106	413.82	19	9	0	9.65165e+08	9.6011e+08	9.37048e+08	1.10893e+09	1.20031e+09	1.15959e+09	1.36345e+09	1.39044e+09	1.36316e+09
High	High	Master Protein	Q969G3	SWI/SNF-related matrix-associated actin-dependent regulator of chromatin subfamily E member 1 OS=Homo sapiens GN=SMARCE1 PE=1 SV=2	0	0	65	23	315	22	1	411	46.6	4.88	6862	413.8	23	14	0	3.46453e+08	3.752e+08	3.44373e+08	4.69431e+08	4.19011e+08	4.64516e+08	4.94165e+08	4.32615e+08	4.54719e+08
High	High	Master Protein	P22695	Cytochrome b-c1 complex subunit 2, mitochondrial OS=Homo sapiens GN=UQCRC2 PE=1 SV=3	0	0	46	17	357	17	1	453	48.4	8.63	8458	413.54	16	15	0	8.41768e+08	8.35264e+08	8.56047e+08	9.67469e+08	9.80181e+08	9.71277e+08	1.16077e+09	1199402092	1.2734e+09
High	High	Master Protein	O43865	Adenosylhomocysteinase 2 OS=Homo sapiens GN=AHCYL1 PE=1 SV=2	0	0	58	27	444	16	1	530	58.9	6.89	9963	413.44	27	13	11	5.62072e+08	6.00803e+08	5.96029e+08	6.88548e+08	7.07902e+08	7.1063e+08	7.88814e+08	8.56547e+08	8.91218e+08	Acetyl [N-Term]
High	High	Master Protein	Q96AY3	Peptidyl-prolyl cis-trans isomerase FKBP10 OS=Homo sapiens GN=FKBP10 PE=1 SV=1	0	0	53	29	494	29	1	582	64.2	5.62	11755	413.42	29	13	0	6.26137e+08	6.29724e+08	6.40522e+08	8.36646e+08	7.95361e+08	8.18373e+08	896190282	9.86682e+08	9.26449e+08
High	High	Master Protein	Q9H2U1	ATP-dependent RNA helicase DHX36 OS=Homo sapiens GN=DHX36 PE=1 SV=2	0	0	48	40	406	38	1	1008	114.7	7.68	9302	413.42	40	23	2	3.24742e+08	3.04063e+08	3.23568e+08	4.0868e+08	4.38313e+08	4.09834e+08	4.4668e+08	461566889	4.54371e+08	Acetyl [N-Term]
High	High	Master Protein	P11498	Pyruvate carboxylase, mitochondrial OS=Homo sapiens GN=PC PE=1 SV=2	0	0	55	47	440	47	1	1178	129.6	6.84	10805	412.69	47	23	0	3.4327e+08	3.11412e+08	3.25074e+08	4.26549e+08	4.35181e+08	4.1816e+08	5.68341e+08	5.93853e+08	5.84293e+08
High	High	Master Protein	O95782	AP-2 complex subunit alpha-1 OS=Homo sapiens GN=AP2A1 PE=1 SV=3	0	0	55	46	507	37	1	977	107.5	7.03	12040	412.5	45	22	8	7.43519e+08	7.21338e+08	7.46174e+08	9.14982e+08	1.0302e+09	9.93704e+08	1086699196	1.04041e+09	1.11691e+09
High	High	Master Protein	O14964	Hepatocyte growth factor-regulated tyrosine kinase substrate OS=Homo sapiens GN=HGS PE=1 SV=1	0	0	31	21	302	21	1	777	86.1	6.16	6658	412.23	21	8	0	2.76381e+08	2.78801e+08	2.94518e+08	3.13125e+08	3.14506e+08	3.36683e+08	3.41021e+08	3.96381e+08	3.82592e+08
High	High	Master Protein	Q15418	Ribosomal protein S6 kinase alpha-1 OS=Homo sapiens GN=RPS6KA1 PE=1 SV=2	0	0	59	40	383	29	1	735	82.7	7.83	8191	411.76	40	20	12	3.4805e+08	3.22493e+08	3.25853e+08	3.80059e+08	4.18045e+08	4.07126e+08	4.43459e+08	4.89124e+08	5.14587e+08
High	High	Master Protein	Q9Y3I0	tRNA-splicing ligase RtcB homolog OS=Homo sapiens GN=RTCB PE=1 SV=1	0	0	60	26	513	26	1	505	55.2	7.23	12334	411.32	26	13	0	1.35809e+09	1.27868e+09	1.33758e+09	1.55027e+09	1.6674e+09	1.68586e+09	1793794746	1.82433e+09	1.83868e+09
High	High	Master Protein	P61289	Proteasome activator complex subunit 3 OS=Homo sapiens GN=PSME3 PE=1 SV=1	0	0	70	17	370	17	1	254	29.5	5.95	8727	410.89	17	9	0	1.11091e+09	1.07537e+09	1.03327e+09	1.34007e+09	1.42051e+09	1.31169e+09	1.31511e+09	1.29752e+09	1.25091e+09
High	High	Master Protein	Q15046	Lysine--tRNA ligase OS=Homo sapiens GN=KARS PE=1 SV=3	0	0	60	33	482	33	1	597	68	6.35	9746	410.62	32	16	0	1.90435e+09	1.83061e+09	1.85626e+09	2.30712e+09	2.45996e+09	2.4042e+09	2.48582e+09	2.65384e+09	2.57177e+09	Acetyl [N-Term]
High	High	Master Protein	P36507	Dual specificity mitogen-activated protein kinase kinase 2 OS=Homo sapiens GN=MAP2K2 PE=1 SV=1	0	0	62	22	338	15	1	400	44.4	6.55	7940	410.29	22	11	8	4.19016e+08	4.04271e+08	4.09949e+08	5.46264e+08	5.21789e+08	5.60578e+08	5.66793e+08	5.60858e+08	6.26695e+08
High	High	Master Protein	P60900	Proteasome subunit alpha type-6 OS=Homo sapiens GN=PSMA6 PE=1 SV=1	0	0	68	14	411	14	1	246	27.4	6.76	10792	410.07	14	6	0	1.33436e+09	1.33687e+09	1.41416e+09	1.65083e+09	1.95677e+09	1.94206e+09	2075583592	2.23119e+09	2.15863e+09
High	High	Master Protein	Q13155	Aminoacyl tRNA synthase complex-interacting multifunctional protein 2 OS=Homo sapiens GN=AIMP2 PE=1 SV=2	0	0	59	15	372	15	1	320	35.3	8.22	9077	409.97	14	8	0	7.45495e+08	7.13073e+08	7.36559e+08	1.07198e+09	9.66647e+08	1.07572e+09	1.11701e+09	1.13971e+09	1.1535e+09
High	High	Master Protein	Q14966	Zinc finger protein 638 OS=Homo sapiens GN=ZNF638 PE=1 SV=2	0	0	37	57	439	57	1	1978	220.5	6.38	10504	409.44	55	25	0	1.69222e+08	1.64223e+08	1.77014e+08	2.21214e+08	2.26174e+08	2.40648e+08	2.24136e+08	2.35104e+08	2.30383e+08
High	High	Master Protein	O43504	Ragulator complex protein LAMTOR5 OS=Homo sapiens GN=LAMTOR5 PE=1 SV=1	0	0	97	5	224	5	1	91	9.6	4.87	4834	409	5	4	0	2.84637e+08	2.8499e+08	2.63544e+08	3.38798e+08	338092899	3.68395e+08	4.27297e+08	4.05417e+08	4.15506e+08	Acetyl [N-Term]
High	High	Master Protein	Q9BUH6	Protein PAXX OS=Homo sapiens GN=C9orf142 PE=1 SV=2	0	0	71	13	266	13	1	204	21.6	5.48	7632	408.91	13	11	0	1.10581e+08	1.16332e+08	1.09706e+08	1.42014e+08	1.46004e+08	1.48866e+08	1.5973e+08	1.69123e+08	1.75314e+08	Acetyl [N-Term]
High	High	Master Protein	P36957	Dihydrolipoyllysine-residue succinyltransferase component of 2-oxoglutarate dehydrogenase complex, mitochondrial OS=Homo sapiens GN=DLST PE=1 SV=4	0	0	47	19	305	19	1	453	48.7	8.95	6639	408.88	18	11	0	3.39814e+08	3.57269e+08	3.3281e+08	3.84227e+08	424640502	4.13067e+08	5.38412e+08	5.41552e+08	5.87994e+08
High	High	Master Protein	Q8TBA6	Golgin subfamily A member 5 OS=Homo sapiens GN=GOLGA5 PE=1 SV=3	0	0	66	37	362	37	1	731	83	5.83	9146	408.52	37	21	0	2.03364e+08	1.94273e+08	2.01428e+08	2.29966e+08	2.48972e+08	2.56873e+08	2.74779e+08	2.80842e+08	2.71624e+08	Acetyl [N-Term]
High	High	Master Protein	Q08379	Golgin subfamily A member 2 OS=Homo sapiens GN=GOLGA2 PE=1 SV=3	0	0	57	43	378	43	1	1002	113	5.02	8974	408.09	42	29	0	1.62041e+08	1.52847e+08	1.65495e+08	2.02143e+08	2.109e+08	2.08603e+08	2.18431e+08	2.32174e+08	2.44317e+08
High	High	Master Protein	P35637	RNA-binding protein FUS OS=Homo sapiens GN=FUS PE=1 SV=1	0	0	34	18	413	16	1	526	53.4	9.36	10921	407.37	17	12	0	6.39345e+08	7.17403e+08	6.61011e+08	9.51064e+08	9.38571e+08	8.22682e+08	9.69625e+08	8.96845e+08	9.25865e+08
High	High	Master Protein	Q03252	Lamin-B2 OS=Homo sapiens GN=LMNB2 PE=1 SV=4	0	0	71	54	654	50	1	620	69.9	5.59	14568	406.07	53	24	0	8.25774e+08	8.56171e+08	8.97266e+08	1.07664e+09	1.12974e+09	1.16099e+09	1.14252e+09	1.21921e+09	1.2184e+09
High	High	Master Protein	Q2NL82	Pre-rRNA-processing protein TSR1 homolog OS=Homo sapiens GN=TSR1 PE=1 SV=1	0	0	43	29	360	29	1	804	91.8	7.42	7460	405.8	29	16	0	3.03709e+08	3.43589e+08	2.93267e+08	3.53754e+08	3.72976e+08	3.59663e+08	4.14404e+08	4.221e+08	4.24665e+08
High	High	Master Protein	O15042	U2 snRNP-associated SURP motif-containing protein OS=Homo sapiens GN=U2SURP PE=1 SV=2	0	0	49	49	468	47	1	1029	118.2	8.47	9966	405.71	49	23	1	4.91784e+08	4.88629e+08	5.21092e+08	5.7909e+08	6.19273e+08	6.43311e+08	6.48864e+08	6.75377e+08	6.73055e+08
High	High	Master Protein	Q9H6S0	Probable ATP-dependent RNA helicase YTHDC2 OS=Homo sapiens GN=YTHDC2 PE=1 SV=2	0	0	50	55	421	55	1	1430	160.1	8.4	11264	405.69	53	27	0	2.30967e+08	2.24745e+08	2.27759e+08	2.84848e+08	2.85006e+08	2.78589e+08	2.83918e+08	2.92866e+08	2.90218e+08	Acetyl [N-Term; N-Term]
High	High	Master Protein	Q02880	DNA topoisomerase 2-beta OS=Homo sapiens GN=TOP2B PE=1 SV=3	0	0	44	69	532	54	1	1626	183.2	8	11886	405.62	67	28	16	4.00164e+08	3.98215e+08	4.23771e+08	4.65274e+08	4.85833e+08	5.08849e+08	5.81782e+08	5.97805e+08	6.1428e+08
High	High	Master Protein	P28838	Cytosol aminopeptidase OS=Homo sapiens GN=LAP3 PE=1 SV=3	0	0	62	28	429	28	1	519	56.1	7.93	10255	405.48	28	14	0	5.57427e+08	5.51682e+08	5.77841e+08	6.38988e+08	6.71512e+08	6.35298e+08	7.43921e+08	7.62868e+08	7.16625e+08
High	High	Master Protein	O15131	Importin subunit alpha-6 OS=Homo sapiens GN=KPNA5 PE=1 SV=2	0	0	35	17	276	4	1	536	60.3	5.16	6030	405.32	17	11	0	4.41756e+06	4.36859e+06	4.76838e+06	3.35734e+06	3.92672e+06	4.07613e+06	4.69732e+06	4.71211e+06	5.42695e+06
High	High	Master Protein	P62333	26S protease regulatory subunit 10B OS=Homo sapiens GN=PSMC6 PE=1 SV=1	0	0	66	24	465	24	1	389	44.1	7.49	11971	405.1	24	10	0	1.15576e+09	1.10625e+09	1.21135e+09	1.52678e+09	1571183807	1.68465e+09	1.70501e+09	1.62267e+09	1.75163e+09
High	High	Master Protein	Q8N0W3	L-fucose kinase OS=Homo sapiens GN=FUK PE=2 SV=2	0	0	34	26	259	26	1	1084	117.5	6.25	5236	405.05	26	15	0	9.08611e+07	8.95002e+07	8.69742e+07	1.22797e+08	1.31571e+08	1.39675e+08	1.36016e+08	1.34799e+08	1.4405e+08
High	High	Master Protein Rejected	Q7Z3J3	RanBP2-like and GRIP domain-containing protein 4 OS=Homo sapiens GN=RGPD4 PE=2 SV=3	0	0	29	45	531	0	0	1758	197.2	6.27	14565	404.85	45	22	0
High	High	Master Protein	O43264	Centromere/kinetochore protein zw10 homolog OS=Homo sapiens GN=ZW10 PE=1 SV=3	0	0	57	36	373	36	1	779	88.8	6.27	9133	404.75	36	20	0	3.05947e+08	2.98752e+08	3.1684e+08	3.22987e+08	3.54723e+08	3.46417e+08	4.05212e+08	4.23269e+08	4.20937e+08	Acetyl [N-Term]
High	High	Master Protein	P05091	Aldehyde dehydrogenase, mitochondrial OS=Homo sapiens GN=ALDH2 PE=1 SV=2	0	0	62	27	392	24	1	517	56.3	7.05	8865	404.75	27	17	1	4.50376e+08	4.27248e+08	4.2862e+08	5.65673e+08	6.011e+08	5.75438e+08	7.06304e+08	7.77838e+08	7.36619e+08
High	High	Master Protein	P54278	Mismatch repair endonuclease PMS2 OS=Homo sapiens GN=PMS2 PE=1 SV=2	0	0	50	36	334	31	1	862	95.7	6.86	7388	404.09	35	20	6	1.56188e+08	1.408e+08	1.51258e+08	1.79882e+08	1.99753e+08	1.96034e+08	1.75791e+08	1.91258e+08	2.03426e+08
High	High	Master Protein	Q9BTE6	Alanyl-tRNA editing protein Aarsd1 OS=Homo sapiens GN=AARSD1 PE=1 SV=2	0	0	74	23	296	23	1	412	45.5	6.42	5741	403.87	22	14	0	2.51917e+08	2.46813e+08	2.61834e+08	3.17181e+08	3.18831e+08	3.16686e+08	3.38174e+08	3.3176e+08	3.26766e+08
High	High	Master Protein	Q9NQR4	Omega-amidase NIT2 OS=Homo sapiens GN=NIT2 PE=1 SV=1	0	0	81	18	381	18	1	276	30.6	7.21	8234	403.79	18	13	0	5.37493e+08	5.07741e+08	5.84994e+08	6.66366e+08	7.07923e+08	7.42236e+08	7.92215e+08	7.79315e+08	7.94584e+08
High	High	Master Protein	P30048	Thioredoxin-dependent peroxide reductase, mitochondrial OS=Homo sapiens GN=PRDX3 PE=1 SV=3	0	0	55	10	297	10	1	256	27.7	7.78	6968	403.59	10	5	0	1.60278e+09	1.53698e+09	1.5086e+09	1913923683	2.08423e+09	1.76503e+09	2.41355e+09	2.12929e+09	2.28656e+09
High	High	Master Protein	Q15369	Elongin-C OS=Homo sapiens GN=ELOC PE=1 SV=1	0	0	66	7	275	7	1	112	12.5	4.78	7458	403.39	7	2	0	7.36358e+08	7.39501e+08	7.73149e+08	9.87385e+08	9.54674e+08	9.59256e+08	1.21388e+09	1.09388e+09	1.26445e+09
High	High	Master Protein	Q6PD62	RNA polymerase-associated protein CTR9 homolog OS=Homo sapiens GN=CTR9 PE=1 SV=1	0	0	41	38	377	38	1	1173	133.4	6.77	8776	403.3	38	17	0	2.79798e+08	2.89838e+08	2.80927e+08	3.43349e+08	3.52486e+08	3.41747e+08	3.04145e+08	3.34625e+08	3.32847e+08
High	High	Master Protein	P62820	Ras-related protein Rab-1A OS=Homo sapiens GN=RAB1A PE=1 SV=3	0	0	78	18	400	10	1	205	22.7	6.21	9022	403.19	16	9	0	2.57111e+08	2.22547e+08	2.40593e+08	3.02989e+08	3.1062e+08	2.85776e+08	3.49427e+08	3.79211e+08	3.80006e+08	Acetyl [N-Term]
High	High	Master Protein	Q8NCA5	Protein FAM98A OS=Homo sapiens GN=FAM98A PE=1 SV=1	0	0	39	14	249	12	1	519	55.4	9.03	5404	402.87	14	12	1	1.15822e+09	1.0699e+09	1.13011e+09	1.13448e+09	1.11367e+09	1.10996e+09	1.82531e+09	1.25951e+09	1.48648e+09
High	High	Master Protein	P49750	YLP motif-containing protein 1 OS=Homo sapiens GN=YLPM1 PE=1 SV=3	0	0	43	64	522	64	1	1951	219.8	6.57	11649	402.68	63	27	0	4.43529e+08	4.21968e+08	4.55372e+08	5.13454e+08	5.19867e+08	5.41187e+08	5.67145e+08	6.04254e+08	5.98724e+08	Acetyl [N-Term]
High	High	Master Protein	Q6WCQ1	Myosin phosphatase Rho-interacting protein OS=Homo sapiens GN=MPRIP PE=1 SV=3	0	0	60	49	379	48	1	1025	116.5	6.21	9303	402.06	48	22	1	1.4677e+08	1.42119e+08	1.43595e+08	1.52563e+08	1.57273e+08	1.50721e+08	1.75112e+08	1.82325e+08	1.78041e+08
High	High	Master Protein	P23786	Carnitine O-palmitoyltransferase 2, mitochondrial OS=Homo sapiens GN=CPT2 PE=1 SV=2	0	0	52	31	425	31	1	658	73.7	8.18	9040	401.67	31	16	0	5.38378e+08	5.34668e+08	5.56358e+08	6.75023e+08	7.15406e+08	7.23376e+08	9.77989e+08	9.81076e+08	9.9675e+08
High	High	Master Protein	Q8N766	ER membrane protein complex subunit 1 OS=Homo sapiens GN=EMC1 PE=1 SV=1	0	0	45	36	421	36	1	993	111.7	7.66	9883	400.88	36	18	0	2.73261e+08	2.84028e+08	2.65293e+08	3.44769e+08	3.39784e+08	3.37269e+08	3.85627e+08	3.98117e+08	4.26366e+08
High	High	Master Protein	Q15042	Rab3 GTPase-activating protein catalytic subunit OS=Homo sapiens GN=RAB3GAP1 PE=1 SV=3	0	0	45	35	365	35	1	981	110.5	5.55	8041	400.68	35	19	0	1.78641e+08	1.62805e+08	1.78074e+08	2.14656e+08	2.24296e+08	2.28301e+08	2.55236e+08	2.62496e+08	2.60409e+08
High	High	Master Protein	O15230	Laminin subunit alpha-5 OS=Homo sapiens GN=LAMA5 PE=1 SV=8	0	0	27	64	380	63	1	3695	399.5	7.02	8946	400.11	62	31	1	7.08462e+07	7.03699e+07	6.89695e+07	7.87221e+07	8.34773e+07	8.42719e+07	9.49326e+07	9.48166e+07	9.77107e+07
High	High	Master Protein	P31153	S-adenosylmethionine synthase isoform type-2 OS=Homo sapiens GN=MAT2A PE=1 SV=1	0	0	55	20	386	18	1	395	43.6	6.48	8989	400.08	20	10	2	8.39858e+08	8.65517e+08	8.7135e+08	1.19038e+09	1.0927e+09	1.22387e+09	1.20524e+09	1.17036e+09	1.18955e+09
High	High	Master Protein	P24534	Elongation factor 1-beta OS=Homo sapiens GN=EEF1B2 PE=1 SV=3	0	0	68	14	375	11	1	225	24.7	4.67	9210	399	14	6	0	1.29139e+09	1.34851e+09	1.47487e+09	1.80301e+09	1.97945e+09	2.00657e+09	2.16951e+09	2.28247e+09	2.14185e+09
High	High	Master Protein	P19174	1-phosphatidylinositol 4,5-bisphosphate phosphodiesterase gamma-1 OS=Homo sapiens GN=PLCG1 PE=1 SV=1	0	0	43	44	395	44	1	1290	148.4	6.05	9099	398.92	44	22	0	1.9927e+08	1.90507e+08	2.03192e+08	211275648	2.2598e+08	2.38011e+08	2.53385e+08	2.85765e+08	2.93682e+08	Acetyl [N-Term]
High	High	Master Protein	P00966	Argininosuccinate synthase OS=Homo sapiens GN=ASS1 PE=1 SV=2	0	0	51	21	351	21	1	412	46.5	8.02	7805	398.5	21	9	0	6.39124e+08	6.72683e+08	7.27476e+08	8.50632e+08	8.96602e+08	8.8709e+08	9.76162e+08	9.85819e+08	1.07903e+09
High	High	Master Protein	Q9BZE4	Nucleolar GTP-binding protein 1 OS=Homo sapiens GN=GTPBP4 PE=1 SV=3	0	0	56	40	462	40	1	634	73.9	9.5	9725	397.72	40	16	0	5.7127e+08	5.80452e+08	6.29368e+08	7.79074e+08	7.756e+08	8.09408e+08	8.1168e+08	8.92732e+08	9.42211e+08
High	High	Master Protein	Q13126	S-methyl-5'-thioadenosine phosphorylase OS=Homo sapiens GN=MTAP PE=1 SV=2	0	0	89	23	339	23	1	283	31.2	7.18	7367	397.56	23	13	0	4.33632e+08	4.28501e+08	4.58678e+08	5.16923e+08	5.30875e+08	5.50855e+08	5.48021e+08	6.1143e+08	5.92512e+08	Acetyl [N-Term]
High	High	Master Protein	P21359	Neurofibromin OS=Homo sapiens GN=NF1 PE=1 SV=2	0	0	30	67	449	67	1	2839	319.2	7.39	10328	396.14	67	26	0	1.79912e+08	1.82894e+08	1.85377e+08	1.6654e+08	1.76514e+08	1.79081e+08	2.18027e+08	2.12261e+08	2.19221e+08	Acetyl [N-Term]
High	High	Master Protein	Q8TD19	Serine/threonine-protein kinase Nek9 OS=Homo sapiens GN=NEK9 PE=1 SV=2	0	0	58	41	415	41	1	979	107.1	5.74	10344	395.63	40	22	0	3.21419e+08	3.09931e+08	3.31203e+08	4.04406e+08	3.87687e+08	3.77906e+08	4.11196e+08	4.40551e+08	4.3265e+08
High	High	Master Protein	Q04323	UBX domain-containing protein 1 OS=Homo sapiens GN=UBXN1 PE=1 SV=2	0	0	64	25	329	25	1	297	33.3	5.25	8456	395.5	25	13	0	2.71525e+08	2.63816e+08	2.77238e+08	3.2033e+08	3.70291e+08	3.45259e+08	3.58329e+08	3.77205e+08	3.93264e+08	Acetyl [N-Term]
High	High	Master Protein	Q15008	26S proteasome non-ATPase regulatory subunit 6 OS=Homo sapiens GN=PSMD6 PE=1 SV=1	0	0	63	30	518	30	1	389	45.5	5.62	11729	395.19	30	11	0	1.28295e+09	1.16172e+09	1.30971e+09	1.58853e+09	1.60961e+09	1.6952e+09	1.55346e+09	1.68131e+09	1.7389e+09
High	High	Master Protein	Q99614	Tetratricopeptide repeat protein 1 OS=Homo sapiens GN=TTC1 PE=1 SV=1	0	0	75	18	354	18	1	292	33.5	4.84	7761	394.81	18	9	0	2.06983e+08	2.00628e+08	1.91526e+08	2.86511e+08	3.04934e+08	3.08854e+08	3.37089e+08	3.35423e+08	3.65452e+08
High	High	Master Protein	P55263	Adenosine kinase OS=Homo sapiens GN=ADK PE=1 SV=2	0	0	73	22	382	22	1	362	40.5	6.7	9142	394.49	21	10	0	6.44464e+08	6.24869e+08	6.7545e+08	7.23535e+08	7.76034e+08	7.69315e+08	7.64712e+08	9.57501e+08	9.60895e+08	Acetyl [N-Term]
High	High	Master Protein	Q9P260	LisH domain and HEAT repeat-containing protein KIAA1468 OS=Homo sapiens GN=KIAA1468 PE=1 SV=2	0	0	45	42	355	42	1	1216	134.5	5.45	8312	394.38	42	24	0	2.90907e+08	2.60542e+08	2.75601e+08	2.86252e+08	2.86528e+08	2.9897e+08	2.9774e+08	3.03782e+08	3.50467e+08
High	High	Master Protein	O00264	Membrane-associated progesterone receptor component 1 OS=Homo sapiens GN=PGRMC1 PE=1 SV=3	0	0	59	11	289	10	1	195	21.7	4.7	8966	394	11	6	0	1.74893e+08	1.82364e+08	1.83837e+08	2.31569e+08	2.23494e+08	2.19569e+08	2.48814e+08	2.53005e+08	2.54234e+08
High	High	Master Protein	O00151	PDZ and LIM domain protein 1 OS=Homo sapiens GN=PDLIM1 PE=1 SV=4	0	0	83	19	307	19	1	329	36	7.02	6317	393.85	19	11	0	3.13128e+08	310534350	2.99301e+08	3.63836e+08	3.72456e+08	3.87984e+08	4.19763e+08	4.28954e+08	4.36696e+08	Acetyl [N-Term]
High	High	Master Protein	Q9NVI7	ATPase family AAA domain-containing protein 3A OS=Homo sapiens GN=ATAD3A PE=1 SV=2	0	0	54	37	478	15	1	634	71.3	8.98	9431	393.54	37	16	22	5.93516e+08	5.62922e+08	5.93856e+08	6.49658e+08	7.16767e+08	7.00858e+08	9.52369e+08	9.19411e+08	9.17568e+08	Acetyl [N-Term]
High	High	Master Protein	Q14914	Prostaglandin reductase 1 OS=Homo sapiens GN=PTGR1 PE=1 SV=2	0	0	52	14	338	14	1	329	35.8	8.29	7577	392.91	14	9	0	3.94356e+08	3.98446e+08	4.26613e+08	5.13198e+08	5.36104e+08	5.60569e+08	5.88197e+08	5.8934e+08	6.05781e+08
High	High	Master Protein	Q15435	Protein phosphatase 1 regulatory subunit 7 OS=Homo sapiens GN=PPP1R7 PE=1 SV=1	0	0	64	23	338	23	1	360	41.5	4.91	9444	392.82	23	9	0	3.24615e+08	3.44321e+08	3.59134e+08	3.98315e+08	3.76212e+08	3.63962e+08	4.70273e+08	4.6958e+08	4.86705e+08
High	High	Master Protein	Q92609	TBC1 domain family member 5 OS=Homo sapiens GN=TBC1D5 PE=1 SV=1	0	0	46	26	261	26	1	795	88.9	6.54	5384	392.19	26	16	0	1.40185e+08	1.48911e+08	1.48095e+08	1.43465e+08	1.5929e+08	1.53936e+08	1.01959e+08	1.11566e+08	1.18204e+08	Acetyl [N-Term]
High	High	Master Protein	Q9UI10	Translation initiation factor eIF-2B subunit delta OS=Homo sapiens GN=EIF2B4 PE=1 SV=2	0	0	51	19	320	19	1	523	57.5	9.38	7308	391.87	19	11	0	1.11802e+08	1.29126e+08	1.17869e+08	1.81387e+08	1.98657e+08	1.95894e+08	2.07432e+08	2.22624e+08	2.06715e+08
High	High	Master Protein	P47756	F-actin-capping protein subunit beta OS=Homo sapiens GN=CAPZB PE=1 SV=4	0	0	54	15	519	15	1	277	31.3	5.59	13864	391.83	14	9	0	1.02412e+09	1.05582e+09	1.07733e+09	1.04385e+09	1.20775e+09	1.17941e+09	1.32664e+09	1.26448e+09	1.29922e+09	Acetyl [N-Term]
High	High	Master Protein	Q9NU22	Midasin OS=Homo sapiens GN=MDN1 PE=1 SV=2	0	0	23	93	450	92	1	5596	632.4	5.68	9841	391.81	88	36	1	1.27826e+08	1.1897e+08	1.23525e+08	1.14322e+08	1.20015e+08	1.1658e+08	1.33612e+08	1.36194e+08	1.37007e+08
High	High	Master Protein	Q12789	General transcription factor 3C polypeptide 1 OS=Homo sapiens GN=GTF3C1 PE=1 SV=4	0	0	39	61	401	61	1	2109	238.7	7.3	9086	390.8	60	22	0	1.81025e+08	1.85305e+08	1.83731e+08	1.83357e+08	2.00951e+08	2.02325e+08	2.25051e+08	2.25347e+08	2.35508e+08
High	High	Master Protein	Q8WYP5	Protein ELYS OS=Homo sapiens GN=AHCTF1 PE=1 SV=3	0	0	38	64	407	64	1	2266	252.3	6.6	9713	390.4	62	31	0	1.16931e+08	1.17226e+08	1.24753e+08	1.32359e+08	1.40343e+08	1.51165e+08	1.58453e+08	1.71371e+08	1.72269e+08
High	High	Master Protein	P21397	Amine oxidase [flavin-containing] A OS=Homo sapiens GN=MAOA PE=1 SV=1	0	0	53	23	384	20	1	527	59.6	7.85	10190	390.09	23	10	3	1.01924e+09	1.02781e+09	9.92874e+08	1.28457e+09	1.36986e+09	1.31244e+09	1.63329e+09	1.53679e+09	1.63219e+09
High	High	Master Protein	Q99590	Protein SCAF11 OS=Homo sapiens GN=SCAF11 PE=1 SV=2	0	0	37	38	368	38	1	1463	164.6	8.41	9267	389.95	36	21	0	1.89206e+08	1.84798e+08	2.03495e+08	2.44752e+08	2.64418e+08	2.59384e+08	2.6996e+08	2.95147e+08	3.12182e+08
High	High	Master Protein	Q8NBS9	Thioredoxin domain-containing protein 5 OS=Homo sapiens GN=TXNDC5 PE=1 SV=2	0	0	52	19	351	19	1	432	47.6	5.97	8296	389.56	19	7	0	9.32199e+08	8.53442e+08	9.22641e+08	1.02581e+09	1.05361e+09	1.0237e+09	1.0149e+09	1.11405e+09	1.06368e+09
High	High	Master Protein	P12955	Xaa-Pro dipeptidase OS=Homo sapiens GN=PEPD PE=1 SV=3	0	0	49	18	330	18	1	493	54.5	6	9193	389.29	18	7	0	2.7168e+08	2.47633e+08	2.59073e+08	3.20532e+08	3.27319e+08	3.1581e+08	3.42867e+08	3.43155e+08	3.42256e+08	Acetyl [N-Term]
High	High	Master Protein	Q15717	ELAV-like protein 1 OS=Homo sapiens GN=ELAVL1 PE=1 SV=2	0	0	56	17	348	15	1	326	36.1	9.17	7604	389.15	17	9	1	1267192575	1.20808e+09	1.25501e+09	1467925909	1.49599e+09	1.43695e+09	1.6232e+09	1.49369e+09	1.70583e+09	Acetyl [N-Term]
High	High	Master Protein	Q9UQB8	Brain-specific angiogenesis inhibitor 1-associated protein 2 OS=Homo sapiens GN=BAIAP2 PE=1 SV=1	0	0	69	35	382	35	1	552	60.8	8.9	9019	388.98	35	14	0	4.25103e+08	4.26317e+08	4.46496e+08	5.9164e+08	5.80587e+08	5.7694e+08	6.04432e+08	6.26123e+08	5.92367e+08
High	High	Master Protein	Q86UK7	E3 ubiquitin-protein ligase ZNF598 OS=Homo sapiens GN=ZNF598 PE=1 SV=1	0	0	65	45	365	45	1	904	98.6	8.4	8682	388.7	45	17	0	2.26117e+08	2.26208e+08	2.3714e+08	3.00128e+08	3.13816e+08	3.13662e+08	2.34072e+08	2.38727e+08	2.42654e+08	Acetyl [N-Term]
High	High	Master Protein	P23368	NAD-dependent malic enzyme, mitochondrial OS=Homo sapiens GN=ME2 PE=1 SV=1	0	0	58	28	314	28	1	584	65.4	7.61	7612	388.15	27	14	0	3.71648e+08	3.78236e+08	4.02016e+08	4.65282e+08	4.74104e+08	4.88173e+08	5.81153e+08	6.27267e+08	6.42741e+08
High	High	Master Protein	P11766	Alcohol dehydrogenase class-3 OS=Homo sapiens GN=ADH5 PE=1 SV=4	0	0	52	16	297	16	1	374	39.7	7.49	7633	388.09	16	8	0	8.81137e+08	9.43719e+08	9.00719e+08	9.15118e+08	9.25769e+08	9.53762e+08	1.00238e+09	1.12802e+09	1.11445e+09
High	High	Master Protein	Q9BZZ5	Apoptosis inhibitor 5 OS=Homo sapiens GN=API5 PE=1 SV=3	0	0	54	27	382	27	1	524	59	7.34	9131	387.95	27	14	0	5.55843e+08	5.21364e+08	5.36158e+08	6.63995e+08	6.61911e+08	6.53955e+08	7.27564e+08	7.42582e+08	6.92704e+08
High	High	Master Protein	P62829	60S ribosomal protein L23 OS=Homo sapiens GN=RPL23 PE=1 SV=1	0	0	51	8	287	8	1	140	14.9	10.51	6843	387.52	8	3	0	1.16079e+09	9.49527e+08	1.02047e+09	1.73695e+09	1.60707e+09	1.65057e+09	1.78959e+09	1.62566e+09	1.72074e+09
High	High	Master Protein	Q92688	Acidic leucine-rich nuclear phosphoprotein 32 family member B OS=Homo sapiens GN=ANP32B PE=1 SV=1	0	0	39	10	296	6	1	251	28.8	4.06	6622	387.2	10	5	0	1.00053e+09	1.02235e+09	1.20372e+09	1.32735e+09	1.38795e+09	1.43659e+09	1.31692e+09	1.423e+09	1.30146e+09
High	High	Master Protein	Q9NVP1	ATP-dependent RNA helicase DDX18 OS=Homo sapiens GN=DDX18 PE=1 SV=2	0	0	56	33	458	33	1	670	75.4	9.5	11954	387.1	33	16	0	3.95252e+08	3.60485e+08	3.74478e+08	5.20761e+08	5.40672e+08	5.60295e+08	5.28818e+08	5.60734e+08	5.31874e+08
High	High	Master Protein	Q02878	60S ribosomal protein L6 OS=Homo sapiens GN=RPL6 PE=1 SV=3	0	0	54	23	464	23	1	288	32.7	10.58	9910	386.87	23	6	0	3.84307e+09	3.7607e+09	3.60994e+09	5.9501e+09	5.66565e+09	6.48444e+09	5.67597e+09	6.88112e+09	6.51996e+09
High	High	Master Protein	Q9NUQ8	ATP-binding cassette sub-family F member 3 OS=Homo sapiens GN=ABCF3 PE=1 SV=2	0	0	56	33	384	33	1	709	79.7	6.34	8696	386.86	32	16	0	3.75633e+08	3.33908e+08	3.26392e+08	4.76093e+08	4.65666e+08	4.68206e+08	5.2784e+08	5.25361e+08	5.29794e+08	Acetyl [N-Term]
High	High	Master Protein	O15143	Actin-related protein 2/3 complex subunit 1B OS=Homo sapiens GN=ARPC1B PE=1 SV=3	0	0	50	15	262	14	1	372	40.9	8.35	5698	386.31	15	10	0	270013589	2.74814e+08	2.99573e+08	3.58915e+08	3.61501e+08	3.73476e+08	3.70649e+08	4.16965e+08	4.01163e+08	Acetyl [N-Term]
High	High	Master Protein	P22033	Methylmalonyl-CoA mutase, mitochondrial OS=Homo sapiens GN=MUT PE=1 SV=4	0	0	47	30	326	30	1	750	83.1	6.93	7376	386.04	30	16	0	1.95824e+08	2.04922e+08	2.20711e+08	2.59992e+08	2.55486e+08	2.67231e+08	3.34627e+08	3.55086e+08	3.61323e+08
High	High	Master Protein	Q9BUQ8	Probable ATP-dependent RNA helicase DDX23 OS=Homo sapiens GN=DDX23 PE=1 SV=3	0	0	54	50	483	50	1	820	95.5	9.55	10923	385.49	49	21	0	5.30217e+08	4.95254e+08	5.29705e+08	5.73578e+08	5.74067e+08	6.0361e+08	6.07446e+08	6.60975e+08	6.66113e+08
High	High	Master Protein	Q9HC38	Glyoxalase domain-containing protein 4 OS=Homo sapiens GN=GLOD4 PE=1 SV=1	0	0	57	16	276	16	1	313	34.8	5.6	6328	385.31	15	9	0	4.29358e+08	4.15912e+08	4.1188e+08	4.96266e+08	5.06852e+08	4.95897e+08	657685641	7.23445e+08	6.93162e+08
High	High	Master Protein	Q9H6S3	Epidermal growth factor receptor kinase substrate 8-like protein 2 OS=Homo sapiens GN=EPS8L2 PE=1 SV=2	0	0	53	28	317	28	1	715	80.6	6.84	6137	385.26	28	15	0	2.11557e+08	2.06632e+08	2.09498e+08	2.40433e+08	2.62496e+08	2.49802e+08	2.64997e+08	2.65055e+08	2.52386e+08	Acetyl [N-Term]
High	High	Master Protein	Q9UIQ6	Leucyl-cystinyl aminopeptidase OS=Homo sapiens GN=LNPEP PE=1 SV=3	0	0	34	26	323	26	1	1025	117.3	5.73	7009	385.05	26	14	0	1.89998e+08	1.91541e+08	2.00315e+08	1.93816e+08	2.09828e+08	1.91257e+08	2.2478e+08	2.23917e+08	2.31326e+08
High	High	Master Protein	P54802	Alpha-N-acetylglucosaminidase OS=Homo sapiens GN=NAGLU PE=1 SV=2	0	0	43	24	290	23	1	743	82.2	6.65	7181	384.87	22	17	1	1.46017e+08	1.43354e+08	1.61373e+08	1.76939e+08	1.75986e+08	1.96702e+08	2.21991e+08	2.30523e+08	2.23039e+08
High	High	Master Protein	Q9UPN4	Centrosomal protein of 131 kDa OS=Homo sapiens GN=CEP131 PE=1 SV=3	0	0	56	59	397	59	1	1083	122.1	8.69	9806	384.82	57	26	0	1.69786e+08	1.74886e+08	1.78344e+08	1.74707e+08	1.83905e+08	1.95514e+08	2.11733e+08	2.20751e+08	2.16064e+08
High	High	Master Protein	Q9P2M7	Cingulin OS=Homo sapiens GN=CGN PE=1 SV=2	0	0	49	54	429	52	1	1197	136.3	5.54	10495	384.11	54	19	2	2.09828e+08	1.98991e+08	2.09224e+08	2.27381e+08	2.57242e+08	2.53798e+08	2.63525e+08	2.8904e+08	2.78356e+08
High	High	Master Protein	Q9UGV2	Protein NDRG3 OS=Homo sapiens GN=NDRG3 PE=1 SV=2	0	0	66	17	278	17	1	375	41.4	5.31	6787	384.09	17	13	0	2.66745e+08	2.5895e+08	2.48241e+08	3.5036e+08	3.81008e+08	3.40337e+08	3.48804e+08	3.18248e+08	3.56815e+08	Acetyl [N-Term]
High	High	Master Protein	Q96IZ0	PRKC apoptosis WT1 regulator protein OS=Homo sapiens GN=PAWR PE=1 SV=1	0	0	53	15	271	14	1	340	36.5	5.41	5353	383.94	15	11	1	1.10829e+08	1.21247e+08	1.17318e+08	1.71573e+08	1.63539e+08	1.61578e+08	1.98415e+08	1.96911e+08	2.08409e+08
High	High	Master Protein	O95671	N-acetylserotonin O-methyltransferase-like protein OS=Homo sapiens GN=ASMTL PE=1 SV=3	0	0	46	24	337	24	1	621	68.8	6.07	8276	383.78	24	12	0	2.51492e+08	2.55687e+08	2.65312e+08	3.65663e+08	3.84464e+08	3.77387e+08	3.79961e+08	4.06888e+08	4.1605e+08
High	High	Master Protein	A6NKD9	Coiled-coil domain-containing protein 85C OS=Homo sapiens GN=CCDC85C PE=1 SV=1	0	0	53	17	254	17	1	419	45.2	6.96	6761	383.22	17	6	0	8.12343e+07	8.39008e+07	9.33605e+07	1.1094e+08	1.2585e+08	1.13858e+08	1.19949e+08	1.2302e+08	1.23176e+08
High	High	Master Protein	Q9H4A3	Serine/threonine-protein kinase WNK1 OS=Homo sapiens GN=WNK1 PE=1 SV=2	0	0	26	46	402	37	1	2382	250.6	6.34	8307	382.93	45	20	8	1.91006e+08	1.85411e+08	1.96876e+08	2.43542e+08	2.51073e+08	2.2385e+08	2.39475e+08	2.64923e+08	2.63834e+08
High	High	Master Protein	P60228	Eukaryotic translation initiation factor 3 subunit E OS=Homo sapiens GN=EIF3E PE=1 SV=1	0	0	70	28	510	28	1	445	52.2	6.04	12449	382.66	27	10	0	1.34685e+09	1.26528e+09	1.44021e+09	1.68666e+09	1.76561e+09	1.76869e+09	1.77553e+09	1.91725e+09	2.03496e+09	Acetyl [N-Term]
High	High	Master Protein	P08195	4F2 cell-surface antigen heavy chain OS=Homo sapiens GN=SLC3A2 PE=1 SV=3	0	0	43	23	295	23	1	630	68	5.01	6694	382.4	22	14	0	2.64561e+08	2.68118e+08	2.63542e+08	4.2187e+08	4.07417e+08	4.3561e+08	4.81918e+08	4.85855e+08	4.96636e+08	Acetyl [N-Term]
High	High	Master Protein	Q9BS26	Endoplasmic reticulum resident protein 44 OS=Homo sapiens GN=ERP44 PE=1 SV=1	0	0	51	19	305	18	1	406	46.9	5.26	6471	382.12	19	12	0	6.81985e+08	6.73552e+08	6.51832e+08	7.33699e+08	6.92799e+08	689016451	9.20058e+08	8.9578e+08	9.10416e+08
High	High	Master Protein	Q96CS3	FAS-associated factor 2 OS=Homo sapiens GN=FAF2 PE=1 SV=2	0	0	53	24	286	24	1	445	52.6	5.62	6551	381.38	24	11	0	3.09877e+08	2.92767e+08	2.86281e+08	4.66817e+08	4.40614e+08	4.7327e+08	3.34722e+08	3.26334e+08	3.22975e+08	Acetyl [N-Term]
High	High	Master Protein	Q07020	60S ribosomal protein L18 OS=Homo sapiens GN=RPL18 PE=1 SV=2	0	0	44	12	386	12	1	188	21.6	11.72	10566	381.37	12	6	0	2.30832e+09	2.33458e+09	2.35345e+09	2.75152e+09	2.91717e+09	2.81863e+09	2.77438e+09	2.94155e+09	3.02557e+09
High	High	Master Protein	O75822	Eukaryotic translation initiation factor 3 subunit J OS=Homo sapiens GN=EIF3J PE=1 SV=2	0	0	66	21	378	21	1	258	29	4.83	8766	380.48	21	14	0	7.14063e+08	6.82012e+08	7.07545e+08	7.28685e+08	8.23426e+08	6.83969e+08	9.15084e+08	1.0113e+09	9.75544e+08	Acetyl [N-Term]
High	High	Master Protein	Q96QC0	Serine/threonine-protein phosphatase 1 regulatory subunit 10 OS=Homo sapiens GN=PPP1R10 PE=1 SV=1	0	0	47	37	405	37	1	940	99	9.17	8902	380.39	35	13	0	3.15078e+08	3.22852e+08	3.21484e+08	3.66872e+08	3.66991e+08	3.67497e+08	4.20257e+08	4.21815e+08	4.26736e+08	Acetyl [N-Term]
High	High	Master Protein	Q9Y4W6	AFG3-like protein 2 OS=Homo sapiens GN=AFG3L2 PE=1 SV=2	0	0	56	45	420	45	1	797	88.5	8.66	8371	380.38	41	18	0	608914307	5.63481e+08	6.25125e+08	6.3603e+08	6.61596e+08	6.91127e+08	8.67303e+08	8.68493e+08	9.24306e+08
High	High	Master Protein	Q9BUJ2	Heterogeneous nuclear ribonucleoprotein U-like protein 1 OS=Homo sapiens GN=HNRNPUL1 PE=1 SV=2	0	0	43	34	389	33	1	856	95.7	6.92	8560	380.02	32	18	0	5.07629e+08	4.65323e+08	4.78574e+08	5.62934e+08	5.85724e+08	6.43101e+08	7.4168e+08	7.14599e+08	7.05747e+08
High	High	Master Protein	Q9UGP4	LIM domain-containing protein 1 OS=Homo sapiens GN=LIMD1 PE=1 SV=1	0	0	73	30	282	30	1	676	72.1	6.65	6089	379.62	29	22	0	1.13514e+08	1.15368e+08	1.26958e+08	1.42439e+08	1.56481e+08	1.58754e+08	1.48145e+08	1.56742e+08	1.56854e+08	Acetyl [N-Term]
High	High	Master Protein	Q96EP5	DAZ-associated protein 1 OS=Homo sapiens GN=DAZAP1 PE=1 SV=1	0	0	37	13	301	13	1	407	43.4	8.56	7257	379.44	13	10	0	6.42055e+08	6.28456e+08	6.58439e+08	7.30883e+08	7.21887e+08	7.95738e+08	7.8973e+08	786158788	8.49622e+08	Acetyl [N-Term]
High	High	Master Protein	P11182	Lipoamide acyltransferase component of branched-chain alpha-keto acid dehydrogenase complex, mitochondrial OS=Homo sapiens GN=DBT PE=1 SV=3	0	0	70	28	409	28	1	482	53.5	8.51	9500	379.29	27	17	0	5.24326e+08	4.89318e+08	5.22752e+08	6.05183e+08	5.83643e+08	6.06313e+08	7.26869e+08	7.71506e+08	7.82031e+08
High	High	Master Protein	Q7Z4V5	Hepatoma-derived growth factor-related protein 2 OS=Homo sapiens GN=HDGFRP2 PE=1 SV=1	0	0	38	28	397	26	1	671	74.3	7.49	9339	377.98	28	12	1	4.01066e+08	3.74388e+08	3.88189e+08	4.61955e+08	4.88672e+08	4.70203e+08	5.11094e+08	5.59387e+08	5.48606e+08
High	High	Master Protein	P08621	U1 small nuclear ribonucleoprotein 70 kDa OS=Homo sapiens GN=SNRNP70 PE=1 SV=2	0	0	49	25	401	25	1	437	51.5	9.94	7815	377.95	25	10	0	1.02592e+09	9.75268e+08	9.9684e+08	1.14492e+09	1.2732e+09	1.30354e+09	1.38811e+09	1.44152e+09	1.32393e+09	Acetyl [N-Term]
High	High	Master Protein	Q13148	TAR DNA-binding protein 43 OS=Homo sapiens GN=TARDBP PE=1 SV=1	0	0	54	16	326	16	1	414	44.7	6.19	8703	377.72	16	9	0	7.27574e+08	6.74452e+08	7.47026e+08	8.47881e+08	1.00932e+09	9.70956e+08	1.05006e+09	1.17919e+09	1.0859e+09
High	High	Master Protein	Q8IWX8	Calcium homeostasis endoplasmic reticulum protein OS=Homo sapiens GN=CHERP PE=1 SV=3	0	0	39	26	321	26	1	916	103.6	9.04	7537	377.38	25	11	0	3.65887e+08	3.59866e+08	3.74222e+08	4.46958e+08	4.79998e+08	4.57842e+08	4.68451e+08	4.7762e+08	4.57356e+08	Acetyl [N-Term]
High	High	Master Protein	Q15648	Mediator of RNA polymerase II transcription subunit 1 OS=Homo sapiens GN=MED1 PE=1 SV=4	0	0	35	39	344	39	1	1581	168.4	8.73	8774	377.26	37	23	0	7.83645e+07	6.94363e+07	7.88162e+07	9.64921e+07	9.56999e+07	8.80008e+07	7.89435e+07	8.35337e+07	8.28841e+07
High	High	Master Protein	Q9Y2T7	Y-box-binding protein 2 OS=Homo sapiens GN=YBX2 PE=1 SV=2	0	0	18	5	281	1	1	364	38.5	10.8	8654	377.24	4	4	0
High	High	Master Protein	O75439	Mitochondrial-processing peptidase subunit beta OS=Homo sapiens GN=PMPCB PE=1 SV=2	0	0	58	24	334	23	1	489	54.3	6.83	8372	377.1	22	10	1	3.68645e+08	3.66736e+08	3.32867e+08	5.00295e+08	4.47128e+08	4.53335e+08	5.70605e+08	5.75873e+08	5.59265e+08
High	High	Master Protein	O96019	Actin-like protein 6A OS=Homo sapiens GN=ACTL6A PE=1 SV=1	0	0	48	16	277	16	1	429	47.4	5.6	6028	377.07	15	12	0	3.95322e+08	3.73287e+08	4.11431e+08	4.35246e+08	4.62631e+08	4.62506e+08	4.56062e+08	4.92255e+08	4.81801e+08
High	High	Master Protein	P61981	14-3-3 protein gamma OS=Homo sapiens GN=YWHAG PE=1 SV=2	0	0	87	21	738	14	1	247	28.3	4.89	17169	376.99	21	9	6	4.00593e+09	4.04211e+09	4.16558e+09	5.23782e+09	5.23273e+09	5.4914e+09	6.11237e+09	6.43596e+09	6.21491e+09	Acetyl [N-Term; N-Term]
High	High	Master Protein	O95239	Chromosome-associated kinesin KIF4A OS=Homo sapiens GN=KIF4A PE=1 SV=3	0	0	48	53	447	53	1	1232	139.8	6.27	10569	376.92	53	25	0	1.94128e+08	1.86916e+08	1.95465e+08	1.76832e+08	1.81204e+08	1.86604e+08	1.74584e+08	1.75127e+08	1.77637e+08
High	High	Master Protein	Q02809	Procollagen-lysine,2-oxoglutarate 5-dioxygenase 1 OS=Homo sapiens GN=PLOD1 PE=1 SV=2	0	0	47	27	363	27	1	727	83.5	6.95	7570	376.48	27	16	0	3.12573e+08	3.14018e+08	3.19846e+08	3.12974e+08	3.25573e+08	3.22723e+08	3.48544e+08	3.66208e+08	363638125
High	High	Master Protein	P53041	Serine/threonine-protein phosphatase 5 OS=Homo sapiens GN=PPP5C PE=1 SV=1	0	0	59	27	361	27	1	499	56.8	6.28	8484	375.93	27	14	0	3.19242e+08	3.18209e+08	2.8373e+08	3.77687e+08	3.94711e+08	4.06617e+08	4.34581e+08	4.11757e+08	4.61783e+08	Acetyl [N-Term]
High	High	Master Protein	Q8TC12	Retinol dehydrogenase 11 OS=Homo sapiens GN=RDH11 PE=1 SV=2	0	0	60	13	344	12	1	318	35.4	8.82	8014	375.84	13	9	1	8.30639e+08	8.09607e+08	8.07688e+08	1.0081e+09	9.81686e+08	9.6464e+08	1.0692e+09	1.12707e+09	1.16054e+09
High	High	Master Protein	Q96ED9	Protein Hook homolog 2 OS=Homo sapiens GN=HOOK2 PE=1 SV=3	0	0	50	36	339	35	1	719	83.2	5.47	7910	375.62	35	18	0	1.89585e+08	1.90217e+08	1.92113e+08	2.77428e+08	2.86427e+08	2.94523e+08	2.95481e+08	2.94641e+08	3.16884e+08
High	High	Master Protein	Q8IYD1	Eukaryotic peptide chain release factor GTP-binding subunit ERF3B OS=Homo sapiens GN=GSPT2 PE=1 SV=2	0	0	42	22	369	7	1	628	68.8	5.43	7816	375.11	22	11	0	9.79692e+07	1.15216e+08	9.90573e+07	1.70961e+08	1.69289e+08	1.62022e+08	1.90535e+08	190461368	1.8145e+08
High	High	Master Protein	Q96DH6	RNA-binding protein Musashi homolog 2 OS=Homo sapiens GN=MSI2 PE=1 SV=1	0	0	43	12	273	10	1	328	35.2	8.48	6530	375.1	12	10	2	2.07263e+08	2.00221e+08	1.9784e+08	2.50972e+08	2.67461e+08	2.39228e+08	2.32076e+08	2.52886e+08	2.59598e+08	Acetyl [N-Term]
High	High	Master Protein	Q96A65	Exocyst complex component 4 OS=Homo sapiens GN=EXOC4 PE=1 SV=1	0	0	44	36	370	36	1	974	110.4	6.49	8313	374.06	36	17	0	1.36651e+08	131079729	1.37041e+08	1.60365e+08	1.70749e+08	1.68302e+08	1.89918e+08	1.792e+08	1.81744e+08
High	High	Master Protein	Q15691	Microtubule-associated protein RP/EB family member 1 OS=Homo sapiens GN=MAPRE1 PE=1 SV=3	0	0	73	18	348	15	1	268	30	5.14	8798	373.61	18	10	3	6.86952e+08	6.92894e+08	7.11308e+08	8.29547e+08	8.54761e+08	8.54713e+08	9.17153e+08	9.97633e+08	1.02866e+09	Acetyl [N-Term]
High	High	Master Protein	O43818	U3 small nucleolar RNA-interacting protein 2 OS=Homo sapiens GN=RRP9 PE=1 SV=1	0	0	48	24	310	24	1	475	51.8	7.85	7551	373.54	24	9	0	2.75424e+08	2.61682e+08	2.78024e+08	3.55812e+08	3.62404e+08	3.61803e+08	4.39782e+08	4.44538e+08	4.82684e+08
High	High	Master Protein	Q9H0B6	Kinesin light chain 2 OS=Homo sapiens GN=KLC2 PE=1 SV=1	0	0	66	36	390	27	1	622	68.9	7.15	9265	373.42	34	19	1	1.22076e+08	1.28504e+08	1.30434e+08	1.72396e+08	1.8517e+08	1.75021e+08	2.08227e+08	2.0774e+08	2.03748e+08	Acetyl [N-Term]
High	High	Master Protein	Q9UNS2	COP9 signalosome complex subunit 3 OS=Homo sapiens GN=COPS3 PE=1 SV=3	0	0	55	18	364	18	1	423	47.8	6.65	9023	373.26	18	10	0	5.48563e+08	5.90409e+08	6.07616e+08	7.20304e+08	7.55482e+08	8.00632e+08	7.29344e+08	7.97823e+08	7.82498e+08	Acetyl [N-Term]
High	High	Master Protein	Q92797	Symplekin OS=Homo sapiens GN=SYMPK PE=1 SV=2	0	0	49	46	343	46	1	1274	141.1	6.13	7113	373.06	46	20	0	2.3063e+08	2.1964e+08	2.74683e+08	3.17042e+08	2.84174e+08	3.4645e+08	1.76891e+08	1.97313e+08	2.01174e+08	Acetyl [N-Term]
High	High	Master Protein	Q14669	E3 ubiquitin-protein ligase TRIP12 OS=Homo sapiens GN=TRIP12 PE=1 SV=1	0	0	33	49	379	49	1	1992	220.3	8.48	10457	372.93	47	23	0	8.95012e+07	9.99016e+07	9.05207e+07	9.98919e+07	1.10812e+08	1.18083e+08	1.33106e+08	1.3572e+08	1.3516e+08	Acetyl [N-Term]
High	High	Master Protein	Q9Y295	Developmentally-regulated GTP-binding protein 1 OS=Homo sapiens GN=DRG1 PE=1 SV=1	0	0	61	20	282	20	1	367	40.5	8.9	6157	372.57	20	12	0	3.01007e+08	3.08428e+08	3.26064e+08	4.05058e+08	4.17221e+08	4.05329e+08	4.23357e+08	4.11148e+08	4.29442e+08
High	High	Master Protein	O60784	Target of Myb protein 1 OS=Homo sapiens GN=TOM1 PE=1 SV=2	0	0	52	17	262	17	1	492	53.8	4.7	6910	372.26	17	10	0	1.34831e+08	1.13244e+08	1.17898e+08	1.44198e+08	1.40193e+08	1.37264e+08	1.48885e+08	1.5543e+08	1.39759e+08	Acetyl [N-Term]
High	High	Master Protein	Q06323	Proteasome activator complex subunit 1 OS=Homo sapiens GN=PSME1 PE=1 SV=1	0	0	60	16	446	16	1	249	28.7	6.02	10555	371.65	16	9	0	1.45468e+09	1.37868e+09	1.54958e+09	1.71903e+09	1.79704e+09	1.8027e+09	1.75642e+09	1.93744e+09	1.73749e+09
High	High	Master Protein	Q8TD30	Alanine aminotransferase 2 OS=Homo sapiens GN=GPT2 PE=1 SV=1	0	0	57	20	249	20	1	523	57.9	7.71	5251	371.31	20	16	0	8.03032e+07	8.81722e+07	8.38536e+07	1.25696e+08	1.2631e+08	1.28302e+08	1.67159e+08	1.54058e+08	1.636e+08
High	High	None	Q8NEV1	Casein kinase II subunit alpha 3 OS=Homo sapiens GN=CSNK2A3 PE=1 SV=2	0	0	54	21	318	19	1	391	45.2	8.5	6129	371.2	21	11	0	5.98571e+08	6.02878e+08	6.69661e+08	6.86914e+08	7.31129e+08	7.76307e+08	7.63476e+08	7.75682e+08	7.74188e+08
High	High	Master Protein	Q96G03	Phosphoglucomutase-2 OS=Homo sapiens GN=PGM2 PE=1 SV=4	0	0	54	34	464	34	1	612	68.2	6.73	10575	371.19	34	13	0	2.30213e+09	2.32719e+09	2.43349e+09	2.30299e+09	2125512109	2.4234e+09	2.12562e+09	2.49441e+09	2.57688e+09	Acetyl [N-Term]
High	High	Master Protein	Q96C36	Pyrroline-5-carboxylate reductase 2 OS=Homo sapiens GN=PYCR2 PE=1 SV=1	0	0	65	18	368	17	1	320	33.6	7.77	10129	370.45	18	12	0	2.48856e+08	2.35269e+08	2.42108e+08	2.83492e+08	3.08175e+08	3.08222e+08	2.91324e+08	3.15073e+08	3.10715e+08	Acetyl [N-Term]
High	High	Master Protein	Q9UBU9	Nuclear RNA export factor 1 OS=Homo sapiens GN=NXF1 PE=1 SV=1	0	0	56	28	402	28	1	619	70.1	8.51	11352	370.19	28	13	0	2.88083e+08	2.77715e+08	2.79085e+08	3.18696e+08	3.33953e+08	3.25378e+08	3.44941e+08	3.59591e+08	3.69631e+08
High	High	Master Protein	Q8IZL8	Proline-, glutamic acid- and leucine-rich protein 1 OS=Homo sapiens GN=PELP1 PE=1 SV=2	0	0	42	30	284	30	1	1130	119.6	4.34	6548	370.01	29	15	0	1.38558e+08	1.34928e+08	1.43572e+08	1.85973e+08	2.07183e+08	1.78953e+08	1.94272e+08	1.93832e+08	1.86852e+08	Acetyl [N-Term]
High	High	Master Protein	Q9H0L4	Cleavage stimulation factor subunit 2 tau variant OS=Homo sapiens GN=CSTF2T PE=1 SV=1	0	0	54	22	280	14	1	616	64.4	7.25	6999	369.89	22	12	9	2.33214e+08	2.60209e+08	2.74448e+08	2.89585e+08	2.83512e+08	3.13209e+08	3.27058e+08	3.68687e+08	3.66366e+08	Acetyl [N-Term]
High	High	Master Protein	Q49AR2	UPF0489 protein C5orf22 OS=Homo sapiens GN=C5orf22 PE=1 SV=2	0	0	45	12	253	12	1	442	49.9	4.78	6464	369.67	12	9	0	1.26442e+08	1.30795e+08	1.30296e+08	1.45523e+08	1.62393e+08	1.53671e+08	1.71385e+08	1.70094e+08	1.72014e+08
High	High	Master Protein	Q9UEW8	STE20/SPS1-related proline-alanine-rich protein kinase OS=Homo sapiens GN=STK39 PE=1 SV=3	0	0	49	18	319	15	1	545	59.4	6.29	7269	369.62	18	9	0	4.84871e+08	4.78823e+08	4.77136e+08	6.02067e+08	6.54173e+08	6.58589e+08	6.50653e+08	6.04018e+08	6.95644e+08
High	High	Master Protein	O15084	Serine/threonine-protein phosphatase 6 regulatory ankyrin repeat subunit A OS=Homo sapiens GN=ANKRD28 PE=1 SV=5	0	0	47	32	309	28	1	1053	112.9	6.25	7879	369.44	30	20	4	1.16796e+08	107790918	1.15745e+08	1.54071e+08	1.58039e+08	1.61739e+08	1.54717e+08	1.64547e+08	1.71295e+08
High	High	Master Protein	P98194	Calcium-transporting ATPase type 2C member 1 OS=Homo sapiens GN=ATP2C1 PE=1 SV=3	0	0	39	28	293	28	1	919	100.5	6.74	7553	369.11	26	14	0	1.33432e+08	1.19986e+08	1.30759e+08	1.76315e+08	1.81184e+08	1.77018e+08	1.90755e+08	1.86218e+08	2.00967e+08
High	High	Master Protein	P55735	Protein SEC13 homolog OS=Homo sapiens GN=SEC13 PE=1 SV=3	0	0	65	19	370	19	1	322	35.5	5.48	7849	368.9	19	13	0	7.97401e+08	8.40851e+08	8.23789e+08	1.07534e+09	1.13865e+09	1.15417e+09	1.06399e+09	1.0489e+09	1.02086e+09	Acetyl [N-Term]
High	High	Master Protein	O43847	Nardilysin OS=Homo sapiens GN=NRDC PE=1 SV=2	0	0	44	49	396	49	1	1150	131.5	5	9555	368.83	47	25	0	3.63712e+08	3.71019e+08	3.99506e+08	4.23992e+08	4.43524e+08	4.46384e+08	5.17286e+08	4.98909e+08	5.10972e+08
High	High	Master Protein	Q00688	Peptidyl-prolyl cis-trans isomerase FKBP3 OS=Homo sapiens GN=FKBP3 PE=1 SV=1	0	0	55	14	305	14	1	224	25.2	9.28	7219	368.7	13	9	0	1.44916e+09	1.39838e+09	1.4695e+09	1.74023e+09	1.78462e+09	1.80095e+09	1.91081e+09	2.0725e+09	2.07309e+09
High	High	Master Protein	Q13404	Ubiquitin-conjugating enzyme E2 variant 1 OS=Homo sapiens GN=UBE2V1 PE=1 SV=2	0	0	70	10	289	4	1	147	16.5	7.93	5516	368.44	10	2	7	7.32965e+08	7.41615e+08	7.14973e+08	9.96328e+08	9.2151e+08	9.48579e+08	9.91606e+08	9.7984e+08	1.03407e+09	Acetyl [N-Term]
High	High	Master Protein	Q9Y5K5	Ubiquitin carboxyl-terminal hydrolase isozyme L5 OS=Homo sapiens GN=UCHL5 PE=1 SV=3	0	0	82	21	318	21	1	329	37.6	5.33	6609	368.25	21	10	0	3.5787e+08	3.59878e+08	3.77826e+08	3.82872e+08	4.02449e+08	4.40789e+08	4.58712e+08	4.92698e+08	5.20596e+08	Acetyl [N-Term]
High	High	Master Protein	P10768	S-formylglutathione hydrolase OS=Homo sapiens GN=ESD PE=1 SV=2	0	0	77	16	345	16	1	282	31.4	7.02	7069	368.2	15	12	0	8.76125e+08	8.71115e+08	8.96351e+08	1.09278e+09	1.16579e+09	1.11788e+09	1.15264e+09	1.29273e+09	1.29929e+09
High	High	Master Protein	Q7Z3T8	Zinc finger FYVE domain-containing protein 16 OS=Homo sapiens GN=ZFYVE16 PE=1 SV=3	0	0	41	40	276	40	1	1539	168.8	4.82	5659	368.2	40	20	0	9.05879e+07	8.6033e+07	8.87991e+07	1.0416e+08	9.80057e+07	9.9017e+07	1.27987e+08	1.27214e+08	1.32022e+08
High	High	Master Protein	Q5QJE6	Deoxynucleotidyltransferase terminal-interacting protein 2 OS=Homo sapiens GN=DNTTIP2 PE=1 SV=2	0	0	53	30	352	30	1	756	84.4	6.16	8817	368.15	30	17	0	1.94169e+08	2.00773e+08	2.01291e+08	2.43061e+08	2.5801e+08	2.51852e+08	2.89719e+08	3.03915e+08	2.9244e+08
High	High	Master Protein	Q9Y6D9	Mitotic spindle assembly checkpoint protein MAD1 OS=Homo sapiens GN=MAD1L1 PE=1 SV=2	0	0	59	43	331	42	1	718	83	5.92	7485	368.13	43	17	0	2.06494e+08	2.14119e+08	2.20178e+08	2.6717e+08	2.70869e+08	2.79032e+08	2.60022e+08	2.73151e+08	2.7256e+08	Acetyl [N-Term]
High	High	Master Protein	Q9Y277	Voltage-dependent anion-selective channel protein 3 OS=Homo sapiens GN=VDAC3 PE=1 SV=1	0	0	64	15	420	14	1	283	30.6	8.66	11491	367.88	15	8	0	7.70309e+08	7.15445e+08	7.70058e+08	8.63202e+08	868753442	8.09017e+08	1.06884e+09	1.13371e+09	1.20363e+09	Acetyl [N-Term]
High	High	Master Protein	Q13492	Phosphatidylinositol-binding clathrin assembly protein OS=Homo sapiens GN=PICALM PE=1 SV=2	0	0	61	27	316	27	1	652	70.7	7.9	7588	367.53	26	16	0	2.62622e+08	2.30117e+08	2.60739e+08	3.08389e+08	3.24166e+08	3.30079e+08	3.09159e+08	3.58185e+08	3.18687e+08	Acetyl [N-Term]
High	High	Master Protein	Q5H9R7	Serine/threonine-protein phosphatase 6 regulatory subunit 3 OS=Homo sapiens GN=PPP6R3 PE=1 SV=2	0	0	50	38	433	37	1	873	97.6	4.6	9657	367.43	38	21	1	3.80923e+08	3.89075e+08	4.1607e+08	4.33213e+08	4.47869e+08	4.44737e+08	4.53492e+08	4.59918e+08	4.67821e+08
High	High	Master Protein	P09417	Dihydropteridine reductase OS=Homo sapiens GN=QDPR PE=1 SV=2	0	0	65	14	255	14	1	244	25.8	7.37	5229	367.23	14	9	0	2.07631e+08	1.97388e+08	2.25826e+08	2.15179e+08	2.49082e+08	238294679	3.20701e+08	3.20121e+08	3.33799e+08	Acetyl [N-Term; N-Term]
High	High	Master Protein	Q9NYF8	Bcl-2-associated transcription factor 1 OS=Homo sapiens GN=BCLAF1 PE=1 SV=2	0	0	43	43	637	41	1	920	106.1	9.98	15204	366.81	43	19	0	1.38594e+09	1.35027e+09	1.50533e+09	1.77751e+09	1.90311e+09	1.96014e+09	1.89519e+09	2.01034e+09	2.10107e+09
High	High	Master Protein	O96013	Serine/threonine-protein kinase PAK 4 OS=Homo sapiens GN=PAK4 PE=1 SV=1	0	0	49	22	308	22	1	591	64	9.73	8093	366.73	22	13	0	3.34013e+08	3.00175e+08	3.21419e+08	4.02798e+08	4.26329e+08	3.96915e+08	4.0508e+08	4.17381e+08	4.08043e+08
High	High	Master Protein Candidate	P0DJD0	RANBP2-like and GRIP domain-containing protein 1 OS=Homo sapiens GN=RGPD1 PE=2 SV=1	0	0	24	40	446	4	1	1748	196.5	6.14	11902	366.67	40	18	0	1.47842e+06	1.24884e+06	1.48093e+06	2.05627e+06	1.7953e+06	1.91909e+06	2.05992e+06	809867	1.6519e+06
High	High	Master Protein	P0DJD1	RANBP2-like and GRIP domain-containing protein 2 OS=Homo sapiens GN=RGPD2 PE=2 SV=1	0	0	24	40	446	4	1	1756	197.2	6.2	11902	366.67	40	18	0	1.47842e+06	1.24884e+06	1.48093e+06	2.05627e+06	1.7953e+06	1.91909e+06	2.05992e+06	809867	1.6519e+06
High	High	Master Protein	O94964	Protein SOGA1 OS=Homo sapiens GN=SOGA1 PE=1 SV=2	0	0	52	60	427	58	1	1423	159.7	6.46	9891	366.49	59	29	2	2.04839e+08	2.00832e+08	2.13608e+08	2.12321e+08	2.18698e+08	2.15187e+08	2.50879e+08	2.48069e+08	2.56702e+08
High	High	Master Protein	Q08945	FACT complex subunit SSRP1 OS=Homo sapiens GN=SSRP1 PE=1 SV=1	0	0	40	31	353	30	1	709	81	6.87	8323	366.43	30	10	1	5.72075e+08	5.56421e+08	6.08332e+08	7.31074e+08	7.98407e+08	8.2293e+08	8.14824e+08	8.48395e+08	8.35976e+08	Acetyl [N-Term]
High	High	Master Protein	Q71RC2	La-related protein 4 OS=Homo sapiens GN=LARP4 PE=1 SV=3	0	0	58	32	413	32	1	724	80.5	6.61	9508	366.32	31	19	0	3.7286e+08	3.67586e+08	3.78314e+08	5.59139e+08	5.94323e+08	6.175e+08	3.99776e+08	4.56404e+08	4.52511e+08	Acetyl [N-Term]
High	High	Master Protein	Q04837	Single-stranded DNA-binding protein, mitochondrial OS=Homo sapiens GN=SSBP1 PE=1 SV=1	0	0	51	7	240	7	1	148	17.2	9.6	5397	366.26	7	4	0	4.91244e+08	5.30606e+08	4.87736e+08	7.52569e+08	6.72281e+08	7.37515e+08	7.5314e+08	7.94179e+08	7.79522e+08
High	High	Master Protein	Q16512	Serine/threonine-protein kinase N1 OS=Homo sapiens GN=PKN1 PE=1 SV=2	0	0	49	34	357	31	1	942	103.9	6.37	8819	366.19	34	16	0	1.85109e+08	1.89402e+08	1.93303e+08	2.34075e+08	2.51256e+08	2.4718e+08	3.13368e+08	3.1748e+08	3.20244e+08	Acetyl [N-Term]
High	High	Master Protein	Q8N8S7	Protein enabled homolog OS=Homo sapiens GN=ENAH PE=1 SV=2	0	0	55	40	408	38	1	591	66.5	6.93	9191	366.07	40	15	2	4.9688e+08	4.74516e+08	5.05915e+08	6.44567e+08	6.63744e+08	6.81186e+08	6.55569e+08	7.2278e+08	7.07481e+08	Acetyl [N-Term]
High	High	Master Protein	Q27J81	Inverted formin-2 OS=Homo sapiens GN=INF2 PE=1 SV=2	0	0	37	32	290	31	1	1249	135.5	5.38	6911	365.29	32	18	1	1.39577e+08	1.25359e+08	1.33111e+08	1.64998e+08	1.41655e+08	1.36906e+08	1.64617e+08	1.56682e+08	1.60705e+08
High	High	Master Protein	Q7Z5J4	Retinoic acid-induced protein 1 OS=Homo sapiens GN=RAI1 PE=1 SV=2	0	0	35	45	298	45	1	1906	203.2	8.79	6762	365	43	23	0	5.34715e+07	4.6891e+07	5.3681e+07	6.04343e+07	6.55905e+07	6.65483e+07	6.3882e+07	6.41838e+07	7.06488e+07
High	High	Master Protein	O60333	Kinesin-like protein KIF1B OS=Homo sapiens GN=KIF1B PE=1 SV=5	0	0	27	41	323	24	1	1816	204.3	5.6	7259	364.62	40	17	1	4.36557e+07	4.39695e+07	5.07445e+07	4.9246e+07	5.44748e+07	5.3986e+07	4.86263e+07	5.99826e+07	6.06591e+07
High	High	Master Protein	Q92615	La-related protein 4B OS=Homo sapiens GN=LARP4B PE=1 SV=3	0	0	40	30	311	30	1	738	80.5	6.92	7096	364.48	29	15	0	2.10738e+08	2.0363e+08	2.17197e+08	2.48644e+08	2.61017e+08	2.51081e+08	2.57872e+08	2.74388e+08	2.85684e+08
High	High	Master Protein	P30566	Adenylosuccinate lyase OS=Homo sapiens GN=ADSL PE=1 SV=2	0	0	71	33	398	33	1	484	54.9	7.11	9353	364.41	32	20	0	4.55005e+08	4.44183e+08	4.41751e+08	5.72324e+08	5.67207e+08	5.35853e+08	6.43498e+08	6.27831e+08	6.25208e+08	Acetyl [N-Term]
High	High	Master Protein	O60256	Phosphoribosyl pyrophosphate synthase-associated protein 2 OS=Homo sapiens GN=PRPSAP2 PE=1 SV=1	0	0	60	20	280	18	1	369	40.9	7.44	5592	364.34	19	12	2	3.25584e+08	2.99314e+08	3.33916e+08	3.84482e+08	3.95506e+08	4.20453e+08	3.9009e+08	3.91757e+08	3.923e+08
High	High	Master Protein	Q9Y4E6	WD repeat-containing protein 7 OS=Homo sapiens GN=WDR7 PE=1 SV=2	0	0	36	37	289	37	1	1490	163.7	6.92	6057	364.19	37	18	0	7.5537e+07	7.13574e+07	7.65473e+07	1.04518e+08	9.45801e+07	9.96685e+07	1.2451e+08	1.28373e+08	1.3142e+08
High	High	Master Protein	P52789	Hexokinase-2 OS=Homo sapiens GN=HK2 PE=1 SV=2	0	0	47	38	382	34	1	917	102.3	6.05	8747	364.15	37	22	0	2.97629e+08	2.70641e+08	2.83226e+08	3.57852e+08	3.83681e+08	3.55218e+08	2.39584e+08	2.49137e+08	2.47093e+08
High	High	Master Protein	Q9UBE0	SUMO-activating enzyme subunit 1 OS=Homo sapiens GN=SAE1 PE=1 SV=1	0	0	66	17	318	17	1	346	38.4	5.3	7583	364.14	17	9	0	3.50148e+08	3.44074e+08	3.56153e+08	432490748	4.42603e+08	4.34444e+08	4.517e+08	4.48231e+08	4.51224e+08
High	High	Master Protein	P51003	Poly(A) polymerase alpha OS=Homo sapiens GN=PAPOLA PE=1 SV=4	0	0	59	36	372	33	1	745	82.8	7.37	8903	363.34	35	21	3	2.79015e+08	2.60879e+08	2.73453e+08	3.20829e+08	3.41078e+08	3.27156e+08	3.66608e+08	3.74765e+08	3.69358e+08
High	High	Master Protein	Q9Y224	UPF0568 protein C14orf166 OS=Homo sapiens GN=C14orf166 PE=1 SV=1	0	0	76	18	348	18	1	244	28.1	6.65	8442	363.11	18	8	0	7.9245e+08	8.1486e+08	8.7249e+08	1.03759e+09	1.09996e+09	1.12828e+09	1.0906e+09	1.15825e+09	1.18972e+09
High	High	Master Protein	Q99471	Prefoldin subunit 5 OS=Homo sapiens GN=PFDN5 PE=1 SV=2	0	0	72	9	264	9	1	154	17.3	6.33	5882	362.93	9	5	0	2.70253e+08	2.82061e+08	2.60602e+08	3.4434e+08	3.75269e+08	3.32743e+08	4.23093e+08	4.07126e+08	4.10854e+08	Acetyl [N-Term]
High	High	Master Protein	Q14694	Ubiquitin carboxyl-terminal hydrolase 10 OS=Homo sapiens GN=USP10 PE=1 SV=2	0	0	52	32	287	32	1	798	87.1	5.31	6505	362.37	31	17	0	2.6048e+08	2.52149e+08	2.78431e+08	2.9526e+08	3.06806e+08	3.29827e+08	3.25618e+08	3.3592e+08	3.24034e+08
High	High	Master Protein	O15446	DNA-directed RNA polymerase I subunit RPA34 OS=Homo sapiens GN=CD3EAP PE=1 SV=1	0	0	67	22	233	22	1	510	55	8.51	5764	361.76	20	15	0	6.5024e+07	6.66069e+07	68308385	7.9335e+07	7.993e+07	8.41989e+07	9.55283e+07	9.83484e+07	97961229	Acetyl [N-Term]
High	High	Master Protein	Q12830	Nucleosome-remodeling factor subunit BPTF OS=Homo sapiens GN=BPTF PE=1 SV=3	0	0	27	61	376	61	1	3046	338.1	6.54	8934	361.64	56	30	0	9.05136e+07	9.44295e+07	1.00507e+08	1.08196e+08	1.20626e+08	1.05317e+08	1.13455e+08	1.19334e+08	1.22865e+08
High	High	Master Protein	Q14997	Proteasome activator complex subunit 4 OS=Homo sapiens GN=PSME4 PE=1 SV=2	0	0	35	50	372	50	1	1843	211.2	6.9	8287	361.18	49	20	0	1.42773e+08	1.39416e+08	1.46854e+08	1.73988e+08	1.70525e+08	1.80332e+08	1.92186e+08	1.9335e+08	1.96004e+08
High	High	None	Q93084	Sarcoplasmic/endoplasmic reticulum calcium ATPase 3 OS=Homo sapiens GN=ATP2A3 PE=1 SV=2	0	0	8	8	259	8	1	1043	113.9	5.57	6796	361.15	8	5	0	3.88718e+08	3.31058e+08	3.73646e+08	4.49127e+08	4.75008e+08	480262603	5.39702e+08	5.51119e+08	5.72958e+08
High	High	Master Protein	Q9Y6D5	Brefeldin A-inhibited guanine nucleotide-exchange protein 2 OS=Homo sapiens GN=ARFGEF2 PE=1 SV=3	0	0	35	52	414	38	1	1785	201.9	6.33	10327	360.88	52	20	0	1.00854e+08	9.15117e+07	1.04354e+08	1.16099e+08	1.28661e+08	1.2783e+08	1.41072e+08	1.41017e+08	1.52389e+08
High	High	Master Protein	P62753	40S ribosomal protein S6 OS=Homo sapiens GN=RPS6 PE=1 SV=1	0	0	37	12	343	12	1	249	28.7	10.84	7518	360.6	12	4	0	2.27949e+09	1.94064e+09	2.28385e+09	2.54923e+09	2.88855e+09	2.68453e+09	2.6614e+09	2.56659e+09	2.6918e+09
High	High	Master Protein	O94925	Glutaminase kidney isoform, mitochondrial OS=Homo sapiens GN=GLS PE=1 SV=1	0	0	45	23	277	22	1	669	73.4	7.77	6424	360.57	22	14	1	1.27353e+08	1.41125e+08	1.34975e+08	1.68344e+08	1.73316e+08	175738352	2.19764e+08	1.83274e+08	2.2903e+08
High	High	Master Protein	Q99567	Nuclear pore complex protein Nup88 OS=Homo sapiens GN=NUP88 PE=1 SV=2	0	0	45	31	325	31	1	741	83.5	5.69	7763	360.54	31	15	0	2.2913e+08	2.29098e+08	2.2178e+08	2.50565e+08	2.43132e+08	2.47051e+08	3.06184e+08	3.14379e+08	3.30191e+08
High	High	Master Protein	Q6PJT7	Zinc finger CCCH domain-containing protein 14 OS=Homo sapiens GN=ZC3H14 PE=1 SV=1	0	0	71	42	467	42	1	736	82.8	7.31	11428	360.25	42	19	0	2.93803e+08	3.0627e+08	3.17976e+08	3.89312e+08	3.91635e+08	3.88978e+08	3.93755e+08	4.13074e+08	4.04057e+08	Acetyl [N-Term]
High	High	Master Protein	O43684	Mitotic checkpoint protein BUB3 OS=Homo sapiens GN=BUB3 PE=1 SV=1	0	0	61	17	352	17	1	328	37.1	6.84	8414	359.72	17	10	0	8.62984e+08	8.90882e+08	9.23578e+08	1.11317e+09	1.10384e+09	1.2806e+09	1.29663e+09	1.21579e+09	1.36085e+09
High	High	Master Protein	Q9H078	Caseinolytic peptidase B protein homolog OS=Homo sapiens GN=CLPB PE=1 SV=1	0	0	46	25	339	25	1	707	78.7	9.01	7482	359.11	25	12	0	3.03574e+08	3.14089e+08	3.40911e+08	4.00321e+08	3.72477e+08	4.03012e+08	3.85815e+08	4.09114e+08	3.98364e+08
High	High	Master Protein	Q9Y6N5	Sulfide:quinone oxidoreductase, mitochondrial OS=Homo sapiens GN=SQRDL PE=1 SV=1	0	0	63	25	283	25	1	450	49.9	9.11	6799	359.11	23	14	0	2.57731e+08	2.49993e+08	259099651	2.47173e+08	2.84415e+08	2.71858e+08	3.81973e+08	3.94611e+08	4.07184e+08
High	High	Master Protein	P53597	Succinate--CoA ligase [ADP/GDP-forming] subunit alpha, mitochondrial OS=Homo sapiens GN=SUCLG1 PE=1 SV=4	0	0	41	14	265	14	1	346	36.2	8.79	5379	358.91	14	8	0	2.97395e+08	2.81714e+08	2.95983e+08	4.76721e+08	4.76598e+08	5.01925e+08	5.44827e+08	6.24848e+08	6.343e+08
High	High	Master Protein	Q92793	CREB-binding protein OS=Homo sapiens GN=CREBBP PE=1 SV=3	0	0	28	50	371	30	1	2442	265.2	8.53	7650	358.82	48	21	1	4.73777e+07	4.54263e+07	4.88373e+07	5.75322e+07	6.17837e+07	6.29329e+07	7.01756e+07	7.34303e+07	7.07286e+07	Acetyl [N-Term]
High	High	Master Protein	Q5SRE5	Nucleoporin NUP188 homolog OS=Homo sapiens GN=NUP188 PE=1 SV=1	0	0	34	49	362	49	1	1749	195.9	6.73	7447	358.6	48	22	0	2.50538e+08	1.8584e+08	192341196	2.19017e+08	2.26412e+08	2.29332e+08	2.37728e+08	2.40369e+08	3.09751e+08	Acetyl [N-Term]
High	High	Master Protein	P50748	Kinetochore-associated protein 1 OS=Homo sapiens GN=KNTC1 PE=1 SV=1	0	0	30	57	420	57	1	2209	250.6	5.97	9169	358.44	56	21	0	3.05915e+08	3.26351e+08	3.19552e+08	3.08221e+08	3.31884e+08	3.23982e+08	3.36829e+08	3.42998e+08	3.18826e+08
High	High	Master Protein	P61106	Ras-related protein Rab-14 OS=Homo sapiens GN=RAB14 PE=1 SV=4	0	0	82	18	342	17	1	215	23.9	6.21	7452	358.01	18	13	0	4.96007e+08	4.99725e+08	4.86671e+08	6.0739e+08	6.38488e+08	6.38862e+08	6.97531e+08	6.67038e+08	6.75874e+08
High	High	Master Protein	P18124	60S ribosomal protein L7 OS=Homo sapiens GN=RPL7 PE=1 SV=1	0	0	53	19	399	19	1	248	29.2	10.65	9276	357.6	19	8	0	3.96717e+09	3.95145e+09	3.97141e+09	4.44844e+09	4.81017e+09	4.39444e+09	4.94998e+09	4.65097e+09	5.01706e+09
High	High	Master Protein	P10275	Androgen receptor OS=Homo sapiens GN=AR PE=1 SV=3	0	0	46	30	322	30	1	920	99.1	6.42	8030	357.42	28	17	0	1.45101e+08	1.31024e+08	1.36086e+08	1.80109e+08	1.94078e+08	1.81816e+08	1.97158e+08	2.03007e+08	1.97765e+08	Acetyl [N-Term]
High	High	Master Protein	Q96HC4	PDZ and LIM domain protein 5 OS=Homo sapiens GN=PDLIM5 PE=1 SV=5	0	0	56	27	347	27	1	596	63.9	8.21	9240	357.35	27	10	0	2.76133e+08	2.79674e+08	2.98793e+08	3.79406e+08	4.18133e+08	4.23145e+08	4.39614e+08	4.47782e+08	4.66486e+08	Acetyl [N-Term]
High	High	Master Protein	O14776	Transcription elongation regulator 1 OS=Homo sapiens GN=TCERG1 PE=1 SV=2	0	0	38	54	413	54	1	1098	123.8	8.65	7864	357.31	52	24	0	4.58774e+08	4.43973e+08	4.68368e+08	5.32503e+08	5.3174e+08	5.51718e+08	6.49083e+08	6.92368e+08	6.59924e+08
High	High	Master Protein	Q8NCW5	NAD(P)H-hydrate epimerase OS=Homo sapiens GN=NAXE PE=1 SV=2	0	0	54	14	238	14	1	288	31.7	7.66	4826	356.99	14	10	0	4.81579e+08	486989067	5.0209e+08	6.03357e+08	5.63149e+08	6.75711e+08	6.66764e+08	6.90971e+08	5.97252e+08
High	High	Master Protein	Q8IYB3	Serine/arginine repetitive matrix protein 1 OS=Homo sapiens GN=SRRM1 PE=1 SV=2	0	0	19	18	307	18	1	904	102.3	11.84	7233	356.72	18	8	0	2.7478e+08	2.74339e+08	2.6336e+08	3.37124e+08	3.56689e+08	3.92511e+08	2.83381e+08	308068204	3.34389e+08	Acetyl [N-Term]
High	High	Master Protein	Q5T6F2	Ubiquitin-associated protein 2 OS=Homo sapiens GN=UBAP2 PE=1 SV=1	0	0	34	22	301	22	1	1119	117	7.34	6657	356.7	22	16	0	1.28749e+08	1.30673e+08	1.30924e+08	152671146	1.43899e+08	1.50786e+08	1.71477e+08	1.72427e+08	1.6585e+08	Acetyl [N-Term]
High	High	Master Protein	O60832	H/ACA ribonucleoprotein complex subunit 4 OS=Homo sapiens GN=DKC1 PE=1 SV=3	0	0	55	30	439	30	1	514	57.6	9.42	10064	356.14	30	16	0	6.96814e+08	7.24758e+08	7.42206e+08	9.09819e+08	9.36761e+08	9.25952e+08	1.00122e+09	1.02182e+09	9.28955e+08	Acetyl [N-Term]
High	High	Master Protein	Q96A33	Coiled-coil domain-containing protein 47 OS=Homo sapiens GN=CCDC47 PE=1 SV=1	0	0	45	24	339	24	1	483	55.8	4.87	7539	356.14	23	14	0	5.24666e+08	5.71022e+08	559789287	6.55008e+08	7.09817e+08	6.87361e+08	8.66826e+08	8.66335e+08	8.77662e+08
High	High	Master Protein	O95433	Activator of 90 kDa heat shock protein ATPase homolog 1 OS=Homo sapiens GN=AHSA1 PE=1 SV=1	0	0	77	22	431	22	1	338	38.3	5.53	9206	356.03	22	11	0	1.35292e+09	1.36423e+09	1.4328e+09	1.6528e+09	1.7754e+09	1.69994e+09	1.7864e+09	1.82979e+09	1.88365e+09
High	High	Master Protein	Q9H3S7	Tyrosine-protein phosphatase non-receptor type 23 OS=Homo sapiens GN=PTPN23 PE=1 SV=1	0	0	37	45	353	45	1	1636	178.9	6.92	8009	356.03	45	20	0	1.84299e+08	1.77172e+08	1.95779e+08	2.25639e+08	2.71007e+08	2.56041e+08	2.67311e+08	2.71193e+08	2.87462e+08
High	High	Master Protein	Q96JB2	Conserved oligomeric Golgi complex subunit 3 OS=Homo sapiens GN=COG3 PE=1 SV=3	0	0	62	44	328	44	1	828	94	5.57	7179	355.95	44	18	0	2.14751e+08	2.31487e+08	2.39335e+08	2.92168e+08	3.144e+08	2.93699e+08	2.85995e+08	2.8435e+08	2.851e+08	Acetyl [N-Term]
High	High	Master Protein	Q15147	1-phosphatidylinositol 4,5-bisphosphate phosphodiesterase beta-4 OS=Homo sapiens GN=PLCB4 PE=1 SV=3	0	0	55	53	419	53	1	1175	134.4	6.9	8450	355.82	52	22	0	2.88408e+08	2.8165e+08	3.00963e+08	3.67661e+08	4.04809e+08	4.06135e+08	4.2523e+08	4.34638e+08	4.49055e+08
High	High	Master Protein	Q8NI27	THO complex subunit 2 OS=Homo sapiens GN=THOC2 PE=1 SV=2	0	0	45	62	502	61	1	1593	182.7	8.44	11269	355.78	60	19	0	3.25285e+08	3.32294e+08	3.58348e+08	4.06636e+08	4.37487e+08	4.50887e+08	4.33195e+08	4.31183e+08	4.32281e+08	Acetyl [N-Term]
High	High	Master Protein	O95747	Serine/threonine-protein kinase OSR1 OS=Homo sapiens GN=OXSR1 PE=1 SV=1	0	0	42	19	334	16	1	527	58	6.43	7720	355.37	19	11	6	5.03192e+08	4.83415e+08	5.38613e+08	6.1659e+08	6.25348e+08	6.34007e+08	6.81481e+08	6.91324e+08	7.20317e+08	Acetyl [N-Term]
High	High	Master Protein	P82094	TATA element modulatory factor OS=Homo sapiens GN=TMF1 PE=1 SV=2	0	0	56	46	338	46	1	1093	122.8	4.92	7942	355.15	45	21	0	1.37999e+08	1.38606e+08	1.54094e+08	1.83752e+08	2.07527e+08	2.0059e+08	1.54155e+08	1.51835e+08	1.62768e+08	Acetyl [N-Term]
High	High	Master Protein	Q96T23	Remodeling and spacing factor 1 OS=Homo sapiens GN=RSF1 PE=1 SV=2	0	0	36	46	382	46	1	1441	163.7	5.01	8919	353.91	45	21	0	1.32646e+08	1.31986e+08	1.43507e+08	1.62133e+08	1.56235e+08	1.81647e+08	2.14894e+08	2.29839e+08	2.34621e+08
High	High	Master Protein	Q04609	Glutamate carboxypeptidase 2 OS=Homo sapiens GN=FOLH1 PE=1 SV=1	0	0	50	31	441	31	1	750	84.3	6.98	10606	353.83	30	16	0	9.92038e+08	9.90262e+08	1.05669e+09	1.08506e+09	1.10104e+09	1.18151e+09	1.09429e+09	1.16787e+09	1.1867e+09	Acetyl [N-Term]
High	High	Master Protein	Q9NRY5	Protein FAM114A2 OS=Homo sapiens GN=FAM114A2 PE=1 SV=4	0	0	77	34	413	33	1	505	55.4	4.88	11003	353.74	34	14	0	3.10138e+08	2.85766e+08	3.0273e+08	3.90606e+08	3.85731e+08	3.91241e+08	3.76361e+08	3.94293e+08	4.02013e+08	Acetyl [N-Term]
High	High	Master Protein	Q9UBV2	Protein sel-1 homolog 1 OS=Homo sapiens GN=SEL1L PE=1 SV=3	0	0	42	23	260	23	1	794	88.7	5.39	5206	353.64	23	11	0	7.37733e+07	7.44842e+07	7.34273e+07	9.64983e+07	9.5996e+07	8.92639e+07	1.13328e+08	1.16129e+08	1.25775e+08
High	High	Master Protein	P07205	Phosphoglycerate kinase 2 OS=Homo sapiens GN=PGK2 PE=1 SV=3	0	0	18	7	279	1	1	417	44.8	8.54	6422	353.6	7	2	0	4457264	3.38011e+06	3.21629e+06	4428712	5.65485e+06	4.32573e+06	4.46386e+06	6.18865e+06	5787293
High	High	Master Protein	O95235	Kinesin-like protein KIF20A OS=Homo sapiens GN=KIF20A PE=1 SV=1	0	0	62	42	322	42	1	890	100.2	6.92	7521	353.49	40	22	0	1.16254e+08	1.16076e+08	1.22289e+08	1.21973e+08	1.26219e+08	1.27221e+08	9.31041e+07	1.00243e+08	1.00324e+08
High	High	Master Protein	P43034	Platelet-activating factor acetylhydrolase IB subunit alpha OS=Homo sapiens GN=PAFAH1B1 PE=1 SV=2	0	0	74	26	392	25	1	410	46.6	7.37	8583	353.31	25	15	1	662190190	6.84804e+08	6.56836e+08	8.51075e+08	9.3386e+08	9.16152e+08	9.39964e+08	9.69867e+08	9.65053e+08
High	High	Master Protein	Q9UPU5	Ubiquitin carboxyl-terminal hydrolase 24 OS=Homo sapiens GN=USP24 PE=1 SV=3	0	0	28	54	339	54	1	2620	294.2	6.14	7910	353.25	52	21	0	9.52417e+07	1.03373e+08	1.05772e+08	1.25927e+08	1.33694e+08	1.40069e+08	1.52248e+08	1.48345e+08	1.48398e+08
High	High	Master Protein	P13674	Prolyl 4-hydroxylase subunit alpha-1 OS=Homo sapiens GN=P4HA1 PE=1 SV=2	0	0	51	22	289	22	1	534	61	6.01	6108	352.2	22	15	0	2.52945e+08	2.43453e+08	2.32297e+08	3.01627e+08	3.13517e+08	3.31399e+08	3.32383e+08	3.35289e+08	3.42189e+08
High	High	Master Protein	Q8N3U4	Cohesin subunit SA-2 OS=Homo sapiens GN=STAG2 PE=1 SV=3	0	0	40	44	396	34	1	1231	141.2	5.43	9470	351.99	41	19	11	3.90306e+08	3.94657e+08	4.44028e+08	4.60853e+08	5.03928e+08	5.40494e+08	4.87577e+08	5.26432e+08	4.89026e+08
High	High	Master Protein	Q96CW1	AP-2 complex subunit mu OS=Homo sapiens GN=AP2M1 PE=1 SV=2	0	0	49	20	297	20	1	435	49.6	9.54	6508	351.91	19	10	0	3.50304e+08	3.45069e+08	3.8903e+08	4.79578e+08	5.00529e+08	4.9025e+08	5.20881e+08	5.27979e+08	5.19347e+08	Acetyl [N-Term]
High	High	Master Protein	Q92804	TATA-binding protein-associated factor 2N OS=Homo sapiens GN=TAF15 PE=1 SV=1	0	0	47	22	514	20	1	592	61.8	8.02	12763	350.89	22	8	2	2.28869e+09	2.22674e+09	2.3198e+09	2.92052e+09	3.01161e+09	2.95376e+09	3.40873e+09	3.38246e+09	3.16146e+09
High	High	Master Protein	Q9BTE3	Mini-chromosome maintenance complex-binding protein OS=Homo sapiens GN=MCMBP PE=1 SV=2	0	0	45	24	316	24	1	642	72.9	5.87	7056	350.63	24	13	0	2.38386e+08	2.28076e+08	2.39157e+08	2.6087e+08	2.76617e+08	2.68057e+08	2.92145e+08	2.83727e+08	2.92718e+08
High	High	Master Protein	Q13136	Liprin-alpha-1 OS=Homo sapiens GN=PPFIA1 PE=1 SV=1	0	0	49	54	391	40	1	1202	135.7	6.29	9117	350.32	49	27	15	2.15878e+08	2.13297e+08	2.21373e+08	2.62604e+08	2.83234e+08	2.86138e+08	2.97297e+08	3.10726e+08	3.14855e+08
High	High	Master Protein	P31937	3-hydroxyisobutyrate dehydrogenase, mitochondrial OS=Homo sapiens GN=HIBADH PE=1 SV=2	0	0	54	11	219	11	1	336	35.3	8.13	4080	350.13	11	10	0	1.74845e+08	1.87863e+08	2.04894e+08	2.40831e+08	2.46653e+08	2.63952e+08	3.16783e+08	3.50581e+08	3.41346e+08
High	High	Master Protein	O15164	Transcription intermediary factor 1-alpha OS=Homo sapiens GN=TRIM24 PE=1 SV=3	0	0	49	35	323	32	1	1050	116.8	7.11	6648	349.89	35	16	2	106318691	1.00718e+08	1.08963e+08	1.22002e+08	1.25471e+08	1.31158e+08	1.42568e+08	1.4788e+08	1.55946e+08
High	High	Master Protein	O00273	DNA fragmentation factor subunit alpha OS=Homo sapiens GN=DFFA PE=1 SV=1	0	0	61	17	285	17	1	331	36.5	4.79	6274	349.38	17	10	0	4.13612e+08	4.02213e+08	3.84923e+08	4.68778e+08	5.32277e+08	5.02197e+08	5.55376e+08	5.52176e+08	5.6839e+08	Acetyl [N-Term]
High	High	Master Protein	O14979	Heterogeneous nuclear ribonucleoprotein D-like OS=Homo sapiens GN=HNRNPDL PE=1 SV=3	0	0	42	17	411	15	1	420	46.4	9.57	9202	349.26	16	11	0	7.30767e+08	7.73855e+08	7.66301e+08	9.23312e+08	1.02244e+09	1.00249e+09	1.12712e+09	1.1914e+09	1.04149e+09
High	High	Master Protein	Q96KG9	N-terminal kinase-like protein OS=Homo sapiens GN=SCYL1 PE=1 SV=1	0	0	59	35	324	35	1	808	89.6	6.3	6754	348.96	35	16	0	2.64016e+08	2.58622e+08	2.61923e+08	3.25918e+08	3.40245e+08	3.38392e+08	3.7973e+08	3.64796e+08	3.74271e+08
High	High	Master Protein	Q9NXC5	WD repeat-containing protein mio OS=Homo sapiens GN=MIOS PE=1 SV=2	0	0	58	38	317	38	1	875	98.5	6.73	7143	348.9	37	19	0	1.11651e+08	1.12074e+08	1.13353e+08	1.44571e+08	1.49343e+08	1.50781e+08	1.58183e+08	1.59211e+08	1.6911e+08	Acetyl [N-Term]
High	High	Master Protein	Q9UI12	V-type proton ATPase subunit H OS=Homo sapiens GN=ATP6V1H PE=1 SV=1	0	0	52	21	312	21	1	483	55.8	6.48	6768	348.19	21	12	0	2.44695e+08	2.56391e+08	2.65908e+08	3.24091e+08	3.27089e+08	3.41234e+08	3.49595e+08	3.67843e+08	3.79417e+08
High	High	Master Protein	Q12797	Aspartyl/asparaginyl beta-hydroxylase OS=Homo sapiens GN=ASPH PE=1 SV=3	0	0	41	24	260	24	1	758	85.8	5.01	8058	348.16	22	10	0	5.85548e+07	5.37192e+07	5.69115e+07	6.3132e+07	6.8768e+07	7.15957e+07	9.28944e+07	1.01658e+08	9.76257e+07
High	High	Master Protein	P21399	Cytoplasmic aconitate hydratase OS=Homo sapiens GN=ACO1 PE=1 SV=3	0	0	51	37	393	37	1	889	98.3	6.68	8530	347.93	37	11	0	6.39782e+08	6.20886e+08	6.4383e+08	7.32999e+08	793063317	8.00324e+08	7.90607e+08	8.20822e+08	8.01808e+08	Acetyl [N-Term]
High	High	Master Protein	Q96K17	Transcription factor BTF3 homolog 4 OS=Homo sapiens GN=BTF3L4 PE=1 SV=1	0	0	77	12	243	11	1	158	17.3	6.35	4473	347.61	12	7	0	5.22893e+08	5.35787e+08	5.26335e+08	5.86982e+08	5.37242e+08	5.59707e+08	7.63526e+08	7.82489e+08	7.78562e+08
High	High	Master Protein	Q9P0K7	Ankycorbin OS=Homo sapiens GN=RAI14 PE=1 SV=2	0	0	57	48	376	48	1	980	110	6.21	8630	347.36	48	23	0	1.88776e+08	1.74079e+08	1.86878e+08	2.28125e+08	2.35067e+08	2.4265e+08	2.41307e+08	2.27627e+08	2.26228e+08
High	High	Master Protein	O75396	Vesicle-trafficking protein SEC22b OS=Homo sapiens GN=SEC22B PE=1 SV=4	0	0	43	12	269	12	1	215	24.6	6.92	6482	347.16	12	7	0	6.81509e+08	6.57402e+08	7.5483e+08	7.61058e+08	7.84477e+08	866977012	9.68105e+08	1.03186e+09	1.08176e+09
High	High	Master Protein	Q8N3C0	Activating signal cointegrator 1 complex subunit 3 OS=Homo sapiens GN=ASCC3 PE=1 SV=3	0	0	39	73	473	73	1	2202	251.3	7.09	10764	347.13	71	30	0	2.90475e+08	2.84646e+08	2.79104e+08	3.279e+08	346335778	3.39569e+08	3.61184e+08	3.77569e+08	3.79466e+08
High	High	Master Protein	Q7Z5L9	Interferon regulatory factor 2-binding protein 2 OS=Homo sapiens GN=IRF2BP2 PE=1 SV=2	0	0	61	21	263	18	1	587	61	8.69	6445	346.24	21	13	0	82125769	8.5569e+07	8.02377e+07	1.14283e+08	1.24872e+08	1.1501e+08	1.31284e+08	1.1212e+08	1.09704e+08	Acetyl [N-Term]
High	High	Master Protein	P11388	DNA topoisomerase 2-alpha OS=Homo sapiens GN=TOP2A PE=1 SV=3	0	0	37	55	447	40	1	1531	174.3	8.72	10179	346.02	52	20	0	1.52019e+08	1.50257e+08	1.6803e+08	1.64953e+08	1.74072e+08	1.75174e+08	1.94973e+08	1.98964e+08	1.99836e+08	Acetyl [N-Term]
High	High	Master Protein	P34896	Serine hydroxymethyltransferase, cytosolic OS=Homo sapiens GN=SHMT1 PE=1 SV=1	0	0	66	24	346	22	1	483	53	7.71	7911	345.38	24	11	0	648793994	6.23716e+08	6.386e+08	7.71665e+08	8.1676e+08	8.05812e+08	8.37029e+08	8.30212e+08	8.2283e+08	Acetyl [N-Term]
High	High	Master Protein	Q9NYL9	Tropomodulin-3 OS=Homo sapiens GN=TMOD3 PE=1 SV=1	0	0	61	19	291	17	1	352	39.6	5.19	6221	345.07	18	11	2	3.55503e+08	3.53275e+08	3.61277e+08	4.04941e+08	4.29112e+08	4.29125e+08	4.20289e+08	4.13445e+08	4.19294e+08
High	High	Master Protein	P42356	Phosphatidylinositol 4-kinase alpha OS=Homo sapiens GN=PI4KA PE=1 SV=4	0	0	34	58	390	58	1	2102	236.7	7.06	10072	344.91	56	23	0	1.24771e+08	1.19822e+08	1.30833e+08	1.32094e+08	1.35262e+08	1.39064e+08	1.39334e+08	1.44344e+08	1.48806e+08
High	High	Master Protein	P25786	Proteasome subunit alpha type-1 OS=Homo sapiens GN=PSMA1 PE=1 SV=1	0	0	84	20	423	20	1	263	29.5	6.61	9706	343.55	20	8	0	1.54139e+09	1.55306e+09	1.60397e+09	1.83835e+09	1.89772e+09	1.99846e+09	2.11829e+09	2.32195e+09	2.42151e+09
High	High	Master Protein	Q9Y696	Chloride intracellular channel protein 4 OS=Homo sapiens GN=CLIC4 PE=1 SV=4	0	0	79	20	282	19	1	253	28.8	5.59	5978	343.21	20	10	1	3.99981e+08	3.94904e+08	3.92001e+08	5.43873e+08	6.0104e+08	5.61904e+08	5.79595e+08	6.02752e+08	5.99479e+08	Acetyl [N-Term]
High	High	None	Q92928	Putative Ras-related protein Rab-1C OS=Homo sapiens GN=RAB1C PE=5 SV=2	0	0	36	8	303	4	1	201	22	5.43	7037	343.07	8	4	0	1.54917e+09	1.63536e+09	1.68409e+09	1.6753e+09	1.77852e+09	1.94932e+09	2.26891e+09	2.20438e+09	2.22233e+09
High	High	Master Protein	P33527	Multidrug resistance-associated protein 1 OS=Homo sapiens GN=ABCC1 PE=1 SV=3	0	0	29	36	284	35	1	1531	171.5	7.11	6740	343.06	36	17	0	9.43669e+07	1.07472e+08	1.15578e+08	1.00633e+08	1.07562e+08	1.08982e+08	1.49239e+08	1.61836e+08	1.50327e+08
High	High	Master Protein	P28290	Sperm-specific antigen 2 OS=Homo sapiens GN=SSFA2 PE=1 SV=3	0	0	35	36	327	36	1	1259	138.3	5.19	8350	343	36	19	0	9.16519e+07	9.12544e+07	9.61639e+07	1.33291e+08	1.42355e+08	1.43423e+08	1.0667e+08	1.20284e+08	1.13799e+08
High	High	Master Protein	O00507	Probable ubiquitin carboxyl-terminal hydrolase FAF-Y OS=Homo sapiens GN=USP9Y PE=2 SV=2	0	0	32	67	507	27	1	2555	290.9	5.86	11726	342.88	65	24	0	3.69352e+07	3.5493e+07	3.55641e+07	4.03001e+07	4.17159e+07	4.45109e+07	4.7082e+07	4.31157e+07	4.681e+07
High	High	Master Protein	Q9Y5S9	RNA-binding protein 8A OS=Homo sapiens GN=RBM8A PE=1 SV=1	0	0	78	11	442	11	1	174	19.9	5.72	13011	342.87	11	5	0	6.42727e+08	6.31913e+08	6.04212e+08	7.71133e+08	7.18807e+08	7.84019e+08	8.40275e+08	9.26216e+08	9.17645e+08	Acetyl [N-Term]
High	High	Master Protein	Q9P2D3	HEAT repeat-containing protein 5B OS=Homo sapiens GN=HEATR5B PE=1 SV=2	0	0	28	41	292	41	1	2071	224.2	7.17	7006	342.57	40	22	0	6.40151e+07	5.97389e+07	5.86634e+07	8.35118e+07	9.08709e+07	8.96489e+07	8.54047e+07	9.72392e+07	9.10279e+07
High	High	Master Protein	P35573	Glycogen debranching enzyme OS=Homo sapiens GN=AGL PE=1 SV=3	0	0	50	59	399	59	1	1532	174.7	6.76	9129	342.43	58	28	0	1.89919e+08	1.86767e+08	1.91601e+08	2.28051e+08	2.38388e+08	2.39704e+08	2.51921e+08	2.68194e+08	2.7134e+08
High	High	Master Protein	Q14684	Ribosomal RNA processing protein 1 homolog B OS=Homo sapiens GN=RRP1B PE=1 SV=3	0	0	55	31	302	31	1	758	84.4	9.76	6514	342.43	31	15	0	1.85526e+08	1.66976e+08	1.89528e+08	2.1151e+08	2.26523e+08	2.18571e+08	2.08423e+08	2.3964e+08	2.32552e+08
High	High	Master Protein	P49916	DNA ligase 3 OS=Homo sapiens GN=LIG3 PE=1 SV=2	0	0	43	40	375	40	1	1009	112.8	9.01	9128	342.26	40	18	0	2.2262e+08	2.09338e+08	2.18376e+08	2.65601e+08	2.9446e+08	2.75501e+08	2.93969e+08	3.18964e+08	3.1934e+08
High	High	Master Protein	Q9Y4A5	Transformation/transcription domain-associated protein OS=Homo sapiens GN=TRRAP PE=1 SV=3	0	0	25	74	379	74	1	3859	437.3	8.19	8850	342.17	69	34	0	9.89099e+07	1.00835e+08	9.78662e+07	1.27554e+08	1.30077e+08	1.30794e+08	1.50321e+08	1.46698e+08	1.43849e+08	Acetyl [N-Term]
High	High	Master Protein	O60313	Dynamin-like 120 kDa protein, mitochondrial OS=Homo sapiens GN=OPA1 PE=1 SV=3	0	0	51	50	448	50	1	960	111.6	7.87	10512	342.08	49	24	0	3.95628e+08	3.84204e+08	4.20101e+08	4.46675e+08	4.66916e+08	4.59178e+08	5.57766e+08	5.62271e+08	5.6426e+08
High	High	None	P24844	Myosin regulatory light polypeptide 9 OS=Homo sapiens GN=MYL9 PE=1 SV=4	0	0	38	8	277	8	1	172	19.8	4.92	5753	341.94	8	6	0	1.07277e+09	1.15623e+09	1.11036e+09	1.18976e+09	1.28374e+09	1.23839e+09	1.21742e+09	1.22081e+09	1.18161e+09
High	High	Master Protein	Q8N6T3	ADP-ribosylation factor GTPase-activating protein 1 OS=Homo sapiens GN=ARFGAP1 PE=1 SV=2	0	0	66	20	275	20	1	406	44.6	5.66	7091	341.75	20	14	0	1.58503e+08	1.63205e+08	1.72282e+08	2.11112e+08	2.16748e+08	2.14201e+08	2.49691e+08	2.42678e+08	2.46716e+08
High	High	Master Protein	Q9NTI5	Sister chromatid cohesion protein PDS5 homolog B OS=Homo sapiens GN=PDS5B PE=1 SV=1	0	0	36	51	451	48	1	1447	164.6	8.47	11414	341.7	51	16	0	2.04874e+08	2.01185e+08	2.21731e+08	2.23173e+08	2.42616e+08	2.39139e+08	2.78885e+08	2.9695e+08	2.84101e+08
High	High	Master Protein	P39880	Homeobox protein cut-like 1 OS=Homo sapiens GN=CUX1 PE=1 SV=3	0	0	42	53	377	21	1	1505	164.1	5.9	9044	341.43	52	25	33	1.58793e+08	1.51899e+08	1.61867e+08	2.11085e+08	2.40672e+08	2.3592e+08	2.10259e+08	2.34899e+08	2.29086e+08
High	High	Master Protein	Q8IX01	SURP and G-patch domain-containing protein 2 OS=Homo sapiens GN=SUGP2 PE=1 SV=2	0	0	56	53	372	53	1	1082	120.1	7.28	7692	341.29	53	23	0	2.47219e+08	2.55531e+08	2.49137e+08	2.70314e+08	2.9202e+08	3.05541e+08	2.92286e+08	3.13606e+08	3.05506e+08
High	High	Master Protein	Q96EE3	Nucleoporin SEH1 OS=Homo sapiens GN=SEH1L PE=1 SV=3	0	0	65	19	281	19	1	360	39.6	8.09	6245	341.24	19	12	0	1.84414e+08	1.89003e+08	2.07144e+08	2.12257e+08	2.40086e+08	2.42185e+08	2.38858e+08	2.44038e+08	2.4808e+08
High	High	Master Protein	O75410	Transforming acidic coiled-coil-containing protein 1 OS=Homo sapiens GN=TACC1 PE=1 SV=2	0	0	58	38	334	35	1	805	87.7	4.88	7702	340.81	38	15	0	1.19473e+08	1.07542e+08	1.1353e+08	1.431e+08	1.44081e+08	1.50359e+08	1.57368e+08	1.60863e+08	1.58577e+08
High	High	Master Protein	Q86U42	Polyadenylate-binding protein 2 OS=Homo sapiens GN=PABPN1 PE=1 SV=3	0	0	49	9	340	9	1	306	32.7	5.06	7313	340.66	9	5	0	3.65007e+08	4.06253e+08	4.03781e+08	5.02166e+08	5.3138e+08	513146641	5.69875e+08	5.22679e+08	5.50157e+08	Acetyl [N-Term]
High	High	Master Protein	O76003	Glutaredoxin-3 OS=Homo sapiens GN=GLRX3 PE=1 SV=2	0	0	62	18	288	18	1	335	37.4	5.39	5714	340.25	17	12	0	6.56355e+08	6.92026e+08	6.77873e+08	7.88349e+08	7.54199e+08	7.70803e+08	7.86884e+08	8.42833e+08	8.30077e+08	Acetyl [N-Term]
High	High	Master Protein	P62158	Calmodulin OS=Homo sapiens GN=CALM1 PE=1 SV=2	0	0	71	13	511	13	1	149	16.8	4.22	11909	339.59	13	5	0	5.35879e+09	5.10701e+09	5.46034e+09	6.35597e+09	6.29073e+09	5.98808e+09	6.93283e+09	6.85212e+09	7.15646e+09	Acetyl [N-Term]
High	High	Master Protein	Q9Y4D8	Probable E3 ubiquitin-protein ligase HECTD4 OS=Homo sapiens GN=HECTD4 PE=1 SV=5	0	0	22	59	345	59	1	3996	439.1	6.19	8549	339.22	57	30	0	8.90946e+07	8.37204e+07	8.09148e+07	9.18321e+07	1.03875e+08	1.10119e+08	1.02459e+08	1.14151e+08	1.11347e+08
High	High	Master Protein	Q6PI48	Aspartate--tRNA ligase, mitochondrial OS=Homo sapiens GN=DARS2 PE=1 SV=1	0	0	58	31	275	31	1	645	73.5	8.02	5263	338.41	30	13	0	3.3296e+08	3.32503e+08	3.66704e+08	4.27543e+08	4.51122e+08	4.69592e+08	5.05297e+08	5.19812e+08	5.36527e+08
High	High	Master Protein	Q9BW27	Nuclear pore complex protein Nup85 OS=Homo sapiens GN=NUP85 PE=1 SV=1	0	0	42	20	281	20	1	656	75	5.55	6315	337.92	20	14	0	1.71726e+08	1.67837e+08	1.77276e+08	1.85326e+08	2.03336e+08	2.12119e+08	2.0523e+08	1.97342e+08	2.17822e+08	Acetyl [N-Term]
High	High	Master Protein	Q07812	Apoptosis regulator BAX OS=Homo sapiens GN=BAX PE=1 SV=1	0	0	53	10	220	10	1	192	21.2	5.22	4617	337.75	10	8	0	1.84998e+08	1.65263e+08	1.83305e+08	1.78569e+08	1.94928e+08	1.96925e+08	2.21469e+08	2.17417e+08	2.27783e+08	Acetyl [N-Term]
High	High	Master Protein	P20073	Annexin A7 OS=Homo sapiens GN=ANXA7 PE=1 SV=3	0	0	45	25	488	25	1	488	52.7	5.68	13783	337.69	25	7	0	1.62834e+09	1.6506e+09	1.6739e+09	2.06625e+09	2.03131e+09	2.11078e+09	2.18474e+09	2.28403e+09	2.22343e+09
High	High	None	A6NEC2	Puromycin-sensitive aminopeptidase-like protein OS=Homo sapiens GN=NPEPPSL1 PE=2 SV=3	0	0	36	18	332	18	1	478	53.7	5.34	7477	337.51	18	7	0	8.58881e+08	8.15566e+08	8.16816e+08	9.7617e+08	1.03615e+09	1.057e+09	1.1551e+09	1.2144e+09	1.20507e+09
High	High	Master Protein	Q9NX46	Poly(ADP-ribose) glycohydrolase ARH3 OS=Homo sapiens GN=ADPRHL2 PE=1 SV=1	0	0	58	20	307	20	1	363	38.9	5.07	6923	337.43	17	12	0	1.96223e+08	1.90493e+08	1.87506e+08	2.10591e+08	2.25516e+08	2.17184e+08	2.48511e+08	2.5534e+08	2.44877e+08	Acetyl [N-Term; N-Term]
High	High	Master Protein	Q86VS8	Protein Hook homolog 3 OS=Homo sapiens GN=HOOK3 PE=1 SV=2	0	0	45	32	308	32	1	718	83.1	5.17	6988	337.29	31	16	0	1.26679e+08	1.31178e+08	1.26197e+08	1.45261e+08	1.44204e+08	1.41932e+08	1.58665e+08	1.54712e+08	1.62055e+08	Acetyl [N-Term]
High	High	Master Protein	Q9UBQ7	Glyoxylate reductase/hydroxypyruvate reductase OS=Homo sapiens GN=GRHPR PE=1 SV=1	0	0	60	17	295	17	1	328	35.6	7.39	7187	337.17	16	10	0	5.09791e+08	4.99196e+08	5.35295e+08	5.92564e+08	6.41279e+08	5.7948e+08	6.03108e+08	6.44755e+08	6.46588e+08
High	High	Master Protein	Q15813	Tubulin-specific chaperone E OS=Homo sapiens GN=TBCE PE=1 SV=1	0	0	76	31	302	30	1	527	59.3	6.76	6629	337.08	31	16	0	2.06241e+08	1.98446e+08	2.13706e+08	2.56554e+08	2.59301e+08	2.57934e+08	2.91255e+08	3.17609e+08	3.14173e+08	Acetyl [N-Term]
High	High	Master Protein	O14787	Transportin-2 OS=Homo sapiens GN=TNPO2 PE=1 SV=3	0	0	45	31	433	23	1	897	101.3	5.01	9601	336.63	31	15	8	5.64286e+08	5.19566e+08	5.23915e+08	6.04591e+08	6.75146e+08	6.2163e+08	6.18981e+08	5.91322e+08	5.86394e+08
High	High	Master Protein	Q5JTH9	RRP12-like protein OS=Homo sapiens GN=RRP12 PE=1 SV=2	0	0	47	51	443	50	1	1297	143.6	8.75	8680	336.33	50	18	0	4.18532e+08	4.29299e+08	4.36516e+08	6.16354e+08	6.07809e+08	6.0099e+08	5.86199e+08	6.07703e+08	6.1889e+08
High	High	Master Protein	Q9H6R4	Nucleolar protein 6 OS=Homo sapiens GN=NOL6 PE=1 SV=2	0	0	36	30	330	30	1	1146	127.5	7.64	8002	336.21	30	16	0	2.48909e+08	2.23455e+08	2.49595e+08	3.16577e+08	3.38758e+08	3.6846e+08	3.76476e+08	3.48539e+08	3.40196e+08
High	High	Master Protein	P40925	Malate dehydrogenase, cytoplasmic OS=Homo sapiens GN=MDH1 PE=1 SV=4	0	0	38	11	348	11	1	334	36.4	7.36	8057	335.64	11	4	0	1.57609e+09	1.53361e+09	1.57286e+09	1.88844e+09	2.02575e+09	2.04327e+09	1.99148e+09	2.19948e+09	2.15632e+09
High	High	Master Protein	Q9HD20	Manganese-transporting ATPase 13A1 OS=Homo sapiens GN=ATP13A1 PE=1 SV=2	0	0	48	43	380	43	1	1204	132.9	8.13	8412	335.49	43	18	0	2.66026e+08	2.69377e+08	2.753e+08	3.05007e+08	3.45259e+08	3.43956e+08	4.10357e+08	4.11104e+08	4.22227e+08	Acetyl [N-Term]
High	High	Master Protein	P08134	Rho-related GTP-binding protein RhoC OS=Homo sapiens GN=RHOC PE=1 SV=1	0	0	68	15	267	6	1	193	22	6.58	6347	335.42	14	7	10	7.36025e+08	7.92572e+08	7.49637e+08	8.92664e+08	9.12886e+08	9.66806e+08	1.12427e+09	1.09513e+09	1.08439e+09
High	High	Master Protein	Q12907	Vesicular integral-membrane protein VIP36 OS=Homo sapiens GN=LMAN2 PE=1 SV=1	0	0	57	17	264	17	1	356	40.2	6.95	4874	335.19	17	10	0	6.72234e+08	6.74745e+08	6.46044e+08	6.54424e+08	7.06373e+08	6.28677e+08	7.96016e+08	8.21067e+08	8.29271e+08
High	High	Master Protein	Q92917	G patch domain and KOW motifs-containing protein OS=Homo sapiens GN=GPKOW PE=1 SV=2	0	0	70	27	271	27	1	476	52.2	6.15	6421	334.8	27	16	0	1.75639e+08	1.88169e+08	1.84902e+08	3.30148e+08	3.40239e+08	3.28217e+08	1.72715e+08	1.72751e+08	1.69688e+08
High	High	Master Protein	P21291	Cysteine and glycine-rich protein 1 OS=Homo sapiens GN=CSRP1 PE=1 SV=3	0	0	68	12	328	12	1	193	20.6	8.57	8381	334.61	12	7	0	7.98021e+08	7.64226e+08	8.17548e+08	8.97795e+08	9.73025e+08	9.17531e+08	8.25751e+08	8.80742e+08	9.3438e+08
High	High	Master Protein	Q13616	Cullin-1 OS=Homo sapiens GN=CUL1 PE=1 SV=2	0	0	54	39	385	39	1	776	89.6	8	8841	334.3	36	23	0	3.50424e+08	3.30237e+08	3.56255e+08	3.8624e+08	4.11519e+08	4.26784e+08	4.37725e+08	4.76903e+08	4.83611e+08
High	High	Master Protein	O43719	HIV Tat-specific factor 1 OS=Homo sapiens GN=HTATSF1 PE=1 SV=1	0	0	57	42	469	42	1	755	85.8	4.4	11457	334.25	42	13	0	2.25706e+08	2.42011e+08	2.45017e+08	2.72909e+08	2.92594e+08	2.92594e+08	3.22944e+08	3.25497e+08	3.31943e+08	Acetyl [N-Term]
High	High	Master Protein	Q9BR76	Coronin-1B OS=Homo sapiens GN=CORO1B PE=1 SV=1	0	0	44	20	302	19	1	489	54.2	5.88	6360	334	20	9	1	8.59897e+08	7.95781e+08	8.63977e+08	9.72267e+08	1.05965e+09	1.0525e+09	1.04874e+09	1.07847e+09	1.10398e+09
High	High	Master Protein	Q9H6T3	RNA polymerase II-associated protein 3 OS=Homo sapiens GN=RPAP3 PE=1 SV=2	0	0	57	35	336	35	1	665	75.7	6.84	8209	333.86	35	20	0	2.24693e+08	2.16416e+08	2.29761e+08	2.9203e+08	3.05353e+08	3.05685e+08	3.69241e+08	3.57703e+08	3.66321e+08
High	High	Master Protein	P20618	Proteasome subunit beta type-1 OS=Homo sapiens GN=PSMB1 PE=1 SV=2	0	0	58	14	265	14	1	241	26.5	8.13	5331	333.84	14	8	0	8.7948e+08	8.03509e+08	8.19976e+08	9.07761e+08	1.0159e+09	1.01861e+09	9.93936e+08	9.63335e+08	9.9603e+08
High	High	Master Protein	Q9NUL3	Double-stranded RNA-binding protein Staufen homolog 2 OS=Homo sapiens GN=STAU2 PE=1 SV=1	0	0	53	24	272	22	1	570	62.6	9.61	6960	333.8	24	12	0	1.58639e+08	1.53085e+08	1.65264e+08	2.60144e+08	2.61988e+08	2.42291e+08	2.35262e+08	2.39062e+08	2.64967e+08
High	High	Master Protein	Q14677	Clathrin interactor 1 OS=Homo sapiens GN=CLINT1 PE=1 SV=1	0	0	30	18	334	18	1	625	68.2	6.42	7460	333.14	18	11	0	3.09233e+08	2.98801e+08	3.11598e+08	3.73941e+08	3.903e+08	4.17351e+08	4.44801e+08	4.34444e+08	4.8384e+08
High	High	Master Protein	Q9NYV4	Cyclin-dependent kinase 12 OS=Homo sapiens GN=CDK12 PE=1 SV=2	0	0	34	41	359	36	1	1490	164.1	9.44	8845	332.51	41	19	5	2.91933e+08	3.00262e+08	3.28923e+08	4.00475e+08	4.27195e+08	4.20216e+08	3.83133e+08	4.35177e+08	4.05797e+08
High	High	Master Protein	Q13098	COP9 signalosome complex subunit 1 OS=Homo sapiens GN=GPS1 PE=1 SV=4	0	0	47	24	388	24	1	491	55.5	6.74	8635	332.48	24	12	0	6.20993e+08	5.89067e+08	6.21979e+08	7.52427e+08	8.28167e+08	798076948	8.29234e+08	8.28667e+08	8.1783e+08
High	High	Master Protein	P48047	ATP synthase subunit O, mitochondrial OS=Homo sapiens GN=ATP5O PE=1 SV=1	0	0	67	13	260	13	1	213	23.3	9.96	6308	332.25	13	9	0	7.21093e+08	7.12809e+08	7.48611e+08	8.81724e+08	9.81525e+08	9.21259e+08	1.0754e+09	1.06534e+09	1.08635e+09
High	High	Master Protein	Q5TDH0	Protein DDI1 homolog 2 OS=Homo sapiens GN=DDI2 PE=1 SV=1	0	0	56	16	213	16	1	399	44.5	5.05	4462	331.93	16	11	0	1.81413e+08	1.73676e+08	1.79479e+08	1.83318e+08	1.95734e+08	1.9859e+08	2.16466e+08	2.20548e+08	2.12663e+08
High	High	Master Protein	Q9NX02	NACHT, LRR and PYD domains-containing protein 2 OS=Homo sapiens GN=NLRP2 PE=1 SV=1	0	0	39	34	347	30	1	1062	120.4	6.07	7854	331.64	34	14	5	1.86212e+08	1.8157e+08	1.84739e+08	2.2803e+08	2.4376e+08	2.42459e+08	2.25789e+08	2.41322e+08	2.64298e+08
High	High	Master Protein	Q13464	Rho-associated protein kinase 1 OS=Homo sapiens GN=ROCK1 PE=1 SV=1	0	0	50	68	470	62	1	1354	158.1	5.9	10032	331.34	68	21	6	2.8888e+08	2.66227e+08	2.79213e+08	3.46703e+08	3.62603e+08	3.59234e+08	4.069e+08	4.31265e+08	4.10577e+08
High	High	Master Protein	P55317	Hepatocyte nuclear factor 3-alpha OS=Homo sapiens GN=FOXA1 PE=1 SV=2	0	0	46	11	188	11	1	472	49.1	8.82	5326	331.26	11	9	0	1.67142e+08	1.634e+08	1.90441e+08	2.10443e+08	2.11328e+08	2.21589e+08	2.18373e+08	2.22771e+08	221676373
High	High	Master Protein	Q6ZNJ1	Neurobeachin-like protein 2 OS=Homo sapiens GN=NBEAL2 PE=1 SV=2	0	0	21	37	238	37	1	2754	302.3	6.38	4701	330.89	34	20	0	4.99179e+07	4.47117e+07	4.77693e+07	5.12527e+07	6.04583e+07	5.65311e+07	5.90618e+07	7.0793e+07	7.3842e+07
High	High	Master Protein	Q15833	Syntaxin-binding protein 2 OS=Homo sapiens GN=STXBP2 PE=1 SV=2	0	0	52	28	300	28	1	593	66.4	6.55	7891	330.89	27	16	0	2.23335e+08	2.1753e+08	2.26174e+08	2.57363e+08	3.01192e+08	2.86226e+08	3.09652e+08	3.18338e+08	3.37662e+08
High	High	Master Protein	P63208	S-phase kinase-associated protein 1 OS=Homo sapiens GN=SKP1 PE=1 SV=2	0	0	67	13	367	13	1	163	18.6	4.54	8045	330.78	13	8	0	6.84016e+08	6.43875e+08	6.74614e+08	9.68529e+08	9.05674e+08	9.33127e+08	1.03667e+09	1.03294e+09	1.13422e+09
High	High	Master Protein	Q96RL7	Vacuolar protein sorting-associated protein 13A OS=Homo sapiens GN=VPS13A PE=1 SV=2	0	0	25	62	373	62	1	3174	360	6.33	7828	330.5	60	25	0	9.04812e+07	8.92075e+07	9.0528e+07	1.15123e+08	1.21184e+08	1.24988e+08	1.25821e+08	1.2459e+08	1.31979e+08
High	High	Master Protein	Q96QR8	Transcriptional activator protein Pur-beta OS=Homo sapiens GN=PURB PE=1 SV=3	0	0	65	14	235	13	1	312	33.2	5.43	5274	330.1	14	7	0	1.60858e+08	1.76444e+08	1.48717e+08	1.79203e+08	2.47499e+08	146846499	2.55728e+08	2.66709e+08	2.71715e+08	Acetyl [N-Term]
High	High	Master Protein	Q9Y394	Dehydrogenase/reductase SDR family member 7 OS=Homo sapiens GN=DHRS7 PE=1 SV=1	0	0	49	14	356	14	1	339	38.3	8.32	8626	329.65	14	7	0	1.02642e+09	9.94258e+08	1.04071e+09	1.23901e+09	1.30707e+09	1.359e+09	7.22307e+08	8.07055e+08	8.34518e+08
High	High	Master Protein	Q9Y4P1	Cysteine protease ATG4B OS=Homo sapiens GN=ATG4B PE=1 SV=2	0	0	51	15	192	14	1	393	44.3	5.07	3504	329.56	15	11	1	8.4571e+07	8.67061e+07	8.94398e+07	9.37229e+07	1.03691e+08	1.02082e+08	1.16142e+08	1.17373e+08	1.13592e+08	Acetyl [N-Term]
High	High	Master Protein	Q8WWY3	U4/U6 small nuclear ribonucleoprotein Prp31 OS=Homo sapiens GN=PRPF31 PE=1 SV=2	0	0	58	23	311	23	1	499	55.4	5.78	6716	329.26	23	13	0	3.08381e+08	3.08828e+08	3.18943e+08	4.05399e+08	4.05761e+08	3.97972e+08	3.92015e+08	4.10611e+08	3.88933e+08
High	High	Master Protein	Q58FF8	Putative heat shock protein HSP 90-beta 2 OS=Homo sapiens GN=HSP90AB2P PE=1 SV=2	0	0	24	12	443	1	1	381	44.3	4.84	11221	329.23	12	5	0
High	High	Master Protein	O43432	Eukaryotic translation initiation factor 4 gamma 3 OS=Homo sapiens GN=EIF4G3 PE=1 SV=2	0	0	38	60	553	54	1	1585	176.5	5.38	13117	329.01	59	20	0	1.98264e+08	1.98596e+08	1.94749e+08	2.51869e+08	2.67411e+08	2.69897e+08	2.97175e+08	3.18268e+08	3.26912e+08
High	High	Master Protein	Q09161	Nuclear cap-binding protein subunit 1 OS=Homo sapiens GN=NCBP1 PE=1 SV=1	0	0	50	32	438	32	1	790	91.8	6.43	10252	328.9	32	16	0	4.46832e+08	4.16991e+08	4.4097e+08	4.63354e+08	5.12065e+08	5.16079e+08	5.41466e+08	5.66015e+08	5.61325e+08
High	High	Master Protein	P28482	Mitogen-activated protein kinase 1 OS=Homo sapiens GN=MAPK1 PE=1 SV=3	0	0	64	20	323	13	1	360	41.4	6.98	6635	328.88	20	11	0	4.0804e+08	4.03101e+08	4.36348e+08	4.76681e+08	5.22013e+08	5.33997e+08	4.41192e+08	4.40819e+08	4.82527e+08	Acetyl [N-Term]
High	High	Master Protein	Q9UH62	Armadillo repeat-containing X-linked protein 3 OS=Homo sapiens GN=ARMCX3 PE=1 SV=1	0	0	46	15	253	15	1	379	42.5	8.37	8779	328.86	15	7	0	1.27125e+08	1.19238e+08	1.30819e+08	1.41542e+08	1.4388e+08	1.50394e+08	1.77337e+08	1.77727e+08	1.79455e+08
High	High	Master Protein	Q86V81	THO complex subunit 4 OS=Homo sapiens GN=ALYREF PE=1 SV=3	0	0	47	12	247	12	1	257	26.9	11.15	5771	327.54	10	6	0	5.16567e+08	5.36577e+08	6.14172e+08	6.97675e+08	8.49292e+08	7.35206e+08	8.61816e+08	8.94337e+08	9.32496e+08	Acetyl [N-Term]
High	High	Master Protein	Q8WTW3	Conserved oligomeric Golgi complex subunit 1 OS=Homo sapiens GN=COG1 PE=1 SV=1	0	0	44	37	304	37	1	980	108.9	7.31	6885	327.14	37	12	0	2.0846e+08	1.88912e+08	2.10884e+08	2.40455e+08	3.09578e+08	2.75276e+08	3.84625e+08	4.03992e+08	3.64635e+08	Acetyl [N-Term; N-Term]
High	High	Master Protein	P61086	Ubiquitin-conjugating enzyme E2 K OS=Homo sapiens GN=UBE2K PE=1 SV=3	0	0	61	12	289	12	1	200	22.4	5.44	6671	326.94	12	8	0	4.59561e+08	4.71486e+08	4.59462e+08	4.92405e+08	5.53715e+08	490190103	4.55719e+08	5.26395e+08	4.70334e+08	Acetyl [N-Term]
High	High	Master Protein	Q12996	Cleavage stimulation factor subunit 3 OS=Homo sapiens GN=CSTF3 PE=1 SV=1	0	0	43	25	321	25	1	717	82.9	8.12	7259	326.86	25	10	0	2.88419e+08	2.80921e+08	2.89814e+08	3.52292e+08	3.86271e+08	3.7326e+08	3.94242e+08	4.36504e+08	4.2718e+08	Acetyl [N-Term]
High	High	Master Protein	P14678	Small nuclear ribonucleoprotein-associated proteins B and B' OS=Homo sapiens GN=SNRPB PE=1 SV=2	0	0	25	8	318	8	1	240	24.6	11.19	7509	326.69	8	3	0	1.17097e+09	1.15712e+09	1.23937e+09	1.51548e+09	1.45504e+09	1.54882e+09	1.52091e+09	1.6287e+09	1.64165e+09
High	High	Master Protein Candidate	P63162	Small nuclear ribonucleoprotein-associated protein N OS=Homo sapiens GN=SNRPN PE=1 SV=1	0	0	25	8	318	8	1	240	24.6	11.19	7509	326.69	8	3	0	1.17097e+09	1.15712e+09	1.23937e+09	1.51548e+09	1.45504e+09	1.54882e+09	1.52091e+09	1.6287e+09	1.64165e+09
High	High	Master Protein	P15531	Nucleoside diphosphate kinase A OS=Homo sapiens GN=NME1 PE=1 SV=1	0	0	70	10	395	5	1	152	17.1	6.19	9872	326.62	10	4	0	1.75314e+09	1.77209e+09	1.83533e+09	1.92023e+09	1.95612e+09	1.89522e+09	2.22212e+09	2.09849e+09	2.14558e+09
High	High	Master Protein	Q02818	Nucleobindin-1 OS=Homo sapiens GN=NUCB1 PE=1 SV=4	0	0	70	35	415	34	1	461	53.8	5.25	8781	326.33	35	16	0	5.52977e+08	5.51579e+08	5.5111e+08	6.38776e+08	6.15576e+08	6.377e+08	6.747e+08	6.93977e+08	6.93582e+08
High	High	Master Protein	Q96HE7	ERO1-like protein alpha OS=Homo sapiens GN=ERO1A PE=1 SV=2	0	0	60	21	264	20	1	468	54.4	5.68	6208	326.18	21	13	1	1.45678e+08	1.4146e+08	1.50404e+08	1.73478e+08	1.87081e+08	1.89243e+08	2.05822e+08	1.99651e+08	2.09683e+08
High	High	Master Protein	P53367	Arfaptin-1 OS=Homo sapiens GN=ARFIP1 PE=1 SV=2	0	0	64	19	252	18	1	373	41.7	6.7	5547	326.02	18	13	1	3.74457e+08	3.40295e+08	3.49778e+08	3.63865e+08	4.19105e+08	4.37043e+08	4.60128e+08	5.22333e+08	4.57307e+08
High	High	Master Protein	Q92805	Golgin subfamily A member 1 OS=Homo sapiens GN=GOLGA1 PE=1 SV=3	0	0	67	44	307	44	1	767	88.1	5.27	7000	325.84	40	20	0	1.63662e+08	1.5764e+08	1.74824e+08	1.59777e+08	1.79156e+08	1.8567e+08	2.2203e+08	2.27598e+08	2.38976e+08
High	High	Master Protein	P55011	Solute carrier family 12 member 2 OS=Homo sapiens GN=SLC12A2 PE=1 SV=1	0	0	28	26	214	26	1	1212	131.4	6.4	4863	325.65	25	12	0	6.88526e+07	7.34979e+07	7.6316e+07	8.03077e+07	9.62379e+07	8.60532e+07	1.16218e+08	1.26707e+08	1.29043e+08	Acetyl [N-Term]
High	High	Master Protein	Q03154	Aminoacylase-1 OS=Homo sapiens GN=ACY1 PE=1 SV=1	0	0	72	25	315	25	1	408	45.9	6.18	6852	325.53	25	10	0	5.39052e+08	5.29492e+08	5.64088e+08	7.30857e+08	7.73685e+08	8.08627e+08	8.52124e+08	9.57702e+08	9.6693e+08
High	High	Master Protein	P25789	Proteasome subunit alpha type-4 OS=Homo sapiens GN=PSMA4 PE=1 SV=1	0	0	56	11	297	11	1	261	29.5	7.72	7882	325.27	11	5	0	1.02426e+09	1.01959e+09	1.08421e+09	1.28759e+09	1.39214e+09	1.27234e+09	1.32767e+09	1.47768e+09	1.49477e+09
High	High	Master Protein	Q13619	Cullin-4A OS=Homo sapiens GN=CUL4A PE=1 SV=3	0	0	57	46	518	32	1	759	87.6	8.13	13667	325.17	45	16	0	3.95077e+08	4.10334e+08	3.99851e+08	5.1686e+08	5.31683e+08	5.29669e+08	6.18783e+08	6.39725e+08	6.38526e+08
High	High	Master Protein	Q96B70	Leukocyte receptor cluster member 9 OS=Homo sapiens GN=LENG9 PE=2 SV=2	0	0	67	22	192	22	1	501	53.1	7.84	4060	324.11	21	17	0	7.43977e+07	7.2591e+07	7.00703e+07	8.829e+07	8.91437e+07	8.67439e+07	1.07667e+08	1.11114e+08	1.12791e+08	Acetyl [N-Term]
High	High	Master Protein	Q9GZL7	Ribosome biogenesis protein WDR12 OS=Homo sapiens GN=WDR12 PE=1 SV=2	0	0	58	21	275	21	1	423	47.7	5.9	6168	323.98	20	8	0	3.9656e+08	3.66451e+08	3.96459e+08	4.49376e+08	4.38312e+08	4.35403e+08	5.46438e+08	5.45062e+08	5.54834e+08
High	High	Master Protein	Q96SI9	Spermatid perinuclear RNA-binding protein OS=Homo sapiens GN=STRBP PE=1 SV=1	0	0	53	38	425	32	1	672	73.6	8.72	9194	323.96	37	17	0	2.54501e+08	2.60451e+08	2.54597e+08	3.07386e+08	3.42464e+08	3.37236e+08	3.30719e+08	3.41268e+08	3.6611e+08
High	High	Master Protein	Q8WVB6	Chromosome transmission fidelity protein 18 homolog OS=Homo sapiens GN=CHTF18 PE=1 SV=1	0	0	47	33	263	32	1	975	107.3	7.21	5898	323.86	32	20	1	1.00283e+08	9.39465e+07	9.80353e+07	1.21711e+08	1.49676e+08	1.37519e+08	1.16568e+08	1.22919e+08	1.27438e+08
High	High	Master Protein	P62888	60S ribosomal protein L30 OS=Homo sapiens GN=RPL30 PE=1 SV=2	0	0	66	8	305	8	1	115	12.8	9.63	7194	323.66	8	4	0	1.93504e+09	1.91985e+09	1.95953e+09	2.68789e+09	2.46222e+09	2.52481e+09	2.69074e+09	2.73499e+09	2.67203e+09
High	High	None	Q9NQ39	Putative 40S ribosomal protein S10-like OS=Homo sapiens GN=RPS10P5 PE=5 SV=1	0	0	25	6	267	6	1	176	20.1	10.13	6750	323.59	6	2	0	1.04426e+09	1.04529e+09	1.21675e+09	1.45754e+09	1.60722e+09	1.874e+09	1.40874e+09	1.59644e+09	1.67156e+09
High	High	Master Protein	Q14746	Conserved oligomeric Golgi complex subunit 2 OS=Homo sapiens GN=COG2 PE=1 SV=1	0	0	62	40	375	40	1	738	83.2	6.62	9085	323.31	38	19	0	2.3142e+08	2.36829e+08	2.42417e+08	3.12909e+08	3.20016e+08	3.10222e+08	4.79974e+08	5.37096e+08	5.35227e+08
High	High	Master Protein	Q8TCS8	Polyribonucleotide nucleotidyltransferase 1, mitochondrial OS=Homo sapiens GN=PNPT1 PE=1 SV=2	0	0	45	29	300	29	1	783	85.9	7.77	6730	323.27	29	17	0	1.87421e+08	1.84171e+08	1.92234e+08	2.30424e+08	2.2339e+08	2.41285e+08	3.07319e+08	3.16008e+08	3.06189e+08
High	High	Master Protein	Q93034	Cullin-5 OS=Homo sapiens GN=CUL5 PE=1 SV=4	0	0	45	37	346	37	1	780	90.9	7.94	8003	323.16	37	13	0	3.24616e+08	3.06544e+08	3.10966e+08	4.22813e+08	4.31887e+08	4.26148e+08	3.80385e+08	3.59813e+08	3.77705e+08
High	High	Master Protein	P07858	Cathepsin B OS=Homo sapiens GN=CTSB PE=1 SV=3	0	0	37	10	238	10	1	339	37.8	6.3	6147	323.09	10	6	0	2.9923e+08	2.79729e+08	2.75685e+08	3.18328e+08	3.79778e+08	3.53879e+08	3.88345e+08	4.20071e+08	4.05933e+08
High	High	Master Protein	O76031	ATP-dependent Clp protease ATP-binding subunit clpX-like, mitochondrial OS=Homo sapiens GN=CLPX PE=1 SV=2	0	0	55	30	328	30	1	633	69.2	7.58	7017	322.73	29	19	0	2.91423e+08	3.18288e+08	3.25094e+08	3.80948e+08	4.01655e+08	3.96633e+08	5.80072e+08	5.68478e+08	5.87758e+08
High	High	Master Protein	Q96T37	Putative RNA-binding protein 15 OS=Homo sapiens GN=RBM15 PE=1 SV=2	0	0	45	35	339	34	1	977	107.1	10.08	7764	322.41	34	16	1	1.77095e+08	1.79621e+08	1.68704e+08	2.25965e+08	2.4161e+08	2.31034e+08	2.33903e+08	2.36429e+08	2.33092e+08
High	High	Master Protein	Q16539	Mitogen-activated protein kinase 14 OS=Homo sapiens GN=MAPK14 PE=1 SV=3	0	0	67	20	256	19	1	360	41.3	5.78	5649	322.35	20	11	1	2.09136e+08	1.97813e+08	1.95424e+08	2.57977e+08	2.53398e+08	2.46929e+08	3.12821e+08	3.02255e+08	2.95576e+08	Acetyl [N-Term]
High	High	Master Protein	Q15003	Condensin complex subunit 2 OS=Homo sapiens GN=NCAPH PE=1 SV=3	0	0	61	36	352	36	1	741	82.5	5.06	9516	322.16	34	17	0	2.64526e+08	2.75126e+08	2.47812e+08	2.63119e+08	2.95537e+08	2.71115e+08	3.11506e+08	3.15487e+08	3.25564e+08
High	High	Master Protein	Q9NRY4	Rho GTPase-activating protein 35 OS=Homo sapiens GN=ARHGAP35 PE=1 SV=3	0	0	38	43	309	41	1	1499	170.4	6.64	6414	322.11	43	17	2	9.99341e+07	1.05469e+08	1.02162e+08	1.48773e+08	1.54524e+08	1.45651e+08	1.5265e+08	1.53876e+08	1.55942e+08
High	High	Master Protein	Q6UN15	Pre-mRNA 3'-end-processing factor FIP1 OS=Homo sapiens GN=FIP1L1 PE=1 SV=1	0	0	41	20	222	20	1	594	66.5	5.59	5617	321.94	17	14	0	1.14534e+08	1.06332e+08	1.14793e+08	1.49736e+08	1.50447e+08	1.46438e+08	1.80443e+08	1.59782e+08	1.69387e+08	Acetyl [N-Term]
High	High	Master Protein	P05141	ADP/ATP translocase 2 OS=Homo sapiens GN=SLC25A5 PE=1 SV=7	0	0	52	23	648	10	1	298	32.8	9.69	13733	321.72	23	11	0	8.83883e+08	9.38202e+08	9.33201e+08	1.12765e+09	1.14109e+09	1155098270	1.37455e+09	1.39123e+09	1.4746e+09	Acetyl [N-Term; N-Term]
High	High	Master Protein	Q13823	Nucleolar GTP-binding protein 2 OS=Homo sapiens GN=GNL2 PE=1 SV=1	0	0	49	33	358	33	1	731	83.6	9.25	8255	321.71	32	14	0	3.83063e+08	3.6162e+08	4.02499e+08	5.11488e+08	5.48681e+08	5.25521e+08	5.93259e+08	5.99007e+08	5.76867e+08
High	High	Master Protein	P78316	Nucleolar protein 14 OS=Homo sapiens GN=NOP14 PE=1 SV=3	0	0	36	33	309	33	1	857	97.6	7.58	6360	321.56	32	20	0	1.62227e+08	1.55182e+08	1.54873e+08	1.98594e+08	1.93942e+08	1.98377e+08	2.00727e+08	2.08175e+08	2.18367e+08
High	High	Master Protein	Q70EL1	Inactive ubiquitin carboxyl-terminal hydrolase 54 OS=Homo sapiens GN=USP54 PE=1 SV=4	0	0	44	54	359	54	1	1684	187.3	7.28	7730	321.43	53	25	0	1.30952e+08	1.20257e+08	1.26542e+08	1.68725e+08	1.66378e+08	1.60339e+08	1.88354e+08	2.00155e+08	2.01254e+08
High	High	Master Protein	O60826	Coiled-coil domain-containing protein 22 OS=Homo sapiens GN=CCDC22 PE=1 SV=1	0	0	55	27	279	26	1	627	70.7	6.74	5328	321.35	27	16	0	1.23194e+08	1.23598e+08	1.21339e+08	1.46592e+08	1.56481e+08	1.52891e+08	1.72965e+08	1.66553e+08	1.73791e+08
High	High	Master Protein	Q99447	Ethanolamine-phosphate cytidylyltransferase OS=Homo sapiens GN=PCYT2 PE=1 SV=1	0	0	60	21	271	21	1	389	43.8	6.92	7599	321.26	20	11	0	2.36945e+08	2.52442e+08	2.53636e+08	2.71449e+08	2.66441e+08	2.76718e+08	3.28116e+08	3.40662e+08	3.4998e+08
High	High	Master Protein	P51812	Ribosomal protein S6 kinase alpha-3 OS=Homo sapiens GN=RPS6KA3 PE=1 SV=1	0	0	59	39	369	28	1	740	83.7	6.89	8104	321.22	39	16	0	2.14722e+08	2.18806e+08	2.22636e+08	2.49213e+08	2.71013e+08	2.73064e+08	3.08906e+08	3.21824e+08	3.1248e+08
High	High	Master Protein	Q99700	Ataxin-2 OS=Homo sapiens GN=ATXN2 PE=1 SV=2	0	0	31	31	332	30	1	1313	140.2	9.57	8520	321.06	31	15	0	1.81909e+08	1.76379e+08	1.84412e+08	1.99389e+08	2.06508e+08	2.16394e+08	2.81959e+08	2.87478e+08	2.85301e+08
High	High	Master Protein	O75146	Huntingtin-interacting protein 1-related protein OS=Homo sapiens GN=HIP1R PE=1 SV=2	0	0	47	45	414	43	1	1068	119.3	6.67	10269	320.94	45	18	2	2.65189e+08	2.44107e+08	2.65717e+08	3.06346e+08	3.16822e+08	3.16867e+08	3.4487e+08	3.47063e+08	3.78365e+08
High	High	Master Protein	Q92878	DNA repair protein RAD50 OS=Homo sapiens GN=RAD50 PE=1 SV=1	0	0	50	69	531	69	1	1312	153.8	6.89	12600	320.7	68	19	0	5.7931e+08	5.34526e+08	5.79262e+08	6.87743e+08	7.12267e+08	6.98733e+08	7.56814e+08	7.71038e+08	7.82307e+08
High	High	Master Protein	Q6ZRV2	Protein FAM83H OS=Homo sapiens GN=FAM83H PE=1 SV=3	0	0	44	36	228	36	1	1179	127	6.98	5741	320.55	34	21	0	5.98145e+07	5.98833e+07	5.72423e+07	7.19844e+07	6.58018e+07	7.36137e+07	6.1959e+07	6.11591e+07	6.02155e+07
High	High	Master Protein	P22061	Protein-L-isoaspartate(D-aspartate) O-methyltransferase OS=Homo sapiens GN=PCMT1 PE=1 SV=4	0	0	57	11	284	11	1	227	24.6	7.21	6765	320.39	11	8	0	4.38867e+08	3.88013e+08	3.90989e+08	4.97846e+08	5.48932e+08	5.02498e+08	5.62941e+08	5.96747e+08	560303649
High	High	Master Protein	Q13206	Probable ATP-dependent RNA helicase DDX10 OS=Homo sapiens GN=DDX10 PE=1 SV=2	0	0	45	40	284	40	1	875	100.8	8.63	7067	320.26	38	18	0	124254501	1.27251e+08	1.29363e+08	1.4622e+08	1.48917e+08	1.56245e+08	1.22419e+08	1.34137e+08	1.28484e+08
High	High	Master Protein	A2RRP1	Neuroblastoma-amplified sequence OS=Homo sapiens GN=NBAS PE=1 SV=2	0	0	29	56	364	56	1	2371	268.4	5.96	8188	320.08	55	20	0	1.08755e+08	1.07108e+08	1.13194e+08	1.45541e+08	1.51332e+08	1.49248e+08	1.54023e+08	1.54417e+08	1.48034e+08
High	High	Master Protein	Q9H9B4	Sideroflexin-1 OS=Homo sapiens GN=SFXN1 PE=1 SV=4	0	0	56	17	326	15	1	322	35.6	9.07	7638	319.92	17	8	2	7.45743e+08	7.0957e+08	7.0585e+08	8.20195e+08	8.03153e+08	7.91368e+08	1.03094e+09	9.93066e+08	1.04387e+09
High	High	Master Protein	Q9UKK9	ADP-sugar pyrophosphatase OS=Homo sapiens GN=NUDT5 PE=1 SV=1	0	0	86	13	310	13	1	219	24.3	4.94	6827	319.79	13	9	0	3.6557e+08	3.47186e+08	3.63029e+08	3.9074e+08	3.89093e+08	4.12212e+08	4.36033e+08	4.33875e+08	4.22515e+08	Acetyl [N-Term]
High	High	Master Protein	P18858	DNA ligase 1 OS=Homo sapiens GN=LIG1 PE=1 SV=1	0	0	44	32	276	32	1	919	101.7	5.62	5888	319.52	31	19	0	1.28887e+08	1.12476e+08	1.23379e+08	1.13317e+08	1.20129e+08	1.16099e+08	1.18538e+08	1.24587e+08	1.22294e+08
High	High	Master Protein	P48163	NADP-dependent malic enzyme OS=Homo sapiens GN=ME1 PE=1 SV=1	0	0	59	27	357	27	1	572	64.1	6.13	7989	319.36	27	11	0	5.42844e+08	5.15712e+08	5.50735e+08	7.55028e+08	7.46748e+08	7.37328e+08	8.27493e+08	8.8025e+08	8.9213e+08
High	High	Master Protein	Q7L5N1	COP9 signalosome complex subunit 6 OS=Homo sapiens GN=COPS6 PE=1 SV=1	0	0	55	13	243	13	1	327	36.1	5.73	4904	319.29	13	9	0	4.4068e+08	4.5801e+08	4.43455e+08	5.19204e+08	5.52598e+08	5.79159e+08	5.6186e+08	5.53075e+08	5.46259e+08
High	High	Master Protein	O60343	TBC1 domain family member 4 OS=Homo sapiens GN=TBC1D4 PE=1 SV=2	0	0	38	39	300	38	1	1298	146.5	7.01	7523	319.27	37	14	1	8.19841e+07	8.1613e+07	8.14355e+07	1.16368e+08	1.23864e+08	1.2164e+08	1.37762e+08	1.28046e+08	1.25319e+08	Acetyl [N-Term]
High	High	Master Protein	P62995	Transformer-2 protein homolog beta OS=Homo sapiens GN=TRA2B PE=1 SV=1	0	0	50	17	289	15	1	288	33.6	11.25	5863	319.26	17	7	3	7.24029e+08	6.96584e+08	6.68653e+08	8.69067e+08	8.86431e+08	9.0941e+08	8.08104e+08	8.85878e+08	8.00527e+08	Acetyl [N-Term]
High	High	Master Protein	P33316	Deoxyuridine 5'-triphosphate nucleotidohydrolase, mitochondrial OS=Homo sapiens GN=DUT PE=1 SV=4	0	0	54	14	260	14	1	252	26.5	9.36	5895	319.1	14	9	0	6.71639e+08	6.79875e+08	7.065e+08	6.1021e+08	6.42964e+08	6.37423e+08	6.31337e+08	6.18659e+08	6.39812e+08
High	High	Master Protein	Q6ZVM7	TOM1-like protein 2 OS=Homo sapiens GN=TOM1L2 PE=1 SV=1	0	0	52	21	261	21	1	507	55.5	4.79	6202	318.73	20	11	0	1.41139e+08	1.41868e+08	1.5878e+08	1.82681e+08	1.8385e+08	1.78957e+08	1.90718e+08	1.98117e+08	2.08374e+08
High	High	Master Protein	A2RTX5	Probable threonine--tRNA ligase 2, cytoplasmic OS=Homo sapiens GN=TARSL2 PE=1 SV=1	0	0	45	30	282	26	1	802	92.6	6.05	6313	318.59	27	14	0	1.0853e+08	1.0797e+08	1.12469e+08	1.61031e+08	1.60873e+08	1.61292e+08	1.84049e+08	1.80813e+08	1.80658e+08	Acetyl [N-Term]
High	High	Master Protein	O75362	Zinc finger protein 217 OS=Homo sapiens GN=ZNF217 PE=1 SV=1	0	0	45	33	296	33	1	1048	115.2	8.48	7240	318.52	33	17	0	1.22232e+08	1.16736e+08	1.24e+08	1.33619e+08	1.22129e+08	1.39489e+08	1.61494e+08	1.73945e+08	1.8044e+08
High	High	Master Protein	Q15185	Prostaglandin E synthase 3 OS=Homo sapiens GN=PTGES3 PE=1 SV=1	0	0	51	9	273	9	1	160	18.7	4.54	6412	318.48	9	5	0	2.89511e+09	2.97672e+09	3.16419e+09	3.00461e+09	3.47432e+09	3.27455e+09	3.70953e+09	4.00625e+09	3.95414e+09
High	High	Master Protein	Q8NFW8	N-acylneuraminate cytidylyltransferase OS=Homo sapiens GN=CMAS PE=1 SV=2	0	0	47	17	262	17	1	434	48.3	7.93	5256	318.47	17	11	0	1.35654e+08	1.30184e+08	1.3653e+08	2.01964e+08	2.06332e+08	2.18502e+08	2.19179e+08	2.13683e+08	2.27327e+08
High	High	Master Protein	Q9P2K8	eIF-2-alpha kinase GCN2 OS=Homo sapiens GN=EIF2AK4 PE=1 SV=3	0	0	34	46	311	46	1	1649	186.8	6.28	6705	318.44	45	18	0	1.4475e+08	1.44695e+08	1.44977e+08	1.77264e+08	1.86116e+08	1.76239e+08	1.85855e+08	2.02511e+08	2.04419e+08
High	High	Master Protein	P23634	Plasma membrane calcium-transporting ATPase 4 OS=Homo sapiens GN=ATP2B4 PE=1 SV=2	0	0	28	28	278	17	1	1241	137.8	6.6	6481	318.36	27	15	0	5.43284e+07	5.80025e+07	6.84525e+07	6.7715e+07	7.49907e+07	7.65801e+07	9.14504e+07	9.10881e+07	9.98533e+07
High	High	Master Protein	Q5SW79	Centrosomal protein of 170 kDa OS=Homo sapiens GN=CEP170 PE=1 SV=1	0	0	31	37	268	37	1	1584	175.2	7.11	7474	318.33	35	18	0	6.03221e+07	5.91437e+07	6.85626e+07	6.8374e+07	6.62896e+07	7.44171e+07	6.91369e+07	8.18139e+07	7.27821e+07	Acetyl [N-Term]
High	High	Master Protein	Q5VW32	BRO1 domain-containing protein BROX OS=Homo sapiens GN=BROX PE=1 SV=1	0	0	48	15	245	15	1	411	46.4	7.65	5037	318.16	15	8	0	2.66031e+08	2.5971e+08	2.73656e+08	3.76522e+08	3.76604e+08	3.66712e+08	3.31334e+08	3.54954e+08	3.48928e+08
High	High	Master Protein	O43149	Zinc finger ZZ-type and EF-hand domain-containing protein 1 OS=Homo sapiens GN=ZZEF1 PE=1 SV=6	0	0	29	62	374	62	1	2961	330.9	5.95	8409	317.84	61	32	0	9.72513e+07	1.02319e+08	1.02361e+08	1.36776e+08	1.36252e+08	1.36044e+08	1.58293e+08	1.62914e+08	1.59799e+08
High	High	Master Protein	Q9Y6H1	Coiled-coil-helix-coiled-coil-helix domain-containing protein 2 OS=Homo sapiens GN=CHCHD2 PE=1 SV=1	0	0	34	4	192	4	1	151	15.5	9.22	3788	317.32	4	3	0	192143657	2.19246e+08	2.21124e+08	2.74845e+08	3.23913e+08	3.06942e+08	3.36909e+08	3.82585e+08	3.7405e+08
High	High	None	Q5T1J5	Putative coiled-coil-helix-coiled-coil-helix domain-containing protein CHCHD2P9, mitochondrial OS=Homo sapiens GN=CHCHD2P9 PE=5 SV=1	0	0	27	3	180	3	1	151	15.5	9.89	3449	317.32	3	3	0	1.30581e+08	1.54494e+08	1.45979e+08	1.9185e+08	2.0047e+08	1.90775e+08	2.31029e+08	2.46919e+08	2.44836e+08
High	High	Master Protein	Q92620	Pre-mRNA-splicing factor ATP-dependent RNA helicase PRP16 OS=Homo sapiens GN=DHX38 PE=1 SV=2	0	0	47	55	457	54	1	1227	140.4	6.54	11806	317.2	54	21	2	2.27302e+08	2.30079e+08	2.31473e+08	2.83938e+08	2.76679e+08	2.84375e+08	3.27102e+08	3.26359e+08	3.31662e+08	Acetyl [N-Term]
High	High	Master Protein	O14745	Na(+)/H(+) exchange regulatory cofactor NHE-RF1 OS=Homo sapiens GN=SLC9A3R1 PE=1 SV=4	0	0	81	27	310	27	1	358	38.8	5.77	8139	317.17	24	13	0	8.32835e+08	8.6446e+08	9.46724e+08	1.09575e+09	1163075358	1.24281e+09	1.14813e+09	1.22794e+09	1.23128e+09	Acetyl [N-Term]
High	High	Master Protein	Q9H1E3	Nuclear ubiquitous casein and cyclin-dependent kinase substrate 1 OS=Homo sapiens GN=NUCKS1 PE=1 SV=1	0	0	44	12	395	12	1	243	27.3	5.08	10516	316.88	12	5	0	4.38619e+08	4.16113e+08	4.03044e+08	6.43327e+08	4.95494e+08	4.06417e+08	5.6791e+08	6.60978e+08	4.77599e+08
High	High	Master Protein	Q8IZP2	Putative protein FAM10A4 OS=Homo sapiens GN=ST13P4 PE=5 SV=1	0	0	46	9	220	1	1	240	27.4	5.08	3867	316.8	9	5	0
High	High	Master Protein	Q9BW92	Threonine--tRNA ligase, mitochondrial OS=Homo sapiens GN=TARS2 PE=1 SV=1	0	0	55	27	279	27	1	718	81	7.3	5731	316.69	27	13	0	1.69392e+08	1.58081e+08	1.57681e+08	2.04641e+08	2.01367e+08	2.04921e+08	2.40409e+08	2.50131e+08	2.55306e+08
High	High	Master Protein	Q14527	Helicase-like transcription factor OS=Homo sapiens GN=HLTF PE=1 SV=2	0	0	62	51	409	51	1	1009	113.9	8.6	8947	316.64	50	19	0	2.13095e+08	2.08007e+08	2.12159e+08	2.25554e+08	2.11837e+08	2.17571e+08	2.07108e+08	2.12436e+08	2.1315e+08
High	High	Master Protein	A3KN83	Protein strawberry notch homolog 1 OS=Homo sapiens GN=SBNO1 PE=1 SV=1	0	0	41	41	339	36	1	1393	154.2	7.88	7865	316.59	40	19	4	1.47158e+08	1.38534e+08	1.5418e+08	1.53523e+08	1.61481e+08	1.72665e+08	1.78915e+08	1.88159e+08	1.85899e+08
High	High	Master Protein	Q9NZN5	Rho guanine nucleotide exchange factor 12 OS=Homo sapiens GN=ARHGEF12 PE=1 SV=1	0	0	37	42	309	42	1	1544	173.1	5.74	7707	316.15	42	18	0	9.5968e+07	1.03938e+08	9.7294e+07	1.82683e+08	1.97666e+08	1.85246e+08	2.21035e+08	2.24291e+08	2.05737e+08	Acetyl [N-Term]
High	High	Master Protein	Q13796	Protein Shroom2 OS=Homo sapiens GN=SHROOM2 PE=1 SV=1	0	0	50	56	360	54	1	1616	176.3	7.09	8497	315.35	54	22	2	1.11688e+08	1.13927e+08	1.20349e+08	1.26607e+08	1.36879e+08	1.38266e+08	1.67342e+08	1.72825e+08	1.73296e+08
High	High	Master Protein	Q9UKL0	REST corepressor 1 OS=Homo sapiens GN=RCOR1 PE=1 SV=2	0	0	51	22	266	18	1	485	53.3	7.03	5971	314.8	20	15	5	1.41115e+08	1.51044e+08	1.55803e+08	1.51978e+08	1.67749e+08	1.74388e+08	2.01623e+08	2.04718e+08	2.05359e+08
High	High	Master Protein	Q01085	Nucleolysin TIAR OS=Homo sapiens GN=TIAL1 PE=1 SV=1	0	0	51	17	293	14	1	375	41.6	7.74	6687	314.57	17	9	2	3.63061e+08	3.71075e+08	3.9081e+08	4.40104e+08	5.12619e+08	4.60477e+08	5.17392e+08	5.36446e+08	5.74807e+08	Acetyl [N-Term; N-Term]
High	High	Master Protein	O94776	Metastasis-associated protein MTA2 OS=Homo sapiens GN=MTA2 PE=1 SV=1	0	0	56	39	385	35	1	668	75	9.66	8166	314.29	39	13	4	5.09824e+08	5.16157e+08	5.15215e+08	5.76759e+08	5.72034e+08	5.8535e+08	5.47209e+08	5.51844e+08	5.63012e+08
High	High	Master Protein	P61019	Ras-related protein Rab-2A OS=Homo sapiens GN=RAB2A PE=1 SV=1	0	0	84	17	285	8	1	212	23.5	6.54	6061	313.41	17	10	10	5.5133e+08	5.14887e+08	5.43642e+08	6.43904e+08	6.62857e+08	6.54155e+08	7.44229e+08	7.32719e+08	7.60701e+08	Acetyl [N-Term]
High	High	Master Protein	Q86W56	Poly(ADP-ribose) glycohydrolase OS=Homo sapiens GN=PARG PE=1 SV=1	0	0	45	31	281	31	1	976	111	6.43	6440	313.02	31	15	0	7.8989e+07	7.61458e+07	7.70481e+07	9.32962e+07	8.84284e+07	9.83844e+07	8.77016e+07	9.35639e+07	9.58201e+07
High	High	Master Protein	O95714	E3 ubiquitin-protein ligase HERC2 OS=Homo sapiens GN=HERC2 PE=1 SV=2	0	0	17	58	304	58	1	4834	526.9	6.28	6940	312.89	56	26	0	5.51293e+07	5.37761e+07	5.80443e+07	6.81925e+07	7.25667e+07	7.71976e+07	9.16595e+07	9.56391e+07	1.06438e+08
High	High	Master Protein	P49821	NADH dehydrogenase [ubiquinone] flavoprotein 1, mitochondrial OS=Homo sapiens GN=NDUFV1 PE=1 SV=4	0	0	69	27	320	27	1	464	50.8	8.21	7060	312.89	27	11	0	2.35314e+08	2.48364e+08	2.28842e+08	3.08652e+08	3.13849e+08	3.27988e+08	4.06959e+08	4.12482e+08	4.24421e+08
High	High	Master Protein	Q9UGP8	Translocation protein SEC63 homolog OS=Homo sapiens GN=SEC63 PE=1 SV=2	0	0	35	28	312	28	1	760	87.9	5.31	6849	312.81	28	15	0	2.2012e+08	2.05967e+08	2.22128e+08	2.65599e+08	2.57764e+08	2.79045e+08	3.27678e+08	3.51168e+08	3.47165e+08
High	High	Master Protein	P55196	Afadin OS=Homo sapiens GN=AFDN PE=1 SV=3	0	0	33	44	305	44	1	1824	206.7	6.47	7079	312.64	43	19	0	9.32899e+07	8.81643e+07	9.41734e+07	1.04084e+08	1.0991e+08	1.20562e+08	1.23044e+08	1.23436e+08	1.39392e+08
High	High	Master Protein	Q15907	Ras-related protein Rab-11B OS=Homo sapiens GN=RAB11B PE=1 SV=4	0	0	63	14	299	13	1	218	24.5	5.94	6319	312.12	14	4	1	1.23429e+09	1.3427e+09	1.41631e+09	1.4625e+09	1.62481e+09	1.60525e+09	1.70194e+09	1.88635e+09	1.86156e+09	Acetyl [N-Term]
High	High	Master Protein	O15511	Actin-related protein 2/3 complex subunit 5 OS=Homo sapiens GN=ARPC5 PE=1 SV=3	0	0	58	8	218	7	1	151	16.3	5.67	5784	312.08	8	6	0	1.81615e+08	1.48823e+08	1.58572e+08	1.67838e+08	148129865	1.54777e+08	1.42772e+08	1.39951e+08	1.42858e+08
High	High	Master Protein	P62314	Small nuclear ribonucleoprotein Sm D1 OS=Homo sapiens GN=SNRPD1 PE=1 SV=1	0	0	38	4	197	4	1	119	13.3	11.56	3958	311.76	4	4	0	4.43393e+08	4.14463e+08	4.68979e+08	5.37088e+08	5.39946e+08	5.73889e+08	6.40129e+08	5.82547e+08	5.85034e+08
High	High	Master Protein	O00499	Myc box-dependent-interacting protein 1 OS=Homo sapiens GN=BIN1 PE=1 SV=1	0	0	42	19	242	18	1	593	64.7	5.06	4573	311.13	19	11	1	1.91702e+08	1.9371e+08	1.80985e+08	2.35612e+08	2.22745e+08	2.32649e+08	2.64718e+08	2.71705e+08	2.59206e+08
High	High	Master Protein	Q15428	Splicing factor 3A subunit 2 OS=Homo sapiens GN=SF3A2 PE=1 SV=2	0	0	38	17	276	17	1	464	49.2	9.64	6839	310.93	17	7	0	7.14918e+08	6.95137e+08	7.42133e+08	8.73038e+08	8.52364e+08	8.00291e+08	797731034	8.92381e+08	8.86907e+08	Acetyl [N-Term]
High	High	Master Protein	P23258	Tubulin gamma-1 chain OS=Homo sapiens GN=TUBG1 PE=1 SV=2	0	0	70	25	266	25	1	451	51.1	6.14	5320	310.9	25	14	0	2.30819e+08	2.23895e+08	2.28375e+08	2.71772e+08	2.79424e+08	2.87105e+08	2.89669e+08	2.8019e+08	2.90167e+08
High	High	Master Protein	Q9Y5L4	Mitochondrial import inner membrane translocase subunit Tim13 OS=Homo sapiens GN=TIMM13 PE=1 SV=1	0	0	78	7	324	7	1	95	10.5	8.18	9106	310.37	7	4	0	1.20368e+09	1.17532e+09	1.21684e+09	1.51675e+09	1.52831e+09	1.53493e+09	1.61925e+09	1.64953e+09	1.67549e+09	Acetyl [N-Term]
High	High	Master Protein	O75607	Nucleoplasmin-3 OS=Homo sapiens GN=NPM3 PE=1 SV=3	0	0	60	6	201	6	1	178	19.3	4.63	5495	310.23	6	5	0	3.28598e+08	3.42908e+08	3.63492e+08	4.15527e+08	4.50741e+08	4.77449e+08	4.72286e+08	4.66404e+08	5.09247e+08	Acetyl [N-Term]
High	High	Master Protein	Q14558	Phosphoribosyl pyrophosphate synthase-associated protein 1 OS=Homo sapiens GN=PRPSAP1 PE=1 SV=2	0	0	55	16	243	14	1	356	39.4	7.2	5659	309.86	16	11	0	1.16374e+08	1.37918e+08	1.25314e+08	1.43912e+08	1.47602e+08	1.47636e+08	1.68633e+08	1.46367e+08	1.59127e+08
High	High	Master Protein	Q9UGU0	Transcription factor 20 OS=Homo sapiens GN=TCF20 PE=1 SV=3	0	0	39	46	264	46	1	1960	211.6	9.04	5991	309.76	44	24	0	3.97854e+07	3.94482e+07	4.19308e+07	5.03027e+07	5.2957e+07	5.68916e+07	4.63777e+07	4.52595e+07	4.78558e+07
High	High	Master Protein	P30042	ES1 protein homolog, mitochondrial OS=Homo sapiens GN=C21orf33 PE=1 SV=3	0	0	58	13	292	13	1	268	28.2	8.27	6981	309.7	13	8	0	4.76705e+08	4.2956e+08	5.11153e+08	7.0306e+08	6.68672e+08	679876163	8.22083e+08	8.44743e+08	8.56443e+08
High	High	Master Protein	Q9Y5Z4	Heme-binding protein 2 OS=Homo sapiens GN=HEBP2 PE=1 SV=1	0	0	61	10	242	10	1	205	22.9	4.63	4767	309.49	10	4	0	8.16948e+08	7.93568e+08	8.17925e+08	9.01197e+08	9.48876e+08	9.23219e+08	1.10585e+09	1.06275e+09	1.04741e+09	Acetyl [N-Term]
High	High	Master Protein	Q14687	Genetic suppressor element 1 OS=Homo sapiens GN=GSE1 PE=1 SV=3	0	0	47	39	275	39	1	1217	136.1	7.74	6138	309.39	37	16	0	1.23726e+08	1.17806e+08	1.1367e+08	1.43782e+08	2.11104e+08	146395140	1.54051e+08	2.10192e+08	1.52537e+08
High	High	Master Protein	P53365	Arfaptin-2 OS=Homo sapiens GN=ARFIP2 PE=1 SV=1	0	0	62	15	244	14	1	341	37.8	6.04	5045	309.11	15	6	0	1.14203e+08	1.19289e+08	1.23107e+08	1.70058e+08	1.63814e+08	1.68059e+08	1.6739e+08	1.794e+08	1.80171e+08
High	High	Master Protein	P14735	Insulin-degrading enzyme OS=Homo sapiens GN=IDE PE=1 SV=4	0	0	54	45	433	45	1	1019	117.9	6.61	8901	308.98	43	20	0	6.74005e+08	6.3654e+08	6.64049e+08	7.55755e+08	8.07397e+08	7.62808e+08	8.93325e+08	9.26616e+08	9.55198e+08
High	High	Master Protein	Q8TAT6	Nuclear protein localization protein 4 homolog OS=Homo sapiens GN=NPLOC4 PE=1 SV=3	0	0	62	33	320	33	1	608	68.1	6.38	7172	308.88	33	11	0	5.47052e+08	5.26514e+08	5.48146e+08	6.28654e+08	6.49572e+08	6.49954e+08	6.90776e+08	7.88822e+08	7.72931e+08	Acetyl [N-Term]
High	High	Master Protein	O00303	Eukaryotic translation initiation factor 3 subunit F OS=Homo sapiens GN=EIF3F PE=1 SV=1	0	0	55	16	310	16	1	357	37.5	5.45	7394	308.38	16	6	0	9.21726e+08	8.55682e+08	9.70936e+08	1.09866e+09	1.19317e+09	1.19005e+09	1.30731e+09	1.30452e+09	1.36974e+09
High	High	Master Protein	O43660	Pleiotropic regulator 1 OS=Homo sapiens GN=PLRG1 PE=1 SV=1	0	0	66	29	293	29	1	514	57.2	9.17	6048	308.33	29	11	0	3.10375e+08	3.41261e+08	3.45514e+08	4.09131e+08	4.43785e+08	4.32271e+08	4.08853e+08	4.21363e+08	3.90862e+08
High	High	Master Protein	P38117	Electron transfer flavoprotein subunit beta OS=Homo sapiens GN=ETFB PE=1 SV=3	0	0	76	19	398	19	1	255	27.8	8.1	9190	307.72	19	7	0	1.85901e+09	1.66343e+09	1.86794e+09	2.1679e+09	2.4723e+09	2178461490	2.51291e+09	2.99175e+09	2.79672e+09
High	High	Master Protein	Q9H9Y6	DNA-directed RNA polymerase I subunit RPA2 OS=Homo sapiens GN=POLR1B PE=1 SV=2	0	0	37	37	348	37	1	1135	128.1	7.83	7088	307.69	37	15	0	1.89529e+08	1.86991e+08	1.96081e+08	2.19745e+08	2.18431e+08	2.27952e+08	2.69414e+08	2.67526e+08	2.74292e+08
High	High	Master Protein	Q14137	Ribosome biogenesis protein BOP1 OS=Homo sapiens GN=BOP1 PE=1 SV=2	0	0	49	31	265	31	1	746	83.6	6.19	5166	307.47	31	14	0	3.16557e+08	3.22231e+08	3.10258e+08	3.69103e+08	4.01037e+08	3.99677e+08	4.41036e+08	4.41868e+08	4.47997e+08
High	High	Master Protein	Q96T58	Msx2-interacting protein OS=Homo sapiens GN=SPEN PE=1 SV=1	0	0	21	55	290	55	1	3664	402	7.64	6398	307.42	53	23	0	6.35654e+07	6.04535e+07	6.19122e+07	7.83222e+07	8.20756e+07	7.67949e+07	7.61027e+07	7.66162e+07	7.62391e+07
High	High	Master Protein	P60510	Serine/threonine-protein phosphatase 4 catalytic subunit OS=Homo sapiens GN=PPP4C PE=1 SV=1	0	0	60	15	209	13	1	307	35.1	5.06	3786	307.13	15	10	0	8.53173e+07	8.12441e+07	8.74379e+07	1.48195e+08	1.48511e+08	1.37151e+08	1.43711e+08	1.59877e+08	1.36125e+08	Acetyl [N-Term]
High	High	Master Protein	O94905	Erlin-2 OS=Homo sapiens GN=ERLIN2 PE=1 SV=1	0	0	60	18	318	16	1	339	37.8	5.62	7398	306.87	18	10	2	5.11078e+08	4.84555e+08	4.82148e+08	5.3819e+08	5.58053e+08	5.56201e+08	6.77053e+08	7.11458e+08	7.36171e+08
High	High	Master Protein	Q9Y4P3	Transducin beta-like protein 2 OS=Homo sapiens GN=TBL2 PE=1 SV=1	0	0	59	23	285	23	1	447	49.8	9.44	6387	306.64	23	12	0	2.06227e+08	2.15025e+08	2.29591e+08	2.82762e+08	2.92628e+08	2.85727e+08	3.68078e+08	3.79496e+08	3.7071e+08
High	High	Master Protein	O43172	U4/U6 small nuclear ribonucleoprotein Prp4 OS=Homo sapiens GN=PRPF4 PE=1 SV=2	0	0	57	25	301	25	1	522	58.4	7.42	6504	306.4	25	17	0	3.02706e+08	3.06172e+08	3.10124e+08	3.90812e+08	4.01671e+08	4.03919e+08	3.69793e+08	3.92461e+08	3.98532e+08
High	High	Master Protein	Q12849	G-rich sequence factor 1 OS=Homo sapiens GN=GRSF1 PE=1 SV=3	0	0	62	22	278	22	1	480	53.1	6.19	6185	306.22	22	11	0	3.04502e+08	2.82151e+08	3.21592e+08	3.37559e+08	3.90609e+08	3.68421e+08	4.32056e+08	4.49194e+08	4.51033e+08
High	High	Master Protein Rejected	P35609	Alpha-actinin-2 OS=Homo sapiens GN=ACTN2 PE=1 SV=1	0	0	17	15	275	0	0	894	103.8	5.45	6125	305.84	15	10	0
High	High	Master Protein	Q7Z739	YTH domain-containing family protein 3 OS=Homo sapiens GN=YTHDF3 PE=1 SV=1	0	0	44	20	290	14	1	585	63.8	9.04	6339	305.79	20	10	3	2.20368e+08	2.29061e+08	2.19681e+08	2.94871e+08	3.01291e+08	3.06247e+08	2.79629e+08	3.14668e+08	3.10206e+08	Acetyl [N-Term]
High	High	Master Protein	P62244	40S ribosomal protein S15a OS=Homo sapiens GN=RPS15A PE=1 SV=2	0	0	62	10	311	10	1	130	14.8	10.13	7272	305.69	10	3	0	1.68964e+09	1.71165e+09	1.75392e+09	2.23978e+09	2.35764e+09	2.37007e+09	2.16043e+09	2.258e+09	2.34485e+09
High	High	Master Protein	Q9H2J4	Phosducin-like protein 3 OS=Homo sapiens GN=PDCL3 PE=1 SV=1	0	0	80	17	272	17	1	239	27.6	4.84	7568	305.08	16	10	0	1.70306e+08	1.54813e+08	1.69029e+08	1.78153e+08	2.03827e+08	1.93839e+08	2.2224e+08	2.37817e+08	2.441e+08	Acetyl [N-Term]
High	High	Master Protein	Q9BZV1	UBX domain-containing protein 6 OS=Homo sapiens GN=UBXN6 PE=1 SV=1	0	0	62	20	177	20	1	441	49.7	6.89	3640	304.92	20	14	0	8.40834e+07	87445401	8.76651e+07	1.41785e+08	1.5134e+08	1.32376e+08	1.6806e+08	1.72865e+08	1.58904e+08
High	High	Master Protein	P20020	Plasma membrane calcium-transporting ATPase 1 OS=Homo sapiens GN=ATP2B1 PE=1 SV=3	0	0	32	32	280	21	1	1258	138.7	6.04	7235	304.84	30	16	12	1.61715e+08	1.60515e+08	1.68092e+08	1.81374e+08	1.91352e+08	1.9705e+08	2.50885e+08	2.4632e+08	2.5076e+08	Acetyl [N-Term]
High	High	Master Protein	Q9P219	Protein Daple OS=Homo sapiens GN=CCDC88C PE=1 SV=3	0	0	38	59	318	57	1	2028	228.1	6.23	7440	304.83	58	20	0	9.01073e+07	8.81835e+07	8.98204e+07	1.10311e+08	1.09026e+08	1.10763e+08	1.13074e+08	1.22291e+08	1.18017e+08
High	High	Master Protein	Q99961	Endophilin-A2 OS=Homo sapiens GN=SH3GL1 PE=1 SV=1	0	0	46	16	262	16	1	368	41.5	5.43	5685	304.78	15	9	0	4.00643e+08	3.73002e+08	4.21523e+08	4.89579e+08	5.34676e+08	5.69006e+08	5.79809e+08	6.19451e+08	5.81069e+08
High	High	Master Protein	O43823	A-kinase anchor protein 8 OS=Homo sapiens GN=AKAP8 PE=1 SV=1	0	0	50	25	260	25	1	692	76.1	5.15	6585	304.77	25	12	0	9.56787e+07	1.0352e+08	9.59822e+07	1.0321e+08	1.07186e+08	1.10964e+08	1.32367e+08	1.40139e+08	1.46689e+08
High	High	Master Protein	Q9H7D7	WD repeat-containing protein 26 OS=Homo sapiens GN=WDR26 PE=1 SV=3	0	0	47	25	274	25	1	661	72.1	6.16	6584	304.74	24	13	0	1.64385e+08	1.64672e+08	1.67247e+08	2.09182e+08	2.45591e+08	2.51545e+08	2.63972e+08	2.77229e+08	2.4217e+08
High	High	Master Protein	P49720	Proteasome subunit beta type-3 OS=Homo sapiens GN=PSMB3 PE=1 SV=2	0	0	58	12	288	12	1	205	22.9	6.55	7199	304.7	12	7	0	4.02727e+08	4.35354e+08	4.44097e+08	4.33598e+08	4.60732e+08	4.77684e+08	4.51667e+08	5.0905e+08	4.57801e+08	Acetyl [N-Term]
High	High	Master Protein	O96008	Mitochondrial import receptor subunit TOM40 homolog OS=Homo sapiens GN=TOMM40 PE=1 SV=1	0	0	51	12	223	12	1	361	37.9	7.25	5164	304.23	12	7	0	1.4391e+08	1.40686e+08	1.47182e+08	1.57649e+08	1.66943e+08	1.55665e+08	2.23161e+08	2.33103e+08	2.45973e+08
High	High	Master Protein	Q68CP9	AT-rich interactive domain-containing protein 2 OS=Homo sapiens GN=ARID2 PE=1 SV=2	0	0	39	49	353	49	1	1835	197.3	7.42	7964	304.23	46	18	0	1.51851e+08	1.54158e+08	1.61861e+08	1.96189e+08	2.06127e+08	1.98337e+08	1.93237e+08	1.91562e+08	1.98101e+08
High	High	Master Protein	Q9H7Z7	Prostaglandin E synthase 2 OS=Homo sapiens GN=PTGES2 PE=1 SV=1	0	0	59	18	239	18	1	377	41.9	9.16	5660	303.77	17	9	0	1.80758e+08	1.87917e+08	2.00768e+08	2.43855e+08	2.52139e+08	2.49868e+08	257417142	2.51414e+08	2.60909e+08
High	High	Master Protein	Q96C86	m7GpppX diphosphatase OS=Homo sapiens GN=DCPS PE=1 SV=2	0	0	53	17	281	17	1	337	38.6	6.38	6907	303.69	17	8	0	2.88798e+08	3.19555e+08	3.16631e+08	4.29951e+08	4.68643e+08	4.40485e+08	4.74156e+08	4.94296e+08	4.90042e+08	Acetyl [N-Term]
High	High	Master Protein	Q8NI36	WD repeat-containing protein 36 OS=Homo sapiens GN=WDR36 PE=1 SV=1	0	0	45	37	352	37	1	951	105.3	7.53	8464	303.56	36	20	0	3.15509e+08	3.18849e+08	3.30163e+08	3.77053e+08	3.58191e+08	3.92044e+08	3.48856e+08	3.70651e+08	3.81595e+08
High	High	Master Protein	P35269	General transcription factor IIF subunit 1 OS=Homo sapiens GN=GTF2F1 PE=1 SV=2	0	0	44	26	334	26	1	517	58.2	7.49	8781	303.51	25	13	0	2.76101e+08	3.01321e+08	2.88592e+08	3.52626e+08	3.48822e+08	3.63788e+08	3.74477e+08	4.00981e+08	4.02799e+08	Acetyl [N-Term]
High	High	Master Protein	P61586	Transforming protein RhoA OS=Homo sapiens GN=RHOA PE=1 SV=1	0	0	81	15	308	7	1	193	21.8	6.1	8335	303.33	14	7	0	1.15456e+08	1.21021e+08	1.31057e+08	1.96e+08	1.95514e+08	1.86957e+08	2.25591e+08	2.10294e+08	2.08282e+08
High	High	Master Protein	P35249	Replication factor C subunit 4 OS=Homo sapiens GN=RFC4 PE=1 SV=2	0	0	62	20	256	20	1	363	39.7	8.02	6494	303.17	18	10	0	3.22089e+08	3.02529e+08	3.46245e+08	3.43908e+08	3.61949e+08	3.60928e+08	3.21381e+08	3.30759e+08	3.24046e+08
High	High	Master Protein	Q9NX55	Huntingtin-interacting protein K OS=Homo sapiens GN=HYPK PE=1 SV=2	0	0	54	9	240	9	1	129	14.7	4.93	5565	303.14	9	4	0	2.72568e+08	2.77614e+08	2.96981e+08	2.81274e+08	3.31642e+08	2.99837e+08	4.3561e+08	3.84992e+08	4.06761e+08
High	High	Master Protein	Q92769	Histone deacetylase 2 OS=Homo sapiens GN=HDAC2 PE=1 SV=2	0	0	46	22	367	17	1	488	55.3	5.91	7501	302.93	21	12	8	7.73102e+08	7.56195e+08	7.65806e+08	8.66696e+08	8.82031e+08	8.64502e+08	9.12126e+08	9.25873e+08	9.5195e+08	Acetyl [N-Term]
High	High	Master Protein	Q02487	Desmocollin-2 OS=Homo sapiens GN=DSC2 PE=1 SV=1	0	0	44	31	291	28	1	901	99.9	5.34	6593	302.85	31	14	3	1.82925e+08	2.08247e+08	2.31831e+08	2.18308e+08	2.33033e+08	2.59603e+08	3.51139e+08	3.44383e+08	3.62845e+08
High	High	Master Protein	Q96PZ0	Pseudouridylate synthase 7 homolog OS=Homo sapiens GN=PUS7 PE=1 SV=2	0	0	56	32	269	32	1	661	75	6.37	6131	302.62	32	18	0	1.75444e+08	1.67616e+08	1.8077e+08	1.95275e+08	2.12872e+08	2.19509e+08	1.55832e+08	1.65351e+08	1.63035e+08
High	High	Master Protein	Q10570	Cleavage and polyadenylation specificity factor subunit 1 OS=Homo sapiens GN=CPSF1 PE=1 SV=2	0	0	38	43	288	43	1	1443	160.8	6.4	7038	302.59	41	19	0	1.40788e+08	1.31164e+08	1.27554e+08	1.65276e+08	1.75604e+08	1.73073e+08	1.69319e+08	1.87057e+08	1.89383e+08
High	High	Master Protein	Q14165	Malectin OS=Homo sapiens GN=MLEC PE=1 SV=1	0	0	48	14	261	14	1	292	32.2	5.41	6819	302.38	14	8	0	2.58261e+08	2.41482e+08	2.64844e+08	2.47561e+08	2.562e+08	2.73022e+08	3.45423e+08	3.45329e+08	3.48001e+08
High	High	Master Protein	Q92925	SWI/SNF-related matrix-associated actin-dependent regulator of chromatin subfamily D member 2 OS=Homo sapiens GN=SMARCD2 PE=1 SV=3	0	0	53	26	231	22	1	531	58.9	9.64	5211	302.35	26	15	5	1.59086e+08	1.67074e+08	1.62111e+08	2.0014e+08	2.14536e+08	2.15788e+08	1.93832e+08	2.18416e+08	2.31075e+08
High	High	Master Protein	Q15121	Astrocytic phosphoprotein PEA-15 OS=Homo sapiens GN=PEA15 PE=1 SV=2	0	0	58	7	221	7	1	130	15	5.02	6104	302.26	7	5	0	2.77718e+08	2.69082e+08	306061716	3.62445e+08	3.35597e+08	368185973	4.00702e+08	3.94587e+08	3.85858e+08
High	High	Master Protein	O75832	26S proteasome non-ATPase regulatory subunit 10 OS=Homo sapiens GN=PSMD10 PE=1 SV=1	0	0	59	11	229	11	1	226	24.4	6.1	4744	302.23	11	9	0	3.49343e+08	3.32303e+08	3.39709e+08	4.26244e+08	4.18713e+08	3.95144e+08	4.51184e+08	4.92785e+08	4.36734e+08	Acetyl [N-Term]
High	High	Master Protein	Q9GZZ1	N-alpha-acetyltransferase 50 OS=Homo sapiens GN=NAA50 PE=1 SV=1	0	0	70	15	259	15	1	169	19.4	8.81	5235	302.16	15	9	0	3.07976e+08	3.04653e+08	2.89444e+08	3.30298e+08	3.52962e+08	3.34433e+08	4.38834e+08	3.95406e+08	3.61275e+08
High	High	Master Protein	Q86TU7	Histone-lysine N-methyltransferase setd3 OS=Homo sapiens GN=SETD3 PE=1 SV=1	0	0	60	32	371	32	1	594	67.2	5.96	9227	301.98	32	12	0	2.36694e+08	2.51419e+08	2.62572e+08	3.21458e+08	3.62669e+08	3.48074e+08	3.26933e+08	3.34015e+08	3.32046e+08
High	High	Master Protein	O00754	Lysosomal alpha-mannosidase OS=Homo sapiens GN=MAN2B1 PE=1 SV=3	0	0	33	28	277	28	1	1011	113.7	7.28	6061	301.84	28	14	0	3.12665e+08	3.31978e+08	3.18636e+08	3.85286e+08	3.67219e+08	4.18528e+08	4.18897e+08	407655370	4.17451e+08
High	High	Master Protein	Q9Y5K6	CD2-associated protein OS=Homo sapiens GN=CD2AP PE=1 SV=1	0	0	77	49	507	49	1	639	71.4	6.4	12142	301.74	48	18	0	7.72885e+08	7.23332e+08	7.34666e+08	9.33097e+08	9.36565e+08	9.33186e+08	1.08336e+09	1.07579e+09	1.0881e+09	Acetyl [N-Term]
High	High	Master Protein	Q5JSH3	WD repeat-containing protein 44 OS=Homo sapiens GN=WDR44 PE=1 SV=1	0	0	55	40	338	40	1	913	101.3	5.45	7771	301.73	39	23	0	1.86282e+08	1.89525e+08	1.93676e+08	2.50229e+08	2.49174e+08	2.57733e+08	2.64335e+08	2.79038e+08	2.86491e+08
High	High	Master Protein	Q6IA86	Elongator complex protein 2 OS=Homo sapiens GN=ELP2 PE=1 SV=2	0	0	47	28	274	28	1	826	92.4	5.96	5986	301.39	28	12	0	1.87333e+08	1.75854e+08	1.83883e+08	1.96851e+08	2.17005e+08	2.06279e+08	2.28864e+08	2.33537e+08	2.28502e+08	Acetyl [N-Term]
High	High	Master Protein	P52306	Rap1 GTPase-GDP dissociation stimulator 1 OS=Homo sapiens GN=RAP1GDS1 PE=1 SV=3	0	0	47	24	277	24	1	607	66.3	5.31	6392	301.22	23	14	0	2.0847e+08	1.92394e+08	2.07227e+08	2.23773e+08	2.42919e+08	2.33229e+08	2.54136e+08	2.56061e+08	2.69181e+08	Acetyl [N-Term]
High	High	Master Protein	O43237	Cytoplasmic dynein 1 light intermediate chain 2 OS=Homo sapiens GN=DYNC1LI2 PE=1 SV=1	0	0	59	24	305	22	1	492	54.1	6.38	8062	300.19	23	12	0	2.54843e+08	2.60354e+08	2.6372e+08	2.99728e+08	3.22078e+08	3.22211e+08	3.72332e+08	3.71609e+08	3.74584e+08
High	High	Master Protein	O15160	DNA-directed RNA polymerases I and III subunit RPAC1 OS=Homo sapiens GN=POLR1C PE=1 SV=1	0	0	56	14	231	14	1	346	39.2	5.5	6430	300.17	14	8	0	2.81212e+08	2.72217e+08	2.8319e+08	3.37435e+08	3.51496e+08	345359699	3.68834e+08	3.79204e+08	4.00092e+08	Acetyl [N-Term]
High	High	Master Protein	Q99598	Translin-associated protein X OS=Homo sapiens GN=TSNAX PE=1 SV=1	0	0	69	17	254	17	1	290	33.1	6.55	5142	300.07	17	10	0	2.35312e+08	2.35052e+08	2.33492e+08	2.73518e+08	2.8333e+08	2.83128e+08	3.2303e+08	3.32499e+08	3.409e+08
High	High	Master Protein	Q9H9E3	Conserved oligomeric Golgi complex subunit 4 OS=Homo sapiens GN=COG4 PE=1 SV=3	0	0	49	33	328	33	1	785	89	5.19	7249	299.94	32	18	0	2.30333e+08	2.28332e+08	2.46468e+08	2.88762e+08	3.13934e+08	2.99207e+08	3.06371e+08	3.23053e+08	3.20489e+08
High	High	Master Protein	Q9NQW7	Xaa-Pro aminopeptidase 1 OS=Homo sapiens GN=XPNPEP1 PE=1 SV=3	0	0	67	30	335	29	1	623	69.9	5.67	6907	299.83	30	13	1	5.91884e+08	6.31227e+08	7.09634e+08	7.59027e+08	8.66971e+08	7.93966e+08	8.59739e+08	8.6337e+08	8.59815e+08
High	High	Master Protein	Q658Y4	Protein FAM91A1 OS=Homo sapiens GN=FAM91A1 PE=1 SV=3	0	0	34	23	255	23	1	838	93.9	6.39	5536	299.77	23	15	0	1.42876e+08	1.34172e+08	1.3959e+08	1.69547e+08	1.85167e+08	1.84922e+08	1.58778e+08	1.62241e+08	1.61489e+08
High	High	Master Protein	P54819	Adenylate kinase 2, mitochondrial OS=Homo sapiens GN=AK2 PE=1 SV=2	0	0	77	20	385	20	1	239	26.5	7.81	9347	299.7	19	9	0	8.30974e+08	8.37962e+08	8.68404e+08	9.88694e+08	1.10556e+09	1.12063e+09	1.19759e+09	1.23733e+09	1.19988e+09
High	High	Master Protein	Q9H444	Charged multivesicular body protein 4b OS=Homo sapiens GN=CHMP4B PE=1 SV=1	0	0	66	17	279	16	1	224	24.9	4.82	5679	299.24	17	9	1	4.672e+08	4.4024e+08	5.18646e+08	6.09135e+08	6.68874e+08	6.36077e+08	6.48186e+08	6.67257e+08	6.68674e+08
High	High	Master Protein	P45973	Chromobox protein homolog 5 OS=Homo sapiens GN=CBX5 PE=1 SV=1	0	0	58	13	281	12	1	191	22.2	5.86	6468	299.08	13	8	1	4.69311e+08	4.76051e+08	4.68394e+08	6.27224e+08	6.57954e+08	6.87956e+08	6.91904e+08	7.49221e+08	7.24203e+08
High	High	Master Protein	O00763	Acetyl-CoA carboxylase 2 OS=Homo sapiens GN=ACACB PE=1 SV=3	0	0	6	16	245	1	1	2458	276.4	6.49	5721	298.8	16	7	0	234714	217990	269347	430454	453195	361576	374041	448524	381442
High	High	Master Protein	Q9BRK5	45 kDa calcium-binding protein OS=Homo sapiens GN=SDF4 PE=1 SV=1	0	0	53	17	295	17	1	362	41.8	4.86	6180	298.79	17	7	0	3.81458e+08	3.68737e+08	3.56165e+08	4.35687e+08	4.68739e+08	5.06326e+08	4.75452e+08	6.18083e+08	5.59068e+08
High	High	Master Protein	Q9NY27	Serine/threonine-protein phosphatase 4 regulatory subunit 2 OS=Homo sapiens GN=PPP4R2 PE=1 SV=3	0	0	70	20	263	20	1	417	46.9	4.54	6015	298.63	20	14	0	1.25237e+08	1.22448e+08	1.33214e+08	1.50227e+08	1.55107e+08	1.63389e+08	1.82153e+08	1.83744e+08	1.69979e+08
High	High	Master Protein	Q9Y450	HBS1-like protein OS=Homo sapiens GN=HBS1L PE=1 SV=1	0	0	63	36	341	36	1	684	75.4	6.61	7803	298.56	35	16	0	2.67085e+08	2.62812e+08	2.61778e+08	3.22096e+08	3.25614e+08	3.19471e+08	3.26448e+08	3.49341e+08	3.455e+08
High	High	Master Protein	Q96GA7	Serine dehydratase-like OS=Homo sapiens GN=SDSL PE=1 SV=1	0	0	54	13	211	13	1	329	34.7	6.89	5698	298.41	12	8	0	1.23783e+08	1.18346e+08	1.23117e+08	1.47436e+08	1.51412e+08	1.62254e+08	1.86806e+08	1.85186e+08	1.93817e+08	Acetyl [N-Term]
High	High	Master Protein	Q5TFE4	5'-nucleotidase domain-containing protein 1 OS=Homo sapiens GN=NT5DC1 PE=1 SV=1	0	0	65	27	354	27	1	455	51.8	6.35	8057	298.17	27	14	0	5.44522e+08	5.29698e+08	5.2778e+08	7.0615e+08	7.04413e+08	7.13585e+08	6.9273e+08	7.49561e+08	7.07118e+08	Acetyl [N-Term]
High	High	Master Protein	Q15637	Splicing factor 1 OS=Homo sapiens GN=SF1 PE=1 SV=4	0	0	41	20	323	19	1	639	68.3	8.98	7214	297.95	20	11	1	8.37807e+08	8.1187e+08	8.64698e+08	1.17546e+09	1.21689e+09	1.1622e+09	1.08654e+09	1.14103e+09	1.08723e+09	Acetyl [N-Term]
High	High	Master Protein	P23284	Peptidyl-prolyl cis-trans isomerase B OS=Homo sapiens GN=PPIB PE=1 SV=2	0	0	55	15	465	15	1	216	23.7	9.41	11213	297.77	15	7	0	4.39691e+09	4.34851e+09	5.33865e+09	5.01892e+09	5.14027e+09	5.11061e+09	5.32039e+09	5.44791e+09	5.22645e+09
High	High	Master Protein	Q15386	Ubiquitin-protein ligase E3C OS=Homo sapiens GN=UBE3C PE=1 SV=3	0	0	44	41	322	41	1	1083	123.8	6.71	7511	297.36	39	20	0	2.0774e+08	2.11962e+08	2.22379e+08	2.54399e+08	2.61509e+08	2.55e+08	2.78988e+08	2.77325e+08	2.73644e+08
High	High	Master Protein	Q9NR31	GTP-binding protein SAR1a OS=Homo sapiens GN=SAR1A PE=1 SV=1	0	0	68	12	220	9	1	198	22.4	6.68	3892	297.29	12	8	4	3.67583e+08	3.46082e+08	3.72736e+08	4.36479e+08	4.78873e+08	4.73804e+08	5.21107e+08	4.43696e+08	4.73747e+08
High	High	Master Protein	Q08257	Quinone oxidoreductase OS=Homo sapiens GN=CRYZ PE=1 SV=1	0	0	71	19	229	19	1	329	35.2	8.44	5162	297.13	19	10	0	1.84964e+08	1.69459e+08	1.61665e+08	2.1482e+08	2.21499e+08	2.15847e+08	2.81456e+08	2.6295e+08	2.64011e+08
High	High	Master Protein	Q7Z3J2	UPF0505 protein C16orf62 OS=Homo sapiens GN=C16orf62 PE=1 SV=2	0	0	39	33	268	33	1	963	109.5	7.21	5680	297.04	32	15	0	1.05859e+08	1.03105e+08	1.15482e+08	1.28829e+08	1.38399e+08	1.36633e+08	1.28379e+08	1.38119e+08	1.3519e+08	Acetyl [N-Term]
High	High	Master Protein	Q9Y6G9	Cytoplasmic dynein 1 light intermediate chain 1 OS=Homo sapiens GN=DYNC1LI1 PE=1 SV=3	0	0	73	36	349	34	1	523	56.5	6.42	7516	296.85	36	15	1	4.30171e+08	4.03402e+08	4.23056e+08	5.05559e+08	5.35233e+08	5.0827e+08	6.06856e+08	5.96222e+08	5.91205e+08
High	High	Master Protein	Q96DI7	U5 small nuclear ribonucleoprotein 40 kDa protein OS=Homo sapiens GN=SNRNP40 PE=1 SV=1	0	0	61	18	256	18	1	357	39.3	8.1	6206	296.63	18	9	0	3.62152e+08	3.3959e+08	3.62511e+08	4.1146e+08	4.56938e+08	4.52644e+08	4.66209e+08	4.52721e+08	4.86314e+08
High	High	Master Protein	Q15942	Zyxin OS=Homo sapiens GN=ZYX PE=1 SV=1	0	0	57	20	261	20	1	572	61.2	6.67	5691	296.62	20	9	0	1.26007e+08	107057555	1.16366e+08	1.62931e+08	1.84438e+08	1.78025e+08	1.90328e+08	2.03272e+08	2.00485e+08	Acetyl [N-Term]
High	High	Master Protein	Q9UPT8	Zinc finger CCCH domain-containing protein 4 OS=Homo sapiens GN=ZC3H4 PE=1 SV=3	0	0	35	29	332	29	1	1303	140.2	6.27	8683	296.59	29	12	0	1.17643e+08	1.10763e+08	1.14363e+08	1.31598e+08	1.42159e+08	1.4471e+08	1.53034e+08	1.58916e+08	1.42928e+08
High	High	Master Protein	Q86WU2	Probable D-lactate dehydrogenase, mitochondrial OS=Homo sapiens GN=LDHD PE=1 SV=1	0	0	75	21	227	21	1	507	54.8	6.65	4969	296.51	21	14	0	1.02765e+08	1.00339e+08	1.06155e+08	1.3961e+08	1.468e+08	1.42777e+08	1.91927e+08	2.09686e+08	1.86995e+08
High	High	Master Protein	Q06124	Tyrosine-protein phosphatase non-receptor type 11 OS=Homo sapiens GN=PTPN11 PE=1 SV=2	0	0	75	39	410	39	1	597	68.4	7.3	9745	296.38	39	15	0	4.6055e+08	4.62577e+08	5.25071e+08	5.66078e+08	6.19931e+08	6.2982e+08	6.53988e+08	6.92893e+08	6.9858e+08
High	High	Master Protein	P23229	Integrin alpha-6 OS=Homo sapiens GN=ITGA6 PE=1 SV=5	0	0	39	35	281	35	1	1130	126.5	6.61	6805	296.35	34	15	0	1.08985e+08	1.03257e+08	1.02249e+08	1.15562e+08	1.32321e+08	1.29231e+08	1.58735e+08	1.64259e+08	1.77868e+08
High	High	Master Protein	P42285	Superkiller viralicidic activity 2-like 2 OS=Homo sapiens GN=SKIV2L2 PE=1 SV=3	0	0	45	45	421	45	1	1042	117.7	6.52	9244	296.34	43	18	0	4.54699e+08	4.58445e+08	4.71967e+08	5.43147e+08	5.61342e+08	5.55195e+08	6.30416e+08	6.34845e+08	6.44786e+08
High	High	Master Protein	Q9BXW7	Cat eye syndrome critical region protein 5 OS=Homo sapiens GN=CECR5 PE=1 SV=1	0	0	48	16	201	16	1	423	46.3	8.13	5338	296.07	16	10	0	1.81218e+08	1.85913e+08	1.89529e+08	2.36969e+08	2.18927e+08	2.31456e+08	2.75283e+08	2.85961e+08	2.74957e+08
High	High	Master Protein	O76021	Ribosomal L1 domain-containing protein 1 OS=Homo sapiens GN=RSL1D1 PE=1 SV=3	0	0	54	29	381	29	1	490	54.9	10.13	9619	296.04	28	11	0	5.62996e+08	5.39046e+08	5.80701e+08	7.39398e+08	8.85699e+08	8.07121e+08	8.81708e+08	9.64874e+08	9.5796e+08	Acetyl [N-Term]
High	High	Master Protein	Q8WVV9	Heterogeneous nuclear ribonucleoprotein L-like OS=Homo sapiens GN=HNRNPLL PE=1 SV=1	0	0	65	28	334	27	1	542	60	7.72	7555	295.71	28	15	1	4.00289e+08	3.79814e+08	4.31189e+08	4.80237e+08	5.43549e+08	5.23074e+08	4.8135e+08	4.90055e+08	5.01731e+08
High	High	Master Protein	Q8TDI0	Chromodomain-helicase-DNA-binding protein 5 OS=Homo sapiens GN=CHD5 PE=1 SV=1	0	0	17	33	348	4	1	1954	222.9	6.15	7365	295.63	32	14	0	9.81523e+06	1.16788e+07	1.27378e+07	1.29173e+07	1.5471e+07	1.40708e+07	2.02782e+07	19382194	1.52107e+07
High	High	Master Protein	Q6UXN9	WD repeat-containing protein 82 OS=Homo sapiens GN=WDR82 PE=1 SV=1	0	0	61	17	210	17	1	313	35.1	7.69	4069	295.43	17	10	0	2.61863e+08	2.70063e+08	2.84301e+08	3.43599e+08	3.94481e+08	3.48611e+08	3.02132e+08	321355042	3.60061e+08
High	High	Master Protein	P33240	Cleavage stimulation factor subunit 2 OS=Homo sapiens GN=CSTF2 PE=1 SV=1	0	0	48	17	233	9	1	577	60.9	6.83	5264	295.25	17	10	0	1.46105e+08	1.44549e+08	163142901	2.00356e+08	2.04921e+08	2.14166e+08	2.39696e+08	2.3295e+08	2.48747e+08	Acetyl [N-Term]
High	High	Master Protein	P30405	Peptidyl-prolyl cis-trans isomerase F, mitochondrial OS=Homo sapiens GN=PPIF PE=1 SV=1	0	0	61	10	212	9	1	207	22	9.38	4464	294.25	10	4	0	3.90874e+08	3.62488e+08	3.69898e+08	5.01439e+08	5.12804e+08	4.77489e+08	6.11752e+08	5.83402e+08	6.30442e+08
High	High	Master Protein	Q14651	Plastin-1 OS=Homo sapiens GN=PLS1 PE=1 SV=2	0	0	41	21	241	15	1	629	70.2	5.41	5276	294.09	21	12	0	4.28619e+07	4.24029e+07	4.58729e+07	5.19741e+07	5.47186e+07	5.70292e+07	66478252	7.09289e+07	6.93081e+07	Acetyl [N-Term]
High	High	Master Protein	Q9P1Y5	Calmodulin-regulated spectrin-associated protein 3 OS=Homo sapiens GN=CAMSAP3 PE=1 SV=2	0	0	52	41	293	40	1	1249	134.7	8.35	6645	293.67	41	20	1	1.09893e+08	9.76883e+07	1.21796e+08	1.36779e+08	1.48996e+08	1.40702e+08	1.43835e+08	1.48709e+08	1.51103e+08	Acetyl [N-Term]
High	High	Master Protein	P62987	Ubiquitin-60S ribosomal protein L40 OS=Homo sapiens GN=UBA52 PE=1 SV=2	0	0	46	6	843	1	1	128	14.7	9.83	20558	293.51	6	4	0	1.77262e+07	1.61664e+07	3.27138e+07	2.64848e+07	6.18627e+07	2.65179e+07	2.37739e+07	1.7592e+07	2.12163e+07
High	High	Master Protein	Q13596	Sorting nexin-1 OS=Homo sapiens GN=SNX1 PE=1 SV=3	0	0	45	22	370	20	1	522	59	5.15	11217	293.46	22	15	0	4.2354e+08	4.37882e+08	4.41323e+08	5.6627e+08	5.92433e+08	5.66553e+08	5.80244e+08	5.96456e+08	6.00408e+08	Acetyl [N-Term]
High	High	Master Protein	Q9NVE7	Pantothenate kinase 4 OS=Homo sapiens GN=PANK4 PE=1 SV=1	0	0	50	29	281	29	1	773	85.9	6.28	7075	293.43	29	14	0	1.23231e+08	1.20855e+08	1.24829e+08	1.46851e+08	1.57381e+08	1.56059e+08	1.66019e+08	1.76406e+08	1.67841e+08	Acetyl [N-Term]
High	High	Master Protein	Q9Y5A9	YTH domain-containing family protein 2 OS=Homo sapiens GN=YTHDF2 PE=1 SV=2	0	0	42	21	319	17	1	579	62.3	8.79	7591	292.58	21	10	5	6.02286e+08	5.62324e+08	5.8717e+08	7.58844e+08	7.84332e+08	7.92037e+08	8.71279e+08	7.88508e+08	8.24456e+08	Acetyl [N-Term]
High	High	Master Protein	O14929	Histone acetyltransferase type B catalytic subunit OS=Homo sapiens GN=HAT1 PE=1 SV=1	0	0	54	16	308	16	1	419	49.5	5.69	7721	292.57	16	6	0	4.74896e+08	4.672e+08	4.71556e+08	5.40736e+08	5.85075e+08	5.44662e+08	5.55773e+08	5.8832e+08	5.80955e+08	Acetyl [N-Term]
High	High	Master Protein	Q13111	Chromatin assembly factor 1 subunit A OS=Homo sapiens GN=CHAF1A PE=1 SV=2	0	0	52	36	284	36	1	956	106.9	5.94	6692	292.43	34	20	0	9.38484e+07	9.36732e+07	9.76086e+07	1.10343e+08	1.03856e+08	1.09488e+08	1.00678e+08	9.93535e+07	1.06799e+08	Acetyl [N-Term]
High	High	Master Protein	Q13438	Protein OS-9 OS=Homo sapiens GN=OS9 PE=1 SV=1	0	0	46	21	170	21	1	667	75.5	4.87	2803	292.33	21	11	0	7.72545e+07	6.98662e+07	7.3434e+07	6.76829e+07	7.97656e+07	6.97995e+07	1.09555e+08	1.30866e+08	1.2434e+08
High	High	Master Protein	Q9Y3P9	Rab GTPase-activating protein 1 OS=Homo sapiens GN=RABGAP1 PE=1 SV=3	0	0	54	48	407	46	1	1069	121.7	5.25	9720	292.33	48	17	2	2.0896e+08	1.88772e+08	2.1545e+08	2.62521e+08	2.94791e+08	2.84259e+08	3.61837e+08	3.71441e+08	3.57095e+08
High	High	Master Protein	Q9BSJ2	Gamma-tubulin complex component 2 OS=Homo sapiens GN=TUBGCP2 PE=1 SV=2	0	0	49	37	295	37	1	902	102.5	6.84	6009	292.31	37	17	0	1.40219e+08	1.35078e+08	1.43602e+08	1.62196e+08	1.79793e+08	1.69041e+08	1.83124e+08	1.95339e+08	1.83093e+08
High	High	Master Protein	Q9UHB7	AF4/FMR2 family member 4 OS=Homo sapiens GN=AFF4 PE=1 SV=1	0	0	31	31	270	31	1	1163	127.4	9.31	7658	292.2	30	13	0	6.94278e+07	6.0514e+07	6.72962e+07	9.24527e+07	9.9504e+07	9.16215e+07	7.13076e+07	7.3724e+07	7.54295e+07
High	High	Master Protein	P46108	Adapter molecule crk OS=Homo sapiens GN=CRK PE=1 SV=2	0	0	70	19	249	19	1	304	33.8	5.55	4603	291.94	19	10	0	3.51846e+08	3.50031e+08	3.285e+08	4.33981e+08	4.19589e+08	4.21635e+08	4.78594e+08	4.77693e+08	5.34381e+08	Acetyl [N-Term]
High	High	Master Protein	Q96EK5	KIF1-binding protein OS=Homo sapiens GN=KIF1BP PE=1 SV=1	0	0	50	24	276	24	1	621	71.8	5.49	5317	291.93	24	9	0	2.83783e+08	2.70048e+08	2.83442e+08	3.32554e+08	3.4409e+08	3.53549e+08	3.58954e+08	3.50545e+08	361317671
High	High	Master Protein	P49257	Protein ERGIC-53 OS=Homo sapiens GN=LMAN1 PE=1 SV=2	0	0	45	19	286	19	1	510	57.5	6.77	5528	291.75	19	11	0	6.19888e+08	5.74026e+08	6.22242e+08	7.57006e+08	7.72367e+08	7.4612e+08	7.40645e+08	8.38498e+08	8.35003e+08
High	High	Master Protein	O60907	F-box-like/WD repeat-containing protein TBL1X OS=Homo sapiens GN=TBL1X PE=1 SV=3	0	0	47	19	184	9	1	577	62.5	6.55	4513	291.75	19	10	10	9.07948e+07	8.16324e+07	8.59179e+07	8.74649e+07	1.04203e+08	9.48897e+07	1.19299e+08	1.17353e+08	1.24776e+08
High	High	Master Protein	Q9NSK0	Kinesin light chain 4 OS=Homo sapiens GN=KLC4 PE=1 SV=3	0	0	51	29	243	20	1	619	68.6	6.18	5627	291.71	29	9	2	5.8889e+07	59634803	6.10626e+07	7.9844e+07	8.06239e+07	9.13305e+07	8.87065e+07	9.95188e+07	9.68427e+07	Acetyl [N-Term]
High	High	Master Protein	P33121	Long-chain-fatty-acid--CoA ligase 1 OS=Homo sapiens GN=ACSL1 PE=1 SV=1	0	0	57	35	458	34	1	698	77.9	7.15	10637	291.28	35	14	1	8.34884e+08	8.4212e+08	8.76819e+08	1.01485e+09	1.02027e+09	1.03256e+09	1.19041e+09	1202072978	1.27741e+09	Acetyl [N-Term]
High	High	Master Protein	O15394	Neural cell adhesion molecule 2 OS=Homo sapiens GN=NCAM2 PE=1 SV=2	0	0	39	29	291	29	1	837	93	5.6	6571	291.21	28	15	0	2.33404e+08	2.23666e+08	2.42395e+08	2.95756e+08	3.01275e+08	3.08276e+08	3.26833e+08	3.44161e+08	3.60023e+08
High	High	Master Protein	Q00169	Phosphatidylinositol transfer protein alpha isoform OS=Homo sapiens GN=PITPNA PE=1 SV=2	0	0	68	21	320	15	1	270	31.8	6.55	6353	291.18	21	5	0	5.99385e+08	5.55203e+08	5.73157e+08	7.04331e+08	7.12254e+08	7.50208e+08	7.28949e+08	8.05047e+08	8.22654e+08
High	High	Master Protein	O75475	PC4 and SFRS1-interacting protein OS=Homo sapiens GN=PSIP1 PE=1 SV=1	0	0	53	33	306	32	1	530	60.1	9.13	6467	290.69	32	13	1	3.17229e+08	3.07066e+08	3.31538e+08	3.33058e+08	3.59181e+08	3.41338e+08	3.29628e+08	3.26253e+08	3.58787e+08
High	High	Master Protein	P52888	Thimet oligopeptidase OS=Homo sapiens GN=THOP1 PE=1 SV=2	0	0	48	35	364	35	1	689	78.8	6.05	7935	290.28	35	12	0	5.61312e+08	5.63748e+08	5.68769e+08	6.43453e+08	6.59014e+08	6.61803e+08	7.21654e+08	6.9876e+08	6.91412e+08
High	High	Master Protein Candidate	P0CG48	Polyubiquitin-C OS=Homo sapiens GN=UBC PE=1 SV=3	0	0	74	6	822	1	1	685	77	7.66	19960	290.27	6	3	0
High	High	Master Protein	P0CG47	Polyubiquitin-B OS=Homo sapiens GN=UBB PE=1 SV=1	0	0	71	6	822	1	1	229	25.7	7.43	19960	290.27	6	3	0
[truncated: 9,920 more rows]

## Sheet: Filtered
Protein FDR Confidence: Mascot	Protein FDR Confidence: Sequest HT	Master	Accession	Description	Exp. q-value: Mascot	Exp. q-value: Sequest HT	Coverage [%]	# Peptides	# PSMs	# Unique Peptides	# Protein Groups	# AAs	MW [kDa]	calc. pI	Score Mascot: Mascot	Score Sequest HT: Sequest HT	# Peptides (by Search Engine): Mascot	# Peptides (by Search Engine): Sequest HT	# Razor Peptides	Abundances (Grouped): NT 1	Abundances (Grouped): NT 2	Abundances (Grouped): NT 3	Abundances (Grouped): 24h Ctrl 1	Abundances (Grouped): 24h Ctrl 2	Abundances (Grouped): 24h Ctrl 3	Abundances (Grouped): 24h KD 1	Abundances (Grouped): 24h KD 2	Abundances (Grouped): 24h KD 3	Modifications
[truncated: 7,018 more rows]

[truncated: 1 more sheets: Normalized]
