# Supplementary material for: The Potential Tumor-Suppressor DHRS7 Inversely Correlates with EGFR Expression in Prostate Cancer Cells and Tumor Samples
Source: Cancers (Basel). 2022 Jun 23;14(13):3074. doi: 10.3390/cancers14133074 (PMC9264982; doi:10.3390/cancers14133074)
Supplement: Supplementary file 1 [file cancers-14-03074-s001.zip › DHRS7_Supplementary_File2.xlsx]

## Sheet: Information
Information:
This file lists the proteins of the proteomics experiment of the 36 h time points.
Sheets:	Original Export:	The complete list originally exported from Proteome Discoverer 2.2.
	Filtered:	The list of proteins filtered as described under the Materials and Methods section.
	Normalized:	List of proteins (filtered) and median normalized by calculating the fold change of the technical replicates (repeated injection/measurement by mass-spectrometry) of Ctrl and KD
		over their respective technical replicate of the NT control (Non-Treated; LNCaP sample not subjected to any treatment), followed by calculating the log2-value and subtracting the median of the proteome signal of the technical replicate.
Headers:	NT	Non-Treated LNCap sample not subjected to any treatment
	Ctrl	siRNA-control sample
	KD	Knock-down of DHRS7
	FC 36h Ctrl/KD 1 over NT 1	Fold change of the abundance of the Ctrl (or KD) sample over the NT sample of the respective technical replicate
	Log2 FC 36h Ctrl/KD 1 over NT 1	Log2 value of the calculated fold change of Ctrl (or KD) over the NT sample of the respective technical replicate
	36h Ctrl/KD 1 (Median Norm)	Median normalized fold change of the calculated fold chage of Ctrl (or KD) over the NT sample of the respective technical replicate (as a Log2-value)

## Sheet: Original Export
Protein FDR Confidence: Mascot	Protein FDR Confidence: Sequest HT	Master	Accession	Description	Exp. q-value: Mascot	Exp. q-value: Sequest HT	Coverage [%]	# Peptides	# PSMs	# Unique Peptides	# Protein Groups	# AAs	MW [kDa]	calc. pI	Score Mascot: Mascot	Score Sequest HT: Sequest HT	# Peptides (by Search Engine): Mascot	# Peptides (by Search Engine): Sequest HT	# Razor Peptides	Abundances (Grouped): NT 1	Abundances (Grouped): NT 2	Abundances (Grouped): NT 3	Abundances (Grouped): 36h Ctrl 1	Abundances (Grouped): 36h Ctrl 2	Abundances (Grouped): 36h Ctrl 3	Abundances (Grouped): 36h KD 1	Abundances (Grouped): 36h KD 2	Abundances (Grouped): 36h KD 3	Modifications
High	High	Master Protein	P04406	Glyceraldehyde-3-phosphate dehydrogenase OS=Homo sapiens GN=GAPDH PE=1 SV=3	0	0	80	21	7893	20	1	335	36	8.46	159391	15733.8	20	16	1	3.35622e+10	3.39473e+10	3.07698e+10	4.9908e+10	4.98961e+10	4.71459e+10	4.3784e+10	4.14709e+10	3.72063e+10
High	High	Master Protein	P68104	Elongation factor 1-alpha 1 OS=Homo sapiens GN=EEF1A1 PE=1 SV=1	0	0	73	30	8710	19	1	462	50.1	9.01	177748	13993	30	19	0	1.95923e+10	2.12659e+10	2.19337e+10	2.25687e+10	2.62528e+10	2.75588e+10	2.51383e+10	2.68553e+10	2.3378e+10
High	High	None	Q5VTE0	Putative elongation factor 1-alpha-like 3 OS=Homo sapiens GN=EEF1A1P5 PE=5 SV=1	0	0	59	28	8436	18	1	462	50.2	9.07	172479	13568.6	28	17	0	1.84986e+10	2.04375e+10	2.07975e+10	2.12035e+10	2.5185e+10	2.61713e+10	2.33497e+10	2.52268e+10	2.20616e+10
High	High	Master Protein	Q05639	Elongation factor 1-alpha 2 OS=Homo sapiens GN=EEF1A2 PE=1 SV=1	0	0	75	32	7546	21	1	463	50.4	9.03	150504	12298.9	31	20	13	3.60491e+10	4.16149e+10	3.38183e+10	4.51596e+10	4.40878e+10	4.29827e+10	4.74525e+10	4.11857e+10	4.14975e+10
High	High	Master Protein	P06733	Alpha-enolase OS=Homo sapiens GN=ENO1 PE=1 SV=2	0	0	75	28	6928	23	1	434	47.1	7.39	162685	11058.6	27	19	5	2.41067e+10	2.63545e+10	2.54096e+10	3.38177e+10	3.39068e+10	3.45141e+10	2.63472e+10	2.75045e+10	2.75971e+10
High	High	Master Protein	P63261	Actin, cytoplasmic 2 OS=Homo sapiens GN=ACTG1 PE=1 SV=1	0	0	81	28	6239	2	1	375	41.8	5.48	150561	9195.84	27	15	0	9.3265e+08	1.03784e+09	1.01724e+09	1.02115e+09	1.21429e+09	1.23882e+09	1.27077e+09	1.19027e+09	1.12942e+09	Acetyl [N-Term; N-Term]
High	High	Master Protein	P60709	Actin, cytoplasmic 1 OS=Homo sapiens GN=ACTB PE=1 SV=1	0	0	81	28	6182	2	1	375	41.7	5.48	148487	9191.92	27	15	37	4.72564e+10	5.00113e+10	4.71454e+10	5.90485e+10	5.65083e+10	6.64907e+10	5.66484e+10	6.04374e+10	5.56796e+10	Acetyl [N-Term; N-Term]
High	High	Master Protein	P10809	60 kDa heat shock protein, mitochondrial OS=Homo sapiens GN=HSPD1 PE=1 SV=2	0	0	76	45	6163	45	1	573	61	5.87	143413	9079.45	45	37	0	1.65532e+10	1.65393e+10	1.62073e+10	2.06993e+10	2.13781e+10	2.097e+10	1.95098e+10	1.99145e+10	1.90221e+10
High	High	Master Protein Rejected	P68363	Tubulin alpha-1B chain OS=Homo sapiens GN=TUBA1B PE=1 SV=1	0	0	81	31	5974	0	0	451	50.1	5.06	129257	8921.05	31	22	0
High	High	Master Protein	Q71U36	Tubulin alpha-1A chain OS=Homo sapiens GN=TUBA1A PE=1 SV=1	0	0	81	31	5346	2	1	451	50.1	5.06	110565	8580.41	31	22	4	2.19978e+09	2.14931e+09	2.04973e+09	1.95964e+09	2.03845e+09	1.9889e+09	2.11804e+09	2.09638e+09	2.12603e+09
High	High	Master Protein	P49327	Fatty acid synthase OS=Homo sapiens GN=FASN PE=1 SV=3	0	0	67	140	6549	139	1	2511	273.3	6.44	149080	8313.63	140	89	1	3.47208e+10	3.39623e+10	3.27829e+10	3.56434e+10	3.75571e+10	3.53334e+10	3.50298e+10	3.49021e+10	3.33628e+10	Acetyl [N-Term]
High	High	Master Protein	P35579	Myosin-9 OS=Homo sapiens GN=MYH9 PE=1 SV=4	0	0	69	165	5577	133	1	1960	226.4	5.6	136787	7635.9	162	107	39	1.69612e+10	1.69018e+10	1.6236e+10	2.11992e+10	2.15992e+10	2.2064e+10	1.92554e+10	1.96761e+10	1.89741e+10
High	High	Master Protein	P08238	Heat shock protein HSP 90-beta OS=Homo sapiens GN=HSP90AB1 PE=1 SV=4	0	0	66	54	5923	37	1	724	83.2	5.03	125222	7415.72	53	38	17	4.74989e+10	5.04455e+10	4.68951e+10	5.5612e+10	6.06835e+10	5.79469e+10	5.42941e+10	5.26157e+10	5.1475e+10
High	High	Master Protein	P68366	Tubulin alpha-4A chain OS=Homo sapiens GN=TUBA4A PE=1 SV=1	0	0	77	29	4737	9	1	448	49.9	5.06	105299	6981.68	29	21	0	3.09309e+09	3.39215e+09	3.23679e+09	3.35273e+09	3.87467e+09	3.63757e+09	3.46089e+09	3.48614e+09	2972260849
High	High	Master Protein	P14618	Pyruvate kinase PKM OS=Homo sapiens GN=PKM PE=1 SV=4	0	0	78	49	4509	48	1	531	57.9	7.84	109567	6897.32	49	35	1	2.16741e+10	2.05455e+10	2.01294e+10	2.57807e+10	2.64157e+10	2.53071e+10	2.19917e+10	2.28658e+10	2.17795e+10	Acetyl [N-Term]
High	High	Master Protein	Q9BQE3	Tubulin alpha-1C chain OS=Homo sapiens GN=TUBA1C PE=1 SV=1	0	0	81	31	4570	3	1	449	49.9	5.1	104598	6443.96	31	21	39	3.42284e+10	3.52612e+10	3.4493e+10	3.99859e+10	3.74916e+10	3.50974e+10	3.26036e+10	3.58868e+10	3.03202e+10
High	High	None	Q13748	Tubulin alpha-3C/D chain OS=Homo sapiens GN=TUBA3C PE=1 SV=3	0	0	60	22	3817	1	1	450	49.9	5.1	82376	6413.37	22	17	0	2.12099e+09	2.05834e+09	1.96643e+09	1.87612e+09	1.94521e+09	1.91008e+09	1.90658e+09	1.96105e+09	1.96136e+09
High	High	None	Q6PEY2	Tubulin alpha-3E chain OS=Homo sapiens GN=TUBA3E PE=1 SV=2	0	0	51	16	3350	1	1	450	49.8	5.14	72157	5764.38	16	12	0	2.12099e+09	2.05834e+09	1.96643e+09	1.87612e+09	1.94521e+09	1.91008e+09	1.90658e+09	1.96105e+09	1.96136e+09
High	High	Master Protein	P07900	Heat shock protein HSP 90-alpha OS=Homo sapiens GN=HSP90AA1 PE=1 SV=5	0	0	64	49	4550	30	1	732	84.6	5.02	100904	5645.09	49	31	4	8.22145e+09	9.01235e+09	9.01434e+09	9.9942e+09	1.05822e+10	1.09699e+10	7.51934e+09	7.77979e+09	7.84396e+09
High	High	Master Protein	P12277	Creatine kinase B-type OS=Homo sapiens GN=CKB PE=1 SV=1	0	0	81	25	3799	24	1	381	42.6	5.59	87573	5570.55	24	20	2	1.89533e+10	2.14973e+10	1.9264e+10	2.50867e+10	2.43495e+10	2.451e+10	2.13989e+10	2.06652e+10	1.99037e+10
High	High	Master Protein	Q14204	Cytoplasmic dynein 1 heavy chain 1 OS=Homo sapiens GN=DYNC1H1 PE=1 SV=5	0	0	63	274	4753	274	1	4646	532.1	6.4	105933	5473.59	271	141	0	6.70115e+09	6.83028e+09	6.46774e+09	8.39927e+09	8.63167e+09	8.52753e+09	8.02487e+09	8.19741e+09	7.94587e+09	Acetyl [N-Term]
High	High	Master Protein	Q00610	Clathrin heavy chain 1 OS=Homo sapiens GN=CLTC PE=1 SV=5	0	0	66	101	3672	82	1	1675	191.5	5.69	84124	5137.7	101	70	22	1.08852e+10	1.08967e+10	1.06258e+10	1.26781e+10	1.32771e+10	1.29074e+10	1.22121e+10	1.18559e+10	1.16795e+10	Acetyl [N-Term]
High	High	Master Protein	P07437	Tubulin beta chain OS=Homo sapiens GN=TUBB PE=1 SV=2	0	0	82	32	4523	5	1	444	49.6	4.89	110369	5009.42	32	24	2	8.13227e+09	8.3152e+09	8.39358e+09	9.04351e+09	1.08052e+10	8.93768e+09	8.01668e+09	8.89187e+09	7.82294e+09	Acetyl [N-Term]
High	High	Master Protein	P14625	Endoplasmin OS=Homo sapiens GN=HSP90B1 PE=1 SV=1	0	0	68	55	3120	53	1	803	92.4	4.84	65053	4848.33	55	30	2	1.54573e+10	1.41184e+10	1.36053e+10	1.75864e+10	1.66002e+10	1.6974e+10	1.77851e+10	1.61218e+10	1.60443e+10
High	High	Master Protein	O75369	Filamin-B OS=Homo sapiens GN=FLNB PE=1 SV=2	0	0	76	156	3440	147	1	2602	278	5.73	80155	4554.88	154	97	11	5.13685e+09	5.36492e+09	4.99022e+09	6.80178e+09	6.82968e+09	6.63055e+09	6.72611e+09	6.47181e+09	6.38601e+09
High	High	Master Protein	P07814	Bifunctional glutamate/proline--tRNA ligase OS=Homo sapiens GN=EPRS PE=1 SV=5	0	0	72	103	3129	102	1	1512	170.5	7.33	70653	4191.1	103	62	1	7.04409e+09	7.2147e+09	6.81507e+09	9.70074e+09	9.89505e+09	9.68195e+09	9.94276e+09	1.02487e+10	9.88243e+09	Acetyl [N-Term]
High	High	Master Protein	P35580	Myosin-10 OS=Homo sapiens GN=MYH10 PE=1 SV=3	0	0	65	149	3011	118	1	1976	228.9	5.54	72622	4127.86	148	83	9	3.18461e+09	3.22292e+09	3.12387e+09	4.36426e+09	4.43811e+09	4.48016e+09	4.27076e+09	4.13043e+09	4.07741e+09
High	High	Master Protein	P11142	Heat shock cognate 71 kDa protein OS=Homo sapiens GN=HSPA8 PE=1 SV=1	0	0	67	37	3107	32	1	646	70.9	5.52	70797	4040.26	36	26	4	3.20562e+10	3.21509e+10	3.08987e+10	3.75681e+10	3.85083e+10	3.90125e+10	3.30295e+10	3.29862e+10	3.41492e+10
High	High	Master Protein	P78527	DNA-dependent protein kinase catalytic subunit OS=Homo sapiens GN=PRKDC PE=1 SV=3	0	0	53	219	3874	219	1	4128	468.8	7.12	91052	3975.74	216	102	0	6.45938e+09	6.82095e+09	6.43715e+09	7.62333e+09	7.57751e+09	7.57868e+09	6.08784e+09	5.92458e+09	5.87001e+09
High	High	Master Protein	P68371	Tubulin beta-4B chain OS=Homo sapiens GN=TUBB4B PE=1 SV=1	0	0	82	32	3886	1	1	445	49.8	4.89	97915	3960.38	32	25	43	3.792e+10	3.72994e+10	3.47496e+10	4.48643e+10	4.47341e+10	4.49049e+10	4.08544e+10	3.78443e+10	3.58428e+10	Acetyl [N-Term]
High	High	Master Protein	P05783	Keratin, type I cytoskeletal 18 OS=Homo sapiens GN=KRT18 PE=1 SV=2	0	0	83	44	2420	42	1	430	48	5.45	62697	3842.99	44	17	2	9.68695e+09	9.82527e+09	9.41005e+09	1.22915e+10	1.18544e+10	1.1943e+10	1.0778e+10	1.03583e+10	1.03812e+10
High	High	Master Protein	Q9UM54	Unconventional myosin-VI OS=Homo sapiens GN=MYO6 PE=1 SV=4	0	0	66	91	3096	91	1	1294	149.6	8.53	77717	3811.04	91	53	0	8.40329e+09	8.69342e+09	8.44709e+09	1.01528e+10	1.06598e+10	1.03616e+10	9.78919e+09	9.81267e+09	9.41583e+09	Acetyl [N-Term]
High	High	Master Protein	Q9Y490	Talin-1 OS=Homo sapiens GN=TLN1 PE=1 SV=3	0	0	69	142	2839	123	1	2541	269.6	6.07	68704	3807.67	141	80	20	2.47792e+09	2.53846e+09	2.4832e+09	3.53935e+09	3.62735e+09	3.66374e+09	3.4701e+09	3.52421e+09	3.41672e+09
High	High	Master Protein	P49588	Alanine--tRNA ligase, cytoplasmic OS=Homo sapiens GN=AARS PE=1 SV=2	0	0	71	55	2528	55	1	968	106.7	5.53	58604	3728.26	55	34	0	5.65936e+09	5.82075e+09	5.46178e+09	8.09648e+09	8.2964e+09	8.17287e+09	6.95683e+09	6.94887e+09	6.83173e+09	Acetyl [N-Term]
High	High	Master Protein	P55072	Transitional endoplasmic reticulum ATPase OS=Homo sapiens GN=VCP PE=1 SV=4	0	0	77	67	2659	67	1	806	89.3	5.26	62590	3708.81	67	43	0	8.20526e+09	8.68068e+09	8.14748e+09	1.05573e+10	1.13524e+10	1.11627e+10	1.05721e+10	10990380184	1.03371e+10	Acetyl [N-Term]
High	High	Master Protein	Q14980	Nuclear mitotic apparatus protein 1 OS=Homo sapiens GN=NUMA1 PE=1 SV=2	0	0	71	141	2700	140	1	2115	238.1	5.78	68314	3701.35	139	87	1	3.65199e+09	3.57492e+09	3.5052e+09	4.65388e+09	4.78801e+09	4.7385e+09	3.85803e+09	3.98623e+09	3.7765e+09
High	High	Master Protein	P09651	Heterogeneous nuclear ribonucleoprotein A1 OS=Homo sapiens GN=HNRNPA1 PE=1 SV=5	0	0	67	31	2642	12	1	372	38.7	9.13	68541	3649.19	31	23	18	1.02188e+10	9.95049e+09	1.00796e+10	1.17829e+10	1.22834e+10	1.19553e+10	1.22995e+10	1.27005e+10	1.17318e+10
High	High	Master Protein	P13639	Elongation factor 2 OS=Homo sapiens GN=EEF2 PE=1 SV=4	0	0	78	72	3324	70	1	858	95.3	6.83	76114	3593.21	72	42	2	2.07148e+10	2.04158e+10	2.09049e+10	2.81231e+10	2.99288e+10	2.87262e+10	3.0118e+10	3.11626e+10	2.89167e+10
High	High	Master Protein	O43175	D-3-phosphoglycerate dehydrogenase OS=Homo sapiens GN=PHGDH PE=1 SV=4	0	0	60	28	2429	28	1	533	56.6	6.71	55481	3578.21	28	19	0	7.57026e+09	7.65263e+09	7.32353e+09	1.01908e+10	1.09985e+10	1.05382e+10	8.92375e+09	9.29366e+09	8.67179e+09	Acetyl [N-Term]
High	High	Master Protein	P22314	Ubiquitin-like modifier-activating enzyme 1 OS=Homo sapiens GN=UBA1 PE=1 SV=3	0	0	70	56	2244	56	1	1058	117.8	5.76	53207	3545.88	56	38	0	5.16925e+09	5.31765e+09	4.8646e+09	6.13595e+09	6.33963e+09	6.60364e+09	5.7917e+09	5.95348e+09	5.46242e+09
High	High	Master Protein	P13929	Beta-enolase OS=Homo sapiens GN=ENO3 PE=1 SV=5	0	0	42	14	2088	6	1	434	47	7.71	46211	3505.81	14	9	0	1.54587e+07	1.52785e+07	1.64427e+07	2.17118e+07	1.9375e+07	4.39004e+08	1.83792e+07	2.10988e+07	1.7735e+07
High	High	Master Protein	Q15149	Plectin OS=Homo sapiens GN=PLEC PE=1 SV=3	0	0	63	316	3691	305	1	4684	531.5	5.96	86307	3492.78	310	132	12	4.21464e+09	4.32924e+09	4.24174e+09	5.61574e+09	5.88802e+09	5.8119e+09	5.30119e+09	5.46291e+09	5.21439e+09
High	High	Master Protein Rejected	Q6S8J3	POTE ankyrin domain family member E OS=Homo sapiens GN=POTEE PE=2 SV=3	0	0	10	11	2582	0	0	1075	121.3	6.2	57791	3446.72	11	5	0
High	High	Master Protein	P04350	Tubulin beta-4A chain OS=Homo sapiens GN=TUBB4A PE=1 SV=2	0	0	82	30	3443	4	1	444	49.6	4.88	88565	3396.65	30	25	2	5.15023e+08	5.03962e+08	4.99597e+08	5.61033e+08	5.67402e+08	5.84399e+08	6.10284e+08	5.59224e+08	5.00803e+08	Acetyl [N-Term]
High	High	Master Protein	P78371	T-complex protein 1 subunit beta OS=Homo sapiens GN=CCT2 PE=1 SV=4	0	0	84	38	2181	38	1	535	57.5	6.46	52545	3349.08	38	26	0	4.80915e+09	4.925e+09	4.64664e+09	6.15585e+09	6.09115e+09	6.09211e+09	5.61171e+09	5.59551e+09	5.59839e+09	Acetyl [N-Term]
High	High	Master Protein	P21333	Filamin-A OS=Homo sapiens GN=FLNA PE=1 SV=4	0	0	67	137	2582	128	1	2647	280.6	6.06	61971	3346.78	136	90	0	3.23175e+09	3.35526e+09	3.4066e+09	4.36954e+09	4.49726e+09	4.46464e+09	4.22748e+09	4.26049e+09	4.1746e+09
High	High	Master Protein Rejected	Q9NY65	Tubulin alpha-8 chain OS=Homo sapiens GN=TUBA8 PE=1 SV=1	0	0	34	15	2589	0	0	449	50.1	5.06	63997	3335.06	15	12	0
High	High	Master Protein	Q9BVA1	Tubulin beta-2B chain OS=Homo sapiens GN=TUBB2B PE=1 SV=1	0	0	83	32	3348	1	1	445	49.9	4.89	82765	3321	32	24	6	5.08025e+07	7.95416e+07	9.68974e+07	73153950	9.66812e+07	9.9431e+07	89067740	8.8851e+07	7.85844e+07	Acetyl [N-Term]
High	High	Master Protein	Q7Z6Z7	E3 ubiquitin-protein ligase HUWE1 OS=Homo sapiens GN=HUWE1 PE=1 SV=3	0	0	52	171	2595	171	1	4374	481.6	5.22	65813	3288.92	170	85	0	2.00704e+09	2.03611e+09	1.96196e+09	2.71471e+09	2.77963e+09	2.76384e+09	2.62078e+09	2.71609e+09	2.57383e+09
High	High	Master Protein	Q13263	Transcription intermediary factor 1-beta OS=Homo sapiens GN=TRIM28 PE=1 SV=5	0	0	73	41	2097	41	1	835	88.5	5.77	51574	3180.06	41	25	0	6.88848e+09	6.78132e+09	6.03561e+09	8.09833e+09	8.18379e+09	8.31974e+09	7.62195e+09	7.58046e+09	7.61809e+09	Acetyl [N-Term]
High	High	Master Protein	P09104	Gamma-enolase OS=Homo sapiens GN=ENO2 PE=1 SV=3	0	0	69	21	1893	14	1	434	47.2	5.03	41874	3177.84	21	14	4	2.24235e+08	2.36593e+08	2.35826e+08	351863666	3.27292e+08	3.42365e+08	2.94286e+08	286748962	2.85555e+08
High	High	Master Protein	Q13885	Tubulin beta-2A chain OS=Homo sapiens GN=TUBB2A PE=1 SV=1	0	0	73	31	3277	1	1	445	49.9	4.89	82645	3170.62	31	24	0	10743497	1.27116e+07	10994519	1.52185e+07	1.60543e+07	1.48401e+07	16072138	1.47351e+07	1.51746e+07	Acetyl [N-Term]
High	High	Master Protein	P11717	Cation-independent mannose-6-phosphate receptor OS=Homo sapiens GN=IGF2R PE=1 SV=3	0	0	58	119	2383	119	1	2491	274.2	5.94	55948	3155.68	118	73	0	3.58895e+09	3.6224e+09	3.40388e+09	3.99642e+09	4.2296e+09	4.09824e+09	4.17735e+09	4.10343e+09	4.07888e+09
High	High	Master Protein	P49792	E3 SUMO-protein ligase RanBP2 OS=Homo sapiens GN=RANBP2 PE=1 SV=2	0	0	68	178	2610	123	1	3224	358	6.2	63688	3062.16	177	97	51	1.78111e+09	1.82933e+09	1.76152e+09	2.38727e+09	2.38184e+09	2.36648e+09	2.44042e+09	2.40314e+09	2.36751e+09
High	High	Master Protein	P34932	Heat shock 70 kDa protein 4 OS=Homo sapiens GN=HSPA4 PE=1 SV=4	0	0	80	68	2366	65	1	840	94.3	5.19	53123	3049.74	68	45	4	4.89383e+09	4.79937e+09	4.62423e+09	6.03179e+09	6.10022e+09	6.12881e+09	6.1247e+09	6.12902e+09	5.6773e+09
High	High	Master Protein	P04075	Fructose-bisphosphate aldolase A OS=Homo sapiens GN=ALDOA PE=1 SV=2	0	0	86	34	2128	29	1	364	39.4	8.09	42886	2976.87	33	23	5	1.07008e+10	1.11499e+10	1.12714e+10	1.33015e+10	1.38839e+10	1.35264e+10	1.18143e+10	1.30275e+10	1.2395e+10
High	High	Master Protein	P58107	Epiplakin OS=Homo sapiens GN=EPPK1 PE=1 SV=2	0	0	72	149	2318	139	1	5090	555.3	5.6	55228	2956.2	146	80	0	2.20162e+09	2.2681e+09	2.17778e+09	2.44905e+09	2.38261e+09	2.32109e+09	2674007985	2.5987e+09	2.58357e+09	Acetyl [N-Term]
High	High	Master Protein	Q92616	eIF-2-alpha kinase activator GCN1 OS=Homo sapiens GN=GCN1 PE=1 SV=6	0	0	63	155	2580	155	1	2671	292.6	7.47	62172	2891.77	153	80	0	3.56458e+09	3.52589e+09	3.45769e+09	4.51741e+09	4.66583e+09	4.57127e+09	3.87427e+09	3.83505e+09	3.62631e+09	Acetyl [N-Term]
High	High	Master Protein	Q32P51	Heterogeneous nuclear ribonucleoprotein A1-like 2 OS=Homo sapiens GN=HNRNPA1L2 PE=2 SV=2	0	0	48	20	1957	1	1	320	34.2	9	48536	2805.73	20	15	0	698458	182854	230295	575778	506357	497211	424063	376908	440528
High	High	Master Protein	P60842	Eukaryotic initiation factor 4A-I OS=Homo sapiens GN=EIF4A1 PE=1 SV=1	0	0	75	31	1954	14	1	406	46.1	5.48	46774	2795.63	30	15	21	1.07575e+10	1.1012e+10	1.10855e+10	1.21483e+10	1.27135e+10	1.33204e+10	1.21256e+10	1.21877e+10	1.20762e+10
High	High	Master Protein	P62258	14-3-3 protein epsilon OS=Homo sapiens GN=YWHAE PE=1 SV=1	0	0	80	25	2374	22	1	255	29.2	4.74	56865	2764.45	25	17	4	1.89006e+10	1.95573e+10	1.98471e+10	2.24818e+10	2.23266e+10	2.22611e+10	2.08481e+10	2.11789e+10	2.16596e+10	Acetyl [N-Term]
High	High	Master Protein	Q13085	Acetyl-CoA carboxylase 1 OS=Homo sapiens GN=ACACA PE=1 SV=2	0	0	65	124	2093	108	1	2346	265.4	6.37	45641	2744.81	122	74	16	2.80921e+09	2.91562e+09	2.88371e+09	3.39093e+09	3.49402e+09	3.40584e+09	3.10731e+09	3.169e+09	3.10189e+09	Acetyl [N-Term]
High	High	Master Protein	P11021	78 kDa glucose-regulated protein OS=Homo sapiens GN=HSPA5 PE=1 SV=2	0	0	61	44	2176	41	1	654	72.3	5.16	52499	2712.73	44	30	3	1.28604e+10	1.33563e+10	1.31214e+10	1.65142e+10	1.66244e+10	1.87113e+10	1.53093e+10	1.49478e+10	1.44105e+10
High	High	Master Protein	Q14568	Heat shock protein HSP 90-alpha A2 OS=Homo sapiens GN=HSP90AA2P PE=1 SV=2	0	0	28	8	1603	1	1	343	39.3	4.65	29185	2665.96	8	5	0
High	High	Master Protein	P00558	Phosphoglycerate kinase 1 OS=Homo sapiens GN=PGK1 PE=1 SV=3	0	0	71	27	1900	22	1	417	44.6	8.1	46823	2663.73	27	14	6	1.21696e+10	1.29786e+10	1.25817e+10	1.75099e+10	1.78119e+10	1.75867e+10	1.41944e+10	1.45302e+10	1.44793e+10
High	High	Master Protein	P38646	Stress-70 protein, mitochondrial OS=Homo sapiens GN=HSPA9 PE=1 SV=2	0	0	64	47	1850	47	1	679	73.6	6.16	47447	2646.31	47	29	0	5.23526e+09	5.29012e+09	4.95973e+09	7.42933e+09	7.50516e+09	7.40141e+09	6.73852e+09	6.88341e+09	6.46761e+09
High	High	Master Protein	P13010	X-ray repair cross-complementing protein 5 OS=Homo sapiens GN=XRCC5 PE=1 SV=3	0	0	65	43	1687	43	1	732	82.7	5.81	35873	2616.71	43	23	0	4.84126e+09	5.04778e+09	4.75343e+09	5.73385e+09	5.9826e+09	5.7867e+09	5.15912e+09	5.09832e+09	5.14461e+09
High	High	Master Protein	Q00796	Sorbitol dehydrogenase OS=Homo sapiens GN=SORD PE=1 SV=4	0	0	79	29	1661	29	1	357	38.3	7.97	38466	2515.7	29	17	0	4.43689e+09	4.88037e+09	4.98855e+09	6.749e+09	6.60239e+09	6.6826e+09	4.66353e+09	4.93047e+09	4.6314e+09	Acetyl [N-Term]
High	High	Master Protein	P52272	Heterogeneous nuclear ribonucleoprotein M OS=Homo sapiens GN=HNRNPM PE=1 SV=3	0	0	77	49	2353	49	1	730	77.5	8.7	55752	2504.22	45	25	0	8.8032e+09	8.10118e+09	7.77779e+09	9.64709e+09	9.77637e+09	9.84947e+09	8.53637e+09	8.86717e+09	8.77803e+09	Acetyl [N-Term; N-Term]
High	High	Master Protein	Q13228	Selenium-binding protein 1 OS=Homo sapiens GN=SELENBP1 PE=1 SV=2	0	0	86	36	1821	36	1	472	52.4	6.37	40603	2413.1	36	22	0	5.52928e+09	5.39814e+09	5.38988e+09	8.0398e+09	8922012014	8.1962e+09	7.64707e+09	7.95855e+09	7.39379e+09
High	High	Master Protein	P06576	ATP synthase subunit beta, mitochondrial OS=Homo sapiens GN=ATP5B PE=1 SV=3	0	0	77	28	1801	28	1	529	56.5	5.4	41564	2398.64	28	21	0	6.8096e+09	7.25725e+09	7.16616e+09	8.95351e+09	9.18088e+09	9.03363e+09	7.73305e+09	7.76272e+09	7.41245e+09
High	High	Master Protein	Q12906	Interleukin enhancer-binding factor 3 OS=Homo sapiens GN=ILF3 PE=1 SV=3	0	0	73	54	2166	48	1	894	95.3	8.76	54851	2385.86	54	30	8	4.75633e+09	4.73412e+09	4.52307e+09	5.69697e+09	5.59222e+09	5.62775e+09	5.3791e+09	5.12211e+09	5.17471e+09
High	High	Master Protein	Q08211	ATP-dependent RNA helicase A OS=Homo sapiens GN=DHX9 PE=1 SV=4	0	0	60	60	1764	60	1	1270	140.9	6.84	41074	2372.24	60	33	0	4.02528e+09	4.05059e+09	3.91093e+09	4.83677e+09	4.98201e+09	4.88211e+09	4.27879e+09	4.18442e+09	4302287131
High	High	Master Protein	O43707	Alpha-actinin-4 OS=Homo sapiens GN=ACTN4 PE=1 SV=2	0	0	73	66	1977	46	1	911	104.8	5.44	46751	2370.05	65	45	23	4.65821e+09	5.04103e+09	4.72303e+09	6.29183e+09	6.0217e+09	6.02689e+09	6.20112e+09	5.72105e+09	5.67284e+09
High	High	Master Protein	P60174	Triosephosphate isomerase OS=Homo sapiens GN=TPI1 PE=1 SV=3	0	0	73	19	1716	19	1	286	30.8	5.92	39780	2363.82	19	16	0	1.52074e+10	1.45951e+10	1.433e+10	1.86279e+10	1.92804e+10	1.84561e+10	1.6933e+10	1.74216e+10	1.64568e+10
High	High	Master Protein	Q13813	Spectrin alpha chain, non-erythrocytic 1 OS=Homo sapiens GN=SPTAN1 PE=1 SV=3	0	0	68	165	2032	165	1	2472	284.4	5.35	49772	2359.88	165	85	0	1.51281e+09	1.55791e+09	1.4953e+09	2.15622e+09	2.29296e+09	2.23185e+09	1.81944e+09	1.83685e+09	1.73388e+09
High	High	Master Protein	P50851	Lipopolysaccharide-responsive and beige-like anchor protein OS=Homo sapiens GN=LRBA PE=1 SV=4	0	0	59	137	2150	128	1	2863	318.9	5.6	52957	2359.45	136	70	9	2.13781e+09	2.36583e+09	2.11681e+09	2.83076e+09	2.97081e+09	2.88776e+09	2.91206e+09	2.98815e+09	2.88703e+09	Acetyl [N-Term]
High	High	Master Protein	P25705	ATP synthase subunit alpha, mitochondrial OS=Homo sapiens GN=ATP5A1 PE=1 SV=1	0	0	63	32	1715	32	1	553	59.7	9.13	43665	2346.88	31	18	0	7.8111e+09	8.0255e+09	7.30539e+09	9.64663e+09	1.04979e+10	9.73337e+09	8.94825e+09	9.15239e+09	8.99486e+09
High	High	Master Protein	Q09666	Neuroblast differentiation-associated protein AHNAK OS=Homo sapiens GN=AHNAK PE=1 SV=2	0	0	63	195	2072	195	1	5890	628.7	6.15	46087	2346.17	190	94	0	1.57132e+09	1.68659e+09	1.61086e+09	1867987849	1.9319e+09	1.91036e+09	1.46475e+09	1.40438e+09	1.39095e+09
High	High	Master Protein	P21796	Voltage-dependent anion-selective channel protein 1 OS=Homo sapiens GN=VDAC1 PE=1 SV=2	0	0	73	20	1542	19	1	283	30.8	8.54	41694	2325.37	20	15	1	2.58868e+09	2.84591e+09	2.74721e+09	3.75569e+09	3.94213e+09	3.60921e+09	3.57922e+09	3.50678e+09	3.32603e+09	Acetyl [N-Term]
High	High	Master Protein	O75643	U5 small nuclear ribonucleoprotein 200 kDa helicase OS=Homo sapiens GN=SNRNP200 PE=1 SV=2	0	0	59	119	1890	118	1	2136	244.4	6.06	43795	2308.57	119	63	1	2.50201e+09	2.51174e+09	2.37048e+09	3.26066e+09	3.19547e+09	3.22404e+09	3.03005e+09	2.89455e+09	2.81127e+09
High	High	Master Protein	Q14789	Golgin subfamily B member 1 OS=Homo sapiens GN=GOLGB1 PE=1 SV=2	0	0	64	172	1836	172	1	3259	375.8	5	42582	2279.21	167	90	0	8.25425e+08	8.53095e+08	7.97538e+08	1.07994e+09	1.09566e+09	1.08341e+09	1.0658e+09	1.04935e+09	1.03853e+09
High	High	Master Protein	P12270	Nucleoprotein TPR OS=Homo sapiens GN=TPR PE=1 SV=3	0	0	53	126	2085	125	1	2363	267.1	5.02	51244	2257.19	126	69	1	2.57638e+09	2.56968e+09	2.52557e+09	3.14125e+09	3.23842e+09	3.19619e+09	2.66436e+09	2.64346e+09	2.62606e+09	Acetyl [N-Term]
High	High	Master Protein	P29401	Transketolase OS=Homo sapiens GN=TKT PE=1 SV=3	0	0	76	37	1516	37	1	623	67.8	7.66	32512	2257.14	37	22	0	4.7767e+09	4.66526e+09	4.73156e+09	5.16501e+09	5.44979e+09	5.6428e+09	5.10478e+09	5.76652e+09	4.89909e+09	Acetyl [N-Term]
High	High	Master Protein	Q99832	T-complex protein 1 subunit eta OS=Homo sapiens GN=CCT7 PE=1 SV=2	0	0	67	36	1512	36	1	543	59.3	7.65	38818	2224.02	36	22	0	3.04343e+09	3.08871e+09	2.92109e+09	3.50442e+09	3.56776e+09	3.44429e+09	3.48975e+09	3.33064e+09	3.44966e+09	Acetyl [N-Term]
High	High	Master Protein	Q13509	Tubulin beta-3 chain OS=Homo sapiens GN=TUBB3 PE=1 SV=2	0	0	70	26	2009	7	1	450	50.4	4.93	44809	2204.53	26	20	2	1.0189e+08	8.77423e+07	8.80768e+07	1.12672e+08	1.14143e+08	1.21013e+08	1.17112e+08	1.1731e+08	1.21105e+08	Acetyl [N-Term]
High	High	Master Protein	P15924	Desmoplakin OS=Homo sapiens GN=DSP PE=1 SV=3	0	0	63	185	2115	184	1	2871	331.6	6.81	46540	2152.73	184	69	1	2.18371e+09	2.20165e+09	2.09767e+09	2.85817e+09	2.84007e+09	2.90063e+09	2.30114e+09	2.38712e+09	2.35116e+09	Acetyl [N-Term]
High	High	Master Protein	P26599	Polypyrimidine tract-binding protein 1 OS=Homo sapiens GN=PTBP1 PE=1 SV=1	0	0	73	26	1522	24	1	531	57.2	9.17	35520	2116.7	26	17	3	3.21761e+09	3.40063e+09	3.33884e+09	4.33376e+09	4.39231e+09	4.60523e+09	3.82937e+09	3.97906e+09	3.83326e+09	Acetyl [N-Term]
High	High	Master Protein	P06748	Nucleophosmin OS=Homo sapiens GN=NPM1 PE=1 SV=2	0	0	65	18	1770	18	1	294	32.6	4.78	41321	2112.67	18	11	0	1.27571e+10	1.23125e+10	1.16858e+10	1.54816e+10	1.61627e+10	1.71814e+10	1.41087e+10	1.55532e+10	1.38864e+10	Acetyl [N-Term]
High	High	Master Protein	P52597	Heterogeneous nuclear ribonucleoprotein F OS=Homo sapiens GN=HNRNPF PE=1 SV=3	0	0	67	20	1402	18	1	415	45.6	5.58	36836	2106.12	20	11	0	2.51035e+09	2.32463e+09	2.26452e+09	2.79717e+09	2.72578e+09	2.64108e+09	2.66694e+09	2.57171e+09	2.5476e+09	Acetyl [N-Term; N-Term]
High	High	Master Protein	P30101	Protein disulfide-isomerase A3 OS=Homo sapiens GN=PDIA3 PE=1 SV=4	0	0	70	37	1637	36	1	505	56.7	6.35	40474	2088.64	37	23	0	9.19138e+09	9.5216e+09	9.29618e+09	1.12818e+10	1.1048e+10	1.14518e+10	1.038e+10	1.01277e+10	1.01241e+10
High	High	Master Protein	Q9P2E9	Ribosome-binding protein 1 OS=Homo sapiens GN=RRBP1 PE=1 SV=4	0	0	59	84	1698	82	1	1410	152.4	8.6	42866	2060.3	84	47	2	1.43187e+09	1.45414e+09	1.44796e+09	2.08607e+09	2.10352e+09	2.13922e+09	1.84494e+09	1.84965e+09	1.77819e+09
High	High	Master Protein	P09874	Poly [ADP-ribose] polymerase 1 OS=Homo sapiens GN=PARP1 PE=1 SV=4	0	0	60	69	1572	69	1	1014	113	8.88	37390	2057.07	68	37	0	5.16156e+09	5.50558e+09	5.17666e+09	6.39275e+09	6.71044e+09	6.35986e+09	4.68786e+09	4.8542e+09	4.70407e+09
High	High	Master Protein	Q9UPN3	Microtubule-actin cross-linking factor 1, isoforms 1/2/3/5 OS=Homo sapiens GN=MACF1 PE=1 SV=4	0	0	34	187	1692	182	1	7388	837.8	5.39	39113	2020.24	182	110	4	5.34078e+08	5.62567e+08	5.41181e+08	7.16684e+08	7.1931e+08	7.22399e+08	5.91958e+08	6.01596e+08	5.99343e+08
High	High	Master Protein	Q13011	Delta(3,5)-Delta(2,4)-dienoyl-CoA isomerase, mitochondrial OS=Homo sapiens GN=ECH1 PE=1 SV=2	0	0	74	19	1200	19	1	328	35.8	8	28229	2014.76	18	11	0	2.61346e+09	2.90818e+09	2.82901e+09	3.62248e+09	3.72347e+09	3.83967e+09	3.47994e+09	3.51186e+09	3.41849e+09
High	High	Master Protein	P41252	Isoleucine--tRNA ligase, cytoplasmic OS=Homo sapiens GN=IARS PE=1 SV=2	0	0	58	62	1409	62	1	1262	144.4	6.15	32308	2014.27	60	36	0	2.42128e+09	2.43171e+09	2.41995e+09	3.24021e+09	3.32764e+09	3.30223e+09	3.2253e+09	3.16927e+09	3.13235e+09	Acetyl [N-Term]
High	High	Master Protein	P23528	Cofilin-1 OS=Homo sapiens GN=CFL1 PE=1 SV=3	0	0	80	17	1378	12	1	166	18.5	8.09	29145	2011.81	17	10	6	1.01897e+10	1.05306e+10	1.01429e+10	1.3633e+10	1.35139e+10	1.35255e+10	1.30741e+10	1.36576e+10	1.39057e+10	Acetyl [N-Term]
High	High	Master Protein	P51659	Peroxisomal multifunctional enzyme type 2 OS=Homo sapiens GN=HSD17B4 PE=1 SV=3	0	0	65	43	1316	43	1	736	79.6	8.84	31847	2008.38	42	28	0	2.06126e+09	2.03199e+09	1.97326e+09	2.45747e+09	2.58736e+09	2.5686e+09	2.56669e+09	2.69337e+09	2.36592e+09
High	High	Master Protein	P22626	Heterogeneous nuclear ribonucleoproteins A2/B1 OS=Homo sapiens GN=HNRNPA2B1 PE=1 SV=2	0	0	73	32	2030	29	1	353	37.4	8.95	59117	2004.28	32	20	3	1.2333e+10	1.20717e+10	1.16418e+10	1.35829e+10	1.29915e+10	1.34618e+10	1.27113e+10	1.26628e+10	1.26819e+10
High	High	Master Protein	P48643	T-complex protein 1 subunit epsilon OS=Homo sapiens GN=CCT5 PE=1 SV=1	0	0	76	39	1491	38	1	541	59.6	5.66	33010	1990.32	38	22	0	3.97652e+09	4.16611e+09	3.92845e+09	5.02598e+09	5.04885e+09	5.11361e+09	4.70559e+09	4.808e+09	4.49293e+09	Acetyl [N-Term]
High	High	Master Protein	P05023	Sodium/potassium-transporting ATPase subunit alpha-1 OS=Homo sapiens GN=ATP1A1 PE=1 SV=1	0	0	50	52	1502	35	1	1023	112.8	5.49	35573	1989.89	52	28	24	3.16313e+09	3.00915e+09	2.91156e+09	3.8431e+09	3.81359e+09	3.76738e+09	3.53525e+09	3.4982e+09	3.41664e+09
High	High	Master Protein	P50991	T-complex protein 1 subunit delta OS=Homo sapiens GN=CCT4 PE=1 SV=4	0	0	74	39	1479	38	1	539	57.9	7.83	34497	1971.81	39	24	1	3.6516e+09	3.64295e+09	3.65081e+09	4.35277e+09	4.60534e+09	4.45754e+09	4.286e+09	4.25962e+09	4.19303e+09
High	High	Master Protein	P43243	Matrin-3 OS=Homo sapiens GN=MATR3 PE=1 SV=2	0	0	65	58	1483	58	1	847	94.6	6.25	32099	1970.24	57	38	0	4.03777e+09	3.85894e+09	3.87895e+09	4.64004e+09	4.6909e+09	4.64724e+09	4.12801e+09	4.30548e+09	3.94705e+09
High	High	Master Protein	Q96KP4	Cytosolic non-specific dipeptidase OS=Homo sapiens GN=CNDP2 PE=1 SV=2	0	0	87	39	1553	39	1	475	52.8	5.97	36291	1968.23	39	24	0	5.83916e+09	5.88316e+09	5.70941e+09	7.41527e+09	7.33057e+09	7.3758e+09	6.45075e+09	6.30575e+09	6.2e+09	Acetyl [N-Term]
High	High	Master Protein	Q15365	Poly(rC)-binding protein 1 OS=Homo sapiens GN=PCBP1 PE=1 SV=2	0	0	85	20	1367	14	1	356	37.5	7.09	33217	1921.23	20	13	0	1.9462e+09	2.47047e+09	2.35916e+09	2.98822e+09	2.80005e+09	2.84529e+09	2.60964e+09	2.39891e+09	2.21563e+09
High	High	Master Protein	Q99460	26S proteasome non-ATPase regulatory subunit 1 OS=Homo sapiens GN=PSMD1 PE=1 SV=2	0	0	64	53	1549	53	1	953	105.8	5.39	37959	1919.26	52	33	0	2.06196e+09	2.16316e+09	2.01592e+09	2.57523e+09	2.78474e+09	2.74253e+09	2.29865e+09	2.33815e+09	2.24131e+09
High	High	Master Protein	P33176	Kinesin-1 heavy chain OS=Homo sapiens GN=KIF5B PE=1 SV=1	0	0	73	73	1518	57	1	963	109.6	6.51	35999	1911.94	72	46	15	1.95035e+09	1.97717e+09	1.82926e+09	2.72016e+09	2.83905e+09	2.81605e+09	2.39664e+09	2.39843e+09	2.407e+09	Acetyl [N-Term]
High	High	Master Protein	Q9C0C2	182 kDa tankyrase-1-binding protein OS=Homo sapiens GN=TNKS1BP1 PE=1 SV=4	0	0	76	90	1404	90	1	1729	181.7	4.86	36823	1898.55	89	56	0	8.17247e+08	8.09219e+08	7.92356e+08	1.16882e+09	1.16834e+09	1.18771e+09	1.05427e+09	1.036e+09	1.00228e+09
High	High	Master Protein	P46939	Utrophin OS=Homo sapiens GN=UTRN PE=1 SV=2	0	0	52	162	1717	159	1	3433	394.2	5.33	39722	1872.01	161	81	2	1.3117e+09	1.27946e+09	1.22943e+09	1.639e+09	1.64802e+09	1.6241e+09	1.34859e+09	1.35862e+09	1.35492e+09
High	High	Master Protein	Q00839	Heterogeneous nuclear ribonucleoprotein U OS=Homo sapiens GN=HNRNPU PE=1 SV=6	0	0	56	45	1513	44	1	825	90.5	6	35707	1862.82	44	23	2	6.54547e+09	6.79909e+09	6.72102e+09	8.33787e+09	8.31043e+09	8.04206e+09	7.5309e+09	7.60896e+09	6.91338e+09	Acetyl [N-Term]
High	High	Master Protein	Q9P2J5	Leucine--tRNA ligase, cytoplasmic OS=Homo sapiens GN=LARS PE=1 SV=2	0	0	62	71	1503	71	1	1176	134.4	7.3	31021	1848.29	70	38	0	2.17106e+09	2.19307e+09	2.11561e+09	2.98398e+09	3.09283e+09	3.0847e+09	2.78129e+09	2.76573e+09	2.63372e+09
High	High	Master Protein	O15020	Spectrin beta chain, non-erythrocytic 2 OS=Homo sapiens GN=SPTBN2 PE=1 SV=3	0	0	59	125	1529	115	1	2390	271.2	6.11	36507	1845.16	123	64	11	1.30717e+09	1.24504e+09	1.20943e+09	1.63632e+09	1.57903e+09	1.5789e+09	1.3544e+09	1.36821e+09	1342601433
High	High	Master Protein	P17987	T-complex protein 1 subunit alpha OS=Homo sapiens GN=TCP1 PE=1 SV=1	0	0	70	34	1353	34	1	556	60.3	6.11	34480	1843.6	34	23	0	3.79349e+09	3.47941e+09	3.29406e+09	3.99707e+09	3.88047e+09	3.95334e+09	4.12938e+09	3.90339e+09	3.7812e+09	Acetyl [N-Term]
High	High	Master Protein	P12268	Inosine-5'-monophosphate dehydrogenase 2 OS=Homo sapiens GN=IMPDH2 PE=1 SV=2	0	0	66	33	1251	31	1	514	55.8	6.9	29622	1835.47	33	20	2	3.28277e+09	3.40425e+09	3.23725e+09	3.81666e+09	4.06555e+09	3.99679e+09	3.87766e+09	3.97296e+09	3.6116e+09
High	High	Master Protein	P07954	Fumarate hydratase, mitochondrial OS=Homo sapiens GN=FH PE=1 SV=3	0	0	64	22	969	22	1	510	54.6	8.76	23053	1829.41	22	12	0	1.80675e+09	1.87483e+09	1.74954e+09	2.42555e+09	2.38848e+09	2.36994e+09	1.92254e+09	2.00363e+09	1.99989e+09
High	High	Master Protein	Q14974	Importin subunit beta-1 OS=Homo sapiens GN=KPNB1 PE=1 SV=2	0	0	58	43	1348	43	1	876	97.1	4.78	32742	1827.53	42	26	0	3.83031e+09	3.83874e+09	3.76514e+09	4.24981e+09	4.36784e+09	4.27802e+09	3.62985e+09	3.86035e+09	3.70409e+09	Acetyl [N-Term]
High	High	Master Protein	P22102	Trifunctional purine biosynthetic protein adenosine-3 OS=Homo sapiens GN=GART PE=1 SV=1	0	0	68	51	1281	51	1	1010	107.7	6.7	28200	1825.65	51	35	0	2.10906e+09	2.23268e+09	2.12209e+09	2.55692e+09	2.71104e+09	2.57716e+09	2.41668e+09	2.52189e+09	2.35741e+09
High	High	Master Protein	P05787	Keratin, type II cytoskeletal 8 OS=Homo sapiens GN=KRT8 PE=1 SV=7	0	0	81	47	1638	37	1	483	53.7	5.59	39392	1824.29	47	22	11	1.022e+10	1.03629e+10	9.20032e+09	1.32289e+10	1.28908e+10	1.21307e+10	1.08877e+10	1.045e+10	1.04635e+10
High	High	Master Protein	P26640	Valine--tRNA ligase OS=Homo sapiens GN=VARS PE=1 SV=4	0	0	57	63	1589	63	1	1264	140.4	7.59	38321	1812.57	62	41	0	3.33601e+09	3.43276e+09	3.4364e+09	4.46407e+09	4.48964e+09	4.6208e+09	4.49657e+09	4.31791e+09	4.3217e+09	Acetyl [N-Term]
High	High	Master Protein	Q6P2Q9	Pre-mRNA-processing-splicing factor 8 OS=Homo sapiens GN=PRPF8 PE=1 SV=2	0	0	56	111	1615	111	1	2335	273.4	8.84	35484	1789.49	110	53	0	1.95331e+09	2.07136e+09	1.98129e+09	2.52456e+09	2.63188e+09	2.49811e+09	2.26713e+09	2.27771e+09	2.18789e+09	Acetyl [N-Term]
High	High	Master Protein	P13667	Protein disulfide-isomerase A4 OS=Homo sapiens GN=PDIA4 PE=1 SV=2	0	0	63	48	1414	47	1	645	72.9	5.07	34417	1774.12	48	29	1	3.83469e+09	4.00204e+09	3.95294e+09	4.82438e+09	4.78e+09	4.88122e+09	4.4372e+09	4.38997e+09	4.20865e+09
High	High	Master Protein	P35221	Catenin alpha-1 OS=Homo sapiens GN=CTNNA1 PE=1 SV=1	0	0	69	49	1226	37	1	906	100	6.29	30307	1764.47	49	35	13	2.09819e+09	2.1677e+09	2.1056e+09	2.92369e+09	3.09236e+09	3.03652e+09	1.58108e+09	1.67032e+09	1551092365	Acetyl [N-Term]
High	High	Master Protein	P46940	Ras GTPase-activating-like protein IQGAP1 OS=Homo sapiens GN=IQGAP1 PE=1 SV=1	0	0	66	90	1408	85	1	1657	189.1	6.48	33451	1754.92	87	55	5	1.08432e+09	1.11681e+09	1.0927e+09	1.46781e+09	1.48713e+09	1.45963e+09	1.24255e+09	1.20049e+09	1.19047e+09	Acetyl [N-Term]
High	High	Master Protein	Q8WUY3	Protein prune homolog 2 OS=Homo sapiens GN=PRUNE2 PE=1 SV=3	0	0	53	99	1248	97	1	3088	340.4	4.45	28658	1754.57	97	70	2	4.72491e+08	4.80998e+08	4.58619e+08	6.80982e+08	6.72043e+08	6.60798e+08	5.96447e+08	6.06247e+08	6.04941e+08	Acetyl [N-Term]
High	High	Master Protein	Q5JRA6	Melanoma inhibitory activity protein 3 OS=Homo sapiens GN=MIA3 PE=1 SV=1	0	0	60	103	1407	103	1	1907	213.6	4.84	32105	1740.67	102	54	0	9.79608e+08	9.77974e+08	9.04971e+08	1.25471e+09	1.29141e+09	1.26636e+09	1.19551e+09	1.14897e+09	1.35317e+09
High	High	Master Protein	P50395	Rab GDP dissociation inhibitor beta OS=Homo sapiens GN=GDI2 PE=1 SV=2	0	0	79	36	1354	25	1	445	50.6	6.47	32807	1739.36	36	25	13	4.21881e+09	4.71942e+09	4.49661e+09	5.64547e+09	5.71138e+09	5.71508e+09	5.37393e+09	5.40758e+09	5.43888e+09
High	High	Master Protein	Q7Z406	Myosin-14 OS=Homo sapiens GN=MYH14 PE=1 SV=2	0	0	55	111	1477	96	1	1995	227.7	5.6	36729	1739.04	111	59	2	1.54702e+09	1.63463e+09	1.80788e+09	1.76783e+09	1.99174e+09	2.07358e+09	1.52888e+09	1.648e+09	1.65563e+09	Acetyl [N-Term]
High	High	Master Protein	Q13200	26S proteasome non-ATPase regulatory subunit 2 OS=Homo sapiens GN=PSMD2 PE=1 SV=3	0	0	61	51	1395	51	1	908	100.1	5.2	29829	1722.56	51	25	0	2.7106e+09	2.87824e+09	2.5915e+09	3.75776e+09	3.67195e+09	3.74964e+09	3.38374e+09	3.26243e+09	3.10131e+09	Acetyl [N-Term]
High	High	Master Protein	Q15233	Non-POU domain-containing octamer-binding protein OS=Homo sapiens GN=NONO PE=1 SV=4	0	0	60	33	1625	29	1	471	54.2	8.95	40337	1720.62	32	14	2	3.93819e+09	3.70911e+09	3.79167e+09	4.46664e+09	4.55795e+09	4.64727e+09	4.06332e+09	3.94834e+09	4.00899e+09
High	High	Master Protein	P12814	Alpha-actinin-1 OS=Homo sapiens GN=ACTN1 PE=1 SV=2	0	0	72	55	1367	34	1	892	103	5.41	31091	1705.83	55	40	2	9.27868e+08	9.87192e+08	9.06057e+08	1.08989e+09	1.18873e+09	1.17536e+09	1105904334	1.10656e+09	1.04292e+09	Acetyl [N-Term]
High	High	Master Protein	P53618	Coatomer subunit beta OS=Homo sapiens GN=COPB1 PE=1 SV=3	0	0	64	58	1273	58	1	953	107.1	6.05	28644	1692.32	58	39	0	1.52022e+09	1.57887e+09	1.51351e+09	1.89923e+09	2.0215e+09	1.95741e+09	1.65945e+09	1.71292e+09	1.60902e+09	Acetyl [N-Term]
High	High	Master Protein	P67809	Nuclease-sensitive element-binding protein 1 OS=Homo sapiens GN=YBX1 PE=1 SV=3	0	0	76	29	1538	23	1	324	35.9	9.88	47412	1678.89	29	16	5	3.65932e+09	3.54007e+09	3.26841e+09	4.1988e+09	4.15e+09	4.38559e+09	4.00017e+09	3.98529e+09	4.10626e+09	Acetyl [N-Term]
High	High	Master Protein	P50990	T-complex protein 1 subunit theta OS=Homo sapiens GN=CCT8 PE=1 SV=4	0	0	80	43	1474	43	1	548	59.6	5.6	37492	1659.38	43	30	0	5.76031e+09	6.08517e+09	6.03712e+09	7.53584e+09	7.70189e+09	7.79487e+09	6.69494e+09	6.80835e+09	6.66654e+09
High	High	Master Protein	P18206	Vinculin OS=Homo sapiens GN=VCL PE=1 SV=4	0	0	71	80	1533	80	1	1134	123.7	5.66	35064	1657.75	80	39	0	2.61801e+09	2.59799e+09	2.58527e+09	3.35024e+09	3386243651	3.31108e+09	3.21368e+09	3.25269e+09	3.01134e+09
High	High	Master Protein	P06744	Glucose-6-phosphate isomerase OS=Homo sapiens GN=GPI PE=1 SV=4	0	0	63	34	1377	34	1	558	63.1	8.32	31736	1655.6	32	19	0	7.72322e+09	8.38119e+09	7.72912e+09	1.00731e+10	1.07828e+10	1.04883e+10	9.63019e+09	1.00015e+10	9.48381e+09	Acetyl [N-Term]
High	High	Master Protein	P53396	ATP-citrate synthase OS=Homo sapiens GN=ACLY PE=1 SV=3	0	0	71	72	1576	72	1	1101	120.8	7.33	37192	1648.08	71	42	0	4.35217e+09	4.64591e+09	4.1716e+09	5.67371e+09	5.87914e+09	5.66181e+09	5.16793e+09	5.16806e+09	5.1168e+09
High	High	Master Protein	Q04637	Eukaryotic translation initiation factor 4 gamma 1 OS=Homo sapiens GN=EIF4G1 PE=1 SV=4	0	0	55	85	1774	79	1	1599	175.4	5.33	41244	1647.44	84	42	10	4.42082e+09	4.6112e+09	4.51207e+09	5.99775e+09	6.03364e+09	5.98775e+09	5.56847e+09	5.68342e+09	5.60499e+09
High	High	Master Protein	P17858	ATP-dependent 6-phosphofructokinase, liver type OS=Homo sapiens GN=PFKL PE=1 SV=6	0	0	53	34	1039	30	1	780	85	7.5	24744	1647.38	34	21	0	1.0638e+09	1.10412e+09	1.10584e+09	1.41184e+09	1.50996e+09	1.45322e+09	1.25848e+09	1.24344e+09	1.16907e+09
High	High	Master Protein	P31943	Heterogeneous nuclear ribonucleoprotein H OS=Homo sapiens GN=HNRNPH1 PE=1 SV=4	0	0	59	23	1234	13	1	449	49.2	6.3	33345	1642.29	23	14	12	3.64114e+09	3.86913e+09	3.34184e+09	4.23559e+09	4.45016e+09	4.23292e+09	3.67336e+09	3.87947e+09	3.75798e+09	Acetyl [N-Term; N-Term]
High	High	Master Protein	Q15366	Poly(rC)-binding protein 2 OS=Homo sapiens GN=PCBP2 PE=1 SV=1	0	0	85	20	1214	12	1	365	38.6	6.79	30292	1637.3	20	10	12	4.05538e+09	4.52645e+09	4.33711e+09	5.19636e+09	5.26977e+09	5.20932e+09	4.54374e+09	4.49732e+09	4.1988e+09
High	High	Master Protein	P27797	Calreticulin OS=Homo sapiens GN=CALR PE=1 SV=1	0	0	75	35	1558	35	1	417	48.1	4.44	32350	1636.46	34	20	0	8.15129e+09	8.17938e+09	8.18121e+09	9.03079e+09	9.57724e+09	9.43166e+09	8.07585e+09	8.37362e+09	7.88707e+09
High	High	Master Protein	P20700	Lamin-B1 OS=Homo sapiens GN=LMNB1 PE=1 SV=2	0	0	74	53	1447	49	1	586	66.4	5.16	36426	1634.85	53	32	3	5.01098e+09	5.10417e+09	4.81148e+09	5.98365e+09	5.97529e+09	5.87724e+09	5.15759e+09	4.92152e+09	4.94874e+09	Acetyl [N-Term]
High	High	Master Protein	Q15393	Splicing factor 3B subunit 3 OS=Homo sapiens GN=SF3B3 PE=1 SV=4	0	0	51	49	1230	49	1	1217	135.5	5.26	30249	1607.62	49	27	0	2.37472e+09	2.3588e+09	2.35745e+09	2.77151e+09	2.76795e+09	2.70491e+09	2.46604e+09	2.59587e+09	2.58632e+09
High	High	Master Protein	O00410	Importin-5 OS=Homo sapiens GN=IPO5 PE=1 SV=4	0	0	77	57	1319	53	1	1097	123.6	4.94	30341	1606.3	57	33	6	1.65547e+09	1.72797e+09	1.64437e+09	1.95936e+09	1.99977e+09	1.96339e+09	1.81734e+09	1.87004e+09	1.78436e+09	Acetyl [N-Term]
High	High	Master Protein	P49748	Very long-chain specific acyl-CoA dehydrogenase, mitochondrial OS=Homo sapiens GN=ACADVL PE=1 SV=1	0	0	71	41	1148	41	1	655	70.3	8.75	27952	1580.59	41	25	0	1.98785e+09	2.14547e+09	2.05013e+09	2.89883e+09	3.05631e+09	2.96993e+09	2.608e+09	2.62541e+09	2.49411e+09
High	High	Master Protein	Q9Y4L1	Hypoxia up-regulated protein 1 OS=Homo sapiens GN=HYOU1 PE=1 SV=1	0	0	60	52	1257	51	1	999	111.3	5.22	31303	1579.29	50	31	1	2.10544e+09	2.14628e+09	2.17121e+09	2.94748e+09	2.92277e+09	2.90224e+09	2.56547e+09	2.64385e+09	2.54724e+09
High	High	Master Protein	Q08378	Golgin subfamily A member 3 OS=Homo sapiens GN=GOLGA3 PE=1 SV=2	0	0	68	88	1143	88	1	1498	167.3	5.44	27307	1571.72	88	55	0	6.19507e+08	6.20463e+08	5.78893e+08	8.36799e+08	8.76327e+08	8.58528e+08	8.20445e+08	8.24407e+08	8.2593e+08	Acetyl [N-Term]
High	High	Master Protein	P0DMV9	Heat shock 70 kDa protein 1B OS=Homo sapiens GN=HSPA1B PE=1 SV=1	0	0	62	35	1294	22	1	641	70	5.66	30586	1565.87	34	20	12	5.30453e+09	5.04404e+09	4.9264e+09	6.67653e+09	7.24664e+09	7.23958e+09	6.37752e+09	6.41636e+09	6.39589e+09
High	High	Master Protein	P42704	Leucine-rich PPR motif-containing protein, mitochondrial OS=Homo sapiens GN=LRPPRC PE=1 SV=3	0	0	66	82	1435	81	1	1394	157.8	6.13	34805	1563.6	81	41	1	2.23989e+09	2.32791e+09	2.07208e+09	2.85256e+09	2.87247e+09	2.821e+09	2.91714e+09	2.84478e+09	2.65219e+09
High	High	Master Protein	P31939	Bifunctional purine biosynthesis protein PURH OS=Homo sapiens GN=ATIC PE=1 SV=3	0	0	85	41	1123	41	1	592	64.6	6.71	24477	1554.91	40	23	0	2.31665e+09	2.30171e+09	2.24442e+09	3.11914e+09	3.1425e+09	3.0534e+09	3.14777e+09	3.01115e+09	2.93001e+09	Acetyl [N-Term]
High	High	Master Protein	Q92598	Heat shock protein 105 kDa OS=Homo sapiens GN=HSPH1 PE=1 SV=1	0	0	77	57	1254	53	1	858	96.8	5.39	27934	1554.47	57	38	2	1.92317e+09	1.8277e+09	1.80809e+09	2.34345e+09	2.49608e+09	2.45128e+09	2.15384e+09	2.24258e+09	2.1583e+09	Acetyl [N-Term]
High	High	Master Protein	Q9UQ35	Serine/arginine repetitive matrix protein 2 OS=Homo sapiens GN=SRRM2 PE=1 SV=2	0	0	34	71	1187	71	1	2752	299.4	12.06	27775	1550.34	70	37	0	9.367e+08	1.0091e+09	9.44107e+08	1.25163e+09	1.30142e+09	1.2604e+09	1.15103e+09	1.1894e+09	1.18996e+09	Acetyl [N-Term]
High	High	Master Protein	P11586	C-1-tetrahydrofolate synthase, cytoplasmic OS=Homo sapiens GN=MTHFD1 PE=1 SV=3	0	0	73	58	1260	57	1	935	101.5	7.3	26705	1548.53	58	35	1	4.32912e+09	4.49743e+09	4.10227e+09	4.72898e+09	4.84473e+09	4.79107e+09	4.40231e+09	4.2328e+09	4.29656e+09	Acetyl [N-Term]
High	High	Master Protein	Q02790	Peptidyl-prolyl cis-trans isomerase FKBP4 OS=Homo sapiens GN=FKBP4 PE=1 SV=3	0	0	81	41	1457	41	1	459	51.8	5.43	31469	1547.27	41	22	0	7.18604e+09	7.34256e+09	7.1275e+09	9.60299e+09	1.00619e+10	9.68869e+09	9.24529e+09	9.08249e+09	9.09312e+09	Acetyl [N-Term]
High	High	Master Protein	P05198	Eukaryotic translation initiation factor 2 subunit 1 OS=Homo sapiens GN=EIF2S1 PE=1 SV=3	0	0	71	28	1097	28	1	315	36.1	5.08	28344	1547.12	28	16	0	1.60984e+09	1.55847e+09	1.48867e+09	1.99786e+09	1.95044e+09	1.99112e+09	1.95132e+09	1.90878e+09	1.89376e+09
High	High	Master Protein	Q14203	Dynactin subunit 1 OS=Homo sapiens GN=DCTN1 PE=1 SV=3	0	0	61	71	1149	71	1	1278	141.6	5.81	27657	1544.16	70	42	0	9.33978e+08	9.73132e+08	8.93579e+08	1.17155e+09	1.19749e+09	1.19518e+09	1.10223e+09	1.07598e+09	1.06356e+09
High	High	Master Protein	Q12955	Ankyrin-3 OS=Homo sapiens GN=ANK3 PE=1 SV=3	0	0	29	99	1274	85	1	4377	480.1	6.49	30295	1538.06	96	51	17	9.20268e+08	9.46879e+08	8.88374e+08	1.34416e+09	1.35203e+09	1.35311e+09	1.08271e+09	1.04308e+09	1.03084e+09
High	High	Master Protein	Q15029	116 kDa U5 small nuclear ribonucleoprotein component OS=Homo sapiens GN=EFTUD2 PE=1 SV=1	0	0	70	56	1135	55	1	972	109.4	5	26173	1536.06	56	36	0	1.28204e+09	1.25304e+09	1.2084e+09	1679960201	1.72619e+09	1.73436e+09	1.57237e+09	1.55239e+09	1.48729e+09
High	High	Master Protein	O75083	WD repeat-containing protein 1 OS=Homo sapiens GN=WDR1 PE=1 SV=4	0	0	62	24	959	24	1	606	66.2	6.65	23166	1530.39	24	13	0	1.29656e+09	1.38038e+09	1.33684e+09	1.70207e+09	1.6837e+09	1.67246e+09	1.61098e+09	1.60916e+09	1.65208e+09
High	High	Master Protein	Q13435	Splicing factor 3B subunit 2 OS=Homo sapiens GN=SF3B2 PE=1 SV=2	0	0	60	58	1209	58	1	895	100.2	5.67	28883	1526.46	57	27	0	1.64244e+09	1.65492e+09	1.5886e+09	2.15998e+09	2.16113e+09	2.18999e+09	1.81907e+09	1.87495e+09	1.81314e+09	Acetyl [N-Term]
High	High	Master Protein	P49736	DNA replication licensing factor MCM2 OS=Homo sapiens GN=MCM2 PE=1 SV=4	0	0	62	51	1205	51	1	904	101.8	5.52	29060	1524.01	51	31	0	1.30688e+09	1.30863e+09	1.27053e+09	1.52696e+09	1.47327e+09	1.46147e+09	9.30857e+08	9.93858e+08	9.12265e+08	Acetyl [N-Term]
High	High	Master Protein	P53621	Coatomer subunit alpha OS=Homo sapiens GN=COPA PE=1 SV=2	0	0	68	76	1311	76	1	1224	138.3	7.66	28453	1520.52	75	41	0	2.55567e+09	2.65728e+09	2.50742e+09	3.32395e+09	3.31183e+09	3.26575e+09	2.98594e+09	2.88392e+09	2.87175e+09
High	High	Master Protein	P31150	Rab GDP dissociation inhibitor alpha OS=Homo sapiens GN=GDI1 PE=1 SV=2	0	0	79	32	972	21	1	447	50.6	5.14	22125	1517.99	32	22	0	7.0619e+08	7.25107e+08	7.08401e+08	9.12909e+08	9.30294e+08	9.38513e+08	9.37726e+08	9.12758e+08	9.6466e+08
High	High	Master Protein	Q7KZF4	Staphylococcal nuclease domain-containing protein 1 OS=Homo sapiens GN=SND1 PE=1 SV=1	0	0	75	64	1584	64	1	910	101.9	7.17	39400	1516.49	63	39	0	5.12872e+09	5.20023e+09	5.18472e+09	6.63863e+09	6.7022e+09	6.79457e+09	6.11166e+09	6.0711e+09	5.93929e+09	Acetyl [N-Term]
High	High	Master Protein	Q9Y678	Coatomer subunit gamma-1 OS=Homo sapiens GN=COPG1 PE=1 SV=1	0	0	78	54	1118	50	1	874	97.7	5.47	25311	1512.82	54	32	4	1.44035e+09	1.49798e+09	1.36305e+09	1.83605e+09	1.78026e+09	1.77077e+09	1.61843e+09	1.55319e+09	1.60138e+09
High	High	Master Protein	P23246	Splicing factor, proline- and glutamine-rich OS=Homo sapiens GN=SFPQ PE=1 SV=2	0	0	53	40	1473	38	1	707	76.1	9.44	30047	1509.21	39	19	2	5.26729e+09	5.73339e+09	5.33735e+09	6.14691e+09	6.33461e+09	6.48042e+09	5.64171e+09	5.7331e+09	5.70137e+09
High	High	Master Protein	P40227	T-complex protein 1 subunit zeta OS=Homo sapiens GN=CCT6A PE=1 SV=3	0	0	59	26	955	21	1	531	58	6.68	19100	1506.62	24	15	6	2.60434e+09	2.71474e+09	2.5831e+09	3.04508e+09	3.28538e+09	2.98972e+09	3.12955e+09	2.87357e+09	3.06762e+09
High	High	Master Protein	P07237	Protein disulfide-isomerase OS=Homo sapiens GN=P4HB PE=1 SV=3	0	0	71	38	1347	38	1	508	57.1	4.87	33530	1505.97	38	22	0	9.04379e+09	9.38102e+09	8.48912e+09	1.12016e+10	1.15749e+10	1.12568e+10	1.07699e+10	1.0128e+10	1.00561e+10
High	High	Master Protein	P49321	Nuclear autoantigenic sperm protein OS=Homo sapiens GN=NASP PE=1 SV=2	0	0	85	58	1317	58	1	788	85.2	4.3	34073	1484.83	57	30	0	1.45993e+09	1.53604e+09	1.38251e+09	1.56336e+09	1.58931e+09	1.55672e+09	1.2017e+09	1.20547e+09	1.15123e+09	Acetyl [N-Term]
High	High	Master Protein	P14866	Heterogeneous nuclear ribonucleoprotein L OS=Homo sapiens GN=HNRNPL PE=1 SV=2	0	0	74	29	1156	28	1	589	64.1	8.22	28432	1478.06	28	18	1	3.35889e+09	3.16094e+09	3.01909e+09	4.01335e+09	4.32985e+09	4.01901e+09	3.34456e+09	3.34388e+09	3.27523e+09
High	High	Master Protein	P51991	Heterogeneous nuclear ribonucleoprotein A3 OS=Homo sapiens GN=HNRNPA3 PE=1 SV=2	0	0	65	31	1056	28	1	378	39.6	9.01	29474	1457.87	31	19	2	3.71241e+09	3.6737e+09	3.77287e+09	4.27163e+09	4.34629e+09	4.8642e+09	4.17947e+09	4.28352e+09	4.41833e+09	Acetyl [N-Term]
High	High	Master Protein	Q14157	Ubiquitin-associated protein 2-like OS=Homo sapiens GN=UBAP2L PE=1 SV=2	0	0	50	39	1027	39	1	1087	114.5	7.11	23337	1452.73	37	25	0	1.29074e+09	1.27211e+09	1.28134e+09	1.64071e+09	1.69406e+09	1.59536e+09	1.43959e+09	1.46331e+09	1.42397e+09	Acetyl [N-Term]
High	High	Master Protein	P14923	Junction plakoglobin OS=Homo sapiens GN=JUP PE=1 SV=3	0	0	71	41	1171	35	1	745	81.7	6.14	31438	1436.25	41	23	7	1.5506e+09	1.48696e+09	1.44419e+09	1.99412e+09	2.11058e+09	1.98452e+09	1.70931e+09	1.69961e+09	1.62071e+09	Acetyl [N-Term]
High	High	Master Protein	P54578	Ubiquitin carboxyl-terminal hydrolase 14 OS=Homo sapiens GN=USP14 PE=1 SV=3	0	0	74	34	1129	34	1	494	56	5.3	25466	1435.75	34	23	0	1.8966e+09	1.99793e+09	1.87333e+09	2.35208e+09	2.50044e+09	2.42349e+09	2.42038e+09	2.40005e+09	2.35146e+09
High	High	Master Protein	P51858	Hepatoma-derived growth factor OS=Homo sapiens GN=HDGF PE=1 SV=1	0	0	83	26	1135	25	1	240	26.8	4.73	28028	1417.44	25	14	0	1.99791e+09	2.10869e+09	2.10123e+09	2.26295e+09	2.42385e+09	2.46482e+09	2.38249e+09	2.28441e+09	2.45881e+09
High	High	Master Protein	Q14697	Neutral alpha-glucosidase AB OS=Homo sapiens GN=GANAB PE=1 SV=3	0	0	64	54	1333	54	1	944	106.8	6.14	28866	1405.03	53	30	0	2.85013e+09	2.89441e+09	2.82997e+09	3.43752e+09	3.65194e+09	3.50017e+09	3.11062e+09	3.17476e+09	2.97891e+09
High	High	Master Protein	Q5T4S7	E3 ubiquitin-protein ligase UBR4 OS=Homo sapiens GN=UBR4 PE=1 SV=1	0	0	38	159	1411	159	1	5183	573.5	6.04	33905	1402.87	157	68	0	5.57431e+08	5.90551e+08	5.7917e+08	7.87679e+08	7.93247e+08	7.86062e+08	7.31575e+08	7.31392e+08	7.01491e+08
High	High	Master Protein	P23921	Ribonucleoside-diphosphate reductase large subunit OS=Homo sapiens GN=RRM1 PE=1 SV=1	0	0	71	45	970	45	1	792	90	7.15	19600	1393.83	45	31	0	1.99861e+09	2.15524e+09	2.09122e+09	2.43836e+09	2.56716e+09	2.47596e+09	2.24845e+09	2.36619e+09	2.24771e+09
High	High	Master Protein	Q8WUM4	Programmed cell death 6-interacting protein OS=Homo sapiens GN=PDCD6IP PE=1 SV=1	0	0	63	56	1066	56	1	868	96	6.52	26748	1390.29	55	20	0	2.09783e+09	2.05956e+09	1.92779e+09	2.64488e+09	2.67836e+09	2.69393e+09	2.61059e+09	2.57522e+09	2.56935e+09	Acetyl [N-Term]
High	High	Master Protein	O75533	Splicing factor 3B subunit 1 OS=Homo sapiens GN=SF3B1 PE=1 SV=3	0	0	60	66	1216	66	1	1304	145.7	7.09	27631	1379.22	66	36	0	1.28299e+09	1.37576e+09	1.33631e+09	1.70849e+09	1.69381e+09	1.65556e+09	1.38355e+09	1.42789e+09	1.43281e+09
High	High	Master Protein	P56192	Methionine--tRNA ligase, cytoplasmic OS=Homo sapiens GN=MARS PE=1 SV=2	0	0	55	45	1008	45	1	900	101.1	6.16	23684	1378.92	44	33	0	1.91154e+09	1.91483e+09	1.90895e+09	2.90278e+09	2.95341e+09	2.88947e+09	2.6814e+09	2.66898e+09	2.68354e+09
High	High	Master Protein	P12956	X-ray repair cross-complementing protein 6 OS=Homo sapiens GN=XRCC6 PE=1 SV=2	0	0	60	45	1293	45	1	609	69.8	6.64	29481	1378.77	45	25	0	6.36602e+09	6.58299e+09	6.43837e+09	7.34859e+09	7.49508e+09	7.26486e+09	6.25346e+09	6.77887e+09	6.18565e+09	Acetyl [N-Term]
High	High	Master Protein	Q86UP2	Kinectin OS=Homo sapiens GN=KTN1 PE=1 SV=1	0	0	64	95	1332	94	1	1357	156.2	5.64	29863	1378.66	94	52	1	1.40388e+09	1.49486e+09	1.40292e+09	1.88868e+09	1.87784e+09	1.90751e+09	1.77681e+09	1.81395e+09	1.78434e+09
High	High	Master Protein	Q32MZ4	Leucine-rich repeat flightless-interacting protein 1 OS=Homo sapiens GN=LRRFIP1 PE=1 SV=2	0	0	65	50	1043	49	1	808	89.2	4.65	27315	1375.3	49	30	2	1.04612e+09	9.94288e+08	9.68225e+08	1.29201e+09	1.37642e+09	1.33817e+09	7.3379e+08	7.12587e+08	6.89921e+08	Acetyl [N-Term]
High	High	Master Protein	O14980	Exportin-1 OS=Homo sapiens GN=XPO1 PE=1 SV=1	0	0	55	52	1205	52	1	1071	123.3	6.06	26747	1372.91	51	26	0	1726080945	1.73408e+09	1.70581e+09	1.89812e+09	1.9231e+09	1.92186e+09	1.73218e+09	1.68602e+09	1.66658e+09
High	High	Master Protein	P30086	Phosphatidylethanolamine-binding protein 1 OS=Homo sapiens GN=PEBP1 PE=1 SV=3	0	0	82	14	850	14	1	187	21	7.53	20760	1361.88	14	9	0	7.02705e+09	7.26053e+09	6.88598e+09	8.45544e+09	8.88907e+09	8.28212e+09	8.04889e+09	8.24897e+09	7.7475e+09
High	High	Master Protein	Q99714	3-hydroxyacyl-CoA dehydrogenase type-2 OS=Homo sapiens GN=HSD17B10 PE=1 SV=3	0	0	80	16	756	16	1	261	26.9	7.78	19261	1354.19	16	12	0	7.76584e+08	8.08526e+08	7.90834e+08	1.22706e+09	1.17264e+09	1.16166e+09	1.01342e+09	9.85214e+08	9.48728e+08
High	High	Master Protein	Q00341	Vigilin OS=Homo sapiens GN=HDLBP PE=1 SV=2	0	0	60	71	1213	70	1	1268	141.4	6.87	27148	1353.22	70	34	1	1.96674e+09	1.93405e+09	1.8942e+09	2.59211e+09	2.64395e+09	2.64265e+09	2.35699e+09	2.32565e+09	2.27093e+09	Acetyl [N-Term]
High	High	Master Protein	Q12905	Interleukin enhancer-binding factor 2 OS=Homo sapiens GN=ILF2 PE=1 SV=2	0	0	82	25	1141	25	1	390	43	5.26	23544	1352	25	19	0	2.38932e+09	2.48226e+09	2.45049e+09	3.17033e+09	2.95554e+09	2.98363e+09	2.86461e+09	2.93306e+09	2.70541e+09
High	High	Master Protein	Q07157	Tight junction protein ZO-1 OS=Homo sapiens GN=TJP1 PE=1 SV=3	0	0	71	100	1294	99	1	1748	195.3	6.7	28780	1345.9	99	52	1	1.30277e+09	1.3489e+09	1.26378e+09	1.50457e+09	1.53447e+09	1.55069e+09	1.47802e+09	1.48743e+09	1.45264e+09
High	High	Master Protein	P06454	Prothymosin alpha OS=Homo sapiens GN=PTMA PE=1 SV=2	0	0	39	8	1418	8	1	111	12.2	3.78	48005	1342.7	8	6	0	6.25136e+09	5.97242e+09	6.59374e+09	7.11944e+09	7.27437e+09	6.98841e+09	5.84305e+09	5.73267e+09	6.29233e+09	Acetyl [N-Term]
High	High	Master Protein	Q86VP6	Cullin-associated NEDD8-dissociated protein 1 OS=Homo sapiens GN=CAND1 PE=1 SV=2	0	0	58	64	1341	61	1	1230	136.3	5.78	31110	1328.77	64	33	4	3.13647e+09	3.15666e+09	3.11806e+09	3.93311e+09	4.13717e+09	3.99775e+09	3.88477e+09	3.92191e+09	4.00605e+09	Acetyl [N-Term]
High	High	Master Protein	Q06210	Glutamine--fructose-6-phosphate aminotransferase [isomerizing] 1 OS=Homo sapiens GN=GFPT1 PE=1 SV=3	0	0	68	45	1012	45	1	699	78.8	7.11	22293	1322.47	45	29	0	1.31863e+09	1.43394e+09	1.37227e+09	1.90798e+09	1.95643e+09	1.93227e+09	1.49558e+09	1.48476e+09	1.47587e+09
High	High	Master Protein	P33991	DNA replication licensing factor MCM4 OS=Homo sapiens GN=MCM4 PE=1 SV=5	0	0	67	51	1024	50	1	863	96.5	6.74	21902	1322.45	50	30	1	1.43037e+09	1.38397e+09	1.40944e+09	1.52338e+09	1.59044e+09	1.53317e+09	1.02542e+09	1.08509e+09	1.02231e+09	Acetyl [N-Term]
High	High	Master Protein	P35606	Coatomer subunit beta' OS=Homo sapiens GN=COPB2 PE=1 SV=2	0	0	62	45	1062	45	1	906	102.4	5.27	23387	1322.02	45	30	0	1.54754e+09	1.59269e+09	1.54309e+09	1.86228e+09	1.92146e+09	1.94608e+09	1.6997e+09	1.68327e+09	1.67932e+09
High	High	Master Protein	P00390	Glutathione reductase, mitochondrial OS=Homo sapiens GN=GSR PE=1 SV=2	0	0	74	29	869	29	1	522	56.2	8.5	19929	1321.58	29	15	0	1.89859e+09	1.75591e+09	1.80121e+09	2.49608e+09	2.43416e+09	2.44553e+09	2.29846e+09	2.23599e+09	2.17595e+09
High	High	Master Protein	P61978	Heterogeneous nuclear ribonucleoprotein K OS=Homo sapiens GN=HNRNPK PE=1 SV=1	0	0	69	34	1548	34	1	463	50.9	5.54	34700	1318.86	34	20	0	1.03433e+10	1.09963e+10	1.16987e+10	1.33059e+10	1.30938e+10	1.26199e+10	1.15545e+10	1.20363e+10	1.22321e+10	Acetyl [N-Term]
High	High	Master Protein	P18754	Regulator of chromosome condensation OS=Homo sapiens GN=RCC1 PE=1 SV=1	0	0	69	22	771	22	1	421	44.9	7.52	21290	1314.76	22	17	0	6.68959e+08	6.95982e+08	6.5573e+08	7.37537e+08	7.29432e+08	7.27849e+08	6.35525e+08	6.16607e+08	6.01813e+08
High	High	Master Protein	P43686	26S protease regulatory subunit 6B OS=Homo sapiens GN=PSMC4 PE=1 SV=2	0	0	75	34	822	33	1	418	47.3	5.21	17008	1314.75	33	18	1	1.5782e+09	1.37646e+09	1.34103e+09	1.75007e+09	1.79462e+09	1.78697e+09	1.50726e+09	1.64123e+09	1.55358e+09	Acetyl [N-Term]
High	High	Master Protein	Q9Y520	Protein PRRC2C OS=Homo sapiens GN=PRRC2C PE=1 SV=4	0	0	43	104	1175	100	1	2896	316.7	9.13	26128	1313.31	103	48	4	8.76329e+08	8.31063e+08	8.39815e+08	1.01825e+09	1.0548e+09	1.06353e+09	9.05078e+08	8.93882e+08	8.86763e+08
High	High	Master Protein	O60664	Perilipin-3 OS=Homo sapiens GN=PLIN3 PE=1 SV=3	0	0	68	21	798	21	1	434	47	5.44	22226	1311.4	21	15	0	9.2471e+08	1.01417e+09	9.56029e+08	1.20619e+09	1.26243e+09	1.21244e+09	1.12786e+09	1.15147e+09	1.11152e+09
High	High	Master Protein	P40926	Malate dehydrogenase, mitochondrial OS=Homo sapiens GN=MDH2 PE=1 SV=3	0	0	66	20	1062	20	1	338	35.5	8.68	27486	1311.34	20	11	0	6.46609e+09	6.57472e+09	6.08009e+09	8.84474e+09	8.84249e+09	8.60662e+09	8.11364e+09	8.10455e+09	7.96019e+09
High	High	Master Protein	P25205	DNA replication licensing factor MCM3 OS=Homo sapiens GN=MCM3 PE=1 SV=3	0	0	67	55	1099	55	1	808	90.9	5.77	24577	1305.31	55	29	0	1.85569e+09	1.72996e+09	1.70456e+09	1.95735e+09	2.03293e+09	1.98494e+09	1.36026e+09	1.32076e+09	1.28857e+09	Acetyl [N-Term]
High	High	Master Protein	Q14008	Cytoskeleton-associated protein 5 OS=Homo sapiens GN=CKAP5 PE=1 SV=3	0	0	57	108	1289	108	1	2032	225.4	7.8	30076	1298.18	108	55	0	1.22004e+09	1.2289e+09	1.19703e+09	1.5437e+09	1.56537e+09	1.5708e+09	1.31369e+09	1.33378e+09	1.29776e+09	Acetyl [N-Term]
High	High	Master Protein	P26639	Threonine--tRNA ligase, cytoplasmic OS=Homo sapiens GN=TARS PE=1 SV=3	0	0	72	51	1181	48	1	723	83.4	6.67	25412	1297.5	51	29	3	2.99086e+09	3.18991e+09	3.04401e+09	4.45189e+09	4.45579e+09	4.44168e+09	4.54975e+09	4.4845e+09	4.3676e+09
High	High	Master Protein	P36776	Lon protease homolog, mitochondrial OS=Homo sapiens GN=LONP1 PE=1 SV=2	0	0	51	42	935	42	1	959	106.4	6.39	20949	1294.36	42	25	0	1.01539e+09	9.86811e+08	9.5773e+08	1.34238e+09	1.33435e+09	1.35333e+09	1.19962e+09	1.20876e+09	1.18164e+09
High	High	Master Protein	Q9Y285	Phenylalanine--tRNA ligase alpha subunit OS=Homo sapiens GN=FARSA PE=1 SV=3	0	0	62	28	923	28	1	508	57.5	7.8	23478	1288.16	28	19	0	1.21463e+09	1.20917e+09	1.10997e+09	1.54494e+09	1.55894e+09	1.57607e+09	1.51539e+09	1.49693e+09	1.44445e+09	Acetyl [N-Term]
High	High	Master Protein	Q9NSD9	Phenylalanine--tRNA ligase beta subunit OS=Homo sapiens GN=FARSB PE=1 SV=3	0	0	65	38	918	38	1	589	66.1	6.84	19668	1284.92	37	21	0	1.76979e+09	1.76916e+09	1.722e+09	2.18839e+09	2.26825e+09	2.20535e+09	2.0798e+09	2.17683e+09	2.04477e+09
High	High	Master Protein	P23588	Eukaryotic translation initiation factor 4B OS=Homo sapiens GN=EIF4B PE=1 SV=2	0	0	65	47	1094	47	1	611	69.1	5.73	26948	1280.22	46	18	0	1.58335e+09	1.67126e+09	1.54212e+09	2.35777e+09	2.37457e+09	2.26992e+09	2.15521e+09	2.26837e+09	2.06446e+09
High	High	Master Protein	Q14839	Chromodomain-helicase-DNA-binding protein 4 OS=Homo sapiens GN=CHD4 PE=1 SV=2	0	0	53	95	1172	71	1	1912	217.9	5.86	25037	1271.09	93	50	26	9.80594e+08	1.00289e+09	9.49974e+08	9.88838e+08	1.02988e+09	9.918e+08	8.9622e+08	8.49802e+08	8.32634e+08
High	High	Master Protein	P39023	60S ribosomal protein L3 OS=Homo sapiens GN=RPL3 PE=1 SV=2	0	0	54	28	1060	28	1	403	46.1	10.18	22857	1265.58	28	12	0	5.86093e+09	6.23862e+09	5.91964e+09	8.71095e+09	8.45117e+09	8.85759e+09	8.37731e+09	8.0591e+09	7.95582e+09
High	High	Master Protein	Q92945	Far upstream element-binding protein 2 OS=Homo sapiens GN=KHSRP PE=1 SV=4	0	0	67	42	1213	39	1	711	73.1	7.3	33910	1265.5	42	24	3	2.70441e+09	2.8123e+09	2.695e+09	3.35644e+09	3.65541e+09	3.56283e+09	2.72558e+09	2.67605e+09	2.66527e+09	Acetyl [N-Term]
High	High	Master Protein	P40939	Trifunctional enzyme subunit alpha, mitochondrial OS=Homo sapiens GN=HADHA PE=1 SV=2	0	0	64	36	990	36	1	763	82.9	9.04	22898	1263.55	36	24	0	1.54217e+09	1.62565e+09	1.64844e+09	2.20778e+09	2.24283e+09	2.2629e+09	1.96576e+09	2.07515e+09	1.98958e+09
High	High	Master Protein	P54136	Arginine--tRNA ligase, cytoplasmic OS=Homo sapiens GN=RARS PE=1 SV=2	0	0	71	46	1064	46	1	660	75.3	6.68	24095	1262.26	46	23	0	2.2438e+09	2.39257e+09	2.27383e+09	2.99601e+09	3.00858e+09	2.96059e+09	3.09975e+09	3.07792e+09	2.93061e+09	Acetyl [N-Term]
High	High	Master Protein	O14950	Myosin regulatory light chain 12B OS=Homo sapiens GN=MYL12B PE=1 SV=2	0	0	66	15	781	15	1	172	19.8	4.84	18720	1251.49	15	13	0	1.7544e+09	1.85723e+09	1.81306e+09	1.85943e+09	1.91615e+09	1.86572e+09	1.7347e+09	1.7834e+09	1.63526e+09
High	High	Master Protein Candidate	P19105	Myosin regulatory light chain 12A OS=Homo sapiens GN=MYL12A PE=1 SV=2	0	0	67	15	781	15	1	171	19.8	4.81	18720	1251.49	15	13	0	1.7544e+09	1.85723e+09	1.81306e+09	1.85943e+09	1.91615e+09	1.86572e+09	1.7347e+09	1.7834e+09	1.63526e+09
High	High	Master Protein	P12004	Proliferating cell nuclear antigen OS=Homo sapiens GN=PCNA PE=1 SV=1	0	0	72	17	790	17	1	261	28.8	4.69	16081	1250.58	17	10	0	3.019e+09	3.16251e+09	2.99457e+09	3.61425e+09	3.91839e+09	3.63567e+09	2515729787	2.49357e+09	2.3984e+09
High	High	Master Protein	P13798	Acylamino-acid-releasing enzyme OS=Homo sapiens GN=APEH PE=1 SV=4	0	0	70	32	915	32	1	732	81.2	5.48	20749	1244.96	31	22	0	1.98995e+09	1.95622e+09	1.93711e+09	2.51192e+09	2.5933e+09	2.58007e+09	2.48652e+09	2.71145e+09	2.53384e+09
High	High	Master Protein	P49368	T-complex protein 1 subunit gamma OS=Homo sapiens GN=CCT3 PE=1 SV=4	0	0	67	38	1252	38	1	545	60.5	6.49	31138	1244.5	38	23	0	5.09186e+09	5.17366e+09	4.84325e+09	6.14739e+09	6.20793e+09	6.20471e+09	5.85067e+09	5.88576e+09	5.53803e+09	Acetyl [N-Term]
High	High	Master Protein	P23396	40S ribosomal protein S3 OS=Homo sapiens GN=RPS3 PE=1 SV=2	0	0	84	25	1003	25	1	243	26.7	9.66	19865	1239.73	25	11	0	6.28702e+09	6.81554e+09	6.25644e+09	7.71945e+09	7.75438e+09	7.58081e+09	7.49532e+09	7.27205e+09	7.00964e+09	Acetyl [N-Term]
High	High	Master Protein	Q63HN8	E3 ubiquitin-protein ligase RNF213 OS=Homo sapiens GN=RNF213 PE=1 SV=3	0	0	41	177	1376	176	1	5207	591	6.48	31336	1238.81	176	77	1	6.41475e+08	6.70744e+08	6.36328e+08	8.181e+08	8.30106e+08	8.17482e+08	7.13272e+08	7.04826e+08	7.01582e+08	Acetyl [N-Term]
High	High	Master Protein	P16989	Y-box-binding protein 3 OS=Homo sapiens GN=YBX3 PE=1 SV=4	0	0	68	19	797	13	1	372	40.1	9.77	22960	1236.59	18	13	0	5.67363e+08	6.0769e+08	6.30196e+08	7.11206e+08	6.974e+08	7.13493e+08	6.87684e+08	7.12e+08	6.81934e+08	Acetyl [N-Term]
High	High	Master Protein	Q99798	Aconitate hydratase, mitochondrial OS=Homo sapiens GN=ACO2 PE=1 SV=2	0	0	70	43	860	43	1	780	85.4	7.61	19617	1234.44	43	26	0	1.18388e+09	1.23501e+09	1.16173e+09	1.524e+09	1.64872e+09	1.66368e+09	1.40634e+09	1.44843e+09	1.35997e+09
High	High	Master Protein	P27708	CAD protein OS=Homo sapiens GN=CAD PE=1 SV=3	0	0	58	90	1070	87	1	2225	242.8	6.46	23740	1232.19	87	49	2	9.90172e+08	1.0359e+09	9.75708e+08	1.15514e+09	1.15904e+09	1.16094e+09	1.02247e+09	1.01154e+09	1.00414e+09	Acetyl [N-Term]
High	High	Master Protein	P16615	Sarcoplasmic/endoplasmic reticulum calcium ATPase 2 OS=Homo sapiens GN=ATP2A2 PE=1 SV=1	0	0	51	48	1009	48	1	1042	114.7	5.34	22406	1230.04	47	26	0	1.44863e+09	1.50113e+09	1.42649e+09	1.84468e+09	1.91989e+09	1.88123e+09	1.76954e+09	1.79705e+09	1.73225e+09	Acetyl [N-Term]
High	High	Master Protein	Q07065	Cytoskeleton-associated protein 4 OS=Homo sapiens GN=CKAP4 PE=1 SV=2	0	0	64	37	890	37	1	602	66	5.92	23441	1228.65	36	24	0	1.30553e+09	1.23607e+09	1.21955e+09	1.51101e+09	1.53746e+09	1.57307e+09	1.54413e+09	1.5398e+09	1.51915e+09
High	High	Master Protein	P11940	Polyadenylate-binding protein 1 OS=Homo sapiens GN=PABPC1 PE=1 SV=2	0	0	68	40	1359	26	1	636	70.6	9.5	34737	1222.57	40	19	20	5.6106e+09	5.92028e+09	5.9202e+09	7.43632e+09	7.7581e+09	7.60284e+09	6.60656e+09	6.75095e+09	6.5493e+09	Acetyl [N-Term]
High	High	Master Protein	Q8IWZ3	Ankyrin repeat and KH domain-containing protein 1 OS=Homo sapiens GN=ANKHD1 PE=1 SV=1	0	0	44	70	864	55	1	2542	269.3	5.73	20752	1218.68	69	45	0	2.33933e+08	2.28564e+08	2.15461e+08	3.21371e+08	3.16787e+08	3.14787e+08	3.14649e+08	3.06744e+08	2.86386e+08	Acetyl [N-Term]
High	High	Master Protein	P19338	Nucleolin OS=Homo sapiens GN=NCL PE=1 SV=3	0	0	39	33	1440	33	1	710	76.6	4.7	34615	1217.42	33	11	0	1.20165e+10	1.21091e+10	1.15717e+10	1.56266e+10	1.56225e+10	1.54927e+10	1.50602e+10	1.46005e+10	1.55278e+10
High	High	Master Protein	O00571	ATP-dependent RNA helicase DDX3X OS=Homo sapiens GN=DDX3X PE=1 SV=3	0	0	68	49	1228	18	1	662	73.2	7.18	30772	1210.91	49	23	39	2.84242e+09	2.6531e+09	2.57929e+09	3.27191e+09	3.42239e+09	3.20821e+09	3.15311e+09	3.17704e+09	3.1767e+09	Acetyl [N-Term]
High	High	Master Protein	P55795	Heterogeneous nuclear ribonucleoprotein H2 OS=Homo sapiens GN=HNRNPH2 PE=1 SV=1	0	0	52	19	825	10	1	449	49.2	6.3	21173	1209.1	19	9	0	4.92347e+08	5.02209e+08	4.90121e+08	6.70224e+08	7.35673e+08	6.89505e+08	6.82068e+08	6.94064e+08	6.36552e+08	Acetyl [N-Term]
High	High	Master Protein	Q01813	ATP-dependent 6-phosphofructokinase, platelet type OS=Homo sapiens GN=PFKP PE=1 SV=2	0	0	58	35	835	32	1	784	85.5	7.55	19111	1208.48	34	20	2	8.19874e+08	8.85694e+08	8.44997e+08	1.18365e+09	1.18263e+09	1.20286e+09	9.48816e+08	9.68562e+08	9.31315e+08	Acetyl [N-Term]
High	High	Master Protein	P46821	Microtubule-associated protein 1B OS=Homo sapiens GN=MAP1B PE=1 SV=2	0	0	55	90	964	88	1	2468	270.5	4.81	22368	1205.74	90	47	2	2.32431e+08	2.42733e+08	2.41319e+08	4.92438e+08	4.98473e+08	4.8224e+08	5.2053e+08	5.18728e+08	5.06562e+08	Acetyl [N-Term]
High	High	Master Protein	P05388	60S acidic ribosomal protein P0 OS=Homo sapiens GN=RPLP0 PE=1 SV=1	0	0	58	15	775	5	1	317	34.3	5.97	14553	1199.53	15	11	12	4.02872e+09	4.58174e+09	4.09191e+09	5.13365e+09	5.00676e+09	4.96353e+09	4.78019e+09	4.65265e+09	4.48852e+09
High	High	Master Protein	O15371	Eukaryotic translation initiation factor 3 subunit D OS=Homo sapiens GN=EIF3D PE=1 SV=1	0	0	66	32	793	32	1	548	63.9	6.05	16504	1198.21	32	23	0	8.60103e+08	8.98808e+08	8.64955e+08	1.10628e+09	1.16012e+09	1.11493e+09	1.09352e+09	1.07196e+09	9.96953e+08
High	High	Master Protein	P30041	Peroxiredoxin-6 OS=Homo sapiens GN=PRDX6 PE=1 SV=3	0	0	79	24	1036	24	1	224	25	6.38	23381	1194	23	13	0	7.03553e+09	7.19057e+09	7.02861e+09	8.68279e+09	9.08767e+09	9.21055e+09	7.00965e+09	7.31526e+09	7.14622e+09
High	High	Master Protein	P05455	Lupus La protein OS=Homo sapiens GN=SSB PE=1 SV=2	0	0	64	33	1055	33	1	408	46.8	7.12	26405	1188.74	32	22	0	3.03728e+09	3.1694e+09	2.90111e+09	3.46911e+09	3.54343e+09	3.48377e+09	3.50299e+09	3.754e+09	3.52522e+09	Acetyl [N-Term]
High	High	Master Protein	P55884	Eukaryotic translation initiation factor 3 subunit B OS=Homo sapiens GN=EIF3B PE=1 SV=3	0	0	63	46	996	46	1	814	92.4	5	21770	1180.1	46	30	0	2.11184e+09	2.06652e+09	2.03613e+09	2.34261e+09	2.41884e+09	2.42711e+09	2.22542e+09	2.34428e+09	2.15284e+09	Acetyl [N-Term]
High	High	Master Protein	Q99613	Eukaryotic translation initiation factor 3 subunit C OS=Homo sapiens GN=EIF3C PE=1 SV=1	0	0	47	43	1040	42	1	913	105.3	5.68	26331	1176.84	43	20	1	2.04003e+09	2.16062e+09	2.01725e+09	2.71847e+09	2.71984e+09	2.58232e+09	2.61034e+09	2.64387e+09	2.48036e+09
High	High	Master Protein	Q99996	A-kinase anchor protein 9 OS=Homo sapiens GN=AKAP9 PE=1 SV=3	0	0	43	148	1079	146	1	3911	453.4	4.98	22607	1172.49	145	69	2	3.23596e+08	3.15305e+08	3.13625e+08	4.28649e+08	4.23387e+08	4.17111e+08	2.96613e+08	2.97535e+08	2.95492e+08
High	High	Master Protein	P38606	V-type proton ATPase catalytic subunit A OS=Homo sapiens GN=ATP6V1A PE=1 SV=2	0	0	70	35	899	35	1	617	68.3	5.52	21297	1171.7	35	22	0	1.67941e+09	1.7158e+09	1.62029e+09	2.1382e+09	2.1474e+09	2.2467e+09	1.76871e+09	1.79099e+09	1.73633e+09
High	High	Master Protein	P63244	Receptor of activated protein C kinase 1 OS=Homo sapiens GN=RACK1 PE=1 SV=3	0	0	81	22	904	22	1	317	35.1	7.69	21245	1168.72	22	12	0	6.06496e+09	6.36959e+09	6.39469e+09	7.38026e+09	7.78862e+09	7.46561e+09	7.38399e+09	7.29884e+09	7.15148e+09	Acetyl [N-Term; N-Term]
High	High	Master Protein	O60763	General vesicular transport factor p115 OS=Homo sapiens GN=USO1 PE=1 SV=2	0	0	52	41	831	41	1	962	107.8	4.91	23197	1168.63	41	26	0	7.76508e+08	7.7971e+08	7.43017e+08	9.90502e+08	1.06476e+09	1.0037e+09	8.91599e+08	8.85136e+08	8.8087e+08
High	High	Master Protein	O43776	Asparagine--tRNA ligase, cytoplasmic OS=Homo sapiens GN=NARS PE=1 SV=1	0	0	56	38	918	38	1	548	62.9	6.25	21563	1168.02	37	20	0	1.95961e+09	2.01411e+09	1.91125e+09	2.88545e+09	2.58941e+09	2.58234e+09	2.53811e+09	2.52804e+09	2.4411e+09	Acetyl [N-Term]
High	High	Master Protein	O75874	Isocitrate dehydrogenase [NADP] cytoplasmic OS=Homo sapiens GN=IDH1 PE=1 SV=2	0	0	70	26	1068	24	1	414	46.6	7.01	28411	1166.55	25	15	0	3.26414e+09	3.28452e+09	3.17564e+09	4.40365e+09	4.39464e+09	4.52237e+09	4.10784e+09	4.44673e+09	4.38309e+09
High	High	Master Protein	P09972	Fructose-bisphosphate aldolase C OS=Homo sapiens GN=ALDOC PE=1 SV=2	0	0	85	29	843	24	1	364	39.4	6.87	19772	1165	29	19	0	8.77042e+08	9.32791e+08	8.98066e+08	1.3353e+09	1.34663e+09	1.33779e+09	1.164e+09	1.13312e+09	1.13483e+09
High	High	Master Protein	P35658	Nuclear pore complex protein Nup214 OS=Homo sapiens GN=NUP214 PE=1 SV=2	0	0	48	65	935	65	1	2090	213.5	7.47	23599	1163.63	65	36	0	4.90679e+08	5.03591e+08	4.80798e+08	5.99551e+08	5.94265e+08	5.69679e+08	5.59208e+08	5.62104e+08	5.18923e+08	Acetyl [N-Term]
High	High	Master Protein	Q14566	DNA replication licensing factor MCM6 OS=Homo sapiens GN=MCM6 PE=1 SV=1	0	0	57	48	961	48	1	821	92.8	5.41	23048	1162.54	48	28	0	1.65322e+09	1.65742e+09	1.64819e+09	1.73442e+09	1.82178e+09	1.84596e+09	1.20776e+09	1.28927e+09	1.22598e+09	Acetyl [N-Term]
High	High	Master Protein	Q12888	Tumor suppressor p53-binding protein 1 OS=Homo sapiens GN=TP53BP1 PE=1 SV=2	0	0	57	80	846	80	1	1972	213.4	4.7	20494	1162.26	75	56	0	2.66048e+08	2.77477e+08	2.61484e+08	3.40042e+08	3.23041e+08	3.18948e+08	3.03815e+08	3.17532e+08	2.85815e+08
High	High	Master Protein	P45880	Voltage-dependent anion-selective channel protein 2 OS=Homo sapiens GN=VDAC2 PE=1 SV=2	0	0	67	17	825	17	1	294	31.5	7.56	22678	1161.95	17	8	0	2.13568e+09	2.18267e+09	2.05003e+09	2.46842e+09	2.41477e+09	2.3262e+09	1.86989e+09	1.91102e+09	1.7773e+09	Acetyl [N-Term]
High	High	Master Protein	P36578	60S ribosomal protein L4 OS=Homo sapiens GN=RPL4 PE=1 SV=5	0	0	51	30	921	30	1	427	47.7	11.06	19108	1156.79	30	14	0	5.26852e+09	5.56166e+09	5.38209e+09	6.97075e+09	7.20345e+09	7.21304e+09	6.77802e+09	7.05631e+09	7.0857e+09	Acetyl [N-Term]
High	High	Master Protein	O95359	Transforming acidic coiled-coil-containing protein 2 OS=Homo sapiens GN=TACC2 PE=1 SV=3	0	0	56	101	868	98	1	2948	309.2	4.79	19216	1155.82	99	64	4	3.67583e+08	3.84088e+08	3.50394e+08	5.20514e+08	5.51498e+08	4.99013e+08	3.66938e+08	3.57588e+08	3.43392e+08
High	High	Master Protein	P09429	High mobility group protein B1 OS=Homo sapiens GN=HMGB1 PE=1 SV=3	0	0	46	19	774	14	1	215	24.9	5.74	18013	1153.24	19	15	7	3.28913e+09	3.21234e+09	3.07902e+09	3.94834e+09	4.07612e+09	4.18851e+09	3.70464e+09	3.76635e+09	3.63686e+09
High	High	Master Protein	P02545	Prelamin-A/C OS=Homo sapiens GN=LMNA PE=1 SV=1	0	0	78	57	1315	56	1	664	74.1	7.02	33658	1150.48	56	29	1	4.0813e+09	4.00352e+09	3.7929e+09	5.00471e+09	5.17875e+09	5.06684e+09	4.84643e+09	4.77274e+09	4.79572e+09	Acetyl [N-Term]
High	High	Master Protein	P31040	Succinate dehydrogenase [ubiquinone] flavoprotein subunit, mitochondrial OS=Homo sapiens GN=SDHA PE=1 SV=2	0	0	62	29	805	29	1	664	72.6	7.39	18887	1150.4	28	19	0	8.59265e+08	9.07807e+08	8.34137e+08	1.05711e+09	1.03622e+09	1.00315e+09	1.03443e+09	9.46678e+08	9.60295e+08
High	High	Master Protein	Q8NC51	Plasminogen activator inhibitor 1 RNA-binding protein OS=Homo sapiens GN=SERBP1 PE=1 SV=2	0	0	59	33	988	33	1	408	44.9	8.65	22132	1149.49	31	18	0	3.45134e+09	3.39164e+09	3.70425e+09	3.92551e+09	4.37469e+09	4.3467e+09	3.84589e+09	3.78558e+09	3.86348e+09
High	High	Master Protein	Q14166	Tubulin--tyrosine ligase-like protein 12 OS=Homo sapiens GN=TTLL12 PE=1 SV=2	0	0	68	38	795	38	1	644	74.4	5.53	16515	1147.19	38	23	0	1.40038e+09	1.3645e+09	1.3757e+09	1.62046e+09	1.67913e+09	1.79516e+09	1.76606e+09	1.75071e+09	1.62744e+09	Acetyl [N-Term]
High	High	Master Protein	P35222	Catenin beta-1 OS=Homo sapiens GN=CTNNB1 PE=1 SV=1	0	0	62	37	892	31	1	781	85.4	5.86	23030	1141.46	37	22	0	7.01426e+08	7.35843e+08	6.86625e+08	9.9789e+08	1.0121e+09	1.02988e+09	5.01259e+08	5.38466e+08	5.27135e+08	Acetyl [N-Term]
High	High	Master Protein	P14868	Aspartate--tRNA ligase, cytoplasmic OS=Homo sapiens GN=DARS PE=1 SV=2	0	0	70	39	1079	39	1	501	57.1	6.55	27568	1141.01	39	20	0	2.10325e+09	2.23278e+09	2.10852e+09	2.5675e+09	2.66667e+09	2.60064e+09	2.51495e+09	2.52291e+09	2.38981e+09
High	High	Master Protein	Q7L014	Probable ATP-dependent RNA helicase DDX46 OS=Homo sapiens GN=DDX46 PE=1 SV=2	0	0	54	63	967	61	1	1031	117.3	9.29	22030	1140.76	61	32	2	8.56289e+08	8.34528e+08	8.13904e+08	9.47087e+08	9.84834e+08	9.6624e+08	9.73485e+08	9.61912e+08	9.41115e+08
High	High	Master Protein	P08473	Neprilysin OS=Homo sapiens GN=MME PE=1 SV=2	0	0	59	41	885	41	1	750	85.5	5.73	19678	1133.12	40	25	0	1.07851e+09	1.08544e+09	1.03621e+09	1.20026e+09	1.25183e+09	1.23107e+09	1.17472e+09	1.19125e+09	1.15287e+09
High	High	Master Protein	Q3LXA3	Triokinase/FMN cyclase OS=Homo sapiens GN=TKFC PE=1 SV=2	0	0	66	32	790	32	1	575	58.9	7.49	19730	1127.9	31	22	0	1.08196e+09	1.11658e+09	1.06139e+09	1.49501e+09	1.565e+09	1.5633e+09	1.42559e+09	1.37367e+09	1.33252e+09
High	High	Master Protein	P32969	60S ribosomal protein L9 OS=Homo sapiens GN=RPL9 PE=1 SV=1	0	0	62	11	611	11	1	192	21.9	9.95	13057	1126.97	11	10	0	9.58797e+08	1.15859e+09	1.08384e+09	1.28299e+09	1.49388e+09	1.54076e+09	1.28454e+09	1.38737e+09	1.29411e+09
High	High	Master Protein	Q9UQ80	Proliferation-associated protein 2G4 OS=Homo sapiens GN=PA2G4 PE=1 SV=3	0	0	74	30	1210	30	1	394	43.8	6.55	34200	1123.8	30	15	0	4.97257e+09	5.42302e+09	5.08549e+09	5.71774e+09	6.31257e+09	6.26412e+09	5019812808	5.30369e+09	4.98899e+09	Acetyl [N-Term]
High	High	Master Protein	P07910	Heterogeneous nuclear ribonucleoproteins C1/C2 OS=Homo sapiens GN=HNRNPC PE=1 SV=4	0	0	74	28	1132	27	1	306	33.7	5.08	30489	1119.86	28	15	1	7.8794e+09	7.70319e+09	7.68612e+09	9.92018e+09	9.48834e+09	1.00352e+10	7.96299e+09	8.3851e+09	8.55949e+09
High	High	Master Protein	Q13151	Heterogeneous nuclear ribonucleoprotein A0 OS=Homo sapiens GN=HNRNPA0 PE=1 SV=1	0	0	52	12	652	11	1	305	30.8	9.29	15724	1119.6	12	8	0	1.06835e+09	1.1078e+09	1.11094e+09	1.34979e+09	1.36801e+09	1.32816e+09	1.37141e+09	1.45404e+09	1.42039e+09	Acetyl [N-Term]
High	High	Master Protein	O15523	ATP-dependent RNA helicase DDX3Y OS=Homo sapiens GN=DDX3Y PE=1 SV=2	0	0	60	41	1040	10	1	660	73.1	7.55	24369	1118.69	41	19	0	1.28167e+08	1.41261e+08	1.30545e+08	1.63622e+08	1.85836e+08	1.70552e+08	2.46222e+08	2.27442e+08	2.24266e+08
High	High	Master Protein	Q92900	Regulator of nonsense transcripts 1 OS=Homo sapiens GN=UPF1 PE=1 SV=2	0	0	63	60	1019	59	1	1129	124.3	6.61	22869	1118.3	60	33	1	1.26602e+09	1.26389e+09	1.27478e+09	1.53516e+09	1.56269e+09	1.57318e+09	1.47812e+09	1.45143e+09	1.41032e+09
High	High	Master Protein Candidate	P62807	Histone H2B type 1-C/E/F/G/I OS=Homo sapiens GN=HIST1H2BC PE=1 SV=4	0	0	65	10	1117	2	1	126	13.9	10.32	33199	1114.8	10	3	0	2.03352e+10	2.22067e+10	1.9637e+10	2.82523e+10	3.19079e+10	2.72903e+10	2.07075e+10	1.92348e+10	1.72651e+10
High	High	Master Protein Candidate	Q99879	Histone H2B type 1-M OS=Homo sapiens GN=HIST1H2BM PE=1 SV=3	0	0	65	10	1117	2	1	126	14	10.32	33199	1114.8	10	3	0	2.03352e+10	2.22067e+10	1.9637e+10	2.82523e+10	3.19079e+10	2.72903e+10	2.07075e+10	1.92348e+10	1.72651e+10
High	High	Master Protein Candidate	Q93079	Histone H2B type 1-H OS=Homo sapiens GN=HIST1H2BH PE=1 SV=3	0	0	65	10	1117	2	1	126	13.9	10.32	33199	1114.8	10	3	0	2.03352e+10	2.22067e+10	1.9637e+10	2.82523e+10	3.19079e+10	2.72903e+10	2.07075e+10	1.92348e+10	1.72651e+10
High	High	Master Protein Candidate	Q99880	Histone H2B type 1-L OS=Homo sapiens GN=HIST1H2BL PE=1 SV=3	0	0	65	10	1117	2	1	126	13.9	10.32	33199	1114.8	10	3	0	2.03352e+10	2.22067e+10	1.9637e+10	2.82523e+10	3.19079e+10	2.72903e+10	2.07075e+10	1.92348e+10	1.72651e+10
High	High	Master Protein	P58876	Histone H2B type 1-D OS=Homo sapiens GN=HIST1H2BD PE=1 SV=2	0	0	65	10	1117	2	1	126	13.9	10.32	33199	1114.8	10	3	10	2.03352e+10	2.22067e+10	1.9637e+10	2.82523e+10	3.19079e+10	2.72903e+10	2.07075e+10	1.92348e+10	1.72651e+10
High	High	Master Protein Candidate	Q5QNW6	Histone H2B type 2-F OS=Homo sapiens GN=HIST2H2BF PE=1 SV=3	0	0	65	10	1117	2	1	126	13.9	10.32	33199	1114.8	10	3	0	2.03352e+10	2.22067e+10	1.9637e+10	2.82523e+10	3.19079e+10	2.72903e+10	2.07075e+10	1.92348e+10	1.72651e+10
High	High	Master Protein Candidate	Q99877	Histone H2B type 1-N OS=Homo sapiens GN=HIST1H2BN PE=1 SV=3	0	0	65	10	1117	2	1	126	13.9	10.32	33199	1114.8	10	3	0	2.03352e+10	2.22067e+10	1.9637e+10	2.82523e+10	3.19079e+10	2.72903e+10	2.07075e+10	1.92348e+10	1.72651e+10
High	High	None	O60814	Histone H2B type 1-K OS=Homo sapiens GN=HIST1H2BK PE=1 SV=3	0	0	58	9	1114	2	1	126	13.9	10.32	33098	1114.8	9	3	0	2.03348e+10	2.22065e+10	1.96368e+10	2.82519e+10	3.19079e+10	2.72903e+10	2.07072e+10	1.92346e+10	1.72649e+10
High	High	None	P57053	Histone H2B type F-S OS=Homo sapiens GN=H2BFS PE=1 SV=2	0	0	53	8	1112	2	1	126	13.9	10.37	33075	1114.8	8	3	0	2.03328e+10	2.22053e+10	1.96353e+10	2.82366e+10	3.18938e+10	2.72635e+10	2.06911e+10	1.92235e+10	1.72459e+10
High	High	Master Protein	P26196	Probable ATP-dependent RNA helicase DDX6 OS=Homo sapiens GN=DDX6 PE=1 SV=2	0	0	75	32	768	32	1	483	54.4	8.66	16973	1111.97	32	22	0	8.50993e+08	9.02767e+08	8.70648e+08	1.21889e+09	1.245e+09	1.2383e+09	1.18189e+09	1.21497e+09	1.19681e+09
High	High	Master Protein	Q9UQE7	Structural maintenance of chromosomes protein 3 OS=Homo sapiens GN=SMC3 PE=1 SV=2	0	0	53	76	954	75	1	1217	141.5	7.18	23144	1109.89	74	40	1	9.72156e+08	9.53436e+08	8.97971e+08	1.05437e+09	1.07644e+09	1.07228e+09	8.51533e+08	8.52773e+08	8.21796e+08
High	High	Master Protein	P34897	Serine hydroxymethyltransferase, mitochondrial OS=Homo sapiens GN=SHMT2 PE=1 SV=3	0	0	76	35	1073	33	1	504	56	8.53	26538	1106.95	35	20	3	3.12854e+09	3.1187e+09	2.93637e+09	4.32531e+09	4.41926e+09	4.1495e+09	3.73244e+09	3.74952e+09	3.62428e+09
High	High	Master Protein	P24752	Acetyl-CoA acetyltransferase, mitochondrial OS=Homo sapiens GN=ACAT1 PE=1 SV=1	0	0	67	24	710	24	1	427	45.2	8.85	17163	1106.51	24	14	0	1.51608e+09	1.52714e+09	1.4477e+09	1.88486e+09	2.0365e+09	2.12074e+09	2.00859e+09	1.88172e+09	1.87594e+09
High	High	Master Protein	P55060	Exportin-2 OS=Homo sapiens GN=CSE1L PE=1 SV=3	0	0	60	54	1159	54	1	971	110.3	5.77	29198	1105.56	53	26	0	3.31195e+09	3.45459e+09	3.41056e+09	3.72358e+09	3.8471e+09	3.74626e+09	3.15439e+09	3.1318e+09	3.04318e+09	Acetyl [N-Term]
High	High	Master Protein	O60506	Heterogeneous nuclear ribonucleoprotein Q OS=Homo sapiens GN=SYNCRIP PE=1 SV=2	0	0	64	34	1034	22	1	623	69.6	8.59	24139	1102.18	32	20	0	2.68066e+09	2.5049e+09	2.58059e+09	3.01096e+09	3.21774e+09	3.23695e+09	2.74457e+09	2.78775e+09	2701609882	Acetyl [N-Term]
High	High	Master Protein	P48634	Protein PRRC2A OS=Homo sapiens GN=PRRC2A PE=1 SV=3	0	0	58	86	921	82	1	2157	228.7	9.45	21464	1101.45	84	49	0	4.36725e+08	4.53169e+08	4.22109e+08	5.24312e+08	5.42906e+08	5.1588e+08	4.89957e+08	4.82262e+08	4.6131e+08
High	High	Master Protein	A0MZ66	Shootin-1 OS=Homo sapiens GN=SHTN1 PE=1 SV=4	0	0	68	48	776	48	1	631	71.6	5.33	15817	1098.37	48	25	0	6.23005e+08	6.15962e+08	5.81915e+08	7.31879e+08	8.11554e+08	7.91366e+08	7.23891e+08	7.53373e+08	7.39218e+08	Acetyl [N-Term]
High	High	Master Protein	Q9Y265	RuvB-like 1 OS=Homo sapiens GN=RUVBL1 PE=1 SV=1	0	0	73	30	786	30	1	456	50.2	6.42	17582	1098.13	29	20	0	1.58158e+09	1.58361e+09	1.46602e+09	1.84947e+09	2.04487e+09	1.83371e+09	1.89585e+09	1.84484e+09	1.77498e+09
High	High	Master Protein	P10586	Receptor-type tyrosine-protein phosphatase F OS=Homo sapiens GN=PTPRF PE=1 SV=2	0	0	57	75	797	68	1	1907	212.7	6.3	17466	1097.66	75	45	7	3.88605e+08	3.81237e+08	3.74863e+08	5.61464e+08	5.71124e+08	5.70882e+08	5.02091e+08	5.07195e+08	5.0196e+08
High	High	Master Protein	Q9NR30	Nucleolar RNA helicase 2 OS=Homo sapiens GN=DDX21 PE=1 SV=5	0	0	66	51	942	49	1	783	87.3	9.28	20849	1097.64	51	27	2	1.20539e+09	1.26883e+09	1.18713e+09	1.602e+09	1.56823e+09	1.54438e+09	1.56839e+09	1.55735e+09	1.49533e+09
High	High	Master Protein	P27695	DNA-(apurinic or apyrimidinic site) lyase OS=Homo sapiens GN=APEX1 PE=1 SV=2	0	0	69	24	621	24	1	318	35.5	8.12	12797	1097.01	23	17	0	2.0483e+09	2.23013e+09	2.14197e+09	2.90785e+09	3.06578e+09	2.93895e+09	2.30729e+09	2.25083e+09	2.2623e+09
High	High	Master Protein	Q10567	AP-1 complex subunit beta-1 OS=Homo sapiens GN=AP1B1 PE=1 SV=2	0	0	51	48	1008	26	1	949	104.6	5.06	22681	1096.24	48	27	0	6.50285e+08	6.91692e+08	7.02009e+08	8.67638e+08	8.61261e+08	8.95141e+08	7.86217e+08	7.46194e+08	7.296e+08
High	High	Master Protein	P27816	Microtubule-associated protein 4 OS=Homo sapiens GN=MAP4 PE=1 SV=3	0	0	70	70	1274	70	1	1152	120.9	5.43	30992	1095.33	68	33	0	2.23035e+09	2.31009e+09	2.28911e+09	3.11888e+09	3.34918e+09	3.15503e+09	3.03959e+09	3.03575e+09	3.08508e+09	Acetyl [N-Term]
High	High	Master Protein	P45974	Ubiquitin carboxyl-terminal hydrolase 5 OS=Homo sapiens GN=USP5 PE=1 SV=2	0	0	60	49	950	47	1	858	95.7	5.03	21216	1095.12	48	30	2	1.59062e+09	1.56627e+09	1.48415e+09	1.93977e+09	2.01714e+09	2.03275e+09	2.0312e+09	2.00427e+09	1.96513e+09	Acetyl [N-Term]
High	High	Master Protein	O60841	Eukaryotic translation initiation factor 5B OS=Homo sapiens GN=EIF5B PE=1 SV=4	0	0	45	70	991	68	1	1220	138.7	5.49	23995	1094.63	68	41	1	1109430087	1.24895e+09	1.1453e+09	1.56674e+09	1.55371e+09	1.52822e+09	1.47837e+09	1.47464e+09	1.46876e+09
High	High	Master Protein Candidate	Q16778	Histone H2B type 2-E OS=Homo sapiens GN=HIST2H2BE PE=1 SV=3	0	0	64	9	1067	1	1	126	13.9	10.32	32181	1093.83	9	2	0	7.06884e+08	734389398	7.30386e+08	7.48283e+08	7.25698e+08	7.36948e+08	5.88148e+08	559929832	5.45935e+08
High	High	Master Protein Candidate	P33778	Histone H2B type 1-B OS=Homo sapiens GN=HIST1H2BB PE=1 SV=2	0	0	64	9	1067	1	1	126	13.9	10.32	32181	1093.83	9	2	0	7.06884e+08	734389398	7.30386e+08	7.48283e+08	7.25698e+08	7.36948e+08	5.88148e+08	559929832	5.45935e+08
High	High	Master Protein	P23527	Histone H2B type 1-O OS=Homo sapiens GN=HIST1H2BO PE=1 SV=3	0	0	64	9	1067	1	1	126	13.9	10.32	32181	1093.83	9	2	0	7.06884e+08	734389398	7.30386e+08	7.48283e+08	7.25698e+08	7.36948e+08	5.88148e+08	559929832	5.45935e+08
High	High	None	P06899	Histone H2B type 1-J OS=Homo sapiens GN=HIST1H2BJ PE=1 SV=3	0	0	57	8	1064	1	1	126	13.9	10.32	32081	1093.83	8	2	0	7.06884e+08	734389398	7.30386e+08	7.48283e+08	7.25698e+08	7.36948e+08	5.88148e+08	559929832	5.45935e+08
High	High	None	Q8N257	Histone H2B type 3-B OS=Homo sapiens GN=HIST3H2BB PE=1 SV=3	0	0	59	8	1035	1	1	126	13.9	10.32	31691	1093.83	8	2	0	7.06884e+08	734389398	7.30386e+08	7.48283e+08	7.25698e+08	7.36948e+08	5.88148e+08	559929832	5.45935e+08
High	High	Master Protein	P62937	Peptidyl-prolyl cis-trans isomerase A OS=Homo sapiens GN=PPIA PE=1 SV=2	0	0	76	12	1320	9	1	165	18	7.81	39004	1089.63	12	7	4	1.85563e+10	1.9406e+10	1.81911e+10	2.41434e+10	2.35261e+10	2.07064e+10	2.31295e+10	2.43406e+10	2.27505e+10	Acetyl [N-Term]
High	High	Master Protein	P32119	Peroxiredoxin-2 OS=Homo sapiens GN=PRDX2 PE=1 SV=5	0	0	67	18	950	17	1	198	21.9	5.97	19240	1087.4	18	10	0	4.99534e+09	5.14736e+09	4.91155e+09	5.75542e+09	6.17087e+09	5.82133e+09	5.19222e+09	5.59735e+09	5.42171e+09
High	High	Master Protein	Q15437	Protein transport protein Sec23B OS=Homo sapiens GN=SEC23B PE=1 SV=2	0	0	67	36	790	33	1	767	86.4	6.89	16996	1075.07	36	20	4	7.48858e+08	7.35803e+08	7.08461e+08	1.06284e+09	1.03296e+09	1.05089e+09	8.4701e+08	8.20705e+08	8.63464e+08	Acetyl [N-Term]
High	High	Master Protein	Q9NZB2	Constitutive coactivator of PPAR-gamma-like protein 1 OS=Homo sapiens GN=FAM120A PE=1 SV=2	0	0	65	50	771	48	1	1118	121.8	8.88	18006	1074.82	50	34	2	5.42686e+08	5.88947e+08	5.76047e+08	8.14689e+08	8.41667e+08	8.18865e+08	7.53881e+08	7.41654e+08	7.32251e+08
High	High	Master Protein	P63241	Eukaryotic translation initiation factor 5A-1 OS=Homo sapiens GN=EIF5A PE=1 SV=2	0	0	66	15	803	10	1	154	16.8	5.24	19680	1074.1	14	11	8	3.04536e+09	2.49686e+09	2.64788e+09	2.75098e+09	3.18368e+09	3.17239e+09	2.83543e+09	2.90288e+09	2.68662e+09	Acetyl [N-Term]
High	High	Master Protein	P13637	Sodium/potassium-transporting ATPase subunit alpha-3 OS=Homo sapiens GN=ATP1A3 PE=1 SV=3	0	0	21	19	650	2	1	1013	111.7	5.38	16501	1074.1	18	11	0	292158	200238	192422		297377	125235		2.73777e+06
High	High	Master Protein	P27824	Calnexin OS=Homo sapiens GN=CANX PE=1 SV=2	0	0	46	37	955	37	1	592	67.5	4.6	23913	1073.65	37	20	0	1.93781e+09	1.92e+09	1.87279e+09	2.48968e+09	2.43004e+09	2.38923e+09	2.10396e+09	2.08156e+09	2.11103e+09
High	High	Master Protein	P20290	Transcription factor BTF3 OS=Homo sapiens GN=BTF3 PE=1 SV=1	0	0	71	13	607	13	1	206	22.2	9.38	14889	1073.53	13	7	0	5.5326e+08	5.77027e+08	5.92228e+08	8.05213e+08	8.53866e+08	9.08536e+08	8.17741e+08	8.49855e+08	7.38073e+08
High	High	Master Protein	P08243	Asparagine synthetase [glutamine-hydrolyzing] OS=Homo sapiens GN=ASNS PE=1 SV=4	0	0	66	34	952	34	1	561	64.3	6.86	20354	1070.6	34	17	0	1.8304e+09	1.99997e+09	1.88777e+09	3.24547e+09	3.33209e+09	3.22835e+09	3.10196e+09	3.06109e+09	2.91238e+09
High	High	Master Protein	P41250	Glycine--tRNA ligase OS=Homo sapiens GN=GARS PE=1 SV=3	0	0	56	38	966	38	1	739	83.1	7.03	20931	1069.93	38	19	0	2.76451e+09	2.64171e+09	2.58486e+09	3.98315e+09	4.27551e+09	4.30918e+09	3.4333e+09	3962477842	3.6847e+09
High	High	Master Protein	O75153	Clustered mitochondria protein homolog OS=Homo sapiens GN=CLUH PE=1 SV=2	0	0	60	63	922	63	1	1309	146.6	6.13	21670	1069.66	63	30	0	9.89589e+08	1.00818e+09	9.80081e+08	1.2468e+09	1.2275e+09	1.24843e+09	1.28814e+09	1.29372e+09	1.24753e+09
High	High	Master Protein	Q12931	Heat shock protein 75 kDa, mitochondrial OS=Homo sapiens GN=TRAP1 PE=1 SV=3	0	0	60	40	853	39	1	704	80.1	8.21	18689	1066.34	39	19	0	1.31725e+09	1.43847e+09	1.34049e+09	1.90341e+09	1.86483e+09	1.94439e+09	1.6819e+09	1.67008e+09	1.69911e+09
High	High	Master Protein	Q16881	Thioredoxin reductase 1, cytoplasmic OS=Homo sapiens GN=TXNRD1 PE=1 SV=3	0	0	57	26	674	25	1	649	70.9	7.39	14893	1066.16	26	18	1	1.04549e+09	1.05445e+09	1.03516e+09	1.81339e+09	1.869e+09	1.8535e+09	1.62425e+09	1.57536e+09	1.55352e+09
High	High	Master Protein	P13796	Plastin-2 OS=Homo sapiens GN=LCP1 PE=1 SV=6	0	0	77	44	894	35	1	627	70.2	5.43	21261	1062.86	44	29	10	1.71458e+09	1.60254e+09	1.52029e+09	2.25665e+09	2.21546e+09	2.21251e+09	1.80903e+09	1.79698e+09	1.7261e+09
High	High	Master Protein	P62195	26S protease regulatory subunit 8 OS=Homo sapiens GN=PSMC5 PE=1 SV=1	0	0	72	28	765	26	1	406	45.6	7.55	18066	1060.4	28	17	0	1.30069e+09	1.36603e+09	1.33243e+09	1.76229e+09	1.79964e+09	1.7418e+09	1.4632e+09	1.50647e+09	1.4616e+09	Acetyl [N-Term]
High	High	Master Protein	O75534	Cold shock domain-containing protein E1 OS=Homo sapiens GN=CSDE1 PE=1 SV=2	0	0	63	48	974	48	1	798	88.8	6.25	22876	1060.1	48	23	0	1.87024e+09	1.94582e+09	1.83322e+09	2.47271e+09	2.50052e+09	2.49701e+09	2.44665e+09	2.51951e+09	2.43999e+09	Acetyl [N-Term]
High	High	Master Protein	P23526	Adenosylhomocysteinase OS=Homo sapiens GN=AHCY PE=1 SV=4	0	0	68	29	1007	28	1	432	47.7	6.34	24958	1059.92	29	13	1	6.48641e+09	6.85313e+09	6.61432e+09	8.29716e+09	8.66142e+09	7.95868e+09	7.36261e+09	7.58316e+09	7.42359e+09	Acetyl [N-Term]
High	High	Master Protein	P35232	Prohibitin OS=Homo sapiens GN=PHB PE=1 SV=1	0	0	84	23	729	23	1	272	29.8	5.76	19067	1056.34	23	12	0	1.55955e+09	1.64702e+09	1.53844e+09	2.46473e+09	2.38353e+09	2.31854e+09	1.85401e+09	1.77672e+09	1.63388e+09
High	High	Master Protein	Q9UMS4	Pre-mRNA-processing factor 19 OS=Homo sapiens GN=PRPF19 PE=1 SV=1	0	0	75	24	685	24	1	504	55.1	6.61	12366	1054.44	24	13	0	1.73713e+09	1.71663e+09	1.6387e+09	2.0394e+09	2.17626e+09	2.0421e+09	1.88023e+09	1.90874e+09	1.79102e+09	Acetyl [N-Term]
High	High	Master Protein	Q9NY33	Dipeptidyl peptidase 3 OS=Homo sapiens GN=DPP3 PE=1 SV=2	0	0	61	33	672	33	1	737	82.5	5.1	15142	1052.21	33	18	0	7.0498e+08	7.77726e+08	7.09023e+08	1.13263e+09	1.08637e+09	1.12401e+09	8.29415e+08	7.92638e+08	7.70111e+08	Acetyl [N-Term]
High	High	Master Protein	P00441	Superoxide dismutase [Cu-Zn] OS=Homo sapiens GN=SOD1 PE=1 SV=2	0	0	65	8	566	8	1	154	15.9	6.13	13254	1049.28	8	7	0	2.0736e+09	2.22617e+09	2.15707e+09	2.95346e+09	3.28357e+09	4.0701e+09	2.8724e+09	3.08579e+09	2.94182e+09
High	High	Master Protein	P55786	Puromycin-sensitive aminopeptidase OS=Homo sapiens GN=NPEPPS PE=1 SV=2	0	0	56	50	999	50	1	919	103.2	5.72	22655	1045.68	50	26	0	2.20402e+09	2.20185e+09	2.16222e+09	2.77499e+09	2.89298e+09	2.86861e+09	2.63828e+09	2.73085e+09	2.65161e+09
High	High	Master Protein	P55209	Nucleosome assembly protein 1-like 1 OS=Homo sapiens GN=NAP1L1 PE=1 SV=1	0	0	54	22	726	20	1	391	45.3	4.46	15008	1044.85	22	11	2	2.14439e+09	2.24576e+09	2.21255e+09	2.72746e+09	2.61563e+09	2.72239e+09	2.70228e+09	2.75851e+09	2.68219e+09	Acetyl [N-Term; N-Term]
High	High	Master Protein	Q9UHX1	Poly(U)-binding-splicing factor PUF60 OS=Homo sapiens GN=PUF60 PE=1 SV=1	0	0	67	29	777	29	1	559	59.8	5.29	19012	1043.66	28	16	0	1.08242e+09	1.15655e+09	1.11149e+09	1.29729e+09	1.34022e+09	1.28093e+09	1.187e+09	1.19556e+09	1.15895e+09
High	High	Master Protein	P55265	Double-stranded RNA-specific adenosine deaminase OS=Homo sapiens GN=ADAR PE=1 SV=4	0	0	57	60	933	60	1	1226	136	8.65	21361	1036.78	60	27	0	1.05615e+09	1.08116e+09	1.03135e+09	1.19778e+09	1.33472e+09	1.28063e+09	1.05688e+09	1.04732e+09	1.03458e+09
High	High	Master Protein	Q1KMD3	Heterogeneous nuclear ribonucleoprotein U-like protein 2 OS=Homo sapiens GN=HNRNPUL2 PE=1 SV=1	0	0	56	46	878	46	1	747	85.1	4.91	22691	1036.73	45	25	0	1.22429e+09	1.27511e+09	1.231e+09	1.56139e+09	1.50698e+09	1.5186e+09	1.37382e+09	1.35663e+09	1.40426e+09
High	High	Master Protein	P04844	Dolichyl-diphosphooligosaccharide--protein glycosyltransferase subunit 2 OS=Homo sapiens GN=RPN2 PE=1 SV=3	0	0	45	20	603	20	1	631	69.2	5.69	15392	1036.08	20	15	0	7.08554e+08	7.36418e+08	7.3887e+08	9.97094e+08	9.63126e+08	9.65709e+08	8.71211e+08	9.1821e+08	8.54417e+08
High	High	Master Protein	P08237	ATP-dependent 6-phosphofructokinase, muscle type OS=Homo sapiens GN=PFKM PE=1 SV=2	0	0	56	38	899	35	1	780	85.1	7.99	22024	1035.78	38	18	4	1.55757e+09	1.557e+09	1.43454e+09	1.79371e+09	1.76884e+09	1.75393e+09	1.83497e+09	1.74014e+09	1.69543e+09	Acetyl [N-Term]
High	High	Master Protein	Q14152	Eukaryotic translation initiation factor 3 subunit A OS=Homo sapiens GN=EIF3A PE=1 SV=1	0	0	65	113	1400	113	1	1382	166.5	6.79	30208	1033.31	113	33	0	4.30904e+09	4.15702e+09	4.15034e+09	5.52094e+09	5.59214e+09	5.42567e+09	5.16045e+09	5.24648e+09	5142057149
High	High	Master Protein	Q14444	Caprin-1 OS=Homo sapiens GN=CAPRIN1 PE=1 SV=2	0	0	59	27	795	27	1	709	78.3	5.25	18494	1029.26	25	16	0	1.55484e+09	1.55332e+09	1.50581e+09	2.03362e+09	2.08166e+09	2.19188e+09	1.7521e+09	1.77443e+09	1.772e+09
High	High	Master Protein	P35237	Serpin B6 OS=Homo sapiens GN=SERPINB6 PE=1 SV=3	0	0	64	20	801	19	1	376	42.6	5.27	20161	1029.12	20	14	1	1.3601e+09	1.4217e+09	1.31131e+09	1.87938e+09	1.86679e+09	1.79266e+09	1.77268e+09	1.70334e+09	1.6448e+09
High	High	Master Protein	O00567	Nucleolar protein 56 OS=Homo sapiens GN=NOP56 PE=1 SV=4	0	0	66	37	708	37	1	594	66	9.19	16974	1026.91	37	21	0	6.89441e+08	6.69833e+08	6.23401e+08	9.6548e+08	9.5339e+08	9.61813e+08	8.60954e+08	8.29391e+08	8.42228e+08
High	High	Master Protein	P82970	High mobility group nucleosome-binding domain-containing protein 5 OS=Homo sapiens GN=HMGN5 PE=1 SV=1	0	0	63	19	636	19	1	282	31.5	4.55	17308	1025.62	19	10	0	2.33e+08	2.42156e+08	2.28064e+08	2.96532e+08	2.17798e+08	3.28267e+08	2.49339e+08	2.8005e+08	2.60973e+08
High	High	Master Protein	O43242	26S proteasome non-ATPase regulatory subunit 3 OS=Homo sapiens GN=PSMD3 PE=1 SV=2	0	0	65	42	928	42	1	534	60.9	8.44	22276	1024.99	42	18	0	1.57661e+09	1.66667e+09	1.62962e+09	2.23349e+09	2.21744e+09	2.30804e+09	2.14095e+09	2.14562e+09	2.05885e+09
High	High	Master Protein	Q5VYK3	Proteasome-associated protein ECM29 homolog OS=Homo sapiens GN=ECM29 PE=1 SV=2	0	0	55	78	1076	78	1	1845	204.2	7.12	25529	1024.91	77	41	0	9.5392e+08	9.08661e+08	9.24089e+08	1.16038e+09	1.17151e+09	1.20542e+09	1.01318e+09	1.02625e+09	1.00861e+09	Acetyl [N-Term]
High	High	Master Protein	P63010	AP-2 complex subunit beta OS=Homo sapiens GN=AP2B1 PE=1 SV=1	0	0	57	52	986	30	1	937	104.5	5.38	20922	1024.49	52	31	24	2.028e+09	2.0052e+09	1.85629e+09	2.47269e+09	2.5667e+09	2.58043e+09	2.24737e+09	2.27382e+09	2.20975e+09
High	High	Master Protein	Q9UHB9	Signal recognition particle subunit SRP68 OS=Homo sapiens GN=SRP68 PE=1 SV=2	0	0	68	40	798	40	1	627	70.7	8.56	21693	1020.24	40	22	0	7.7593e+08	8.007e+08	7.65381e+08	1.04194e+09	1.05686e+09	1.03801e+09	9.40767e+08	9.607e+08	9.43996e+08
High	High	Master Protein	P08133	Annexin A6 OS=Homo sapiens GN=ANXA6 PE=1 SV=3	0	0	72	50	956	50	1	673	75.8	5.6	21726	1018.78	48	24	0	2.85641e+09	2.96752e+09	2.76721e+09	3.31633e+09	3.30252e+09	3.16569e+09	3.15027e+09	3.07528e+09	2.90717e+09
High	High	Master Protein	Q29RF7	Sister chromatid cohesion protein PDS5 homolog A OS=Homo sapiens GN=PDS5A PE=1 SV=1	0	0	50	64	802	57	1	1337	150.7	7.91	19663	1016.82	63	32	8	4.04361e+08	4.54457e+08	4.2552e+08	4.66292e+08	4.82598e+08	4.6644e+08	3.66191e+08	3.72266e+08	3.46009e+08
High	High	Master Protein	O75179	Ankyrin repeat domain-containing protein 17 OS=Homo sapiens GN=ANKRD17 PE=1 SV=3	0	0	42	76	794	59	1	2603	274.1	6.52	19078	1016.58	75	43	18	3.50192e+08	3.83977e+08	3.48692e+08	4.57624e+08	4.62523e+08	4.61702e+08	4.55447e+08	4.74867e+08	4.63621e+08
High	High	Master Protein	P21964	Catechol O-methyltransferase OS=Homo sapiens GN=COMT PE=1 SV=2	0	0	73	19	678	19	1	271	30	5.47	15401	1011.96	18	14	0	1.60804e+09	1.53707e+09	1.49126e+09	1.97401e+09	1.93862e+09	1.84288e+09	1.66024e+09	1.70169e+09	1.6224e+09
High	High	Master Protein	P52948	Nuclear pore complex protein Nup98-Nup96 OS=Homo sapiens GN=NUP98 PE=1 SV=4	0	0	47	73	857	73	1	1817	197.5	6.4	20777	1010.42	72	35	0	5.99395e+08	6.1951e+08	6.01267e+08	7.27266e+08	7.73003e+08	7.62204e+08	6.96815e+08	6.87367e+08	6.94424e+08
High	High	Master Protein	Q9NYU2	UDP-glucose:glycoprotein glucosyltransferase 1 OS=Homo sapiens GN=UGGT1 PE=1 SV=3	0	0	48	58	809	57	1	1555	177.1	5.63	17240	1007.96	56	30	1	6.06754e+08	6.00567e+08	6.06753e+08	7.7748e+08	8.00465e+08	8.10681e+08	6.43286e+08	6.44503e+08	6.11e+08
High	High	Master Protein	P19367	Hexokinase-1 OS=Homo sapiens GN=HK1 PE=1 SV=3	0	0	56	48	884	44	1	917	102.4	6.8	18705	1006.94	48	26	6	1.42499e+09	1.45311e+09	1.32923e+09	1.78642e+09	1.83425e+09	1.7727e+09	1.7134e+09	1.63215e+09	1.62296e+09	Acetyl [N-Term]
High	High	Master Protein	Q13439	Golgin subfamily A member 4 OS=Homo sapiens GN=GOLGA4 PE=1 SV=1	0	0	50	106	872	104	1	2230	261	5.39	18453	1005.99	106	54	1	3.6001e+08	3.47966e+08	3.50487e+08	4.84687e+08	4.99591e+08	5.2099e+08	4.96247e+08	4.97699e+08	4.69654e+08
High	High	Master Protein	Q14676	Mediator of DNA damage checkpoint protein 1 OS=Homo sapiens GN=MDC1 PE=1 SV=3	0	0	52	66	692	66	1	2089	226.5	5.47	14100	1001.08	65	37	0	2.56921e+08	2.88465e+08	2.63117e+08	3.15633e+08	3.55699e+08	3.47066e+08	2.33675e+08	2.28992e+08	2.16368e+08
High	High	Master Protein	P63104	14-3-3 protein zeta/delta OS=Homo sapiens GN=YWHAZ PE=1 SV=1	0	0	71	20	1176	15	1	245	27.7	4.79	26696	999.8	20	12	3	6.22435e+09	5.77443e+09	5.80445e+09	7.78713e+09	7.7288e+09	7.73188e+09	6.77674e+09	7.31775e+09	7.0732e+09
High	High	Master Protein	P61221	ATP-binding cassette sub-family E member 1 OS=Homo sapiens GN=ABCE1 PE=1 SV=1	0	0	63	39	674	39	1	599	67.3	8.34	14772	997.13	39	22	0	1.04095e+09	1.01833e+09	1.00236e+09	1.24916e+09	1.2962e+09	1271501820	1.26368e+09	1.21897e+09	1.21713e+09
High	High	Master Protein	P00505	Aspartate aminotransferase, mitochondrial OS=Homo sapiens GN=GOT2 PE=1 SV=3	0	0	73	29	769	29	1	430	47.5	9.01	16586	993.83	29	16	0	2.55145e+09	2.56731e+09	2.39356e+09	3.44939e+09	3.58666e+09	3.5202e+09	3.2697e+09	3.26344e+09	3.17953e+09
High	High	Master Protein	O15027	Protein transport protein Sec16A OS=Homo sapiens GN=SEC16A PE=1 SV=3	0	0	50	70	827	70	1	2179	233.4	5.63	19736	993.78	69	39	0	7.17406e+08	6.72672e+08	6.80309e+08	8.89479e+08	9.19649e+08	8.96817e+08	798240116	8.33709e+08	8.14188e+08
High	High	Master Protein	Q8IWJ2	GRIP and coiled-coil domain-containing protein 2 OS=Homo sapiens GN=GCC2 PE=1 SV=4	0	0	54	81	834	77	1	1684	195.8	5.14	18602	990.12	80	42	2	3.08643e+08	3.14995e+08	2.93443e+08	4.61828e+08	4.73413e+08	4.63354e+08	3.98536e+08	3.94013e+08	3.82781e+08	Acetyl [N-Term]
High	High	Master Protein	Q12904	Aminoacyl tRNA synthase complex-interacting multifunctional protein 1 OS=Homo sapiens GN=AIMP1 PE=1 SV=2	0	0	79	24	646	24	1	312	34.3	8.43	14648	988.88	24	15	0	1.21316e+09	1.18345e+09	1.13337e+09	1.53943e+09	1.63816e+09	1.54268e+09	1.47631e+09	1.54058e+09	1.51905e+09	Acetyl [N-Term]
High	High	Master Protein	Q14126	Desmoglein-2 OS=Homo sapiens GN=DSG2 PE=1 SV=2	0	0	56	41	688	41	1	1118	122.2	5.24	16001	983.29	41	22	0	5.10399e+08	4.93939e+08	4.82866e+08	5.38929e+08	5.38597e+08	5.11636e+08	5.48962e+08	5.38967e+08	5.33245e+08
High	High	Master Protein	Q06830	Peroxiredoxin-1 OS=Homo sapiens GN=PRDX1 PE=1 SV=1	0	0	74	20	981	16	1	199	22.1	8.13	19996	982.29	20	10	4	1.55266e+10	1.60424e+10	1.65492e+10	2.05547e+10	1.92163e+10	2.10608e+10	1.89342e+10	2.03151e+10	1.92261e+10
High	High	Master Protein	P46459	Vesicle-fusing ATPase OS=Homo sapiens GN=NSF PE=1 SV=3	0	0	62	42	797	41	1	744	82.5	6.95	18134	981.53	41	23	2	1.18664e+09	1.19705e+09	1.10407e+09	1.53788e+09	1.55111e+09	1.48021e+09	1.42571e+09	1.32128e+09	1.34325e+09
High	High	Master Protein	P48637	Glutathione synthetase OS=Homo sapiens GN=GSS PE=1 SV=1	0	0	69	32	712	32	1	474	52.4	5.92	15988	979.07	32	14	0	1.48978e+09	1.60889e+09	1.54168e+09	2004545538	2.20756e+09	2.17221e+09	2.05217e+09	2.10251e+09	2.00932e+09	Acetyl [N-Term]
High	High	Master Protein	Q9Y230	RuvB-like 2 OS=Homo sapiens GN=RUVBL2 PE=1 SV=3	0	0	68	30	748	30	1	463	51.1	5.64	17832	978.41	30	16	0	1.61916e+09	1.74016e+09	1.59466e+09	1.89628e+09	1.93127e+09	1.86186e+09	1.89384e+09	1.8117e+09	1.79021e+09	Acetyl [N-Term]
High	High	Master Protein	P04792	Heat shock protein beta-1 OS=Homo sapiens GN=HSPB1 PE=1 SV=2	0	0	91	22	719	22	1	205	22.8	6.4	15589	976.5	21	11	0	5.3146e+09	5.64137e+09	5.06328e+09	6.7812e+09	6.85228e+09	6873642250	5.37934e+09	5.43899e+09	5.21597e+09
High	High	Master Protein	P42166	Lamina-associated polypeptide 2, isoform alpha OS=Homo sapiens GN=TMPO PE=1 SV=2	0	0	74	38	708	27	1	694	75.4	7.66	17700	974.1	37	24	11	9.95714e+08	1.03655e+09	9.88528e+08	1.11518e+09	1.22495e+09	1.21694e+09	8.06001e+08	8.36005e+08	8.20803e+08
High	High	Master Protein	Q7KZ85	Transcription elongation factor SPT6 OS=Homo sapiens GN=SUPT6H PE=1 SV=2	0	0	52	73	750	73	1	1726	198.9	4.91	16726	969.51	71	43	0	3.29153e+08	3.35812e+08	3.27291e+08	4.02955e+08	4.09823e+08	4.00465e+08	3.68619e+08	3.79401e+08	3.62118e+08
High	High	Master Protein	P35749	Myosin-11 OS=Homo sapiens GN=MYH11 PE=1 SV=3	0	0	14	31	741	3	1	1972	227.2	5.5	18680	967.66	31	13	0				731450
High	High	Master Protein	P49915	GMP synthase [glutamine-hydrolyzing] OS=Homo sapiens GN=GMPS PE=1 SV=1	0	0	80	52	816	52	1	693	76.7	6.87	17232	966.32	51	30	0	1.40644e+09	1.41376e+09	1.36638e+09	1.61858e+09	1.66518e+09	1.62466e+09	1.46651e+09	1.44223e+09	1.39027e+09	Acetyl [N-Term]
High	High	Master Protein	P22234	Multifunctional protein ADE2 OS=Homo sapiens GN=PAICS PE=1 SV=3	0	0	68	24	752	24	1	425	47	7.23	18001	964.53	24	12	0	3.34632e+09	3.4771e+09	3248819005	3.91171e+09	4.04905e+09	3.97519e+09	3.93178e+09	3.61496e+09	3.48526e+09	Acetyl [N-Term]
High	High	Master Protein	P18669	Phosphoglycerate mutase 1 OS=Homo sapiens GN=PGAM1 PE=1 SV=2	0	0	68	17	753	17	1	254	28.8	7.18	16215	961.54	17	11	0	4.56196e+09	4.78704e+09	4.91811e+09	6.50622e+09	6.45872e+09	6.70919e+09	6.35113e+09	5.43103e+09	5.98228e+09
High	High	Master Protein	P49411	Elongation factor Tu, mitochondrial OS=Homo sapiens GN=TUFM PE=1 SV=2	0	0	70	31	803	31	1	452	49.5	7.61	17955	961.07	31	19	0	2.12322e+09	2.3628e+09	2.15576e+09	2.63462e+09	2.72035e+09	2.65085e+09	2.65721e+09	2.48144e+09	2.43211e+09
High	High	Master Protein	P27348	14-3-3 protein theta OS=Homo sapiens GN=YWHAQ PE=1 SV=1	0	0	69	18	1027	12	1	245	27.7	4.78	24893	957.92	18	8	1	2.32992e+09	2.24925e+09	2.29555e+09	2.77781e+09	2.83182e+09	2.79564e+09	3.09129e+09	2.96157e+09	2.83299e+09
High	High	Master Protein	Q15075	Early endosome antigen 1 OS=Homo sapiens GN=EEA1 PE=1 SV=2	0	0	61	80	852	80	1	1411	162.4	5.68	19185	957.65	79	43	0	8.01868e+08	7.73897e+08	7.37065e+08	9.51537e+08	9.15543e+08	9.43168e+08	8.53894e+08	8.55219e+08	8.58978e+08
High	High	Master Protein	Q9P258	Protein RCC2 OS=Homo sapiens GN=RCC2 PE=1 SV=2	0	0	72	30	660	30	1	522	56	8.78	15132	956.59	30	15	0	7.282e+08	7.51838e+08	6.74619e+08	9.71211e+08	9.86429e+08	9.45162e+08	8.29685e+08	8.18157e+08	8.52753e+08
High	High	Master Protein	P29692	Elongation factor 1-delta OS=Homo sapiens GN=EEF1D PE=1 SV=5	0	0	80	27	811	24	1	281	31.1	5.01	22146	954.07	27	19	3	4.24069e+09	4.59361e+09	4.21166e+09	4.86123e+09	5.08958e+09	5.11546e+09	4.79337e+09	4.64516e+09	4.74184e+09	Acetyl [N-Term]
High	High	Master Protein	P22307	Non-specific lipid-transfer protein OS=Homo sapiens GN=SCP2 PE=1 SV=2	0	0	62	28	661	28	1	547	59	6.89	13262	952.83	27	16	0	9.50331e+08	9.98224e+08	8.83063e+08	1.26131e+09	1.17643e+09	1.19746e+09	1.18642e+09	1.0455e+09	1.03526e+09
High	High	Master Protein	P49790	Nuclear pore complex protein Nup153 OS=Homo sapiens GN=NUP153 PE=1 SV=2	0	0	52	60	780	60	1	1475	153.8	8.73	18590	949.85	60	33	0	4.25767e+08	4.08401e+08	3.92412e+08	5.26203e+08	5.3697e+08	5.32955e+08	5.05805e+08	4.90546e+08	4.86385e+08	Acetyl [N-Term]
High	High	Master Protein	P63151	Serine/threonine-protein phosphatase 2A 55 kDa regulatory subunit B alpha isoform OS=Homo sapiens GN=PPP2R2A PE=1 SV=1	0	0	78	29	600	19	1	447	51.7	6.2	13057	947.99	29	19	9	1.18277e+09	1.18313e+09	1.0918e+09	1.36408e+09	1.39589e+09	1.40772e+09	1.34403e+09	1.32508e+09	1.33593e+09	Acetyl [N-Term]
High	High	Master Protein	P07195	L-lactate dehydrogenase B chain OS=Homo sapiens GN=LDHB PE=1 SV=2	0	0	56	20	971	18	1	334	36.6	6.05	22300	947.62	20	12	0	5.13525e+09	5.62091e+09	5.11402e+09	6.67381e+09	6.55934e+09	6369138738	5.91676e+09	5.91565e+09	5.84971e+09
High	High	None	B5ME19	Eukaryotic translation initiation factor 3 subunit C-like protein OS=Homo sapiens GN=EIF3CL PE=3 SV=1	0	0	45	42	925	41	1	914	105.4	5.64	23419	943.08	42	19	0	2.00179e+09	2.12425e+09	1.98071e+09	2.66129e+09	2.66873e+09	2.53205e+09	2.56441e+09	2.59443e+09	2.43408e+09
High	High	Master Protein	P30153	Serine/threonine-protein phosphatase 2A 65 kDa regulatory subunit A alpha isoform OS=Homo sapiens GN=PPP2R1A PE=1 SV=4	0	0	60	34	890	26	1	589	65.3	5.11	23103	942.82	33	16	8	3.47153e+09	3.55472e+09	3.34959e+09	4.08961e+09	4.20258e+09	4.13892e+09	3.82482e+09	3.87358e+09	3.87284e+09	Acetyl [N-Term]
High	High	Master Protein	O75367	Core histone macro-H2A.1 OS=Homo sapiens GN=H2AFY PE=1 SV=4	0	0	59	22	667	20	1	372	39.6	9.79	17239	940.84	21	12	2	1.96185e+09	1.89861e+09	1.89878e+09	2.69009e+09	2.60623e+09	2.60698e+09	2.33468e+09	2.29322e+09	2.17923e+09
High	High	Master Protein	O00429	Dynamin-1-like protein OS=Homo sapiens GN=DNM1L PE=1 SV=2	0	0	79	46	811	46	1	736	81.8	6.81	20649	940.68	46	24	0	7.74754e+08	8.06898e+08	7.59062e+08	1.00307e+09	1.02377e+09	1.01245e+09	9.7812e+08	9.64078e+08	9.24305e+08	Acetyl [N-Term]
High	High	Master Protein	Q9ULT8	E3 ubiquitin-protein ligase HECTD1 OS=Homo sapiens GN=HECTD1 PE=1 SV=3	0	0	43	87	830	87	1	2610	289.2	5.35	22041	939.63	85	38	0	3.76482e+08	3.72666e+08	3.5365e+08	5.14402e+08	4.92462e+08	4.75366e+08	4.89793e+08	4.95734e+08	5.41923e+08
High	High	Master Protein	Q9H0U4	Ras-related protein Rab-1B OS=Homo sapiens GN=RAB1B PE=1 SV=1	0	0	77	18	724	10	1	201	22.2	5.73	17693	939.37	18	7	7	1.89478e+09	1.95142e+09	1.9366e+09	2.1839e+09	2.31445e+09	2.18886e+09	2.21417e+09	2.16124e+09	2.11418e+09	Acetyl [N-Term]
High	High	Master Protein	Q9NR09	Baculoviral IAP repeat-containing protein 6 OS=Homo sapiens GN=BIRC6 PE=1 SV=2	0	0	33	108	813	108	1	4857	529.9	6.05	18573	939.04	104	52	0	2.7577e+08	2.79758e+08	2.72109e+08	3.45146e+08	3.64931e+08	354794901	3.36871e+08	3.45241e+08	3.17353e+08
High	High	Master Protein	Q8N163	Cell cycle and apoptosis regulator protein 2 OS=Homo sapiens GN=CCAR2 PE=1 SV=2	0	0	67	58	924	58	1	923	102.8	5.22	23048	938.28	57	30	0	1.27253e+09	1.35726e+09	1.36643e+09	1.51854e+09	1.66295e+09	1.61277e+09	1.40269e+09	1.38905e+09	1.33262e+09
High	High	Master Protein	P00338	L-lactate dehydrogenase A chain OS=Homo sapiens GN=LDHA PE=1 SV=2	0	0	69	22	1091	20	1	332	36.7	8.27	26649	938.04	22	11	2	1.30666e+10	1.23161e+10	1.26125e+10	1.60757e+10	1.5993e+10	1.62137e+10	1.09917e+10	1.11472e+10	1.08726e+10
High	High	Master Protein	P25398	40S ribosomal protein S12 OS=Homo sapiens GN=RPS12 PE=1 SV=3	0	0	74	10	785	10	1	132	14.5	7.21	22852	936.89	9	6	0	2.42382e+09	2.62962e+09	2.66605e+09	2.9266e+09	3.29805e+09	3.1305e+09	3.37584e+09	3.55099e+09	2.94539e+09	Acetyl [N-Term]
High	High	Master Protein	Q9Y2X3	Nucleolar protein 58 OS=Homo sapiens GN=NOP58 PE=1 SV=1	0	0	60	30	825	30	1	529	59.5	8.92	22304	935.92	30	17	0	7.89038e+08	8.39265e+08	7.92741e+08	1.0281e+09	1.03347e+09	1.05467e+09	9.75742e+08	9.56446e+08	9.01835e+08
High	High	Master Protein	Q16822	Phosphoenolpyruvate carboxykinase [GTP], mitochondrial OS=Homo sapiens GN=PCK2 PE=1 SV=3	0	0	69	45	815	45	1	640	70.7	7.62	18495	935.65	45	23	0	1.31661e+09	1.31933e+09	1.24844e+09	1.98514e+09	2.13363e+09	2.1399e+09	1.57785e+09	1.67391e+09	1.6067e+09
High	High	Master Protein	P04843	Dolichyl-diphosphooligosaccharide--protein glycosyltransferase subunit 1 OS=Homo sapiens GN=RPN1 PE=1 SV=1	0	0	67	37	741	37	1	607	68.5	6.38	16787	935.12	36	21	0	1.84238e+09	1.85215e+09	1.7608e+09	2.27322e+09	2.31946e+09	2.30129e+09	2.10048e+09	2.00808e+09	1.99231e+09
High	High	Master Protein	P26641	Elongation factor 1-gamma OS=Homo sapiens GN=EEF1G PE=1 SV=3	0	0	68	33	862	33	1	437	50.1	6.67	17711	934.97	32	15	0	5.98506e+09	6.35189e+09	6.00172e+09	7.5237e+09	7.91737e+09	8.01914e+09	7.71655e+09	7.99096e+09	7.41457e+09	Acetyl [N-Term]
High	High	Master Protein	P52209	6-phosphogluconate dehydrogenase, decarboxylating OS=Homo sapiens GN=PGD PE=1 SV=3	0	0	66	31	761	31	1	483	53.1	7.23	14976	933.38	31	17	0	2.42295e+09	2.50971e+09	2.38666e+09	3.10109e+09	3.09268e+09	3.1212e+09	2.80902e+09	2.79179e+09	2.70393e+09
High	High	Master Protein	P46060	Ran GTPase-activating protein 1 OS=Homo sapiens GN=RANGAP1 PE=1 SV=1	0	0	67	36	768	36	1	587	63.5	4.68	19738	928.33	35	25	0	1.14755e+09	1.27792e+09	1.23835e+09	1.45646e+09	1.57268e+09	1.55558e+09	1.2865e+09	1.24587e+09	1.24118e+09
High	High	Master Protein	Q6PKG0	La-related protein 1 OS=Homo sapiens GN=LARP1 PE=1 SV=2	0	0	62	66	884	59	1	1096	123.4	8.82	19482	927.43	64	30	8	1.16929e+09	1.25471e+09	1.1948e+09	1.57147e+09	1.54935e+09	1.56585e+09	1.42087e+09	1.48813e+09	1.43099e+09	Acetyl [N-Term]
High	High	Master Protein	A5YKK6	CCR4-NOT transcription complex subunit 1 OS=Homo sapiens GN=CNOT1 PE=1 SV=2	0	0	47	92	851	92	1	2376	266.8	7.11	17896	925.84	91	52	0	5.67394e+08	6.14965e+08	6.00831e+08	7.42185e+08	7.67719e+08	7.65315e+08	7.34644e+08	7.29408e+08	7.12976e+08
High	High	Master Protein	Q9UPQ0	LIM and calponin homology domains-containing protein 1 OS=Homo sapiens GN=LIMCH1 PE=1 SV=4	0	0	69	66	896	65	1	1083	121.8	6.47	22653	922.4	66	33	0	6.77058e+08	6.75158e+08	6.66993e+08	1.25143e+09	1.30254e+09	1.28777e+09	1.22669e+09	1.218e+09	1.2263e+09	Acetyl [N-Term]
High	High	Master Protein	Q92538	Golgi-specific brefeldin A-resistance guanine nucleotide exchange factor 1 OS=Homo sapiens GN=GBF1 PE=1 SV=2	0	0	47	65	834	65	1	1859	206.3	5.73	18212	920.68	64	39	0	4.44214e+08	4.40725e+08	4.09023e+08	5.2629e+08	5.57159e+08	5.33806e+08	5.6036e+08	5.43612e+08	5.24209e+08
High	High	Master Protein	P61011	Signal recognition particle 54 kDa protein OS=Homo sapiens GN=SRP54 PE=1 SV=1	0	0	60	29	750	29	1	504	55.7	8.75	17654	918.98	27	20	0	8.70689e+08	8.13479e+08	8.04129e+08	1.12634e+09	1.13381e+09	1.15588e+09	1.03533e+09	1.06997e+09	1.03968e+09
High	High	Master Protein	Q9H4A4	Aminopeptidase B OS=Homo sapiens GN=RNPEP PE=1 SV=2	0	0	69	38	729	38	1	650	72.5	5.74	16605	918.14	38	27	0	1.5912e+09	1.60812e+09	1.47853e+09	1.93357e+09	1.99606e+09	1.99323e+09	1.69971e+09	1.62983e+09	1.58892e+09	Acetyl [N-Term]
High	High	Master Protein	Q02218	2-oxoglutarate dehydrogenase, mitochondrial OS=Homo sapiens GN=OGDH PE=1 SV=3	0	0	60	54	835	54	1	1023	115.9	6.86	19534	917.71	54	30	0	7.31397e+08	7.58127e+08	7.32603e+08	9.34903e+08	9.69669e+08	9.55203e+08	8.92488e+08	9.10907e+08	8.88166e+08
High	High	Master Protein	P12532	Creatine kinase U-type, mitochondrial OS=Homo sapiens GN=CKMT1A PE=1 SV=1	0	0	51	21	652	21	1	417	47	8.34	13859	916.56	20	11	0	1.95848e+09	2.01986e+09	1.90524e+09	2.57017e+09	2.50639e+09	2444204690	2.41314e+09	2.36877e+09	2.2963e+09
High	High	Master Protein	P46777	60S ribosomal protein L5 OS=Homo sapiens GN=RPL5 PE=1 SV=3	0	0	59	17	800	17	1	297	34.3	9.72	17652	910.04	17	10	0	3.49234e+09	3.63918e+09	3.23682e+09	4.13046e+09	4.36624e+09	4.14153e+09	4.22099e+09	3.95279e+09	4.06432e+09
High	High	Master Protein	Q9H3U1	Protein unc-45 homolog A OS=Homo sapiens GN=UNC45A PE=1 SV=1	0	0	61	53	889	53	1	944	103	6.07	21848	906.54	52	29	0	9.40396e+08	9.13009e+08	8.62825e+08	1.16491e+09	1.19352e+09	1.17373e+09	1.17083e+09	1.18215e+09	1.1794e+09
High	High	Master Protein	Q8WVM8	Sec1 family domain-containing protein 1 OS=Homo sapiens GN=SCFD1 PE=1 SV=4	0	0	61	34	723	34	1	642	72.3	6.27	18641	900.56	34	18	0	5.6849e+08	5.47806e+08	5.16586e+08	7.22083e+08	7.6257e+08	7.26765e+08	631988749	6.52762e+08	6.16231e+08	Acetyl [N-Term]
High	High	Master Protein	P11047	Laminin subunit gamma-1 OS=Homo sapiens GN=LAMC1 PE=1 SV=3	0	0	57	67	773	67	1	1609	177.5	5.12	18934	898.72	67	40	0	2.99577e+08	2.85096e+08	2.88416e+08	5.04151e+08	5.55162e+08	5.59053e+08	5.61668e+08	5.74734e+08	5.48547e+08
High	High	Master Protein	P07737	Profilin-1 OS=Homo sapiens GN=PFN1 PE=1 SV=2	0	0	93	12	1170	12	1	140	15	8.27	32042	898.26	12	9	0	8.42826e+09	7.68963e+09	7.87977e+09	9.55622e+09	9.45229e+09	9.5025e+09	8.87888e+09	1.02222e+10	9.0008e+09	Acetyl [N-Term]
High	High	Master Protein	Q6P996	Pyridoxal-dependent decarboxylase domain-containing protein 1 OS=Homo sapiens GN=PDXDC1 PE=1 SV=2	0	0	67	40	683	40	1	788	86.7	5.38	14639	897.29	40	23	0	7.01857e+08	6.99844e+08	6.59011e+08	8.74972e+08	9.01275e+08	8.77113e+08	8.44174e+08	8.60175e+08	8.07161e+08
High	High	Master Protein	P57721	Poly(rC)-binding protein 3 OS=Homo sapiens GN=PCBP3 PE=2 SV=2	0	0	26	9	583	2	1	371	39.4	8.07	12472	895.9	9	3	0	9.83709e+07	1.32907e+08	1.18875e+08	1.27693e+08	1.63318e+08	1.55087e+08	2.12754e+08	1.30465e+08	1.25114e+08
High	High	Master Protein	Q13185	Chromobox protein homolog 3 OS=Homo sapiens GN=CBX3 PE=1 SV=4	0	0	62	10	609	8	1	183	20.8	5.33	14782	894.92	10	7	0	1.21914e+09	1.21879e+09	1.13393e+09	1.29701e+09	1.3991e+09	1.30471e+09	1.22685e+09	1.18069e+09	1.23632e+09
High	High	Master Protein	O60716	Catenin delta-1 OS=Homo sapiens GN=CTNND1 PE=1 SV=1	0	0	62	55	822	55	1	968	108.1	6.23	20913	893.73	55	30	0	1.01739e+09	1.07677e+09	1.03902e+09	1.4965e+09	1.57523e+09	1.51976e+09	1.19035e+09	1.21664e+09	1.13693e+09
High	High	Master Protein	Q07021	Complement component 1 Q subcomponent-binding protein, mitochondrial OS=Homo sapiens GN=C1QBP PE=1 SV=1	0	0	43	9	596	9	1	282	31.3	4.84	15287	892.57	8	8	0	1.54768e+09	1.42939e+09	1.58001e+09	1.9698e+09	1.95858e+09	2.07364e+09	1.98524e+09	1.85213e+09	1.90729e+09
High	High	Master Protein	Q9Y617	Phosphoserine aminotransferase OS=Homo sapiens GN=PSAT1 PE=1 SV=2	0	0	72	22	851	22	1	370	40.4	7.66	20468	891.55	22	16	0	2.21252e+09	2.17004e+09	2.19288e+09	3.72774e+09	3.81925e+09	3.78115e+09	3.8104e+09	3.82641e+09	3.66242e+09
High	High	None	Q3ZCM7	Tubulin beta-8 chain OS=Homo sapiens GN=TUBB8 PE=1 SV=2	0	0	24	10	1739	0	1	444	49.7	4.89	50190	890.5	10	7	0	1.54686e+10	1.61225e+10	1.56402e+10	1.85358e+10	1.8545e+10	1.94311e+10	1.81618e+10	1.72374e+10	1.60492e+10
High	High	Master Protein	P28331	NADH-ubiquinone oxidoreductase 75 kDa subunit, mitochondrial OS=Homo sapiens GN=NDUFS1 PE=1 SV=3	0	0	70	39	654	39	1	727	79.4	6.23	14379	887.43	39	24	0	5.76056e+08	5.54067e+08	5.67058e+08	7.08602e+08	7.89073e+08	7.8047e+08	6.20492e+08	6.68186e+08	6.45625e+08
High	High	Master Protein	P13693	Translationally-controlled tumor protein OS=Homo sapiens GN=TPT1 PE=1 SV=1	0	0	73	10	554	10	1	172	19.6	4.93	13026	885.04	10	7	0	2.00746e+09	2.12225e+09	2.0531e+09	2.70923e+09	2.91521e+09	2.82819e+09	2.39301e+09	2.45096e+09	2.39766e+09
High	High	Master Protein	Q15436	Protein transport protein Sec23A OS=Homo sapiens GN=SEC23A PE=1 SV=2	0	0	57	32	673	29	1	765	86.1	7.08	14697	881.46	32	19	0	5.26696e+08	6.14711e+08	5.79605e+08	7.56114e+08	7.21882e+08	7.31439e+08	7.3742e+08	7.36184e+08	7.42947e+08	Acetyl [N-Term]
High	High	Master Protein	Q9BWD1	Acetyl-CoA acetyltransferase, cytosolic OS=Homo sapiens GN=ACAT2 PE=1 SV=2	0	0	71	20	521	20	1	397	41.3	6.92	10234	881.3	20	13	0	8.20073e+08	8.1088e+08	7.69079e+08	9.90829e+08	1.06203e+09	1.0446e+09	9.06767e+08	8.97288e+08	8.59415e+08	Acetyl [N-Term]
High	High	Master Protein	Q53SF7	Cordon-bleu protein-like 1 OS=Homo sapiens GN=COBLL1 PE=1 SV=2	0	0	68	65	654	65	1	1204	131.7	6.67	13656	881.24	63	42	0	1.9341e+08	1.92538e+08	1.85717e+08	2.90061e+08	2.89175e+08	2.8637e+08	2.53408e+08	2.43722e+08	2.45785e+08
High	High	Master Protein	P54105	Methylosome subunit pICln OS=Homo sapiens GN=CLNS1A PE=1 SV=1	0	0	67	9	456	9	1	237	26.2	4.11	11351	881.22	9	7	0	1.57901e+08	1.66552e+08	1.69444e+08	1.83395e+08	1.82584e+08	1.73909e+08	1.7832e+08	1.86602e+08	1.85792e+08
High	High	Master Protein	P24928	DNA-directed RNA polymerase II subunit RPB1 OS=Homo sapiens GN=POLR2A PE=1 SV=2	0	0	45	75	789	75	1	1970	217	7.37	17589	879.64	74	41	0	3.55985e+08	3.69076e+08	3.45122e+08	4.6849e+08	4.65398e+08	4.48198e+08	3.82472e+08	3.73823e+08	3.68543e+08	Acetyl [N-Term]
High	High	Master Protein	P40763	Signal transducer and activator of transcription 3 OS=Homo sapiens GN=STAT3 PE=1 SV=2	0	0	59	35	655	35	1	770	88	6.3	16476	876.89	35	22	0	5.33491e+08	5.74912e+08	5.22524e+08	7.99145e+08	8.40487e+08	8.1995e+08	1.02074e+09	1.04447e+09	9.98412e+08	Acetyl [N-Term]
High	High	Master Protein	P34931	Heat shock 70 kDa protein 1-like OS=Homo sapiens GN=HSPA1L PE=1 SV=2	0	0	30	15	726	2	1	641	70.3	6.02	18265	876.27	15	8	0	3.23143e+06	3466409	3.15026e+06	5.77847e+06	4742728	5.25948e+06	3.1435e+06	4786940	4600515
High	High	Master Protein	Q92499	ATP-dependent RNA helicase DDX1 OS=Homo sapiens GN=DDX1 PE=1 SV=2	0	0	63	47	824	47	1	740	82.4	7.23	18879	875.73	47	21	0	1.53473e+09	1.55083e+09	1.46671e+09	1.9163e+09	1.96758e+09	1.89092e+09	1.85422e+09	1.81148e+09	1.83151e+09
High	High	Master Protein	P51610	Host cell factor 1 OS=Homo sapiens GN=HCFC1 PE=1 SV=2	0	0	39	56	786	56	1	2035	208.6	7.46	18562	875.33	55	31	0	6.45882e+08	6.70418e+08	6.26203e+08	8.10973e+08	8.2539e+08	8.22946e+08	8.16193e+08	8.30334e+08	7.79159e+08	Acetyl [N-Term]
High	High	Master Protein	Q93009	Ubiquitin carboxyl-terminal hydrolase 7 OS=Homo sapiens GN=USP7 PE=1 SV=2	0	0	64	63	848	63	1	1102	128.2	5.55	17989	875.07	62	31	0	1021832790	1.08259e+09	9.9963e+08	1.2468e+09	1.30329e+09	1.29387e+09	1.18271e+09	1.13471e+09	1.09526e+09	Acetyl [N-Term]
High	High	Master Protein	O00267	Transcription elongation factor SPT5 OS=Homo sapiens GN=SUPT5H PE=1 SV=1	0	0	54	48	674	48	1	1087	120.9	5.06	14795	874.86	47	26	0	4.56499e+08	4.94889e+08	4.58823e+08	5.79999e+08	5.86508e+08	6.03592e+08	552367588	5.49379e+08	5.11078e+08
High	High	Master Protein	Q9UBB4	Ataxin-10 OS=Homo sapiens GN=ATXN10 PE=1 SV=1	0	0	67	27	651	27	1	475	53.5	5.25	16339	874.82	26	17	0	9.65233e+08	9.51299e+08	9.30235e+08	1.11055e+09	1.21076e+09	1.20262e+09	1.25631e+09	1.28183e+09	1.2416e+09
High	High	Master Protein	O76094	Signal recognition particle subunit SRP72 OS=Homo sapiens GN=SRP72 PE=1 SV=3	0	0	64	37	707	37	1	671	74.6	9.26	17700	872.84	36	16	0	8.9444e+08	9.02159e+08	8.13578e+08	1.10653e+09	1.10781e+09	1.08256e+09	1.13156e+09	1.05719e+09	1.0492e+09	Acetyl [N-Term]
High	High	Master Protein	Q8IY81	pre-rRNA processing protein FTSJ3 OS=Homo sapiens GN=FTSJ3 PE=1 SV=2	0	0	58	40	696	40	1	847	96.5	8.4	17584	869.91	40	25	0	4.63801e+08	4.54634e+08	4.33242e+08	6.04516e+08	6.03805e+08	6.009e+08	5.7174e+08	5.82158e+08	5.35953e+08
High	High	Master Protein	P28074	Proteasome subunit beta type-5 OS=Homo sapiens GN=PSMB5 PE=1 SV=3	0	0	66	16	623	16	1	263	28.5	6.92	15573	869.03	16	12	0	1.14806e+09	1.14039e+09	1.07023e+09	1.42833e+09	1.41109e+09	1.44441e+09	1.53708e+09	1.58316e+09	1.60056e+09	Acetyl [N-Term]
High	High	Master Protein	O75694	Nuclear pore complex protein Nup155 OS=Homo sapiens GN=NUP155 PE=1 SV=1	0	0	46	45	731	45	1	1391	155.1	6.16	16595	867.85	45	24	0	6.69075e+08	6.57351e+08	6.45031e+08	7.69735e+08	7.91469e+08	7.78445e+08	6.02593e+08	6.34285e+08	5.65531e+08
High	High	Master Protein	Q01518	Adenylyl cyclase-associated protein 1 OS=Homo sapiens GN=CAP1 PE=1 SV=5	0	0	59	28	760	27	1	475	51.9	8.06	17640	867.33	28	14	1	1.61836e+09	1.60018e+09	1.45798e+09	1.92981e+09	1.99643e+09	1.98152e+09	1.90396e+09	1.90623e+09	1.81936e+09	Acetyl [N-Term]
High	High	Master Protein	P51116	Fragile X mental retardation syndrome-related protein 2 OS=Homo sapiens GN=FXR2 PE=1 SV=2	0	0	61	38	656	34	1	673	74.2	6.23	18624	863.71	37	23	5	5.62637e+08	5.77045e+08	5.59027e+08	6.6571e+08	7.23231e+08	6.77107e+08	6.32053e+08	6.40589e+08	6.25418e+08
High	High	Master Protein	O00232	26S proteasome non-ATPase regulatory subunit 12 OS=Homo sapiens GN=PSMD12 PE=1 SV=3	0	0	53	21	676	21	1	456	52.9	7.65	16186	862.37	21	14	0	1.09446e+09	1.04207e+09	1.02898e+09	1.44351e+09	1.57374e+09	1.4659e+09	1.36559e+09	1.37215e+09	1.43083e+09
High	High	Master Protein	P49589	Cysteine--tRNA ligase, cytoplasmic OS=Homo sapiens GN=CARS PE=1 SV=3	0	0	62	44	791	44	1	748	85.4	6.76	19499	860	44	27	0	6.55023e+08	7.22517e+08	6.77188e+08	1.07669e+09	1.14973e+09	1.1156e+09	1.09539e+09	1.17041e+09	1.08388e+09
High	High	Master Protein	Q9BUF5	Tubulin beta-6 chain OS=Homo sapiens GN=TUBB6 PE=1 SV=1	0	0	43	15	1007	3	1	446	49.8	4.88	20477	859.33	15	11	0	2.76799e+07	3.05051e+07	2.78867e+07	4.45579e+07	4.04551e+07	4.29558e+07	4.0849e+07	4.02095e+07	3.57491e+07
High	High	Master Protein	P55327	Tumor protein D52 OS=Homo sapiens GN=TPD52 PE=1 SV=2	0	0	56	10	533	10	1	224	24.3	4.83	13983	859.14	10	9	0	1.12962e+09	1.12412e+09	1.13465e+09	1.49215e+09	1.51097e+09	1.61511e+09	1.54525e+09	1.57998e+09	1.54619e+09
High	High	Master Protein	Q16891	MICOS complex subunit MIC60 OS=Homo sapiens GN=IMMT PE=1 SV=1	0	0	64	52	746	52	1	758	83.6	6.48	16645	857.58	50	26	0	7.4731e+08	7.55904e+08	7.39554e+08	9.41074e+08	9.46424e+08	9.27466e+08	7.03488e+08	7.01887e+08	6.94116e+08
High	High	Master Protein	Q15424	Scaffold attachment factor B1 OS=Homo sapiens GN=SAFB PE=1 SV=4	0	0	51	47	833	32	1	915	102.6	5.47	20025	857.28	46	25	15	1.13648e+09	1.05799e+09	1.0665e+09	1.49701e+09	1.49776e+09	1.46992e+09	1.39863e+09	1.36304e+09	1.33632e+09	Acetyl [N-Term]
High	High	Master Protein	P67775	Serine/threonine-protein phosphatase 2A catalytic subunit alpha isoform OS=Homo sapiens GN=PPP2CA PE=1 SV=1	0	0	64	16	574	1	1	309	35.6	5.54	12251	857.02	16	11	0	9.94967e+07	9.45331e+07	8.18819e+07	1.05015e+08	123938405	119751537	103399645	108951250	1.04493e+08
High	High	Master Protein	Q09028	Histone-binding protein RBBP4 OS=Homo sapiens GN=RBBP4 PE=1 SV=3	0	0	71	22	607	15	1	425	47.6	4.89	14880	855.49	22	13	0	8.25552e+08	8.53407e+08	8.56498e+08	1.05066e+09	1.07812e+09	1.10777e+09	9.65126e+08	9.59574e+08	8.77231e+08
High	High	Master Protein	P52907	F-actin-capping protein subunit alpha-1 OS=Homo sapiens GN=CAPZA1 PE=1 SV=3	0	0	76	15	653	12	1	286	32.9	5.69	16076	852.36	14	10	3	1.23836e+09	1.15105e+09	1.05564e+09	1.53948e+09	1.66996e+09	1.551e+09	1.39291e+09	1.38849e+09	1.32874e+09	Acetyl [N-Term]
High	High	Master Protein	P13489	Ribonuclease inhibitor OS=Homo sapiens GN=RNH1 PE=1 SV=2	0	0	71	21	559	21	1	461	49.9	4.82	15178	851.82	21	15	0	6.09443e+08	5.92697e+08	5.71124e+08	8.51226e+08	8.64146e+08	8.62202e+08	8.55002e+08	8.63589e+08	8.33363e+08	Acetyl [N-Term]
High	High	Master Protein	P04040	Catalase OS=Homo sapiens GN=CAT PE=1 SV=3	0	0	71	33	670	33	1	527	59.7	7.39	16285	846.69	32	20	0	1.22234e+09	1.24915e+09	1.21659e+09	1.56887e+09	1.72083e+09	1.66826e+09	1.25679e+09	1.25011e+09	1.23525e+09	Acetyl [N-Term]
High	High	Master Protein	P02751	Fibronectin OS=Homo sapiens GN=FN1 PE=1 SV=4	0	0	41	68	727	68	1	2386	262.5	5.71	16224	846.63	68	36	0	2.99173e+08	2.99435e+08	3.00936e+08	4.22407e+08	4.30499e+08	4.24803e+08	2.75121e+08	2.56485e+08	2.41589e+08
High	High	Master Protein	P54920	Alpha-soluble NSF attachment protein OS=Homo sapiens GN=NAPA PE=1 SV=3	0	0	83	22	629	19	1	295	33.2	5.36	15139	840.91	22	16	3	8.30251e+08	7.43497e+08	7.26396e+08	1.10096e+09	1.12766e+09	1.091e+09	1.0826e+09	1.12838e+09	1.02566e+09
High	High	Master Protein	P22059	Oxysterol-binding protein 1 OS=Homo sapiens GN=OSBP PE=1 SV=1	0	0	56	43	775	40	1	807	89.4	7.3	17565	838.08	42	28	5	8.76397e+08	9.43521e+08	9.61854e+08	1.35971e+09	1.35628e+09	1.32794e+09	1.19735e+09	1.24053e+09	1.21049e+09
High	High	Master Protein	O43143	Pre-mRNA-splicing factor ATP-dependent RNA helicase DHX15 OS=Homo sapiens GN=DHX15 PE=1 SV=2	0	0	58	48	951	47	1	795	90.9	7.46	21129	837.87	48	27	2	1.67112e+09	1.72855e+09	1.65476e+09	2.01857e+09	2.0655e+09	2.11078e+09	1.95618e+09	1.94697e+09	1.80401e+09
High	High	Master Protein	Q9NTJ3	Structural maintenance of chromosomes protein 4 OS=Homo sapiens GN=SMC4 PE=1 SV=2	0	0	53	67	784	67	1	1288	147.1	6.79	18307	836.94	64	39	0	9.9701e+08	9.62105e+08	9.7161e+08	1.00499e+09	1.05757e+09	9.93678e+08	7.79783e+08	8.18977e+08	8.20414e+08
High	High	Master Protein	Q13310	Polyadenylate-binding protein 4 OS=Homo sapiens GN=PABPC4 PE=1 SV=1	0	0	69	35	872	22	1	644	70.7	9.26	21684	834	35	14	0	7.29266e+08	7.87347e+08	7.92664e+08	8.30443e+08	1.05752e+09	9.9882e+08	9.21661e+08	9.8936e+08	9.67972e+08
High	High	Master Protein	Q14240	Eukaryotic initiation factor 4A-II OS=Homo sapiens GN=EIF4A2 PE=1 SV=2	0	0	65	27	770	10	1	407	46.4	5.48	19467	830.89	27	12	0	1.95088e+08	1.90445e+08	1.74862e+08	2.56776e+08	2.85558e+08	296589150	2.40617e+08	2.57531e+08	270161319	Acetyl [N-Term]
High	High	Master Protein	O00231	26S proteasome non-ATPase regulatory subunit 11 OS=Homo sapiens GN=PSMD11 PE=1 SV=3	0	0	71	28	717	28	1	422	47.4	6.48	16236	829.97	28	15	0	1.68617e+09	1.70923e+09	1.54924e+09	2.02335e+09	2.02157e+09	1.9437e+09	1.92826e+09	1.9504e+09	1.87616e+09	Acetyl [N-Term]
High	High	Master Protein	P50579	Methionine aminopeptidase 2 OS=Homo sapiens GN=METAP2 PE=1 SV=1	0	0	68	26	530	26	1	478	52.9	5.82	14762	827.86	26	18	0	1.22302e+08	1.15291e+08	1.25503e+08	2.39643e+08	2.22147e+08	2.33116e+08	3.06717e+08	3.0729e+08	3.2618e+08	Acetyl [N-Term]
High	High	Master Protein	Q99873	Protein arginine N-methyltransferase 1 OS=Homo sapiens GN=PRMT1 PE=1 SV=2	0	0	70	23	714	23	1	361	41.5	5.43	16266	827.17	23	16	0	1.88839e+09	1.96242e+09	1.83109e+09	2.22211e+09	2.4221e+09	2.41356e+09	2.34986e+09	2.21206e+09	2.20164e+09
High	High	None	A6NNZ2	Tubulin beta-8 chain-like protein LOC260334 OS=Homo sapiens PE=1 SV=1	0	0	21	9	1686	0	2	444	49.5	4.86	49304	827.06	9	6	0	1.45757e+10	1.51166e+10	1.47533e+10	1.75222e+10	1.7456e+10	1.829e+10	1.71968e+10	1.61974e+10	1.51142e+10
High	High	Master Protein	O14497	AT-rich interactive domain-containing protein 1A OS=Homo sapiens GN=ARID1A PE=1 SV=3	0	0	42	58	635	56	1	2285	241.9	6.7	13773	824.55	54	40	2	1.88288e+08	1.75267e+08	1.86818e+08	2.16565e+08	2.16182e+08	2.24309e+08	1.87417e+08	1.85852e+08	1.76809e+08	Acetyl [N-Term]
High	High	Master Protein	P50502	Hsc70-interacting protein OS=Homo sapiens GN=ST13 PE=1 SV=2	0	0	48	19	681	3	1	369	41.3	5.27	14362	823.05	19	10	17	2.22553e+09	2.30392e+09	2.35135e+09	2.93721e+09	2.80513e+09	2.88401e+09	2.92846e+09	2.79556e+09	2.75082e+09
High	High	Master Protein	Q5JSZ5	Protein PRRC2B OS=Homo sapiens GN=PRRC2B PE=1 SV=2	0	0	42	66	715	63	1	2229	242.8	8.34	17917	821.24	64	35	0	2.04318e+08	1.9994e+08	1.93868e+08	2.71251e+08	2.79529e+08	2.70574e+08	2.38401e+08	2.39025e+08	2.39272e+08
High	High	Master Protein	Q16531	DNA damage-binding protein 1 OS=Homo sapiens GN=DDB1 PE=1 SV=1	0	0	51	53	886	53	1	1140	126.9	5.26	19784	821.17	53	26	0	1.07867e+09	1.15081e+09	1.08841e+09	1.33894e+09	1.3474e+09	1.31094e+09	1.38309e+09	1.41687e+09	1.36869e+09	Acetyl [N-Term]
High	High	Master Protein	P27694	Replication protein A 70 kDa DNA-binding subunit OS=Homo sapiens GN=RPA1 PE=1 SV=2	0	0	62	38	762	38	1	616	68.1	7.21	19188	820.96	38	18	0	1.26003e+09	1.3732e+09	1.36991e+09	1.52543e+09	1.66831e+09	1.64161e+09	1.29099e+09	1.35134e+09	1.27503e+09	Acetyl [N-Term; N-Term]
High	High	Master Protein	P47897	Glutamine--tRNA ligase OS=Homo sapiens GN=QARS PE=1 SV=1	0	0	68	52	753	51	1	775	87.7	7.15	17714	820.03	51	24	0	1.67773e+09	1.62031e+09	1.56368e+09	1.99991e+09	1.98738e+09	1.98152e+09	1.9258e+09	1.91224e+09	1.90348e+09	Acetyl [N-Term]
High	High	Master Protein	Q15019	Septin-2 OS=Homo sapiens GN=SEPT2 PE=1 SV=1	0	0	71	23	580	23	1	361	41.5	6.6	12999	819.21	23	15	0	7.91652e+08	8.79759e+08	7.83962e+08	1.03209e+09	9.86401e+08	9.84597e+08	9.07948e+08	9.0049e+08	8.92608e+08
High	High	Master Protein	P50570	Dynamin-2 OS=Homo sapiens GN=DNM2 PE=1 SV=2	0	0	55	45	647	31	1	870	98	7.44	14287	819.06	45	22	15	6.29697e+08	6.26498e+08	6.06411e+08	7.4281e+08	7.82359e+08	7.53834e+08	7.22811e+08	7.49746e+08	6.98955e+08
High	High	Master Protein	P62714	Serine/threonine-protein phosphatase 2A catalytic subunit beta isoform OS=Homo sapiens GN=PPP2CB PE=1 SV=1	0	0	66	17	562	2	1	309	35.6	5.43	12219	818.59	17	11	20	1.34921e+09	1.19563e+09	1.23108e+09	1.53998e+09	1.54967e+09	1.56431e+09	1.49665e+09	1.47906e+09	1.44431e+09
High	High	Master Protein	Q9UHD9	Ubiquilin-2 OS=Homo sapiens GN=UBQLN2 PE=1 SV=2	0	0	40	18	531	12	1	624	65.7	5.22	12812	817.86	18	13	5	5.94246e+08	6.47321e+08	6.38795e+08	7.53795e+08	7.9206e+08	7.68614e+08	6.92634e+08	7.26871e+08	6.66907e+08	Acetyl [N-Term]
High	High	Master Protein	Q96A49	Synapse-associated protein 1 OS=Homo sapiens GN=SYAP1 PE=1 SV=1	0	0	60	23	437	23	1	352	39.9	4.53	10556	816.51	23	14	0	2.80645e+08	2.95732e+08	2.92357e+08	3.88237e+08	4.12257e+08	4.18021e+08	4.21681e+08	4.12787e+08	4.23288e+08
High	High	Master Protein	Q15459	Splicing factor 3A subunit 1 OS=Homo sapiens GN=SF3A1 PE=1 SV=1	0	0	57	43	717	43	1	793	88.8	5.22	15452	814.84	43	24	0	1.20327e+09	1.11805e+09	1.07624e+09	1.35498e+09	1.38831e+09	1.34813e+09	1.07817e+09	1.10984e+09	1.05374e+09
High	High	Master Protein	Q9UPQ9	Trinucleotide repeat-containing gene 6B protein OS=Homo sapiens GN=TNRC6B PE=1 SV=4	0	0	54	62	602	62	1	1833	193.9	6.76	16119	812.51	59	42	0	1.2717e+08	1.27463e+08	1.24904e+08	1.65756e+08	1.67048e+08	1.70759e+08	1.154e+08	1.26518e+08	1.25724e+08
High	High	Master Protein	Q14257	Reticulocalbin-2 OS=Homo sapiens GN=RCN2 PE=1 SV=1	0	0	65	19	544	19	1	317	36.9	4.4	11736	810.02	19	11	0	7.7945e+08	7.71959e+08	8.46102e+08	1.05099e+09	1.06269e+09	1.05862e+09	1.01116e+09	1.13199e+09	1.05985e+09
High	High	Master Protein	Q86XP3	ATP-dependent RNA helicase DDX42 OS=Homo sapiens GN=DDX42 PE=1 SV=1	0	0	62	43	640	43	1	938	102.9	7.02	15508	809.65	42	26	0	4.94013e+08	5.08438e+08	5.05987e+08	6.1495e+08	6.44069e+08	6.36293e+08	5.79132e+08	5.7489e+08	5.56148e+08
High	High	Master Protein	P17980	26S protease regulatory subunit 6A OS=Homo sapiens GN=PSMC3 PE=1 SV=3	0	0	71	30	679	30	1	439	49.2	5.24	15563	809.23	30	16	0	1.09514e+09	1.0663e+09	1.00611e+09	1.35151e+09	1.46525e+09	1.32939e+09	1.23046e+09	1.2045e+09	1.18751e+09	Acetyl [N-Term]
High	High	Master Protein	Q6XQN6	Nicotinate phosphoribosyltransferase OS=Homo sapiens GN=NAPRT PE=1 SV=2	0	0	76	30	577	30	1	538	57.5	5.68	13570	807.52	30	20	0	5.65893e+08	5.75314e+08	6.09816e+08	8.00198e+08	9.02661e+08	8.23327e+08	7.78278e+08	8.02329e+08	7.4827e+08	Acetyl [N-Term]
High	High	Master Protein	O95071	E3 ubiquitin-protein ligase UBR5 OS=Homo sapiens GN=UBR5 PE=1 SV=2	0	0	38	84	772	84	1	2799	309.2	5.85	17066	807.43	83	37	0	3.05429e+08	2.85966e+08	2.82658e+08	3.83689e+08	3.76819e+08	3.72754e+08	3.5077e+08	3.43938e+08	3.4704e+08	Acetyl [N-Term]
High	High	Master Protein	Q5JPE7	Nodal modulator 2 OS=Homo sapiens GN=NOMO2 PE=1 SV=1	0	0	54	47	699	3	1	1267	139.4	5.76	15604	807.3	46	29	45	520249129	5.67777e+08	5.1773e+08	6.78854e+08	6.98384e+08	6.83282e+08	6.78392e+08	6.85173e+08	6.71951e+08
High	High	Master Protein	P62979	Ubiquitin-40S ribosomal protein S27a OS=Homo sapiens GN=RPS27A PE=1 SV=2	0	0	53	8	1042	3	1	156	18	9.64	25038	807.26	8	6	5	1.5672e+10	1.07028e+10	1.43899e+10	1.53074e+10	1.54239e+10	1.55858e+10	1.2814e+10	1.39053e+10	1.30207e+10
High	High	Master Protein	Q8NE71	ATP-binding cassette sub-family F member 1 OS=Homo sapiens GN=ABCF1 PE=1 SV=2	0	0	49	36	692	36	1	845	95.9	6.8	16287	805.2	35	19	0	5.97176e+08	5.81259e+08	5.73666e+08	7.56335e+08	7.60139e+08	7.39096e+08	6.8055e+08	6.99798e+08	6.67279e+08
High	High	Master Protein	O00299	Chloride intracellular channel protein 1 OS=Homo sapiens GN=CLIC1 PE=1 SV=4	0	0	77	14	539	14	1	241	26.9	5.17	11619	801.55	14	10	0	1.31242e+09	1.54358e+09	1.38753e+09	1.96258e+09	1.93161e+09	1.87966e+09	1.70447e+09	1.824e+09	1.78072e+09	Acetyl [N-Term]
High	High	Master Protein	Q15067	Peroxisomal acyl-coenzyme A oxidase 1 OS=Homo sapiens GN=ACOX1 PE=1 SV=3	0	0	57	28	563	28	1	660	74.4	8.16	11695	801.46	28	21	0	4.72032e+08	4.87108e+08	4.82492e+08	5.77606e+08	5.77918e+08	5.72729e+08	6.68039e+08	6.9035e+08	6.26335e+08
High	High	Master Protein	P02786	Transferrin receptor protein 1 OS=Homo sapiens GN=TFRC PE=1 SV=2	0	0	52	35	721	35	1	760	84.8	6.61	17829	800.81	35	21	0	1.48546e+09	1.58936e+09	1.45876e+09	1.59024e+09	1573858436	1.49936e+09	1.65807e+09	1.62178e+09	1.64116e+09
High	High	Master Protein	Q13045	Protein flightless-1 homolog OS=Homo sapiens GN=FLII PE=1 SV=2	0	0	51	54	668	54	1	1269	144.7	6.05	16368	800.75	52	29	0	6.7793e+08	7.13478e+08	6.74699e+08	8.77741e+08	9.32926e+08	9.36699e+08	5.63093e+08	5.80705e+08	5.66102e+08	Acetyl [N-Term]
High	High	Master Protein	O15031	Plexin-B2 OS=Homo sapiens GN=PLXNB2 PE=1 SV=3	0	0	40	53	573	53	1	1838	205	6.24	12649	800.05	53	32	0	2.70632e+08	2.62356e+08	2.54599e+08	3.14394e+08	3.14101e+08	3.17689e+08	2.96567e+08	2.90318e+08	2.79413e+08
High	High	Master Protein	Q8TEX9	Importin-4 OS=Homo sapiens GN=IPO4 PE=1 SV=2	0	0	58	48	653	48	1	1081	118.6	4.96	15415	799.19	48	23	0	5.72333e+08	6.03641e+08	6.01087e+08	7.49504e+08	7.97821e+08	7.59202e+08	7.4207e+08	7.27501e+08	7.25181e+08	Acetyl [N-Term]
High	High	Master Protein	Q9Y266	Nuclear migration protein nudC OS=Homo sapiens GN=NUDC PE=1 SV=1	0	0	74	35	857	35	1	331	38.2	5.38	20131	798.68	35	18	0	2.21673e+09	2.4478e+09	2.16471e+09	2.75562e+09	2.76892e+09	2.67644e+09	2.54627e+09	2.33809e+09	2.46083e+09
High	High	Master Protein	Q93008	Probable ubiquitin carboxyl-terminal hydrolase FAF-X OS=Homo sapiens GN=USP9X PE=1 SV=3	0	0	40	85	812	50	1	2570	292.1	5.8	19240	797.83	85	42	35	4.65595e+08	4.84261e+08	4.64806e+08	6.32335e+08	6.47404e+08	6.30465e+08	5.09885e+08	5.00043e+08	4.89965e+08
High	High	Master Protein	P84077	ADP-ribosylation factor 1 OS=Homo sapiens GN=ARF1 PE=1 SV=2	0	0	71	16	716	2	1	181	20.7	6.8	16960	797.77	14	10	17	2.41786e+09	2.53937e+09	2.53789e+09	2.63144e+09	2.88717e+09	2.9461e+09	3.01492e+09	3.12178e+09	2.7291e+09
High	High	Master Protein	P61204	ADP-ribosylation factor 3 OS=Homo sapiens GN=ARF3 PE=1 SV=2	0	0	70	15	711	1	1	181	20.6	7.43	16858	797.77	13	10	0	959580	593175	784665	803823	951850	902492	683961	786974	840059	Acetyl [N-Term]
High	High	Master Protein	Q9BQS8	FYVE and coiled-coil domain-containing protein 1 OS=Homo sapiens GN=FYCO1 PE=1 SV=3	0	0	55	68	622	68	1	1478	166.9	4.92	14646	797.1	67	37	0	2.24492e+08	2.2548e+08	2.2126e+08	3.5536e+08	3.73281e+08	3.68595e+08	3.67671e+08	3.66644e+08	3.54294e+08	Acetyl [N-Term]
High	High	Master Protein	P49189	4-trimethylaminobutyraldehyde dehydrogenase OS=Homo sapiens GN=ALDH9A1 PE=1 SV=3	0	0	59	28	676	28	1	494	53.8	5.87	16183	796.96	27	17	0	1.83091e+09	1.9716e+09	1.76923e+09	2.72512e+09	2.67127e+09	2.5756e+09	2.56007e+09	2.48733e+09	2.49128e+09	Acetyl [N-Term]
High	High	Master Protein	P11413	Glucose-6-phosphate 1-dehydrogenase OS=Homo sapiens GN=G6PD PE=1 SV=4	0	0	78	38	745	38	1	515	59.2	6.84	17161	796.64	37	20	0	1.51727e+09	1.4917e+09	1.49268e+09	1.83048e+09	1.86925e+09	1.76367e+09	1.67385e+09	1.65025e+09	1.63356e+09	Acetyl [N-Term]
High	High	Master Protein	P83916	Chromobox protein homolog 1 OS=Homo sapiens GN=CBX1 PE=1 SV=1	0	0	72	14	502	13	1	185	21.4	4.93	12803	796.6	14	11	3	4.52141e+08	4.66311e+08	4.46931e+08	5.62207e+08	5.54169e+08	5.79194e+08	6.02475e+08	5.90517e+08	5.71895e+08
High	High	Master Protein	Q7L2H7	Eukaryotic translation initiation factor 3 subunit M OS=Homo sapiens GN=EIF3M PE=1 SV=1	0	0	54	18	533	18	1	374	42.5	5.63	11328	796.6	18	13	0	5.91522e+08	6.86519e+08	6.50342e+08	8.63586e+08	8.40502e+08	8.6483e+08	8.22868e+08	7.85856e+08	7.96408e+08	Acetyl [N-Term]
High	High	Master Protein	Q9UBF2	Coatomer subunit gamma-2 OS=Homo sapiens GN=COPG2 PE=1 SV=1	0	0	64	42	645	38	1	871	97.6	5.81	16080	796.55	42	26	0	3.61054e+08	3.80617e+08	3.74744e+08	4.70191e+08	4.93004e+08	4.83267e+08	4.38458e+08	4.46745e+08	4.53853e+08
High	High	Master Protein	O95757	Heat shock 70 kDa protein 4L OS=Homo sapiens GN=HSPA4L PE=1 SV=3	0	0	62	41	622	37	1	839	94.5	5.88	14420	796.08	41	24	0	2.57924e+08	2.68463e+08	2.71775e+08	3.21538e+08	3.18598e+08	3.24243e+08	3.10472e+08	3.44224e+08	3.15073e+08
High	High	Master Protein	Q8NFC6	Biorientation of chromosomes in cell division protein 1-like 1 OS=Homo sapiens GN=BOD1L1 PE=1 SV=2	0	0	34	84	721	82	1	3051	330.3	5.08	19966	793.64	83	44	1	1.31974e+08	1.30611e+08	1.24117e+08	1.77562e+08	1.83956e+08	1.79354e+08	1.68986e+08	1.76054e+08	1.73898e+08
High	High	Master Protein	P14314	Glucosidase 2 subunit beta OS=Homo sapiens GN=PRKCSH PE=1 SV=2	0	0	57	29	744	29	1	528	59.4	4.41	17022	792.1	29	17	0	2.23643e+09	2.28213e+09	2.23967e+09	2.64855e+09	2.68558e+09	2.63686e+09	2.30537e+09	2.27935e+09	2.27111e+09
High	High	Master Protein	O60701	UDP-glucose 6-dehydrogenase OS=Homo sapiens GN=UGDH PE=1 SV=1	0	0	79	37	667	37	1	494	55	7.12	14990	791.89	36	22	0	1.1244e+09	1.25568e+09	1.15152e+09	1.56799e+09	1.68616e+09	1.63929e+09	1.49628e+09	1.53119e+09	1.55841e+09
High	High	Master Protein	Q15643	Thyroid receptor-interacting protein 11 OS=Homo sapiens GN=TRIP11 PE=1 SV=3	0	0	53	95	821	95	1	1979	227.4	5.26	19526	791.49	94	42	0	3.0208e+08	3.19061e+08	3.00434e+08	4.15188e+08	4.2208e+08	4.07541e+08	3.79582e+08	3.79736e+08	3.69556e+08
High	High	Master Protein	P00491	Purine nucleoside phosphorylase OS=Homo sapiens GN=PNP PE=1 SV=2	0	0	87	20	604	20	1	289	32.1	6.95	13420	791.01	20	13	0	1.43223e+09	1.27676e+09	1.28342e+09	1.39411e+09	1.53853e+09	1.46744e+09	1.22164e+09	1.28002e+09	1.1476e+09	Acetyl [N-Term]
High	High	Master Protein	P22830	Ferrochelatase, mitochondrial OS=Homo sapiens GN=FECH PE=1 SV=2	0	0	65	22	542	22	1	423	47.8	8.73	12668	791	22	13	0	9.51753e+08	9.41913e+08	8.44059e+08	1.21042e+09	1.22439e+09	1.1871e+09	9.90664e+08	9.90221e+08	9.5666e+08
High	High	Master Protein	Q13347	Eukaryotic translation initiation factor 3 subunit I OS=Homo sapiens GN=EIF3I PE=1 SV=1	0	0	83	23	646	23	1	325	36.5	5.64	14201	790.78	23	13	0	1.54998e+09	1.59799e+09	1.63566e+09	2.15751e+09	2.22856e+09	2.22741e+09	1.75721e+09	1.70471e+09	1.66253e+09
High	High	Master Protein	Q01105	Protein SET OS=Homo sapiens GN=SET PE=1 SV=3	0	0	61	15	548	9	1	290	33.5	4.32	11887	789.1	15	11	6	3.98049e+09	4.2127e+09	4.2964e+09	4.93501e+09	4.98248e+09	5.0852e+09	4.38857e+09	4.29482e+09	4.31745e+09
High	High	Master Protein	P54577	Tyrosine--tRNA ligase, cytoplasmic OS=Homo sapiens GN=YARS PE=1 SV=4	0	0	78	45	876	45	1	528	59.1	7.05	19033	788.11	45	22	0	2.32953e+09	2.38051e+09	2.29862e+09	3.2593e+09	3.36314e+09	3.35644e+09	3.23847e+09	3.11283e+09	2.9331e+09	Acetyl [N-Term]
High	High	Master Protein	P20042	Eukaryotic translation initiation factor 2 subunit 2 OS=Homo sapiens GN=EIF2S2 PE=1 SV=2	0	0	71	35	861	35	1	333	38.4	5.8	21853	788.09	35	16	0	1.56719e+09	1.61537e+09	1.5051e+09	1.81634e+09	1.96634e+09	1.92225e+09	1.72727e+09	1.76766e+09	1.66121e+09	Acetyl [N-Term]
High	High	Master Protein Rejected	P50993	Sodium/potassium-transporting ATPase subunit alpha-2 OS=Homo sapiens GN=ATP1A2 PE=1 SV=1	0	0	18	17	539	0	0	1020	112.2	5.66	13823	788.02	17	9	0
High	High	Master Protein	P33993	DNA replication licensing factor MCM7 OS=Homo sapiens GN=MCM7 PE=1 SV=4	0	0	66	42	743	42	1	719	81.3	6.46	16286	781.64	41	23	0	1.28906e+09	1.34597e+09	1.23284e+09	1.53959e+09	1.48237e+09	1.4626e+09	9.84549e+08	8.98021e+08	9.16706e+08
High	High	Master Protein	Q14683	Structural maintenance of chromosomes protein 1A OS=Homo sapiens GN=SMC1A PE=1 SV=2	0	0	66	92	961	90	1	1233	143.1	7.64	21829	780.69	91	37	2	1.06849e+09	1.12843e+09	1.08973e+09	1.25292e+09	1.28629e+09	1.2471e+09	1.05632e+09	9.9938e+08	1.00791e+09
High	High	Master Protein	Q9C0D5	Protein TANC1 OS=Homo sapiens GN=TANC1 PE=1 SV=3	0	0	52	74	682	74	1	1861	202.1	8.32	16403	779.59	74	36	0	3.08086e+08	2.96371e+08	2.93348e+08	3.22082e+08	3.37554e+08	3.37084e+08	3.64893e+08	3.62059e+08	3.5448e+08
High	High	Master Protein	Q9Y3F4	Serine-threonine kinase receptor-associated protein OS=Homo sapiens GN=STRAP PE=1 SV=1	0	0	79	24	679	24	1	350	38.4	5.12	15919	779.02	24	16	0	1.38281e+09	1.27271e+09	1.24685e+09	1.58109e+09	1.5816e+09	1.60281e+09	1.58338e+09	1.60747e+09	1.52094e+09
High	High	Master Protein	O14974	Protein phosphatase 1 regulatory subunit 12A OS=Homo sapiens GN=PPP1R12A PE=1 SV=1	0	0	51	46	669	45	1	1030	115.2	5.4	16628	778.39	46	22	1	4.18792e+08	4.38395e+08	4.29214e+08	6.27561e+08	6.21322e+08	6.56096e+08	6.37995e+08	6.84184e+08	6.87335e+08
High	High	Master Protein	Q9H2G2	STE20-like serine/threonine-protein kinase OS=Homo sapiens GN=SLK PE=1 SV=1	0	0	50	51	620	49	1	1235	142.6	5.15	14912	777.05	49	31	2	2.90274e+08	2.71041e+08	2.78594e+08	3.36831e+08	3.6222e+08	3.43789e+08	3.56356e+08	3.64318e+08	3.31235e+08	Acetyl [N-Term]
High	High	Master Protein	Q5TH69	Brefeldin A-inhibited guanine nucleotide-exchange protein 3 OS=Homo sapiens GN=ARFGEF3 PE=1 SV=3	0	0	44	76	729	76	1	2177	240.5	5.82	18680	776.86	74	42	0	3.37987e+08	3.48994e+08	3.38614e+08	4.06535e+08	4.10169e+08	4.25403e+08	3.85813e+08	3.92897e+08	3.94289e+08
High	High	Master Protein	Q99497	Protein DJ-1 OS=Homo sapiens GN=PARK7 PE=1 SV=2	0	0	83	16	640	16	1	189	19.9	6.79	12390	775.52	16	10	0	4.78211e+09	5.32265e+09	5.26441e+09	7.29048e+09	7.40042e+09	7.30909e+09	6.75582e+09	7.04509e+09	7.25183e+09
High	High	Master Protein	Q15155	Nodal modulator 1 OS=Homo sapiens GN=NOMO1 PE=1 SV=5	0	0	51	45	685	1	1	1222	134.2	5.81	15353	775.2	44	27	0	6.71828e+06	6.57364e+06	8.73964e+06	1.03305e+07	1.15344e+07	1.42854e+07	1.04517e+07	1.26145e+07	1.22969e+07
High	High	Master Protein	O95831	Apoptosis-inducing factor 1, mitochondrial OS=Homo sapiens GN=AIFM1 PE=1 SV=1	0	0	52	26	610	26	1	613	66.9	8.95	13708	774.47	26	17	0	9.63728e+08	9.34659e+08	8.54381e+08	1.11588e+09	1.23914e+09	1.07444e+09	8.78527e+08	9.08424e+08	8.95382e+08
High	High	Master Protein	Q14247	Src substrate cortactin OS=Homo sapiens GN=CTTN PE=1 SV=2	0	0	58	36	673	36	1	550	61.5	5.4	18036	774.05	36	20	0	1.36566e+09	1.26863e+09	1.29724e+09	1.82921e+09	1.84892e+09	1.97057e+09	1.14907e+09	1.15734e+09	1.12308e+09
High	High	None	P69849	Nodal modulator 3 OS=Homo sapiens GN=NOMO3 PE=3 SV=2	0	0	55	46	683	2	1	1222	134	5.67	15352	771.52	45	28	0	5.18543e+08	5.65516e+08	5.16021e+08	6.7595e+08	6.9549e+08	6.80002e+08	6.7506e+08	6.80676e+08	6.68022e+08
High	High	Master Protein	P18583	Protein SON OS=Homo sapiens GN=SON PE=1 SV=4	0	0	36	68	789	68	1	2426	263.7	5.64	16532	770.6	66	35	0	7.73561e+08	8.08188e+08	7.71811e+08	1.06953e+09	1.08021e+09	1.09117e+09	9.10829e+08	9.44328e+08	9.38233e+08	Acetyl [N-Term]
High	High	Master Protein	Q13620	Cullin-4B OS=Homo sapiens GN=CUL4B PE=1 SV=4	0	0	57	52	791	39	1	913	103.9	7.37	20941	769.94	52	28	13	1.40306e+09	1.47734e+09	1.44388e+09	1.81561e+09	1.83634e+09	1.82367e+09	1.73784e+09	1.72581e+09	1.70145e+09
High	High	Master Protein	P55809	Succinyl-CoA:3-ketoacid coenzyme A transferase 1, mitochondrial OS=Homo sapiens GN=OXCT1 PE=1 SV=1	0	0	56	22	570	22	1	520	56.1	7.46	14169	768.54	22	14	0	6.41145e+08	6.847e+08	6.89449e+08	8.19389e+08	8.86381e+08	8.74515e+08	7.49589e+08	7.72909e+08	6.88979e+08
High	High	Master Protein	P62241	40S ribosomal protein S8 OS=Homo sapiens GN=RPS8 PE=1 SV=2	0	0	60	15	579	15	1	208	24.2	10.32	12542	768.51	15	10	0	3.5633e+09	3.92151e+09	3.87454e+09	5.29225e+09	5.50513e+09	5.34227e+09	5.13574e+09	5.02799e+09	4.94136e+09
High	High	Master Protein	P30043	Flavin reductase (NADPH) OS=Homo sapiens GN=BLVRB PE=1 SV=3	0	0	67	11	529	11	1	206	22.1	7.65	13542	766.79	11	7	0	1.15095e+09	1.15415e+09	1.16984e+09	1.40226e+09	1.513e+09	1.50262e+09	1.29853e+09	1.4e+09	1.33513e+09
High	High	Master Protein	P11216	Glycogen phosphorylase, brain form OS=Homo sapiens GN=PYGB PE=1 SV=5	0	0	62	52	760	42	1	843	96.6	6.86	17442	766.42	52	28	12	1.27748e+09	1.31699e+09	1.31386e+09	1.65505e+09	1.64312e+09	1.5844e+09	1.61026e+09	1.64788e+09	1.48031e+09
High	High	Master Protein	O95394	Phosphoacetylglucosamine mutase OS=Homo sapiens GN=PGM3 PE=1 SV=1	0	0	71	29	626	29	1	542	59.8	6.25	14275	765.39	29	18	0	7.25754e+08	7.91026e+08	7.25552e+08	9.09189e+08	9.57366e+08	9.12854e+08	8.67576e+08	8.45793e+08	8.18619e+08	Acetyl [N-Term]
High	High	Master Protein	Q08J23	tRNA (cytosine(34)-C(5))-methyltransferase OS=Homo sapiens GN=NSUN2 PE=1 SV=2	0	0	80	53	719	53	1	767	86.4	6.77	17107	764.84	52	29	0	9.91976e+08	9.64654e+08	9.67411e+08	1.28891e+09	1.24947e+09	1.20072e+09	1.21497e+09	1.25111e+09	1.17957e+09
High	High	Master Protein	E9PAV3	Nascent polypeptide-associated complex subunit alpha, muscle-specific form OS=Homo sapiens GN=NACA PE=1 SV=1	0	0	8	10	506	8	1	2078	205.3	9.58	12950	762.12	8	7	2	1.3319e+09	1.32913e+09	1367861379	2.13551e+09	1.88456e+09	1913090476	1.89361e+09	2.09932e+09	2.01017e+09
High	High	Master Protein	Q05086	Ubiquitin-protein ligase E3A OS=Homo sapiens GN=UBE3A PE=1 SV=4	0	0	52	40	628	40	1	875	100.6	5.22	15296	761.33	39	24	0	3.35325e+08	3.27147e+08	3.33682e+08	3.95419e+08	4.05518e+08	4.07007e+08	4.06774e+08	4.23954e+08	3.99964e+08
High	High	Master Protein	O94906	Pre-mRNA-processing factor 6 OS=Homo sapiens GN=PRPF6 PE=1 SV=1	0	0	61	53	707	53	1	941	106.9	8.25	17758	760.22	53	25	0	6.38266e+08	6.26574e+08	6.16626e+08	7.42011e+08	7.76141e+08	7.75427e+08	6.9722e+08	6.83176e+08	7.0315e+08
High	High	Master Protein	O43390	Heterogeneous nuclear ribonucleoprotein R OS=Homo sapiens GN=HNRNPR PE=1 SV=1	0	0	58	38	851	26	1	633	70.9	8.13	19124	759.81	35	22	13	2.71819e+09	2.59917e+09	2.45009e+09	3.07051e+09	3.17348e+09	3.20285e+09	2.83493e+09	2.73376e+09	2.75451e+09	Acetyl [N-Term]
High	High	Master Protein	Q02750	Dual specificity mitogen-activated protein kinase kinase 1 OS=Homo sapiens GN=MAP2K1 PE=1 SV=2	0	0	63	22	453	14	1	393	43.4	6.62	10293	758.65	22	8	0	2.28847e+08	2.24253e+08	2.1951e+08	3.7414e+08	3.55332e+08	3.71503e+08	3.16745e+08	3.25394e+08	3.30404e+08
High	High	Master Protein	P46063	ATP-dependent DNA helicase Q1 OS=Homo sapiens GN=RECQL PE=1 SV=3	0	0	61	34	627	33	1	649	73.4	7.88	14549	758.47	33	20	1	5.99404e+08	6.9527e+08	6.23315e+08	8.07729e+08	7.82994e+08	7.72213e+08	6.12601e+08	6.55099e+08	6.33688e+08
High	High	Master Protein	P32322	Pyrroline-5-carboxylate reductase 1, mitochondrial OS=Homo sapiens GN=PYCR1 PE=1 SV=2	0	0	69	19	564	18	1	319	33.3	7.61	16089	757.94	19	17	1	6.02565e+08	5.70175e+08	5.60887e+08	7.93792e+08	7.95575e+08	7.80263e+08	6.38603e+08	6.54794e+08	6.26401e+08	Acetyl [N-Term]
High	High	Master Protein	P62495	Eukaryotic peptide chain release factor subunit 1 OS=Homo sapiens GN=ETF1 PE=1 SV=3	0	0	56	25	634	25	1	437	49	5.71	14711	757.93	25	14	0	1.26304e+09	1.1139e+09	1.11178e+09	1405075398	1.44299e+09	1.35939e+09	1.284e+09	1.3055e+09	1.21067e+09	Acetyl [N-Term]
High	High	Master Protein	P28070	Proteasome subunit beta type-4 OS=Homo sapiens GN=PSMB4 PE=1 SV=4	0	0	52	9	418	9	1	264	29.2	5.97	9312	757.46	9	5	0	5.95319e+08	6.33539e+08	6.52422e+08	6.69878e+08	6.48845e+08	6.71502e+08	7.02602e+08	6.56705e+08	6.41666e+08	Acetyl [N-Term]
High	High	Master Protein	P78347	General transcription factor II-I OS=Homo sapiens GN=GTF2I PE=1 SV=2	0	0	61	55	767	55	1	998	112.3	6.39	17268	756.34	54	30	0	9.03309e+08	9.19994e+08	9.40594e+08	1.16022e+09	1.16904e+09	1.20766e+09	9.81209e+08	1.02695e+09	1.0012e+09	Acetyl [N-Term]
High	High	Master Protein	P42167	Lamina-associated polypeptide 2, isoforms beta/gamma OS=Homo sapiens GN=TMPO PE=1 SV=2	0	0	57	21	510	10	1	454	50.6	9.38	12634	756.32	21	15	0	1.73356e+08	1.88007e+08	1.7426e+08	2.2695e+08	2.1735e+08	2.07447e+08	1.43442e+08	1.42266e+08	1.51678e+08
High	High	Master Protein	Q15181	Inorganic pyrophosphatase OS=Homo sapiens GN=PPA1 PE=1 SV=2	0	0	74	17	712	16	1	289	32.6	5.86	16405	753.92	17	10	0	2.19014e+09	2.18102e+09	2.13107e+09	2.79452e+09	2.70756e+09	2.75528e+09	2.65451e+09	2.5692e+09	2.59651e+09
High	High	Master Protein	P08865	40S ribosomal protein SA OS=Homo sapiens GN=RPSA PE=1 SV=4	0	0	66	20	703	20	1	295	32.8	4.87	18190	753.19	20	13	0	4.82261e+09	5.0927e+09	4.73579e+09	5.51084e+09	5.73225e+09	5.73997e+09	5.46487e+09	5.36036e+09	5.11477e+09	Acetyl [N-Term]
High	High	Master Protein	P35241	Radixin OS=Homo sapiens GN=RDX PE=1 SV=1	0	0	70	50	727	32	1	583	68.5	6.37	14555	752.9	50	25	23	1.47837e+09	1.53981e+09	1.52769e+09	2.19056e+09	2.43882e+09	2.30285e+09	2.12872e+09	2.15542e+09	2.08293e+09
High	High	Master Protein	O94979	Protein transport protein Sec31A OS=Homo sapiens GN=SEC31A PE=1 SV=3	0	0	48	48	634	48	1	1220	132.9	6.89	14540	750.62	47	25	0	1.24169e+09	1.22694e+09	1.25771e+09	1.75854e+09	1.99044e+09	1.89993e+09	1.63398e+09	1.76807e+09	1.7272e+09
High	High	Master Protein	Q9Y5B9	FACT complex subunit SPT16 OS=Homo sapiens GN=SUPT16H PE=1 SV=1	0	0	43	44	664	44	1	1047	119.8	5.66	14303	749.47	43	29	0	9.25205e+08	9.07268e+08	8.89466e+08	1.0891e+09	1.11468e+09	1.15779e+09	9.40807e+08	9.48063e+08	9.26828e+08
High	High	Master Protein	P49006	MARCKS-related protein OS=Homo sapiens GN=MARCKSL1 PE=1 SV=2	0	0	78	7	519	6	1	195	19.5	4.67	12936	748.31	7	5	0	8.60101e+08	7.61345e+08	6.38707e+08	8.6254e+08	8.88673e+08	9.42829e+08	1.0653e+09	9.47371e+08	1030753935
High	High	Master Protein	O94973	AP-2 complex subunit alpha-2 OS=Homo sapiens GN=AP2A2 PE=1 SV=2	0	0	56	40	686	32	1	939	103.9	6.96	15928	747.34	39	22	0	5.32228e+08	5.1397e+08	4.05686e+08	474113218	5.61135e+08	6.2858e+08	5.32798e+08	5.30875e+08	4.68263e+08
High	High	None	Q13765	Nascent polypeptide-associated complex subunit alpha OS=Homo sapiens GN=NACA PE=1 SV=1	0	0	49	7	501	5	1	215	23.4	4.56	12941	745.89	7	5	0	1.32728e+09	1.3251e+09	1364141982	2.13156e+09	1.88078e+09	1.9103e+09	1.89068e+09	2.09592e+09	2.00797e+09
High	High	Master Protein	Q96TA1	Niban-like protein 1 OS=Homo sapiens GN=FAM129B PE=1 SV=3	0	0	64	36	531	36	1	746	84.1	6.19	10736	745.84	35	19	0	4.50764e+08	5.14723e+08	4.87565e+08	5.73338e+08	5.57284e+08	5.71252e+08	4.46176e+08	4.20669e+08	4.32513e+08	Acetyl [N-Term]
High	High	Master Protein	Q96KR1	Zinc finger RNA-binding protein OS=Homo sapiens GN=ZFR PE=1 SV=2	0	0	52	47	550	46	1	1074	116.9	9.04	14242	745.42	47	24	0	3.39867e+08	3.53704e+08	3.55143e+08	4.59464e+08	4.89273e+08	4.9739e+08	4.16984e+08	4.29271e+08	4.03773e+08	Acetyl [N-Term]
High	High	Master Protein	P34949	Mannose-6-phosphate isomerase OS=Homo sapiens GN=MPI PE=1 SV=2	0	0	60	20	571	20	1	423	46.6	5.95	13243	744.55	20	14	0	7.397e+08	7.64419e+08	7.39264e+08	9.8077e+08	1.03734e+09	1.00209e+09	8.81644e+08	8.26661e+08	8.48838e+08
High	High	Master Protein	Q15139	Serine/threonine-protein kinase D1 OS=Homo sapiens GN=PRKD1 PE=1 SV=2	0	0	46	32	562	28	1	912	101.6	6.62	11813	744.33	32	22	5	6.36083e+08	6.4505e+08	5.9637e+08	7.65311e+08	7.83319e+08	7.61565e+08	7.09749e+08	6.80323e+08	6.36663e+08
High	High	Master Protein	Q9UKG1	DCC-interacting protein 13-alpha OS=Homo sapiens GN=APPL1 PE=1 SV=1	0	0	49	26	494	26	1	709	79.6	5.41	13100	743.25	26	15	0	2.55545e+08	2.62786e+08	2.60029e+08	3.27601e+08	3.33678e+08	2.90622e+08	3.13055e+08	3.20529e+08	3.1406e+08
High	High	Master Protein	O60610	Protein diaphanous homolog 1 OS=Homo sapiens GN=DIAPH1 PE=1 SV=2	0	0	49	58	706	57	1	1272	141.3	5.41	14000	742.22	56	28	1	7.76146e+08	7.50763e+08	7.296e+08	8.88106e+08	9.13519e+08	9.19244e+08	7.25011e+08	7.424e+08	7.31728e+08
High	High	Master Protein	P61247	40S ribosomal protein S3a OS=Homo sapiens GN=RPS3A PE=1 SV=2	0	0	65	23	679	23	1	264	29.9	9.73	16013	742.17	23	9	0	4.17868e+09	4.52648e+09	4.59159e+09	6.01953e+09	6.21019e+09	6.2085e+09	6.0473e+09	6.12708e+09	5.69939e+09
High	High	Master Protein	A6NHR9	Structural maintenance of chromosomes flexible hinge domain-containing protein 1 OS=Homo sapiens GN=SMCHD1 PE=1 SV=2	0	0	48	92	999	92	1	2005	226.2	7.3	24073	741.03	92	38	0	1.00939e+09	1.07571e+09	1.04795e+09	1.25778e+09	1.29765e+09	1.32613e+09	1.12398e+09	1.16795e+09	1.09493e+09	Acetyl [N-Term]
High	High	Master Protein	Q92621	Nuclear pore complex protein Nup205 OS=Homo sapiens GN=NUP205 PE=1 SV=3	0	0	38	62	727	62	1	2012	227.8	6.19	16404	740.23	62	33	0	5.24943e+08	5.37788e+08	5.22882e+08	5.81626e+08	5.9075e+08	5.99834e+08	5.03694e+08	4.95235e+08	5.17628e+08	Acetyl [N-Term]
High	High	Master Protein	P55036	26S proteasome non-ATPase regulatory subunit 4 OS=Homo sapiens GN=PSMD4 PE=1 SV=1	0	0	50	17	498	17	1	377	40.7	4.79	12247	738.81	17	10	0	9.44847e+08	9.92406e+08	9.2591e+08	1.33233e+09	1.35759e+09	1.34235e+09	1.0948e+09	1.04564e+09	1.07809e+09
High	High	Master Protein	Q13561	Dynactin subunit 2 OS=Homo sapiens GN=DCTN2 PE=1 SV=4	0	0	77	21	502	21	1	401	44.2	5.21	11313	737.74	21	14	0	6.6594e+08	6.57591e+08	6.57549e+08	8.86845e+08	9.32409e+08	9.24156e+08	8.02141e+08	7.9053e+08	9.4447e+08
High	High	Master Protein	P42566	Epidermal growth factor receptor substrate 15 OS=Homo sapiens GN=EPS15 PE=1 SV=2	0	0	59	42	523	42	1	896	98.6	4.64	12436	737.59	41	23	0	2.82757e+08	2.93958e+08	2.84077e+08	3.44378e+08	3.72637e+08	3.58873e+08	3.69389e+08	3.82962e+08	3.52107e+08	Acetyl [N-Term]
High	High	Master Protein	P61163	Alpha-centractin OS=Homo sapiens GN=ACTR1A PE=1 SV=1	0	0	73	25	590	13	1	376	42.6	6.64	13163	736.73	25	12	15	6.04312e+08	6.78241e+08	6.67278e+08	9.44742e+08	1.03778e+09	977576789	9.29322e+08	8.96132e+08	8.99688e+08	Acetyl [N-Term]
High	High	Master Protein	Q9BY44	Eukaryotic translation initiation factor 2A OS=Homo sapiens GN=EIF2A PE=1 SV=3	0	0	70	34	550	34	1	585	64.9	8.87	11961	734.58	32	22	0	6.18992e+08	6.47463e+08	6.50164e+08	8.32544e+08	8.90054e+08	9.08125e+08	8.40629e+08	8.75844e+08	8.35917e+08
High	High	Master Protein	O75592	E3 ubiquitin-protein ligase MYCBP2 OS=Homo sapiens GN=MYCBP2 PE=1 SV=3	0	0	29	102	755	102	1	4640	509.8	7.03	17641	734.1	98	46	0	2.51972e+08	2.60553e+08	2.51754e+08	3.1691e+08	3.13765e+08	3.04828e+08	3.32205e+08	3.24672e+08	3.21697e+08
High	High	Master Protein	P43490	Nicotinamide phosphoribosyltransferase OS=Homo sapiens GN=NAMPT PE=1 SV=1	0	0	72	29	543	29	1	491	55.5	7.15	12160	734.02	29	16	0	8.8506e+08	924080185	8.93665e+08	1.11241e+09	1.18224e+09	1.19083e+09	8.72473e+08	8.73993e+08	8.68775e+08	Acetyl [N-Term]
High	High	Master Protein	O75165	DnaJ homolog subfamily C member 13 OS=Homo sapiens GN=DNAJC13 PE=1 SV=5	0	0	40	75	630	75	1	2243	254.3	6.74	14397	733.74	74	33	0	2.45676e+08	2.51296e+08	2.45099e+08	3.01237e+08	3.00941e+08	3.06647e+08	2.91631e+08	2.92569e+08	2.94173e+08
High	High	Master Protein	O95347	Structural maintenance of chromosomes protein 2 OS=Homo sapiens GN=SMC2 PE=1 SV=2	0	0	58	67	719	67	1	1197	135.6	8.43	15693	732.53	64	31	0	7.86101e+08	8.77187e+08	7.93805e+08	9.20874e+08	8.72881e+08	8.60978e+08	6.68341e+08	6.6747e+08	6.75376e+08
High	High	Master Protein	P37802	Transgelin-2 OS=Homo sapiens GN=TAGLN2 PE=1 SV=3	0	0	81	18	605	18	1	199	22.4	8.25	13594	731.56	18	10	0	3.12073e+09	3.26082e+09	3.09819e+09	3.67254e+09	3.49058e+09	3.47377e+09	3172254449	3.02093e+09	3.10533e+09	Acetyl [N-Term]
High	High	Master Protein	P51148	Ras-related protein Rab-5C OS=Homo sapiens GN=RAB5C PE=1 SV=2	0	0	79	12	487	9	1	216	23.5	8.41	12702	731.14	12	9	3	7.40727e+08	7.31839e+08	6.75758e+08	9.19894e+08	8.8512e+08	9.52998e+08	1.02682e+09	1.02693e+09	9.06109e+08
High	High	Master Protein	P26038	Moesin OS=Homo sapiens GN=MSN PE=1 SV=3	0	0	67	47	725	31	1	577	67.8	6.4	16154	727.02	47	20	0	4.98241e+08	4.55612e+08	4.55408e+08	6.84851e+08	6.68663e+08	6.52482e+08	8.26117e+08	7.479e+08	7.58955e+08
High	High	Master Protein	P29966	Myristoylated alanine-rich C-kinase substrate OS=Homo sapiens GN=MARCKS PE=1 SV=4	0	0	59	14	450	13	1	332	31.5	4.45	14202	724.49	14	12	1	3.49508e+08	3.47497e+08	3.76579e+08	4.70443e+08	4.91734e+08	4.54068e+08	5.61822e+08	5.35075e+08	5.83752e+08
High	High	Master Protein	P51665	26S proteasome non-ATPase regulatory subunit 7 OS=Homo sapiens GN=PSMD7 PE=1 SV=2	0	0	54	14	421	14	1	324	37	6.77	9510	723.9	14	10	0	6.3949e+08	6.7921e+08	6.24721e+08	9.16011e+08	9.22386e+08	8.59574e+08	8.48664e+08	8.61327e+08	8.35135e+08
High	High	Master Protein	P62917	60S ribosomal protein L8 OS=Homo sapiens GN=RPL8 PE=1 SV=2	0	0	54	18	558	18	1	257	28	11.03	11843	723.67	18	10	0	2288054222	2.40302e+09	2.13303e+09	2.74933e+09	3.09796e+09	3.00872e+09	3.22457e+09	3.0309e+09	3.01561e+09
High	High	Master Protein	Q9BTC0	Death-inducer obliterator 1 OS=Homo sapiens GN=DIDO1 PE=1 SV=5	0	0	52	79	654	78	1	2240	243.7	7.88	13640	722.87	77	37	1	2.80566e+08	3.00197e+08	2.80949e+08	3.91164e+08	3.7131e+08	3.65057e+08	3.27144e+08	3.11064e+08	3.07215e+08	Acetyl [N-Term]
High	High	Master Protein	P07339	Cathepsin D OS=Homo sapiens GN=CTSD PE=1 SV=1	0	0	55	19	531	19	1	412	44.5	6.54	12561	720.28	19	9	0	1.35756e+09	1.4729e+09	1.28913e+09	1.8036e+09	1.84229e+09	1.70031e+09	1.55571e+09	1.54098e+09	1.61872e+09
High	High	Master Protein	P15170	Eukaryotic peptide chain release factor GTP-binding subunit ERF3A OS=Homo sapiens GN=GSPT1 PE=1 SV=1	0	0	66	27	662	12	1	499	55.7	5.62	13971	719.14	27	13	17	1.46424e+09	1.57573e+09	1.40697e+09	1.87173e+09	1.8779e+09	1.79763e+09	1.83044e+09	1.86036e+09	1.79278e+09
High	High	Master Protein	P54886	Delta-1-pyrroline-5-carboxylate synthase OS=Homo sapiens GN=ALDH18A1 PE=1 SV=2	0	0	58	41	685	41	1	795	87.2	7.12	16109	718.64	41	28	0	8.09773e+08	8.53245e+08	8.23018e+08	1.1477e+09	1.15253e+09	1.09665e+09	9.64712e+08	9.20932e+08	9.59358e+08
High	High	Master Protein	P13804	Electron transfer flavoprotein subunit alpha, mitochondrial OS=Homo sapiens GN=ETFA PE=1 SV=1	0	0	63	15	549	15	1	333	35.1	8.38	14183	718.38	15	12	0	1.47532e+09	1.47369e+09	1.42996e+09	1.91357e+09	1.99964e+09	2.06043e+09	1.71222e+09	1.89538e+09	1.81531e+09
High	High	Master Protein	Q9Y6D6	Brefeldin A-inhibited guanine nucleotide-exchange protein 1 OS=Homo sapiens GN=ARFGEF1 PE=1 SV=2	0	0	45	66	625	52	1	1849	208.6	5.85	15393	715.89	64	33	15	2.96671e+08	2.87899e+08	2.62175e+08	3.71034e+08	3.66566e+08	3.67995e+08	3.29841e+08	3.38357e+08	3.45198e+08
High	High	Master Protein	P15311	Ezrin OS=Homo sapiens GN=EZR PE=1 SV=4	0	0	61	46	689	32	1	586	69.4	6.27	13022	714.53	46	18	1	9.37156e+08	8.90418e+08	9.2275e+08	1.2427e+09	1.30994e+09	1.31577e+09	1.11763e+09	1.16845e+09	1.12423e+09
High	High	Master Protein	Q6P2E9	Enhancer of mRNA-decapping protein 4 OS=Homo sapiens GN=EDC4 PE=1 SV=1	0	0	53	48	633	48	1	1401	151.6	5.86	16042	713.47	48	25	0	4.67333e+08	5.07058e+08	4.69982e+08	6.10067e+08	6.34357e+08	5.94661e+08	5.28985e+08	5.23273e+08	5.00008e+08	Acetyl [N-Term]
High	High	Master Protein	Q9UBC2	Epidermal growth factor receptor substrate 15-like 1 OS=Homo sapiens GN=EPS15L1 PE=1 SV=1	0	0	78	46	584	46	1	864	94.2	5.11	15017	713.27	44	23	0	5.47663e+08	5.6537e+08	534873524	6.55249e+08	7.25727e+08	6.99766e+08	6.29403e+08	6.52229e+08	6.40986e+08	Acetyl [N-Term]
High	High	Master Protein	Q13162	Peroxiredoxin-4 OS=Homo sapiens GN=PRDX4 PE=1 SV=1	0	0	62	18	553	15	1	271	30.5	6.29	12370	713.06	18	12	0	1.06802e+09	1.13547e+09	1.05006e+09	1.16283e+09	1.389e+09	1.34099e+09	9.91315e+08	1.08921e+09	1.08713e+09
High	High	Master Protein	O00159	Unconventional myosin-Ic OS=Homo sapiens GN=MYO1C PE=1 SV=4	0	0	55	53	658	53	1	1063	121.6	9.41	14197	711.56	53	25	0	7.41415e+08	8.25434e+08	7.77229e+08	1.11195e+09	1.13401e+09	1.17486e+09	9.05424e+08	9.34093e+08	8.84472e+08
High	High	Master Protein	Q99536	Synaptic vesicle membrane protein VAT-1 homolog OS=Homo sapiens GN=VAT1 PE=1 SV=2	0	0	66	23	469	23	1	393	41.9	6.29	12048	711.5	22	16	0	3.70273e+08	3.66196e+08	3.73975e+08	4.98569e+08	5.05929e+08	4.97945e+08	5.08925e+08	4.97429e+08	4.91586e+08	Acetyl [N-Term]
High	High	Master Protein	P09960	Leukotriene A-4 hydrolase OS=Homo sapiens GN=LTA4H PE=1 SV=2	0	0	59	31	568	31	1	611	69.2	6.18	14086	709.89	30	17	0	5.10164e+08	4.82107e+08	4.7656e+08	6.26572e+08	6.06376e+08	6.00763e+08	5.26866e+08	5.47319e+08	5.3305e+08
High	High	Master Protein	Q99459	Cell division cycle 5-like protein OS=Homo sapiens GN=CDC5L PE=1 SV=2	0	0	71	51	609	51	1	802	92.2	8.18	13819	709.47	50	27	0	5.36974e+08	5.66435e+08	5.23434e+08	6.97135e+08	7.19724e+08	7.02381e+08	5.8942e+08	5.89012e+08	5.34659e+08
High	High	Master Protein	Q9UMX0	Ubiquilin-1 OS=Homo sapiens GN=UBQLN1 PE=1 SV=2	0	0	48	18	541	9	1	589	62.5	5.11	12693	709.42	18	13	0	1.57908e+08	1.69744e+08	1.64738e+08	199533549	2.03011e+08	2.08552e+08	1.85518e+08	1.82429e+08	1.69106e+08	Acetyl [N-Term]
High	High	Master Protein	Q9H2M9	Rab3 GTPase-activating protein non-catalytic subunit OS=Homo sapiens GN=RAB3GAP2 PE=1 SV=1	0	0	41	47	585	46	1	1393	155.9	5.62	12622	707.15	47	28	1	2.38711e+08	2.48625e+08	2.29369e+08	3.24772e+08	3.3863e+08	3.19721e+08	3.25314e+08	3.19274e+08	3.0827e+08
High	High	Master Protein	Q13177	Serine/threonine-protein kinase PAK 2 OS=Homo sapiens GN=PAK2 PE=1 SV=3	0	0	69	31	633	24	1	524	58	5.96	13808	707.07	31	13	10	7.66703e+08	7.97444e+08	7.88678e+08	1.01755e+09	1.06383e+09	1.03712e+09	9.52025e+08	9.45475e+08	9.1928e+08	Acetyl [N-Term]
High	High	Master Protein	P09110	3-ketoacyl-CoA thiolase, peroxisomal OS=Homo sapiens GN=ACAA1 PE=1 SV=2	0	0	64	18	414	18	1	424	44.3	8.44	11752	706.69	18	15	0	5.43766e+08	5.19253e+08	4.91427e+08	7.66856e+08	7.68203e+08	7.2515e+08	7.28446e+08	6.93464e+08	6.93274e+08
High	High	Master Protein	O43290	U4/U6.U5 tri-snRNP-associated protein 1 OS=Homo sapiens GN=SART1 PE=1 SV=1	0	0	51	37	566	37	1	800	90.2	6.13	15238	706.37	37	20	0	3.71681e+08	3.61867e+08	3.24254e+08	4.25733e+08	3.99496e+08	3.96453e+08	3.69988e+08	347650917	3.89755e+08
High	High	Master Protein	O00193	Small acidic protein OS=Homo sapiens GN=SMAP PE=1 SV=1	0	0	27	7	429	7	1	183	20.3	4.72	12274	706.02	7	6	0	1.24242e+08	1.3378e+08	1.33416e+08	1.89582e+08	1.95438e+08	2.09099e+08	1.37762e+08	1.48854e+08	1.4697e+08
High	High	Master Protein	Q8NI35	InaD-like protein OS=Homo sapiens GN=PATJ PE=1 SV=3	0	0	52	61	543	60	1	1801	196.2	4.94	12794	705.63	58	32	1	1.865e+08	1.80852e+08	1.71243e+08	2.43255e+08	2.46093e+08	2.48004e+08	1.41275e+08	1.51657e+08	1.47444e+08
High	High	Master Protein	Q96QK1	Vacuolar protein sorting-associated protein 35 OS=Homo sapiens GN=VPS35 PE=1 SV=2	0	0	51	39	731	38	1	796	91.6	5.49	19059	704.47	39	19	1	1.98552e+09	2.06641e+09	1.8487e+09	2.57006e+09	2.57366e+09	2.57442e+09	2.58653e+09	2.44948e+09	2.76322e+09
High	High	Master Protein	P45954	Short/branched chain specific acyl-CoA dehydrogenase, mitochondrial OS=Homo sapiens GN=ACADSB PE=1 SV=1	0	0	56	17	444	17	1	432	47.5	6.99	9902	703.89	17	11	0	3.26833e+08	2.95102e+08	2.99559e+08	4.49071e+08	4.6208e+08	4.68118e+08	3.53728e+08	3.73828e+08	3.85451e+08
High	High	Master Protein	Q92597	Protein NDRG1 OS=Homo sapiens GN=NDRG1 PE=1 SV=1	0	0	58	13	465	13	1	394	42.8	5.82	11416	703.48	13	10	0	2.50464e+08	2.66434e+08	2.37711e+08	3.90891e+08	4.10359e+08	3.90864e+08	2.60788e+08	2.65584e+08	2.56766e+08
High	High	Master Protein	O60264	SWI/SNF-related matrix-associated actin-dependent regulator of chromatin subfamily A member 5 OS=Homo sapiens GN=SMARCA5 PE=1 SV=1	0	0	54	59	731	47	1	1052	121.8	8.09	17711	701.77	59	20	13	8.21992e+08	7.68648e+08	7.50661e+08	8.86643e+08	9.12793e+08	8.862e+08	6.89527e+08	6.91538e+08	6.53019e+08	Acetyl [N-Term]
High	High	Master Protein	O94826	Mitochondrial import receptor subunit TOM70 OS=Homo sapiens GN=TOMM70 PE=1 SV=1	0	0	74	37	624	37	1	608	67.4	7.12	15028	700.25	37	19	0	7.31086e+08	7.2898e+08	6.9577e+08	1.00783e+09	1.01835e+09	9.88833e+08	9.97025e+08	9.87327e+08	9.96481e+08	Acetyl [N-Term]
High	High	Master Protein	O60282	Kinesin heavy chain isoform 5C OS=Homo sapiens GN=KIF5C PE=1 SV=1	0	0	52	44	533	28	1	957	109.4	6.19	12250	697.51	42	24	0	4.1395e+07	41928840	4.1443e+07	5.37268e+07	6.21791e+07	5.74915e+07	3.84247e+07	4.2354e+07	4.04748e+07
High	High	Master Protein	P04632	Calpain small subunit 1 OS=Homo sapiens GN=CAPNS1 PE=1 SV=1	0	0	79	15	418	15	1	268	28.3	5.2	12017	697.5	15	10	0	2.71052e+08	2.84498e+08	2.53727e+08	4.07714e+08	3.91145e+08	3.61602e+08	3.8024e+08	3.64214e+08	3.81017e+08	Acetyl [N-Term]
High	High	Master Protein	O15381	Nuclear valosin-containing protein-like OS=Homo sapiens GN=NVL PE=1 SV=1	0	0	61	47	560	47	1	856	95	6.48	13196	696.92	46	19	0	3.89083e+08	4.05805e+08	3.74804e+08	4.88919e+08	4.90606e+08	4.81082e+08	4.63702e+08	4.47413e+08	439208922
High	High	Master Protein	O15372	Eukaryotic translation initiation factor 3 subunit H OS=Homo sapiens GN=EIF3H PE=1 SV=1	0	0	86	25	529	25	1	352	39.9	6.54	12981	696.1	22	13	0	8.65257e+08	8.88701e+08	9.25246e+08	1.08968e+09	1.14922e+09	1.20306e+09	1.06917e+09	1.02117e+09	1.0272e+09
High	High	Master Protein	Q9BT78	COP9 signalosome complex subunit 4 OS=Homo sapiens GN=COPS4 PE=1 SV=1	0	0	68	23	525	23	1	406	46.2	5.83	12738	696.06	23	17	0	6.63194e+08	7.18421e+08	6.86235e+08	8.94386e+08	9.42645e+08	9.12864e+08	8.35601e+08	8.41975e+08	8.39539e+08
High	High	Master Protein	Q9Y263	Phospholipase A-2-activating protein OS=Homo sapiens GN=PLAA PE=1 SV=2	0	0	62	45	621	45	1	795	87.1	6.37	14616	694.79	45	26	0	5.45518e+08	5.3363e+08	5.27041e+08	6.43345e+08	7.31089e+08	6.88402e+08	6.97061e+08	6.68311e+08	6.89023e+08
High	High	Master Protein	O95602	DNA-directed RNA polymerase I subunit RPA1 OS=Homo sapiens GN=POLR1A PE=1 SV=2	0	0	52	65	574	64	1	1720	194.7	7.03	13020	694.66	65	29	1	2.68243e+08	2.80579e+08	2.55695e+08	2.94819e+08	2.94426e+08	3.21974e+08	3.19524e+08	3.17646e+08	3.12961e+08
High	High	Master Protein	Q96K76	Ubiquitin carboxyl-terminal hydrolase 47 OS=Homo sapiens GN=USP47 PE=1 SV=3	0	0	51	60	633	60	1	1375	157.2	5.08	16216	690.88	59	30	0	3.2432e+08	3.32651e+08	3.24058e+08	4.37472e+08	4.14966e+08	4.06618e+08	4.83642e+08	4.78662e+08	4.71121e+08
High	High	Master Protein	O95573	Long-chain-fatty-acid--CoA ligase 3 OS=Homo sapiens GN=ACSL3 PE=1 SV=3	0	0	58	34	556	32	1	720	80.4	8.38	11907	690.46	34	20	2	5.14495e+08	5.41227e+08	5.16831e+08	5.74168e+08	5.82667e+08	5.93096e+08	5.03558e+08	4.8244e+08	4.92877e+08	Acetyl [N-Term]
High	High	Master Protein	P61158	Actin-related protein 3 OS=Homo sapiens GN=ACTR3 PE=1 SV=3	0	0	63	23	469	21	1	418	47.3	5.88	9349	690.12	23	13	2	7.578e+08	7.55903e+08	7.48474e+08	1.05696e+09	1.03452e+09	9.75557e+08	8.96483e+08	8.90105e+08	9.01704e+08	Acetyl [N-Term]
High	High	Master Protein	Q15293	Reticulocalbin-1 OS=Homo sapiens GN=RCN1 PE=1 SV=1	0	0	76	21	460	21	1	331	38.9	5	9104	690.03	19	13	0	1.0488e+09	1.13553e+09	1.08262e+09	1.35899e+09	1.37228e+09	1.36833e+09	1.37757e+09	1.49763e+09	1.30219e+09
High	High	Master Protein	Q15020	Squamous cell carcinoma antigen recognized by T-cells 3 OS=Homo sapiens GN=SART3 PE=1 SV=1	0	0	55	46	648	46	1	963	109.9	5.57	16567	688.26	46	22	0	4.90077e+08	4.79696e+08	4.80771e+08	6.40199e+08	6.50669e+08	6.33842e+08	6.04209e+08	6.41096e+08	6.28465e+08	Acetyl [N-Term]
High	High	Master Protein	P53675	Clathrin heavy chain 2 OS=Homo sapiens GN=CLTCL1 PE=1 SV=2	0	0	13	20	617	1	1	1640	186.9	5.85	14757	686.3	20	16	0	603049	685920	459188	2.98067e+06	2.94933e+06	2.10204e+06	2.31404e+06	1.79516e+06	1.75515e+06
High	High	Master Protein	Q13283	Ras GTPase-activating protein-binding protein 1 OS=Homo sapiens GN=G3BP1 PE=1 SV=1	0	0	56	22	617	20	1	466	52.1	5.52	13558	685.77	21	15	2	1.31677e+09	1.50033e+09	1.4024e+09	1.81865e+09	1.89967e+09	1.87472e+09	1.57582e+09	1.60157e+09	1.51037e+09
High	High	Master Protein	P31948	Stress-induced-phosphoprotein 1 OS=Homo sapiens GN=STIP1 PE=1 SV=1	0	0	70	45	1058	45	1	543	62.6	6.8	22883	683.93	45	11	0	6.76514e+09	7.02521e+09	6.54174e+09	8.64599e+09	8.85362e+09	8.55895e+09	8.23617e+09	8.06634e+09	7.86761e+09	Acetyl [N-Term]
High	High	Master Protein	Q9H6Z4	Ran-binding protein 3 OS=Homo sapiens GN=RANBP3 PE=1 SV=1	0	0	52	26	534	26	1	567	60.2	4.78	14460	683.3	26	13	0	4.06041e+08	4.52608e+08	4.23098e+08	5.56983e+08	5.49588e+08	5.36021e+08	5.11777e+08	5.03576e+08	4.80053e+08	Acetyl [N-Term]
High	High	Master Protein	Q7LBC6	Lysine-specific demethylase 3B OS=Homo sapiens GN=KDM3B PE=1 SV=2	0	0	57	66	565	64	1	1761	191.5	7.18	12311	682.11	62	38	2	1.93846e+08	1.96697e+08	1.90567e+08	2.69238e+08	2.83508e+08	2.85718e+08	1.86805e+08	1.8587e+08	1.79333e+08	Acetyl [N-Term]
High	High	Master Protein	P07384	Calpain-1 catalytic subunit OS=Homo sapiens GN=CAPN1 PE=1 SV=1	0	0	63	44	646	44	1	714	81.8	5.67	13642	681.99	44	25	0	1.12361e+09	1.03777e+09	1.03875e+09	1.28793e+09	1.43142e+09	1.3073e+09	1.28655e+09	1.31421e+09	1.22119e+09	Acetyl [N-Term]
High	High	Master Protein	Q92896	Golgi apparatus protein 1 OS=Homo sapiens GN=GLG1 PE=1 SV=2	0	0	49	48	624	48	1	1179	134.5	6.9	14908	681.72	48	27	0	5.27374e+08	5.12921e+08	5.47364e+08	7.37217e+08	7.20106e+08	7.2181e+08	7.07664e+08	8.05051e+08	7.86418e+08
High	High	Master Protein	O75150	E3 ubiquitin-protein ligase BRE1B OS=Homo sapiens GN=RNF40 PE=1 SV=4	0	0	47	49	593	42	1	1001	113.6	6.23	13807	681.33	49	26	0	4.24923e+08	4.75526e+08	4.54923e+08	5.69854e+08	5.65076e+08	5.96761e+08	5.18556e+08	4.74239e+08	4.67621e+08
High	High	Master Protein	P0DN79	Cystathionine beta-synthase-like protein OS=Homo sapiens GN=CBSL PE=1 SV=1	0	0	59	27	507	27	1	551	60.5	6.65	12535	680.87	27	14	0	7.94415e+08	8.38352e+08	7.62653e+08	1.03044e+09	1.05655e+09	1.01352e+09	9.87894e+08	9.66388e+08	9.42707e+08
High	High	Master Protein	P20810	Calpastatin OS=Homo sapiens GN=CAST PE=1 SV=4	0	0	57	34	531	34	1	708	76.5	5.07	12888	680.55	34	20	0	3.24911e+08	3.69342e+08	3.3605e+08	4.40888e+08	4.85304e+08	4.93103e+08	4.59961e+08	4.36202e+08	4.51351e+08
High	High	Master Protein	Q13155	Aminoacyl tRNA synthase complex-interacting multifunctional protein 2 OS=Homo sapiens GN=AIMP2 PE=1 SV=2	0	0	56	14	485	14	1	320	35.3	8.22	11848	679.44	14	7	0	6.65257e+08	6.83307e+08	6.66688e+08	9.02191e+08	8.95549e+08	9.37598e+08	9.23656e+08	9.36838e+08	9.86065e+08
High	High	Master Protein	Q9H0D6	5'-3' exoribonuclease 2 OS=Homo sapiens GN=XRN2 PE=1 SV=1	0	0	70	55	567	55	1	950	108.5	7.47	11509	678.57	55	32	0	5.28452e+08	5.66881e+08	5.25614e+08	7.53926e+08	7.25048e+08	7.12148e+08	6.48321e+08	6.34906e+08	6.36728e+08
High	High	Master Protein	Q9UHD1	Cysteine and histidine-rich domain-containing protein 1 OS=Homo sapiens GN=CHORDC1 PE=1 SV=2	0	0	73	24	610	24	1	332	37.5	7.87	13682	677.55	24	15	0	1.25874e+09	1.36902e+09	1.23834e+09	1.52217e+09	1.59733e+09	1.45525e+09	1.55518e+09	1.55454e+09	1.56819e+09	Acetyl [N-Term]
High	High	Master Protein	P78344	Eukaryotic translation initiation factor 4 gamma 2 OS=Homo sapiens GN=EIF4G2 PE=1 SV=1	0	0	63	52	731	52	1	907	102.3	7.14	17254	676.79	51	24	0	1.19241e+09	1.18035e+09	1.13089e+09	1.43533e+09	1.43939e+09	1.41374e+09	1.38325e+09	1.32702e+09	1.31734e+09	Acetyl [N-Term]
High	High	Master Protein	Q9Y4E8	Ubiquitin carboxyl-terminal hydrolase 15 OS=Homo sapiens GN=USP15 PE=1 SV=3	0	0	54	46	628	45	1	981	112.3	5.22	15056	676.2	45	19	1	3.85451e+08	4.03655e+08	3.68103e+08	5.00604e+08	4.84883e+08	4.75723e+08	5.30818e+08	5.1388e+08	5.08346e+08	Acetyl [N-Term]
High	High	Master Protein	Q6Y7W6	GRB10-interacting GYF protein 2 OS=Homo sapiens GN=GIGYF2 PE=1 SV=1	0	0	40	56	567	53	1	1299	150	5.54	11795	675.11	56	24	1	4.06271e+08	3.9385e+08	3.75935e+08	4.89082e+08	4.65747e+08	5.15355e+08	4.34367e+08	4.52343e+08	4.1749e+08	Acetyl [N-Term]
High	High	Master Protein	Q9Y262	Eukaryotic translation initiation factor 3 subunit L OS=Homo sapiens GN=EIF3L PE=1 SV=1	0	0	64	31	583	31	1	564	66.7	6.34	13658	674.06	31	13	0	1.21389e+09	1.20795e+09	1.19915e+09	1.5638e+09	1.59032e+09	1.56881e+09	1.12701e+09	1.15335e+09	1.12483e+09	Acetyl [N-Term]
High	High	Master Protein	P31930	Cytochrome b-c1 complex subunit 1, mitochondrial OS=Homo sapiens GN=UQCRC1 PE=1 SV=3	0	0	60	23	573	23	1	480	52.6	6.37	14184	669.94	22	18	0	6.87362e+08	7.13868e+08	7.16994e+08	7.6322e+08	8.27215e+08	7.54488e+08	6.7859e+08	7.1363e+08	6.4376e+08
High	High	Master Protein	O14981	TATA-binding protein-associated factor 172 OS=Homo sapiens GN=BTAF1 PE=1 SV=2	0	0	40	57	548	57	1	1849	206.8	6.52	11644	669.64	56	31	0	2.34508e+08	2.43958e+08	2.22148e+08	2.86316e+08	2.90021e+08	2.88231e+08	2.32793e+08	2.32535e+08	2.3439e+08
High	High	Master Protein	Q12802	A-kinase anchor protein 13 OS=Homo sapiens GN=AKAP13 PE=1 SV=2	0	0	37	61	497	61	1	2813	307.4	5.24	12024	669.07	61	33	0	7.12064e+07	7.26256e+07	7.75004e+07	9.76619e+07	1.13081e+08	9.70899e+07	9.75736e+07	9.74942e+07	9.52346e+07
High	High	Master Protein	P35998	26S protease regulatory subunit 7 OS=Homo sapiens GN=PSMC2 PE=1 SV=3	0	0	68	30	661	29	1	433	48.6	5.95	15165	669.07	29	15	0	1.70765e+09	1.80452e+09	1.66675e+09	2.13312e+09	2.20149e+09	2.13624e+09	1.98032e+09	1.92345e+09	1.82227e+09
High	High	Master Protein	P61513	60S ribosomal protein L37a OS=Homo sapiens GN=RPL37A PE=1 SV=2	0	0	51	5	421	5	1	92	10.3	10.43	9190	668.54	5	3	0	9.62379e+08	9.7386e+08	9.3211e+08	1.10975e+09	1.25821e+09	1.22075e+09	1.14122e+09	1.35029e+09	1.34378e+09
High	High	Master Protein	Q96AE4	Far upstream element-binding protein 1 OS=Homo sapiens GN=FUBP1 PE=1 SV=3	0	0	59	35	880	29	1	644	67.5	7.61	21949	668.53	34	17	4	1.67168e+09	1.84544e+09	1.68225e+09	2.50851e+09	2.44535e+09	2.50548e+09	2.59145e+09	2.53398e+09	2.4806e+09	Acetyl [N-Term]
High	High	Master Protein	P62191	26S protease regulatory subunit 4 OS=Homo sapiens GN=PSMC1 PE=1 SV=1	0	0	77	32	573	30	1	440	49.2	6.21	13692	668.31	32	14	0	8.71999e+08	9.39282e+08	9.4945e+08	1.17146e+09	1.22628e+09	1.18145e+09	1.03354e+09	1.05853e+09	1.01619e+09
High	High	Master Protein	Q9GZR7	ATP-dependent RNA helicase DDX24 OS=Homo sapiens GN=DDX24 PE=1 SV=1	0	0	51	34	519	34	1	859	96.3	9.06	11949	668.21	34	20	0	1.64792e+08	1.65957e+08	1.55454e+08	2.52638e+08	2.61698e+08	2.70399e+08	2.74142e+08	2.83679e+08	2.65129e+08
High	High	Master Protein	P49750	YLP motif-containing protein 1 OS=Homo sapiens GN=YLPM1 PE=1 SV=3	0	0	41	63	646	63	1	1951	219.8	6.57	14404	667.73	62	30	0	4.18753e+08	4.22826e+08	4.18948e+08	4.95056e+08	5.44557e+08	5.37344e+08	4.09858e+08	4.31545e+08	4.37323e+08
High	High	Master Protein	P55010	Eukaryotic translation initiation factor 5 OS=Homo sapiens GN=EIF5 PE=1 SV=2	0	0	50	27	609	27	1	431	49.2	5.58	13831	667.51	26	13	0	6.99284e+08	7.08427e+08	6.6381e+08	9.13541e+08	9.14678e+08	8.83422e+08	8.78617e+08	8.54207e+08	8.1709e+08
High	High	Master Protein	P63220	40S ribosomal protein S21 OS=Homo sapiens GN=RPS21 PE=1 SV=1	0	0	60	6	443	6	1	83	9.1	8.5	11867	667.35	6	5	0	1.75341e+09	1.87329e+09	1.88358e+09	2.14244e+09	2.20308e+09	2.29077e+09	1.9407e+09	2.11442e+09	2.03202e+09	Acetyl [N-Term]
High	High	None	Q58FF7	Putative heat shock protein HSP 90-beta-3 OS=Homo sapiens GN=HSP90AB3P PE=5 SV=1	0	0	24	21	1204	12	1	597	68.3	4.79	26376	666.7	21	14	0	1.51142e+10	1.84763e+10	1.74475e+10	2.09911e+10	1.92802e+10	1.90355e+10	1.92048e+10	1.73424e+10	1.69099e+10
High	High	Master Protein	O43592	Exportin-T OS=Homo sapiens GN=XPOT PE=1 SV=2	0	0	51	35	577	35	1	962	109.9	5.39	13477	664.48	35	23	0	7.32416e+08	7.66168e+08	7.34468e+08	8.73156e+08	9.32777e+08	9.09141e+08	8.49365e+08	8.99829e+08	8.88867e+08	Acetyl [N-Term]
High	High	Master Protein	P53992	Protein transport protein Sec24C OS=Homo sapiens GN=SEC24C PE=1 SV=3	0	0	49	38	644	35	1	1094	118.2	7.06	15572	663.33	38	24	3	7.12991e+08	7.07831e+08	6.79349e+08	1.00939e+09	983249930	9.71383e+08	9.36914e+08	9.57702e+08	9.66986e+08
High	High	Master Protein	P04264	Keratin, type II cytoskeletal 1 OS=Homo sapiens GN=KRT1 PE=1 SV=6	0	0	49	37	584	29	1	644	66	8.12	15284	663.05	36	20	1	5.45525e+08	5.61096e+08	5.38215e+08	6.96599e+08	6.85069e+08	6.6458e+08	9.51012e+08	9.38668e+08	9.05989e+08
High	High	Master Protein	Q16576	Histone-binding protein RBBP7 OS=Homo sapiens GN=RBBP7 PE=1 SV=1	0	0	64	22	539	15	1	425	47.8	5.05	12757	662.84	22	11	8	1.53653e+09	1.68682e+09	1.74846e+09	1.83917e+09	2.00566e+09	2.04136e+09	1.51996e+09	1.55436e+09	1.44191e+09
High	High	Master Protein	Q86UE4	Protein LYRIC OS=Homo sapiens GN=MTDH PE=1 SV=2	0	0	62	30	540	30	1	582	63.8	9.32	14373	662.66	27	21	0	4.84146e+08	4.9419e+08	4.93394e+08	6.20181e+08	6.39734e+08	6.38148e+08	5.94048e+08	6.19887e+08	5.90061e+08	Acetyl [N-Term]
High	High	Master Protein	O75521	Enoyl-CoA delta isomerase 2, mitochondrial OS=Homo sapiens GN=ECI2 PE=1 SV=4	0	0	53	16	441	16	1	394	43.6	9	10052	662.24	16	13	0	4.80297e+08	488865370	4.65076e+08	5.98761e+08	5.93818e+08	5.82015e+08	5.8624e+08	5.35637e+08	5.41572e+08
High	High	Master Protein	Q641Q2	WASH complex subunit 2A OS=Homo sapiens GN=WASHC2A PE=1 SV=3	0	0	50	46	496	15	1	1341	147.1	4.81	11959	661.81	44	32	30	1.73837e+08	184124899	1.60853e+08	2.41278e+08	2.43275e+08	2.46758e+08	2.12385e+08	2.17181e+08	2.13103e+08
High	High	Master Protein	P68133	Actin, alpha skeletal muscle OS=Homo sapiens GN=ACTA1 PE=1 SV=1	0	0	48	17	1228	3	1	377	42	5.39	29036	660.63	15	8	0	5.022e+09	4.20467e+09	4.10763e+09	3.48823e+09	3.31437e+09	3.16873e+09	3.98937e+09	4.1285e+09	2.85287e+09
High	High	Master Protein	P30876	DNA-directed RNA polymerase II subunit RPB2 OS=Homo sapiens GN=POLR2B PE=1 SV=1	0	0	48	47	595	47	1	1174	133.8	6.87	13408	660.25	47	26	0	3.09189e+08	3.29034e+08	3.23846e+08	4.18771e+08	4.32039e+08	4.24359e+08	3.67486e+08	3.68013e+08	3.68327e+08
High	High	Master Protein	Q05655	Protein kinase C delta type OS=Homo sapiens GN=PRKCD PE=1 SV=2	0	0	63	37	541	36	1	676	77.5	7.75	14501	660.1	37	22	2	3.76018e+08	3.85821e+08	3.67126e+08	4.79243e+08	5.26015e+08	5.22019e+08	5.28449e+08	5.26949e+08	5.18513e+08
High	High	Master Protein	P30050	60S ribosomal protein L12 OS=Homo sapiens GN=RPL12 PE=1 SV=1	0	0	59	7	492	7	1	165	17.8	9.42	11786	659.11	7	5	0	2.38887e+09	2.38793e+09	2.26468e+09	3.41072e+09	3.24247e+09	3.20158e+09	3.00378e+09	2.88232e+09	2.78557e+09
High	High	Master Protein	P26358	DNA (cytosine-5)-methyltransferase 1 OS=Homo sapiens GN=DNMT1 PE=1 SV=2	0	0	45	61	628	61	1	1616	183.1	7.75	14006	658.97	59	31	0	2.30719e+08	2.45338e+08	2.41656e+08	3.13879e+08	3.11081e+08	3.04019e+08	1.93569e+08	1.98101e+08	1.87782e+08
High	High	Master Protein	Q8WWM7	Ataxin-2-like protein OS=Homo sapiens GN=ATXN2L PE=1 SV=2	0	0	49	40	626	39	1	1075	113.3	8.59	13794	657.91	40	18	1	6.14129e+08	6.47306e+08	6.56737e+08	9.16521e+08	8.96009e+08	8.8062e+08	7.63207e+08	7.73476e+08	7.70643e+08	Acetyl [N-Term]
High	High	Master Protein	Q7Z4S6	Kinesin-like protein KIF21A OS=Homo sapiens GN=KIF21A PE=1 SV=2	0	0	31	39	450	38	1	1674	187.1	6.42	12181	657.48	37	23	1	8.42752e+07	8.99847e+07	8.42728e+07	1.20306e+08	1.28123e+08	1.18129e+08	1.12922e+08	1.18876e+08	1.09114e+08	Acetyl [N-Term]
High	High	Master Protein	A0AVT1	Ubiquitin-like modifier-activating enzyme 6 OS=Homo sapiens GN=UBA6 PE=1 SV=1	0	0	63	51	631	51	1	1052	117.9	6.14	13304	656.75	51	25	0	654610888	6.13748e+08	5.96589e+08	7.86041e+08	8.0114e+08	8.04412e+08	7.60335e+08	7.73324e+08	7.49655e+08	Acetyl [N-Term]
High	High	None	P68032	Actin, alpha cardiac muscle 1 OS=Homo sapiens GN=ACTC1 PE=1 SV=1	0	0	41	16	1227	2	1	377	42	5.39	29036	656.51	15	7	0	5.022e+09	4.20467e+09	4.10763e+09	3.48823e+09	3.31437e+09	3.16873e+09	3.98937e+09	4.1285e+09	2.85287e+09
High	High	Master Protein	Q16513	Serine/threonine-protein kinase N2 OS=Homo sapiens GN=PKN2 PE=1 SV=1	0	0	52	45	556	41	1	984	112	6.3	12618	656.16	45	23	4	2.36353e+08	2.52378e+08	2.45603e+08	2.8322e+08	2.85121e+08	2.81995e+08	268323358	2.61231e+08	2.51818e+08	Acetyl [N-Term]
High	High	Master Protein	Q14103	Heterogeneous nuclear ribonucleoprotein D0 OS=Homo sapiens GN=HNRNPD PE=1 SV=1	0	0	37	18	615	15	1	355	38.4	7.81	14217	655.36	18	13	3	4.45735e+09	4.39098e+09	4.09101e+09	4.74584e+09	4.4158e+09	4.47751e+09	5.10169e+09	4.98822e+09	4.97945e+09
High	High	Master Protein	Q9UK76	Hematological and neurological expressed 1 protein OS=Homo sapiens GN=HN1 PE=1 SV=3	0	0	80	14	423	14	1	154	16	5.6	9426	654.84	14	10	0	1.88493e+09	1.72164e+09	1.75238e+09	1.60418e+09	1.82183e+09	1.78801e+09	1.50219e+09	1.70901e+09	1.63407e+09	Acetyl [N-Term]
High	High	Master Protein	Q15154	Pericentriolar material 1 protein OS=Homo sapiens GN=PCM1 PE=1 SV=4	0	0	43	71	641	70	1	2024	228.4	5.02	15835	653.9	71	40	0	2.30823e+08	2.2377e+08	2.32759e+08	2.64071e+08	2.79567e+08	2.80291e+08	2.78263e+08	2.67269e+08	2.58336e+08	Acetyl [N-Term]
High	High	None	P63267	Actin, gamma-enteric smooth muscle OS=Homo sapiens GN=ACTG2 PE=1 SV=1	0	0	39	15	1013	2	1	376	41.9	5.48	24499	653.24	14	6	0	5.022e+09	4.20467e+09	4.10763e+09	3.48823e+09	3.31437e+09	3.16873e+09	3.98937e+09	4.1285e+09	2.85287e+09
High	High	None	P62736	Actin, aortic smooth muscle OS=Homo sapiens GN=ACTA2 PE=1 SV=1	0	0	38	15	1013	2	1	377	42	5.39	24499	653.24	14	6	0	5.022e+09	4.20467e+09	4.10763e+09	3.48823e+09	3.31437e+09	3.16873e+09	3.98937e+09	4.1285e+09	2.85287e+09
High	High	Master Protein	Q9NR45	Sialic acid synthase OS=Homo sapiens GN=NANS PE=1 SV=2	0	0	68	21	551	21	1	359	40.3	6.74	14062	651.87	21	13	0	9.75206e+08	9.61585e+08	9.20025e+08	1.27171e+09	1.2773e+09	1.24706e+09	1.06339e+09	1.0642e+09	1.06409e+09
High	High	Master Protein	Q9UHD8	Septin-9 OS=Homo sapiens GN=SEPT9 PE=1 SV=2	0	0	74	44	682	43	1	586	65.4	8.97	15854	651.73	44	22	2	1.33259e+09	1.38762e+09	1.32184e+09	1.65263e+09	1.73768e+09	1.69912e+09	1.46143e+09	1.40656e+09	1.40043e+09
High	High	Master Protein	Q9BQ52	Zinc phosphodiesterase ELAC protein 2 OS=Homo sapiens GN=ELAC2 PE=1 SV=2	0	0	64	39	502	39	1	826	92.2	7.9	10954	651.28	39	24	0	2.78854e+08	287022679	2.84507e+08	3.72508e+08	3.74529e+08	3.87302e+08	3.93639e+08	394648106	3.68681e+08
High	High	Master Protein	P21281	V-type proton ATPase subunit B, brain isoform OS=Homo sapiens GN=ATP6V1B2 PE=1 SV=3	0	0	79	30	512	30	1	511	56.5	5.81	11713	650.12	30	22	0	6.33667e+08	6.13507e+08	5.98054e+08	7.70275e+08	7.89462e+08	7.80573e+08	7.87479e+08	7.7118e+08	7.38398e+08
High	High	Master Protein	Q99615	DnaJ homolog subfamily C member 7 OS=Homo sapiens GN=DNAJC7 PE=1 SV=2	0	0	72	42	728	42	1	494	56.4	6.96	16149	648.77	42	19	0	7.96042e+08	8.4682e+08	8.19215e+08	9.28625e+08	9.92565e+08	9.65471e+08	9.11668e+08	9.08174e+08	8.78854e+08	Acetyl [N-Term]
High	High	Master Protein	Q96PK6	RNA-binding protein 14 OS=Homo sapiens GN=RBM14 PE=1 SV=2	0	0	49	34	563	34	1	669	69.4	9.67	14177	647	34	8	0	1.07901e+09	1.15043e+09	1.0139e+09	1.21533e+09	1275782046	1.26149e+09	1.21367e+09	1.19106e+09	1.12199e+09
High	High	Master Protein	O75131	Copine-3 OS=Homo sapiens GN=CPNE3 PE=1 SV=1	0	0	60	28	719	27	1	537	60.1	5.85	15968	646.89	28	12	1	3.94199e+09	4.2513e+09	4.01839e+09	4.87463e+09	4.95326e+09	4.96129e+09	4.65012e+09	4.71824e+09	4.61395e+09	Acetyl [N-Term]
High	High	Master Protein	Q9BQG0	Myb-binding protein 1A OS=Homo sapiens GN=MYBBP1A PE=1 SV=2	0	0	57	66	824	66	1	1328	148.8	9.28	19307	646.53	65	32	0	8.44378e+08	8.38446e+08	8.38226e+08	1.06563e+09	1.09058e+09	1.07154e+09	1.15051e+09	1.09927e+09	1.08323e+09	Acetyl [N-Term]
High	High	Master Protein	P31689	DnaJ homolog subfamily A member 1 OS=Homo sapiens GN=DNAJA1 PE=1 SV=2	0	0	57	23	466	23	1	397	44.8	7.08	10608	645.58	23	13	0	7.0796e+08	7.7366e+08	7.79473e+08	936353675	9.97291e+08	1045600011	8.02993e+08	8.14992e+08	8.32766e+08
High	High	Master Protein	Q8IX12	Cell division cycle and apoptosis regulator protein 1 OS=Homo sapiens GN=CCAR1 PE=1 SV=2	0	0	41	49	722	47	1	1150	132.7	5.76	16327	644.57	48	20	2	7.98363e+08	8.40982e+08	8.10654e+08	1.00972e+09	1.0462e+09	1.06613e+09	8.75271e+08	8.87836e+08	9.02706e+08
High	High	Master Protein	Q12873	Chromodomain-helicase-DNA-binding protein 3 OS=Homo sapiens GN=CHD3 PE=1 SV=3	0	0	39	70	620	47	1	2000	226.5	7.3	13365	644.46	70	28	6	1.18296e+08	1.20975e+08	1.24076e+08	1.61487e+08	1.59011e+08	1.54137e+08	1.38826e+08	1.37633e+08	1.41097e+08
High	High	Master Protein	O95671	N-acetylserotonin O-methyltransferase-like protein OS=Homo sapiens GN=ASMTL PE=1 SV=3	0	0	42	23	438	23	1	621	68.8	6.07	11100	644.32	23	15	0	2.64603e+08	2.74211e+08	2.61757e+08	3.35285e+08	3.55309e+08	3.45261e+08	3.52522e+08	3.94586e+08	3.58575e+08
High	High	None	B2RPK0	Putative high mobility group protein B1-like 1 OS=Homo sapiens GN=HMGB1P1 PE=5 SV=1	0	0	29	10	486	5	1	211	24.2	6.21	11778	642.95	10	8	0	2.12741e+09	2.06071e+09	1.97483e+09	2.46941e+09	2.57596e+09	2.70437e+09	2.22359e+09	2.38712e+09	2.2056e+09
High	High	Master Protein	P23381	Tryptophan--tRNA ligase, cytoplasmic OS=Homo sapiens GN=WARS PE=1 SV=2	0	0	74	28	546	28	1	471	53.1	6.23	12928	641.01	27	19	0	1.15144e+09	1.18516e+09	1.11223e+09	1.6752e+09	1.73614e+09	1.75176e+09	1.61697e+09	1.63336e+09	1.67096e+09
High	High	Master Protein	Q9BYT8	Neurolysin, mitochondrial OS=Homo sapiens GN=NLN PE=1 SV=1	0	0	47	30	445	30	1	704	80.6	6.64	8890	641	30	16	0	4.18946e+08	4.22274e+08	3.84696e+08	5.80099e+08	5.24796e+08	5.2806e+08	4.71839e+08	4.63213e+08	4.58453e+08
High	High	Master Protein	Q92905	COP9 signalosome complex subunit 5 OS=Homo sapiens GN=COPS5 PE=1 SV=4	0	0	65	18	447	18	1	334	37.6	6.54	9769	640.85	17	13	0	3.85234e+08	3.93492e+08	3.88338e+08	4.7253e+08	4.87006e+08	4.99396e+08	4.623e+08	4.48565e+08	4.4394e+08	Acetyl [N-Term]
High	High	Master Protein	P05387	60S acidic ribosomal protein P2 OS=Homo sapiens GN=RPLP2 PE=1 SV=1	0	0	93	9	381	8	1	115	11.7	4.54	10109	640.81	9	6	1	4.45093e+09	4.60881e+09	4.18849e+09	5.08356e+09	5.50678e+09	5.43258e+09	5.5046e+09	5.16162e+09	4.95163e+09
High	High	Master Protein	P52292	Importin subunit alpha-1 OS=Homo sapiens GN=KPNA2 PE=1 SV=1	0	0	49	18	475	18	1	529	57.8	5.4	13230	640.2	18	11	0	7.15506e+08	7.95389e+08	7.74511e+08	9.31512e+08	9.10643e+08	9.63059e+08	5.6516e+08	6.40699e+08	7.11147e+08	Acetyl [N-Term]
High	High	Master Protein	Q13564	NEDD8-activating enzyme E1 regulatory subunit OS=Homo sapiens GN=NAE1 PE=1 SV=1	0	0	66	27	475	27	1	534	60.2	5.4	9811	639.79	27	15	0	5.41986e+08	5.36406e+08	5.17957e+08	6.97799e+08	7.33777e+08	7.44339e+08	5.91068e+08	5.95812e+08	6.04357e+08
High	High	Master Protein	P28066	Proteasome subunit alpha type-5 OS=Homo sapiens GN=PSMA5 PE=1 SV=3	0	0	66	12	441	12	1	241	26.4	4.79	10414	639.75	12	10	0	1.31173e+09	1.45149e+09	1.36827e+09	1.54843e+09	1.60654e+09	1.59108e+09	1.45668e+09	1.46368e+09	1.4273e+09
High	High	Master Protein	Q8N1G4	Leucine-rich repeat-containing protein 47 OS=Homo sapiens GN=LRRC47 PE=1 SV=1	0	0	70	37	595	37	1	583	63.4	8.28	15385	638.76	36	17	0	9.17681e+08	1.00897e+09	9.37465e+08	1.36175e+09	1.43183e+09	1.3373e+09	1.07691e+09	1.13102e+09	1.06987e+09	Acetyl [N-Term]
High	High	Master Protein	P31946	14-3-3 protein beta/alpha OS=Homo sapiens GN=YWHAB PE=1 SV=3	0	0	63	15	793	7	1	246	28.1	4.83	19224	638.37	15	8	0	2416017395	2.10399e+09	2.02843e+09	2.61057e+09	2.74347e+09	2.82204e+09	2.69437e+09	2.89983e+09	2.64322e+09
High	High	Master Protein	P26368	Splicing factor U2AF 65 kDa subunit OS=Homo sapiens GN=U2AF2 PE=1 SV=4	0	0	51	17	442	17	1	475	53.5	9.09	9138	638.15	17	9	0	1.04274e+09	1.0271e+09	9.47383e+08	1.26169e+09	1.24789e+09	1.15498e+09	1.0909e+09	1.13888e+09	1.00838e+09	Acetyl [N-Term]
High	High	Master Protein	P48735	Isocitrate dehydrogenase [NADP], mitochondrial OS=Homo sapiens GN=IDH2 PE=1 SV=2	0	0	56	27	790	25	1	452	50.9	8.69	20728	637.06	27	12	2	2.2417e+09	2.35639e+09	2.27125e+09	2.93367e+09	2.83963e+09	2.98314e+09	2.57871e+09	2.70686e+09	2.51019e+09
High	High	Master Protein	P30566	Adenylosuccinate lyase OS=Homo sapiens GN=ADSL PE=1 SV=2	0	0	68	29	516	29	1	484	54.9	7.11	12058	636.83	29	19	0	4.53322e+08	4.53645e+08	4.39288e+08	6.28718e+08	6.47055e+08	6.48007e+08	4.67532e+08	4.79513e+08	4.90971e+08	Acetyl [N-Term]
High	High	Master Protein	Q7Z2W4	Zinc finger CCCH-type antiviral protein 1 OS=Homo sapiens GN=ZC3HAV1 PE=1 SV=3	0	0	62	48	566	48	1	902	101.4	8.4	13254	635.89	47	23	0	8.00085e+08	8.95368e+08	8.23491e+08	1.01209e+09	1.05441e+09	1.05708e+09	9.83416e+08	1.00152e+09	9.71489e+08	Acetyl [N-Term]
High	High	Master Protein	Q01844	RNA-binding protein EWS OS=Homo sapiens GN=EWSR1 PE=1 SV=1	0	0	20	11	450	11	1	656	68.4	9.33	12050	635.35	10	7	0	6.16493e+08	7.14129e+08	6.78237e+08	1.0125e+09	1.00884e+09	9.8715e+08	8.85016e+08	8.77733e+08	8.85775e+08
High	High	Master Protein	Q96L91	E1A-binding protein p400 OS=Homo sapiens GN=EP400 PE=1 SV=4	0	0	28	51	402	48	1	3159	343.3	9.19	8653	635.24	50	36	3	4.82219e+07	5.08173e+07	4.87292e+07	6.957e+07	7.43889e+07	7.46967e+07	6.49581e+07	6.66441e+07	6.60149e+07
High	High	Master Protein	P78540	Arginase-2, mitochondrial OS=Homo sapiens GN=ARG2 PE=1 SV=1	0	0	75	17	451	17	1	354	38.6	6.47	11338	634.68	17	10	0	5.24869e+08	5.33464e+08	5.31515e+08	6.20345e+08	6.22328e+08	6.26736e+08	5.40849e+08	5.42096e+08	5.31748e+08
High	High	Master Protein	P82979	SAP domain-containing ribonucleoprotein OS=Homo sapiens GN=SARNP PE=1 SV=3	0	0	61	16	403	16	1	210	23.7	6.42	11644	634.63	16	8	0	4.969e+08	5.47954e+08	5.13521e+08	703550217	6.73372e+08	6.75087e+08	6.7998e+08	6.61896e+08	6.68628e+08	Acetyl [N-Term]
High	High	Master Protein	P07741	Adenine phosphoribosyltransferase OS=Homo sapiens GN=APRT PE=1 SV=2	0	0	66	8	408	8	1	180	19.6	6.02	10018	634.37	8	4	0	1.03872e+09	1.08085e+09	1.06995e+09	1.34872e+09	1.35439e+09	1.3495e+09	1.31024e+09	1.34555e+09	1.19563e+09	Acetyl [N-Term]
High	High	Master Protein	Q05682	Caldesmon OS=Homo sapiens GN=CALD1 PE=1 SV=3	0	0	40	41	699	39	1	793	93.2	5.66	20341	634.07	41	17	2	9.34751e+08	1.00489e+09	9.33878e+08	1.06385e+09	1.08259e+09	1.10456e+09	1.28275e+09	1.31116e+09	1.34896e+09
High	High	Master Protein	P19623	Spermidine synthase OS=Homo sapiens GN=SRM PE=1 SV=1	0	0	80	17	495	17	1	302	33.8	5.49	10925	633.93	17	10	0	1.08598e+09	1.10937e+09	1.12504e+09	1.4693e+09	1.487e+09	1.51182e+09	1.52802e+09	1.48307e+09	1.39361e+09	Acetyl [N-Term]
High	High	Master Protein	P47755	F-actin-capping protein subunit alpha-2 OS=Homo sapiens GN=CAPZA2 PE=1 SV=3	0	0	77	15	375	12	1	286	32.9	5.85	8000	633.45	15	11	0	1.77414e+08	1.83829e+08	1.68875e+08	2.09064e+08	2.4616e+08	2.03335e+08	2.30072e+08	2.20496e+08	1.98091e+08	Acetyl [N-Term]
High	High	Master Protein	O43396	Thioredoxin-like protein 1 OS=Homo sapiens GN=TXNL1 PE=1 SV=3	0	0	69	21	484	21	1	289	32.2	4.96	11803	633.03	21	14	0	6.92902e+08	6.8581e+08	6.90597e+08	9.22643e+08	9.18131e+08	9.54415e+08	9.87492e+08	9.46885e+08	892537002	Acetyl [N-Term]
High	High	Master Protein	Q9Y2W1	Thyroid hormone receptor-associated protein 3 OS=Homo sapiens GN=THRAP3 PE=1 SV=2	0	0	43	43	844	41	1	955	108.6	10.15	20979	632.67	43	21	0	1.23971e+09	1.29001e+09	1.21298e+09	1.64534e+09	1.61438e+09	1.66961e+09	1.30401e+09	1.24738e+09	1.18965e+09
High	High	Master Protein	O43852	Calumenin OS=Homo sapiens GN=CALU PE=1 SV=2	0	0	68	20	487	20	1	315	37.1	4.64	10477	632.07	20	12	0	6.64775e+08	6.06674e+08	6.53411e+08	7.14309e+08	7.55646e+08	7.49545e+08	7.76767e+08	8.13716e+08	7.70112e+08
High	High	Master Protein	Q8NHW5	60S acidic ribosomal protein P0-like OS=Homo sapiens GN=RPLP0P6 PE=5 SV=1	0	0	41	11	478	1	1	317	34.3	5.55	9561	630.7	11	7	0
High	High	Master Protein	Q2M2I8	AP2-associated protein kinase 1 OS=Homo sapiens GN=AAK1 PE=1 SV=3	0	0	47	31	413	30	1	961	103.8	6.6	10250	628.76	31	19	1	1.16915e+08	1.1756e+08	1.20163e+08	1.38235e+08	1.53954e+08	1.49807e+08	1.80949e+08	1.94379e+08	1.05775e+08
High	High	Master Protein	Q00577	Transcriptional activator protein Pur-alpha OS=Homo sapiens GN=PURA PE=1 SV=2	0	0	75	18	395	16	1	322	34.9	6.44	9327	628.14	18	9	2	7.57929e+08	6.85242e+08	7.18776e+08	1.01272e+09	9.77238e+08	9.57916e+08	9.19626e+08	8.62111e+08	8.1659e+08
High	High	Master Protein	P46379	Large proline-rich protein BAG6 OS=Homo sapiens GN=BAG6 PE=1 SV=2	0	0	50	40	607	40	1	1132	119.3	5.6	15573	624.83	39	21	0	6.23804e+08	6.64983e+08	6.10941e+08	8.48084e+08	8.86992e+08	8.49056e+08	8.7103e+08	8.67206e+08	8.15076e+08	Acetyl [N-Term]
High	High	Master Protein	Q9H2K8	Serine/threonine-protein kinase TAO3 OS=Homo sapiens GN=TAOK3 PE=1 SV=2	0	0	47	41	526	35	1	898	105.3	7.3	12265	624.69	41	19	7	5.02134e+08	5.00774e+08	4.74354e+08	6.53052e+08	6.53744e+08	6.57146e+08	6.08841e+08	5.79755e+08	5.86071e+08
High	High	Master Protein	P39687	Acidic leucine-rich nuclear phosphoprotein 32 family member A OS=Homo sapiens GN=ANP32A PE=1 SV=1	0	0	45	15	513	11	1	249	28.6	4.09	11599	624.45	15	6	4	2.70136e+09	2.86895e+09	2.68549e+09	3.54582e+09	3.45639e+09	3.4787e+09	3.3116e+09	3.38066e+09	3.26087e+09
High	High	Master Protein	P15559	NAD(P)H dehydrogenase [quinone] 1 OS=Homo sapiens GN=NQO1 PE=1 SV=1	0	0	49	17	453	17	1	274	30.8	8.88	10045	624.23	17	10	0	8.37948e+08	7.18187e+08	6.94298e+08	1.13038e+09	1.11375e+09	1.10896e+09	1.37523e+09	1.27683e+09	1.2726e+09
High	High	Master Protein	Q8TC12	Retinol dehydrogenase 11 OS=Homo sapiens GN=RDH11 PE=1 SV=2	0	0	60	13	449	13	1	318	35.4	8.82	10059	624.15	13	12	0	8.06853e+08	7.9354e+08	7.58099e+08	1.03801e+09	1092745463	1.05453e+09	8.5958e+08	8.51103e+08	8.23181e+08
High	High	Master Protein	P49756	RNA-binding protein 25 OS=Homo sapiens GN=RBM25 PE=1 SV=3	0	0	37	38	653	37	1	843	100.1	6.32	15255	623.66	38	15	0	5.33203e+08	5.25052e+08	5.07075e+08	6.47562e+08	6.48185e+08	6.45611e+08	5.88862e+08	5.98964e+08	5.77821e+08
High	High	Master Protein	P31942	Heterogeneous nuclear ribonucleoprotein H3 OS=Homo sapiens GN=HNRNPH3 PE=1 SV=2	0	0	71	18	479	16	1	346	36.9	6.87	11099	623.59	18	13	0	3.32213e+08	3.47188e+08	3.28172e+08	4.73027e+08	4.67885e+08	4.43451e+08	4.25653e+08	4.12414e+08	4.00605e+08	Acetyl [N-Term]
High	High	Master Protein	Q99575	Ribonucleases P/MRP protein subunit POP1 OS=Homo sapiens GN=POP1 PE=1 SV=2	0	0	54	42	446	42	1	1024	114.6	9.22	10294	623.49	42	27	0	2.11995e+08	2.27025e+08	2.17487e+08	3.00704e+08	2.93236e+08	3.06942e+08	2.47965e+08	2.57081e+08	2.35498e+08
High	High	Master Protein	P15880	40S ribosomal protein S2 OS=Homo sapiens GN=RPS2 PE=1 SV=2	0	0	56	15	613	15	1	293	31.3	10.24	15886	622.54	15	6	0	2.01616e+09	2.04294e+09	1.94185e+09	2.83933e+09	2.87275e+09	2.99552e+09	3.10441e+09	2.80802e+09	2.89653e+09	Acetyl [N-Term]
High	High	Master Protein	Q96N67	Dedicator of cytokinesis protein 7 OS=Homo sapiens GN=DOCK7 PE=1 SV=4	0	0	40	69	586	61	1	2140	242.4	6.8	13524	621.79	69	32	8	3.32172e+08	3.28037e+08	3.21389e+08	4.34349e+08	4.40541e+08	4.42941e+08	3.84782e+08	3.84924e+08	3.78621e+08
High	High	Master Protein	Q8NEU8	DCC-interacting protein 13-beta OS=Homo sapiens GN=APPL2 PE=1 SV=3	0	0	75	36	436	36	1	664	74.4	4.94	9387	621.43	36	24	0	1.9426e+08	1.88341e+08	1.94404e+08	2.6219e+08	2.6476e+08	2.72359e+08	1.98944e+08	1.92162e+08	1.84839e+08
High	High	Master Protein	O95782	AP-2 complex subunit alpha-1 OS=Homo sapiens GN=AP2A1 PE=1 SV=3	0	0	56	45	654	37	1	977	107.5	7.03	13831	620.5	45	21	8	7.61758e+08	7.44768e+08	7.65872e+08	9.62711e+08	9.70778e+08	9.86271e+08	9.79465e+08	1.01615e+09	9.50857e+08
High	High	Master Protein	Q13428	Treacle protein OS=Homo sapiens GN=TCOF1 PE=1 SV=3	0	0	33	48	615	48	1	1488	152	9.04	16803	619.64	48	27	0	5.26687e+08	5.67557e+08	5.72159e+08	6.3262e+08	6.50045e+08	6.23632e+08	5.59096e+08	5.55658e+08	5.18578e+08
High	High	Master Protein	P48444	Coatomer subunit delta OS=Homo sapiens GN=ARCN1 PE=1 SV=1	0	0	57	34	648	34	1	511	57.2	6.21	16076	617.14	34	15	0	1.23703e+09	1.22346e+09	1.24047e+09	1.62424e+09	1.72096e+09	1.68706e+09	1.30633e+09	1.34603e+09	1.35916e+09
High	High	Master Protein	O15067	Phosphoribosylformylglycinamidine synthase OS=Homo sapiens GN=PFAS PE=1 SV=4	0	0	45	40	528	40	1	1338	144.6	5.76	12149	617.1	40	23	0	4.51405e+08	4.72109e+08	4.34366e+08	5.18544e+08	5.39732e+08	5.2911e+08	4.68378e+08	4.63719e+08	4.61085e+08
High	High	Master Protein	O75717	WD repeat and HMG-box DNA-binding protein 1 OS=Homo sapiens GN=WDHD1 PE=1 SV=1	0	0	58	53	564	53	1	1129	125.9	5.62	13824	615.59	52	28	0	4.73239e+08	5.09821e+08	4.7188e+08	5.54142e+08	5.65137e+08	5.41052e+08	4.04112e+08	4.41234e+08	4.43038e+08
High	High	Master Protein	P35908	Keratin, type II cytoskeletal 2 epidermal OS=Homo sapiens GN=KRT2 PE=1 SV=2	0	0	67	40	484	32	1	639	65.4	8	12106	615.51	39	22	5	3.74506e+08	4.17232e+08	3.81881e+08	5.21779e+08	5.27737e+08	5.28284e+08	6.13038e+08	6.14334e+08	6.16886e+08
High	High	Master Protein	P46100	Transcriptional regulator ATRX OS=Homo sapiens GN=ATRX PE=1 SV=5	0	0	33	72	624	72	1	2492	282.4	6.58	16252	615.32	66	40	0	1.70375e+08	1.75278e+08	1.65255e+08	205911541	2.27865e+08	2.24809e+08	2.14755e+08	2.07909e+08	1.91977e+08
High	High	Master Protein	Q8WUM0	Nuclear pore complex protein Nup133 OS=Homo sapiens GN=NUP133 PE=1 SV=2	0	0	57	46	552	46	1	1156	128.9	5.1	12662	615.27	45	28	0	3.67696e+08	3.88437e+08	3.69927e+08	4.40377e+08	4.62529e+08	4.70706e+08	3.90562e+08	4.05764e+08	4.41444e+08
High	High	Master Protein	Q5VTR2	E3 ubiquitin-protein ligase BRE1A OS=Homo sapiens GN=RNF20 PE=1 SV=2	0	0	47	51	544	44	1	975	113.6	5.94	12013	615.21	50	26	7	3.8252e+08	3.74723e+08	3.61198e+08	4.34025e+08	4.51296e+08	4.53742e+08	4.21326e+08	4.0376e+08	3.98212e+08
High	High	Master Protein	Q12788	Transducin beta-like protein 3 OS=Homo sapiens GN=TBL3 PE=1 SV=2	0	0	63	38	498	38	1	808	89	6.9	13450	614.73	38	22	0	3.78568e+08	3.79088e+08	3.74178e+08	4.4981e+08	4.43863e+08	4.49198e+08	4.15728e+08	4.25356e+08	4.27188e+08	Acetyl [N-Term]
High	High	Master Protein	Q9UNM6	26S proteasome non-ATPase regulatory subunit 13 OS=Homo sapiens GN=PSMD13 PE=1 SV=2	0	0	74	25	533	25	1	376	42.9	5.81	13544	612.08	25	15	0	1.43701e+09	1.6288e+09	1.40591e+09	1.66898e+09	1.78353e+09	1.74035e+09	1.71774e+09	1.75902e+09	1.6651e+09
High	High	Master Protein	P49773	Histidine triad nucleotide-binding protein 1 OS=Homo sapiens GN=HINT1 PE=1 SV=2	0	0	79	10	481	10	1	126	13.8	6.95	12620	611.13	10	7	0	1.82522e+09	2.14353e+09	1.91545e+09	2.3075e+09	2.51326e+09	2.39851e+09	2.24284e+09	2.30387e+09	2.22352e+09
High	High	Master Protein	Q15084	Protein disulfide-isomerase A6 OS=Homo sapiens GN=PDIA6 PE=1 SV=1	0	0	50	19	509	19	1	440	48.1	5.08	12338	610.64	19	15	0	1.89685e+09	1.82864e+09	1.69718e+09	2.3455e+09	2.28051e+09	2.39614e+09	2.02032e+09	2.09662e+09	2.03518e+09
High	High	Master Protein	Q9UNE7	E3 ubiquitin-protein ligase CHIP OS=Homo sapiens GN=STUB1 PE=1 SV=2	0	0	73	29	525	29	1	303	34.8	5.87	11127	610.61	29	14	0	7.92074e+08	7.85056e+08	7.81475e+08	1.08763e+09	1.05096e+09	1.08261e+09	9.94622e+08	9.97002e+08	1.00239e+09
High	High	Master Protein	Q12874	Splicing factor 3A subunit 3 OS=Homo sapiens GN=SF3A3 PE=1 SV=1	0	0	59	28	454	28	1	501	58.8	5.38	9820	610.3	28	13	0	6.50337e+08	6.92741e+08	6.02483e+08	8.24572e+08	8.35718e+08	8.37141e+08	7.12176e+08	6.43253e+08	6.58383e+08	Acetyl [N-Term]
High	High	Master Protein	O95373	Importin-7 OS=Homo sapiens GN=IPO7 PE=1 SV=1	0	0	40	40	626	39	1	1038	119.4	4.82	15396	610.15	40	23	1	8.66027e+08	9.02526e+08	8.70892e+08	1.04581e+09	1.05591e+09	1.06152e+09	1.01676e+09	1.07984e+09	9.83342e+08	Acetyl [N-Term]
High	High	Master Protein	P49903	Selenide, water dikinase 1 OS=Homo sapiens GN=SEPHS1 PE=1 SV=2	0	0	61	13	375	13	1	392	42.9	5.97	8253	609.69	13	10	0	3.03564e+08	2.99544e+08	2.6848e+08	3.74635e+08	3.81956e+08	363926001	3.61034e+08	3.42779e+08	3.3097e+08
High	High	Master Protein	Q9UBT2	SUMO-activating enzyme subunit 2 OS=Homo sapiens GN=UBA2 PE=1 SV=2	0	0	60	32	459	32	1	640	71.2	5.29	10821	609.24	32	22	0	4.30997e+08	4.61207e+08	4.41566e+08	5.64875e+08	5.88195e+08	6.01701e+08	4.8901e+08	4.91279e+08	4.5067e+08
High	High	Master Protein	Q2TAY7	WD40 repeat-containing protein SMU1 OS=Homo sapiens GN=SMU1 PE=1 SV=2	0	0	55	24	485	24	1	513	57.5	7.18	10805	608.44	23	10	0	5.27047e+08	5.31566e+08	5.06492e+08	5.96094e+08	6.52817e+08	6.59197e+08	6.03218e+08	6.02918e+08	5.73104e+08	Acetyl [N-Term]
High	High	Master Protein	Q13618	Cullin-3 OS=Homo sapiens GN=CUL3 PE=1 SV=2	0	0	55	43	521	42	1	768	88.9	8.48	12462	607.37	41	23	0	3.98268e+08	4.17695e+08	4.09948e+08	5.35732e+08	5.64444e+08	5.47272e+08	4.97019e+08	4.95614e+08	4.99748e+08
High	High	Master Protein	Q68E01	Integrator complex subunit 3 OS=Homo sapiens GN=INTS3 PE=1 SV=1	0	0	47	40	473	40	1	1043	118	5.8	12125	607.35	38	23	0	2.63215e+08	2.71128e+08	2.61334e+08	2.981e+08	3.20374e+08	3.07593e+08	2.69926e+08	2.6776e+08	2.55052e+08
High	High	Master Protein	P52788	Spermine synthase OS=Homo sapiens GN=SMS PE=1 SV=2	0	0	71	20	433	20	1	366	41.2	5.02	8122	606.05	20	11	0	6.01638e+08	6.21103e+08	5.69703e+08	6.91421e+08	5.69615e+08	6.62925e+08	6.46759e+08	5.93474e+08	6.4008e+08
High	High	Master Protein	Q12769	Nuclear pore complex protein Nup160 OS=Homo sapiens GN=NUP160 PE=1 SV=3	0	0	42	47	485	47	1	1436	162	5.5	10784	605.45	45	27	0	2.74166e+08	2.88693e+08	2.71425e+08	2.91062e+08	3.14433e+08	3.1999e+08	2.93417e+08	3.04486e+08	2.83976e+08
High	High	Master Protein	P54727	UV excision repair protein RAD23 homolog B OS=Homo sapiens GN=RAD23B PE=1 SV=1	0	0	51	16	447	14	1	409	43.1	4.84	11058	605.17	16	8	3	1.6468e+09	1.8421e+09	1.66127e+09	2.17596e+09	2.21754e+09	2.19904e+09	2.05457e+09	2.03872e+09	1.93876e+09
High	High	Master Protein	P30622	CAP-Gly domain-containing linker protein 1 OS=Homo sapiens GN=CLIP1 PE=1 SV=2	0	0	46	54	517	49	1	1438	162.1	5.36	12328	604.95	54	28	5	2.11273e+08	2.10461e+08	2.00926e+08	3.06786e+08	3.12009e+08	3.02091e+08	3.03074e+08	2.97804e+08	2.79659e+08
High	High	Master Protein	P27635	60S ribosomal protein L10 OS=Homo sapiens GN=RPL10 PE=1 SV=4	0	0	43	10	482	10	1	214	24.6	10.08	10988	604.35	10	6	0	2.15734e+09	2.00426e+09	1.94389e+09	2.58902e+09	2.56386e+09	2.66138e+09	2.66128e+09	2.50036e+09	2.46985e+09
High	High	Master Protein	Q9BZZ5	Apoptosis inhibitor 5 OS=Homo sapiens GN=API5 PE=1 SV=3	0	0	54	28	517	28	1	524	59	7.34	12517	602.96	28	14	0	5.64375e+08	5.84243e+08	5.39569e+08	7.21359e+08	6.76961e+08	6.84789e+08	6.57027e+08	620550606	6.71699e+08
High	High	Master Protein	P30084	Enoyl-CoA hydratase, mitochondrial OS=Homo sapiens GN=ECHS1 PE=1 SV=4	0	0	62	13	477	13	1	290	31.4	8.07	11989	602.61	13	10	0	1.20205e+09	1320314396	1.25266e+09	1.97141e+09	1.85248e+09	1.74514e+09	1.58587e+09	1.68453e+09	1.74681e+09
High	High	Master Protein	Q9BZH6	WD repeat-containing protein 11 OS=Homo sapiens GN=WDR11 PE=1 SV=1	0	0	59	53	545	53	1	1224	136.6	6.92	12046	602.24	52	28	0	2.26778e+08	2.52055e+08	2.29539e+08	3.11408e+08	3.24004e+08	3.21697e+08	2.85057e+08	3.12873e+08	3.012e+08	Acetyl [N-Term]
High	High	Master Protein	O14617	AP-3 complex subunit delta-1 OS=Homo sapiens GN=AP3D1 PE=1 SV=1	0	0	47	43	535	43	1	1153	130.1	8.48	13378	602.21	43	25	0	3.40211e+08	3.80044e+08	3.50211e+08	4.65847e+08	4.53226e+08	4.3735e+08	4.16351e+08	3.83962e+08	3.93155e+08
High	High	Master Protein	Q9HCE1	Putative helicase MOV-10 OS=Homo sapiens GN=MOV10 PE=1 SV=2	0	0	59	50	569	50	1	1003	113.6	8.82	13310	601.13	48	23	0	4.25163e+08	4.38826e+08	3.9861e+08	5.94468e+08	5.78057e+08	6.04598e+08	5.53762e+08	5.46956e+08	5.5784e+08
High	High	Master Protein	P12236	ADP/ATP translocase 3 OS=Homo sapiens GN=SLC25A6 PE=1 SV=4	0	0	66	24	759	6	1	298	32.8	9.74	14773	600.94	24	9	23	4.43718e+09	4.26116e+09	4.16977e+09	5.23933e+09	5.63971e+09	5.3379e+09	4.22943e+09	4.5325e+09	4.54358e+09	Acetyl [N-Term; N-Term]
High	High	Master Protein	Q5T1M5	FK506-binding protein 15 OS=Homo sapiens GN=FKBP15 PE=1 SV=2	0	0	47	45	499	45	1	1219	133.5	5.2	12583	600.41	44	28	0	2.04706e+08	2.06033e+08	1.78972e+08	2.78377e+08	2.68567e+08	2.7006e+08	2.52597e+08	2.23144e+08	2.32026e+08	Acetyl [N-Term]
High	High	Master Protein	P40855	Peroxisomal biogenesis factor 19 OS=Homo sapiens GN=PEX19 PE=1 SV=1	0	0	63	16	405	16	1	299	32.8	4.34	11033	599.21	16	9	0	1.8652e+08	1.97881e+08	1.86377e+08	2.39034e+08	2.59379e+08	2.70602e+08	2.32503e+08	2.46696e+08	2.61649e+08
High	High	Master Protein	Q9BVP2	Guanine nucleotide-binding protein-like 3 OS=Homo sapiens GN=GNL3 PE=1 SV=2	0	0	49	32	527	30	1	549	62	9.16	13314	598.9	32	16	2	5.4334e+08	5.94617e+08	5.31387e+08	7.5703e+08	7.09607e+08	7.72864e+08	6.37204e+08	6.76548e+08	6.31062e+08
High	High	Master Protein	P62879	Guanine nucleotide-binding protein G(I)/G(S)/G(T) subunit beta-2 OS=Homo sapiens GN=GNB2 PE=1 SV=3	0	0	69	16	430	6	1	340	37.3	6	9164	598.49	16	6	3	188267256	1.76518e+08	1.69636e+08	233301254	2.32006e+08	2.24617e+08	2.21326e+08	2.59857e+08	2.48296e+08	Acetyl [N-Term]
High	High	Master Protein	P10515	Dihydrolipoyllysine-residue acetyltransferase component of pyruvate dehydrogenase complex, mitochondrial OS=Homo sapiens GN=DLAT PE=1 SV=3	0	0	48	23	425	23	1	647	69	7.84	9356	598.41	23	14	0	5.40015e+08	5.34277e+08	5.15447e+08	6.97545e+08	7.08237e+08	6.95401e+08	6.48561e+08	6.3569e+08	6.00456e+08
High	High	Master Protein	P13797	Plastin-3 OS=Homo sapiens GN=PLS3 PE=1 SV=4	0	0	60	36	540	26	1	630	70.8	5.6	13237	597.78	36	18	2	4.30159e+08	4.30785e+08	4.1668e+08	5.14345e+08	5.50319e+08	5.34273e+08	5.59676e+08	5.66803e+08	5.43711e+08	Acetyl [N-Term]
High	High	Master Protein	P33992	DNA replication licensing factor MCM5 OS=Homo sapiens GN=MCM5 PE=1 SV=5	0	0	65	48	712	48	1	734	82.2	8.37	16150	597.77	48	22	0	1.2383e+09	1.29502e+09	1.23446e+09	1.55041e+09	1.53942e+09	1.51502e+09	9.11473e+08	9.84033e+08	9.16082e+08	Acetyl [N-Term]
High	High	Master Protein	P46783	40S ribosomal protein S10 OS=Homo sapiens GN=RPS10 PE=1 SV=1	0	0	57	13	537	13	1	165	18.9	10.15	12932	596.87	13	4	0	1.82525e+09	1.79284e+09	1.64398e+09	2.29903e+09	2.4589e+09	2.44669e+09	2.26602e+09	2.17485e+09	2.18065e+09
High	High	Master Protein	Q9C0C9	(E3-independent) E2 ubiquitin-conjugating enzyme OS=Homo sapiens GN=UBE2O PE=1 SV=3	0	0	51	55	651	55	1	1292	141.2	5.12	14667	596.68	55	28	0	4.76681e+08	5.03631e+08	5.0628e+08	6.05479e+08	6.32473e+08	6.29015e+08	6.47599e+08	6.29914e+08	6.7084e+08
High	High	Master Protein	Q9H3P7	Golgi resident protein GCP60 OS=Homo sapiens GN=ACBD3 PE=1 SV=4	0	0	59	22	432	21	1	528	60.6	5.06	10969	596.48	22	16	0	2.65271e+08	2.68338e+08	2.50447e+08	3.08038e+08	327176720	3.15952e+08	3.2919e+08	3.10914e+08	3.15616e+08	Acetyl [N-Term]
High	High	Master Protein	P62140	Serine/threonine-protein phosphatase PP1-beta catalytic subunit OS=Homo sapiens GN=PPP1CB PE=1 SV=3	0	0	76	24	535	11	1	327	37.2	6.19	11934	596.35	24	12	14	1.38349e+09	1.28953e+09	1.30363e+09	1.54466e+09	1.77858e+09	1.65587e+09	1.58186e+09	1.59933e+09	1.57596e+09	Acetyl [N-Term]
High	High	Master Protein	Q9NVP1	ATP-dependent RNA helicase DDX18 OS=Homo sapiens GN=DDX18 PE=1 SV=2	0	0	56	35	543	35	1	670	75.4	9.5	13969	594.74	35	23	0	4.05223e+08	3.81532e+08	3.81381e+08	5.35036e+08	5.48467e+08	5.72232e+08	4.96352e+08	5.22332e+08	5.2369e+08
High	High	Master Protein	P42345	Serine/threonine-protein kinase mTOR OS=Homo sapiens GN=MTOR PE=1 SV=1	0	0	36	66	539	66	1	2549	288.7	7.17	11626	594.46	66	37	0	1.73451e+08	1.79188e+08	1.77847e+08	2.38297e+08	2.42668e+08	2.43145e+08	2.07537e+08	2.152e+08	2.00327e+08	Acetyl [N-Term]
High	High	Master Protein	P12235	ADP/ATP translocase 1 OS=Homo sapiens GN=SLC25A4 PE=1 SV=4	0	0	62	21	686	5	1	298	33	9.76	12675	594.29	21	8	0	1.9372e+08	1.90951e+08	1.43063e+08	224222188	2.04955e+08	1.92962e+08	1.98731e+08	1.89578e+08	1.94966e+08	Acetyl [N-Term]
High	High	Master Protein	P60891	Ribose-phosphate pyrophosphokinase 1 OS=Homo sapiens GN=PRPS1 PE=1 SV=2	0	0	59	17	468	7	1	318	34.8	6.98	11837	593.62	17	10	13	1.16908e+09	1.21863e+09	1.22491e+09	1.323e+09	1.47756e+09	1.40095e+09	1258248947	1.20079e+09	1.14604e+09
High	High	Master Protein	O43504	Ragulator complex protein LAMTOR5 OS=Homo sapiens GN=LAMTOR5 PE=1 SV=1	0	0	97	5	304	5	1	91	9.6	4.87	8205	593.13	5	4	0	2.54039e+08	2.55753e+08	2.2087e+08	3.73009e+08	3.84041e+08	3.70794e+08	3.67796e+08	3.24619e+08	3.10926e+08	Acetyl [N-Term]
High	High	Master Protein	Q8N1F7	Nuclear pore complex protein Nup93 OS=Homo sapiens GN=NUP93 PE=1 SV=2	0	0	66	51	608	51	1	819	93.4	5.72	14611	592.68	51	22	0	1.11556e+09	1.16593e+09	1.15013e+09	1.34962e+09	1.39354e+09	1.40097e+09	1.22692e+09	1.18566e+09	1.13575e+09
High	High	Master Protein	P55268	Laminin subunit beta-2 OS=Homo sapiens GN=LAMB2 PE=1 SV=2	0	0	54	64	565	64	1	1798	195.9	6.52	14590	592.09	63	30	0	2.92046e+08	3.0125e+08	2.81494e+08	4.25837e+08	3.87392e+08	3.98417e+08	3.76922e+08	3.78958e+08	3.67599e+08
High	High	Master Protein	Q92734	Protein TFG OS=Homo sapiens GN=TFG PE=1 SV=2	0	0	46	16	371	16	1	400	43.4	5.1	8593	591.54	16	10	0	5.77562e+08	6.03509e+08	5.75188e+08	8.27963e+08	7.53709e+08	7.1833e+08	7.58749e+08	7.06337e+08	7.62585e+08	Acetyl [N-Term]
High	High	Master Protein	P10155	60 kDa SS-A/Ro ribonucleoprotein OS=Homo sapiens GN=TROVE2 PE=1 SV=2	0	0	62	29	528	29	1	538	60.6	8.03	11337	590.35	29	16	0	8.54784e+08	7.84138e+08	7.75533e+08	1.05929e+09	1.07409e+09	1.08325e+09	9.92114e+08	9.75335e+08	9.84688e+08	Acetyl [N-Term]
High	High	Master Protein	Q12756	Kinesin-like protein KIF1A OS=Homo sapiens GN=KIF1A PE=1 SV=2	0	0	43	53	519	39	1	1690	190.9	6.21	11755	589.5	52	27	15	2.20837e+08	2.19168e+08	2.09986e+08	2.9287e+08	2.94516e+08	3.00176e+08	2.86559e+08	2.97039e+08	2.87999e+08
High	High	Master Protein	P48147	Prolyl endopeptidase OS=Homo sapiens GN=PREP PE=1 SV=2	0	0	72	43	527	43	1	710	80.6	5.86	11992	589.36	43	19	0	4.73561e+08	5.09096e+08	4.97939e+08	6.44679e+08	5.99936e+08	5.95797e+08	6.16005e+08	5.78491e+08	5.71949e+08	Acetyl [N-Term]
High	High	Master Protein	P09622	Dihydrolipoyl dehydrogenase, mitochondrial OS=Homo sapiens GN=DLD PE=1 SV=2	0	0	41	17	433	17	1	509	54.1	7.85	10416	589.34	17	11	0	1.30036e+09	1.45056e+09	1433071103	1.75657e+09	2.00394e+09	2.05392e+09	1.66099e+09	1.6925e+09	1.72781e+09
High	High	Master Protein	Q15021	Condensin complex subunit 1 OS=Homo sapiens GN=NCAPD2 PE=1 SV=3	0	0	51	54	592	54	1	1401	157.1	6.61	14230	588.8	53	26	0	5.09573e+08	5.24464e+08	5.12226e+08	5.2069e+08	5.57594e+08	5.53979e+08	3.88598e+08	3.96073e+08	3.92362e+08
High	High	Master Protein	Q96AY3	Peptidyl-prolyl cis-trans isomerase FKBP10 OS=Homo sapiens GN=FKBP10 PE=1 SV=1	0	0	55	29	571	28	1	582	64.2	5.62	12893	588.4	29	14	1	6.05657e+08	6.38547e+08	6.39468e+08	8.49211e+08	9.02874e+08	8.69336e+08	8.04643e+08	7.95656e+08	8.14708e+08
High	High	Master Protein	Q99614	Tetratricopeptide repeat protein 1 OS=Homo sapiens GN=TTC1 PE=1 SV=1	0	0	75	19	432	19	1	292	33.5	4.84	9747	587.81	19	9	0	1.94101e+08	2.04259e+08	2.01614e+08	2.92926e+08	295190216	3.01896e+08	3.03269e+08	2.99249e+08	3.09218e+08
High	High	Master Protein	P08758	Annexin A5 OS=Homo sapiens GN=ANXA5 PE=1 SV=2	0	0	79	26	678	25	1	320	35.9	5.05	17711	587.36	26	10	1	3.01679e+09	3.09746e+09	2.86555e+09	3.56039e+09	3.86298e+09	3.84121e+09	3.14844e+09	3.33638e+09	3.34013e+09
High	High	Master Protein	Q709C8	Vacuolar protein sorting-associated protein 13C OS=Homo sapiens GN=VPS13C PE=1 SV=1	0	0	32	89	586	88	1	3753	422.1	6.83	13257	587.12	87	42	1	2.24292e+08	2.25997e+08	2.1638e+08	2.477e+08	2.52849e+08	2.41084e+08	2.46714e+08	2.56459e+08	2.43579e+08
High	High	Master Protein	Q15046	Lysine--tRNA ligase OS=Homo sapiens GN=KARS PE=1 SV=3	0	0	65	36	642	36	1	597	68	6.35	13057	586.9	34	19	0	1.92369e+09	1.8959e+09	1.82979e+09	2.4443e+09	2.42553e+09	2.39807e+09	2.40257e+09	2.40339e+09	2.32096e+09	Acetyl [N-Term]
High	High	Master Protein	Q99623	Prohibitin-2 OS=Homo sapiens GN=PHB2 PE=1 SV=2	0	0	66	19	618	19	1	299	33.3	9.83	16589	586.44	19	7	0	2.54024e+09	2.45617e+09	2.37757e+09	3.3523e+09	3.37212e+09	3.29947e+09	3.05851e+09	2.90062e+09	2.56837e+09
High	High	Master Protein	O75390	Citrate synthase, mitochondrial OS=Homo sapiens GN=CS PE=1 SV=2	0	0	49	20	548	20	1	466	51.7	8.32	12949	586.28	20	8	0	1.82976e+09	2.00487e+09	1.89568e+09	2.24296e+09	2.35018e+09	2.20321e+09	2.48274e+09	2.28171e+09	2.27778e+09
High	High	Master Protein	Q9UN86	Ras GTPase-activating protein-binding protein 2 OS=Homo sapiens GN=G3BP2 PE=1 SV=2	0	0	48	21	452	19	1	482	54.1	5.55	8633	584.69	21	11	0	7.58268e+08	8.61798e+08	7.23968e+08	8.1318e+08	7.97863e+08	7.8659e+08	7.80197e+08	7.3161e+08	7.05038e+08
High	High	Master Protein	P62081	40S ribosomal protein S7 OS=Homo sapiens GN=RPS7 PE=1 SV=1	0	0	66	15	472	15	1	194	22.1	10.1	9175	584.6	15	4	0	1.93953e+09	2.11627e+09	1.95166e+09	2.47606e+09	2.85416e+09	2.75386e+09	2.39744e+09	2.46062e+09	2.23752e+09
High	High	Master Protein	Q13838	Spliceosome RNA helicase DDX39B OS=Homo sapiens GN=DDX39B PE=1 SV=1	0	0	62	28	854	12	1	428	49	5.67	21995	584.58	28	10	0	1.03027e+09	9.8893e+08	9.04751e+08	1.25391e+09	1.31098e+09	1.2811e+09	1.29061e+09	1.31249e+09	1.19628e+09	Acetyl [N-Term]
High	High	Master Protein	Q9H2P0	Activity-dependent neuroprotector homeobox protein OS=Homo sapiens GN=ADNP PE=1 SV=1	0	0	62	56	622	56	1	1102	123.5	7.34	13967	584.46	56	27	0	4.90207e+08	4.91488e+08	4.87362e+08	5.88662e+08	5.59123e+08	5.63301e+08	5.07931e+08	4.95078e+08	4.99607e+08	Acetyl [N-Term]
High	High	Master Protein	O14818	Proteasome subunit alpha type-7 OS=Homo sapiens GN=PSMA7 PE=1 SV=1	0	0	74	19	488	19	1	248	27.9	8.46	11530	584.35	19	9	0	1.30318e+09	1.34287e+09	1.27485e+09	1.71319e+09	1.87188e+09	1.69962e+09	1.77061e+09	1.67319e+09	1.68003e+09
High	High	Master Protein	Q6YN16	Hydroxysteroid dehydrogenase-like protein 2 OS=Homo sapiens GN=HSDL2 PE=1 SV=1	0	0	72	27	424	27	1	418	45.4	7.99	8881	584.33	26	19	0	3.01274e+08	3.17119e+08	3.03053e+08	3.60819e+08	3.55846e+08	3.55432e+08	3.58072e+08	3.36073e+08	3.56754e+08
High	High	Master Protein	P42025	Beta-centractin OS=Homo sapiens GN=ACTR1B PE=1 SV=1	0	0	69	23	456	11	1	376	42.3	6.4	8951	583.73	22	9	0	7.6198e+07	67602442	5.38647e+07	1.04213e+08	9.55013e+07	9.41964e+07	7.68026e+07	8.33181e+07	7.81071e+07	Acetyl [N-Term]
High	High	Master Protein	Q14938	Nuclear factor 1 X-type OS=Homo sapiens GN=NFIX PE=1 SV=2	0	0	65	21	378	18	1	502	55.1	8.68	9126	582.43	20	16	1	2.87119e+08	3.34874e+08	2.96636e+08	3.819e+08	3.68834e+08	3.50422e+08	3.30714e+08	3.13711e+08	3.33477e+08	Acetyl [N-Term]
High	High	Master Protein	Q96K17	Transcription factor BTF3 homolog 4 OS=Homo sapiens GN=BTF3L4 PE=1 SV=1	0	0	66	10	334	10	1	158	17.3	6.35	6083	581.18	9	9	0	4.94758e+08	5.23653e+08	5.20031e+08	6.83134e+08	6.83327e+08	7.11258e+08	5.89989e+08	6.10239e+08	5.96805e+08
High	High	Master Protein	P13861	cAMP-dependent protein kinase type II-alpha regulatory subunit OS=Homo sapiens GN=PRKAR2A PE=1 SV=2	0	0	60	22	468	19	1	404	45.5	5.07	11219	580.78	21	17	4	6.40664e+08	6.12429e+08	5.61009e+08	611968886	6.2284e+08	604785370	7.38175e+08	7.22375e+08	6.99978e+08
High	High	Master Protein	Q7Z460	CLIP-associating protein 1 OS=Homo sapiens GN=CLASP1 PE=1 SV=1	0	0	45	56	557	50	1	1538	169.3	9.03	14338	580.59	55	31	6	2.45912e+08	2.58661e+08	2.36658e+08	3.19659e+08	3.2995e+08	3.29384e+08	2.13895e+08	2.17494e+08	2.01404e+08
High	High	Master Protein	Q9BSJ8	Extended synaptotagmin-1 OS=Homo sapiens GN=ESYT1 PE=1 SV=1	0	0	48	37	450	37	1	1104	122.8	5.83	10027	580.41	37	22	0	3.92868e+08	4.45614e+08	4.04238e+08	5.62354e+08	5.97831e+08	5.80125e+08	4.38005e+08	4.33493e+08	4.42788e+08
High	High	Master Protein	Q4V328	GRIP1-associated protein 1 OS=Homo sapiens GN=GRIPAP1 PE=1 SV=1	0	0	66	46	491	46	1	841	95.9	5.11	11210	579.95	45	24	0	2.39647e+08	2.54715e+08	2.39805e+08	3.44087e+08	3.61351e+08	3.47535e+08	3.4451e+08	3.27931e+08	3.49145e+08	Acetyl [N-Term]
High	High	Master Protein	Q02880	DNA topoisomerase 2-beta OS=Homo sapiens GN=TOP2B PE=1 SV=3	0	0	39	62	576	47	1	1626	183.2	8	12369	579.39	61	28	17	3.80667e+08	4.09896e+08	3.6903e+08	4.9166e+08	5.22887e+08	5.30207e+08	3.40494e+08	3.29271e+08	3.35941e+08
High	High	Master Protein	Q9BXJ9	N-alpha-acetyltransferase 15, NatA auxiliary subunit OS=Homo sapiens GN=NAA15 PE=1 SV=1	0	0	56	50	691	41	1	866	101.2	7.42	15845	579.02	48	19	12	1.02721e+09	1.04376e+09	9.64546e+08	1.28136e+09	1.25798e+09	1.29397e+09	1.29205e+09	1.25597e+09	1.23673e+09
High	High	Master Protein	Q16222	UDP-N-acetylhexosamine pyrophosphorylase OS=Homo sapiens GN=UAP1 PE=1 SV=3	0	0	64	26	525	24	1	522	58.7	6.33	11624	578.8	26	12	2	9.45101e+08	9.06398e+08	9.07807e+08	9.2099e+08	9.05479e+08	9.26915e+08	9.8605e+08	9.25844e+08	9.16447e+08
High	High	Master Protein	O75821	Eukaryotic translation initiation factor 3 subunit G OS=Homo sapiens GN=EIF3G PE=1 SV=2	0	0	72	24	595	24	1	320	35.6	6.13	14711	578.3	24	11	0	9.84393e+08	1.07611e+09	9.87867e+08	1.25024e+09	1.25983e+09	1.27068e+09	1.04236e+09	1.09983e+09	1073675193	Acetyl [N-Term]
High	High	Master Protein	Q9UNS2	COP9 signalosome complex subunit 3 OS=Homo sapiens GN=COPS3 PE=1 SV=3	0	0	60	20	453	20	1	423	47.8	6.65	10718	577.44	20	11	0	6.39496e+08	6.2382e+08	5.90162e+08	7.62758e+08	7.85066e+08	7.66271e+08	7.21979e+08	7.17223e+08	6.40186e+08	Acetyl [N-Term]
High	High	Master Protein	Q14258	E3 ubiquitin/ISG15 ligase TRIM25 OS=Homo sapiens GN=TRIM25 PE=1 SV=2	0	0	62	38	612	38	1	630	70.9	8.09	15116	577.41	38	25	0	1.02843e+09	1.01967e+09	9.81094e+08	1.15242e+09	1228049973	1.18978e+09	1.21663e+09	1.21044e+09	1.11569e+09
High	High	Master Protein	P29144	Tripeptidyl-peptidase 2 OS=Homo sapiens GN=TPP2 PE=1 SV=4	0	0	57	55	564	55	1	1249	138.3	6.32	13193	577.16	54	27	0	5.43552e+08	5.53194e+08	5.20948e+08	6.29423e+08	6.46504e+08	6.24272e+08	6.75578e+08	6.46394e+08	6.24528e+08	Acetyl [N-Term]
High	High	Master Protein	P34913	Bifunctional epoxide hydrolase 2 OS=Homo sapiens GN=EPHX2 PE=1 SV=2	0	0	61	26	387	26	1	555	62.6	6.28	7987	576.83	25	19	0	1.88832e+08	1.84823e+08	1.69042e+08	2.65188e+08	2.58474e+08	2.51012e+08	2.61559e+08	2.46114e+08	2.48237e+08
High	High	Master Protein	Q5JRX3	Presequence protease, mitochondrial OS=Homo sapiens GN=PITRM1 PE=1 SV=3	0	0	57	49	568	49	1	1037	117.3	6.92	12753	576.09	49	22	0	5.27629e+08	5.20598e+08	5.09011e+08	6.94182e+08	7.07395e+08	6.9066e+08	705796042	6.89543e+08	6.74221e+08
High	High	Master Protein	P58546	Myotrophin OS=Homo sapiens GN=MTPN PE=1 SV=2	0	0	74	7	308	7	1	118	12.9	5.52	6061	575.42	7	4	0	7.56839e+08	7.32265e+08	7.28356e+08	8.73773e+08	9.50534e+08	8.73766e+08	1.08306e+09	1.05583e+09	1.02665e+09
High	High	Master Protein	Q9UNF1	Melanoma-associated antigen D2 OS=Homo sapiens GN=MAGED2 PE=1 SV=2	0	0	58	34	485	33	1	606	64.9	9.32	12555	575.08	32	17	1	3.40435e+08	3.37333e+08	3.41432e+08	4.31967e+08	4.2623e+08	4.09867e+08	3.93735e+08	3.84265e+08	4.07857e+08	Acetyl [N-Term]
High	High	Master Protein	Q92841	Probable ATP-dependent RNA helicase DDX17 OS=Homo sapiens GN=DDX17 PE=1 SV=2	0	0	64	41	697	32	1	729	80.2	8.27	17897	574.79	41	22	0	1.67601e+09	1.62494e+09	1.53205e+09	2.01902e+09	1.99633e+09	1.94314e+09	1.68116e+09	1.74892e+09	1.62338e+09
High	High	Master Protein	Q9UKX7	Nuclear pore complex protein Nup50 OS=Homo sapiens GN=NUP50 PE=1 SV=2	0	0	78	33	478	33	1	468	50.1	7.06	12629	574.24	33	23	0	3.07441e+08	2.98647e+08	2.84962e+08	3.49749e+08	3.57299e+08	3.4191e+08	2.96764e+08	2.92121e+08	3.20889e+08
High	High	Master Protein	Q9Y3I0	tRNA-splicing ligase RtcB homolog OS=Homo sapiens GN=RTCB PE=1 SV=1	0	0	62	27	589	27	1	505	55.2	7.23	13632	574.1	27	14	0	1.29847e+09	1.35593e+09	1.30981e+09	1.72589e+09	1.72556e+09	1.71745e+09	1.51735e+09	1.54119e+09	1.4779e+09
High	High	Master Protein	O60684	Importin subunit alpha-7 OS=Homo sapiens GN=KPNA6 PE=1 SV=1	0	0	41	22	403	9	1	536	60	4.98	9099	573.4	22	12	13	5.1999e+08	5.77429e+08	5.31524e+08	5.94131e+08	5.99236e+08	6.10575e+08	7.42928e+08	6.78478e+08	6.40097e+08	Acetyl [N-Term]
High	High	Master Protein	A1L0T0	Acetolactate synthase-like protein OS=Homo sapiens GN=ILVBL PE=1 SV=2	0	0	44	19	315	19	1	632	67.8	8.15	6243	573.28	19	13	0	1.41317e+08	1.4134e+08	1.36455e+08	1.72168e+08	1.76536e+08	1.67315e+08	1.50669e+08	1.58223e+08	1.34848e+08
High	High	Master Protein	P62820	Ras-related protein Rab-1A OS=Homo sapiens GN=RAB1A PE=1 SV=3	0	0	78	18	502	10	1	205	22.7	6.21	12372	573.17	17	9	0	2.24062e+08	2.26238e+08	2.4387e+08	2.37867e+08	2.71708e+08	2.71446e+08	2.64945e+08	2.89109e+08	2.78037e+08	Acetyl [N-Term]
High	High	Master Protein	Q8TEQ6	Gem-associated protein 5 OS=Homo sapiens GN=GEMIN5 PE=1 SV=3	0	0	47	55	523	55	1	1508	168.5	6.62	10989	572.69	55	25	0	2.70499e+08	2.77583e+08	2.63462e+08	3.29938e+08	3.33215e+08	3.20429e+08	3.06765e+08	3.07667e+08	3.15448e+08
High	High	Master Protein	Q04726	Transducin-like enhancer protein 3 OS=Homo sapiens GN=TLE3 PE=1 SV=2	0	0	49	28	421	21	1	772	83.4	7.2	10391	572.44	28	18	7	2.90328e+08	2.86045e+08	2.73172e+08	2.99878e+08	3.1699e+08	3.12374e+08	2.85897e+08	2.85504e+08	2.83059e+08
High	High	Master Protein	P62701	40S ribosomal protein S4, X isoform OS=Homo sapiens GN=RPS4X PE=1 SV=2	0	0	62	20	558	10	1	263	29.6	10.15	13987	572.25	20	8	11	2.78369e+09	2.84462e+09	2.87115e+09	3.6303e+09	3.87645e+09	3.84632e+09	3.3866e+09	3.33017e+09	3.21942e+09
High	High	Master Protein	Q9NSE4	Isoleucine--tRNA ligase, mitochondrial OS=Homo sapiens GN=IARS2 PE=1 SV=2	0	0	46	37	504	37	1	1012	113.7	7.2	11448	571.51	37	23	0	4.52208e+08	4.54793e+08	4.36226e+08	5.97084e+08	5.90542e+08	5.68302e+08	5.63656e+08	5.56525e+08	5.42603e+08
High	High	Master Protein	P49591	Serine--tRNA ligase, cytoplasmic OS=Homo sapiens GN=SARS PE=1 SV=3	0	0	61	33	493	33	1	514	58.7	6.43	12239	570.85	32	15	0	1.06511e+09	1.20612e+09	1.11e+09	1.72797e+09	1.76237e+09	1.75038e+09	1.57179e+09	1.4989e+09	1.55604e+09
High	High	Master Protein	P28838	Cytosol aminopeptidase OS=Homo sapiens GN=LAP3 PE=1 SV=3	0	0	66	31	505	31	1	519	56.1	7.93	12317	570.29	31	17	0	5.35942e+08	5.23836e+08	5.20427e+08	6.56421e+08	6.94552e+08	7.11601e+08	5.65869e+08	5.69888e+08	5.67717e+08
High	High	Master Protein	Q13409	Cytoplasmic dynein 1 intermediate chain 2 OS=Homo sapiens GN=DYNC1I2 PE=1 SV=3	0	0	53	24	505	24	1	638	71.4	5.2	12867	569.29	24	16	0	3.81785e+08	3.973e+08	3.8493e+08	4.57745e+08	4.53261e+08	4.43467e+08	4.54421e+08	466134915	4.35629e+08
High	High	Master Protein	P06493	Cyclin-dependent kinase 1 OS=Homo sapiens GN=CDK1 PE=1 SV=3	0	0	72	22	455	20	1	297	34.1	8.4	9157	568.91	22	16	1	8.54554e+08	8.94153e+08	8.42511e+08	1.07059e+09	1.09349e+09	1.13356e+09	7.18156e+08	6.94266e+08	6.89832e+08
High	High	Master Protein	O95433	Activator of 90 kDa heat shock protein ATPase homolog 1 OS=Homo sapiens GN=AHSA1 PE=1 SV=1	0	0	80	24	528	24	1	338	38.3	5.53	11032	568.29	24	13	0	1.54069e+09	1.45596e+09	1.52511e+09	1.75272e+09	1.81201e+09	1.81306e+09	1.68038e+09	1.77829e+09	1.63306e+09
High	High	Master Protein	P16152	Carbonyl reductase [NADPH] 1 OS=Homo sapiens GN=CBR1 PE=1 SV=3	0	0	81	19	463	16	1	277	30.4	8.32	11443	568.01	19	11	3	9.11197e+08	9.24283e+08	8.44229e+08	1.17357e+09	1.28252e+09	1.23988e+09	8.83653e+08	9.02969e+08	9.07439e+08	Acetyl [N-Term]
High	High	Master Protein	Q9NVA2	Septin-11 OS=Homo sapiens GN=SEPT11 PE=1 SV=3	0	0	60	26	545	14	1	429	49.4	6.81	11315	567.81	26	11	16	1.0774e+09	1.16873e+09	1.06079e+09	1.4198e+09	1.41486e+09	1.42227e+09	1.28774e+09	1.25117e+09	1.16796e+09	Acetyl [N-Term]
High	High	Master Protein	Q9Y4E1	WASH complex subunit 2C OS=Homo sapiens GN=WASHC2C PE=1 SV=3	0	0	47	42	424	11	1	1318	144.6	4.79	10404	567.75	40	29	0	8.39432e+06	8.22889e+06	8.29965e+06	1.14433e+07	1.2918e+07	12592283	1.18802e+07	1.16121e+07	1.18556e+07
High	High	Master Protein	Q8N9T8	Protein KRI1 homolog OS=Homo sapiens GN=KRI1 PE=1 SV=3	0	0	40	24	376	24	1	703	82.5	5.14	8265	566.2	24	14	0	2.25284e+08	2.19535e+08	2.0845e+08	2.57717e+08	2.36073e+08	2.52049e+08	2.55257e+08	2.33684e+08	2.60053e+08
High	High	Master Protein	P98175	RNA-binding protein 10 OS=Homo sapiens GN=RBM10 PE=1 SV=3	0	0	48	40	536	36	1	930	103.5	5.97	12563	565.86	40	18	4	4.1133e+08	4.04164e+08	3.90917e+08	5.12206e+08	5.25558e+08	5.53491e+08	454745123	4.62592e+08	4.55104e+08
High	High	Master Protein	P49755	Transmembrane emp24 domain-containing protein 10 OS=Homo sapiens GN=TMED10 PE=1 SV=2	0	0	42	12	368	11	1	219	25	7.44	9684	565.08	12	5	0	7.11793e+08	6.97573e+08	6.35219e+08	8.22216e+08	8.34076e+08	8.11874e+08	7.74272e+08	7.33798e+08	726919283
High	High	Master Protein	Q6PJT7	Zinc finger CCCH domain-containing protein 14 OS=Homo sapiens GN=ZC3H14 PE=1 SV=1	0	0	72	43	548	43	1	736	82.8	7.31	13454	564.63	41	20	0	233428337	2.28075e+08	2.18941e+08	2.98708e+08	3.09106e+08	3.26411e+08	2.5677e+08	2.58605e+08	2.5028e+08	Acetyl [N-Term]
High	High	Master Protein	Q9NXV6	CDKN2A-interacting protein OS=Homo sapiens GN=CDKN2AIP PE=1 SV=3	0	0	60	29	486	29	1	580	61.1	9.01	17071	563.88	29	16	0	1.93973e+08	1.93644e+08	1.9957e+08	2.48705e+08	2.61518e+08	2.61361e+08	2.36067e+08	2.32934e+08	2.39552e+08	Acetyl [N-Term]
High	High	Master Protein	P38919	Eukaryotic initiation factor 4A-III OS=Homo sapiens GN=EIF4A3 PE=1 SV=4	0	0	57	26	611	21	1	411	46.8	6.73	14772	563.32	26	12	0	1.39964e+09	1.39784e+09	1.2737e+09	1.63873e+09	1.5791e+09	1.58396e+09	1278012231	1.33436e+09	1.32336e+09	Acetyl [N-Term]
High	High	Master Protein	Q9UKY7	Protein CDV3 homolog OS=Homo sapiens GN=CDV3 PE=1 SV=1	0	0	70	13	385	13	1	258	27.3	6.4	12689	563.31	13	7	0	4.50421e+08	4.45954e+08	4.49519e+08	5.3925e+08	5.44751e+08	5.78557e+08	6.3459e+08	6.63243e+08	6.63432e+08
High	High	Master Protein	P12109	Collagen alpha-1(VI) chain OS=Homo sapiens GN=COL6A1 PE=1 SV=3	0	0	51	36	432	36	1	1028	108.5	5.43	10599	563.03	36	22	0	1.25179e+08	1.20307e+08	1.22826e+08	1.7858e+08	1.8256e+08	1.79153e+08	2.17898e+08	2.24822e+08	2.29691e+08
High	High	Master Protein	O94874	E3 UFM1-protein ligase 1 OS=Homo sapiens GN=UFL1 PE=1 SV=2	0	0	53	43	620	43	1	794	89.5	6.79	14551	562.38	41	19	0	9.0063e+08	8.78343e+08	8.11618e+08	1.18493e+09	1.22378e+09	1.19233e+09	1.0877e+09	1.06845e+09	1.01736e+09	Acetyl [N-Term]
High	High	Master Protein	Q13617	Cullin-2 OS=Homo sapiens GN=CUL2 PE=1 SV=2	0	0	61	39	566	39	1	745	86.9	6.92	12333	561.85	39	19	0	4.93617e+08	4.88523e+08	5.11936e+08	6.28043e+08	6.51224e+08	6.83747e+08	6.15322e+08	6.56421e+08	6.36364e+08
High	High	Master Protein	Q96T23	Remodeling and spacing factor 1 OS=Homo sapiens GN=RSF1 PE=1 SV=2	0	0	38	46	461	46	1	1441	163.7	5.01	10787	561.45	45	26	0	1.60059e+08	160664489	1.67088e+08	2.1242e+08	2.05222e+08	2.07303e+08	2.03878e+08	1.93845e+08	2.07913e+08
High	High	Master Protein	P26583	High mobility group protein B2 OS=Homo sapiens GN=HMGB2 PE=1 SV=2	0	0	51	16	502	13	1	209	24	7.81	11497	560.79	16	11	0	1.30993e+09	1.34318e+09	1.37315e+09	1.7722e+09	1.8942e+09	1.8421e+09	1.63021e+09	1.63236e+09	1.58025e+09	Acetyl [N-Term]
High	High	Master Protein	P62136	Serine/threonine-protein phosphatase PP1-alpha catalytic subunit OS=Homo sapiens GN=PPP1CA PE=1 SV=1	0	0	72	22	521	5	1	330	37.5	6.33	11349	560.5	22	9	5	2.83765e+08	3.06029e+08	2.9578e+08	3.45223e+08	3.76716e+08	3.75589e+08	3.18882e+08	3.10381e+08	3.34733e+08
High	High	Master Protein	P36873	Serine/threonine-protein phosphatase PP1-gamma catalytic subunit OS=Homo sapiens GN=PPP1CC PE=1 SV=1	0	0	65	19	470	3	1	323	37	6.54	10138	560.5	19	9	0	1.6108e+08	176044193	165212092	163261197	1.64417e+08	1.6015e+08	1.60135e+08	1.73871e+08	1.50979e+08
High	High	Master Protein	Q14966	Zinc finger protein 638 OS=Homo sapiens GN=ZNF638 PE=1 SV=2	0	0	34	59	489	59	1	1978	220.5	6.38	10932	560.32	57	24	0	1.8069e+08	1.81003e+08	1.72206e+08	2.33751e+08	2.4081e+08	2.43725e+08	1.7384e+08	1.77833e+08	1.67295e+08
High	High	Master Protein	P25787	Proteasome subunit alpha type-2 OS=Homo sapiens GN=PSMA2 PE=1 SV=2	0	0	70	12	362	12	1	234	25.9	7.43	7891	560.28	12	10	0	7.46367e+08	6.88791e+08	7.23242e+08	8.10797e+08	8.82833e+08	8.97351e+08	7.79127e+08	7.88042e+08	7.944e+08
High	High	Master Protein	Q92973	Transportin-1 OS=Homo sapiens GN=TNPO1 PE=1 SV=2	0	0	55	40	575	30	1	898	102.3	4.98	13214	560.26	40	19	11	1.17186e+09	1.24952e+09	1.15585e+09	1.35207e+09	1.45031e+09	1.3241e+09	1.17502e+09	1.20522e+09	1.18016e+09
High	High	Master Protein	Q9Y2T7	Y-box-binding protein 2 OS=Homo sapiens GN=YBX2 PE=1 SV=2	0	0	24	6	360	2	1	364	38.5	10.8	11224	559.31	4	5	0
High	High	Master Protein	Q9UBU9	Nuclear RNA export factor 1 OS=Homo sapiens GN=NXF1 PE=1 SV=1	0	0	59	31	464	31	1	619	70.1	8.51	12024	559.26	31	14	0	2.9878e+08	2.76552e+08	2.67706e+08	3.5844e+08	3.35229e+08	3.31908e+08	2.89855e+08	3.09804e+08	2.86888e+08
High	High	Master Protein	Q9UNZ2	NSFL1 cofactor p47 OS=Homo sapiens GN=NSFL1C PE=1 SV=2	0	0	75	28	449	28	1	370	40.5	5.1	11568	559.05	27	16	0	576190525	5.74002e+08	5.66527e+08	7.59292e+08	7.46691e+08	7.55944e+08	7.88962e+08	8.0934e+08	7.5855e+08
High	High	Master Protein	Q9HAV4	Exportin-5 OS=Homo sapiens GN=XPO5 PE=1 SV=1	0	0	48	46	533	46	1	1204	136.2	5.8	11531	557.13	46	27	0	5.00467e+08	5.03158e+08	4.83343e+08	6.26028e+08	6.5243e+08	6.20084e+08	5.32921e+08	5.42103e+08	5.24114e+08	Acetyl [N-Term]
High	High	Master Protein	O75122	CLIP-associating protein 2 OS=Homo sapiens GN=CLASP2 PE=1 SV=2	0	0	55	54	526	48	1	1294	141	8.47	12841	555.59	52	28	0	1.99939e+08	2.02992e+08	1.95224e+08	2.54558e+08	2.47862e+08	2.5343e+08	2.39104e+08	2.2585e+08	2.30534e+08
High	High	Master Protein	P39748	Flap endonuclease 1 OS=Homo sapiens GN=FEN1 PE=1 SV=1	0	0	52	16	407	16	1	380	42.6	8.62	9902	554.72	16	9	0	8.77664e+08	8.54248e+08	9.0361e+08	8.40342e+08	9.2787e+08	8.79638e+08	6.354e+08	6.31206e+08	6.31022e+08
High	High	Master Protein	Q9H1B7	Interferon regulatory factor 2-binding protein-like OS=Homo sapiens GN=IRF2BPL PE=1 SV=1	0	0	51	35	471	32	1	796	82.6	8.24	11279	554.18	34	19	3	2.7568e+08	2.75917e+08	2.58962e+08	3.12443e+08	3.15711e+08	3.09646e+08	2.71356e+08	2.69592e+08	2.64877e+08	Acetyl [N-Term]
High	High	Master Protein	P30154	Serine/threonine-protein phosphatase 2A 65 kDa regulatory subunit A beta isoform OS=Homo sapiens GN=PPP2R1B PE=1 SV=3	0	0	49	26	518	18	1	601	66.2	4.94	14078	554	26	14	0	1.72539e+08	1.6697e+08	1.53669e+08	1.68112e+08	1.63734e+08	1.59042e+08	1.35688e+08	1.3171e+08	1.29744e+08
High	High	Master Protein	O60341	Lysine-specific histone demethylase 1A OS=Homo sapiens GN=KDM1A PE=1 SV=2	0	0	66	37	461	37	1	852	92.8	6.52	10918	552.15	37	19	0	4.10035e+08	4.23857e+08	4.32454e+08	4.22739e+08	4.20034e+08	4.32233e+08	4.03573e+08	3.92752e+08	3.95023e+08
High	High	Master Protein	Q9BW04	Specifically androgen-regulated gene protein OS=Homo sapiens GN=SARG PE=1 SV=2	0	0	68	32	485	32	1	601	63.9	8.62	12510	552.01	32	17	0	7.58604e+08	7.48859e+08	7.29592e+08	1.01117e+09	1.01845e+09	1.02625e+09	6.29824e+08	6.75884e+08	6.45097e+08
High	High	Master Protein	P84085	ADP-ribosylation factor 5 OS=Homo sapiens GN=ARF5 PE=1 SV=2	0	0	70	13	570	6	1	180	20.5	6.79	13203	551.9	13	8	0	2.81076e+08	3.13606e+08	3.00881e+08	3.19636e+08	3.59003e+08	3.91042e+08	3.49271e+08	3.5045e+08	3.61644e+08
High	High	Master Protein	O75955	Flotillin-1 OS=Homo sapiens GN=FLOT1 PE=1 SV=3	0	0	75	29	428	29	1	427	47.3	7.49	10143	551.85	29	20	0	2.51413e+08	2.72299e+08	2.64428e+08	3.63731e+08	3.62066e+08	3.47737e+08	2.90717e+08	3.04183e+08	2.81444e+08
High	High	Master Protein	O43264	Centromere/kinetochore protein zw10 homolog OS=Homo sapiens GN=ZW10 PE=1 SV=3	0	0	56	36	473	36	1	779	88.8	6.27	11849	550.81	36	21	0	4.16483e+08	5.09009e+08	4.79221e+08	5.33414e+08	6.12302e+08	6.02494e+08	4.72372e+08	501765281	4.83326e+08	Acetyl [N-Term]
High	High	Master Protein	P30048	Thioredoxin-dependent peroxide reductase, mitochondrial OS=Homo sapiens GN=PRDX3 PE=1 SV=3	0	0	55	10	378	10	1	256	27.7	7.78	8828	550.66	10	6	0	1.54717e+09	1.4391e+09	1.41107e+09	1653810460	1.65988e+09	1.61192e+09	1.50396e+09	1.45401e+09	1.53109e+09
High	High	Master Protein	Q9Y5L0	Transportin-3 OS=Homo sapiens GN=TNPO3 PE=1 SV=3	0	0	39	29	417	29	1	923	104.1	5.57	9415	550.49	28	19	0	2.31375e+08	2.28759e+08	2.35779e+08	2.49374e+08	2.66287e+08	2.53904e+08	2.45063e+08	2.60653e+08	2.42948e+08	Acetyl [N-Term]
High	High	Master Protein	O00148	ATP-dependent RNA helicase DDX39A OS=Homo sapiens GN=DDX39A PE=1 SV=2	0	0	62	28	779	12	1	427	49.1	5.68	16640	550.46	28	8	18	2.9664e+09	2.72518e+09	2.63389e+09	3.1638e+09	3.28255e+09	3.26321e+09	3.09441e+09	3.14032e+09	3.02218e+09	Acetyl [N-Term]
High	High	Master Protein	Q9UHB6	LIM domain and actin-binding protein 1 OS=Homo sapiens GN=LIMA1 PE=1 SV=1	0	0	59	40	556	40	1	759	85.2	6.84	14050	550.25	39	24	0	3.97584e+08	4.1891e+08	3.96582e+08	5.56678e+08	5.63494e+08	5.47925e+08	5.73403e+08	5.56806e+08	5.8233e+08	Acetyl [N-Term]
High	High	Master Protein	Q02252	Methylmalonate-semialdehyde dehydrogenase [acylating], mitochondrial OS=Homo sapiens GN=ALDH6A1 PE=1 SV=2	0	0	66	31	538	31	1	535	57.8	8.5	12384	549.3	31	18	0	7.5112e+08	7.56526e+08	6.88615e+08	9.87387e+08	1.06649e+09	1.02367e+09	8.97465e+08	9.33277e+08	8.73822e+08
High	High	Master Protein	Q14690	Protein RRP5 homolog OS=Homo sapiens GN=PDCD11 PE=1 SV=3	0	0	43	70	616	70	1	1871	208.6	8.87	14528	548.84	69	26	0	3.75962e+08	3.85868e+08	3.71014e+08	4.48339e+08	4.66324e+08	4.62943e+08	4.62033e+08	4.74806e+08	4.74532e+08
High	High	Master Protein	Q9BPX3	Condensin complex subunit 3 OS=Homo sapiens GN=NCAPG PE=1 SV=1	0	0	45	39	474	39	1	1015	114.3	5.59	11739	548.62	39	20	0	3.64828e+08	3.95627e+08	3.57904e+08	3.9257e+08	3.97766e+08	3.94253e+08	3.08398e+08	3.06289e+08	2.9332e+08
High	High	Master Protein	P12081	Histidine--tRNA ligase, cytoplasmic OS=Homo sapiens GN=HARS PE=1 SV=2	0	0	67	30	454	23	1	509	57.4	5.88	9728	548.6	30	12	7	1.28276e+09	1.28203e+09	1.28328e+09	1.56988e+09	1.67181e+09	1.63342e+09	1.56905e+09	1.65747e+09	1.56667e+09
High	High	Master Protein	P05091	Aldehyde dehydrogenase, mitochondrial OS=Homo sapiens GN=ALDH2 PE=1 SV=2	0	0	62	27	452	24	1	517	56.3	7.05	10311	548.27	27	17	3	5.20458e+08	4.8255e+08	4.70798e+08	6.50665e+08	6.82853e+08	7.0777e+08	6.93851e+08	6.78155e+08	6.62618e+08
High	High	Master Protein	Q7Z3K3	Pogo transposable element with ZNF domain OS=Homo sapiens GN=POGZ PE=1 SV=2	0	0	42	40	432	40	1	1410	155.2	7.4	9862	548.16	40	20	0	1.4163e+08	1.48668e+08	1.4033e+08	1.64917e+08	1.79445e+08	1.76071e+08	1.68217e+08	1.67647e+08	1.639e+08	Acetyl [N-Term]
High	High	Master Protein	P21266	Glutathione S-transferase Mu 3 OS=Homo sapiens GN=GSTM3 PE=1 SV=3	0	0	74	21	589	21	1	225	26.5	5.54	15316	547.29	21	12	0	1.4613e+09	1.49214e+09	1.46504e+09	1.89669e+09	1.99635e+09	1.99658e+09	2.00121e+09	1.96806e+09	2.08226e+09	Acetyl [N-Term]
High	High	Master Protein	P24534	Elongation factor 1-beta OS=Homo sapiens GN=EEF1B2 PE=1 SV=3	0	0	71	16	426	13	1	225	24.7	4.67	9540	546.11	16	9	0	2.08175e+09	2.06453e+09	2.06994e+09	2.99494e+09	2.82144e+09	2.77304e+09	2.85951e+09	2.9124e+09	2.55688e+09
High	High	Master Protein	Q9BWF3	RNA-binding protein 4 OS=Homo sapiens GN=RBM4 PE=1 SV=1	0	0	71	22	398	7	1	364	40.3	7.08	10426	546.08	22	7	16	5.76501e+08	6.08507e+08	5.47692e+08	6.96826e+08	7.19594e+08	7.2895e+08	6.42173e+08	597485569	6.03079e+08
High	High	Master Protein	O43660	Pleiotropic regulator 1 OS=Homo sapiens GN=PLRG1 PE=1 SV=1	0	0	68	30	419	30	1	514	57.2	9.17	9152	545.64	30	11	0	2.91635e+08	2.83173e+08	2.81176e+08	3.62074e+08	3.65813e+08	3.61104e+08	3.02332e+08	3.26068e+08	2.85166e+08
High	High	Master Protein	Q8WYP5	Protein ELYS OS=Homo sapiens GN=AHCTF1 PE=1 SV=3	0	0	32	56	459	56	1	2266	252.3	6.6	10538	545.59	54	35	0	1.16869e+08	1.2541e+08	1.21651e+08	1.42961e+08	1.49823e+08	1.54045e+08	1.26379e+08	1.21792e+08	1.22578e+08
High	High	Master Protein	Q15435	Protein phosphatase 1 regulatory subunit 7 OS=Homo sapiens GN=PPP1R7 PE=1 SV=1	0	0	63	23	402	23	1	360	41.5	4.91	10486	545.5	23	11	0	3.59655e+08	3.76396e+08	3.46434e+08	4.84326e+08	4.78577e+08	4.73945e+08	4.51995e+08	4.5666e+08	429892723
High	High	Master Protein	Q06323	Proteasome activator complex subunit 1 OS=Homo sapiens GN=PSME1 PE=1 SV=1	0	0	66	17	502	17	1	249	28.7	6.02	11878	543.86	17	11	0	1.35075e+09	1.22726e+09	1.2951e+09	1.48792e+09	1.6656e+09	1.58821e+09	1.42277e+09	1.47718e+09	1.34381e+09
High	High	Master Protein	Q9UJZ1	Stomatin-like protein 2, mitochondrial OS=Homo sapiens GN=STOML2 PE=1 SV=1	0	0	56	15	393	15	1	356	38.5	7.39	10376	543.8	15	13	0	3.82332e+08	4.26355e+08	3.80014e+08	5.08213e+08	5.40411e+08	5.40315e+08	4.62036e+08	4.54676e+08	4.23702e+08
High	High	Master Protein	P11766	Alcohol dehydrogenase class-3 OS=Homo sapiens GN=ADH5 PE=1 SV=4	0	0	50	15	391	15	1	374	39.7	7.49	10133	542.59	15	8	0	8.90664e+08	9.17074e+08	8.81727e+08	9.82028e+08	1.04749e+09	9.95153e+08	1.019e+09	9.35029e+08	9.65471e+08
High	High	Master Protein	Q9Y224	UPF0568 protein C14orf166 OS=Homo sapiens GN=C14orf166 PE=1 SV=1	0	0	77	18	429	18	1	244	28.1	6.65	10656	542.26	18	10	0	6.57276e+08	7.46254e+08	7.14858e+08	1.01676e+09	1.04063e+09	9.9743e+08	9.29218e+08	9.1434e+08	8.95739e+08
High	High	Master Protein	Q93052	Lipoma-preferred partner OS=Homo sapiens GN=LPP PE=1 SV=1	0	0	82	34	466	34	1	612	65.7	7.37	9538	542.02	33	22	0	4.2701e+08	4.20074e+08	4.2747e+08	538756574	5.79739e+08	5.81629e+08	5.42872e+08	5.55069e+08	5.10392e+08
High	High	Master Protein	P14550	Alcohol dehydrogenase [NADP(+)] OS=Homo sapiens GN=AKR1A1 PE=1 SV=3	0	0	64	19	520	17	1	325	36.6	6.79	12083	541.97	19	10	3	2.18741e+09	1.98519e+09	2.01465e+09	2.4449e+09	2.59586e+09	2.55754e+09	2.38568e+09	2.48372e+09	2.2695e+09	Acetyl [N-Term]
High	High	Master Protein	P55263	Adenosine kinase OS=Homo sapiens GN=ADK PE=1 SV=2	0	0	78	23	452	23	1	362	40.5	6.7	10168	541.57	23	12	0	7.51989e+08	7.41245e+08	7.29673e+08	9.77024e+08	9.6221e+08	1.03296e+09	8.8837e+08	8.91429e+08	8.3916e+08	Acetyl [N-Term]
High	High	Master Protein	Q9HB71	Calcyclin-binding protein OS=Homo sapiens GN=CACYBP PE=1 SV=2	0	0	71	23	571	23	1	228	26.2	8.25	12594	541.56	23	14	0	2.31293e+09	2.45622e+09	2.25974e+09	2.78318e+09	2.73072e+09	2.78853e+09	2.5352e+09	2.42546e+09	2.31446e+09	Acetyl [N-Term]
High	High	Master Protein	Q92614	Unconventional myosin-XVIIIa OS=Homo sapiens GN=MYO18A PE=1 SV=3	0	0	38	63	463	63	1	2054	233	6.3	10970	541.4	63	27	0	1.27006e+08	1.22104e+08	1.12289e+08	1.46747e+08	1.41792e+08	1.50134e+08	1.52431e+08	1.48849e+08	1.44923e+08
High	High	Master Protein	O14828	Secretory carrier-associated membrane protein 3 OS=Homo sapiens GN=SCAMP3 PE=1 SV=3	0	0	46	15	286	15	1	347	38.3	7.64	8156	541.24	15	9	0	3.45717e+08	3.06414e+08	2.93763e+08	3.99731e+08	4.24465e+08	4.39006e+08	4.29675e+08	3.98117e+08	4.00619e+08
High	High	Master Protein	Q9NYB0	Telomeric repeat-binding factor 2-interacting protein 1 OS=Homo sapiens GN=TERF2IP PE=1 SV=1	0	0	61	25	389	25	1	399	44.2	4.73	9577	540.31	25	17	0	1.75109e+08	1.96721e+08	1.71217e+08	2.36274e+08	2.50378e+08	2.4329e+08	2.15603e+08	2.29052e+08	2.28186e+08
High	High	Master Protein	P40692	DNA mismatch repair protein Mlh1 OS=Homo sapiens GN=MLH1 PE=1 SV=1	0	0	68	46	448	46	1	756	84.5	5.72	9499	540.25	45	22	0	2.85396e+08	2.95058e+08	2.84344e+08	2.99317e+08	3.28235e+08	3.08326e+08	2.45122e+08	2.56776e+08	2.42882e+08	Acetyl [N-Term]
High	High	Master Protein	O43747	AP-1 complex subunit gamma-1 OS=Homo sapiens GN=AP1G1 PE=1 SV=5	0	0	48	35	506	34	1	822	91.3	6.8	13091	540.03	35	14	1	6.28362e+08	6.76618e+08	6.44624e+08	8.69003e+08	8.97915e+08	8.71692e+08	7.13104e+08	7.28526e+08	7.02849e+08
High	High	Master Protein	O43847	Nardilysin OS=Homo sapiens GN=NRDC PE=1 SV=2	0	0	42	45	487	45	1	1150	131.5	5	11246	539.17	44	24	0	3.62575e+08	3.90815e+08	3.76454e+08	4.48485e+08	4.41343e+08	4.35146e+08	4.77293e+08	4.6026e+08	4.80048e+08
High	High	Master Protein	P30040	Endoplasmic reticulum resident protein 29 OS=Homo sapiens GN=ERP29 PE=1 SV=4	0	0	57	12	413	12	1	261	29	7.31	9985	539.04	11	7	0	9.13159e+08	9.37279e+08	8.90909e+08	1.31883e+09	1.40384e+09	1.37455e+09	1.12798e+09	1.06746e+09	1.01248e+09
High	High	Master Protein	P21397	Amine oxidase [flavin-containing] A OS=Homo sapiens GN=MAOA PE=1 SV=1	0	0	51	23	494	23	1	527	59.6	7.85	12437	538.28	22	12	0	1.12229e+09	1.1667e+09	1.14971e+09	1.39121e+09	1.5377e+09	1.46791e+09	1.44914e+09	1.43325e+09	1.37167e+09
High	High	Master Protein	P13645	Keratin, type I cytoskeletal 10 OS=Homo sapiens GN=KRT10 PE=1 SV=6	0	0	54	30	435	27	1	584	58.8	5.21	10378	536.73	30	16	3	4.10583e+08	4.51054e+08	4.5866e+08	5.43278e+08	6.12625e+08	6.1632e+08	7.36274e+08	7.62921e+08	7.23274e+08
High	High	Master Protein	P46782	40S ribosomal protein S5 OS=Homo sapiens GN=RPS5 PE=1 SV=4	0	0	58	14	429	14	1	204	22.9	9.72	11921	536.69	14	5	0	1.62867e+09	1.60265e+09	1.50921e+09	2.47747e+09	2526613368	2.58574e+09	2.33634e+09	2.39731e+09	2.21475e+09	Acetyl [N-Term; N-Term]
High	High	Master Protein	Q9Y446	Plakophilin-3 OS=Homo sapiens GN=PKP3 PE=1 SV=1	0	0	67	44	542	44	1	797	87	9.32	12473	536.56	43	27	0	5.68487e+08	6.10976e+08	6.05822e+08	8.01341e+08	8.071e+08	8.43965e+08	7.18129e+08	7.49543e+08	7.34552e+08	Acetyl [N-Term]
High	High	Master Protein	Q99436	Proteasome subunit beta type-7 OS=Homo sapiens GN=PSMB7 PE=1 SV=1	0	0	52	9	301	9	1	277	29.9	7.68	8273	536.22	9	5	0	5.46131e+08	4.79346e+08	4.80325e+08	6.64578e+08	6.24341e+08	7.04395e+08	6.2379e+08	6.53735e+08	6.39464e+08
High	High	Master Protein	P42224	Signal transducer and activator of transcription 1-alpha/beta OS=Homo sapiens GN=STAT1 PE=1 SV=2	0	0	53	32	425	32	1	750	87.3	6.05	9255	535.93	32	19	0	4.11772e+08	4.11942e+08	4.02625e+08	4.58521e+08	4.63723e+08	4.5863e+08	4.07743e+08	4.41768e+08	3.88431e+08	Acetyl [N-Term]
High	High	Master Protein	Q9NYF8	Bcl-2-associated transcription factor 1 OS=Homo sapiens GN=BCLAF1 PE=1 SV=2	0	0	44	44	633	42	1	920	106.1	9.98	15907	534.79	44	13	2	1.37576e+09	1.38911e+09	1.35012e+09	2.01944e+09	2.11468e+09	2.20196e+09	1.75873e+09	1.76275e+09	1.83179e+09
High	High	Master Protein	Q9H2U1	ATP-dependent RNA helicase DHX36 OS=Homo sapiens GN=DHX36 PE=1 SV=2	0	0	49	44	483	42	1	1008	114.7	7.68	11379	534.69	44	25	2	2.96108e+08	3.25486e+08	3.00828e+08	3.9807e+08	4.14504e+08	3.92012e+08	3.7685e+08	3.74168e+08	3.53429e+08	Acetyl [N-Term]
High	High	Master Protein	Q8TEM1	Nuclear pore membrane glycoprotein 210 OS=Homo sapiens GN=NUP210 PE=1 SV=3	0	0	36	48	500	48	1	1887	205	6.81	11213	534.42	47	23	0	3.62332e+08	3.61128e+08	3.48843e+08	4.5555e+08	4.92377e+08	4.64145e+08	4.06805e+08	4.18855e+08	4.13197e+08
High	High	Master Protein	Q9UKV3	Apoptotic chromatin condensation inducer in the nucleus OS=Homo sapiens GN=ACIN1 PE=1 SV=2	0	0	45	54	690	53	1	1341	151.8	6.43	15666	534.23	54	20	1	5.93027e+08	6.02987e+08	5.55625e+08	7.40322e+08	6.99026e+08	7.16154e+08	6.35191e+08	6.28227e+08	6.42137e+08
High	High	Master Protein	Q9NXG2	THUMP domain-containing protein 1 OS=Homo sapiens GN=THUMPD1 PE=1 SV=2	0	0	79	26	425	26	1	353	39.3	7.88	9543	533.91	26	12	0	5.14539e+08	5.12561e+08	4.6989e+08	6.41844e+08	6.41791e+08	6.55386e+08	6.24167e+08	5.97004e+08	6.14361e+08	Acetyl [N-Term]
High	High	Master Protein	Q8WXH0	Nesprin-2 OS=Homo sapiens GN=SYNE2 PE=1 SV=3	0	0	24	123	577	123	1	6885	795.9	5.36	12636	533.47	118	48	0	1.58711e+08	1.65781e+08	1.59226e+08	1.87682e+08	1.8818e+08	1.91425e+08	1.49245e+08	1.29724e+08	1.34001e+08
High	High	Master Protein	P17844	Probable ATP-dependent RNA helicase DDX5 OS=Homo sapiens GN=DDX5 PE=1 SV=1	0	0	67	46	692	37	1	614	69.1	8.92	14685	528.41	46	16	9	3.64501e+09	3.46078e+09	3.44673e+09	4.18665e+09	4.35392e+09	4.13607e+09	4.40068e+09	4.49804e+09	4.11096e+09	Acetyl [N-Term]
High	High	Master Protein	Q12959	Disks large homolog 1 OS=Homo sapiens GN=DLG1 PE=1 SV=2	0	0	56	34	355	29	1	904	100.4	5.76	7742	528.14	34	18	5	1.6795e+08	1.62126e+08	1.67543e+08	2.0099e+08	2.0335e+08	2.12076e+08	1.67965e+08	1.61474e+08	1.63581e+08
High	High	Master Protein	Q9BTW9	Tubulin-specific chaperone D OS=Homo sapiens GN=TBCD PE=1 SV=2	0	0	52	50	506	50	1	1192	132.5	6.19	11083	527.69	48	24	0	3.4524e+08	3.61136e+08	3.69394e+08	4.03776e+08	4.07092e+08	4.33883e+08	4.12764e+08	4.26045e+08	4.27317e+08
High	High	Master Protein	P33121	Long-chain-fatty-acid--CoA ligase 1 OS=Homo sapiens GN=ACSL1 PE=1 SV=1	0	0	57	34	545	34	1	698	77.9	7.15	12335	527.32	34	18	0	8.2462e+08	8.99948e+08	8.2259e+08	1.20275e+09	1.19149e+09	1.21569e+09	1.09252e+09	1.07687e+09	1.05792e+09	Acetyl [N-Term]
High	High	Master Protein	Q9HCK8	Chromodomain-helicase-DNA-binding protein 8 OS=Homo sapiens GN=CHD8 PE=1 SV=5	0	0	35	61	469	52	1	2581	290.3	6.47	10936	526.96	61	28	8	1.25829e+08	1.31866e+08	1.27623e+08	1.42642e+08	1.53407e+08	1.40984e+08	1.28895e+08	1.3049e+08	1.23801e+08
High	High	Master Protein	P62829	60S ribosomal protein L23 OS=Homo sapiens GN=RPL23 PE=1 SV=1	0	0	69	9	347	9	1	140	14.9	10.51	7416	526.87	9	4	0	1.29457e+09	1.32262e+09	1.11463e+09	1.494e+09	1.50237e+09	1.55097e+09	1.39544e+09	1.53865e+09	1.43943e+09
High	High	Master Protein	Q12792	Twinfilin-1 OS=Homo sapiens GN=TWF1 PE=1 SV=3	0	0	71	23	454	20	1	350	40.3	6.96	10903	526.31	23	11	4	4.82069e+08	5.02837e+08	4.84064e+08	6.42648e+08	6.75622e+08	6.6509e+08	6.44006e+08	6.6689e+08	6.6022e+08	Acetyl [N-Term]
High	High	Master Protein	Q9NYV4	Cyclin-dependent kinase 12 OS=Homo sapiens GN=CDK12 PE=1 SV=2	0	0	33	38	422	33	1	1490	164.1	9.44	9779	526.13	36	21	5	2.95518e+08	2.98267e+08	3.0606e+08	4.87506e+08	4.89127e+08	4.84877e+08	3.606e+08	3.8055e+08	3.60243e+08
High	High	Master Protein	Q15819	Ubiquitin-conjugating enzyme E2 variant 2 OS=Homo sapiens GN=UBE2V2 PE=1 SV=4	0	0	65	9	383	3	1	145	16.4	8.09	9938	526	9	3	0	9.56185e+07	1.02331e+08	1.02718e+08	1.29253e+08	1.40104e+08	148300780	9.68079e+07	1.05161e+08	9.93203e+07
High	High	Master Protein	P51532	Transcription activator BRG1 OS=Homo sapiens GN=SMARCA4 PE=1 SV=2	0	0	33	55	592	34	1	1647	184.5	7.88	14663	525.62	54	26	21	4.25325e+08	4.34149e+08	3.92997e+08	4.92528e+08	5.10718e+08	4.97711e+08	4.03148e+08	4.12107e+08	4.0245e+08
High	High	Master Protein	Q9BZE4	Nucleolar GTP-binding protein 1 OS=Homo sapiens GN=GTPBP4 PE=1 SV=3	0	0	55	40	517	40	1	634	73.9	9.5	11586	525.42	39	16	0	6.81365e+08	7.23877e+08	6.90789e+08	8.25321e+08	8.7234e+08	8.81938e+08	9.4099e+08	9.28883e+08	9.11386e+08
High	High	Master Protein	P11498	Pyruvate carboxylase, mitochondrial OS=Homo sapiens GN=PC PE=1 SV=2	0	0	53	44	495	44	1	1178	129.6	6.84	10844	525.14	44	23	0	3.30474e+08	3.44868e+08	3.11084e+08	4.49658e+08	4.45359e+08	4.40912e+08	4.25645e+08	4.0754e+08	4.29482e+08
High	High	Master Protein	P52294	Importin subunit alpha-5 OS=Homo sapiens GN=KPNA1 PE=1 SV=3	0	0	39	20	342	9	1	538	60.2	5.01	7369	524.72	19	13	0	7.48907e+07	7.05949e+07	6.92606e+07	7.84739e+07	9.11536e+07	8.82033e+07	9.18811e+07	9.13033e+07	9.44595e+07
High	High	Master Protein	Q7Z5L9	Interferon regulatory factor 2-binding protein 2 OS=Homo sapiens GN=IRF2BP2 PE=1 SV=2	0	0	68	23	347	20	1	587	61	8.69	8140	524.41	22	16	0	8.39759e+07	8.71116e+07	8.24229e+07	1.13205e+08	1.14645e+08	1.16167e+08	9.00696e+07	9.5299e+07	1.00036e+08	Acetyl [N-Term]
High	High	Master Protein	Q9H583	HEAT repeat-containing protein 1 OS=Homo sapiens GN=HEATR1 PE=1 SV=3	0	0	37	69	618	69	1	2144	242.2	6.54	14031	524.22	67	29	0	3.70532e+08	3.80945e+08	3.58807e+08	3.9813e+08	4.00367e+08	407169904	3.95661e+08	3.72011e+08	3.62068e+08
High	High	Master Protein	O60271	C-Jun-amino-terminal kinase-interacting protein 4 OS=Homo sapiens GN=SPAG9 PE=1 SV=4	0	0	52	54	471	49	1	1321	146.1	5.15	10628	524.13	53	21	5	1.84121e+08	1.85149e+08	1.90882e+08	2.50919e+08	2.76557e+08	2.64761e+08	2.30063e+08	2.4787e+08	2.31144e+08	Acetyl [N-Term]
High	High	Master Protein	Q9P2R3	Rabankyrin-5 OS=Homo sapiens GN=ANKFY1 PE=1 SV=2	0	0	43	35	419	34	1	1169	128.3	6.1	9294	524.1	34	21	0	1.7195e+08	1.77816e+08	1.91758e+08	2.48299e+08	2.53321e+08	2.60659e+08	2.03236e+08	1.99314e+08	2.0099e+08	Acetyl [N-Term]
High	High	Master Protein	Q5VT52	Regulation of nuclear pre-mRNA domain-containing protein 2 OS=Homo sapiens GN=RPRD2 PE=1 SV=1	0	0	59	52	491	52	1	1461	155.9	7.42	12074	523.74	52	32	0	2.29663e+08	2.3849e+08	2.33532e+08	2.89864e+08	2.85398e+08	2.90436e+08	2.42067e+08	2.36929e+08	2.26288e+08
High	High	Master Protein	Q9H0A0	RNA cytidine acetyltransferase OS=Homo sapiens GN=NAT10 PE=1 SV=2	0	0	55	47	515	47	1	1025	115.7	8.27	11760	523.71	46	23	0	5.24016e+08	5.31494e+08	5.14032e+08	6.70262e+08	6.9326e+08	7.05425e+08	5.51576e+08	5.76009e+08	5.81744e+08
High	High	Master Protein	O60306	Intron-binding protein aquarius OS=Homo sapiens GN=AQR PE=1 SV=4	0	0	43	53	473	52	1	1485	171.2	6.37	10468	522.98	51	25	1	3.44667e+08	3.51157e+08	3.44456e+08	3.8288e+08	3.85689e+08	3.5845e+08	3.3003e+08	3.28272e+08	3.17657e+08
High	High	Master Protein	O15042	U2 snRNP-associated SURP motif-containing protein OS=Homo sapiens GN=U2SURP PE=1 SV=2	0	0	50	46	503	45	1	1029	118.2	8.47	10987	522.86	46	19	0	4.65167e+08	4.87117e+08	4.59271e+08	5.71662e+08	5.54216e+08	5.66144e+08	4.76852e+08	4.90719e+08	4.71968e+08
High	High	Master Protein	Q8NB90	Spermatogenesis-associated protein 5 OS=Homo sapiens GN=SPATA5 PE=1 SV=3	0	0	58	38	393	37	1	893	97.8	5.66	8584	522.55	36	21	1	2.15458e+08	2.11956e+08	2.03521e+08	2.46605e+08	2.71624e+08	2.74841e+08	2.23505e+08	2.15626e+08	2.22478e+08
High	High	Master Protein	O43399	Tumor protein D54 OS=Homo sapiens GN=TPD52L2 PE=1 SV=2	0	0	78	19	382	19	1	206	22.2	5.36	9785	522.52	19	13	0	8.29824e+08	8.99223e+08	8.40681e+08	9.95369e+08	1.04518e+09	1.06529e+09	8.25125e+08	8.44773e+08	8.55461e+08	Acetyl [N-Term]
High	High	Master Protein	O00515	Ladinin-1 OS=Homo sapiens GN=LAD1 PE=1 SV=2	0	0	49	31	475	31	1	517	57.1	9.67	11069	521.94	31	17	0	5.22783e+08	528752650	5.38731e+08	6.11658e+08	6.55853e+08	6.40498e+08	5.07919e+08	5.1544e+08	4.56214e+08
High	High	Master Protein	P00966	Argininosuccinate synthase OS=Homo sapiens GN=ASS1 PE=1 SV=2	0	0	59	23	414	23	1	412	46.5	8.02	8718	521.34	23	11	0	8.99291e+08	9.38802e+08	8.64736e+08	1.23908e+09	1.22203e+09	1.21533e+09	1.10164e+09	1.11138e+09	1.1468e+09
High	High	Master Protein	P11908	Ribose-phosphate pyrophosphokinase 2 OS=Homo sapiens GN=PRPS2 PE=1 SV=2	0	0	60	17	417	7	1	318	34.7	6.61	10111	521.24	16	9	0	1.31729e+08	1.27713e+08	1.30643e+08	1.42887e+08	1.4198e+08	1.53222e+08	9.76462e+07	9.13273e+07	9.18139e+07
High	High	None	Q92928	Putative Ras-related protein Rab-1C OS=Homo sapiens GN=RAB1C PE=5 SV=2	0	0	36	8	389	4	1	201	22	5.43	9108	521.22	8	4	0	1.25483e+09	1.33839e+09	1.30607e+09	1.55554e+09	1.6274e+09	1.54185e+09	1.56937e+09	1.52574e+09	1.5072e+09
High	High	Master Protein	O14579	Coatomer subunit epsilon OS=Homo sapiens GN=COPE PE=1 SV=3	0	0	69	19	423	19	1	308	34.5	5.12	9258	519.38	19	9	0	6.09153e+08	6.10475e+08	5.82127e+08	751042877	8.32554e+08	8.18178e+08	7.14822e+08	776961561	6.64522e+08
High	High	Master Protein	P23368	NAD-dependent malic enzyme, mitochondrial OS=Homo sapiens GN=ME2 PE=1 SV=1	0	0	59	27	360	27	1	584	65.4	7.61	8458	517.99	27	14	0	3.83684e+08	4.29784e+08	3.88601e+08	5.21238e+08	5.01807e+08	4.93892e+08	4.96083e+08	4.93298e+08	4.68333e+08
High	High	Master Protein	O60784	Target of Myb protein 1 OS=Homo sapiens GN=TOM1 PE=1 SV=2	0	0	57	20	343	20	1	492	53.8	4.7	8389	517.85	20	12	0	1.31311e+08	1.07575e+08	1.15598e+08	1.46697e+08	1.45552e+08	1.47598e+08	1.27559e+08	1.33517e+08	1.27324e+08	Acetyl [N-Term]
High	High	Master Protein	O14787	Transportin-2 OS=Homo sapiens GN=TNPO2 PE=1 SV=3	0	0	48	34	518	24	1	897	101.3	5.01	9828	517.43	34	13	0	2.95948e+08	3.2321e+08	3.15562e+08	3.25454e+08	3.33239e+08	3.36262e+08	2.93409e+08	3.05042e+08	2.81254e+08
High	High	Master Protein	P51114	Fragile X mental retardation syndrome-related protein 1 OS=Homo sapiens GN=FXR1 PE=1 SV=3	0	0	53	35	418	32	1	621	69.7	6.15	10836	517.01	35	16	0	3.51135e+08	3.57982e+08	3.50506e+08	3.83216e+08	3.98652e+08	3.58109e+08	3.86512e+08	357746699	3.32e+08
High	High	Master Protein	Q8TAQ2	SWI/SNF complex subunit SMARCC2 OS=Homo sapiens GN=SMARCC2 PE=1 SV=1	0	0	42	54	594	44	1	1214	132.8	5.69	13641	515.2	54	22	11	6.76352e+08	6.43747e+08	6.21776e+08	8.09845e+08	8.45633e+08	8.22988e+08	7.78334e+08	7.59794e+08	7.70997e+08
High	High	Master Protein	O75822	Eukaryotic translation initiation factor 3 subunit J OS=Homo sapiens GN=EIF3J PE=1 SV=2	0	0	64	21	440	21	1	258	29	4.83	10797	514.46	21	12	0	7.48144e+08	6.21601e+08	6.42715e+08	7.1908e+08	7.53418e+08	7.37174e+08	6.94418e+08	7.24676e+08	6.52346e+08	Acetyl [N-Term]
High	High	Master Protein	P50542	Peroxisomal targeting signal 1 receptor OS=Homo sapiens GN=PEX5 PE=1 SV=3	0	0	58	25	319	25	1	639	70.8	4.54	6606	514.15	25	19	0	7.55974e+07	8.50475e+07	8.18726e+07	1.07055e+08	1.07876e+08	1.03214e+08	7.91765e+07	9.02515e+07	8.29189e+07
High	High	Master Protein	Q969V3	Nicalin OS=Homo sapiens GN=NCLN PE=1 SV=2	0	0	43	21	377	21	1	563	62.9	6.89	9958	513.2	21	13	0	2.26264e+08	2.27383e+08	2.21756e+08	3.00742e+08	3.0536e+08	2.86006e+08	2.60466e+08	2.56041e+08	255401230
High	High	Master Protein	Q13451	Peptidyl-prolyl cis-trans isomerase FKBP5 OS=Homo sapiens GN=FKBP5 PE=1 SV=2	0	0	67	35	474	35	1	457	51.2	5.9	10378	513.08	35	18	0	6.28523e+08	6.46107e+08	6.24515e+08	7.50097e+08	7.36183e+08	7.93297e+08	6.4286e+08	6.0663e+08	5.82028e+08	Acetyl [N-Term]
High	High	Master Protein	Q7Z4V5	Hepatoma-derived growth factor-related protein 2 OS=Homo sapiens GN=HDGFRP2 PE=1 SV=1	0	0	36	29	454	27	1	671	74.3	7.49	11083	512.76	29	14	1	3.83325e+08	3.84895e+08	3.6723e+08	4.79094e+08	4.69206e+08	4.96874e+08	4.43468e+08	4.43977e+08	4.58246e+08
High	High	Master Protein	P22087	rRNA 2'-O-methyltransferase fibrillarin OS=Homo sapiens GN=FBL PE=1 SV=2	0	0	66	27	561	27	1	321	33.8	10.18	13273	510.47	25	14	0	1.16746e+09	1.17638e+09	1.1496e+09	1.37231e+09	1.37945e+09	1.42559e+09	1.35854e+09	1.38402e+09	1.28201e+09
High	High	Master Protein	Q9Y4G6	Talin-2 OS=Homo sapiens GN=TLN2 PE=1 SV=4	0	0	24	47	464	28	1	2542	271.4	5.57	11369	510.09	45	27	0	1.71038e+07	1.98293e+07	1.75425e+07	1.81255e+07	2.17817e+07	2.3041e+07	2.28401e+07	2.01335e+07	2.16465e+07
High	High	Master Protein	Q9P265	Disco-interacting protein 2 homolog B OS=Homo sapiens GN=DIP2B PE=1 SV=3	0	0	47	52	417	47	1	1576	171.4	8.09	9325	509.77	50	31	4	1.9214e+08	1.91927e+08	1.8983e+08	2.57102e+08	2.64542e+08	2.56559e+08	2.88489e+08	2.77125e+08	2.82542e+08
High	High	Master Protein	Q14376	UDP-glucose 4-epimerase OS=Homo sapiens GN=GALE PE=1 SV=2	0	0	62	19	343	19	1	348	38.3	6.73	7719	509.31	18	10	0	2.56187e+08	2.50886e+08	2.4133e+08	3.40154e+08	3.79546e+08	3.45054e+08	2.45823e+08	2.33286e+08	2.37357e+08
High	High	Master Protein	Q7Z417	Nuclear fragile X mental retardation-interacting protein 2 OS=Homo sapiens GN=NUFIP2 PE=1 SV=1	0	0	54	28	422	28	1	695	76.1	8.7	10317	509.03	28	21	0	3.04589e+08	3.33482e+08	3.19227e+08	3.54477e+08	3.83709e+08	3.78627e+08	3.70933e+08	3.80477e+08	3.60542e+08
High	High	Master Protein	P22695	Cytochrome b-c1 complex subunit 2, mitochondrial OS=Homo sapiens GN=UQCRC2 PE=1 SV=3	0	0	46	17	398	17	1	453	48.4	8.63	9568	508.63	17	13	0	8.78806e+08	8.41846e+08	8.48412e+08	1.06996e+09	1.07774e+09	1.13592e+09	9.03242e+08	9.59889e+08	9.36324e+08
High	High	Master Protein	Q9Y485	DmX-like protein 1 OS=Homo sapiens GN=DMXL1 PE=1 SV=3	0	0	38	74	468	72	1	3027	337.6	6.34	9812	508.59	71	30	2	1.34778e+08	1.37021e+08	1.33434e+08	1.90544e+08	1.93735e+08	1.94171e+08	1.9765e+08	1.95986e+08	1.89044e+08	Acetyl [N-Term]
High	High	Master Protein	P08621	U1 small nuclear ribonucleoprotein 70 kDa OS=Homo sapiens GN=SNRNP70 PE=1 SV=2	0	0	54	24	452	24	1	437	51.5	9.94	8738	508.44	24	8	0	1.05166e+09	9.23314e+08	9.01457e+08	1.25878e+09	1.27195e+09	1.22278e+09	1.09604e+09	1.14222e+09	1.00514e+09	Acetyl [N-Term]
High	High	Master Protein	Q99590	Protein SCAF11 OS=Homo sapiens GN=SCAF11 PE=1 SV=2	0	0	37	34	422	34	1	1463	164.6	8.41	10186	507.7	33	25	0	1.75973e+08	1.64965e+08	1.55893e+08	2.26734e+08	2.34527e+08	2.34028e+08	1.81973e+08	1.92698e+08	1.94688e+08
High	High	Master Protein	O15294	UDP-N-acetylglucosamine--peptide N-acetylglucosaminyltransferase 110 kDa subunit OS=Homo sapiens GN=OGT PE=1 SV=3	0	0	55	44	482	44	1	1046	116.9	6.7	10517	507.61	44	20	0	4.04191e+08	3.85087e+08	3.77873e+08	4.71136e+08	4.81162e+08	4.59508e+08	4.43783e+08	4.36114e+08	4.38476e+08	Acetyl [N-Term]
High	High	Master Protein	Q92793	CREB-binding protein OS=Homo sapiens GN=CREBBP PE=1 SV=3	0	0	25	48	425	29	1	2442	265.2	8.53	8957	507.54	48	23	1	4.75589e+07	4.42346e+07	4.43697e+07	6.29544e+07	6.48189e+07	6.50914e+07	5.75195e+07	5.68318e+07	5.63422e+07	Acetyl [N-Term]
High	High	Master Protein	Q92804	TATA-binding protein-associated factor 2N OS=Homo sapiens GN=TAF15 PE=1 SV=1	0	0	45	21	542	19	1	592	61.8	8.02	13914	507.44	21	10	2	2.07227e+09	2.25519e+09	2.17329e+09	2.75643e+09	2.92419e+09	2.7303e+09	2.79067e+09	2.58096e+09	2.80175e+09
High	High	Master Protein	Q9H6S0	Probable ATP-dependent RNA helicase YTHDC2 OS=Homo sapiens GN=YTHDC2 PE=1 SV=2	0	0	50	53	485	53	1	1430	160.1	8.4	12704	507.2	51	28	0	2.1603e+08	2.24218e+08	2.15216e+08	2.80762e+08	2.79556e+08	2.78217e+08	2.60209e+08	2.4656e+08	2.47245e+08	Acetyl [N-Term]
High	High	Master Protein	P15374	Ubiquitin carboxyl-terminal hydrolase isozyme L3 OS=Homo sapiens GN=UCHL3 PE=1 SV=1	0	0	76	16	337	16	1	230	26.2	4.92	6889	506.98	16	12	0	4.90579e+08	4.82878e+08	4.56426e+08	5.71858e+08	5.90986e+08	5.35728e+08	5.1541e+08	5.16982e+08	5.06285e+08
High	High	Master Protein	P21291	Cysteine and glycine-rich protein 1 OS=Homo sapiens GN=CSRP1 PE=1 SV=3	0	0	68	13	390	13	1	193	20.6	8.57	10163	506.97	13	7	0	7.3625e+08	8.27185e+08	7.40274e+08	9.08507e+08	1.00631e+09	1.03484e+09	6.32107e+08	6.34874e+08	6.75957e+08
High	High	Master Protein	Q16836	Hydroxyacyl-coenzyme A dehydrogenase, mitochondrial OS=Homo sapiens GN=HADH PE=1 SV=3	0	0	68	14	291	14	1	314	34.3	8.85	7902	506.5	14	8	0	4.04755e+08	4.45569e+08	4.16842e+08	5.61133e+08	6.23376e+08	6.28918e+08	4.68244e+08	5.18909e+08	4.71785e+08
High	High	Master Protein	Q16643	Drebrin OS=Homo sapiens GN=DBN1 PE=1 SV=4	0	0	61	32	465	31	1	649	71.4	4.45	11144	506.37	32	12	1	5.7064e+08	5.69051e+08	5.31834e+08	7.24308e+08	7.48832e+08	7.419e+08	7.87494e+08	7.80919e+08	8.03801e+08	Acetyl [N-Term]
High	High	Master Protein	Q16512	Serine/threonine-protein kinase N1 OS=Homo sapiens GN=PKN1 PE=1 SV=2	0	0	55	41	439	38	1	942	103.9	6.37	10532	506.25	40	20	0	2.02652e+08	2.20746e+08	1.98194e+08	2.61282e+08	2.69104e+08	2.63764e+08	2.61621e+08	2.69468e+08	2.50837e+08	Acetyl [N-Term]
High	High	Master Protein	Q12849	G-rich sequence factor 1 OS=Homo sapiens GN=GRSF1 PE=1 SV=3	0	0	66	24	409	24	1	480	53.1	6.19	9004	504.6	22	13	0	3.54325e+08	3.44907e+08	3.36208e+08	3.84416e+08	4.06261e+08	4.12925e+08	3.46343e+08	3.78905e+08	3.62034e+08
High	High	Master Protein	Q562R1	Beta-actin-like protein 2 OS=Homo sapiens GN=ACTBL2 PE=1 SV=2	0	0	28	8	540	2	1	376	42	5.59	12067	504.57	7	4	0	2.5643e+06	2.85153e+06	2.59278e+06	2.82014e+06	4.00677e+06	3.05718e+06	4.13328e+06	2.72177e+06	2.38349e+06
High	High	Master Protein	P35573	Glycogen debranching enzyme OS=Homo sapiens GN=AGL PE=1 SV=3	0	0	48	53	469	53	1	1532	174.7	6.76	10593	504.38	51	31	0	2.02024e+08	2.06426e+08	2.03809e+08	2.35606e+08	2.46639e+08	2.35474e+08	2.42701e+08	2.54561e+08	2.4286e+08
High	High	Master Protein	Q8N3C0	Activating signal cointegrator 1 complex subunit 3 OS=Homo sapiens GN=ASCC3 PE=1 SV=3	0	0	44	73	562	73	1	2202	251.3	7.09	13056	503.22	72	28	0	2.54543e+08	2.59859e+08	2.48183e+08	2.98976e+08	3.24986e+08	3.37552e+08	2.97257e+08	3.06549e+08	2.98917e+08
High	High	Master Protein	Q5H9R7	Serine/threonine-protein phosphatase 6 regulatory subunit 3 OS=Homo sapiens GN=PPP6R3 PE=1 SV=2	0	0	47	37	526	36	1	873	97.6	4.6	11916	501.95	37	21	1	4.03837e+08	434708065	4.15733e+08	4.04249e+08	4.14438e+08	4.0938e+08	4.17833e+08	3.999e+08	4.11407e+08
High	High	Master Protein	Q7Z5J4	Retinoic acid-induced protein 1 OS=Homo sapiens GN=RAI1 PE=1 SV=2	0	0	38	47	342	47	1	1906	203.2	8.79	7641	500.8	43	28	0	6.08849e+07	5.9125e+07	5.88384e+07	77457581	7.88674e+07	7.48965e+07	6.10054e+07	6.32907e+07	6.27947e+07
High	High	Master Protein	P60900	Proteasome subunit alpha type-6 OS=Homo sapiens GN=PSMA6 PE=1 SV=1	0	0	68	16	490	16	1	246	27.4	6.76	12755	500.49	16	8	0	1.4754e+09	1.68689e+09	1.49707e+09	2.05755e+09	2.20776e+09	2.12935e+09	1.94428e+09	2.07314e+09	2.04081e+09
High	High	Master Protein	O15143	Actin-related protein 2/3 complex subunit 1B OS=Homo sapiens GN=ARPC1B PE=1 SV=3	0	0	50	16	306	14	1	372	40.9	8.35	7538	500.48	16	10	0	2.98087e+08	2.8092e+08	2.604e+08	4.41797e+08	4.28841e+08	4.21234e+08	3.65152e+08	3.63629e+08	3.55981e+08	Acetyl [N-Term]
High	High	Master Protein	Q06124	Tyrosine-protein phosphatase non-receptor type 11 OS=Homo sapiens GN=PTPN11 PE=1 SV=2	0	0	73	38	514	38	1	597	68.4	7.3	12354	500.23	38	17	0	5.02272e+08	5.21098e+08	5.15829e+08	6.27974e+08	6.30456e+08	6.51886e+08	5.75926e+08	6.0284e+08	5.85166e+08
High	High	Master Protein	P31153	S-adenosylmethionine synthase isoform type-2 OS=Homo sapiens GN=MAT2A PE=1 SV=1	0	0	63	20	424	18	1	395	43.6	6.48	9733	499.5	20	11	2	6.75643e+08	7.96432e+08	7.66957e+08	1.04938e+09	1.04914e+09	9.85033e+08	8.24231e+08	866690272	8.5778e+08
High	High	Master Protein	Q8IYD1	Eukaryotic peptide chain release factor GTP-binding subunit ERF3B OS=Homo sapiens GN=GSPT2 PE=1 SV=2	0	0	39	20	412	5	1	628	68.8	5.43	8628	499.26	20	11	0	1.06048e+08	1.42444e+08	9.69299e+07	1.69014e+08	1.67174e+08	1.46269e+08	1.41944e+08	1.4904e+08	1.532e+08
High	High	Master Protein	P30044	Peroxiredoxin-5, mitochondrial OS=Homo sapiens GN=PRDX5 PE=1 SV=4	0	0	61	12	379	12	1	214	22.1	8.7	7790	499.05	11	8	0	1.07628e+09	1.14279e+09	1.15797e+09	1.68182e+09	1.60565e+09	1.6669e+09	1.60666e+09	1.49094e+09	1.65808e+09
High	High	Master Protein	P53041	Serine/threonine-protein phosphatase 5 OS=Homo sapiens GN=PPP5C PE=1 SV=1	0	0	57	26	463	26	1	499	56.8	6.28	11137	498.59	26	12	0	3.03214e+08	3.07964e+08	2.82906e+08	4.09151e+08	3.87506e+08	3.83742e+08	3.50945e+08	3.64037e+08	3.78907e+08	Acetyl [N-Term]
High	High	Master Protein	P53582	Methionine aminopeptidase 1 OS=Homo sapiens GN=METAP1 PE=1 SV=2	0	0	69	24	382	24	1	386	43.2	7.17	8848	497.86	23	14	0	3.03998e+08	3.07816e+08	3.3416e+08	3.86896e+08	4.0691e+08	3.92068e+08	3.63285e+08	3.77482e+08	3.73026e+08
High	High	Master Protein	Q9BR76	Coronin-1B OS=Homo sapiens GN=CORO1B PE=1 SV=1	0	0	44	20	367	19	1	489	54.2	5.88	7747	497.68	20	10	1	9.03221e+08	8.92579e+08	8.90006e+08	1.02861e+09	1.02219e+09	1.03044e+09	1.0928e+09	1.15355e+09	1.09782e+09
High	High	Master Protein	Q9BUJ2	Heterogeneous nuclear ribonucleoprotein U-like protein 1 OS=Homo sapiens GN=HNRNPUL1 PE=1 SV=2	0	0	41	31	421	30	1	856	95.7	6.92	9450	497.53	31	17	0	4.45414e+08	5.08442e+08	4.53428e+08	6.33969e+08	6.50686e+08	6.52562e+08	6.16301e+08	6.22008e+08	6.48495e+08
High	High	Master Protein	Q9BXP5	Serrate RNA effector molecule homolog OS=Homo sapiens GN=SRRT PE=1 SV=1	0	0	43	47	557	47	1	876	100.6	5.96	11967	496.63	47	17	0	8.83699e+08	9.10963e+08	8.94404e+08	1.10658e+09	1.16566e+09	1.2178e+09	1.02493e+09	1.0592e+09	1.01772e+09
High	High	Master Protein	Q9P2M7	Cingulin OS=Homo sapiens GN=CGN PE=1 SV=2	0	0	49	52	493	51	1	1197	136.3	5.54	11642	496.29	52	27	1	2.00964e+08	1.94289e+08	1.89787e+08	2.59434e+08	2.65299e+08	2.68755e+08	2.36334e+08	2.33568e+08	2.30997e+08
High	High	Master Protein	P13807	Glycogen [starch] synthase, muscle OS=Homo sapiens GN=GYS1 PE=1 SV=2	0	0	58	32	365	32	1	737	83.7	6.18	7953	495.86	32	19	0	2.54584e+08	2.55326e+08	2.3498e+08	3.23371e+08	3.24461e+08	3.09072e+08	3.51266e+08	3.46626e+08	3.29533e+08
High	High	Master Protein	O43684	Mitotic checkpoint protein BUB3 OS=Homo sapiens GN=BUB3 PE=1 SV=1	0	0	65	16	380	16	1	328	37.1	6.84	9366	495.27	16	9	0	8.54642e+08	1.02128e+09	9.01044e+08	1.16052e+09	1.25649e+09	1.12698e+09	9.73016e+08	9.92754e+08	9.25126e+08
High	High	Master Protein	Q8TBA6	Golgin subfamily A member 5 OS=Homo sapiens GN=GOLGA5 PE=1 SV=3	0	0	66	39	406	39	1	731	83	5.83	10563	494.95	39	21	0	1.67453e+08	1.83368e+08	1.8248e+08	2.48777e+08	2.5967e+08	2.50265e+08	2.44445e+08	2.37912e+08	2.31319e+08	Acetyl [N-Term]
High	High	Master Protein	O75146	Huntingtin-interacting protein 1-related protein OS=Homo sapiens GN=HIP1R PE=1 SV=2	0	0	49	47	469	45	1	1068	119.3	6.67	10877	494.81	46	20	2	2.44561e+08	2.40612e+08	2.36883e+08	3.003e+08	3.09247e+08	3.02165e+08	2.52412e+08	2.65183e+08	2.50628e+08
High	High	Master Protein	Q9Y5S9	RNA-binding protein 8A OS=Homo sapiens GN=RBM8A PE=1 SV=1	0	0	78	11	493	11	1	174	19.9	5.72	14596	494.19	11	6	0	6.82977e+08	6.21019e+08	6.55703e+08	7.08497e+08	7.51711e+08	7.61001e+08	6.6211e+08	6.68963e+08	6.35411e+08	Acetyl [N-Term]
High	High	Master Protein	P68400	Casein kinase II subunit alpha OS=Homo sapiens GN=CSNK2A1 PE=1 SV=1	0	0	61	24	399	22	1	391	45.1	7.74	7646	493.39	24	13	2	7.18106e+08	7.53186e+08	7.04121e+08	8.83065e+08	9.3046e+08	8.86766e+08	8.61817e+08	8.97253e+08	8.03652e+08
High	High	Master Protein	P61981	14-3-3 protein gamma OS=Homo sapiens GN=YWHAG PE=1 SV=2	0	0	79	20	829	13	1	247	28.3	4.89	19208	492.39	20	8	7	4.75957e+09	5.07452e+09	4.06393e+09	6.09276e+09	6.32387e+09	6.10191e+09	6.2164e+09	5.43544e+09	6.40025e+09	Acetyl [N-Term; N-Term]
High	High	Master Protein	P35527	Keratin, type I cytoskeletal 9 OS=Homo sapiens GN=KRT9 PE=1 SV=3	0	0	57	27	347	26	1	623	62	5.24	9900	491.75	26	16	0	2.59606e+08	2.51928e+08	2.39223e+08	2.59078e+08	2.64474e+08	2.71882e+08	3.7785e+08	3.59451e+08	365069445
High	High	Master Protein	P42356	Phosphatidylinositol 4-kinase alpha OS=Homo sapiens GN=PI4KA PE=1 SV=4	0	0	39	63	493	63	1	2102	236.7	7.06	12570	491.71	62	24	0	1.21695e+08	1.29593e+08	1.25885e+08	1.54105e+08	1.51151e+08	1.48983e+08	1.29751e+08	1.29551e+08	1.20342e+08
High	High	Master Protein	Q9Y383	Putative RNA-binding protein Luc7-like 2 OS=Homo sapiens GN=LUC7L2 PE=1 SV=2	0	0	55	26	551	18	1	392	46.5	10.01	13775	491.41	26	11	10	1.3085e+09	1.24182e+09	1.29115e+09	1.56947e+09	1.59626e+09	1.70007e+09	1.38568e+09	1.44901e+09	1.41361e+09	Acetyl [N-Term]
High	High	Master Protein	Q9UKK9	ADP-sugar pyrophosphatase OS=Homo sapiens GN=NUDT5 PE=1 SV=1	0	0	86	14	359	14	1	219	24.3	4.94	7392	491.35	14	10	0	3.73863e+08	370734896	3.63556e+08	3.9598e+08	4.18019e+08	3.8587e+08	3.79635e+08	3.81422e+08	3.78251e+08	Acetyl [N-Term]
High	High	Master Protein	Q9H078	Caseinolytic peptidase B protein homolog OS=Homo sapiens GN=CLPB PE=1 SV=1	0	0	50	26	383	26	1	707	78.7	9.01	8760	491.16	25	13	0	3.39915e+08	3.58451e+08	3.4319e+08	3.6848e+08	4.18012e+08	392084213	3.49817e+08	3.54265e+08	3.30326e+08
High	High	Master Protein	P42858	Huntingtin OS=Homo sapiens GN=HTT PE=1 SV=2	0	0	23	47	401	47	1	3142	347.4	6.2	9535	490.8	45	22	0	6.65526e+07	7.35556e+07	6.71166e+07	9.24231e+07	9.19974e+07	9.02749e+07	8.01686e+07	7.9675e+07	7.85955e+07
High	High	Master Protein	P55735	Protein SEC13 homolog OS=Homo sapiens GN=SEC13 PE=1 SV=3	0	0	70	21	420	21	1	322	35.5	5.48	9046	490.21	21	14	0	7.78337e+08	6.87149e+08	7.12382e+08	9.62482e+08	9.30534e+08	9.36667e+08	8.81274e+08	8.74743e+08	8.35562e+08	Acetyl [N-Term]
High	High	Master Protein	O15084	Serine/threonine-protein phosphatase 6 regulatory ankyrin repeat subunit A OS=Homo sapiens GN=ANKRD28 PE=1 SV=5	0	0	43	29	375	25	1	1053	112.9	6.25	9840	489.79	28	17	4	1.19119e+08	1.18616e+08	1.1954e+08	1.53546e+08	1.56136e+08	1.4961e+08	1.45105e+08	1.45341e+08	1.49282e+08
High	High	Master Protein	P18085	ADP-ribosylation factor 4 OS=Homo sapiens GN=ARF4 PE=1 SV=3	0	0	68	11	519	6	1	180	20.5	7.14	12314	489.61	11	5	0	6.8872e+08	6.868e+08	7.07523e+08	7.24963e+08	7.11699e+08	7.18568e+08	7.30718e+08	7.68222e+08	7.15005e+08
High	High	Master Protein	P05141	ADP/ATP translocase 2 OS=Homo sapiens GN=SLC25A5 PE=1 SV=7	0	0	52	23	685	10	1	298	32.8	9.69	14233	489.21	23	9	0	7.39999e+08	7.69849e+08	7.0436e+08	9.64895e+08	1.0469e+09	9.62064e+08	9.09517e+08	8.45723e+08	7.62049e+08	Acetyl [N-Term; N-Term]
High	High	Master Protein	O60313	Dynamin-like 120 kDa protein, mitochondrial OS=Homo sapiens GN=OPA1 PE=1 SV=3	0	0	53	52	539	52	1	960	111.6	7.87	12145	489.15	51	26	0	3.79346e+08	4.01551e+08	3.95647e+08	4.96439e+08	5.07214e+08	4.87755e+08	4.38194e+08	4.43754e+08	4.16574e+08
High	High	Master Protein	Q9H0B6	Kinesin light chain 2 OS=Homo sapiens GN=KLC2 PE=1 SV=1	0	0	70	38	441	28	1	622	68.9	7.15	10453	489.15	36	19	1	1.36873e+08	1.40844e+08	1.32273e+08	1.98012e+08	2.01094e+08	2.02076e+08	1.72347e+08	1.72048e+08	1.64957e+08
High	High	Master Protein	O95202	LETM1 and EF-hand domain-containing protein 1, mitochondrial OS=Homo sapiens GN=LETM1 PE=1 SV=1	0	0	50	31	366	30	1	739	83.3	6.7	8024	489.1	30	20	0	3.46713e+08	3.4321e+08	3.6998e+08	3.55717e+08	3.74893e+08	3.96566e+08	3.51229e+08	3.79844e+08	3.48207e+08
High	High	Master Protein	P26232	Catenin alpha-2 OS=Homo sapiens GN=CTNNA2 PE=1 SV=5	0	0	17	14	369	2	1	953	105.2	5.71	9573	489.05	14	8	0
High	High	Master Protein	Q27J81	Inverted formin-2 OS=Homo sapiens GN=INF2 PE=1 SV=2	0	0	48	44	337	43	1	1249	135.5	5.38	7043	489	43	27	1	1.63232e+08	1.6135e+08	1.52572e+08	1.9074e+08	1.73862e+08	1.84537e+08	1.65748e+08	1.64476e+08	1.72388e+08
High	High	Master Protein	Q9NQR4	Omega-amidase NIT2 OS=Homo sapiens GN=NIT2 PE=1 SV=1	0	0	81	17	373	17	1	276	30.6	7.21	8425	488.96	16	13	0	4.61685e+08	5.22747e+08	4.88475e+08	6.21395e+08	703772045	7.07685e+08	6.71624e+08	6.86227e+08	6.59816e+08
High	High	Master Protein	Q9H6S3	Epidermal growth factor receptor kinase substrate 8-like protein 2 OS=Homo sapiens GN=EPS8L2 PE=1 SV=2	0	0	50	28	361	28	1	715	80.6	6.84	7972	488.32	28	15	0	2.12782e+08	2.30777e+08	2.24472e+08	2.4035e+08	2.33205e+08	2.35344e+08	2.1549e+08	2.10679e+08	2.07732e+08	Acetyl [N-Term]
High	High	Master Protein	P51003	Poly(A) polymerase alpha OS=Homo sapiens GN=PAPOLA PE=1 SV=4	0	0	57	36	436	26	1	745	82.8	7.37	10763	488.1	36	19	10	2.73872e+08	2.64312e+08	2.60095e+08	3.04931e+08	2.95069e+08	2.94697e+08	2.67234e+08	2.57932e+08	2.60244e+08
High	High	Master Protein	Q7Z3T8	Zinc finger FYVE domain-containing protein 16 OS=Homo sapiens GN=ZFYVE16 PE=1 SV=3	0	0	45	43	358	43	1	1539	168.8	4.82	7830	487.51	39	26	0	8.96424e+07	9.30241e+07	9.75334e+07	1.22151e+08	1.27374e+08	1.25594e+08	1.34765e+08	1.34005e+08	1.27634e+08
High	High	Master Protein	Q9NP61	ADP-ribosylation factor GTPase-activating protein 3 OS=Homo sapiens GN=ARFGAP3 PE=1 SV=1	0	0	51	23	353	23	1	516	56.9	7.36	8644	487.32	23	14	0	2.07384e+08	2.15644e+08	2.10021e+08	3.15165e+08	3.27236e+08	2.98344e+08	2.86471e+08	2.87955e+08	2.6954e+08
High	High	Master Protein	Q01085	Nucleolysin TIAR OS=Homo sapiens GN=TIAL1 PE=1 SV=1	0	0	53	16	369	13	1	375	41.6	7.74	8416	486.21	14	13	4	4.30476e+08	3.88821e+08	3.92249e+08	4.79837e+08	4.98274e+08	5.08188e+08	4.53617e+08	4.89467e+08	4.83344e+08
High	High	Master Protein	Q14573	Inositol 1,4,5-trisphosphate receptor type 3 OS=Homo sapiens GN=ITPR3 PE=1 SV=2	0	0	29	56	459	50	1	2671	303.9	6.48	11648	486.09	56	27	5	1.32934e+08	1.37018e+08	1.3164e+08	1.53633e+08	1.63362e+08	1.58773e+08	1.4478e+08	1.45459e+08	1.34966e+08
High	High	Master Protein	Q00688	Peptidyl-prolyl cis-trans isomerase FKBP3 OS=Homo sapiens GN=FKBP3 PE=1 SV=1	0	0	54	12	329	12	1	224	25.2	9.28	8081	485.78	12	7	0	1.33062e+09	1.2952e+09	1.18824e+09	1.62447e+09	1.50684e+09	1.53425e+09	1.58681e+09	1.53346e+09	1.58845e+09
High	High	Master Protein	Q13616	Cullin-1 OS=Homo sapiens GN=CUL1 PE=1 SV=2	0	0	51	37	412	37	1	776	89.6	8	9615	484.96	37	20	0	3.43739e+08	3.54785e+08	3.32522e+08	4.02324e+08	4.17501e+08	4.21942e+08	4.34156e+08	4.09381e+08	4.13922e+08
High	High	Master Protein	P60228	Eukaryotic translation initiation factor 3 subunit E OS=Homo sapiens GN=EIF3E PE=1 SV=1	0	0	69	26	540	26	1	445	52.2	6.04	13208	484.91	26	10	0	1.37615e+09	1.5152e+09	1.45021e+09	1.6759e+09	1.83081e+09	1.85064e+09	1.59664e+09	1.65907e+09	1.60931e+09	Acetyl [N-Term]
High	High	Master Protein	Q04837	Single-stranded DNA-binding protein, mitochondrial OS=Homo sapiens GN=SSBP1 PE=1 SV=1	0	0	59	8	298	8	1	148	17.2	9.6	6576	484.21	8	5	0	4.81567e+08	5.51966e+08	4.61167e+08	6.59034e+08	6.40697e+08	6.25779e+08	5.60618e+08	530451852	5.0468e+08
High	High	Master Protein	Q9NTK5	Obg-like ATPase 1 OS=Homo sapiens GN=OLA1 PE=1 SV=2	0	0	76	27	527	27	1	396	44.7	7.81	12088	483.58	26	14	0	1.34758e+09	1.46466e+09	1.42261e+09	1.97952e+09	1.91496e+09	1.83884e+09	1.80232e+09	1.75433e+09	1.75525e+09
High	High	Master Protein	P12955	Xaa-Pro dipeptidase OS=Homo sapiens GN=PEPD PE=1 SV=3	0	0	49	18	330	18	1	493	54.5	6	9400	482.35	18	7	0	2.68684e+08	2.64651e+08	2.55258e+08	3.21192e+08	3.3968e+08	3.46104e+08	3.49541e+08	3.41475e+08	3.44931e+08	Acetyl [N-Term]
High	High	Master Protein	P51570	Galactokinase OS=Homo sapiens GN=GALK1 PE=1 SV=1	0	0	59	24	367	24	1	392	42.2	6.46	7853	481.5	24	12	0	3.47531e+08	3.71798e+08	3.6457e+08	434477347	4.61064e+08	4.80868e+08	4.06524e+08	4.11994e+08	4.1697e+08	Acetyl [N-Term; N-Term]
High	High	Master Protein	Q86U42	Polyadenylate-binding protein 2 OS=Homo sapiens GN=PABPN1 PE=1 SV=3	0	0	51	11	384	11	1	306	32.7	5.06	8569	481.23	9	7	0	3.44961e+08	362247976	345215321	4.57425e+08	5.22374e+08	4.94821e+08	3.80817e+08	4.26461e+08	3.99799e+08	Acetyl [N-Term; N-Term]
High	High	Master Protein	P23786	Carnitine O-palmitoyltransferase 2, mitochondrial OS=Homo sapiens GN=CPT2 PE=1 SV=2	0	0	56	34	467	34	1	658	73.7	8.18	10516	481.22	34	18	0	5.45667e+08	5.15544e+08	5.20821e+08	6.93405e+08	7.40331e+08	7.52989e+08	6.72878e+08	6.90801e+08	6.78596e+08
High	High	Master Protein	O95232	Luc7-like protein 3 OS=Homo sapiens GN=LUC7L3 PE=1 SV=2	0	0	45	21	404	20	1	432	51.4	9.79	10736	480.94	21	8	0	3.91739e+08	3.91273e+08	3.6914e+08	5.08751e+08	5.24914e+08	5.24671e+08	4.92114e+08	4.8939e+08	5.07824e+08	Acetyl [N-Term]
High	High	Master Protein	Q02978	Mitochondrial 2-oxoglutarate/malate carrier protein OS=Homo sapiens GN=SLC25A11 PE=1 SV=3	0	0	63	19	485	19	1	314	34	9.91	14602	480.23	19	5	0	7.70846e+08	7.7065e+08	7.757e+08	1.02501e+09	1.0562e+09	1.02845e+09	9.31812e+08	9.23148e+08	8.70468e+08	Acetyl [N-Term]
High	High	Master Protein	O60884	DnaJ homolog subfamily A member 2 OS=Homo sapiens GN=DNAJA2 PE=1 SV=1	0	0	64	19	357	19	1	412	45.7	6.48	7387	480.17	19	11	0	5.91979e+08	5.88829e+08	5.15191e+08	6.29351e+08	6.68969e+08	6.91747e+08	6.85939e+08	6.59561e+08	6.54918e+08
High	High	Master Protein	P61160	Actin-related protein 2 OS=Homo sapiens GN=ACTR2 PE=1 SV=1	0	0	53	20	407	20	1	394	44.7	6.74	9118	480.09	20	11	0	6.55728e+08	6.96624e+08	6.53945e+08	9.32147e+08	9.32173e+08	8.84391e+08	7.87516e+08	8.0909e+08	7.88527e+08	Acetyl [N-Term]
High	High	None	Q8NEV1	Casein kinase II subunit alpha 3 OS=Homo sapiens GN=CSNK2A3 PE=1 SV=2	0	0	54	21	375	19	1	391	45.2	8.5	6914	479.83	21	12	0	6.27658e+08	6.57357e+08	6.17553e+08	7.54958e+08	7.82093e+08	7.57432e+08	7.19982e+08	7.57691e+08	6.72166e+08
High	High	Master Protein	Q9UEW8	STE20/SPS1-related proline-alanine-rich protein kinase OS=Homo sapiens GN=STK39 PE=1 SV=3	0	0	53	22	405	17	1	545	59.4	6.29	8947	479.65	22	12	7	5.59708e+08	6.33634e+08	5.92961e+08	6.76619e+08	7.38705e+08	7.20858e+08	6.57602e+08	6.61203e+08	6.14418e+08
High	High	Master Protein	Q15418	Ribosomal protein S6 kinase alpha-1 OS=Homo sapiens GN=RPS6KA1 PE=1 SV=2	0	0	67	41	438	30	1	735	82.7	7.83	9390	478.46	39	22	13	3.88885e+08	3.81073e+08	3.54014e+08	4.95556e+08	5.0379e+08	5.09812e+08	4.42365e+08	4.32833e+08	4.04414e+08
High	High	Master Protein	Q9H4A3	Serine/threonine-protein kinase WNK1 OS=Homo sapiens GN=WNK1 PE=1 SV=2	0	0	25	42	410	36	1	2382	250.6	6.34	9173	478.4	42	20	6	1.92528e+08	1.84702e+08	1.70357e+08	2.27115e+08	2.29765e+08	2.16736e+08	2.26568e+08	2.17493e+08	2.15754e+08
High	High	Master Protein	Q14914	Prostaglandin reductase 1 OS=Homo sapiens GN=PTGR1 PE=1 SV=2	0	0	58	15	409	15	1	329	35.8	8.29	9698	477.33	14	9	0	3.86982e+08	3.90543e+08	3.7499e+08	4.57697e+08	4.92454e+08	4.71018e+08	5.03265e+08	5.42915e+08	4.89534e+08
High	High	Master Protein	Q14677	Clathrin interactor 1 OS=Homo sapiens GN=CLINT1 PE=1 SV=1	0	0	33	19	402	19	1	625	68.2	6.42	9015	476.88	19	11	0	3.38395e+08	3.48911e+08	3.63805e+08	4.61092e+08	5.24265e+08	5.03494e+08	4.39311e+08	469907764	4.48923e+08
High	High	Master Protein	Q9UIQ6	Leucyl-cystinyl aminopeptidase OS=Homo sapiens GN=LNPEP PE=1 SV=3	0	0	35	28	376	28	1	1025	117.3	5.73	8479	476.86	28	12	0	2.07509e+08	2.10517e+08	2.05985e+08	2.20148e+08	2.31308e+08	2.1284e+08	2.07422e+08	2.03787e+08	2.0942e+08
High	High	Master Protein	Q96QR8	Transcriptional activator protein Pur-beta OS=Homo sapiens GN=PURB PE=1 SV=3	0	0	65	15	283	14	1	312	33.2	5.43	7032	475.71	15	8	0	2.1769e+08	2.15656e+08	2.04777e+08	2.13672e+08	2.18553e+08	2.26795e+08	2.22217e+08	2.16549e+08	2.19989e+08	Acetyl [N-Term; N-Term]
High	High	Master Protein	Q9UKV8	Protein argonaute-2 OS=Homo sapiens GN=AGO2 PE=1 SV=3	0	0	59	37	379	30	1	859	97.1	9.19	7885	475	37	19	8	1.51214e+08	1.59786e+08	1.46812e+08	2.69109e+08	2.75378e+08	2.63184e+08	2.78702e+08	2.78116e+08	2.75189e+08	Acetyl [N-Term]
High	High	Master Protein	P62987	Ubiquitin-60S ribosomal protein L40 OS=Homo sapiens GN=UBA52 PE=1 SV=2	0	0	47	7	855	2	1	128	14.7	9.83	20176	474.83	7	3	0	3.18162e+07	3.37477e+07	2.27731e+07	3.3458e+07	5.19628e+07	1.18162e+07	5.93922e+07	5.89457e+07	2.16848e+07
High	High	None	P0CG47	Polyubiquitin-B OS=Homo sapiens GN=UBB PE=1 SV=1	0	0	64	5	829	0	2	229	25.7	7.43	19482	474.83	5	3	0	1.49712e+10	9.88664e+09	1.35999e+10	1.44164e+10	1.45964e+10	1.4677e+10	1.19292e+10	1.29917e+10	1.21e+10
High	High	None	P0CG48	Polyubiquitin-C OS=Homo sapiens GN=UBC PE=1 SV=3	0	0	64	5	829	0	2	685	77	7.66	19482	474.83	5	3	0	1.49712e+10	9.88664e+09	1.35999e+10	1.44164e+10	1.45964e+10	1.4677e+10	1.19292e+10	1.29917e+10	1.21e+10
High	High	Master Protein	Q92797	Symplekin OS=Homo sapiens GN=SYMPK PE=1 SV=2	0	0	51	51	431	51	1	1274	141.1	6.13	9125	474.7	51	20	0	1.64492e+08	1.63327e+08	1.52504e+08	1.69685e+08	1.74319e+08	1.70877e+08	1.30999e+08	1.34879e+08	1.28661e+08
High	High	Master Protein Rejected	A6NKT7	RanBP2-like and GRIP domain-containing protein 3 OS=Homo sapiens GN=RGPD3 PE=4 SV=2	0	0	35	53	573	0	0	1758	197.4	6.33	14347	474.53	53	25	0
High	High	Master Protein	Q9UNX4	WD repeat-containing protein 3 OS=Homo sapiens GN=WDR3 PE=1 SV=1	0	0	54	42	419	42	1	943	106	6.64	8486	474.5	42	20	0	2.91019e+08	2.88524e+08	2.73249e+08	2.85482e+08	2.94362e+08	2.89509e+08	2.84813e+08	2.81087e+08	2.78255e+08
High	High	Master Protein	Q9BTE6	Alanyl-tRNA editing protein Aarsd1 OS=Homo sapiens GN=AARSD1 PE=1 SV=2	0	0	64	21	325	21	1	412	45.5	6.42	6995	474.37	21	13	0	2.52433e+08	2.5416e+08	2.45534e+08	3.17231e+08	3.1971e+08	3.29706e+08	2.85833e+08	2.96307e+08	2.79488e+08
High	High	Master Protein	O75607	Nucleoplasmin-3 OS=Homo sapiens GN=NPM3 PE=1 SV=3	0	0	65	7	263	7	1	178	19.3	4.63	7114	474.27	7	5	0	3.75801e+08	3.87896e+08	3.53031e+08	4.84604e+08	467317982	4.57257e+08	5.12748e+08	4.50452e+08	4.71614e+08	Acetyl [N-Term]
High	High	None	P24844	Myosin regulatory light polypeptide 9 OS=Homo sapiens GN=MYL9 PE=1 SV=4	0	0	38	8	336	8	1	172	19.8	4.92	7557	473.16	8	7	0	1.08107e+09	1.15439e+09	1.06398e+09	1.18329e+09	1.16445e+09	1.12583e+09	1.03898e+09	1.0759e+09	9.99857e+08
High	High	Master Protein	Q9P260	LisH domain and HEAT repeat-containing protein KIAA1468 OS=Homo sapiens GN=KIAA1468 PE=1 SV=2	0	0	43	39	360	39	1	1216	134.5	5.45	8423	472.99	37	24	0	2.22201e+08	2.53118e+08	2.43624e+08	2.87326e+08	3.07214e+08	2.74101e+08	2.87091e+08	2.88556e+08	2.82181e+08
High	High	Master Protein	Q13596	Sorting nexin-1 OS=Homo sapiens GN=SNX1 PE=1 SV=3	0	0	56	26	443	24	1	522	59	5.15	12594	472.91	24	18	2	5.37332e+08	6.07045e+08	5.9236e+08	8.1612e+08	8.57953e+08	8.26729e+08	6.83011e+08	6.99615e+08	6.53051e+08	Acetyl [N-Term]
High	High	None	Q58FF8	Putative heat shock protein HSP 90-beta 2 OS=Homo sapiens GN=HSP90AB2P PE=1 SV=2	0	0	22	11	515	6	1	381	44.3	4.84	13958	472.4	11	6	0	1.19438e+10	1.46113e+10	1.23266e+10	1.42096e+10	1.55867e+10	1.35456e+10	1.44947e+10	1.39779e+10	1.15162e+10
High	High	Master Protein	P62333	26S protease regulatory subunit 10B OS=Homo sapiens GN=PSMC6 PE=1 SV=1	0	0	61	23	515	23	1	389	44.1	7.49	12064	472.37	23	12	0	1.08149e+09	1.12381e+09	1025656550	1.35543e+09	1.42094e+09	1.30355e+09	1.29101e+09	1.30046e+09	1.25679e+09
High	High	Master Protein	Q86UK7	E3 ubiquitin-protein ligase ZNF598 OS=Homo sapiens GN=ZNF598 PE=1 SV=1	0	0	64	43	423	43	1	904	98.6	8.4	10808	472.04	43	20	0	2.26353e+08	2.22485e+08	2.20278e+08	3.33624e+08	3.17239e+08	3.3263e+08	1.81067e+08	1.8798e+08	1.89827e+08	Acetyl [N-Term]
High	High	Master Protein	Q8TBC4	NEDD8-activating enzyme E1 catalytic subunit OS=Homo sapiens GN=UBA3 PE=1 SV=2	0	0	64	23	387	23	1	463	51.8	5.45	9727	471.99	23	13	0	4.40863e+08	4.70119e+08	4.55365e+08	5.58706e+08	573504525	5.67442e+08	5.02949e+08	5.05949e+08	4.97594e+08	Acetyl [N-Term; N-Term]
High	High	Master Protein	P40925	Malate dehydrogenase, cytoplasmic OS=Homo sapiens GN=MDH1 PE=1 SV=4	0	0	42	14	435	14	1	334	36.4	7.36	10640	471.9	13	6	0	1.72391e+09	1.71524e+09	1.61423e+09	2.00507e+09	2.04092e+09	2.01618e+09	1.96965e+09	1.89678e+09	1.98446e+09
High	High	Master Protein	Q6IBS0	Twinfilin-2 OS=Homo sapiens GN=TWF2 PE=1 SV=2	0	0	61	19	281	16	1	349	39.5	6.84	6021	471.16	18	11	0	1.0301e+08	1.08953e+08	1.09965e+08	1.42186e+08	1.3957e+08	1.45308e+08	1.2528e+08	1.33775e+08	1.2251e+08	Acetyl [N-Term]
High	High	Master Protein	O60216	Double-strand-break repair protein rad21 homolog OS=Homo sapiens GN=RAD21 PE=1 SV=2	0	0	53	25	368	25	1	631	71.6	4.65	9944	470.85	24	16	0	2.75196e+08	2.88998e+08	2.28533e+08	2.78615e+08	2.61847e+08	2.01467e+08	2.5108e+08	1.99059e+08	2.30122e+08
High	High	Master Protein	O00507	Probable ubiquitin carboxyl-terminal hydrolase FAF-Y OS=Homo sapiens GN=USP9Y PE=2 SV=2	0	0	30	63	536	28	1	2555	290.9	5.86	12800	470.81	62	25	0	3.94135e+07	3.84304e+07	3.49489e+07	4.33996e+07	4.49853e+07	4.34003e+07	4.46096e+07	4.46315e+07	3.96086e+07
High	High	Master Protein	O00499	Myc box-dependent-interacting protein 1 OS=Homo sapiens GN=BIN1 PE=1 SV=1	0	0	46	20	302	19	1	593	64.7	5.06	5971	470.8	19	16	1	1.96962e+08	1.82658e+08	1.81363e+08	2.12689e+08	2.11705e+08	2.13192e+08	2.23488e+08	2.45535e+08	2.25351e+08
High	High	Master Protein	P43034	Platelet-activating factor acetylhydrolase IB subunit alpha OS=Homo sapiens GN=PAFAH1B1 PE=1 SV=2	0	0	68	27	448	26	1	410	46.6	7.37	10036	470.71	27	14	1	6.61899e+08	6.48526e+08	6.16798e+08	7.82364e+08	7.79694e+08	8.22841e+08	8.22132e+08	7.61342e+08	7.71987e+08
High	High	Master Protein	Q96EP5	DAZ-associated protein 1 OS=Homo sapiens GN=DAZAP1 PE=1 SV=1	0	0	41	15	372	15	1	407	43.4	8.56	9117	468.7	14	9	0	5.37434e+08	5.94581e+08	5.59916e+08	7.02916e+08	6.82518e+08	6.75553e+08	7.10245e+08	6.95561e+08	7.0755e+08	Acetyl [N-Term]
High	High	Master Protein	Q5JTH9	RRP12-like protein OS=Homo sapiens GN=RRP12 PE=1 SV=2	0	0	51	53	522	52	1	1297	143.6	8.75	10144	468.3	52	24	0	3.81433e+08	4.34381e+08	4.06429e+08	5.33963e+08	5.25979e+08	5.28426e+08	4.99533e+08	4.91419e+08	4.82964e+08
High	High	Master Protein	P33316	Deoxyuridine 5'-triphosphate nucleotidohydrolase, mitochondrial OS=Homo sapiens GN=DUT PE=1 SV=4	0	0	54	15	331	15	1	252	26.5	9.36	7357	467.86	15	9	0	5.22963e+08	553798419	4.97758e+08	5.09785e+08	5.22544e+08	4.79767e+08	3.55628e+08	3.37507e+08	3.07921e+08
High	High	Master Protein	Q96G03	Phosphoglucomutase-2 OS=Homo sapiens GN=PGM2 PE=1 SV=4	0	0	56	34	502	34	1	612	68.2	6.73	11420	466.91	34	17	0	6.72427e+08	6.90115e+08	6.18745e+08	831128411	8.03932e+08	7.98436e+08	7.54246e+08	7.46483e+08	7.15438e+08	Acetyl [N-Term]
High	High	Master Protein	Q9UGV2	Protein NDRG3 OS=Homo sapiens GN=NDRG3 PE=1 SV=2	0	0	68	18	331	18	1	375	41.4	5.31	8053	466.76	17	15	0	2.90915e+08	3.00051e+08	3.02074e+08	4.19446e+08	4.38726e+08	4.28388e+08	3.79879e+08	3.73525e+08	3.64738e+08	Acetyl [N-Term]
High	High	Master Protein	Q96ED9	Protein Hook homolog 2 OS=Homo sapiens GN=HOOK2 PE=1 SV=3	0	0	48	35	355	35	1	719	83.2	5.47	8334	466.67	35	18	0	1.85016e+08	1.96776e+08	1.82824e+08	2.72307e+08	2.88815e+08	2.70344e+08	2.54485e+08	2.44696e+08	2.68787e+08
High	High	Master Protein	Q07866	Kinesin light chain 1 OS=Homo sapiens GN=KLC1 PE=1 SV=2	0	0	66	39	505	27	1	573	65.3	6.2	12373	466.14	39	20	13	6.71925e+08	7.51873e+08	7.29181e+08	9.81927e+08	1.04961e+09	9.9464e+08	9.57739e+08	9.3884e+08	8.97251e+08
High	High	Master Protein	O60231	Putative pre-mRNA-splicing factor ATP-dependent RNA helicase DHX16 OS=Homo sapiens GN=DHX16 PE=1 SV=2	0	0	39	39	404	37	1	1041	119.2	6.8	8386	464.74	38	15	1	1.96892e+08	1.98162e+08	1.99646e+08	2.55088e+08	2.65264e+08	2.60086e+08	1.91899e+08	2.03186e+08	1.9945e+08
High	High	None	O14983	Sarcoplasmic/endoplasmic reticulum calcium ATPase 1 OS=Homo sapiens GN=ATP2A1 PE=1 SV=1	0	0	14	12	348	12	1	1001	110.2	5.16	8190	464.16	12	7	0	4.81543e+08	4.76728e+08	4.92568e+08	5.85105e+08	6.459e+08	6.16936e+08	5.83784e+08	5.784e+08	565295750
High	High	Master Protein	Q9UIA9	Exportin-7 OS=Homo sapiens GN=XPO7 PE=1 SV=3	0	0	51	48	513	48	1	1087	123.8	6.32	13348	463.99	48	18	0	5.84292e+08	5.82093e+08	5.84666e+08	6.36636e+08	6.73038e+08	6.7494e+08	6.33389e+08	6.67715e+08	6.23548e+08	Acetyl [N-Term]
High	High	Master Protein	Q53EL6	Programmed cell death protein 4 OS=Homo sapiens GN=PDCD4 PE=1 SV=2	0	0	65	23	383	23	1	469	51.7	5.21	10685	463.53	23	13	0	4.03285e+08	4.10386e+08	4.19816e+08	4.69501e+08	5.10517e+08	4.93616e+08	4.69428e+08	4.96771e+08	4.82398e+08
High	High	Master Protein	P11177	Pyruvate dehydrogenase E1 component subunit beta, mitochondrial OS=Homo sapiens GN=PDHB PE=1 SV=3	0	0	61	15	341	15	1	359	39.2	6.65	7447	463.4	14	10	0	4.15467e+08	417765226	4.03693e+08	5.43379e+08	5.4037e+08	5.52257e+08	4.74512e+08	4.7705e+08	4.41285e+08
High	High	Master Protein	Q16181	Septin-7 OS=Homo sapiens GN=SEPT7 PE=1 SV=2	0	0	56	24	486	22	1	437	50.6	8.63	11093	463.39	24	12	0	8.02603e+08	8.05679e+08	7.88897e+08	1.04646e+09	1.05499e+09	1.02295e+09	8.68999e+08	9.57713e+08	9.69684e+08
High	High	Master Protein	O14964	Hepatocyte growth factor-regulated tyrosine kinase substrate OS=Homo sapiens GN=HGS PE=1 SV=1	0	0	32	24	298	24	1	777	86.1	6.16	6682	462.85	24	10	0	2.79824e+08	2.95708e+08	2.91075e+08	3.77735e+08	3.62669e+08	3.73349e+08	3.48337e+08	3.39832e+08	3.54985e+08
High	High	Master Protein	Q8NI36	WD repeat-containing protein 36 OS=Homo sapiens GN=WDR36 PE=1 SV=1	0	0	43	34	403	34	1	951	105.3	7.53	9081	462.15	34	15	0	3.06335e+08	3.14387e+08	3.10887e+08	3.60656e+08	3.52923e+08	3.46047e+08	3.30262e+08	3.29729e+08	3.07051e+08
High	High	Master Protein	Q15428	Splicing factor 3A subunit 2 OS=Homo sapiens GN=SF3A2 PE=1 SV=2	0	0	37	16	364	16	1	464	49.2	9.64	8539	462.02	16	6	0	5.65157e+08	5.81646e+08	5.34332e+08	7.42716e+08	7.40345e+08	7.32719e+08	6.15341e+08	5.96634e+08	6.07541e+08	Acetyl [N-Term]
High	High	Master Protein	Q13033	Striatin-3 OS=Homo sapiens GN=STRN3 PE=1 SV=3	0	0	36	22	316	19	1	797	87.2	5.36	7384	461.86	21	16	3	1.99694e+08	2.00721e+08	2.00565e+08	2.57762e+08	2.68051e+08	2.47986e+08	1.81398e+08	1.75727e+08	1.93626e+08	Acetyl [N-Term]
High	High	Master Protein	Q9UBE0	SUMO-activating enzyme subunit 1 OS=Homo sapiens GN=SAE1 PE=1 SV=1	0	0	64	16	346	16	1	346	38.4	5.3	8376	461.84	16	9	0	3.02055e+08	3.2925e+08	3.08547e+08	3.88045e+08	4.10822e+08	3.95014e+08	3.3023e+08	3.3101e+08	3.21588e+08
High	High	Master Protein	O75400	Pre-mRNA-processing factor 40 homolog A OS=Homo sapiens GN=PRPF40A PE=1 SV=2	0	0	37	33	380	31	1	957	108.7	7.56	7989	461.8	33	15	2	4.91009e+08	4.75991e+08	4.64327e+08	6.19687e+08	6.21149e+08	6.36496e+08	5.51472e+08	5.48802e+08	5.5355e+08	Acetyl [N-Term]
High	High	Master Protein	Q92747	Actin-related protein 2/3 complex subunit 1A OS=Homo sapiens GN=ARPC1A PE=1 SV=2	0	0	69	23	421	21	1	370	41.5	8.18	10315	461.68	23	12	2	6.1941e+08	6.68778e+08	6.18084e+08	7.9763e+08	8.57166e+08	8.0833e+08	7.42018e+08	7.58829e+08	7.59837e+08	Acetyl [N-Term]
High	High	Master Protein	Q96CS3	FAS-associated factor 2 OS=Homo sapiens GN=FAF2 PE=1 SV=2	0	0	53	21	351	21	1	445	52.6	5.62	7654	461.58	21	14	0	2.27811e+08	2.37238e+08	2.24751e+08	3.37759e+08	3.28443e+08	326589959	3.53519e+08	3.33531e+08	3.41431e+08	Acetyl [N-Term]
High	High	Master Protein	Q9NUU7	ATP-dependent RNA helicase DDX19A OS=Homo sapiens GN=DDX19A PE=1 SV=1	0	0	66	30	477	6	1	478	53.9	6.58	11154	461.3	30	14	26	5.84989e+08	5.94708e+08	5.46867e+08	7.50189e+08	7.68272e+08	7.21255e+08	7.55171e+08	7.62669e+08	6.96079e+08	Acetyl [N-Term]
High	High	Master Protein	Q9NWH9	SAFB-like transcription modulator OS=Homo sapiens GN=SLTM PE=1 SV=2	0	0	46	49	527	49	1	1034	117.1	7.87	13745	460.94	48	18	0	2.77033e+08	2.79849e+08	2.50949e+08	3.35529e+08	3.53818e+08	3.43016e+08	3.36919e+08	3.20659e+08	3.335e+08	Acetyl [N-Term; N-Term]
High	High	Master Protein	P62873	Guanine nucleotide-binding protein G(I)/G(S)/G(T) subunit beta-1 OS=Homo sapiens GN=GNB1 PE=1 SV=3	0	0	69	16	360	9	1	340	37.4	6	7973	460.39	16	8	8	614470617	5.75319e+08	5.62034e+08	8.00759e+08	7.72748e+08	7.73584e+08	5.6037e+08	5.25153e+08	5.73513e+08	Acetyl [N-Term]
High	High	Master Protein	O94964	Protein SOGA1 OS=Homo sapiens GN=SOGA1 PE=1 SV=2	0	0	55	62	489	60	1	1423	159.7	6.46	12531	460.3	62	30	2	1.82939e+08	1.85183e+08	1.82223e+08	2.19443e+08	2.17931e+08	2.10928e+08	2.04301e+08	2.04199e+08	2.06156e+08
High	High	Master Protein	P43487	Ran-specific GTPase-activating protein OS=Homo sapiens GN=RANBP1 PE=1 SV=1	0	0	74	14	334	14	1	201	23.3	5.29	6837	460.07	14	7	0	1.36456e+09	1.29567e+09	1.16739e+09	1.56765e+09	1.59643e+09	1.6424e+09	1.51297e+09	1470074138	1.43166e+09
High	High	Master Protein	O14979	Heterogeneous nuclear ribonucleoprotein D-like OS=Homo sapiens GN=HNRNPDL PE=1 SV=3	0	0	40	16	420	14	1	420	46.4	9.57	9086	459.98	16	11	0	6.89329e+08	6.35781e+08	6.80194e+08	8.51723e+08	8.76576e+08	9.02165e+08	8.24547e+08	9.91814e+08	9.2303e+08
High	High	Master Protein	Q13136	Liprin-alpha-1 OS=Homo sapiens GN=PPFIA1 PE=1 SV=1	0	0	46	48	487	32	1	1202	135.7	6.29	11501	459.92	48	22	16	2.46276e+08	2.4565e+08	2.36052e+08	3.08537e+08	3.15719e+08	3.23268e+08	2.70129e+08	2.82197e+08	2.68987e+08
High	High	Master Protein	Q92805	Golgin subfamily A member 1 OS=Homo sapiens GN=GOLGA1 PE=1 SV=3	0	0	52	31	360	31	1	767	88.1	5.27	8425	459.66	30	19	0	1.42086e+08	1.38658e+08	1.36634e+08	1.56117e+08	1.52717e+08	1.55326e+08	1.67619e+08	1.62672e+08	1.55978e+08
High	High	Master Protein	Q14151	Scaffold attachment factor B2 OS=Homo sapiens GN=SAFB2 PE=1 SV=1	0	0	47	42	497	27	1	953	107.4	6.16	11783	459.53	42	17	0	1.05633e+08	9.39173e+07	9.4872e+07	1.09658e+08	1.29208e+08	1.20951e+08	9.64856e+07	9.17006e+07	9.12579e+07	Acetyl [N-Term]
High	High	Master Protein	Q96R06	Sperm-associated antigen 5 OS=Homo sapiens GN=SPAG5 PE=1 SV=2	0	0	49	43	400	43	1	1193	134.3	5	9226	458.99	43	24	0	2.09061e+08	2.36162e+08	2.0918e+08	2.57845e+08	2.59125e+08	2.43577e+08	2.11674e+08	2.12471e+08	2.15298e+08
High	High	Master Protein	Q8NCW5	NAD(P)H-hydrate epimerase OS=Homo sapiens GN=NAXE PE=1 SV=2	0	0	53	14	294	14	1	288	31.7	7.66	5818	458.5	14	11	0	6.44281e+08	5.56882e+08	5.70857e+08	7.78656e+08	7.70215e+08	7.42106e+08	6.52595e+08	6.70736e+08	6.95827e+08
High	High	Master Protein	Q03154	Aminoacylase-1 OS=Homo sapiens GN=ACY1 PE=1 SV=1	0	0	68	21	361	21	1	408	45.9	6.18	7505	458.03	21	11	0	5.66921e+08	5.86908e+08	5.70805e+08	8.3043e+08	8.33961e+08	8.63214e+08	7.57266e+08	749371778	7.43949e+08
High	High	Master Protein	Q5UIP0	Telomere-associated protein RIF1 OS=Homo sapiens GN=RIF1 PE=1 SV=2	0	0	28	54	394	54	1	2472	274.3	5.52	8398	457.66	53	30	0	9.70185e+07	1.0332e+08	9.98003e+07	1.11722e+08	1.08641e+08	1.02923e+08	7.54437e+07	7.31708e+07	6.87839e+07
High	High	Master Protein	P62753	40S ribosomal protein S6 OS=Homo sapiens GN=RPS6 PE=1 SV=1	0	0	37	11	359	11	1	249	28.7	10.84	8190	457.48	11	4	0	2.1232e+09	1.98431e+09	1.94903e+09	3.22064e+09	3.02313e+09	2.88283e+09	3.17205e+09	3.20568e+09	3.28942e+09
High	High	Master Protein	Q15042	Rab3 GTPase-activating protein catalytic subunit OS=Homo sapiens GN=RAB3GAP1 PE=1 SV=3	0	0	48	40	394	40	1	981	110.5	5.55	8506	457.29	39	20	0	1.9871e+08	1.97333e+08	1.89492e+08	2.66472e+08	2.63714e+08	2.62679e+08	2.659e+08	2.5581e+08	2.51278e+08
High	High	Master Protein	Q96HC4	PDZ and LIM domain protein 5 OS=Homo sapiens GN=PDLIM5 PE=1 SV=5	0	0	57	29	434	29	1	596	63.9	8.21	11155	457.02	28	17	0	3.5213e+08	3.63786e+08	3.44786e+08	4.83468e+08	5.08993e+08	4.92992e+08	4.63112e+08	4.85633e+08	4.57693e+08	Acetyl [N-Term]
High	High	Master Protein	Q6UWE0	E3 ubiquitin-protein ligase LRSAM1 OS=Homo sapiens GN=LRSAM1 PE=1 SV=1	0	0	62	35	385	34	1	723	83.5	5.94	9485	456.49	35	21	1	2.06624e+08	2.17825e+08	2.07713e+08	2.85123e+08	2.86579e+08	2.66616e+08	2.45589e+08	2.36222e+08	2.29758e+08
High	High	Master Protein	P61289	Proteasome activator complex subunit 3 OS=Homo sapiens GN=PSME3 PE=1 SV=1	0	0	70	18	375	18	1	254	29.5	5.95	9208	456.47	18	10	0	9.48978e+08	9.49843e+08	9.31214e+08	1.02846e+09	1.02416e+09	1.04177e+09	1001770386	9.70408e+08	8.86637e+08
High	High	Master Protein	O96019	Actin-like protein 6A OS=Homo sapiens GN=ACTL6A PE=1 SV=1	0	0	57	17	300	17	1	429	47.4	5.6	6541	456.22	16	13	0	443087041	390656234	3.55074e+08	4.25699e+08	4.40565e+08	4.17652e+08	3.74584e+08	3.46692e+08	3.54774e+08
High	High	Master Protein	Q6PD62	RNA polymerase-associated protein CTR9 homolog OS=Homo sapiens GN=CTR9 PE=1 SV=1	0	0	38	32	368	32	1	1173	133.4	6.77	7920	456.15	32	18	0	2.5512e+08	2.61719e+08	2.48747e+08	3.03021e+08	3.10038e+08	3.03998e+08	2.33701e+08	2.31717e+08	2.24832e+08
High	High	Master Protein	Q14684	Ribosomal RNA processing protein 1 homolog B OS=Homo sapiens GN=RRP1B PE=1 SV=3	0	0	58	33	346	33	1	758	84.4	9.76	7333	456.03	33	13	0	1.94781e+08	1.9481e+08	1.99443e+08	2.41738e+08	2.56824e+08	2.54623e+08	1.98727e+08	2.08889e+08	2.06831e+08
High	High	Master Protein	Q15907	Ras-related protein Rab-11B OS=Homo sapiens GN=RAB11B PE=1 SV=4	0	0	63	14	358	2	1	218	24.5	5.94	8052	455.56	14	6	13	1.31372e+09	1.39609e+09	1.40764e+09	1.63803e+09	1.6519e+09	1.7015e+09	1.68926e+09	1.58853e+09	1.56184e+09	Acetyl [N-Term]
High	High	Master Protein	Q12789	General transcription factor 3C polypeptide 1 OS=Homo sapiens GN=GTF3C1 PE=1 SV=4	0	0	38	61	422	61	1	2109	238.7	7.3	9993	455.26	60	25	0	1.65304e+08	1.62023e+08	1.5611e+08	1.98376e+08	2.04947e+08	1.98546e+08	1.61531e+08	1.65931e+08	1.57523e+08
High	High	Master Protein	Q9Y6D9	Mitotic spindle assembly checkpoint protein MAD1 OS=Homo sapiens GN=MAD1L1 PE=1 SV=2	0	0	54	37	364	37	1	718	83	5.92	8340	455.21	36	19	0	2.06606e+08	2.24362e+08	1.97287e+08	2.43671e+08	2.5522e+08	2.54744e+08	2.15374e+08	2.07473e+08	2.05796e+08
High	High	Master Protein	Q9H307	Pinin OS=Homo sapiens GN=PNN PE=1 SV=4	0	0	51	40	546	39	1	717	81.6	7.14	12849	454.89	40	18	0	7.02283e+08	7.88784e+08	7.61979e+08	8.34913e+08	9.07157e+08	9.05588e+08	7.34665e+08	8.23194e+08	7.58415e+08
High	High	Master Protein	Q14165	Malectin OS=Homo sapiens GN=MLEC PE=1 SV=1	0	0	49	15	327	15	1	292	32.2	5.41	9298	454.63	15	9	0	2.17184e+08	2.46706e+08	2.36635e+08	3.27633e+08	3.24979e+08	3.15507e+08	1.97076e+08	1.79808e+08	1.83093e+08
High	High	Master Protein	O95793	Double-stranded RNA-binding protein Staufen homolog 1 OS=Homo sapiens GN=STAU1 PE=1 SV=2	0	0	65	34	474	32	1	577	63.1	9.44	12191	454.54	34	17	2	4.9228e+08	5.11746e+08	4.70064e+08	5.86772e+08	5.97262e+08	5.82864e+08	4.90021e+08	4.81673e+08	4.71507e+08	Acetyl [N-Term]
High	High	Master Protein	Q9NRY5	Protein FAM114A2 OS=Homo sapiens GN=FAM114A2 PE=1 SV=4	0	0	76	34	424	34	1	505	55.4	4.88	10845	454.06	34	20	0	3.07539e+08	3.00419e+08	3.03275e+08	4.50062e+08	4.45457e+08	4.35213e+08	3.49513e+08	3.62658e+08	3.60977e+08	Acetyl [N-Term]
High	High	Master Protein Candidate	P63162	Small nuclear ribonucleoprotein-associated protein N OS=Homo sapiens GN=SNRPN PE=1 SV=1	0	0	25	8	391	8	1	240	24.6	11.19	8340	453.37	8	2	0	1.30079e+09	1.39963e+09	1.291e+09	1.58186e+09	1.60785e+09	1.58044e+09	1.37594e+09	1.40983e+09	1.31627e+09
High	High	Master Protein	P14678	Small nuclear ribonucleoprotein-associated proteins B and B' OS=Homo sapiens GN=SNRPB PE=1 SV=2	0	0	25	8	391	8	1	240	24.6	11.19	8340	453.37	8	2	0	1.30079e+09	1.39963e+09	1.291e+09	1.58186e+09	1.60785e+09	1.58044e+09	1.37594e+09	1.40983e+09	1.31627e+09
High	High	Master Protein	Q9UJU6	Drebrin-like protein OS=Homo sapiens GN=DBNL PE=1 SV=1	0	0	60	26	449	26	1	430	48.2	5.05	10569	453.18	26	12	0	6.16913e+08	6.20615e+08	5.92326e+08	8.20364e+08	8.41632e+08	8.84429e+08	7.22627e+08	7.93466e+08	7.48403e+08
High	High	Master Protein	Q9H3S7	Tyrosine-protein phosphatase non-receptor type 23 OS=Homo sapiens GN=PTPN23 PE=1 SV=1	0	0	34	43	394	43	1	1636	178.9	6.92	8621	453.15	43	19	0	1.84877e+08	1.87789e+08	1.94773e+08	2.51219e+08	2.68318e+08	2.72651e+08	2.47695e+08	2.57504e+08	2.31349e+08
High	High	Master Protein	Q9UPN4	Centrosomal protein of 131 kDa OS=Homo sapiens GN=CEP131 PE=1 SV=3	0	0	56	54	421	54	1	1083	122.1	8.69	10762	452.98	54	27	0	1.56666e+08	1.5147e+08	1.53724e+08	1.89539e+08	1.80505e+08	1.86555e+08	1.69766e+08	1.66278e+08	1.68033e+08
High	High	Master Protein	P17174	Aspartate aminotransferase, cytoplasmic OS=Homo sapiens GN=GOT1 PE=1 SV=3	0	0	62	21	364	21	1	413	46.2	7.01	8492	452.96	21	11	0	1.61118e+09	1.54275e+09	1.51191e+09	1813183055	1.85457e+09	1.86848e+09	1.63553e+09	1.73163e+09	1.71964e+09
High	High	Master Protein	Q13148	TAR DNA-binding protein 43 OS=Homo sapiens GN=TARDBP PE=1 SV=1	0	0	57	17	363	17	1	414	44.7	6.19	9564	452.59	17	12	0	8.2583e+08	7.91754e+08	8.2678e+08	1.02869e+09	1.02318e+09	1.02061e+09	8.99925e+08	8.87241e+08	8.31803e+08
High	High	Master Protein	Q6L8Q7	2',5'-phosphodiesterase 12 OS=Homo sapiens GN=PDE12 PE=1 SV=2	0	0	49	23	333	23	1	609	67.3	6.57	8300	452.23	23	12	0	2.40399e+08	2.69977e+08	2.64712e+08	3.06888e+08	3.23881e+08	3.40585e+08	3.07282e+08	3.22318e+08	3.01078e+08
High	High	Master Protein	Q15276	Rab GTPase-binding effector protein 1 OS=Homo sapiens GN=RABEP1 PE=1 SV=2	0	0	57	44	391	44	1	862	99.2	5.01	8897	452.21	44	23	0	1.33629e+08	1.45248e+08	1.42345e+08	1.98231e+08	1.99884e+08	1.92748e+08	2.00262e+08	2.04063e+08	1.91511e+08	Acetyl [N-Term]
High	High	Master Protein	Q08379	Golgin subfamily A member 2 OS=Homo sapiens GN=GOLGA2 PE=1 SV=3	0	0	63	44	402	44	1	1002	113	5.02	10055	452.07	44	26	0	1.49924e+08	1.63583e+08	1.44856e+08	2.07184e+08	2.16936e+08	2.15117e+08	1.93582e+08	2.02337e+08	1.90825e+08
High	High	Master Protein	Q9BUQ8	Probable ATP-dependent RNA helicase DDX23 OS=Homo sapiens GN=DDX23 PE=1 SV=3	0	0	49	43	457	43	1	820	95.5	9.55	10534	451.67	42	19	0	4.49123e+08	4.43611e+08	4.2597e+08	5.51477e+08	5.6432e+08	5.51886e+08	5.14781e+08	5.08372e+08	5.00811e+08	Acetyl [N-Term]
High	High	Master Protein	Q9UQB8	Brain-specific angiogenesis inhibitor 1-associated protein 2 OS=Homo sapiens GN=BAIAP2 PE=1 SV=1	0	0	72	36	472	36	1	552	60.8	8.9	10751	451.55	36	13	0	4.41928e+08	4.37287e+08	4.36434e+08	7.24131e+08	6.87583e+08	6.75642e+08	6.20043e+08	6.06412e+08	5.87331e+08
High	High	Master Protein	Q5T5P2	Sickle tail protein homolog OS=Homo sapiens GN=KIAA1217 PE=1 SV=2	0	0	37	58	428	58	1	1943	214	7.06	9786	450.76	55	27	0	1.31179e+08	1.33692e+08	1.2937e+08	1.662e+08	1.726e+08	1.80482e+08	1.5487e+08	1.60536e+08	1.58775e+08
High	High	Master Protein	P49720	Proteasome subunit beta type-3 OS=Homo sapiens GN=PSMB3 PE=1 SV=2	0	0	58	12	355	12	1	205	22.9	6.55	9339	450.56	12	7	0	4.20552e+08	4.33674e+08	4.16237e+08	4.66973e+08	4.40882e+08	4.78146e+08	4.86483e+08	4.85793e+08	4.60631e+08	Acetyl [N-Term]
High	High	Master Protein	P11182	Lipoamide acyltransferase component of branched-chain alpha-keto acid dehydrogenase complex, mitochondrial OS=Homo sapiens GN=DBT PE=1 SV=3	0	0	70	27	417	27	1	482	53.5	8.51	9472	450.28	26	15	0	5.03979e+08	5.35748e+08	5.02166e+08	5.66289e+08	6.14311e+08	5.60203e+08	6.11044e+08	6.04165e+08	6.03197e+08
High	High	Master Protein	Q13501	Sequestosome-1 OS=Homo sapiens GN=SQSTM1 PE=1 SV=1	0	0	61	18	324	18	1	440	47.7	5.22	8854	450.14	18	11	0	2.31345e+08	2.32751e+08	2.21207e+08	3.27039e+08	2.89765e+08	3.3284e+08	2.71675e+08	2.65178e+08	2.68841e+08
High	High	Master Protein	Q12907	Vesicular integral-membrane protein VIP36 OS=Homo sapiens GN=LMAN2 PE=1 SV=1	0	0	60	18	324	18	1	356	40.2	6.95	6874	449.97	18	8	0	6.93411e+08	8.16317e+08	7.52963e+08	7.95723e+08	7.29503e+08	7.32118e+08	7.25919e+08	7.2613e+08	7.40235e+08
High	High	Master Protein	O43865	Adenosylhomocysteinase 2 OS=Homo sapiens GN=AHCYL1 PE=1 SV=2	0	0	58	28	475	16	1	530	58.9	6.89	10456	449.9	28	12	12	6.08209e+08	6.26598e+08	6.03307e+08	8.08116e+08	7.721e+08	7.39445e+08	7.48315e+08	7.49235e+08	7.15989e+08	Acetyl [N-Term]
High	High	Master Protein	Q14137	Ribosome biogenesis protein BOP1 OS=Homo sapiens GN=BOP1 PE=1 SV=2	0	0	59	34	324	34	1	746	83.6	6.19	7034	448.96	34	18	0	2.70148e+08	2.7161e+08	2.68069e+08	3.77363e+08	3.89116e+08	3.73076e+08	3.6413e+08	3.57558e+08	3.68605e+08
High	High	Master Protein	P34896	Serine hydroxymethyltransferase, cytosolic OS=Homo sapiens GN=SHMT1 PE=1 SV=1	0	0	64	23	423	21	1	483	53	7.71	9981	448.87	23	13	0	7.01129e+08	5.8732e+08	6.15553e+08	7.59039e+08	757324470	7.74015e+08	6.22717e+08	6.25875e+08	6.55358e+08
High	High	Master Protein	Q15785	Mitochondrial import receptor subunit TOM34 OS=Homo sapiens GN=TOMM34 PE=1 SV=2	0	0	71	21	362	21	1	309	34.5	8.98	9976	448.69	21	8	0	3.67669e+08	3.69054e+08	3.64203e+08	5.21904e+08	5.27903e+08	5.10966e+08	4.8622e+08	4.90799e+08	4.66735e+08
High	High	Master Protein	Q9UMR2	ATP-dependent RNA helicase DDX19B OS=Homo sapiens GN=DDX19B PE=1 SV=1	0	0	64	27	442	3	1	479	53.9	6.3	10508	448.34	27	13	0	9.11223e+06	1.17242e+07	1.03943e+07	1.27932e+07	1.39461e+07	1.33672e+07	1.42205e+07	1.32042e+07	1.32615e+07	Acetyl [N-Term]
High	High	Master Protein	Q9UGP4	LIM domain-containing protein 1 OS=Homo sapiens GN=LIMD1 PE=1 SV=1	0	0	68	29	320	29	1	676	72.1	6.65	7121	447.65	29	20	0	1.14891e+08	1.18714e+08	1.14515e+08	1.71482e+08	1.5264e+08	1.5367e+08	1.38554e+08	1.34271e+08	1.36639e+08	Acetyl [N-Term]
High	High	Master Protein	O75116	Rho-associated protein kinase 2 OS=Homo sapiens GN=ROCK2 PE=1 SV=4	0	0	48	58	416	51	1	1388	160.8	6.02	8337	447.38	58	26	0	1.81289e+08	1.71733e+08	1.69133e+08	1.92802e+08	1.89676e+08	1.86121e+08	1.87962e+08	1.94557e+08	1.80739e+08	Acetyl [N-Term]
High	High	Master Protein	Q96IZ0	PRKC apoptosis WT1 regulator protein OS=Homo sapiens GN=PAWR PE=1 SV=1	0	0	57	15	296	14	1	340	36.5	5.41	6342	447.07	14	12	1	1.33542e+08	1.26043e+08	1.25154e+08	1.87498e+08	1.77565e+08	1.89429e+08	1.78284e+08	1.61752e+08	1.68049e+08
High	High	Master Protein	P28482	Mitogen-activated protein kinase 1 OS=Homo sapiens GN=MAPK1 PE=1 SV=3	0	0	64	19	426	12	1	360	41.4	6.98	9704	447.01	19	9	0	3.97147e+08	4.44266e+08	4.36804e+08	5.16142e+08	5.24817e+08	496365451	4.0045e+08	3.99849e+08	4.17821e+08	Acetyl [N-Term]
High	High	Master Protein	Q8TAT6	Nuclear protein localization protein 4 homolog OS=Homo sapiens GN=NPLOC4 PE=1 SV=3	0	0	60	30	381	30	1	608	68.1	6.38	7979	446.98	30	18	0	4.14862e+08	4.05993e+08	3.95911e+08	5.11723e+08	5.12657e+08	4.98675e+08	4.89196e+08	4.89818e+08	4.71175e+08	Acetyl [N-Term]
High	High	Master Protein	Q9Y4E6	WD repeat-containing protein 7 OS=Homo sapiens GN=WDR7 PE=1 SV=2	0	0	37	38	339	38	1	1490	163.7	6.92	7078	446.86	36	19	0	7.25096e+07	7.8126e+07	6.96047e+07	9.97413e+07	1.0294e+08	1.07371e+08	9.96562e+07	9.86146e+07	9.74167e+07
High	High	Master Protein	P36957	Dihydrolipoyllysine-residue succinyltransferase component of 2-oxoglutarate dehydrogenase complex, mitochondrial OS=Homo sapiens GN=DLST PE=1 SV=4	0	0	48	19	357	19	1	453	48.7	8.95	8066	446.74	18	11	0	3.30073e+08	3.62729e+08	3.30539e+08	4.44407e+08	4.36957e+08	4.50461e+08	3.36204e+08	3.58385e+08	3.43051e+08
High	High	Master Protein	P62314	Small nuclear ribonucleoprotein Sm D1 OS=Homo sapiens GN=SNRPD1 PE=1 SV=1	0	0	38	4	238	4	1	119	13.3	11.56	5223	446.64	4	4	0	3.82278e+08	4.11996e+08	3.60658e+08	5.93519e+08	5.10273e+08	5.41578e+08	4.8808e+08	4.57913e+08	4.90424e+08
High	High	Master Protein	Q8N6T3	ADP-ribosylation factor GTPase-activating protein 1 OS=Homo sapiens GN=ARFGAP1 PE=1 SV=2	0	0	66	19	322	19	1	406	44.6	5.66	8436	446.29	19	12	0	1.63736e+08	1.88993e+08	1.63521e+08	2.32973e+08	2.40025e+08	2.24702e+08	2.3722e+08	2.26438e+08	2.40615e+08
High	High	Master Protein	Q8IWE2	Protein NOXP20 OS=Homo sapiens GN=FAM114A1 PE=1 SV=2	0	0	63	24	346	24	1	563	60.7	4.68	9019	445.85	24	12	0	1.63741e+08	1.66316e+08	1.56925e+08	2.32934e+08	2.17781e+08	2.22295e+08	1.76673e+08	167464745	1.75038e+08	Acetyl [N-Term]
High	High	Master Protein Rejected	Q7Z3J3	RanBP2-like and GRIP domain-containing protein 4 OS=Homo sapiens GN=RGPD4 PE=2 SV=3	0	0	33	50	539	0	0	1758	197.2	6.27	13496	445.42	50	23	0
High	High	Master Protein	Q9Y394	Dehydrogenase/reductase SDR family member 7 OS=Homo sapiens GN=DHRS7 PE=1 SV=1	0	0	50	14	385	14	1	339	38.3	8.32	9278	444.97	14	8	0	9.57993e+08	9.24399e+08	8.53547e+08	1.04938e+09	1.0994e+09	1.07187e+09	3.54456e+08	3.34368e+08	3.71523e+08
High	High	Master Protein	Q09161	Nuclear cap-binding protein subunit 1 OS=Homo sapiens GN=NCBP1 PE=1 SV=1	0	0	54	33	497	33	1	790	91.8	6.43	11595	444.85	33	18	0	3.96804e+08	4.28029e+08	4.07079e+08	4.60838e+08	4.62067e+08	4.65561e+08	4.28221e+08	4.35301e+08	4.38816e+08
High	High	Master Protein	Q12972	Nuclear inhibitor of protein phosphatase 1 OS=Homo sapiens GN=PPP1R8 PE=1 SV=2	0	0	62	19	321	19	1	351	38.5	7.37	6735	444.74	18	10	0	2.17064e+08	2.23822e+08	2.27843e+08	2.40996e+08	2.55674e+08	262348884	2.3981e+08	2.32732e+08	2.26299e+08	Acetyl [N-Term]
High	High	Master Protein	Q9NXC5	WD repeat-containing protein mio OS=Homo sapiens GN=MIOS PE=1 SV=2	0	0	59	37	355	37	1	875	98.5	6.73	8195	444.49	37	21	0	1.14333e+08	1.14367e+08	1.05271e+08	1.47291e+08	1.56559e+08	1.55437e+08	1.39789e+08	1.4452e+08	1.39555e+08	Acetyl [N-Term]
High	High	Master Protein	Q86U86	Protein polybromo-1 OS=Homo sapiens GN=PBRM1 PE=1 SV=1	0	0	41	56	465	56	1	1689	192.8	6.89	9945	443.89	56	22	0	3.08499e+08	3.2346e+08	3.20302e+08	4.09693e+08	4.2503e+08	4.14415e+08	3.35417e+08	3.52818e+08	3.425e+08
High	High	Master Protein	P09417	Dihydropteridine reductase OS=Homo sapiens GN=QDPR PE=1 SV=2	0	0	65	14	300	14	1	244	25.8	7.37	6294	443.88	14	9	0	2.51704e+08	2.59877e+08	2.49221e+08	3.44157e+08	3.33297e+08	3.19905e+08	2.81302e+08	2.69886e+08	2.60482e+08	Acetyl [N-Term; N-Term]
High	High	Master Protein	Q8IX01	SURP and G-patch domain-containing protein 2 OS=Homo sapiens GN=SUGP2 PE=1 SV=2	0	0	61	56	449	56	1	1082	120.1	7.28	9776	443.43	56	24	0	2.57802e+08	2.48885e+08	2.52673e+08	3.06969e+08	303652775	2.96525e+08	2.70178e+08	2.61732e+08	2.59244e+08
High	High	Master Protein	Q9NNW7	Thioredoxin reductase 2, mitochondrial OS=Homo sapiens GN=TXNRD2 PE=1 SV=3	0	0	51	20	339	19	1	524	56.5	7.5	8200	443.4	20	16	0	2.681e+08	2.32595e+08	2.2692e+08	3.58641e+08	3.39865e+08	3.44693e+08	3.11583e+08	3.35847e+08	3.08984e+08
High	High	Master Protein	Q96CW1	AP-2 complex subunit mu OS=Homo sapiens GN=AP2M1 PE=1 SV=2	0	0	55	23	349	23	1	435	49.6	9.54	7596	443.24	23	10	0	4.4968e+08	4.80995e+08	4.5104e+08	6.82169e+08	6.80419e+08	6.75692e+08	6.69051e+08	6.66704e+08	6.86736e+08
High	High	Master Protein	Q9Y4A5	Transformation/transcription domain-associated protein OS=Homo sapiens GN=TRRAP PE=1 SV=3	0	0	30	87	442	87	1	3859	437.3	8.19	9771	443.23	82	34	0	1.32049e+08	1.38034e+08	1.35169e+08	1.54824e+08	1.72277e+08	1.76165e+08	1.70595e+08	1.73989e+08	1.66393e+08
High	High	Master Protein	Q15369	Elongin-C OS=Homo sapiens GN=ELOC PE=1 SV=1	0	0	66	7	312	7	1	112	12.5	4.78	9497	442.51	7	4	0	6.99331e+08	8.01298e+08	6.41722e+08	8.64392e+08	9.22608e+08	9.02369e+08	9.71991e+08	8.7024e+08	9.3143e+08
High	High	Master Protein	Q8N3U4	Cohesin subunit SA-2 OS=Homo sapiens GN=STAG2 PE=1 SV=3	0	0	41	45	442	36	1	1231	141.2	5.43	10044	442.32	45	23	10	4.13069e+08	4.19937e+08	4.08516e+08	5.10096e+08	5.01236e+08	4.70591e+08	4.44504e+08	4.63532e+08	4.50602e+08
High	High	Master Protein	O95155	Ubiquitin conjugation factor E4 B OS=Homo sapiens GN=UBE4B PE=1 SV=1	0	0	40	37	350	37	1	1302	146.1	6.55	7897	442.06	36	20	0	1.35968e+08	1.42706e+08	1.35044e+08	1.90395e+08	1.83199e+08	1.81058e+08	1.4464e+08	1.45473e+08	1.49065e+08	Acetyl [N-Term]
High	High	Master Protein	O95239	Chromosome-associated kinesin KIF4A OS=Homo sapiens GN=KIF4A PE=1 SV=3	0	0	47	49	460	30	1	1232	139.8	6.27	11246	441.75	49	24	19	2.08066e+08	2.09795e+08	2.01767e+08	2.32309e+08	2.28729e+08	2.3362e+08	1.39134e+08	1.47394e+08	1.45894e+08
High	High	Master Protein	Q9H1E3	Nuclear ubiquitous casein and cyclin-dependent kinase substrate 1 OS=Homo sapiens GN=NUCKS1 PE=1 SV=1	0	0	42	14	398	14	1	243	27.3	5.08	10965	441.72	14	6	0	4.23915e+08	4.39981e+08	4.20826e+08	5.05223e+08	5.19339e+08	4.90061e+08	5.33944e+08	5.37135e+08	5.19828e+08
High	High	Master Protein	O94760	N(G),N(G)-dimethylarginine dimethylaminohydrolase 1 OS=Homo sapiens GN=DDAH1 PE=1 SV=3	0	0	70	18	417	17	1	285	31.1	5.81	9977	441.46	18	10	1	5.70139e+08	5.90727e+08	6.10603e+08	7.27018e+08	7.90166e+08	7.83164e+08	5.37888e+08	5.75538e+08	5.6555e+08	Acetyl [N-Term]
High	High	Master Protein	Q9NZT2	Opioid growth factor receptor OS=Homo sapiens GN=OGFR PE=1 SV=3	0	0	50	23	349	23	1	677	73.3	4.84	10224	441.36	23	10	0	1.63587e+08	1.47658e+08	1.50648e+08	1.85521e+08	1.97534e+08	1.92441e+08	1.85105e+08	1.81909e+08	1.87763e+08
High	High	Master Protein	P55084	Trifunctional enzyme subunit beta, mitochondrial OS=Homo sapiens GN=HADHB PE=1 SV=3	0	0	61	25	512	25	1	474	51.3	9.41	10866	441.19	25	13	0	1.01291e+09	1.02348e+09	9.4795e+08	1.42955e+09	1.451e+09	1.42697e+09	1.21488e+09	1.22151e+09	1.25235e+09
High	High	Master Protein	Q01130	Serine/arginine-rich splicing factor 2 OS=Homo sapiens GN=SRSF2 PE=1 SV=4	0	0	31	8	418	6	1	221	25.5	11.85	13173	441.17	8	3	2	1.18999e+09	1.16504e+09	1.05321e+09	1.40381e+09	1.38406e+09	1.47096e+09	1.59405e+09	1.15883e+09	1.19414e+09	Acetyl [N-Term]
High	High	Master Protein	P13674	Prolyl 4-hydroxylase subunit alpha-1 OS=Homo sapiens GN=P4HA1 PE=1 SV=2	0	0	55	26	352	26	1	534	61	6.01	7256	440.25	26	15	0	2.61211e+08	2.65325e+08	2.50007e+08	4.00283e+08	4.1475e+08	4.2072e+08	2.62377e+08	2.54446e+08	2.58948e+08
High	High	Master Protein	P21359	Neurofibromin OS=Homo sapiens GN=NF1 PE=1 SV=2	0	0	30	65	453	65	1	2839	319.2	7.39	9660	440.23	62	31	0	1.52697e+08	1.72445e+08	1.6778e+08	1.59171e+08	1.65383e+08	1.68232e+08	1.71759e+08	1.78139e+08	1.70226e+08	Acetyl [N-Term]
High	High	Master Protein	P53597	Succinate--CoA ligase [ADP/GDP-forming] subunit alpha, mitochondrial OS=Homo sapiens GN=SUCLG1 PE=1 SV=4	0	0	41	14	289	14	1	346	36.2	8.79	5902	439.91	14	8	0	3.01244e+08	3.48109e+08	3.04784e+08	4.50618e+08	4.74538e+08	4.5979e+08	4.03083e+08	4.22946e+08	4.20114e+08
High	High	Master Protein	Q15008	26S proteasome non-ATPase regulatory subunit 6 OS=Homo sapiens GN=PSMD6 PE=1 SV=1	0	0	66	30	537	30	1	389	45.5	5.62	12216	439.75	29	13	0	1.15088e+09	1.20562e+09	1.0368e+09	1.49705e+09	1.44446e+09	1.49422e+09	1.46217e+09	1.42921e+09	1.43275e+09
High	High	Master Protein	Q15147	1-phosphatidylinositol 4,5-bisphosphate phosphodiesterase beta-4 OS=Homo sapiens GN=PLCB4 PE=1 SV=3	0	0	56	57	512	57	1	1175	134.4	6.9	11452	439.64	54	27	0	3.00046e+08	3.03e+08	3.00367e+08	4.39912e+08	4.63179e+08	4.44103e+08	3.97117e+08	3.91678e+08	3.83757e+08
High	High	Master Protein	O15230	Laminin subunit alpha-5 OS=Homo sapiens GN=LAMA5 PE=1 SV=8	0	0	24	60	397	59	1	3695	399.5	7.02	8697	438.86	57	30	1	7.73001e+07	8.01576e+07	7.66692e+07	9.57854e+07	1.06184e+08	1.04154e+08	8.63362e+07	8.7267e+07	9.00489e+07
High	High	Master Protein	Q96P70	Importin-9 OS=Homo sapiens GN=IPO9 PE=1 SV=3	0	0	40	32	470	32	1	1041	115.9	4.81	10926	438.54	31	17	0	6.16652e+08	6.36653e+08	5.99012e+08	7.18989e+08	7.17921e+08	6.82564e+08	6.47425e+08	6.47039e+08	6.60241e+08	Acetyl [N-Term; N-Term]
High	High	Master Protein	P80303	Nucleobindin-2 OS=Homo sapiens GN=NUCB2 PE=1 SV=2	0	0	61	27	353	27	1	420	50.2	5.12	8266	437.79	27	19	0	2.79435e+08	2.7313e+08	2.69447e+08	3.72396e+08	3.83431e+08	3.9253e+08	2.87534e+08	2.93654e+08	2.96801e+08
High	High	Master Protein	Q6DD88	Atlastin-3 OS=Homo sapiens GN=ATL3 PE=1 SV=1	0	0	55	24	418	24	1	541	60.5	5.66	10287	437.64	24	12	0	3.10006e+08	3.39305e+08	3.06724e+08	4.00704e+08	4.02591e+08	3.94141e+08	3.75837e+08	3.65809e+08	3.65127e+08
High	High	Master Protein	O75312	Zinc finger protein ZPR1 OS=Homo sapiens GN=ZPR1 PE=1 SV=1	0	0	56	20	337	20	1	459	50.9	4.73	6662	436.43	20	14	0	1.94407e+08	2.00902e+08	1.9105e+08	251914428	2.38803e+08	2.42781e+08	2.21484e+08	2.26468e+08	2.26216e+08
High	High	Master Protein	O00151	PDZ and LIM domain protein 1 OS=Homo sapiens GN=PDLIM1 PE=1 SV=4	0	0	83	19	319	19	1	329	36	7.02	7142	436.16	19	12	0	2.991e+08	2.87232e+08	3.01273e+08	3.47621e+08	3.60066e+08	3.54983e+08	3.33859e+08	3.36151e+08	3.33114e+08	Acetyl [N-Term]
High	High	Master Protein	O94905	Erlin-2 OS=Homo sapiens GN=ERLIN2 PE=1 SV=1	0	0	61	19	377	17	1	339	37.8	5.62	9771	435.93	19	12	2	4.89625e+08	5.15481e+08	4.99807e+08	6.91074e+08	7.12699e+08	7.25226e+08	5.28077e+08	5.67293e+08	5.43375e+08
High	High	Master Protein	P36507	Dual specificity mitogen-activated protein kinase kinase 2 OS=Homo sapiens GN=MAP2K2 PE=1 SV=1	0	0	59	23	341	15	1	400	44.4	6.55	8053	435.89	23	11	8	3.85048e+08	4.52822e+08	4.25193e+08	6.3104e+08	6.354e+08	6.04012e+08	4.84759e+08	4.92972e+08	4.48223e+08
High	High	Master Protein	P54802	Alpha-N-acetylglucosaminidase OS=Homo sapiens GN=NAGLU PE=1 SV=2	0	0	39	20	310	20	1	743	82.2	6.65	7851	435.81	20	13	0	1.30239e+08	1.44387e+08	141935806	1.91047e+08	2.05224e+08	2.15579e+08	1.86042e+08	1.93256e+08	1.79534e+08
High	High	Master Protein	Q13126	S-methyl-5'-thioadenosine phosphorylase OS=Homo sapiens GN=MTAP PE=1 SV=2	0	0	89	23	393	23	1	283	31.2	7.18	8895	435.48	23	13	0	4.35858e+08	4.51861e+08	4.34923e+08	5.34183e+08	5.28641e+08	5.29949e+08	4.39305e+08	4.45072e+08	4.43545e+08	Acetyl [N-Term]
High	High	Master Protein	Q5SRE5	Nucleoporin NUP188 homolog OS=Homo sapiens GN=NUP188 PE=1 SV=1	0	0	38	57	414	56	1	1749	195.9	6.73	8474	434.99	56	27	0	2.00447e+08	2.53162e+08	1.9831e+08	2.2382e+08	2.74168e+08	2.26674e+08	1.94399e+08	2.45297e+08	1.89079e+08	Acetyl [N-Term]
High	High	Master Protein	P33240	Cleavage stimulation factor subunit 2 OS=Homo sapiens GN=CSTF2 PE=1 SV=1	0	0	50	18	315	10	1	577	60.9	6.83	7309	434.83	18	10	0	1.66241e+08	1.96036e+08	1.82489e+08	2.26103e+08	2.49382e+08	2.56183e+08	1.69745e+08	1.65029e+08	1.87585e+08	Acetyl [N-Term]
High	High	Master Protein	P07108	Acyl-CoA-binding protein OS=Homo sapiens GN=DBI PE=1 SV=2	0	0	61	8	295	8	1	87	10	6.57	6392	434.67	8	4	0	1.835e+09	1.82166e+09	1.85784e+09	1.84911e+09	1.93485e+09	1.94063e+09	1.85958e+09	1.83565e+09	1.99416e+09	Acetyl [N-Term]
High	High	Master Protein	Q8TD19	Serine/threonine-protein kinase Nek9 OS=Homo sapiens GN=NEK9 PE=1 SV=2	0	0	51	39	437	39	1	979	107.1	5.74	10594	434.12	38	20	0	3.23327e+08	3.38287e+08	3.27706e+08	3.97976e+08	4.08675e+08	3.97119e+08	3.49742e+08	3.59938e+08	3.37407e+08
High	High	Master Protein	P53367	Arfaptin-1 OS=Homo sapiens GN=ARFIP1 PE=1 SV=2	0	0	59	17	298	16	1	373	41.7	6.7	6695	434.1	17	11	1	3.30916e+08	3.19672e+08	3.08811e+08	4.50652e+08	4.74095e+08	4.78322e+08	4.42156e+08	4.7236e+08	4.51903e+08
High	High	Master Protein	P68036	Ubiquitin-conjugating enzyme E2 L3 OS=Homo sapiens GN=UBE2L3 PE=1 SV=1	0	0	73	11	274	10	1	154	17.9	8.51	5580	433.27	11	6	0	8.46081e+08	8.56877e+08	8.58284e+08	9.28965e+08	1.04542e+09	9.7853e+08	8.32867e+08	8.98734e+08	7.85578e+08
High	High	Master Protein	Q9NX46	Poly(ADP-ribose) glycohydrolase ARH3 OS=Homo sapiens GN=ADPRHL2 PE=1 SV=1	0	0	68	20	328	20	1	363	38.9	5.07	6773	433.19	18	13	0	1.69856e+08	1.63179e+08	1.54576e+08	2.08235e+08	2.06456e+08	2.04207e+08	1.77426e+08	1.8548e+08	1.6763e+08	Acetyl [N-Term; N-Term]
High	High	Master Protein	Q5ZPR3	CD276 antigen OS=Homo sapiens GN=CD276 PE=1 SV=1	0	0	37	9	281	9	1	534	57.2	4.91	7422	433.01	9	7	0	9.82534e+07	1.09057e+08	1.04595e+08	1.6393e+08	1.6937e+08	1.66699e+08	1.5775e+08	1.71276e+08	1.71455e+08
High	High	Master Protein	Q96C86	m7GpppX diphosphatase OS=Homo sapiens GN=DCPS PE=1 SV=2	0	0	60	19	313	19	1	337	38.6	6.38	7846	432.97	19	10	0	3.22861e+08	3.11513e+08	2.9346e+08	4.30913e+08	4.35631e+08	4.33189e+08	4.03191e+08	3.68189e+08	3.56967e+08	Acetyl [N-Term]
High	High	Master Protein	Q04609	Glutamate carboxypeptidase 2 OS=Homo sapiens GN=FOLH1 PE=1 SV=1	0	0	46	29	499	28	1	750	84.3	6.98	11500	431.78	29	16	1	1.05811e+09	1.1354e+09	1.01358e+09	1.30436e+09	1.28622e+09	1.23247e+09	1.08804e+09	1.0908e+09	1.07254e+09	Acetyl [N-Term]
High	High	Master Protein	Q86WU2	Probable D-lactate dehydrogenase, mitochondrial OS=Homo sapiens GN=LDHD PE=1 SV=1	0	0	71	20	291	20	1	507	54.8	6.65	6917	431.6	20	16	0	1.18729e+08	1.11448e+08	1.01543e+08	1.44763e+08	1.60952e+08	1.53705e+08	1.60918e+08	1.57765e+08	1.50405e+08
High	High	Master Protein	Q52LJ0	Protein FAM98B OS=Homo sapiens GN=FAM98B PE=1 SV=1	0	0	63	17	276	15	1	330	37.2	6.29	6777	431.45	16	14	1	2.0134e+08	2.40076e+08	2.09231e+08	3.13e+08	345053008	3.18118e+08	2.83117e+08	2.479e+08	2.63493e+08
High	High	Master Protein	P52789	Hexokinase-2 OS=Homo sapiens GN=HK2 PE=1 SV=2	0	0	44	34	408	30	1	917	102.3	6.05	9308	431.17	33	22	0	2.8108e+08	2.92955e+08	2.75872e+08	3.92868e+08	4.02891e+08	4.11199e+08	1.81976e+08	1.90884e+08	1.58042e+08
High	High	Master Protein	P41091	Eukaryotic translation initiation factor 2 subunit 3 OS=Homo sapiens GN=EIF2S3 PE=1 SV=3	0	0	51	21	580	21	1	472	51.1	8.4	15303	430.92	21	9	0	1.78233e+09	2073218126	2.0024e+09	2702635354	2.85701e+09	2.75996e+09	2.47146e+09	2.40782e+09	2.33632e+09	Acetyl [N-Term]
High	High	Master Protein	Q6WCQ1	Myosin phosphatase Rho-interacting protein OS=Homo sapiens GN=MPRIP PE=1 SV=3	0	0	56	44	369	43	1	1025	116.5	6.21	9305	430.6	44	22	1	1.12946e+08	1.19155e+08	1.17685e+08	1.35811e+08	1.44789e+08	1.41018e+08	1.31441e+08	1.3552e+08	1.24616e+08
High	High	Master Protein	Q8IZH2	5'-3' exoribonuclease 1 OS=Homo sapiens GN=XRN1 PE=1 SV=1	0	0	36	47	390	47	1	1706	194	7.21	8704	430	47	20	0	1.78226e+08	1.72375e+08	1.59123e+08	2.25764e+08	2.24149e+08	2.20752e+08	1.63524e+08	1.48897e+08	1.55907e+08
High	High	Master Protein	Q14289	Protein-tyrosine kinase 2-beta OS=Homo sapiens GN=PTK2B PE=1 SV=2	0	0	55	45	396	45	1	1009	115.8	6.25	8313	429.99	44	20	0	1.52248e+08	1.51937e+08	1.56865e+08	2.15981e+08	2.20759e+08	2.15351e+08	2.3839e+08	2.34665e+08	2.24111e+08
High	High	Master Protein	P51149	Ras-related protein Rab-7a OS=Homo sapiens GN=RAB7A PE=1 SV=1	0	0	80	19	369	19	1	207	23.5	6.7	8389	429.92	18	9	0	9.54086e+08	9.11596e+08	8.82565e+08	1.16426e+09	1.17512e+09	1.182e+09	1.13322e+09	1.19458e+09	1.15106e+09
High	High	Master Protein	Q13404	Ubiquitin-conjugating enzyme E2 variant 1 OS=Homo sapiens GN=UBE2V1 PE=1 SV=2	0	0	70	10	323	4	1	147	16.5	7.93	6447	429.91	10	3	7	7.85796e+08	7.41794e+08	6.93978e+08	9.08335e+08	8.7959e+08	789796367	8.29635e+08	6.95263e+08	7.74852e+08	Acetyl [N-Term]
High	High	Master Protein	P07205	Phosphoglycerate kinase 2 OS=Homo sapiens GN=PGK2 PE=1 SV=3	0	0	22	8	323	3	1	417	44.8	8.54	7989	429.87	7	3	0	4.01743e+06	2.82238e+06	3.0924e+06	5.11414e+06	4.43879e+06	5.33639e+06	4.03216e+06	4.37676e+06	3.6716e+06
High	High	Master Protein	O95747	Serine/threonine-protein kinase OSR1 OS=Homo sapiens GN=OXSR1 PE=1 SV=1	0	0	39	20	367	15	1	527	58	6.43	8968	429.79	20	9	0	3.41971e+08	3.79135e+08	3.73245e+08	4.82364e+08	4.71844e+08	4.67148e+08	4.66099e+08	4.72982e+08	4.71221e+08
High	High	Master Protein	Q8N766	ER membrane protein complex subunit 1 OS=Homo sapiens GN=EMC1 PE=1 SV=1	0	0	48	35	438	35	1	993	111.7	7.66	10356	429.72	35	17	0	2.80626e+08	2.92118e+08	2.80253e+08	3.15954e+08	3.15317e+08	3.31068e+08	3.15292e+08	2.97715e+08	2.818e+08
High	High	Master Protein	Q9NQW7	Xaa-Pro aminopeptidase 1 OS=Homo sapiens GN=XPNPEP1 PE=1 SV=3	0	0	66	30	398	29	1	623	69.9	5.67	7762	429.52	30	14	1	7.66485e+08	6.8204e+08	6.55102e+08	7.77179e+08	8.26247e+08	8.1501e+08	7.46486e+08	7.86382e+08	7.42983e+08
High	High	Master Protein	Q9NRR5	Ubiquilin-4 OS=Homo sapiens GN=UBQLN4 PE=1 SV=2	0	0	46	20	393	15	1	601	63.8	5.22	9212	429.2	19	14	6	5.32747e+08	5.17065e+08	5.40051e+08	6.91425e+08	6.92711e+08	6.55581e+08	5.20675e+08	5.22983e+08	5.29906e+08	Acetyl [N-Term]
High	High	Master Protein	Q14692	Ribosome biogenesis protein BMS1 homolog OS=Homo sapiens GN=BMS1 PE=1 SV=1	0	0	43	47	475	47	1	1282	145.7	6.44	11468	429.17	46	23	0	2.43368e+08	2.45662e+08	2.39366e+08	2.95811e+08	3.11211e+08	2.97059e+08	3.17583e+08	3.04063e+08	2.90516e+08
High	High	Master Protein	P56537	Eukaryotic translation initiation factor 6 OS=Homo sapiens GN=EIF6 PE=1 SV=1	0	0	57	9	283	9	1	245	26.6	4.68	6715	428.78	9	7	0	6.71083e+08	7.0425e+08	5.66461e+08	9.28151e+08	7.73083e+08	9.04852e+08	8.22071e+08	7.45838e+08	9.24188e+08
High	High	None	Q9H853	Putative tubulin-like protein alpha-4B OS=Homo sapiens GN=TUBA4B PE=5 SV=2	0	0	11	2	698	0	2	241	27.5	7.83	20384	428.72	2	2	0	5.94369e+09	3.94409e+09	5.04398e+09	9.3469e+09	6.27862e+09	4.33463e+09	4.42415e+09	5.13576e+09	4.55554e+09
High	High	Master Protein	Q99700	Ataxin-2 OS=Homo sapiens GN=ATXN2 PE=1 SV=2	0	0	36	37	408	36	1	1313	140.2	9.57	10682	428.67	35	17	0	1.49201e+08	1.62614e+08	1.57014e+08	2.18141e+08	2.24603e+08	2.21809e+08	2.31079e+08	2.30044e+08	2.29401e+08
High	High	Master Protein	Q02809	Procollagen-lysine,2-oxoglutarate 5-dioxygenase 1 OS=Homo sapiens GN=PLOD1 PE=1 SV=2	0	0	50	29	357	29	1	727	83.5	6.95	7222	428.63	27	21	0	3.16966e+08	3.43999e+08	3.3086e+08	3.68124e+08	3.83234e+08	3.79035e+08	3.14054e+08	3.29423e+08	3.14164e+08
High	High	Master Protein	Q9Y618	Nuclear receptor corepressor 2 OS=Homo sapiens GN=NCOR2 PE=1 SV=2	0	0	30	53	352	51	1	2525	274.6	7.59	7302	428.55	52	26	2	1.00174e+08	9.5567e+07	9.7334e+07	1.06207e+08	1.08541e+08	1.08979e+08	8.63835e+07	9.10821e+07	9.10127e+07
High	High	Master Protein	Q99961	Endophilin-A2 OS=Homo sapiens GN=SH3GL1 PE=1 SV=1	0	0	47	16	334	16	1	368	41.5	5.43	7453	428.47	16	7	0	4.46107e+08	4.23332e+08	4.05079e+08	5.64857e+08	5.82492e+08	5.63049e+08	5.79702e+08	5.81599e+08	5.5327e+08
High	High	Master Protein	Q9Y6D5	Brefeldin A-inhibited guanine nucleotide-exchange protein 2 OS=Homo sapiens GN=ARFGEF2 PE=1 SV=3	0	0	35	52	442	38	1	1785	201.9	6.33	11209	427.98	51	19	0	9.47894e+07	1.09385e+08	9.59145e+07	1.5305e+08	1.45861e+08	1.38878e+08	114006396	1.05847e+08	1.07976e+08
High	High	Master Protein	P10768	S-formylglutathione hydrolase OS=Homo sapiens GN=ESD PE=1 SV=2	0	0	77	15	409	15	1	282	31.4	7.02	8880	427.59	15	10	0	1.01312e+09	9.4685e+08	7.63174e+08	1.07386e+09	1.10656e+09	1.07718e+09	8.93713e+08	9.22228e+08	8.78312e+08
High	High	Master Protein	Q14997	Proteasome activator complex subunit 4 OS=Homo sapiens GN=PSME4 PE=1 SV=2	0	0	35	48	409	48	1	1843	211.2	6.9	8399	427.45	47	21	0	1.45092e+08	1.47468e+08	1.43759e+08	1.60807e+08	1.66737e+08	1.65422e+08	1.57211e+08	1.60947e+08	1.56633e+08
High	High	Master Protein	O60502	Protein O-GlcNAcase OS=Homo sapiens GN=MGEA5 PE=1 SV=2	0	0	55	38	358	38	1	916	102.8	4.91	7244	427.11	37	18	0	3.48288e+08	3.47898e+08	3.37923e+08	2.86527e+08	3.13807e+08	2.86124e+08	3.45238e+08	3.49693e+08	3.33111e+08
High	High	Master Protein	Q9UBQ7	Glyoxylate reductase/hydroxypyruvate reductase OS=Homo sapiens GN=GRHPR PE=1 SV=1	0	0	60	17	328	17	1	328	35.6	7.39	8010	426.42	17	10	0	5.84624e+08	5.98606e+08	5.60193e+08	7.11444e+08	7.59376e+08	7.87839e+08	6.86841e+08	6.57521e+08	6.48633e+08
High	High	Master Protein	P36871	Phosphoglucomutase-1 OS=Homo sapiens GN=PGM1 PE=1 SV=3	0	0	64	32	419	32	1	562	61.4	6.76	9087	426.34	31	15	0	3.92527e+08	4.28561e+08	4.19569e+08	5.68553e+08	6.12439e+08	5.95957e+08	5.36214e+08	5.51336e+08	5.39072e+08
High	High	Master Protein	Q8TD30	Alanine aminotransferase 2 OS=Homo sapiens GN=GPT2 PE=1 SV=1	0	0	57	22	264	22	1	523	57.9	7.71	6102	425.75	21	16	0	7.81667e+07	8.15113e+07	7.75251e+07	1.24298e+08	1.20083e+08	1.23509e+08	1.02095e+08	1.04628e+08	9.58832e+07
High	High	Master Protein	Q09472	Histone acetyltransferase p300 OS=Homo sapiens GN=EP300 PE=1 SV=2	0	0	29	51	424	33	1	2414	264	8.5	8663	425.54	51	25	18	1.33642e+08	1.28245e+08	1.29476e+08	1.66746e+08	1.61168e+08	1.65566e+08	1.64608e+08	1.65018e+08	1.66996e+08	Acetyl [N-Term]
High	High	Master Protein	Q9P2D3	HEAT repeat-containing protein 5B OS=Homo sapiens GN=HEATR5B PE=1 SV=2	0	0	32	45	310	45	1	2071	224.2	7.17	6968	425.51	43	26	0	6.58005e+07	6.74523e+07	6.34416e+07	8.26121e+07	8.54643e+07	8.66419e+07	8.1904e+07	8.08736e+07	7.77287e+07
High	High	Master Protein	P22033	Methylmalonyl-CoA mutase, mitochondrial OS=Homo sapiens GN=MUT PE=1 SV=4	0	0	46	28	343	28	1	750	83.1	6.93	7225	425.39	27	18	0	2.07877e+08	2.12198e+08	2.04872e+08	2.54512e+08	2.38989e+08	2.42366e+08	2.70963e+08	2.65469e+08	2.56684e+08
High	High	Master Protein	Q15386	Ubiquitin-protein ligase E3C OS=Homo sapiens GN=UBE3C PE=1 SV=3	0	0	44	40	388	40	1	1083	123.8	6.71	8791	424.55	40	21	0	2.10926e+08	2.13118e+08	2.04772e+08	2.52531e+08	2.31936e+08	2.45762e+08	2.58599e+08	2.61498e+08	2.53025e+08	Acetyl [N-Term]
High	High	None	Q9NQ39	Putative 40S ribosomal protein S10-like OS=Homo sapiens GN=RPS10P5 PE=5 SV=1	0	0	25	6	283	6	1	176	20.1	10.13	7225	423.52	6	2	0	1.06695e+09	1.14136e+09	1.0267e+09	1.4473e+09	1.47149e+09	1.55721e+09	1.37226e+09	1.30594e+09	1.31118e+09
High	High	Master Protein	Q8NFW8	N-acylneuraminate cytidylyltransferase OS=Homo sapiens GN=CMAS PE=1 SV=2	0	0	49	19	321	19	1	434	48.3	7.93	6639	423.49	19	11	0	1.2504e+08	1.51434e+08	144683446	1.7744e+08	1.90517e+08	1.84439e+08	2.03946e+08	2.007e+08	1.91513e+08
High	High	Master Protein	O76031	ATP-dependent Clp protease ATP-binding subunit clpX-like, mitochondrial OS=Homo sapiens GN=CLPX PE=1 SV=2	0	0	55	30	386	30	1	633	69.2	7.58	8347	423.16	30	20	0	3.22095e+08	3.52112e+08	3.16346e+08	4.08433e+08	4.29058e+08	4.00733e+08	4.46079e+08	4.18488e+08	3.8726e+08
High	High	Master Protein	P19174	1-phosphatidylinositol 4,5-bisphosphate phosphodiesterase gamma-1 OS=Homo sapiens GN=PLCG1 PE=1 SV=1	0	0	41	42	411	42	1	1290	148.4	6.05	9338	422.98	42	19	0	1.80763e+08	1.84696e+08	1.81577e+08	2.03285e+08	2.20013e+08	2.19779e+08	2.01006e+08	2.05122e+08	2.08937e+08	Acetyl [N-Term]
High	High	Master Protein	O14929	Histone acetyltransferase type B catalytic subunit OS=Homo sapiens GN=HAT1 PE=1 SV=1	0	0	59	15	338	15	1	419	49.5	5.69	9109	422.78	15	10	0	4.20502e+08	428422308	4.08685e+08	4.73852e+08	4.84426e+08	4.66731e+08	3.76329e+08	3.87382e+08	3.57614e+08	Acetyl [N-Term]
High	High	Master Protein	O76003	Glutaredoxin-3 OS=Homo sapiens GN=GLRX3 PE=1 SV=2	0	0	66	19	297	19	1	335	37.4	5.39	5644	422.05	18	12	0	6.44181e+08	6.08896e+08	5.84435e+08	6.96503e+08	7.14924e+08	7.3227e+08	6.38107e+08	6.23009e+08	6.34847e+08	Acetyl [N-Term]
High	High	Master Protein	Q8NCA5	Protein FAM98A OS=Homo sapiens GN=FAM98A PE=1 SV=1	0	0	39	13	248	11	1	519	55.4	9.03	5655	421.97	13	12	0	1.29943e+08	154140396	1.42114e+08	1.97977e+08	1.83229e+08	1.75284e+08	1.93905e+08	1.70287e+08	1.87047e+08
High	High	Master Protein	Q6PJG6	BRCA1-associated ATM activator 1 OS=Homo sapiens GN=BRAT1 PE=1 SV=2	0	0	65	33	334	33	1	821	88.1	5.27	7518	421.97	32	21	0	1.32031e+08	1.47916e+08	1.39889e+08	1.55121e+08	1.56234e+08	1.53455e+08	1.41729e+08	1.37522e+08	1.38455e+08
High	High	Master Protein	Q96C36	Pyrroline-5-carboxylate reductase 2 OS=Homo sapiens GN=PYCR2 PE=1 SV=1	0	0	66	18	419	17	1	320	33.6	7.77	11874	421.89	18	13	0	2.15981e+08	2.09571e+08	2.08033e+08	2.46696e+08	2.72596e+08	2.75256e+08	2.18044e+08	2.37029e+08	2.27218e+08	Acetyl [N-Term]
High	High	Master Protein	P51812	Ribosomal protein S6 kinase alpha-3 OS=Homo sapiens GN=RPS6KA3 PE=1 SV=1	0	0	65	40	438	27	1	740	83.7	6.89	9797	421.73	40	19	2	2.07988e+08	2.12845e+08	2.15508e+08	2.86212e+08	2.82336e+08	281604587	2.65932e+08	2.67795e+08	2.70445e+08
High	High	Master Protein	P39656	Dolichyl-diphosphooligosaccharide--protein glycosyltransferase 48 kDa subunit OS=Homo sapiens GN=DDOST PE=1 SV=4	0	0	47	16	317	16	1	456	50.8	6.55	6884	421.67	16	10	0	4.82735e+08	4.33481e+08	4.32528e+08	5.96026e+08	5.85287e+08	6.02544e+08	5.06836e+08	5.30485e+08	5.18496e+08
High	High	Master Protein	Q96I24	Far upstream element-binding protein 3 OS=Homo sapiens GN=FUBP3 PE=1 SV=2	0	0	71	32	443	27	1	572	61.6	8.38	9179	421.64	31	15	0	2.77559e+08	3.00435e+08	3.01692e+08	4.19383e+08	4.04282e+08	4.06275e+08	3.79095e+08	3.90048e+08	3.87896e+08	Acetyl [N-Term]
High	High	Master Protein	P31937	3-hydroxyisobutyrate dehydrogenase, mitochondrial OS=Homo sapiens GN=HIBADH PE=1 SV=2	0	0	56	12	257	12	1	336	35.3	8.13	5745	421.59	11	11	0	2.08004e+08	2.12225e+08	1.97438e+08	2.74314e+08	2.92213e+08	2.83548e+08	2.24485e+08	2.38005e+08	2.20807e+08
High	High	Master Protein	A2RTX5	Probable threonine--tRNA ligase 2, cytoplasmic OS=Homo sapiens GN=TARSL2 PE=1 SV=1	0	0	49	32	349	29	1	802	92.6	6.05	7888	421.54	32	15	0	1.29603e+08	1.28209e+08	1.25301e+08	1.95347e+08	1.95808e+08	1.99407e+08	1.88494e+08	1.89401e+08	1.84462e+08	Acetyl [N-Term]
High	High	Master Protein	Q13823	Nucleolar GTP-binding protein 2 OS=Homo sapiens GN=GNL2 PE=1 SV=1	0	0	46	32	439	32	1	731	83.6	9.25	10158	421.39	32	14	0	3.5627e+08	3.58554e+08	3.41903e+08	4.33261e+08	4.62063e+08	4.28688e+08	4.08217e+08	4.44881e+08	4.44317e+08
High	High	Master Protein	Q14669	E3 ubiquitin-protein ligase TRIP12 OS=Homo sapiens GN=TRIP12 PE=1 SV=1	0	0	34	51	421	51	1	1992	220.3	8.48	10829	421.14	48	27	0	9.40766e+07	9.56603e+07	9.47444e+07	1.24865e+08	1.28226e+08	1.3132e+08	1.17111e+08	1.23359e+08	1.15569e+08	Acetyl [N-Term]
High	High	Master Protein	Q9NU22	Midasin OS=Homo sapiens GN=MDN1 PE=1 SV=2	0	0	24	94	472	93	1	5596	632.4	5.68	10663	421.13	89	37	1	1.26738e+08	1.30346e+08	1.22837e+08	1.45621e+08	1.38709e+08	1.38783e+08	1.17188e+08	1.20674e+08	1.12864e+08
High	High	Master Protein	P54819	Adenylate kinase 2, mitochondrial OS=Homo sapiens GN=AK2 PE=1 SV=2	0	0	76	19	464	19	1	239	26.5	7.81	11131	420.54	19	9	0	7.31573e+08	7.74916e+08	7.48001e+08	1.05567e+09	9.91154e+08	1.0212e+09	8.90264e+08	8.36768e+08	8.19798e+08
High	High	Master Protein	P23193	Transcription elongation factor A protein 1 OS=Homo sapiens GN=TCEA1 PE=1 SV=2	0	0	60	18	422	16	1	301	33.9	8.38	11363	420.24	18	9	2	6.25231e+08	6.82023e+08	6.46885e+08	7.13888e+08	7.14158e+08	7.26594e+08	4.34785e+08	4.7447e+08	4.33482e+08	Acetyl [N-Term]
High	High	Master Protein	P11388	DNA topoisomerase 2-alpha OS=Homo sapiens GN=TOP2A PE=1 SV=3	0	0	34	50	446	35	1	1531	174.3	8.72	9737	420.18	49	21	0	1.44511e+08	1.48089e+08	1.45797e+08	2.12088e+08	2.22744e+08	2.29463e+08	1.0653e+08	1.11916e+08	1.06269e+08	Acetyl [N-Term]
High	High	Master Protein	P10275	Androgen receptor OS=Homo sapiens GN=AR PE=1 SV=3	0	0	47	28	327	28	1	920	99.1	6.42	8481	419.72	27	16	0	1.34034e+08	1.24807e+08	1.15374e+08	1.68351e+08	1.83099e+08	1.80595e+08	1.51363e+08	1.47248e+08	1.45983e+08	Acetyl [N-Term]
High	High	Master Protein	O43818	U3 small nucleolar RNA-interacting protein 2 OS=Homo sapiens GN=RRP9 PE=1 SV=1	0	0	50	23	333	23	1	475	51.8	7.85	8840	419.46	23	8	0	2.77817e+08	3.01442e+08	294523491	3.21103e+08	3.38452e+08	3.33354e+08	3.75907e+08	3.76342e+08	3.42885e+08
High	High	Master Protein	P62888	60S ribosomal protein L30 OS=Homo sapiens GN=RPL30 PE=1 SV=2	0	0	66	8	318	8	1	115	12.8	9.63	7759	419.38	8	4	0	1391308402	1.67936e+09	1510112984	1.84158e+09	1.95975e+09	1.89684e+09	1.90271e+09	1.85351e+09	1.73108e+09
High	High	Master Protein	Q13098	COP9 signalosome complex subunit 1 OS=Homo sapiens GN=GPS1 PE=1 SV=4	0	0	45	22	423	22	1	491	55.5	6.74	9695	419.24	22	15	0	6.28832e+08	6.18431e+08	5.97613e+08	8.13502e+08	813491178	8.09252e+08	7.40234e+08	7.60908e+08	7.25658e+08
High	High	Master Protein	Q9H0L4	Cleavage stimulation factor subunit 2 tau variant OS=Homo sapiens GN=CSTF2T PE=1 SV=1	0	0	56	23	309	15	1	616	64.4	7.25	7984	418.65	23	12	7	2.2777e+08	2.45048e+08	2.52537e+08	3.14523e+08	2.9677e+08	2.93246e+08	2.64642e+08	2.4809e+08	2.59739e+08	Acetyl [N-Term]
High	High	Master Protein	Q9UJC3	Protein Hook homolog 1 OS=Homo sapiens GN=HOOK1 PE=1 SV=2	0	0	54	41	370	41	1	728	84.6	5.15	8835	417.73	38	17	0	3.13659e+08	3.3015e+08	3.27255e+08	4.60881e+08	4.84289e+08	4.96785e+08	5.30747e+08	5.54904e+08	5.27378e+08	Acetyl [N-Term]
High	High	Master Protein	P20020	Plasma membrane calcium-transporting ATPase 1 OS=Homo sapiens GN=ATP2B1 PE=1 SV=3	0	0	32	29	326	19	1	1258	138.7	6.04	7762	417.23	29	16	12	1.66076e+08	1.69196e+08	1.55937e+08	2.16998e+08	2.22262e+08	2.10064e+08	2.04917e+08	2.11424e+08	2.0054e+08	Acetyl [N-Term]
High	High	Master Protein	P98194	Calcium-transporting ATPase type 2C member 1 OS=Homo sapiens GN=ATP2C1 PE=1 SV=3	0	0	36	27	341	27	1	919	100.5	6.74	8785	416.97	27	13	0	1.42365e+08	1.4527e+08	1.39747e+08	2.04011e+08	2.01318e+08	2.10443e+08	1.76897e+08	1.68623e+08	1.83927e+08
High	High	Master Protein	Q03252	Lamin-B2 OS=Homo sapiens GN=LMNB2 PE=1 SV=4	0	0	69	49	648	45	1	620	69.9	5.59	14716	416.41	49	25	0	8.15095e+08	8.79996e+08	7.97002e+08	1.05198e+09	1.01144e+09	9.51442e+08	8.52859e+08	8.08361e+08	8.75098e+08
High	High	Master Protein	Q02487	Desmocollin-2 OS=Homo sapiens GN=DSC2 PE=1 SV=1	0	0	44	31	338	28	1	901	99.9	5.34	7644	416.3	31	16	3	1.65288e+08	1.79527e+08	2.02098e+08	1.98557e+08	2.13338e+08	2.06102e+08	2.89289e+08	2.99477e+08	2.92798e+08
High	High	Master Protein	P62158	Calmodulin OS=Homo sapiens GN=CALM1 PE=1 SV=2	0	0	96	15	555	15	1	149	16.8	4.22	12740	416.27	14	5	0	4.88272e+09	5.01691e+09	4.96132e+09	6.55336e+09	6.45599e+09	6.36578e+09	5.60152e+09	5.59648e+09	5.51874e+09	Acetyl [N-Term]
High	High	Master Protein	Q96KG9	N-terminal kinase-like protein OS=Homo sapiens GN=SCYL1 PE=1 SV=1	0	0	48	26	329	26	1	808	89.6	6.3	7102	415.68	26	15	0	2.32258e+08	2.35504e+08	2.26937e+08	2.95509e+08	2.9623e+08	2.90113e+08	2.63433e+08	2.86379e+08	2.64526e+08
High	High	Master Protein	P62316	Small nuclear ribonucleoprotein Sm D2 OS=Homo sapiens GN=SNRPD2 PE=1 SV=1	0	0	65	10	324	10	1	118	13.5	9.91	6806	415.58	9	5	0	1.30696e+09	1.29069e+09	1.16433e+09	1.43485e+09	1.53664e+09	1.45605e+09	1.40842e+09	1.37899e+09	1.37663e+09	Acetyl [N-Term]
High	High	Master Protein	O00442	RNA 3'-terminal phosphate cyclase OS=Homo sapiens GN=RTCA PE=1 SV=1	0	0	55	18	336	18	1	366	39.3	7.85	8852	415.48	17	11	0	2.53531e+08	2.61117e+08	2.56922e+08	3.66787e+08	3.65329e+08	3.30626e+08	3.37798e+08	3.4391e+08	3.15396e+08
High	High	Master Protein	Q9Y4D8	Probable E3 ubiquitin-protein ligase HECTD4 OS=Homo sapiens GN=HECTD4 PE=1 SV=5	0	0	21	59	373	59	1	3996	439.1	6.19	8969	415.3	56	28	0	9.95227e+07	9.67334e+07	8.60751e+07	1.11451e+08	1.09705e+08	1.07253e+08	1.30733e+08	1.30998e+08	1.30815e+08
High	High	Master Protein	Q07955	Serine/arginine-rich splicing factor 1 OS=Homo sapiens GN=SRSF1 PE=1 SV=2	0	0	64	26	670	25	1	248	27.7	10.36	17393	414.35	25	12	1	2.04959e+09	1.98299e+09	1.8969e+09	2.23052e+09	2.32619e+09	2.36036e+09	2067480540	1.98579e+09	2.01481e+09	Acetyl [N-Term]
High	High	Master Protein	O43583	Density-regulated protein OS=Homo sapiens GN=DENR PE=1 SV=2	0	0	54	10	303	10	1	198	22.1	5.3	9386	414.17	10	6	0	2.05753e+08	2.14056e+08	2.08672e+08	2.82883e+08	2.76815e+08	2.7762e+08	2.92502e+08	2.89795e+08	2.83704e+08	Acetyl [N-Term]
High	High	Master Protein	Q14687	Genetic suppressor element 1 OS=Homo sapiens GN=GSE1 PE=1 SV=3	0	0	46	38	313	38	1	1217	136.1	7.74	6307	413.93	37	18	0	1.16674e+08	1.07251e+08	1.10826e+08	1.51087e+08	1.35454e+08	1.2746e+08	1.19702e+08	1.11403e+08	1.14439e+08
High	High	Master Protein	O95714	E3 ubiquitin-protein ligase HERC2 OS=Homo sapiens GN=HERC2 PE=1 SV=2	0	0	19	65	384	65	1	4834	526.9	6.28	9071	413.59	63	28	0	1.54821e+08	1.60833e+08	1.46735e+08	1.79524e+08	1.77941e+08	1.75468e+08	1.72981e+08	1.80951e+08	1.56492e+08
High	High	Master Protein	Q99733	Nucleosome assembly protein 1-like 4 OS=Homo sapiens GN=NAP1L4 PE=1 SV=1	0	0	48	17	363	15	1	375	42.8	4.69	8831	413.54	17	11	0	5.31779e+08	5.39369e+08	5.09942e+08	7.04733e+08	6.91997e+08	7.1967e+08	636518636	6.79197e+08	6.33947e+08	Acetyl [N-Term]
High	High	Master Protein	Q86VM9	Zinc finger CCCH domain-containing protein 18 OS=Homo sapiens GN=ZC3H18 PE=1 SV=2	0	0	39	29	322	29	1	953	106.3	8.32	7254	413.51	28	9	0	1.1842e+08	1.21291e+08	1.11407e+08	1.50948e+08	1.51862e+08	1.53582e+08	1.2811e+08	1.17015e+08	1.19022e+08
High	High	Master Protein	Q12830	Nucleosome-remodeling factor subunit BPTF OS=Homo sapiens GN=BPTF PE=1 SV=3	0	0	27	57	379	57	1	3046	338.1	6.54	9080	413.46	53	29	0	9.77044e+07	9.98051e+07	9.63175e+07	1.12591e+08	1.10852e+08	1.10471e+08	1.01834e+08	9.69887e+07	9.06291e+07
High	High	Master Protein	Q01581	Hydroxymethylglutaryl-CoA synthase, cytoplasmic OS=Homo sapiens GN=HMGCS1 PE=1 SV=2	0	0	58	21	304	20	1	520	57.3	5.41	6686	413.2	21	14	1	1.59391e+08	1.66699e+08	1.67085e+08	1.99946e+08	2.02757e+08	2.08167e+08	2.3553e+08	2.47018e+08	2.22976e+08
High	High	Master Protein	O00625	Pirin OS=Homo sapiens GN=PIR PE=1 SV=1	0	0	62	15	319	15	1	290	32.1	6.92	6555	413.08	14	10	0	3.4407e+08	3.02336e+08	2.97951e+08	4.31592e+08	4.27425e+08	4.22783e+08	4.45146e+08	4.20087e+08	3.99937e+08
High	High	Master Protein	Q96JB2	Conserved oligomeric Golgi complex subunit 3 OS=Homo sapiens GN=COG3 PE=1 SV=3	0	0	57	43	372	43	1	828	94	5.57	8293	412.91	43	21	0	2.31144e+08	2.3087e+08	2.18687e+08	3.11228e+08	3.12767e+08	3.13483e+08	2.9057e+08	2.83067e+08	2.82449e+08	Acetyl [N-Term]
High	High	Master Protein	O43237	Cytoplasmic dynein 1 light intermediate chain 2 OS=Homo sapiens GN=DYNC1LI2 PE=1 SV=1	0	0	60	25	343	24	1	492	54.1	6.38	8535	412.65	24	17	0	2.48453e+08	2.51937e+08	2.41288e+08	3.39087e+08	3.45732e+08	3.59992e+08	3.30875e+08	3.41175e+08	3.37197e+08
High	High	Master Protein	P49366	Deoxyhypusine synthase OS=Homo sapiens GN=DHPS PE=1 SV=1	0	0	67	17	273	17	1	369	40.9	5.36	5743	412.63	17	9	0	1.25237e+08	1.31984e+08	1.26512e+08	1.80778e+08	1.74362e+08	1.72977e+08	1.81917e+08	1.79965e+08	1.70392e+08
High	High	Master Protein	P09661	U2 small nuclear ribonucleoprotein A' OS=Homo sapiens GN=SNRPA1 PE=1 SV=2	0	0	58	15	332	15	1	255	28.4	8.62	6930	412.25	15	6	0	2.76807e+08	3.20458e+08	3.17981e+08	3.88907e+08	4.34924e+08	4.15395e+08	2.90595e+08	3.05916e+08	2.88942e+08
High	High	Master Protein	Q9NNW5	WD repeat-containing protein 6 OS=Homo sapiens GN=WDR6 PE=1 SV=1	0	0	45	34	346	34	1	1121	121.6	6.87	7207	412.21	32	19	0	1.54228e+08	1.57257e+08	1.47854e+08	2.06273e+08	2.07929e+08	2.08184e+08	2.26855e+08	2.21705e+08	2.22142e+08	Acetyl [N-Term]
High	High	Master Protein	O75832	26S proteasome non-ATPase regulatory subunit 10 OS=Homo sapiens GN=PSMD10 PE=1 SV=1	0	0	59	11	270	11	1	226	24.4	6.1	6380	411.74	11	9	0	3.62402e+08	3.11426e+08	3.14186e+08	4.16053e+08	3.75995e+08	4.03649e+08	3.55814e+08	3.66697e+08	3.61443e+08	Acetyl [N-Term]
High	High	Master Protein	Q12797	Aspartyl/asparaginyl beta-hydroxylase OS=Homo sapiens GN=ASPH PE=1 SV=3	0	0	43	27	303	27	1	758	85.8	5.01	9742	411.48	25	12	0	5.65924e+07	5.516e+07	5.2233e+07	7.36371e+07	7.97509e+07	7.94752e+07	6.61249e+07	69419223	7.32494e+07
High	High	Master Protein	O60333	Kinesin-like protein KIF1B OS=Homo sapiens GN=KIF1B PE=1 SV=5	0	0	31	42	359	27	1	1816	204.3	5.6	7775	411.01	39	22	1	4.56566e+07	4.89553e+07	4.54145e+07	7.03708e+07	7.68369e+07	6.91545e+07	6.1628e+07	6.25175e+07	5.97798e+07
High	High	Master Protein	P48047	ATP synthase subunit O, mitochondrial OS=Homo sapiens GN=ATP5O PE=1 SV=1	0	0	59	11	310	11	1	213	23.3	9.96	7482	410.95	11	7	0	7.26494e+08	6.92945e+08	6.90386e+08	1.16915e+09	1.12619e+09	1.07119e+09	8.57725e+08	8.33536e+08	7.90043e+08
High	High	Master Protein	O96013	Serine/threonine-protein kinase PAK 4 OS=Homo sapiens GN=PAK4 PE=1 SV=1	0	0	48	23	323	23	1	591	64	9.73	7968	410.94	23	13	0	3.38473e+08	2.95942e+08	2.81422e+08	3.98439e+08	4.03302e+08	4.19863e+08	3.40478e+08	3.42431e+08	3.357e+08
High	High	Master Protein	A6NKD9	Coiled-coil domain-containing protein 85C OS=Homo sapiens GN=CCDC85C PE=1 SV=1	0	0	47	16	261	16	1	419	45.2	6.96	7005	410.13	16	6	0	7.49074e+07	7.07311e+07	6.22663e+07	9.96944e+07	1.12647e+08	1.0903e+08	97812754	1.01828e+08	9.64328e+07
High	High	Master Protein	P25789	Proteasome subunit alpha type-4 OS=Homo sapiens GN=PSMA4 PE=1 SV=1	0	0	59	12	353	12	1	261	29.5	7.72	10033	410.04	12	5	0	1.15144e+09	1.20086e+09	1.12364e+09	1.47248e+09	1.4629e+09	1.51428e+09	1.49275e+09	1.47702e+09	1.49444e+09
High	High	Master Protein	Q8IZL8	Proline-, glutamic acid- and leucine-rich protein 1 OS=Homo sapiens GN=PELP1 PE=1 SV=2	0	0	47	34	310	34	1	1130	119.6	4.34	6999	409.77	32	18	0	1.5675e+08	1.59599e+08	1.55855e+08	2.0002e+08	2.13111e+08	2.1294e+08	1.87761e+08	1.92037e+08	1.87784e+08	Acetyl [N-Term]
High	High	Master Protein	Q9Y5K6	CD2-associated protein OS=Homo sapiens GN=CD2AP PE=1 SV=1	0	0	73	48	558	48	1	639	71.4	6.4	12904	409.47	48	21	0	7.14364e+08	6.96953e+08	7.42759e+08	9.23584e+08	9.69421e+08	9.41779e+08	9.14377e+08	9.29535e+08	9.22038e+08	Acetyl [N-Term]
High	High	Master Protein	Q9HD20	Manganese-transporting ATPase 13A1 OS=Homo sapiens GN=ATP13A1 PE=1 SV=2	0	0	45	39	405	39	1	1204	132.9	8.13	9067	409.21	39	20	0	2.49773e+08	2.69823e+08	2.49901e+08	2.9702e+08	2.94966e+08	3.02908e+08	3.01603e+08	2.86981e+08	2.81149e+08	Acetyl [N-Term]
High	High	Master Protein	P40222	Alpha-taxilin OS=Homo sapiens GN=TXLNA PE=1 SV=3	0	0	73	42	488	42	1	546	61.9	6.52	11249	408.49	41	15	0	5.83417e+08	6.14969e+08	6.02199e+08	7.41987e+08	7.70361e+08	7.66287e+08	7.22277e+08	7.84766e+08	7.10134e+08
High	High	Master Protein	Q9Y6Y8	SEC23-interacting protein OS=Homo sapiens GN=SEC23IP PE=1 SV=1	0	0	51	44	470	42	1	1000	111	5.54	10111	408.41	44	18	2	6.04869e+08	6.62182e+08	6.08962e+08	7.68623e+08	7.94729e+08	8.12292e+08	8.26313e+08	8.15277e+08	7.90658e+08
High	High	Master Protein	P57740	Nuclear pore complex protein Nup107 OS=Homo sapiens GN=NUP107 PE=1 SV=1	0	0	50	38	362	38	1	925	106.3	5.43	7897	408.08	38	20	0	2.59588e+08	2.67399e+08	2.55857e+08	3.45809e+08	3.27474e+08	3.23188e+08	3.05376e+08	2.97336e+08	2.93776e+08
High	High	Master Protein	Q7Z3J2	UPF0505 protein C16orf62 OS=Homo sapiens GN=C16orf62 PE=1 SV=2	0	0	45	37	337	37	1	963	109.5	7.21	7657	407.92	35	17	0	1.04642e+08	1.03187e+08	9.60146e+07	1.25454e+08	1.36368e+08	1.29886e+08	1.18537e+08	1.19807e+08	1.05873e+08
High	High	Master Protein	Q15185	Prostaglandin E synthase 3 OS=Homo sapiens GN=PTGES3 PE=1 SV=1	0	0	51	9	293	9	1	160	18.7	4.54	7045	407.87	9	5	0	3.8822e+09	3842734489	3.66407e+09	3842036014	4.11267e+09	4.10255e+09	4.17102e+09	4.09475e+09	4.06013e+09
High	High	Master Protein	Q8NI27	THO complex subunit 2 OS=Homo sapiens GN=THOC2 PE=1 SV=2	0	0	44	61	508	60	1	1593	182.7	8.44	12410	407.78	60	18	0	3.71192e+08	3.62925e+08	3.4526e+08	4.46919e+08	4.57061e+08	4.40962e+08	3.85757e+08	3.76811e+08	3.69772e+08	Acetyl [N-Term]
High	High	Master Protein	P09525	Annexin A4 OS=Homo sapiens GN=ANXA4 PE=1 SV=4	0	0	64	24	423	23	1	319	35.9	6.13	11534	407.45	24	12	0	6.03413e+08	6.23553e+08	5.9571e+08	7.40133e+08	7.835e+08	7.35739e+08	6.97069e+08	662725595	7.03833e+08
High	High	Master Protein	Q9NZN5	Rho guanine nucleotide exchange factor 12 OS=Homo sapiens GN=ARHGEF12 PE=1 SV=1	0	0	36	37	317	37	1	1544	173.1	5.74	8129	407.1	36	21	0	5.94005e+07	6.20266e+07	5.82987e+07	8.44782e+07	8.80494e+07	8.44413e+07	8.04675e+07	8.52184e+07	8.44382e+07	Acetyl [N-Term]
High	High	Master Protein	Q5T6F2	Ubiquitin-associated protein 2 OS=Homo sapiens GN=UBAP2 PE=1 SV=1	0	0	34	21	320	21	1	1119	117	7.34	6972	407.04	20	16	0	1.28228e+08	1.08093e+08	1.20523e+08	1.44881e+08	1.54799e+08	1.60384e+08	1.22849e+08	1.23975e+08	1.19399e+08
High	High	Master Protein	Q9H6T3	RNA polymerase II-associated protein 3 OS=Homo sapiens GN=RPAP3 PE=1 SV=2	0	0	48	32	386	32	1	665	75.7	6.84	9591	406.92	32	18	0	2.11411e+08	2.19586e+08	209210688	2.79238e+08	2.97487e+08	2.92265e+08	2.65518e+08	2.67234e+08	2.67118e+08
High	High	Master Protein	Q07020	60S ribosomal protein L18 OS=Homo sapiens GN=RPL18 PE=1 SV=2	0	0	48	13	412	13	1	188	21.6	11.72	11127	406.86	13	5	0	2.33529e+09	2.52325e+09	2.56456e+09	2.8791e+09	3.35025e+09	3.47547e+09	3.23583e+09	3.40069e+09	2.97094e+09
High	High	Master Protein	O14841	5-oxoprolinase OS=Homo sapiens GN=OPLAH PE=1 SV=3	0	0	31	32	343	32	1	1288	137.4	6.58	8497	406.63	32	20	0	1.32967e+08	1.27648e+08	1.40059e+08	1.97978e+08	1.94889e+08	2.04884e+08	2.12779e+08	2.17834e+08	1.916e+08
High	High	Master Protein	P30837	Aldehyde dehydrogenase X, mitochondrial OS=Homo sapiens GN=ALDH1B1 PE=1 SV=3	0	0	59	26	375	22	1	517	57.2	6.8	9046	406.05	26	17	2	310983337	3.25974e+08	3.30965e+08	3.77973e+08	4.2869e+08	4.09421e+08	4.16943e+08	4.18045e+08	3.75633e+08
High	High	Master Protein	Q7Z434	Mitochondrial antiviral-signaling protein OS=Homo sapiens GN=MAVS PE=1 SV=2	0	0	79	21	293	21	1	540	56.5	5.52	7292	406	20	13	0	1.55021e+08	1.6562e+08	1.55587e+08	2.25062e+08	2.3264e+08	2.0732e+08	1.89657e+08	1.97045e+08	2.04596e+08
High	High	Master Protein	Q14527	Helicase-like transcription factor OS=Homo sapiens GN=HLTF PE=1 SV=2	0	0	52	42	412	42	1	1009	113.9	8.6	8772	405.64	42	22	0	1.80834e+08	1.92749e+08	1.86433e+08	2.01379e+08	2.13353e+08	2.02199e+08	1.58393e+08	1.53669e+08	1.51594e+08
High	High	Master Protein	P21399	Cytoplasmic aconitate hydratase OS=Homo sapiens GN=ACO1 PE=1 SV=3	0	0	51	40	426	40	1	889	98.3	6.68	9465	405.55	39	14	0	6.51414e+08	6.16826e+08	6.10552e+08	7.88065e+08	8.09854e+08	7.88438e+08	7.22036e+08	7.60087e+08	684250906	Acetyl [N-Term]
High	High	Master Protein	Q13796	Protein Shroom2 OS=Homo sapiens GN=SHROOM2 PE=1 SV=1	0	0	45	50	380	49	1	1616	176.3	7.09	9470	405.03	49	26	1	1.11534e+08	1.12372e+08	1.09741e+08	1.51932e+08	1.59357e+08	1.62752e+08	1.45434e+08	1.55114e+08	1.48521e+08
High	High	Master Protein	Q00169	Phosphatidylinositol transfer protein alpha isoform OS=Homo sapiens GN=PITPNA PE=1 SV=2	0	0	70	22	382	16	1	270	31.8	6.55	8657	404.86	22	5	6	6.15133e+08	6.11374e+08	6.04223e+08	8.50397e+08	8.93024e+08	889300203	8.73356e+08	8.4281e+08	8.53304e+08
High	High	Master Protein	P18858	DNA ligase 1 OS=Homo sapiens GN=LIG1 PE=1 SV=1	0	0	53	37	313	37	1	919	101.7	5.62	6525	404.8	35	24	0	1.35225e+08	1.34151e+08	1.38486e+08	1.61083e+08	1.64964e+08	1.70799e+08	1.05366e+08	1.08544e+08	102656175
High	High	Master Protein	Q86U44	N6-adenosine-methyltransferase 70 kDa subunit OS=Homo sapiens GN=METTL3 PE=1 SV=2	0	0	58	26	312	26	1	580	64.4	6.42	6826	404.66	26	17	0	1.43842e+08	1.49009e+08	1.46316e+08	1.71272e+08	1.62177e+08	1.71447e+08	1.37033e+08	1.37734e+08	1.39582e+08	Acetyl [N-Term]
High	High	Master Protein	Q14694	Ubiquitin carboxyl-terminal hydrolase 10 OS=Homo sapiens GN=USP10 PE=1 SV=2	0	0	50	34	300	34	1	798	87.1	5.31	6580	404.46	34	18	0	2.65148e+08	2.83415e+08	2.57931e+08	3.06549e+08	3.22461e+08	3.04038e+08	3.08604e+08	3.04656e+08	2.97443e+08
High	High	Master Protein	P18615	Negative elongation factor E OS=Homo sapiens GN=NELFE PE=1 SV=3	0	0	59	19	281	19	1	380	43.2	9.33	8101	404	19	12	0	9.72943e+07	9.64693e+07	9.23841e+07	1.29014e+08	133282218	1.27424e+08	1.06111e+08	1.03039e+08	1.08001e+08
High	High	Master Protein	P33527	Multidrug resistance-associated protein 1 OS=Homo sapiens GN=ABCC1 PE=1 SV=3	0	0	31	37	346	36	1	1531	171.5	7.11	8940	403.23	35	20	0	1.21149e+08	1.24749e+08	1.1379e+08	1.21264e+08	1.18129e+08	1.28996e+08	1.47129e+08	1.47039e+08	1.4583e+08
High	High	Master Protein	Q8TEU7	Rap guanine nucleotide exchange factor 6 OS=Homo sapiens GN=RAPGEF6 PE=1 SV=2	0	0	31	36	341	32	1	1601	179.3	6.4	8436	403.13	35	22	4	8.6587e+07	8.36325e+07	8.04392e+07	9.88576e+07	1.01874e+08	1.05898e+08	7.62446e+07	7.80787e+07	7.57833e+07
High	High	Master Protein	P07288	Prostate-specific antigen OS=Homo sapiens GN=KLK3 PE=1 SV=2	0	0	74	10	278	9	1	261	28.7	7.68	5667	402.71	10	9	1	6.99648e+08	6.87086e+08	6.85884e+08	7.98248e+08	8.10899e+08	8.00042e+08	5.97375e+08	5.57763e+08	5.33218e+08
High	High	Master Protein	Q969G3	SWI/SNF-related matrix-associated actin-dependent regulator of chromatin subfamily E member 1 OS=Homo sapiens GN=SMARCE1 PE=1 SV=2	0	0	65	23	313	22	1	411	46.6	4.88	6621	402.53	23	14	0	3.62674e+08	3.99738e+08	3.4678e+08	4.85512e+08	4.88937e+08	4.653e+08	3.92937e+08	3.8808e+08	3.61895e+08
High	High	Master Protein	Q6ZVM7	TOM1-like protein 2 OS=Homo sapiens GN=TOM1L2 PE=1 SV=1	0	0	60	24	311	24	1	507	55.5	4.79	7461	402.48	23	14	0	1.25477e+08	1.27942e+08	1.2487e+08	2.00216e+08	2.02768e+08	2.03913e+08	2.03553e+08	2.00174e+08	1.86379e+08	Acetyl [N-Term]
High	High	Master Protein	Q9BXW7	Cat eye syndrome critical region protein 5 OS=Homo sapiens GN=CECR5 PE=1 SV=1	0	0	48	16	265	16	1	423	46.3	8.13	7025	402.25	16	10	0	1.80147e+08	1.94915e+08	1.63095e+08	2.15321e+08	2.25408e+08	2.20649e+08	2.1913e+08	2.00395e+08	1.94581e+08
High	High	Master Protein	Q9Y5A9	YTH domain-containing family protein 2 OS=Homo sapiens GN=YTHDF2 PE=1 SV=2	0	0	46	21	380	17	1	579	62.3	8.79	9385	401.64	21	12	5	5.58069e+08	5.47167e+08	5.37827e+08	6.70458e+08	7.36439e+08	7.12729e+08	6.33909e+08	6.84118e+08	6.48704e+08	Acetyl [N-Term]
High	High	Master Protein	Q92688	Acidic leucine-rich nuclear phosphoprotein 32 family member B OS=Homo sapiens GN=ANP32B PE=1 SV=1	0	0	43	11	287	7	1	251	28.8	4.06	6591	400.64	11	3	0	1.10359e+09	1.09881e+09	1.00207e+09	1.3918e+09	1.49534e+09	1.44461e+09	1.21711e+09	1.28837e+09	1.07021e+09
High	High	None	Q93084	Sarcoplasmic/endoplasmic reticulum calcium ATPase 3 OS=Homo sapiens GN=ATP2A3 PE=1 SV=2	0	0	8	8	255	8	1	1043	113.9	5.57	6986	400.58	8	5	0	3.71583e+08	3.64592e+08	3.39003e+08	4.33284e+08	4.75567e+08	465565781	4.45155e+08	4.67736e+08	4.41662e+08
High	High	Master Protein	P48163	NADP-dependent malic enzyme OS=Homo sapiens GN=ME1 PE=1 SV=1	0	0	55	27	415	27	1	572	64.1	6.13	8790	400.43	27	12	0	5.12992e+08	5.39179e+08	5.11866e+08	8.17773e+08	8.09654e+08	8.08012e+08	8.05236e+08	7.74908e+08	7.53866e+08
High	High	Master Protein	O75362	Zinc finger protein 217 OS=Homo sapiens GN=ZNF217 PE=1 SV=1	0	0	47	34	315	34	1	1048	115.2	8.48	8522	400.05	33	18	0	1.02618e+08	1.31943e+08	1.03588e+08	1.22139e+08	1.29328e+08	1.12259e+08	1.35566e+08	1.20415e+08	1.22068e+08
High	High	Master Protein	Q8IYB3	Serine/arginine repetitive matrix protein 1 OS=Homo sapiens GN=SRRM1 PE=1 SV=2	0	0	19	18	336	18	1	904	102.3	11.84	8160	399.84	17	9	0	2.37485e+08	2.75776e+08	2.63123e+08	3.47589e+08	3.70177e+08	3.75501e+08	2.75637e+08	2.96134e+08	2.53491e+08	Acetyl [N-Term]
High	High	Master Protein	Q16555	Dihydropyrimidinase-related protein 2 OS=Homo sapiens GN=DPYSL2 PE=1 SV=1	0	0	67	27	317	24	1	572	62.3	6.38	7567	399.35	27	14	4	2.81417e+08	2.85271e+08	2.88595e+08	3.26774e+08	3.03749e+08	2.72765e+08	2.97806e+08	2.79234e+08	2.61004e+08
High	High	Master Protein	O95235	Kinesin-like protein KIF20A OS=Homo sapiens GN=KIF20A PE=1 SV=1	0	0	58	37	298	37	1	890	100.2	6.92	7629	398.42	37	22	0	1.03409e+08	1.07402e+08	1.01864e+08	127802642	1.27306e+08	1.33211e+08	4.56598e+07	4.84752e+07	4.60526e+07
High	High	Master Protein	Q13492	Phosphatidylinositol-binding clathrin assembly protein OS=Homo sapiens GN=PICALM PE=1 SV=2	0	0	57	27	342	27	1	652	70.7	7.9	8235	398.08	27	13	0	2.93159e+08	2.96621e+08	2.76288e+08	3.62572e+08	3.90891e+08	3.65045e+08	3.90973e+08	3.8576e+08	3.38938e+08	Acetyl [N-Term]
High	High	Master Protein	Q9BZK7	F-box-like/WD repeat-containing protein TBL1XR1 OS=Homo sapiens GN=TBL1XR1 PE=1 SV=1	0	0	52	17	233	12	1	514	55.6	5.55	5917	397.91	17	13	0	8.12658e+07	7.58748e+07	7.08928e+07	6.68601e+07	7.35666e+07	7.18317e+07	7.92954e+07	7.39463e+07	8.86406e+07	Acetyl [N-Term]
High	High	Master Protein	P50748	Kinetochore-associated protein 1 OS=Homo sapiens GN=KNTC1 PE=1 SV=1	0	0	32	60	430	60	1	2209	250.6	5.97	9625	397.15	58	23	0	2.42087e+08	2.46535e+08	2.38092e+08	2.41299e+08	2.57014e+08	2.45128e+08	1.64899e+08	1.74729e+08	1.73635e+08
High	High	Master Protein	Q16630	Cleavage and polyadenylation specificity factor subunit 6 OS=Homo sapiens GN=CPSF6 PE=1 SV=2	0	0	22	12	319	12	1	551	59.2	7.15	7624	397.08	12	9	0	4.87785e+08	5.2933e+08	4.95673e+08	6.2151e+08	6.62836e+08	6.35595e+08	5.43288e+08	5.23012e+08	4.99628e+08
High	High	Master Protein	Q92922	SWI/SNF complex subunit SMARCC1 OS=Homo sapiens GN=SMARCC1 PE=1 SV=3	0	0	49	52	559	41	1	1105	122.8	5.76	14718	397.01	51	23	1	2.53522e+08	2.53703e+08	2.33364e+08	2.96318e+08	3.37471e+08	314478553	2.27326e+08	2.40662e+08	2.19719e+08	Acetyl [N-Term; N-Term]
High	High	Master Protein	Q96DH6	RNA-binding protein Musashi homolog 2 OS=Homo sapiens GN=MSI2 PE=1 SV=1	0	0	56	14	305	11	1	328	35.2	8.48	7666	396.96	13	10	3	2.02709e+08	1.8441e+08	1.94922e+08	2.58971e+08	2.53702e+08	2.57977e+08	2.26526e+08	2.15489e+08	2.23214e+08	Acetyl [N-Term]
High	High	Master Protein	Q658Y4	Protein FAM91A1 OS=Homo sapiens GN=FAM91A1 PE=1 SV=3	0	0	42	26	284	26	1	838	93.9	6.39	6606	396.84	26	15	0	1.80971e+08	1.79574e+08	1.6805e+08	2.19646e+08	2.25401e+08	2.15501e+08	1.82572e+08	1.82654e+08	1.70914e+08
High	High	Master Protein	Q14498	RNA-binding protein 39 OS=Homo sapiens GN=RBM39 PE=1 SV=2	0	0	49	21	397	18	1	530	59.3	10.1	10679	396.66	21	13	3	6.34398e+08	5.94267e+08	5.71511e+08	7.17469e+08	7.54821e+08	7.69401e+08	6.51547e+08	6.00494e+08	5.97983e+08	Acetyl [N-Term]
High	High	Master Protein	Q15427	Splicing factor 3B subunit 4 OS=Homo sapiens GN=SF3B4 PE=1 SV=1	0	0	28	8	267	8	1	424	44.4	8.56	6009	396.49	8	6	0	1.18162e+08	1.47376e+08	1.33893e+08	1.90084e+08	1.96555e+08	1.38332e+08	1.38964e+08	1.34528e+08	1.45527e+08	Acetyl [N-Term]
High	High	Master Protein	P46108	Adapter molecule crk OS=Homo sapiens GN=CRK PE=1 SV=2	0	0	69	18	311	18	1	304	33.8	5.55	6582	396.41	18	11	0	3.2119e+08	2.9741e+08	3.23825e+08	3.69063e+08	4.24105e+08	3.93148e+08	3.56278e+08	3.97936e+08	3.49682e+08	Acetyl [N-Term]
High	High	Master Protein	Q8WWY3	U4/U6 small nuclear ribonucleoprotein Prp31 OS=Homo sapiens GN=PRPF31 PE=1 SV=2	0	0	57	23	298	23	1	499	55.4	5.78	6031	396.35	22	12	0	3.06648e+08	3.40353e+08	3.22212e+08	3.84618e+08	4.12276e+08	3.92019e+08	3.21726e+08	3.39492e+08	3.11015e+08
High	High	Master Protein	Q9BUH6	Protein PAXX OS=Homo sapiens GN=C9orf142 PE=1 SV=2	0	0	71	13	232	13	1	204	21.6	5.48	6609	395.68	13	10	0	1.0486e+08	1.0196e+08	1.01396e+08	1.34796e+08	1.33472e+08	1.31686e+08	1.24209e+08	1.31955e+08	1.10468e+08	Acetyl [N-Term]
High	High	Master Protein	Q01780	Exosome component 10 OS=Homo sapiens GN=EXOSC10 PE=1 SV=2	0	0	60	42	384	42	1	885	100.8	8.46	7122	395.67	39	22	0	2.95847e+08	2.94733e+08	2.68383e+08	3.22714e+08	3.21133e+08	3.19934e+08	2.51608e+08	2.5693e+08	2.53041e+08
High	High	Master Protein	Q9Y281	Cofilin-2 OS=Homo sapiens GN=CFL2 PE=1 SV=1	0	0	75	14	391	9	1	166	18.7	7.88	8769	395.58	14	8	0	1.84684e+08	2.10028e+08	1.80496e+08	2.71117e+08	2.8119e+08	2.66411e+08	2.77561e+08	2.38476e+08	2.47994e+08	Acetyl [N-Term]
High	High	Master Protein	Q9NX02	NACHT, LRR and PYD domains-containing protein 2 OS=Homo sapiens GN=NLRP2 PE=1 SV=1	0	0	41	38	391	38	1	1062	120.4	6.07	8615	395.17	36	18	0	2.23898e+08	2.28065e+08	2.22789e+08	2.8519e+08	2.98042e+08	3.03012e+08	2.88431e+08	2.76358e+08	2.7478e+08
High	High	Master Protein	Q99447	Ethanolamine-phosphate cytidylyltransferase OS=Homo sapiens GN=PCYT2 PE=1 SV=1	0	0	58	20	309	20	1	389	43.8	6.92	8695	394.99	20	11	0	2.74552e+08	2.91682e+08	2.58116e+08	3.24598e+08	3.42853e+08	3.18718e+08	3.14409e+08	3.02843e+08	2.97133e+08
High	High	Master Protein	Q9UMZ2	Synergin gamma OS=Homo sapiens GN=SYNRG PE=1 SV=2	0	0	36	34	310	34	1	1314	140.6	5.03	7087	394.7	32	18	0	7.98083e+07	7.65886e+07	7.59404e+07	9.30463e+07	1.00731e+08	1.03051e+08	9.77205e+07	1.07396e+08	9.97679e+07
High	High	Master Protein	O75410	Transforming acidic coiled-coil-containing protein 1 OS=Homo sapiens GN=TACC1 PE=1 SV=2	0	0	53	32	345	29	1	805	87.7	4.88	8450	394.5	32	15	0	1.0102e+08	9.51178e+07	1.02825e+08	1.62547e+08	1.63091e+08	1.65244e+08	1.26661e+08	1.32049e+08	1.32981e+08
High	High	Master Protein	P45973	Chromobox protein homolog 5 OS=Homo sapiens GN=CBX5 PE=1 SV=1	0	0	61	13	338	12	1	191	22.2	5.86	7417	394.5	13	8	1	3.99786e+08	4.40664e+08	3.99281e+08	6.14675e+08	6.21161e+08	6.5022e+08	5.68182e+08	5.87848e+08	5.36566e+08
High	High	Master Protein	Q9NYL9	Tropomodulin-3 OS=Homo sapiens GN=TMOD3 PE=1 SV=1	0	0	61	18	319	15	1	352	39.6	5.19	7238	393.96	18	10	3	3.49245e+08	3.72283e+08	3.44049e+08	4.95557e+08	4.47861e+08	4.83744e+08	3.54736e+08	3.42748e+08	3.63074e+08
High	High	Master Protein	Q9UI10	Translation initiation factor eIF-2B subunit delta OS=Homo sapiens GN=EIF2B4 PE=1 SV=2	0	0	57	22	316	22	1	523	57.5	9.38	7202	393.92	21	13	0	1.26565e+08	1.36324e+08	1.33614e+08	1.85244e+08	1.94696e+08	1.84274e+08	1.66189e+08	1.73855e+08	1.74451e+08
High	High	Master Protein	Q9HBR0	Putative sodium-coupled neutral amino acid transporter 10 OS=Homo sapiens GN=SLC38A10 PE=1 SV=2	0	0	41	40	300	40	1	1119	119.7	5.73	7341	393.66	38	21	0	8.3155e+07	8.17725e+07	8.01382e+07	9.48389e+07	8.99345e+07	9.66735e+07	8.78052e+07	9.15677e+07	9.87718e+07
High	High	Master Protein	Q5JSH3	WD repeat-containing protein 44 OS=Homo sapiens GN=WDR44 PE=1 SV=1	0	0	56	42	361	42	1	913	101.3	5.45	8449	393.39	40	22	0	1.8274e+08	1.92544e+08	1.89474e+08	2.59245e+08	263723929	2.703e+08	2.30766e+08	2.39923e+08	2.29934e+08
High	High	Master Protein	O60256	Phosphoribosyl pyrophosphate synthase-associated protein 2 OS=Homo sapiens GN=PRPSAP2 PE=1 SV=1	0	0	58	17	284	15	1	369	40.9	7.44	6251	393.24	17	9	3	2.7755e+08	2.83274e+08	2.83541e+08	3.55634e+08	3.7621e+08	3.67714e+08	3.08595e+08	3.25188e+08	306115386
High	High	Master Protein	Q8NBS9	Thioredoxin domain-containing protein 5 OS=Homo sapiens GN=TXNDC5 PE=1 SV=2	0	0	49	16	350	16	1	432	47.6	5.97	8801	393.16	16	6	0	7.03848e+08	6.76685e+08	6.69568e+08	8.6329e+08	9.10806e+08	9.13558e+08	7.4145e+08	7.43109e+08	7.22204e+08
High	High	Master Protein	Q10570	Cleavage and polyadenylation specificity factor subunit 1 OS=Homo sapiens GN=CPSF1 PE=1 SV=2	0	0	36	39	323	39	1	1443	160.8	6.4	7708	392.59	37	20	0	1.38162e+08	1.34927e+08	1.22847e+08	1.60429e+08	1.59553e+08	1.6586e+08	1.34158e+08	1.35336e+08	1.36411e+08
High	High	Master Protein	Q92620	Pre-mRNA-splicing factor ATP-dependent RNA helicase PRP16 OS=Homo sapiens GN=DHX38 PE=1 SV=2	0	0	43	47	440	47	1	1227	140.4	6.54	11315	392.57	47	22	0	1.75289e+08	1.77798e+08	1.65945e+08	2.02404e+08	2.1632e+08	2.14455e+08	2.0592e+08	2.08347e+08	2.01518e+08	Acetyl [N-Term]
High	High	Master Protein	O43823	A-kinase anchor protein 8 OS=Homo sapiens GN=AKAP8 PE=1 SV=1	0	0	51	26	283	26	1	692	76.1	5.15	7054	392.47	24	15	0	9.66426e+07	1.02983e+08	1.00614e+08	1.10828e+08	1.14879e+08	1.18272e+08	1.06552e+08	1.14325e+08	9.89212e+07
High	High	None	Q2VIR3	Putative eukaryotic translation initiation factor 2 subunit 3-like protein OS=Homo sapiens GN=EIF2S3L PE=5 SV=2	0	0	41	18	519	18	1	472	51.2	8.4	13261	391.67	18	7	0	1.41247e+09	1.66891e+09	1.52648e+09	2.15838e+09	2.26845e+09	2.13743e+09	1.91557e+09	1.91221e+09	1.87741e+09	Acetyl [N-Term]
High	High	Master Protein	Q99471	Prefoldin subunit 5 OS=Homo sapiens GN=PFDN5 PE=1 SV=2	0	0	80	12	337	12	1	154	17.3	6.33	7537	390.89	11	6	0	3.63182e+08	3.72507e+08	3.40224e+08	4.60004e+08	4.67721e+08	4.75216e+08	4.53309e+08	4.9572e+08	4.01632e+08	Acetyl [N-Term]
High	High	Master Protein	Q7Z2T5	TRMT1-like protein OS=Homo sapiens GN=TRMT1L PE=1 SV=2	0	0	50	27	337	27	1	733	81.7	7.88	7958	390.08	26	14	0	1.35915e+08	1.37088e+08	1.34603e+08	1.57502e+08	1.65737e+08	1.63463e+08	1.4456e+08	1.47133e+08	1.42733e+08	Acetyl [N-Term]
High	High	Master Protein	Q2NKX8	DNA excision repair protein ERCC-6-like OS=Homo sapiens GN=ERCC6L PE=1 SV=1	0	0	42	36	306	36	1	1250	141	5.31	6842	389.89	36	20	0	9.78984e+07	9.61693e+07	9.37779e+07	8.41502e+07	8.53731e+07	8.68622e+07	5.57057e+07	5.22056e+07	5.32574e+07
High	High	Master Protein	Q8N0W3	L-fucose kinase OS=Homo sapiens GN=FUK PE=2 SV=2	0	0	37	29	266	29	1	1084	117.5	6.25	5054	389.44	28	17	0	8.50951e+07	9.13921e+07	8.6108e+07	1.17298e+08	1.22408e+08	1.1927e+08	1.09418e+08	1.16687e+08	1.12226e+08
High	High	Master Protein	P35613	Basigin OS=Homo sapiens GN=BSG PE=1 SV=2	0	0	34	10	275	10	1	385	42.2	5.66	5879	388.82	10	5	0	3.49333e+08	3.83273e+08	3.48706e+08	525131753	5.21743e+08	4.92874e+08	4.66902e+08	4.46436e+08	4.19783e+08
High	High	Master Protein	O15164	Transcription intermediary factor 1-alpha OS=Homo sapiens GN=TRIM24 PE=1 SV=3	0	0	52	37	342	34	1	1050	116.8	7.11	7597	388.81	36	21	0	1.07787e+08	1.09801e+08	1.07108e+08	1.2552e+08	1.3064e+08	1.29483e+08	1.3201e+08	1.34219e+08	1.34316e+08
High	High	Master Protein	P47756	F-actin-capping protein subunit beta OS=Homo sapiens GN=CAPZB PE=1 SV=4	0	0	53	15	539	15	1	277	31.3	5.59	14653	388.5	15	9	0	1.03712e+09	1.07378e+09	9.90107e+08	1.23005e+09	1.22677e+09	1.18784e+09	1.1678e+09	1.12525e+09	1.17591e+09	Acetyl [N-Term]
High	High	Master Protein	Q9Y4W6	AFG3-like protein 2 OS=Homo sapiens GN=AFG3L2 PE=1 SV=2	0	0	50	40	425	39	1	797	88.5	8.66	9197	388.31	39	15	1	6.00857e+08	5.86684e+08	5.37646e+08	6.7349e+08	7.04305e+08	6.95278e+08	6.22798e+08	5.91935e+08	6.11736e+08
High	High	Master Protein	Q96RL7	Vacuolar protein sorting-associated protein 13A OS=Homo sapiens GN=VPS13A PE=1 SV=2	0	0	26	63	398	63	1	3174	360	6.33	8324	388.15	63	26	0	9.12119e+07	9.76097e+07	9.33056e+07	1.27933e+08	1.17801e+08	1.17923e+08	1.16139e+08	1.09417e+08	1.13006e+08
High	High	Master Protein	Q04323	UBX domain-containing protein 1 OS=Homo sapiens GN=UBXN1 PE=1 SV=2	0	0	64	25	317	25	1	297	33.3	5.25	8083	388.04	25	10	0	2.84355e+08	2.63647e+08	2.30835e+08	3.13493e+08	3.10869e+08	3.15574e+08	2.85232e+08	2.62375e+08	2.59883e+08	Acetyl [N-Term]
High	High	Master Protein	Q9UI12	V-type proton ATPase subunit H OS=Homo sapiens GN=ATP6V1H PE=1 SV=1	0	0	61	24	332	24	1	483	55.8	6.48	6743	387.96	24	13	0	2.83808e+08	2.93642e+08	3.053e+08	4.04349e+08	3.96864e+08	4.15842e+08	3.85915e+08	3.71068e+08	3.77174e+08
High	High	Master Protein	Q96KQ7	Histone-lysine N-methyltransferase EHMT2 OS=Homo sapiens GN=EHMT2 PE=1 SV=3	0	0	42	36	349	35	1	1210	132.3	5.45	7883	387.58	34	19	0	1.26725e+08	137409965	1.3839e+08	1.6083e+08	1.73215e+08	1.69707e+08	1.43847e+08	1.57858e+08	1.6081e+08	Acetyl [N-Term]
High	High	Master Protein	Q9NY27	Serine/threonine-protein phosphatase 4 regulatory subunit 2 OS=Homo sapiens GN=PPP4R2 PE=1 SV=3	0	0	68	19	284	19	1	417	46.9	4.54	6325	387.43	19	17	0	1.26382e+08	1.3242e+08	1.18739e+08	1.41937e+08	1.49877e+08	1.40985e+08	1.36385e+08	1.32845e+08	1.45782e+08
High	High	Master Protein	P62244	40S ribosomal protein S15a OS=Homo sapiens GN=RPS15A PE=1 SV=2	0	0	62	10	330	10	1	130	14.8	10.13	7009	386.74	10	4	0	1.90342e+09	1.85727e+09	1.88135e+09	2.23113e+09	2.24858e+09	2.24854e+09	1.94388e+09	2.03264e+09	2.00179e+09
High	High	Master Protein	Q92917	G patch domain and KOW motifs-containing protein OS=Homo sapiens GN=GPKOW PE=1 SV=2	0	0	66	24	281	24	1	476	52.2	6.15	6461	386.31	23	14	0	1.32127e+08	1.28249e+08	1.30943e+08	1.48744e+08	1.5484e+08	1.63793e+08	1.10303e+08	1.15163e+08	1.07141e+08
High	High	Master Protein	Q5QJE6	Deoxynucleotidyltransferase terminal-interacting protein 2 OS=Homo sapiens GN=DNTTIP2 PE=1 SV=2	0	0	49	31	353	31	1	756	84.4	6.16	8480	386.27	30	16	0	2.20498e+08	2.35151e+08	2.21247e+08	2.74888e+08	2.86025e+08	2.76812e+08	2.56773e+08	2.61458e+08	2.60575e+08
High	High	Master Protein	Q6IA86	Elongator complex protein 2 OS=Homo sapiens GN=ELP2 PE=1 SV=2	0	0	53	31	308	31	1	826	92.4	5.96	6487	385.76	30	16	0	1.81476e+08	1.78205e+08	1.72415e+08	208344398	2.05447e+08	2.1399e+08	2.21105e+08	2.31565e+08	222763271	Acetyl [N-Term]
High	High	Master Protein	Q96EE3	Nucleoporin SEH1 OS=Homo sapiens GN=SEH1L PE=1 SV=3	0	0	69	20	304	20	1	360	39.6	8.09	7185	385.74	20	11	0	2.5105e+08	2.48754e+08	2.32887e+08	2.91751e+08	2.81352e+08	2.88384e+08	2.63009e+08	272005237	2.64144e+08
High	High	Master Protein	P43897	Elongation factor Ts, mitochondrial OS=Homo sapiens GN=TSFM PE=1 SV=2	0	0	64	17	329	17	1	325	35.4	8.38	6696	385.69	17	9	0	3.17527e+08	3.20152e+08	3.27906e+08	4.16519e+08	4.3889e+08	4.45343e+08	3.80128e+08	3.93261e+08	3.86448e+08
High	High	Master Protein	Q92878	DNA repair protein RAD50 OS=Homo sapiens GN=RAD50 PE=1 SV=1	0	0	48	64	520	64	1	1312	153.8	6.89	12363	385.53	64	23	0	5.55906e+08	5.53614e+08	5.23296e+08	6.36303e+08	6.90975e+08	6.56666e+08	5.91793e+08	6.12409e+08	5.85771e+08
High	High	Master Protein	Q15833	Syntaxin-binding protein 2 OS=Homo sapiens GN=STXBP2 PE=1 SV=2	0	0	60	30	347	29	1	593	66.4	6.55	8432	385.52	30	14	1	2.33283e+08	2.49015e+08	2.39477e+08	3.14815e+08	3.21119e+08	3.26734e+08	3.0325e+08	3.06951e+08	2.98619e+08
High	High	Master Protein	Q14558	Phosphoribosyl pyrophosphate synthase-associated protein 1 OS=Homo sapiens GN=PRPSAP1 PE=1 SV=2	0	0	58	16	279	14	1	356	39.4	7.2	6556	385.32	16	12	0	1.56211e+08	1.53334e+08	1.4474e+08	1.85712e+08	1.78629e+08	1.85056e+08	1.62514e+08	1.53399e+08	1.5708e+08
High	High	Master Protein	Q9UGU0	Transcription factor 20 OS=Homo sapiens GN=TCF20 PE=1 SV=3	0	0	33	39	264	39	1	1960	211.6	9.04	6289	384.91	36	24	0	2.93887e+07	3.01916e+07	2.76639e+07	4.00329e+07	3.90137e+07	4.40864e+07	2.66842e+07	2.90147e+07	2.66867e+07
High	High	Master Protein	Q1ED39	Lysine-rich nucleolar protein 1 OS=Homo sapiens GN=KNOP1 PE=1 SV=1	0	0	57	25	259	25	1	458	51.6	9.86	6047	384.8	24	16	0	1.32096e+08	1.28725e+08	1.22581e+08	1.72558e+08	1.77735e+08	1.88086e+08	2.07999e+08	2.09968e+08	2.14569e+08
High	High	Master Protein	Q02878	60S ribosomal protein L6 OS=Homo sapiens GN=RPL6 PE=1 SV=3	0	0	52	23	486	23	1	288	32.7	10.58	10505	383.96	23	7	0	3.37586e+09	3.83752e+09	3.36344e+09	5.32509e+09	5.64036e+09	5.8506e+09	5.0067e+09	4.87621e+09	5.30175e+09
High	High	Master Protein	O43432	Eukaryotic translation initiation factor 4 gamma 3 OS=Homo sapiens GN=EIF4G3 PE=1 SV=2	0	0	38	57	567	51	1	1585	176.5	5.38	12983	383.35	55	21	0	1.73667e+08	1.82878e+08	1.76502e+08	2.38028e+08	2.53005e+08	2.49646e+08	2.55447e+08	2.58425e+08	2.50758e+08
High	High	Master Protein	Q13523	Serine/threonine-protein kinase PRP4 homolog OS=Homo sapiens GN=PRPF4B PE=1 SV=3	0	0	29	29	369	29	1	1007	116.9	10.26	9027	382.93	28	16	0	2.81984e+08	2.86908e+08	2.75998e+08	3.91711e+08	4.15668e+08	3.8762e+08	3.26248e+08	3.32676e+08	2.94733e+08	Acetyl [N-Term]
High	High	Master Protein	O95819	Mitogen-activated protein kinase kinase kinase kinase 4 OS=Homo sapiens GN=MAP4K4 PE=1 SV=2	0	0	38	42	366	26	1	1239	142	7.46	9254	382.88	42	19	16	1.52434e+08	1.46683e+08	1.46678e+08	1.8234e+08	1.82296e+08	1.62522e+08	1.50839e+08	1.47485e+08	1.48291e+08
High	High	None	A6NEC2	Puromycin-sensitive aminopeptidase-like protein OS=Homo sapiens GN=NPEPPSL1 PE=2 SV=3	0	0	36	18	368	18	1	478	53.7	5.34	8346	382.68	18	8	0	8.2158e+08	8.09455e+08	7.74889e+08	1.0626e+09	1.02578e+09	1.02571e+09	957120373	9.78283e+08	9.49688e+08
High	High	Master Protein	Q9NP58	ATP-binding cassette sub-family B member 6, mitochondrial OS=Homo sapiens GN=ABCB6 PE=1 SV=1	0	0	36	22	270	21	1	842	93.8	8.48	6656	382.56	22	11	1	1.53515e+08	1.53814e+08	1.43301e+08	2.18305e+08	2.22273e+08	2.08927e+08	1.82944e+08	1.79478e+08	1.80666e+08
High	High	Master Protein	Q9NRY4	Rho GTPase-activating protein 35 OS=Homo sapiens GN=ARHGAP35 PE=1 SV=3	0	0	39	45	336	45	1	1499	170.4	6.64	7346	382.37	45	20	0	1.02068e+08	9.9133e+07	9.36361e+07	1.33395e+08	1.466e+08	1.39817e+08	1.35732e+08	1.41377e+08	1.28126e+08
High	High	Master Protein	Q9UBX3	Mitochondrial dicarboxylate carrier OS=Homo sapiens GN=SLC25A10 PE=1 SV=2	0	0	57	14	314	14	1	287	31.3	9.54	7137	382.31	14	8	0	4.1793e+08	4.66267e+08	3.81188e+08	5.26614e+08	5.70754e+08	5.2624e+08	4.55681e+08	4.88458e+08	4.75966e+08
High	High	Master Protein	O43719	HIV Tat-specific factor 1 OS=Homo sapiens GN=HTATSF1 PE=1 SV=1	0	0	53	40	477	40	1	755	85.8	4.4	11529	382.31	40	14	0	2.11566e+08	2.09889e+08	2.17367e+08	2.65871e+08	2.7468e+08	2.66021e+08	2.52701e+08	2.66393e+08	2.58688e+08	Acetyl [N-Term]
High	High	Master Protein	O60832	H/ACA ribonucleoprotein complex subunit 4 OS=Homo sapiens GN=DKC1 PE=1 SV=3	0	0	64	32	415	32	1	514	57.6	9.42	9731	382.12	31	16	0	6.87081e+08	6.83674e+08	6.47806e+08	8.70332e+08	9.01655e+08	8.76673e+08	7.62745e+08	8.19329e+08	7.96918e+08	Acetyl [N-Term]
High	High	Master Protein	O43172	U4/U6 small nuclear ribonucleoprotein Prp4 OS=Homo sapiens GN=PRPF4 PE=1 SV=2	0	0	57	24	343	24	1	522	58.4	7.42	7672	382.09	24	17	0	3.14026e+08	3.10475e+08	3.04029e+08	3.50227e+08	3.5344e+08	3.41986e+08	3.06965e+08	2.92126e+08	2.95879e+08
High	High	Master Protein	P20618	Proteasome subunit beta type-1 OS=Homo sapiens GN=PSMB1 PE=1 SV=2	0	0	57	14	267	14	1	241	26.5	8.13	5564	381.46	14	8	0	7.20881e+08	7.58225e+08	7.10416e+08	8.57796e+08	8.80736e+08	8.7427e+08	9.33716e+08	8.61391e+08	7.76616e+08	Acetyl [N-Term]
High	High	Master Protein	Q6ISB3	Grainyhead-like protein 2 homolog OS=Homo sapiens GN=GRHL2 PE=1 SV=1	0	0	46	25	302	25	1	625	71.1	6.44	7602	381.04	25	13	0	1.63665e+08	1.86591e+08	1.84103e+08	2.43759e+08	2.74195e+08	2.755e+08	1.86789e+08	2.06926e+08	1.9592e+08	Acetyl [N-Term]
High	High	Master Protein	Q96DI7	U5 small nuclear ribonucleoprotein 40 kDa protein OS=Homo sapiens GN=SNRNP40 PE=1 SV=1	0	0	65	17	267	17	1	357	39.3	8.1	6487	380.97	16	10	0	3.15474e+08	3.36648e+08	3.2018e+08	4.89612e+08	4.50328e+08	4.26736e+08	3.96938e+08	3.77937e+08	3.88284e+08
High	High	Master Protein	Q15648	Mediator of RNA polymerase II transcription subunit 1 OS=Homo sapiens GN=MED1 PE=1 SV=4	0	0	40	41	363	41	1	1581	168.4	8.73	8824	380.78	40	21	0	7.22871e+07	7.49922e+07	7.18853e+07	9.42913e+07	9.13614e+07	9.18368e+07	7.95223e+07	8.01461e+07	7.59854e+07
High	High	Master Protein	P53365	Arfaptin-2 OS=Homo sapiens GN=ARFIP2 PE=1 SV=1	0	0	60	15	272	14	1	341	37.8	6.04	5905	379.85	15	7	0	1.12017e+08	1.08103e+08	1.04843e+08	1.60684e+08	1.57296e+08	1.55548e+08	1.34349e+08	1.38353e+08	1.32246e+08
High	High	Master Protein	Q2NL82	Pre-rRNA-processing protein TSR1 homolog OS=Homo sapiens GN=TSR1 PE=1 SV=1	0	0	46	30	375	30	1	804	91.8	7.42	7839	379.13	30	18	0	3.42481e+08	2.81131e+08	3.20929e+08	3.95063e+08	3.67561e+08	3.61833e+08	3.65334e+08	3.48649e+08	3.42534e+08
High	High	Master Protein	O60749	Sorting nexin-2 OS=Homo sapiens GN=SNX2 PE=1 SV=2	0	0	47	24	400	22	1	519	58.4	5.12	10440	378.63	24	14	0	4.78352e+08	4.82634e+08	4.80502e+08	5.93712e+08	5.77573e+08	5.96872e+08	5.00489e+08	4.92582e+08	5.06606e+08
High	High	Master Protein	Q8NHV4	Protein NEDD1 OS=Homo sapiens GN=NEDD1 PE=1 SV=1	0	0	51	23	241	23	1	660	71.9	7.97	5565	378.23	23	16	0	6.16439e+07	6.7266e+07	5.99635e+07	7.29139e+07	7.51511e+07	7.20802e+07	5.36153e+07	5.04135e+07	5.07754e+07
High	High	Master Protein	O60232	Sjoegren syndrome/scleroderma autoantigen 1 OS=Homo sapiens GN=SSSCA1 PE=1 SV=1	0	0	70	10	253	10	1	199	21.5	5.24	5863	377.91	10	6	0	8.63102e+07	9.15328e+07	9.14773e+07	1.11549e+08	1.21799e+08	1.30217e+08	1.29906e+08	1.24945e+08	1.26465e+08	Acetyl [N-Term]
High	High	Master Protein	Q8WVB6	Chromosome transmission fidelity protein 18 homolog OS=Homo sapiens GN=CHTF18 PE=1 SV=1	0	0	44	30	282	29	1	975	107.3	7.21	6396	377.88	29	18	1	9.80289e+07	1.03552e+08	1.05735e+08	1.38144e+08	1.36615e+08	1.41958e+08	8.87131e+07	8.93817e+07	8.66755e+07
High	High	Master Protein	O00264	Membrane-associated progesterone receptor component 1 OS=Homo sapiens GN=PGRMC1 PE=1 SV=3	0	0	63	11	257	10	1	195	21.7	4.7	7658	377.67	11	7	0	2.0468e+08	2.20005e+08	1.82828e+08	2.67718e+08	2.53282e+08	2.40686e+08	2.09026e+08	1.91459e+08	1.88213e+08
High	High	Master Protein	O94925	Glutaminase kidney isoform, mitochondrial OS=Homo sapiens GN=GLS PE=1 SV=1	0	0	51	24	282	23	1	669	73.4	7.77	6337	377.33	22	15	1	1.17616e+08	1.21286e+08	1.24399e+08	1.55987e+08	150327176	1.49804e+08	1.60459e+08	1.52784e+08	1.4656e+08
High	High	Master Protein	O00754	Lysosomal alpha-mannosidase OS=Homo sapiens GN=MAN2B1 PE=1 SV=3	0	0	36	29	301	29	1	1011	113.7	7.28	6150	377.29	28	15	0	2.55009e+08	2.96213e+08	2.66572e+08	3.41538e+08	3.70769e+08	3.79975e+08	3.28033e+08	3.08923e+08	3.24105e+08
High	High	Master Protein	Q9Y696	Chloride intracellular channel protein 4 OS=Homo sapiens GN=CLIC4 PE=1 SV=4	0	0	81	22	309	21	1	253	28.8	5.59	6715	377.12	22	12	2	3.88824e+08	3.46711e+08	3.61527e+08	5.53818e+08	5.3232e+08	5.68465e+08	4.32298e+08	4.71176e+08	4.54206e+08	Acetyl [N-Term]
High	High	Master Protein	O95140	Mitofusin-2 OS=Homo sapiens GN=MFN2 PE=1 SV=3	0	0	46	32	314	31	1	757	86.3	6.98	6613	377.03	32	13	1	1.70722e+08	1.68941e+08	1.61722e+08	2.20322e+08	2.27415e+08	2.39544e+08	1.58616e+08	1.57606e+08	1.51627e+08
High	High	Master Protein	P60510	Serine/threonine-protein phosphatase 4 catalytic subunit OS=Homo sapiens GN=PPP4C PE=1 SV=1	0	0	57	15	230	13	1	307	35.1	5.06	4084	376.99	14	11	0	8.52625e+07	8.62105e+07	8.5464e+07	131837269	1.39109e+08	1.30025e+08	1.21033e+08	1.26403e+08	1.11618e+08	Acetyl [N-Term]
High	High	Master Protein	O94776	Metastasis-associated protein MTA2 OS=Homo sapiens GN=MTA2 PE=1 SV=1	0	0	57	37	394	33	1	668	75	9.66	8750	376.98	37	17	4	4.13151e+08	4.2144e+08	4.10768e+08	4.35996e+08	4.36694e+08	441597817	3.75268e+08	4.13466e+08	3.84163e+08
High	High	Master Protein	Q9Y450	HBS1-like protein OS=Homo sapiens GN=HBS1L PE=1 SV=1	0	0	64	35	374	35	1	684	75.4	6.61	8624	376.61	35	17	0	2.52724e+08	2.69011e+08	2.4489e+08	3.40684e+08	3.47447e+08	3.38208e+08	2.83764e+08	2.8206e+08	2.93779e+08
High	High	Master Protein	Q9UPU5	Ubiquitin carboxyl-terminal hydrolase 24 OS=Homo sapiens GN=USP24 PE=1 SV=3	0	0	31	59	377	59	1	2620	294.2	6.14	8226	376.24	57	20	0	1.06201e+08	1.03702e+08	1.06563e+08	1.33771e+08	1.34541e+08	1.35029e+08	1.34857e+08	1.35861e+08	1.34893e+08
High	High	Master Protein	Q9UBV2	Protein sel-1 homolog 1 OS=Homo sapiens GN=SEL1L PE=1 SV=3	0	0	45	25	306	25	1	794	88.7	5.39	6372	376.09	24	12	0	8.63806e+07	8.00129e+07	8.51275e+07	9.7805e+07	1.03506e+08	1.03418e+08	1.02794e+08	9.90049e+07	1.05026e+08
High	High	Master Protein	Q92552	28S ribosomal protein S27, mitochondrial OS=Homo sapiens GN=MRPS27 PE=1 SV=3	0	0	48	18	324	18	1	414	47.6	6.18	7278	375.85	18	10	0	2.0341e+08	2.029e+08	1.99438e+08	2.38051e+08	2.39966e+08	2.43322e+08	2.27202e+08	2.17512e+08	2.17529e+08
High	High	Master Protein	P52306	Rap1 GTPase-GDP dissociation stimulator 1 OS=Homo sapiens GN=RAP1GDS1 PE=1 SV=3	0	0	43	20	302	20	1	607	66.3	5.31	6984	375.8	20	11	0	1.6492e+08	1.69133e+08	1.66558e+08	2.11937e+08	2.21937e+08	2.07419e+08	2.05615e+08	2.07856e+08	2.08341e+08
High	High	Master Protein	P08195	4F2 cell-surface antigen heavy chain OS=Homo sapiens GN=SLC3A2 PE=1 SV=3	0	0	42	23	272	23	1	630	68	5.01	6591	375.34	22	13	0	2.59461e+08	2.58944e+08	2.53802e+08	4.60914e+08	4.25542e+08	4.54388e+08	320390318	3.31394e+08	3.2397e+08	Acetyl [N-Term]
High	High	Master Protein	Q9NP97	Dynein light chain roadblock-type 1 OS=Homo sapiens GN=DYNLRB1 PE=1 SV=3	0	0	70	5	230	5	1	96	10.9	7.25	4722	374.61	5	4	0	2.06958e+08	2.28702e+08	2.21542e+08	3.26104e+08	3.52993e+08	3.62258e+08	2.85691e+08	2.8107e+08	2.72373e+08	Acetyl [N-Term]
High	High	Master Protein	P62263	40S ribosomal protein S14 OS=Homo sapiens GN=RPS14 PE=1 SV=3	0	0	75	11	296	11	1	151	16.3	10.05	7062	374.13	10	8	0	1.34033e+09	1.50236e+09	1.35683e+09	1.77614e+09	1.79955e+09	1.6822e+09	1.70412e+09	1.72942e+09	1.61297e+09
High	High	Master Protein	Q9Y4W2	Ribosomal biogenesis protein LAS1L OS=Homo sapiens GN=LAS1L PE=1 SV=2	0	0	47	27	302	27	1	734	83	4.73	7312	374.09	27	16	0	1.72251e+08	1.92229e+08	1.7968e+08	2.16962e+08	2.25116e+08	2.0146e+08	1.66955e+08	1.87231e+08	1.64461e+08
High	High	Master Protein	Q9Y5K5	Ubiquitin carboxyl-terminal hydrolase isozyme L5 OS=Homo sapiens GN=UCHL5 PE=1 SV=3	0	0	84	22	376	22	1	329	37.6	5.33	8212	374.06	22	10	0	4.29505e+08	4.2919e+08	4.41536e+08	4.7774e+08	5.29669e+08	5.06255e+08	4.15464e+08	4.35037e+08	4.34256e+08	Acetyl [N-Term]
High	High	Master Protein	Q8WTW3	Conserved oligomeric Golgi complex subunit 1 OS=Homo sapiens GN=COG1 PE=1 SV=1	0	0	41	32	297	32	1	980	108.9	7.31	7511	373.93	32	13	0	1.81976e+08	1.66618e+08	1.64151e+08	2.2009e+08	2.14373e+08	2.30291e+08	2.13356e+08	2.16748e+08	2.08436e+08	Acetyl [N-Term]
High	High	Master Protein	Q68EM7	Rho GTPase-activating protein 17 OS=Homo sapiens GN=ARHGAP17 PE=1 SV=1	0	0	62	34	293	33	1	881	95.4	7.62	6098	373.75	34	19	1	1.32689e+08	1.15031e+08	1.24478e+08	1.69513e+08	1.72387e+08	1.54723e+08	1.42254e+08	1.43987e+08	1.55555e+08
High	High	Master Protein	P49916	DNA ligase 3 OS=Homo sapiens GN=LIG3 PE=1 SV=2	0	0	40	37	371	37	1	1009	112.8	9.01	8526	373.63	37	15	0	2.25552e+08	2.15106e+08	2.11172e+08	2.80593e+08	2.93491e+08	2.94239e+08	2.32735e+08	2.38763e+08	2.30402e+08
High	High	Master Protein	P61106	Ras-related protein Rab-14 OS=Homo sapiens GN=RAB14 PE=1 SV=4	0	0	87	20	324	19	1	215	23.9	6.21	7322	373.42	20	12	1	8.44503e+08	8.68108e+08	8.65576e+08	1.08639e+09	1.0491e+09	1.03693e+09	1.057e+09	9.95255e+08	1.00058e+09	Acetyl [N-Term]
High	High	Master Protein	P49454	Centromere protein F OS=Homo sapiens GN=CENPF PE=1 SV=2	0	0	26	70	364	69	1	3210	367.5	5.07	8105	373.38	68	35	1	7.22629e+07	6.99767e+07	6.87972e+07	1.03233e+08	1.08878e+08	1.15407e+08	6.28027e+07	6.32027e+07	6.21711e+07
High	High	Master Protein	Q13619	Cullin-4A OS=Homo sapiens GN=CUL4A PE=1 SV=3	0	0	56	47	556	34	1	759	87.6	8.13	14931	372.92	47	21	0	4.88644e+08	4.67327e+08	4.45524e+08	6.09393e+08	6.51498e+08	6.3493e+08	6.11404e+08	6.08766e+08	6.05255e+08	Acetyl [N-Term]
High	High	Master Protein	Q9HCN8	Stromal cell-derived factor 2-like protein 1 OS=Homo sapiens GN=SDF2L1 PE=1 SV=2	0	0	78	13	254	13	1	221	23.6	7.03	6447	372.73	13	6	0	2.31532e+08	2.30856e+08	2.16354e+08	2.80857e+08	2.82585e+08	2.66748e+08	2.85353e+08	2.54558e+08	2.47682e+08
High	High	Master Protein	Q96SB4	SRSF protein kinase 1 OS=Homo sapiens GN=SRPK1 PE=1 SV=2	0	0	41	26	336	22	1	655	74.3	6.16	8207	372.5	26	15	3	2.72274e+08	2.75156e+08	2.87586e+08	2.91264e+08	2.94849e+08	3.04776e+08	2.59677e+08	2.53575e+08	2.52868e+08
High	High	Master Protein	Q9Y2Z4	Tyrosine--tRNA ligase, mitochondrial OS=Homo sapiens GN=YARS2 PE=1 SV=2	0	0	58	20	272	20	1	477	53.2	8.98	5344	372.4	19	13	0	1.27487e+08	1.26334e+08	1.27744e+08	1.73829e+08	1.80114e+08	1.65872e+08	1.75797e+08	1.58764e+08	1.52727e+08
High	High	Master Protein	P42285	Superkiller viralicidic activity 2-like 2 OS=Homo sapiens GN=SKIV2L2 PE=1 SV=3	0	0	47	43	476	43	1	1042	117.7	6.52	11059	371.84	41	20	0	4.56941e+08	4.88335e+08	4.56078e+08	5.414e+08	5.77723e+08	5.37972e+08	4.91866e+08	4.73229e+08	4.84237e+08	Acetyl [N-Term]
High	High	Master Protein	Q9H6R4	Nucleolar protein 6 OS=Homo sapiens GN=NOL6 PE=1 SV=2	0	0	35	31	340	31	1	1146	127.5	7.64	7968	371.7	31	16	0	2.74892e+08	2.75102e+08	2.54459e+08	2.79852e+08	3.17105e+08	3.05273e+08	3.15018e+08	3.04047e+08	2.82846e+08
High	High	Master Protein	O43149	Zinc finger ZZ-type and EF-hand domain-containing protein 1 OS=Homo sapiens GN=ZZEF1 PE=1 SV=6	0	0	30	65	404	65	1	2961	330.9	5.95	9041	371.61	62	30	0	9.93062e+07	1.02286e+08	1.01921e+08	1.40982e+08	1.3955e+08	1.383e+08	1.45162e+08	1.46117e+08	1.5121e+08
High	High	Master Protein	Q13144	Translation initiation factor eIF-2B subunit epsilon OS=Homo sapiens GN=EIF2B5 PE=1 SV=3	0	0	46	26	282	26	1	721	80.3	5.08	6170	371.47	26	13	0	1.69303e+08	1.72758e+08	1.94065e+08	2.47314e+08	2.51659e+08	2.47487e+08	2.34142e+08	2.44123e+08	2.30255e+08	Acetyl [N-Term]
High	High	Master Protein	Q9Y277	Voltage-dependent anion-selective channel protein 3 OS=Homo sapiens GN=VDAC3 PE=1 SV=1	0	0	64	15	417	14	1	283	30.6	8.66	9619	370.94	15	8	0	9.34358e+08	8.16464e+08	7.55327e+08	1.02844e+09	9.58921e+08	8.84014e+08	8.922e+08	8.81645e+08	8.84713e+08	Acetyl [N-Term]
High	High	Master Protein	Q8N8S7	Protein enabled homolog OS=Homo sapiens GN=ENAH PE=1 SV=2	0	0	53	40	435	38	1	591	66.5	6.93	10984	370.49	39	18	2	4.14265e+08	4.50545e+08	4.79547e+08	5.43411e+08	6.02164e+08	5.74262e+08	5.2166e+08	6.02002e+08	5.48128e+08	Acetyl [N-Term]
High	High	Master Protein Candidate	P0DJD0	RANBP2-like and GRIP domain-containing protein 1 OS=Homo sapiens GN=RGPD1 PE=2 SV=1	0	0	24	42	448	2	1	1748	196.5	6.14	10873	370.23	42	19	0	785870	890302	802880	1.11336e+06	869010	1.00967e+06	1.33509e+06	1.01155e+06	1.11197e+06
High	High	Master Protein	P0DJD1	RANBP2-like and GRIP domain-containing protein 2 OS=Homo sapiens GN=RGPD2 PE=2 SV=1	0	0	24	42	448	2	1	1756	197.2	6.2	10873	370.23	42	19	0	785870	890302	802880	1.11336e+06	869010	1.00967e+06	1.33509e+06	1.01155e+06	1.11197e+06
High	High	Master Protein	Q9UHG3	Prenylcysteine oxidase 1 OS=Homo sapiens GN=PCYOX1 PE=1 SV=3	0	0	49	19	288	19	1	505	56.6	6.18	7248	370.2	19	11	0	1.57128e+08	1.54495e+08	1.58896e+08	1.7687e+08	1.79157e+08	1.70079e+08	1.65154e+08	166589528	1.59207e+08
High	High	Master Protein	Q2M389	WASH complex subunit 4 OS=Homo sapiens GN=WASHC4 PE=1 SV=2	0	0	38	35	360	35	1	1173	136.3	7.44	9175	370.16	35	16	0	1.9487e+08	1.93751e+08	1.76185e+08	2.46605e+08	2.60764e+08	2.56943e+08	2.30585e+08	2.28532e+08	2.03388e+08	Acetyl [N-Term]
High	High	Master Protein	P51553	Isocitrate dehydrogenase [NAD] subunit gamma, mitochondrial OS=Homo sapiens GN=IDH3G PE=1 SV=1	0	0	41	10	214	10	1	393	42.8	8.5	4425	370.07	10	8	0	1.1923e+08	1.18513e+08	1.1464e+08	1.44773e+08	1.55393e+08	1.51726e+08	1.4563e+08	1.43338e+08	1.49276e+08
High	High	Master Protein Rejected	Q12840	Kinesin heavy chain isoform 5A OS=Homo sapiens GN=KIF5A PE=1 SV=2	0	0	16	18	301	0	0	1032	117.3	5.9	6944	369.48	17	7	0
High	High	Master Protein	P49023	Paxillin OS=Homo sapiens GN=PXN PE=1 SV=3	0	0	51	22	249	22	1	591	64.5	6.19	5855	369.35	20	14	0	1.21354e+08	1.17883e+08	1.16693e+08	1.71452e+08	1.63673e+08	1.60346e+08	1.43814e+08	1.52702e+08	1.43331e+08
High	High	Master Protein	Q92769	Histone deacetylase 2 OS=Homo sapiens GN=HDAC2 PE=1 SV=2	0	0	55	26	415	20	1	488	55.3	5.91	8614	369.25	26	11	9	7.47191e+08	7.25074e+08	7.71694e+08	7.85211e+08	7.89135e+08	8.55086e+08	7.47793e+08	7.64467e+08	7.5525e+08	Acetyl [N-Term]
High	High	Master Protein	O75439	Mitochondrial-processing peptidase subunit beta OS=Homo sapiens GN=PMPCB PE=1 SV=2	0	0	54	21	314	21	1	489	54.3	6.83	8155	368.81	21	12	0	2.42809e+08	2.65868e+08	2.62176e+08	3.53159e+08	3.53344e+08	3.66538e+08	3.26078e+08	3.24351e+08	3.27882e+08
High	High	Master Protein	P23258	Tubulin gamma-1 chain OS=Homo sapiens GN=TUBG1 PE=1 SV=2	0	0	73	23	283	6	1	451	51.1	6.14	6008	368.73	23	16	19	2.26213e+08	2.33765e+08	2.17717e+08	2.67406e+08	2.97776e+08	2.91299e+08	2.36625e+08	2.20729e+08	2.16049e+08
High	High	Master Protein	Q6P3W7	SCY1-like protein 2 OS=Homo sapiens GN=SCYL2 PE=1 SV=1	0	0	40	29	279	29	1	929	103.6	8.22	6383	368.68	28	16	0	1.27482e+08	1.3322e+08	1.24111e+08	1.64941e+08	1.61952e+08	1.56827e+08	1.59891e+08	1.60534e+08	1.52586e+08
High	High	Master Protein	O75396	Vesicle-trafficking protein SEC22b OS=Homo sapiens GN=SEC22B PE=1 SV=4	0	0	52	12	290	12	1	215	24.6	6.92	7197	368.66	12	6	0	5.71454e+08	6.34135e+08	6.16263e+08	7.58892e+08	7.81165e+08	7.8769e+08	6.89563e+08	7.41331e+08	6.48034e+08
High	High	Master Protein	P78316	Nucleolar protein 14 OS=Homo sapiens GN=NOP14 PE=1 SV=3	0	0	37	34	366	34	1	857	97.6	7.58	7600	368.41	34	17	0	1.73838e+08	1.52423e+08	1.5812e+08	1.91919e+08	2.08282e+08	2.1067e+08	1.89472e+08	1.95022e+08	1.92053e+08
High	High	Master Protein	Q86TU7	Histone-lysine N-methyltransferase setd3 OS=Homo sapiens GN=SETD3 PE=1 SV=1	0	0	61	33	368	33	1	594	67.2	5.96	8937	368.19	32	16	0	2.43038e+08	2.58246e+08	2.62983e+08	3.41122e+08	3.47752e+08	3.54938e+08	3.09377e+08	3.11889e+08	3.17289e+08
High	High	Master Protein	O96008	Mitochondrial import receptor subunit TOM40 homolog OS=Homo sapiens GN=TOMM40 PE=1 SV=1	0	0	51	13	271	13	1	361	37.9	7.25	6346	368.15	13	6	0	1.70357e+08	1.54951e+08	1.60951e+08	1.97306e+08	2.04735e+08	2.02563e+08	2.10822e+08	2.14015e+08	1.89133e+08
High	High	Master Protein	Q9NVI7	ATPase family AAA domain-containing protein 3A OS=Homo sapiens GN=ATAD3A PE=1 SV=2	0	0	46	29	432	13	1	634	71.3	8.98	8221	367.58	29	12	16	5.16199e+08	5.46945e+08	5.2684e+08	6.11105e+08	6.18314e+08	6.39647e+08	5.94122e+08	5.67143e+08	5.5848e+08	Acetyl [N-Term]
High	High	Master Protein	P55196	Afadin OS=Homo sapiens GN=AFDN PE=1 SV=3	0	0	40	49	339	48	1	1824	206.7	6.47	8073	367.33	49	22	0	8.63974e+07	9.49064e+07	9.05755e+07	1.13712e+08	1.16375e+08	1.06254e+08	9.83883e+07	9.73608e+07	9.99197e+07
High	High	Master Protein	Q03701	CCAAT/enhancer-binding protein zeta OS=Homo sapiens GN=CEBPZ PE=1 SV=3	0	0	41	33	321	33	1	1054	120.9	5.94	7596	366.76	32	19	0	1.70825e+08	1.93906e+08	1.74879e+08	2.23393e+08	2.30935e+08	2.23944e+08	2.07435e+08	2.10194e+08	2.12138e+08
High	High	Master Protein	Q9Y4P3	Transducin beta-like protein 2 OS=Homo sapiens GN=TBL2 PE=1 SV=1	0	0	59	24	318	24	1	447	49.8	9.44	6758	366.76	24	14	0	1.99165e+08	2.14011e+08	2.16863e+08	3.08421e+08	2.94843e+08	3.17966e+08	2.62772e+08	2.72986e+08	2.99237e+08
High	High	Master Protein	Q9UHI8	A disintegrin and metalloproteinase with thrombospondin motifs 1 OS=Homo sapiens GN=ADAMTS1 PE=1 SV=4	0	0	56	34	369	34	1	967	105.3	6.83	8328	366.57	33	19	0	2.47191e+08	2.16335e+08	2.25132e+08	3.11441e+08	3.23512e+08	3.2195e+08	2.88856e+08	2.77789e+08	2.78487e+08
High	High	Master Protein	O15355	Protein phosphatase 1G OS=Homo sapiens GN=PPM1G PE=1 SV=1	0	0	55	27	340	27	1	546	59.2	4.36	10164	366.07	26	14	0	4.99678e+08	5.25118e+08	5.05876e+08	6.24403e+08	6.60314e+08	6.74497e+08	5.37565e+08	5.54791e+08	5.64037e+08
High	High	Master Protein	P08240	Signal recognition particle receptor subunit alpha OS=Homo sapiens GN=SRPRA PE=1 SV=2	0	0	52	31	326	31	1	638	69.8	8.95	7857	365.94	29	15	0	1.69497e+08	1.86719e+08	1.73703e+08	2.5388e+08	2.5717e+08	2.45061e+08	2.30714e+08	2.4956e+08	2.27186e+08
High	High	Master Protein	Q9NR50	Translation initiation factor eIF-2B subunit gamma OS=Homo sapiens GN=EIF2B3 PE=1 SV=1	0	0	58	24	296	24	1	452	50.2	6.47	6597	365.67	24	11	0	1.96941e+08	2.22411e+08	2.16231e+08	2.66215e+08	2.6057e+08	2.63412e+08	2.58546e+08	2.64406e+08	2.50162e+08	Acetyl [N-Term]
High	High	Master Protein	P62995	Transformer-2 protein homolog beta OS=Homo sapiens GN=TRA2B PE=1 SV=1	0	0	49	15	314	14	1	288	33.6	11.25	6522	365.19	14	6	2	3.37702e+08	3.19479e+08	3.08718e+08	4.03401e+08	4.50424e+08	4.57064e+08	3.84974e+08	4.37196e+08	3.88206e+08	Acetyl [N-Term]
High	High	Master Protein	Q6ZRV2	Protein FAM83H OS=Homo sapiens GN=FAM83H PE=1 SV=3	0	0	41	30	247	30	1	1179	127	6.98	5758	364.9	29	21	0	5.05474e+07	4.61525e+07	4.71795e+07	5.68926e+07	6.15346e+07	6.08341e+07	3.95033e+07	4.01708e+07	4.20097e+07
High	High	Master Protein	P08708	40S ribosomal protein S17 OS=Homo sapiens GN=RPS17 PE=1 SV=2	0	0	63	11	333	10	1	135	15.5	9.85	6984	364.89	11	8	0	1.21394e+09	1.12101e+09	9.56016e+08	1.63884e+09	1.57772e+09	1.52878e+09	1.53399e+09	1.49089e+09	1.46476e+09
High	High	Master Protein	Q9H2J4	Phosducin-like protein 3 OS=Homo sapiens GN=PDCL3 PE=1 SV=1	0	0	72	15	306	15	1	239	27.6	4.84	7977	364.8	15	11	0	1.39751e+08	1.412e+08	1.27652e+08	1.62682e+08	1.76691e+08	1.62673e+08	1.57704e+08	1.71753e+08	1.55477e+08	Acetyl [N-Term]
High	High	Master Protein	O14745	Na(+)/H(+) exchange regulatory cofactor NHE-RF1 OS=Homo sapiens GN=SLC9A3R1 PE=1 SV=4	0	0	70	24	337	24	1	358	38.8	5.77	9096	364.58	22	14	0	7.18002e+08	6.91051e+08	7.17415e+08	9.86415e+08	1.05307e+09	9.90152e+08	8.75293e+08	9.27402e+08	8.70457e+08	Acetyl [N-Term]
High	High	Master Protein	Q96RS6	NudC domain-containing protein 1 OS=Homo sapiens GN=NUDCD1 PE=1 SV=2	0	0	51	20	286	20	1	583	66.7	5.11	5477	364.5	20	14	0	1.39703e+08	146446838	1.30765e+08	1.45219e+08	1.46852e+08	1.44386e+08	1.47976e+08	1.45391e+08	1.41982e+08
High	High	Master Protein	Q86V81	THO complex subunit 4 OS=Homo sapiens GN=ALYREF PE=1 SV=3	0	0	47	12	268	12	1	257	26.9	11.15	6564	364.39	11	5	0	6.15825e+08	5.4613e+08	5.34291e+08	6.92037e+08	7.0057e+08	7.12811e+08	6.80648e+08	7.09308e+08	7.08508e+08
High	High	Master Protein	Q96SI9	Spermatid perinuclear RNA-binding protein OS=Homo sapiens GN=STRBP PE=1 SV=1	0	0	52	41	447	35	1	672	73.6	8.72	9799	364	39	14	0	2.50246e+08	2.70787e+08	2.66789e+08	3.66117e+08	3.72597e+08	3.52966e+08	3.37538e+08	3.2826e+08	3.2572e+08
High	High	Master Protein	P30042	ES1 protein homolog, mitochondrial OS=Homo sapiens GN=C21orf33 PE=1 SV=3	0	0	58	13	310	13	1	268	28.2	8.27	7608	362.48	13	8	0	5.93187e+08	6.08249e+08	5.7759e+08	7.58305e+08	7.95676e+08	7.76415e+08	7.31263e+08	7.54773e+08	7.09983e+08
High	High	Master Protein	P28290	Sperm-specific antigen 2 OS=Homo sapiens GN=SSFA2 PE=1 SV=3	0	0	38	36	320	36	1	1259	138.3	5.19	8928	361.86	35	19	0	1.04078e+08	9.62599e+07	9.06236e+07	1.22387e+08	1.35645e+08	1.35092e+08	7.28586e+07	8.15911e+07	7.484e+07
High	High	Master Protein	Q15691	Microtubule-associated protein RP/EB family member 1 OS=Homo sapiens GN=MAPRE1 PE=1 SV=3	0	0	80	17	345	14	1	268	30	5.14	9566	361.45	15	12	3	6.56953e+08	6.96601e+08	6.92432e+08	9.30381e+08	1.01265e+09	9.88522e+08	8.25149e+08	9.0102e+08	8.33609e+08	Acetyl [N-Term]
High	High	Master Protein	Q9BVJ6	U3 small nucleolar RNA-associated protein 14 homolog A OS=Homo sapiens GN=UTP14A PE=1 SV=1	0	0	60	39	371	28	1	771	87.9	7.87	9193	361.4	39	15	11	2.46272e+08	2.4034e+08	2.44916e+08	2.99942e+08	3.21671e+08	3.21397e+08	3.11593e+08	3.02064e+08	3.01317e+08
High	High	Master Protein	Q5SW79	Centrosomal protein of 170 kDa OS=Homo sapiens GN=CEP170 PE=1 SV=1	0	0	32	35	275	35	1	1584	175.2	7.11	6267	361.37	35	17	0	4.95755e+07	4.90051e+07	5.02322e+07	6.40614e+07	6.20347e+07	5.83553e+07	4.76995e+07	4.60119e+07	5.31098e+07	Acetyl [N-Term]
High	High	Master Protein	O15550	Lysine-specific demethylase 6A OS=Homo sapiens GN=KDM6A PE=1 SV=2	0	0	41	36	326	28	1	1401	154.1	7.44	8380	360.97	36	18	8	8.33668e+07	8.79976e+07	8.87862e+07	1.15688e+08	1.0669e+08	1.10821e+08	1.01398e+08	1.0124e+08	9.64821e+07
High	High	Master Protein	Q9Y6N5	Sulfide:quinone oxidoreductase, mitochondrial OS=Homo sapiens GN=SQRDL PE=1 SV=1	0	0	61	24	294	24	1	450	49.9	9.11	6616	360.65	24	14	0	2.50864e+08	2.79767e+08	2.62312e+08	3.26722e+08	3.33328e+08	3.32297e+08	2.77026e+08	2.76489e+08	2.73214e+08
High	High	Master Protein	Q9UPT8	Zinc finger CCCH domain-containing protein 4 OS=Homo sapiens GN=ZC3H4 PE=1 SV=3	0	0	39	31	336	31	1	1303	140.2	6.27	8324	360.58	31	17	0	1.16262e+08	1.14414e+08	1.0019e+08	1.13963e+08	1.25781e+08	1.23705e+08	1.1594e+08	1.20338e+08	1.16222e+08
High	High	Master Protein	Q9H9B4	Sideroflexin-1 OS=Homo sapiens GN=SFXN1 PE=1 SV=4	0	0	53	16	337	14	1	322	35.6	9.07	7661	360.58	16	7	2	7.04134e+08	7.00822e+08	6.53007e+08	8.28968e+08	8.93668e+08	8.99687e+08	6.30614e+08	6.08933e+08	6.38563e+08
High	High	Master Protein	P22694	cAMP-dependent protein kinase catalytic subunit beta OS=Homo sapiens GN=PRKACB PE=1 SV=2	0	0	59	21	335	9	1	351	40.6	8.78	8132	360.37	21	11	12	4.33037e+08	4.45755e+08	4.49123e+08	5.26326e+08	5.56065e+08	5.58543e+08	4.88748e+08	4.80707e+08	4.5938e+08
High	High	Master Protein	Q9Y3P9	Rab GTPase-activating protein 1 OS=Homo sapiens GN=RABGAP1 PE=1 SV=3	0	0	55	47	432	45	1	1069	121.7	5.25	10453	360.28	45	21	3	1.89377e+08	1.99342e+08	1.88191e+08	2.86065e+08	2.87234e+08	2.87148e+08	3.16467e+08	3.26129e+08	3.28502e+08
High	High	Master Protein	Q16539	Mitogen-activated protein kinase 14 OS=Homo sapiens GN=MAPK14 PE=1 SV=3	0	0	67	18	271	17	1	360	41.3	5.78	6386	359.99	18	11	1	1.76451e+08	1.85632e+08	1.92926e+08	2.09028e+08	2.31283e+08	2.20865e+08	1.84111e+08	1.95382e+08	1.89702e+08
High	High	Master Protein	Q15637	Splicing factor 1 OS=Homo sapiens GN=SF1 PE=1 SV=4	0	0	40	19	342	19	1	639	68.3	8.98	8090	359.77	19	11	0	7.66424e+08	7.63297e+08	7.55648e+08	7.34258e+08	836894795	8.18612e+08	7.79961e+08	7.2172e+08	7.68667e+08	Acetyl [N-Term]
High	High	None	P54652	Heat shock-related 70 kDa protein 2 OS=Homo sapiens GN=HSPA2 PE=1 SV=1	0	0	16	11	558	7	1	639	70	5.74	15873	359.58	11	7	0	9.68183e+09	9.45662e+09	1.02039e+10	1.25792e+10	1.25888e+10	1.17866e+10	9275847607	9.83323e+09	1.06429e+10
High	High	Master Protein	Q15717	ELAV-like protein 1 OS=Homo sapiens GN=ELAVL1 PE=1 SV=2	0	0	56	17	354	15	1	326	36.1	9.17	8259	359.56	17	7	2	1.19469e+09	1.26808e+09	1.27023e+09	1.47953e+09	1.44139e+09	1.40035e+09	1.2771e+09	1.31333e+09	1.17852e+09	Acetyl [N-Term]
High	High	Master Protein	Q9NTI5	Sister chromatid cohesion protein PDS5 homolog B OS=Homo sapiens GN=PDS5B PE=1 SV=1	0	0	40	50	454	43	1	1447	164.6	8.47	11135	359.33	50	15	0	1.54394e+08	1.59531e+08	1.55094e+08	2.35101e+08	2.29218e+08	2.35766e+08	1.48586e+08	1.46423e+08	1.52052e+08
High	High	Master Protein	P23634	Plasma membrane calcium-transporting ATPase 4 OS=Homo sapiens GN=ATP2B4 PE=1 SV=2	0	0	26	26	286	14	1	1241	137.8	6.6	6795	359.03	26	13	2	6.9357e+07	7.5766e+07	6.96495e+07	9.26616e+07	9.5996e+07	9.39341e+07	8.08957e+07	8.35108e+07	7.83739e+07
High	High	Master Protein	Q7L5N1	COP9 signalosome complex subunit 6 OS=Homo sapiens GN=COPS6 PE=1 SV=1	0	0	54	13	266	13	1	327	36.1	5.73	5831	358.76	13	8	0	3.96229e+08	3.6109e+08	3.79014e+08	4.2589e+08	4.23814e+08	4.46048e+08	4.40174e+08	3.95045e+08	3.85531e+08
High	High	Master Protein	Q6PI48	Aspartate--tRNA ligase, mitochondrial OS=Homo sapiens GN=DARS2 PE=1 SV=1	0	0	56	28	294	28	1	645	73.5	8.02	5759	358.56	26	13	0	3.47229e+08	3.57774e+08	3.38488e+08	4.81132e+08	4.97298e+08	5.02115e+08	4.17561e+08	4.18835e+08	4.07979e+08
High	High	Master Protein	P46087	Probable 28S rRNA (cytosine(4447)-C(5))-methyltransferase OS=Homo sapiens GN=NOP2 PE=1 SV=2	0	0	47	32	394	32	1	812	89.2	9.23	9352	358.15	32	11	0	3.99228e+08	4.18799e+08	3.79275e+08	5.4697e+08	5.56153e+08	5.56023e+08	5.6934e+08	5.54321e+08	5.56818e+08
High	High	Master Protein	P18124	60S ribosomal protein L7 OS=Homo sapiens GN=RPL7 PE=1 SV=1	0	0	53	19	428	19	1	248	29.2	10.65	9777	357.98	19	10	0	3.31062e+09	3.69485e+09	3.49104e+09	5.12469e+09	4.71299e+09	4.3807e+09	4.4937e+09	4.52622e+09	4.50469e+09
High	High	Master Protein	Q9BXK5	Bcl-2-like protein 13 OS=Homo sapiens GN=BCL2L13 PE=1 SV=1	0	0	63	21	276	21	1	485	52.7	4.44	6198	357.96	21	13	0	9.84047e+07	9.53261e+07	1.05875e+08	1.2545e+08	1.31996e+08	1.2245e+08	1.20351e+08	1.24801e+08	1.16724e+08	Acetyl [N-Term]
High	High	Master Protein	Q6UXN9	WD repeat-containing protein 82 OS=Homo sapiens GN=WDR82 PE=1 SV=1	0	0	59	15	235	15	1	313	35.1	7.69	4546	357.92	15	9	0	1.94137e+08	1.96053e+08	1.84917e+08	2.43545e+08	2.57143e+08	2.64877e+08	2.36146e+08	2.39236e+08	2.22714e+08
High	High	Master Protein	P14735	Insulin-degrading enzyme OS=Homo sapiens GN=IDE PE=1 SV=4	0	0	55	48	478	48	1	1019	117.9	6.61	9921	357.61	47	16	0	6.66004e+08	6.43074e+08	6.59717e+08	7.99646e+08	8.2424e+08	8.33773e+08	7.61335e+08	804045055	7.90915e+08
High	High	Master Protein	Q9NQC3	Reticulon-4 OS=Homo sapiens GN=RTN4 PE=1 SV=2	0	0	16	11	215	11	1	1192	129.9	4.5	4817	357.57	11	9	0	2.55663e+08	2.65362e+08	2.64161e+08	2.89664e+08	2.8451e+08	2.78867e+08	2.62409e+08	2.90892e+08	2.86841e+08	Acetyl [N-Term]
High	High	Master Protein	P00533	Epidermal growth factor receptor OS=Homo sapiens GN=EGFR PE=1 SV=2	0	0	40	34	309	33	1	1210	134.2	6.68	7000	357.56	34	17	1	1.00234e+08	9.99336e+07	9.80468e+07	1.29208e+08	1.21763e+08	1.16998e+08	1.44482e+08	1.44488e+08	1.40228e+08
High	High	Master Protein	Q49AR2	UPF0489 protein C5orf22 OS=Homo sapiens GN=C5orf22 PE=1 SV=2	0	0	47	14	242	14	1	442	49.9	4.78	6535	357.36	13	9	0	1.33457e+08	1.39982e+08	1.43257e+08	1.79461e+08	1.86617e+08	1.7623e+08	1.45529e+08	1.42759e+08	1.4414e+08
High	High	Master Protein	Q9NX55	Huntingtin-interacting protein K OS=Homo sapiens GN=HYPK PE=1 SV=2	0	0	52	8	263	8	1	129	14.7	4.93	6203	357.3	8	5	0	2.71125e+08	2.51379e+08	2.8894e+08	3.08692e+08	3.77089e+08	3.55125e+08	3.17806e+08	3.74458e+08	3.53274e+08
High	High	None	Q13733	Sodium/potassium-transporting ATPase subunit alpha-4 OS=Homo sapiens GN=ATP1A4 PE=1 SV=3	0	0	9	8	260	1	1	1029	114.1	6.64	6739	357.25	8	3	0	5.99231e+08	6.46193e+08	6.03916e+08	9.07405e+08	8.39723e+08	8.59456e+08	8.08906e+08	7.63236e+08	7.64065e+08
High	High	Master Protein	O75976	Carboxypeptidase D OS=Homo sapiens GN=CPD PE=1 SV=2	0	0	30	35	306	35	1	1380	152.8	6.05	7605	357.09	34	15	0	1.0527e+08	1.05499e+08	1.01093e+08	1.21826e+08	1.26103e+08	1.22814e+08	9.28441e+07	9.20075e+07	9.4091e+07
High	High	Master Protein	Q14353	Guanidinoacetate N-methyltransferase OS=Homo sapiens GN=GAMT PE=1 SV=1	0	0	61	10	241	10	1	236	26.3	6.14	5632	357	9	7	0	3.48301e+08	3.35591e+08	3.37916e+08	4.29213e+08	4.01796e+08	3.7765e+08	3.58806e+08	3.56435e+08	3.42862e+08	Acetyl [N-Term]
High	High	Master Protein	Q9C0B1	Alpha-ketoglutarate-dependent dioxygenase FTO OS=Homo sapiens GN=FTO PE=1 SV=3	0	0	64	23	324	23	1	505	58.2	5.22	8347	355.73	23	13	0	2.2468e+08	2.13125e+08	2.07549e+08	2.7583e+08	2.77104e+08	2.92738e+08	2.09563e+08	2.18673e+08	2.13618e+08
High	High	Master Protein	Q9Y4P1	Cysteine protease ATG4B OS=Homo sapiens GN=ATG4B PE=1 SV=2	0	0	50	14	212	14	1	393	44.3	5.07	4669	355.55	14	12	0	7.67922e+07	8.12748e+07	8.54414e+07	8.96442e+07	9.82687e+07	1.00598e+08	1.00954e+08	9.68082e+07	9.64486e+07	Acetyl [N-Term]
High	High	Master Protein	O75223	Gamma-glutamylcyclotransferase OS=Homo sapiens GN=GGCT PE=1 SV=1	0	0	79	13	335	13	1	188	21	5.14	7228	355.23	13	7	0	1.07776e+09	1.05455e+09	1.03888e+09	1.33609e+09	1.46513e+09	1.32894e+09	1.30808e+09	1192086834	1.25071e+09
High	High	Master Protein	Q9BS26	Endoplasmic reticulum resident protein 44 OS=Homo sapiens GN=ERP44 PE=1 SV=1	0	0	51	19	281	18	1	406	46.9	5.26	5979	355.14	19	12	0	5.57556e+08	5.14255e+08	5.46249e+08	6.00104e+08	6.28796e+08	6.43105e+08	6.43253e+08	6.58806e+08	6.28258e+08
High	High	Master Protein	Q13111	Chromatin assembly factor 1 subunit A OS=Homo sapiens GN=CHAF1A PE=1 SV=2	0	0	54	35	297	35	1	956	106.9	5.94	7320	355.02	32	18	0	1.04124e+08	9.87593e+07	9.56051e+07	1.29388e+08	1.35824e+08	1.35546e+08	8.31555e+07	7.94548e+07	7.43046e+07	Acetyl [N-Term]
High	High	Master Protein	O15160	DNA-directed RNA polymerases I and III subunit RPAC1 OS=Homo sapiens GN=POLR1C PE=1 SV=1	0	0	50	12	247	12	1	346	39.2	5.5	6861	354.89	12	6	0	2.0556e+08	2.18e+08	1.99232e+08	2.8078e+08	2.92205e+08	2.56505e+08	2.50495e+08	2.41273e+08	2.4871e+08	Acetyl [N-Term]
High	High	Master Protein	Q96EK5	KIF1-binding protein OS=Homo sapiens GN=KIF1BP PE=1 SV=1	0	0	47	23	268	23	1	621	71.8	5.49	5289	354.81	23	12	0	2.40667e+08	2.61155e+08	2.67757e+08	3.24414e+08	3.18126e+08	3.1574e+08	2.77208e+08	2.67212e+08	2.58351e+08
High	High	Master Protein	Q08945	FACT complex subunit SSRP1 OS=Homo sapiens GN=SSRP1 PE=1 SV=1	0	0	43	27	358	27	1	709	81	6.87	8368	354.62	27	14	0	6.07725e+08	600607093	5.80801e+08	7.46913e+08	7.75375e+08	7.68259e+08	6.1002e+08	5.90741e+08	6.09657e+08	Acetyl [N-Term]
High	High	Master Protein	Q14671	Pumilio homolog 1 OS=Homo sapiens GN=PUM1 PE=1 SV=3	0	0	40	37	424	30	1	1186	126.4	6.84	10026	354.39	37	19	7	2.77919e+08	3.06546e+08	2.82382e+08	3.27381e+08	3.68605e+08	3.46299e+08	3.28954e+08	3.05237e+08	3.09535e+08
High	High	Master Protein	A3KN83	Protein strawberry notch homolog 1 OS=Homo sapiens GN=SBNO1 PE=1 SV=1	0	0	39	38	340	32	1	1393	154.2	7.88	8119	354.23	38	18	6	3.52376e+08	3.57296e+08	3.60109e+08	3.80877e+08	385164915	4.05747e+08	3.95052e+08	3.9338e+08	3.61658e+08
High	High	Master Protein	Q13442	28 kDa heat- and acid-stable phosphoprotein OS=Homo sapiens GN=PDAP1 PE=1 SV=1	0	0	51	12	311	12	1	181	20.6	8.87	8256	353.7	12	5	0	7.55375e+08	6.74796e+08	6.8803e+08	7.73748e+08	8.38275e+08	9.00897e+08	9.69106e+08	9.30903e+08	8.5164e+08
High	High	Master Protein	Q96QC0	Serine/threonine-protein phosphatase 1 regulatory subunit 10 OS=Homo sapiens GN=PPP1R10 PE=1 SV=1	0	0	53	39	392	39	1	940	99	9.17	8258	353.68	37	15	0	2.82014e+08	2.9519e+08	2.8169e+08	3.83353e+08	3.78052e+08	3.83982e+08	3.30512e+08	3.12784e+08	3.2319e+08	Acetyl [N-Term]
High	High	Master Protein	P31323	cAMP-dependent protein kinase type II-beta regulatory subunit OS=Homo sapiens GN=PRKAR2B PE=1 SV=3	0	0	47	17	274	14	1	418	46.3	4.92	6009	353.66	17	12	0	5.95079e+07	5.96249e+07	6.0859e+07	7.81043e+07	7.81226e+07	7.57058e+07	7.16404e+07	7.14154e+07	7.07626e+07
High	High	Master Protein	P00367	Glutamate dehydrogenase 1, mitochondrial OS=Homo sapiens GN=GLUD1 PE=1 SV=2	0	0	56	30	378	30	1	558	61.4	7.8	8030	353.64	30	16	0	6.16245e+08	6.70684e+08	6.30825e+08	8.70749e+08	8.672e+08	8.78933e+08	8.69426e+08	8.41461e+08	8.29936e+08
High	High	Master Protein	Q9BRK5	45 kDa calcium-binding protein OS=Homo sapiens GN=SDF4 PE=1 SV=1	0	0	69	19	295	19	1	362	41.8	4.86	6203	353.59	18	9	0	3.66186e+08	374532484	3.44999e+08	5.40541e+08	5.06888e+08	5.05043e+08	4.60709e+08	4.68492e+08	4.77097e+08
High	High	Master Protein	P42694	Probable helicase with zinc finger domain OS=Homo sapiens GN=HELZ PE=1 SV=2	0	0	29	40	278	40	1	1942	218.8	7.42	6181	353.51	39	19	0	6.1009e+07	6.1526e+07	6.1316e+07	8.56784e+07	8.19646e+07	81425552	7.12348e+07	7.15494e+07	7.5618e+07
High	High	Master Protein	Q8N573	Oxidation resistance protein 1 OS=Homo sapiens GN=OXR1 PE=1 SV=2	0	0	39	22	287	22	1	874	97.9	5.47	8331	353.33	21	17	0	5.91961e+07	6.35926e+07	6.02955e+07	7.55496e+07	83716952	8.32568e+07	5.8852e+07	5.52554e+07	5.58083e+07
High	High	Master Protein	O60524	Nuclear export mediator factor NEMF OS=Homo sapiens GN=NEMF PE=1 SV=4	0	0	29	30	318	30	1	1076	122.9	6.35	7144	353.2	30	11	0	1.46456e+08	1.63935e+08	1.52644e+08	2.09898e+08	2.23507e+08	2.20043e+08	2.15128e+08	2.21738e+08	2.1543e+08
High	High	Master Protein	Q9Y295	Developmentally-regulated GTP-binding protein 1 OS=Homo sapiens GN=DRG1 PE=1 SV=1	0	0	60	20	276	20	1	367	40.5	8.9	6470	353.16	19	11	0	3.21593e+08	3.47784e+08	3.29579e+08	4.29663e+08	4.28332e+08	4.12636e+08	3.88898e+08	3.94039e+08	393639992
High	High	Master Protein	Q99598	Translin-associated protein X OS=Homo sapiens GN=TSNAX PE=1 SV=1	0	0	66	16	273	16	1	290	33.1	6.55	6033	352.8	16	10	0	2.57804e+08	2.3956e+08	2.553e+08	3.25435e+08	3.19352e+08	3.10758e+08	3.21629e+08	3.33522e+08	3.1537e+08
High	High	Master Protein	Q9BQA1	Methylosome protein 50 OS=Homo sapiens GN=WDR77 PE=1 SV=1	0	0	57	12	286	12	1	342	36.7	5.17	6252	352.69	12	10	0	3.40285e+08	3.55751e+08	3.33032e+08	4.23042e+08	4.52253e+08	4.00529e+08	4.76454e+08	4.44867e+08	4.84387e+08
High	High	Master Protein	Q9BX40	Protein LSM14 homolog B OS=Homo sapiens GN=LSM14B PE=1 SV=1	0	0	55	14	229	14	1	385	42	9.69	6010	352.67	14	8	0	9.91508e+07	1.04614e+08	1.0858e+08	1.41516e+08	1.44048e+08	1.3417e+08	1.40344e+08	1.436e+08	1.40319e+08	Acetyl [N-Term]
High	High	Master Protein	Q14738	Serine/threonine-protein phosphatase 2A 56 kDa regulatory subunit delta isoform OS=Homo sapiens GN=PPP2R5D PE=1 SV=1	0	0	48	22	257	15	1	602	69.9	8.13	4355	352.62	22	13	8	3.02239e+08	3.06311e+08	2.83273e+08	3.78213e+08	3.61005e+08	3.57936e+08	3.09907e+08	3.0082e+08	2.97766e+08
High	High	Master Protein	O00192	Armadillo repeat protein deleted in velo-cardio-facial syndrome OS=Homo sapiens GN=ARVCF PE=1 SV=1	0	0	51	33	309	33	1	962	104.6	6.81	7295	352.27	31	18	0	94028629	1.00341e+08	9.43689e+07	1.49511e+08	1.5421e+08	1.44226e+08	1.18907e+08	1.1856e+08	1.14563e+08
High	High	Master Protein	P52735	Guanine nucleotide exchange factor VAV2 OS=Homo sapiens GN=VAV2 PE=1 SV=2	0	0	42	28	255	28	1	878	101.2	7.08	4544	351.99	27	15	0	8.30809e+07	8.71239e+07	80155521	9.63707e+07	1.02447e+08	9.44096e+07	9.20411e+07	9.55629e+07	8.80111e+07
High	High	Master Protein	Q8IWX8	Calcium homeostasis endoplasmic reticulum protein OS=Homo sapiens GN=CHERP PE=1 SV=3	0	0	36	25	311	25	1	916	103.6	9.04	7709	351.81	24	10	0	3.6592e+08	3.4502e+08	3.79191e+08	4.38601e+08	4.52318e+08	4.69846e+08	3.63968e+08	3.95808e+08	3.66573e+08
High	High	Master Protein	Q92615	La-related protein 4B OS=Homo sapiens GN=LARP4B PE=1 SV=3	0	0	44	29	343	29	1	738	80.5	6.92	8142	351.46	29	10	0	2.1885e+08	2.16469e+08	2.06166e+08	2.80056e+08	2.92578e+08	2.97486e+08	2.35177e+08	2.4419e+08	2.25405e+08
High	High	Master Protein	O75340	Programmed cell death protein 6 OS=Homo sapiens GN=PDCD6 PE=1 SV=1	0	0	73	15	266	15	1	191	21.9	5.4	5852	351.33	15	8	0	4.34782e+08	4.33679e+08	4.31725e+08	5.12161e+08	5.75241e+08	5.5936e+08	5.65798e+08	5.73905e+08	5.65976e+08	Acetyl [N-Term]
High	High	Master Protein Rejected	P35609	Alpha-actinin-2 OS=Homo sapiens GN=ACTN2 PE=1 SV=1	0	0	16	14	275	0	0	894	103.8	5.45	5936	351.13	14	11	0
High	High	Master Protein	Q8WVV9	Heterogeneous nuclear ribonucleoprotein L-like OS=Homo sapiens GN=HNRNPLL PE=1 SV=1	0	0	69	28	339	27	1	542	60	7.72	6758	351.11	28	15	0	2.19509e+08	2.20099e+08	2.24149e+08	2.62675e+08	2.74742e+08	2.76866e+08	1.95736e+08	1.98451e+08	1.9563e+08
High	High	Master Protein	Q9BW92	Threonine--tRNA ligase, mitochondrial OS=Homo sapiens GN=TARS2 PE=1 SV=1	0	0	54	28	278	28	1	718	81	7.3	6040	350.99	26	13	0	1.80167e+08	1.96304e+08	1.77505e+08	2.4954e+08	2.39294e+08	2.4452e+08	2.23518e+08	2.25846e+08	2.17503e+08
High	High	Master Protein	P61019	Ras-related protein Rab-2A OS=Homo sapiens GN=RAB2A PE=1 SV=1	0	0	84	18	309	8	1	212	23.5	6.54	6989	350.81	18	10	11	530006514	4.98979e+08	4.98307e+08	6.22681e+08	6.25593e+08	5.95932e+08	5.7248e+08	568375930	5.32299e+08	Acetyl [N-Term]
High	High	Master Protein	Q96T37	Putative RNA-binding protein 15 OS=Homo sapiens GN=RBM15 PE=1 SV=2	0	0	39	31	335	29	1	977	107.1	10.08	7487	350.66	29	15	2	1.55401e+08	1.69182e+08	1.58494e+08	3.3631e+08	3.28042e+08	3.38705e+08	2.7195e+08	2.6448e+08	2.54669e+08
[truncated: 10,082 more rows]

## Sheet: Filtered
Protein FDR Confidence: Mascot	Protein FDR Confidence: Sequest HT	Master	Accession	Description	Exp. q-value: Mascot	Exp. q-value: Sequest HT	Coverage [%]	# Peptides	# PSMs	# Unique Peptides	# Protein Groups	# AAs	MW [kDa]	calc. pI	Score Mascot: Mascot	Score Sequest HT: Sequest HT	# Peptides (by Search Engine): Mascot	# Peptides (by Search Engine): Sequest HT	# Razor Peptides	Abundances (Grouped): NT 1	Abundances (Grouped): NT 2	Abundances (Grouped): NT 3	Abundances (Grouped): 36h Ctrl 1	Abundances (Grouped): 36h Ctrl 2	Abundances (Grouped): 36h Ctrl 3	Abundances (Grouped): 36h KD 1	Abundances (Grouped): 36h KD 2	Abundances (Grouped): 36h KD 3	Modifications
[truncated: 7,009 more rows]

[truncated: 1 more sheets: Normalized]
