# Supplementary material for: The Potential Tumor-Suppressor DHRS7 Inversely Correlates with EGFR Expression in Prostate Cancer Cells and Tumor Samples
Source: Cancers (Basel). 2022 Jun 23;14(13):3074. doi: 10.3390/cancers14133074 (PMC9264982; doi:10.3390/cancers14133074)
Supplement: Supplementary file 1 [file cancers-14-03074-s001.zip › DHRS7_Supplementary_File3.xlsx]

## Sheet: Information
Information:
This file lists the proteins of the proteomics experiment of the 48 h time points.
Sheets:	Original Export:	The complete list originally exported from Proteome Discoverer 2.2.
	Filtered:	The list of proteins filtered as described under the Materials and Methods section.
	Normalized:	List of proteins (filtered) and median normalized by calculating the fold change of the technical replicates (repeated injection/measurement by mass-spectrometry) of Ctrl and KD
		over their respective technical replicate of the NT control (Non-Treated; LNCaP sample not subjected to any treatment), followed by calculating the log2-value and subtracting the median of the proteome signal of the technical replicate.
Headers:	NT	Non-Treated LNCap sample not subjected to any treatment
	Ctrl	siRNA-control sample
	KD	Knock-down of DHRS7
	FC 48h Ctrl/KD 1 over NT 1	Fold change of the abundance of the Ctrl (or KD) sample over the NT sample of the respective technical replicate
	Log2 FC 48h Ctrl/KD 1 over NT 1	Log2 value of the calculated fold change of Ctrl (or KD) over the NT sample of the respective technical replicate
	48h Ctrl/KD 1 (Median Norm)	Median normalized fold change of the calculated fold chage of Ctrl (or KD) over the NT sample of the respective technical replicate (as a Log2-value)

## Sheet: Original Export
Protein FDR Confidence: Mascot	Protein FDR Confidence: Sequest HT	Master	Accession	Description	Exp. q-value: Mascot	Exp. q-value: Sequest HT	Coverage [%]	# Peptides	# PSMs	# Unique Peptides	# Protein Groups	# AAs	MW [kDa]	calc. pI	Score Mascot: Mascot	Score Sequest HT: Sequest HT	# Peptides (by Search Engine): Mascot	# Peptides (by Search Engine): Sequest HT	# Razor Peptides	Abundances (Grouped): NT 1	Abundances (Grouped): NT 2	Abundances (Grouped): NT 3	Abundances (Grouped): 48h Ctrl 1	Abundances (Grouped): 48h Ctrl 2	Abundances (Grouped): 48h Ctrl 3	Abundances (Grouped): 48h KD 1	Abundances (Grouped): 48h KD 2	Abundances (Grouped): 48h KD 3	Modifications
High	High	IsMasterProtein	P04406	Glyceraldehyde-3-phosphate dehydrogenase OS=Homo sapiens GN=GAPDH PE=1 SV=3	0	0	73	21	6923	20	1	335	36	8.46	129325	13073.8	21	15	1	2.78366e+10	2.99658e+10	2.93746e+10	3.71162e+10	3.32529e+10	3.70429e+10	3.6019e+10	3.66978e+10	3.3286e+10
High	High	IsMasterProtein	P68104	Elongation factor 1-alpha 1 OS=Homo sapiens GN=EEF1A1 PE=1 SV=1	0	0	73	30	7980	19	1	462	50.1	9.01	156661	12466.4	30	20	0	1.69385e+10	1.75689e+10	1.64119e+10	1.84692e+10	1.86792e+10	1.87361e+10	2.17547e+10	2.40948e+10	2.26605e+10
High	High	None	Q5VTE0	Putative elongation factor 1-alpha-like 3 OS=Homo sapiens GN=EEF1A1P5 PE=5 SV=1	0	0	59	28	7775	18	1	462	50.2	9.07	153048	12186.1	28	18	0	1.64769e+10	1.70347e+10	1.59788e+10	1.79678e+10	1.83146e+10	1.83141e+10	2.08378e+10	2.32393e+10	2.19016e+10
High	High	IsMasterProtein	Q05639	Elongation factor 1-alpha 2 OS=Homo sapiens GN=EEF1A2 PE=1 SV=1	0	0	75	33	6961	22	1	463	50.4	9.03	132191	11015.1	33	18	13	3.1088e+10	2.61272e+10	2.73549e+10	2.98547e+10	3.28672e+10	3.0515e+10	3.5637e+10	3.4152e+10	3.24605e+10
High	High	IsMasterProtein	P06733	Alpha-enolase OS=Homo sapiens GN=ENO1 PE=1 SV=2	0	0	75	29	6099	24	1	434	47.1	7.39	137348	9324.28	29	19	5	2.07263e+10	2.1024e+10	2.09743e+10	2.40489e+10	2.42725e+10	2.44448e+10	2.35574e+10	2.54192e+10	2.49734e+10
High	High	IsMasterProtein	P10809	60 kDa heat shock protein, mitochondrial OS=Homo sapiens GN=HSPD1 PE=1 SV=2	0	0	78	47	5592	47	1	573	61	5.87	123268	8361.63	47	37	0	1.45598e+10	1.48067e+10	1.44836e+10	1.38531e+10	1.47755e+10	1.46954e+10	1.86256e+10	1.92456e+10	1.88887e+10
High	High	IsMasterProtein	P49327	Fatty acid synthase OS=Homo sapiens GN=FASN PE=1 SV=3	0	0	67	141	6505	140	1	2511	273.3	6.44	150886	7955.11	141	93	1	2.82149e+10	2.90387e+10	2.89608e+10	2.89331e+10	3.0437e+10	2.99458e+10	3.61048e+10	3.75466e+10	3.5038e+10	Acetyl [N-Term]
High	High	IsMasterProtein	P60709	Actin, cytoplasmic 1 OS=Homo sapiens GN=ACTB PE=1 SV=1	0	0	81	29	5386	2	1	375	41.7	5.48	123097	7092.6	29	14	37	3.94136e+10	3.95455e+10	3.89603e+10	3.86664e+10	4.82055e+10	4.19319e+10	4.93022e+10	4.54151e+10	4.99275e+10	Acetyl [N-Term; N-Term]
High	High	IsMasterProtein	P63261	Actin, cytoplasmic 2 OS=Homo sapiens GN=ACTG1 PE=1 SV=1	0	0	81	29	5438	2	1	375	41.8	5.48	124338	7089.49	29	14	0	9.56749e+08	1.01348e+09	9.98389e+08	1.02078e+09	1.12139e+09	9.54081e+08	1.25037e+09	1.19389e+09	1.2139e+09	Acetyl [N-Term; N-Term]
High	High	IsMasterProtein	P35579	Myosin-9 OS=Homo sapiens GN=MYH9 PE=1 SV=4	0	0	69	166	5557	134	1	1960	226.4	5.6	135120	6665.62	166	101	39	1.47443e+10	1.4535e+10	1.45932e+10	1.5499e+10	1.58795e+10	1.62814e+10	1.71587e+10	1.82064e+10	1.7037e+10
High	High	IsMasterProtein	P14618	Pyruvate kinase PKM OS=Homo sapiens GN=PKM PE=1 SV=4	0	0	77	47	4238	46	1	531	57.9	7.84	102694	6021.38	47	32	1	1.74841e+10	1.7768e+10	1.75691e+10	1.8889e+10	1.88457e+10	1.8853e+10	1.89754e+10	1.93797e+10	1.99076e+10	Acetyl [N-Term]
High	High	IsMasterProteinRejected	P68363	Tubulin alpha-1B chain OS=Homo sapiens GN=TUBA1B PE=1 SV=1	0	0	81	31	4527	0	0	451	50.1	5.06	98782	6002.41	30	23	0
High	High	IsMasterProtein	P08238	Heat shock protein HSP 90-beta OS=Homo sapiens GN=HSP90AB1 PE=1 SV=4	0	0	67	56	5176	33	1	724	83.2	5.03	112353	5797.83	56	34	25	4.51971e+10	4.54682e+10	4.5803e+10	4.55267e+10	4.63973e+10	4.57861e+10	4.84086e+10	5.10649e+10	4.70931e+10
High	High	IsMasterProtein	Q71U36	Tubulin alpha-1A chain OS=Homo sapiens GN=TUBA1A PE=1 SV=1	0	0	81	31	3960	2	1	451	50.1	5.06	84375	5531.85	30	23	4	1.5858e+09	1.44917e+09	1.60603e+09	1.5978e+09	1.48865e+09	1.51246e+09	1.55471e+09	1.61651e+09	1.73073e+09
High	High	IsMasterProtein	P68366	Tubulin alpha-4A chain OS=Homo sapiens GN=TUBA4A PE=1 SV=1	0	0	69	28	3866	7	1	448	49.9	5.06	83644	5164.84	28	18	0	2.84186e+09	3.03923e+09	2.87033e+09	2.8765e+09	2.97024e+09	2.77766e+09	2.83636e+09	2.74397e+09	2.87381e+09
High	High	IsMasterProtein	Q14204	Cytoplasmic dynein 1 heavy chain 1 OS=Homo sapiens GN=DYNC1H1 PE=1 SV=5	0	0	60	264	4485	264	1	4646	532.1	6.4	99348	4938.35	264	137	0	5.49434e+09	5.76316e+09	5.69854e+09	5.6334e+09	5.68255e+09	5.84988e+09	7.13502e+09	7.39077e+09	7.02631e+09	Acetyl [N-Term]
High	High	IsMasterProtein	P12277	Creatine kinase B-type OS=Homo sapiens GN=CKB PE=1 SV=1	0	0	82	25	3491	23	1	381	42.6	5.59	79829	4807.3	25	19	3	1.69346e+10	1.68619e+10	1.72027e+10	1.79815e+10	1.75991e+10	1.77732e+10	1.86946e+10	2.0643e+10	1.95281e+10
High	High	IsMasterProtein	P07900	Heat shock protein HSP 90-alpha OS=Homo sapiens GN=HSP90AA1 PE=1 SV=5	0	0	63	49	4046	33	1	732	84.6	5.02	90365	4625.51	49	29	1	7.04041e+09	7.48875e+09	7.25016e+09	8.0324e+09	8.14838e+09	8.0668e+09	6.61142e+09	6.56399e+09	6.20335e+09
High	High	IsMasterProtein	P14625	Endoplasmin OS=Homo sapiens GN=HSP90B1 PE=1 SV=1	0	0	70	55	3117	53	1	803	92.4	4.84	64936	4543.78	54	32	0	9.64665e+09	9.86084e+09	9.61088e+09	1.00452e+10	1.04384e+10	1.08307e+10	1.17244e+10	1.2013e+10	1.22341e+10
High	High	None	Q13748	Tubulin alpha-3C/D chain OS=Homo sapiens GN=TUBA3C PE=1 SV=3	0	0	60	22	3037	1	1	450	49.9	5.1	64558	4527.29	21	17	0	1.54416e+09	1.40499e+09	1.56411e+09	1.54704e+09	1.43754e+09	1.44911e+09	1.49444e+09	1.56356e+09	1.67242e+09
High	High	IsMasterProtein	P07437	Tubulin beta chain OS=Homo sapiens GN=TUBB PE=1 SV=2	0	0	82	31	4395	4	1	444	49.6	4.89	109332	4472.41	31	24	0	4.69768e+09	5.45347e+09	4.7387e+09	5.32872e+09	4.8451e+09	4.81802e+09	5.66638e+09	5.09273e+09	5.44772e+09	Acetyl [N-Term]
High	High	IsMasterProtein	Q9BQE3	Tubulin alpha-1C chain OS=Homo sapiens GN=TUBA1C PE=1 SV=1	0	0	81	31	3498	3	1	449	49.9	5.1	79018	4443.9	30	22	38	2.79885e+10	3.29783e+10	2.68782e+10	2.74919e+10	2.65576e+10	2.80955e+10	2.83009e+10	3.06141e+10	3.10666e+10
High	High	IsMasterProtein	Q00610	Clathrin heavy chain 1 OS=Homo sapiens GN=CLTC PE=1 SV=5	0	0	65	104	3306	85	1	1675	191.5	5.69	75391	4309.15	103	71	22	8.46579e+09	8.92483e+09	8.81506e+09	8.6949e+09	8.86251e+09	9.13933e+09	1.00396e+10	1.06063e+10	9.94557e+09	Acetyl [N-Term]
High	High	None	Q6PEY2	Tubulin alpha-3E chain OS=Homo sapiens GN=TUBA3E PE=1 SV=2	0	0	50	16	2649	1	1	450	49.8	5.14	55842	4059.27	15	12	0	1.54416e+09	1.40499e+09	1.56411e+09	1.54704e+09	1.43754e+09	1.44911e+09	1.49444e+09	1.56356e+09	1.67242e+09
High	High	IsMasterProtein	O75369	Filamin-B OS=Homo sapiens GN=FLNB PE=1 SV=2	0	0	73	155	3274	140	1	2602	278	5.73	74838	4014.76	152	100	17	4.41902e+09	4.61217e+09	4.55165e+09	4.74555e+09	4.86629e+09	4.96524e+09	6.14366e+09	6.23429e+09	5.92593e+09
High	High	IsMasterProtein	P68371	Tubulin beta-4B chain OS=Homo sapiens GN=TUBB4B PE=1 SV=1	0	0	82	32	3990	1	1	445	49.8	4.89	100142	3947.87	32	25	45	3.02968e+10	3.2069e+10	3.15972e+10	3.18699e+10	3.34634e+10	3.23323e+10	3.48778e+10	3.49075e+10	3.4163e+10	Acetyl [N-Term]
High	High	IsMasterProtein	Q9UM54	Unconventional myosin-VI OS=Homo sapiens GN=MYO6 PE=1 SV=4	0	0	68	94	3054	92	1	1294	149.6	8.53	74865	3664.66	93	54	1	7.12178e+09	7.40041e+09	7.21084e+09	6.89619e+09	7.05907e+09	7.46824e+09	7.97349e+09	8.04682e+09	7.6127e+09	Acetyl [N-Term]
High	High	IsMasterProtein	P35580	Myosin-10 OS=Homo sapiens GN=MYH10 PE=1 SV=3	0	0	66	149	2970	117	1	1976	228.9	5.54	71862	3535.75	147	86	10	2.67661e+09	2.80972e+09	2.74077e+09	2.97407e+09	3.00731e+09	3.15755e+09	3.74282e+09	3.89176e+09	3.65165e+09
High	High	IsMasterProtein	Q9Y490	Talin-1 OS=Homo sapiens GN=TLN1 PE=1 SV=3	0	0	67	139	2709	121	1	2541	269.6	6.07	65280	3522.97	138	82	19	1.94802e+09	1.98811e+09	1.93187e+09	2.0935e+09	2.14789e+09	2.19845e+09	2.70215e+09	2.831e+09	2.73049e+09
High	High	IsMasterProtein	Q15149	Plectin OS=Homo sapiens GN=PLEC PE=1 SV=3	0	0	63	310	3794	299	1	4684	531.5	5.96	87983	3380.13	307	130	12	3.53106e+09	3.73424e+09	3.63273e+09	3.86014e+09	3.96523e+09	4.08324e+09	4.70813e+09	4.83558e+09	4.51963e+09
High	High	IsMasterProtein	Q14980	Nuclear mitotic apparatus protein 1 OS=Homo sapiens GN=NUMA1 PE=1 SV=2	0	0	71	143	2674	142	1	2115	238.1	5.78	66572	3369.24	142	89	1	2.89187e+09	2.97074e+09	2.97473e+09	3.03131e+09	3.0937e+09	3.20398e+09	3.16849e+09	3.27174e+09	3.06121e+09
High	High	IsMasterProtein	O43175	D-3-phosphoglycerate dehydrogenase OS=Homo sapiens GN=PHGDH PE=1 SV=4	0	0	61	29	2262	29	1	533	56.6	6.71	50556	3366.51	29	19	0	6.77252e+09	6.79631e+09	6.80366e+09	8.20564e+09	8.00083e+09	8.22238e+09	8.07542e+09	8.54512e+09	7.75744e+09	Acetyl [N-Term]
High	High	IsMasterProtein	P78527	DNA-dependent protein kinase catalytic subunit OS=Homo sapiens GN=PRKDC PE=1 SV=3	0	0	53	214	3540	213	1	4128	468.8	7.12	83653	3310.01	214	97	0	5.48218e+09	5.66788e+09	5.57001e+09	5.1541e+09	5.32302e+09	5.43607e+09	5.12254e+09	5.18001e+09	5038937804
High	High	IsMasterProtein	P04350	Tubulin beta-4A chain OS=Homo sapiens GN=TUBB4A PE=1 SV=2	0	0	82	30	3477	4	1	444	49.6	4.88	88824	3305.63	30	25	2	3.25455e+08	3.35727e+08	3.13694e+08	3.49866e+08	331278981	3.78324e+08	4.70362e+08	4.93161e+08	4.67721e+08	Acetyl [N-Term]
High	High	IsMasterProtein	P07814	Bifunctional glutamate/proline--tRNA ligase OS=Homo sapiens GN=EPRS PE=1 SV=5	0	0	66	99	2756	98	1	1512	170.5	7.33	64005	3275.06	99	55	1	5.63378e+09	5.77195e+09	5.78922e+09	6.49085e+09	6.71128e+09	6.7925e+09	8.29398e+09	8.63903e+09	8.30627e+09	Acetyl [N-Term]
High	High	IsMasterProtein	P49588	Alanine--tRNA ligase, cytoplasmic OS=Homo sapiens GN=AARS PE=1 SV=2	0	0	69	56	2412	56	1	968	106.7	5.53	56546	3175.61	55	35	0	4.59216e+09	4.56568e+09	4.73729e+09	5.273e+09	5.40408e+09	5.49079e+09	5.80125e+09	5.66006e+09	5.43806e+09	Acetyl [N-Term]
High	High	IsMasterProtein	P13639	Elongation factor 2 OS=Homo sapiens GN=EEF2 PE=1 SV=4	0	0	72	70	3043	68	1	858	95.3	6.83	68478	3169.88	69	41	1	1.81062e+10	1.83533e+10	1.83035e+10	1.91268e+10	2.04084e+10	2.04565e+10	2.54621e+10	26161343228	2.46519e+10
High	High	IsMasterProtein	P22314	Ubiquitin-like modifier-activating enzyme 1 OS=Homo sapiens GN=UBA1 PE=1 SV=3	0	0	62	53	2054	53	1	1058	117.8	5.76	46597	3149.29	53	36	0	4.13181e+09	4.43515e+09	4.36679e+09	4.6025e+09	4.67399e+09	4.79805e+09	5.38452e+09	5.45875e+09	5.16668e+09
High	High	IsMasterProtein	P55072	Transitional endoplasmic reticulum ATPase OS=Homo sapiens GN=VCP PE=1 SV=4	0	0	81	67	2435	67	1	806	89.3	5.26	56884	3094.63	67	46	0	7.50162e+09	7.44895e+09	7.29492e+09	7.61943e+09	7.65286e+09	7.59908e+09	9.86401e+09	1.02208e+10	9.61712e+09	Acetyl [N-Term]
High	High	IsMasterProtein	P21333	Filamin-A OS=Homo sapiens GN=FLNA PE=1 SV=4	0	0	66	139	2457	126	1	2647	280.6	6.06	56457	3061.43	135	88	3	2.73498e+09	2.82904e+09	2.83675e+09	2.85963e+09	3.10762e+09	3.09898e+09	3.5134e+09	3.76007e+09	3.53861e+09
High	High	IsMasterProteinRejected	Q9BVA1	Tubulin beta-2B chain OS=Homo sapiens GN=TUBB2B PE=1 SV=1	0	0	80	31	3323	0	0	445	49.9	4.89	84506	3025.51	31	23	0										Acetyl [N-Term]
High	High	IsMasterProtein	P13929	Beta-enolase OS=Homo sapiens GN=ENO3 PE=1 SV=5	0	0	41	14	1833	6	1	434	47	7.71	38314	3007.13	14	9	0	8.94565e+06	8.34877e+06	8.72437e+06	1.20353e+07	9.46312e+06	1.24561e+07	1.29955e+07	1.09101e+07	1.29986e+07
High	High	IsMasterProteinRejected	Q9NY65	Tubulin alpha-8 chain OS=Homo sapiens GN=TUBA8 PE=1 SV=1	0	0	34	16	2255	0	0	449	50.1	5.06	51114	2962.66	16	12	0
High	High	IsMasterProtein	P09104	Gamma-enolase OS=Homo sapiens GN=ENO2 PE=1 SV=3	0	0	69	21	1752	14	1	434	47.2	5.03	35947	2950.69	20	15	3	1.93621e+08	2.00429e+08	1.8862e+08	2.24018e+08	216899580	2.33775e+08	2.41301e+08	2.44364e+08	2.40916e+08
High	High	IsMasterProtein	P05783	Keratin, type I cytoskeletal 18 OS=Homo sapiens GN=KRT18 PE=1 SV=2	0	0	83	41	2086	38	1	430	48	5.45	55933	2918.03	41	18	4	7.95948e+09	8.09703e+09	8.15535e+09	8.10688e+09	8.43748e+09	8.22626e+09	7.87552e+09	8.25187e+09	7.80795e+09
High	High	IsMasterProtein	Q13885	Tubulin beta-2A chain OS=Homo sapiens GN=TUBB2A PE=1 SV=1	0	0	73	31	3244	5	1	445	49.9	4.89	83991	2901.96	31	23	4	2.37282e+09	2.45369e+09	2.48477e+09	2.25847e+09	2.40427e+09	2.56904e+09	2373287209	3.00675e+09	2.6027e+09	Acetyl [N-Term]
High	High	IsMasterProtein	P78371	T-complex protein 1 subunit beta OS=Homo sapiens GN=CCT2 PE=1 SV=4	0	0	83	39	2026	39	1	535	57.5	6.46	48538	2895.27	38	26	0	4.07549e+09	4.45239e+09	4.12445e+09	4.15029e+09	4.37625e+09	4.39405e+09	5.09317e+09	5.21109e+09	4.91465e+09	Acetyl [N-Term]
High	High	IsMasterProtein	P11142	Heat shock cognate 71 kDa protein OS=Homo sapiens GN=HSPA8 PE=1 SV=1	0	0	68	39	2665	34	1	646	70.9	5.52	63909	2873.04	37	25	4	2.50248e+10	2.64564e+10	2.57123e+10	2.53298e+10	2.6351e+10	2.73135e+10	2.78083e+10	3.12174e+10	2.95586e+10
High	High	IsMasterProtein	Q7Z6Z7	E3 ubiquitin-protein ligase HUWE1 OS=Homo sapiens GN=HUWE1 PE=1 SV=3	0	0	51	174	2467	173	1	4374	481.6	5.22	61731	2865.48	172	82	1	1.56848e+09	1.68408e+09	1.62664e+09	1.76752e+09	1.82832e+09	1.85821e+09	2.25665e+09	2.34032e+09	2.27125e+09
High	High	IsMasterProtein	Q13263	Transcription intermediary factor 1-beta OS=Homo sapiens GN=TRIM28 PE=1 SV=5	0	0	74	41	2005	41	1	835	88.5	5.77	47446	2814.36	41	26	0	5.2057e+09	5.35436e+09	5.49999e+09	5.24112e+09	5.50864e+09	5.46197e+09	5.79468e+09	6.19294e+09	5.81606e+09	Acetyl [N-Term]
High	High	IsMasterProtein	P11717	Cation-independent mannose-6-phosphate receptor OS=Homo sapiens GN=IGF2R PE=1 SV=3	0	0	58	124	2297	124	1	2491	274.2	5.94	53515	2789.81	122	75	0	3.09308e+09	3.20487e+09	3.16156e+09	2.9508e+09	3.06178e+09	3.15615e+09	3.72463e+09	3.86628e+09	3.61506e+09
High	High	IsMasterProtein	Q92616	eIF-2-alpha kinase activator GCN1 OS=Homo sapiens GN=GCN1 PE=1 SV=6	0	0	61	148	2645	148	1	2671	292.6	7.47	63668	2739.83	144	76	0	2.90979e+09	3.09966e+09	3.04703e+09	2.97986e+09	3.01561e+09	3.09943e+09	3.28601e+09	3.37333e+09	3.19661e+09	Acetyl [N-Term]
n/a	High	IsMasterProtein	P58107	Epiplakin OS=Homo sapiens GN=EPPK1 PE=1 SV=2		0	52	77	682	70	1	5090	555.3	5.6		2738.39		77	0	6.85185e+07	7.13845e+07	7.1755e+07	5.83342e+07	6.48196e+07	7.38229e+07	9.14245e+07	9.84397e+07	8.99044e+07
High	High	IsMasterProtein	Q13085	Acetyl-CoA carboxylase 1 OS=Homo sapiens GN=ACACA PE=1 SV=2	0	0	62	120	2107	120	1	2346	265.4	6.37	44779	2643.75	120	69	0	2.32709e+09	2.3941e+09	2.36049e+09	2.3104e+09	2.40106e+09	2.37797e+09	2.83709e+09	2.96089e+09	2.75361e+09	Acetyl [N-Term]
High	High	IsMasterProtein	P49792	E3 SUMO-protein ligase RanBP2 OS=Homo sapiens GN=RANBP2 PE=1 SV=2	0	0	66	175	2454	125	1	3224	358	6.2	59700	2598.91	173	92	49	1.55219e+09	1.58596e+09	1.60775e+09	1.6004e+09	1.7128e+09	1.69528e+09	2.03839e+09	2.11923e+09	2.00317e+09
High	High	IsMasterProtein	P62258	14-3-3 protein epsilon OS=Homo sapiens GN=YWHAE PE=1 SV=1	0	0	80	25	2320	22	1	255	29.2	4.74	55693	2564.2	25	16	4	1.5861e+10	1.58685e+10	1.68302e+10	1.66061e+10	1.67311e+10	1.72483e+10	1.97444e+10	1.86946e+10	1.81886e+10	Acetyl [N-Term]
High	High	IsMasterProteinRejected	Q6S8J3	POTE ankyrin domain family member E OS=Homo sapiens GN=POTEE PE=2 SV=3	0	0	10	11	2301	0	0	1075	121.3	6.2	50425	2564.01	11	5	0
High	High	IsMasterProtein	P09651	Heterogeneous nuclear ribonucleoprotein A1 OS=Homo sapiens GN=HNRNPA1 PE=1 SV=5	0	0	67	30	2228	11	1	372	38.7	9.13	60993	2538.96	30	19	18	8.76669e+09	8.74829e+09	8.15182e+09	7.9119e+09	8.03557e+09	8.36682e+09	9.21008e+09	9.21083e+09	8.94658e+09
High	High	IsMasterProtein	P60842	Eukaryotic initiation factor 4A-I OS=Homo sapiens GN=EIF4A1 PE=1 SV=1	0	0	76	31	1870	14	1	406	46.1	5.48	44774	2416.1	30	19	21	8.91929e+09	9.34118e+09	9.18846e+09	8.65342e+09	8.71999e+09	9.09114e+09	1.04344e+10	1.05613e+10	9.78919e+09
High	High	IsMasterProtein	P34932	Heat shock 70 kDa protein 4 OS=Homo sapiens GN=HSPA4 PE=1 SV=4	0	0	80	68	2169	65	1	840	94.3	5.19	49558	2409.95	68	45	4	3.76297e+09	4.01987e+09	4.01617e+09	3.9678e+09	4.2604e+09	4.13588e+09	5.07757e+09	5.0743e+09	4.82355e+09
High	High	IsMasterProtein	P04075	Fructose-bisphosphate aldolase A OS=Homo sapiens GN=ALDOA PE=1 SV=2	0	0	86	32	1775	27	1	364	39.4	8.09	36620	2393.86	32	21	5	9.47747e+09	1.01683e+10	9.60019e+09	1.01892e+10	1.09167e+10	1.07867e+10	1.19852e+10	1.34215e+10	1.21721e+10
High	High	IsMasterProtein	P38646	Stress-70 protein, mitochondrial OS=Homo sapiens GN=HSPA9 PE=1 SV=2	0	0	65	48	1803	48	1	679	73.6	6.16	46767	2339.62	48	28	0	4.4378e+09	4.57869e+09	4.51821e+09	4.60129e+09	4.60328e+09	4.54803e+09	6.45817e+09	6.35889e+09	6.24964e+09
High	High	IsMasterProtein	P11021	78 kDa glucose-regulated protein OS=Homo sapiens GN=HSPA5 PE=1 SV=2	0	0	63	46	1999	44	1	654	72.3	5.16	48866	2335.12	46	28	2	1.13664e+10	1.25559e+10	1.14816e+10	1.31388e+10	1.25088e+10	1.28774e+10	1.40269e+10	1.46616e+10	1.38873e+10
High	High	IsMasterProtein	Q00796	Sorbitol dehydrogenase OS=Homo sapiens GN=SORD PE=1 SV=4	0	0	79	30	1526	30	1	357	38.3	7.97	35242	2322.54	30	16	0	4.23506e+09	4.22827e+09	4.37869e+09	4.21249e+09	4.32859e+09	4.53315e+09	3.90808e+09	3.96412e+09	3.75258e+09	Acetyl [N-Term]
High	High	IsMasterProtein	P06576	ATP synthase subunit beta, mitochondrial OS=Homo sapiens GN=ATP5B PE=1 SV=3	0	0	72	26	1759	26	1	529	56.5	5.4	41134	2297.08	26	22	0	5.61347e+09	5.88051e+09	5.64827e+09	5.52731e+09	5.37714e+09	5.73053e+09	6.79877e+09	7.05795e+09	6.85313e+09
High	High	IsMasterProtein	P60174	Triosephosphate isomerase OS=Homo sapiens GN=TPI1 PE=1 SV=3	0	0	75	20	1574	20	1	286	30.8	5.92	35623	2229.19	20	16	0	1.37053e+10	1.34893e+10	1.48274e+10	1.51045e+10	1.54543e+10	1.64242e+10	1.56457e+10	1.67973e+10	1.71725e+10
High	High	IsMasterProtein	Q08211	ATP-dependent RNA helicase A OS=Homo sapiens GN=DHX9 PE=1 SV=4	0	0	57	59	1678	59	1	1270	140.9	6.84	38263	2190.4	58	34	0	3.19421e+09	3.3126e+09	3.2415e+09	3.19166e+09	3.3903e+09	3.36695e+09	3.53332e+09	3.6049e+09	3.47658e+09
High	High	IsMasterProtein	P21796	Voltage-dependent anion-selective channel protein 1 OS=Homo sapiens GN=VDAC1 PE=1 SV=2	0	0	71	19	1532	18	1	283	30.8	8.54	40215	2162.53	19	15	1	2.40329e+09	2.36206e+09	2.34309e+09	2.72002e+09	2.56353e+09	2.89591e+09	3.52506e+09	3.9091e+09	3.54013e+09	Acetyl [N-Term]
High	High	IsMasterProtein	O43707	Alpha-actinin-4 OS=Homo sapiens GN=ACTN4 PE=1 SV=2	0	0	71	62	1863	41	1	911	104.8	5.44	44701	2111.78	62	43	24	4.28159e+09	4.62407e+09	4.61568e+09	4.94987e+09	4.99968e+09	5.21341e+09	5.65487e+09	5.56444e+09	5.49987e+09
High	High	IsMasterProtein	Q14789	Golgin subfamily B member 1 OS=Homo sapiens GN=GOLGB1 PE=1 SV=2	0	0	63	173	1810	173	1	3259	375.8	5	42451	2101.64	169	87	0	6.96311e+08	7.37202e+08	7.02057e+08	7.21935e+08	7.18288e+08	7.40151e+08	9.36899e+08	9.57526e+08	9.23128e+08
High	High	IsMasterProtein	P00558	Phosphoglycerate kinase 1 OS=Homo sapiens GN=PGK1 PE=1 SV=3	0	0	72	28	1638	23	1	417	44.6	8.1	38591	2074.04	28	14	6	1.0712e+10	1.0494e+10	1.08452e+10	1.40539e+10	1.40306e+10	1.42849e+10	1.32954e+10	1.39849e+10	1.34559e+10
High	High	None	Q14568	Heat shock protein HSP 90-alpha A2 OS=Homo sapiens GN=HSP90AA2P PE=1 SV=2	0	0	24	7	1269	3	1	343	39.3	4.65	22766	2069.87	7	4	0	8.22725e+08	8.76205e+08	9.20441e+08	9.02258e+08	8.83145e+08	8.9986e+08	7.79253e+08	7.61724e+08	7.06603e+08
High	High	IsMasterProtein	Q12906	Interleukin enhancer-binding factor 3 OS=Homo sapiens GN=ILF3 PE=1 SV=3	0	0	72	53	1966	47	1	894	95.3	8.76	47231	2057.33	53	31	9	3.73666e+09	3.85723e+09	3.88966e+09	3.65732e+09	3.87847e+09	3.83231e+09	4.50823e+09	4.74445e+09	4.36505e+09
High	High	IsMasterProtein	P50851	Lipopolysaccharide-responsive and beige-like anchor protein OS=Homo sapiens GN=LRBA PE=1 SV=4	0	0	56	129	2046	120	1	2863	318.9	5.6	49779	2052.93	129	65	9	1.84367e+09	2.05334e+09	2.14553e+09	1.93089e+09	2.11281e+09	2.08251e+09	2.60638e+09	2.71411e+09	2.5592e+09	Acetyl [N-Term]
High	High	IsMasterProtein	Q13228	Selenium-binding protein 1 OS=Homo sapiens GN=SELENBP1 PE=1 SV=2	0	0	85	36	1701	36	1	472	52.4	6.37	39240	2040.05	36	26	0	4.44722e+09	4.6936e+09	4.51115e+09	5.39228e+09	5.50547e+09	5.80978e+09	6.50696e+09	6.82711e+09	6.42445e+09
High	High	IsMasterProtein	Q13509	Tubulin beta-3 chain OS=Homo sapiens GN=TUBB3 PE=1 SV=2	0	0	65	26	2014	7	1	450	50.4	4.93	45735	2019.89	26	20	3	7.76396e+07	8.54811e+07	7.45393e+07	7.11193e+07	7.74132e+07	7.70956e+07	1.1948e+08	1.21711e+08	1.22722e+08	Acetyl [N-Term]
High	High	IsMasterProtein	Q13813	Spectrin alpha chain, non-erythrocytic 1 OS=Homo sapiens GN=SPTAN1 PE=1 SV=3	0	0	67	162	1919	162	1	2472	284.4	5.35	45934	2016.46	161	80	0	1.23635e+09	1.31628e+09	1.24914e+09	1.40565e+09	1.41256e+09	1.49571e+09	1.51562e+09	1.55216e+09	1.46965e+09
High	High	IsMasterProtein	P12270	Nucleoprotein TPR OS=Homo sapiens GN=TPR PE=1 SV=3	0	0	53	124	2007	123	1	2363	267.1	5.02	48204	2000.98	124	63	1	2.20324e+09	2.25193e+09	2.18258e+09	2.1557e+09	2.16769e+09	2.24668e+09	2.20204e+09	2.26338e+09	2.16365e+09	Acetyl [N-Term]
n/a	High	IsMasterProtein	Q9P2E9	Ribosome-binding protein 1 OS=Homo sapiens GN=RRBP1 PE=1 SV=4		0	54	49	526	40	1	1410	152.4	8.6		1984.76		49	0	5.64433e+08	5.86541e+08	5.81862e+08	6.17244e+08	6.25528e+08	6.59148e+08	7.5161e+08	7.51053e+08	7.57168e+08
High	High	IsMasterProtein	Q09666	Neuroblast differentiation-associated protein AHNAK OS=Homo sapiens GN=AHNAK PE=1 SV=2	0	0	62	189	1925	189	1	5890	628.7	6.15	42976	1971.69	184	96	0	1.30318e+09	1.3786e+09	1.38554e+09	1.21871e+09	1.24639e+09	1.27431e+09	1.19235e+09	1.20647e+09	1.12557e+09
High	High	IsMasterProtein	P15924	Desmoplakin OS=Homo sapiens GN=DSP PE=1 SV=3	0	0	64	189	2103	188	1	2871	331.6	6.81	46244	1925.19	187	69	1	1.72926e+09	1.83309e+09	1.87215e+09	2.03331e+09	2.03516e+09	2.11438e+09	2.17079e+09	2.23793e+09	2.14051e+09	Acetyl [N-Term]
High	High	IsMasterProtein	P13010	X-ray repair cross-complementing protein 5 OS=Homo sapiens GN=XRCC5 PE=1 SV=3	0	0	63	44	1395	44	1	732	82.7	5.81	30145	1899.91	43	25	0	3.83626e+09	4.11728e+09	4.01361e+09	4.07358e+09	4.22302e+09	4.09248e+09	4.32655e+09	4.38924e+09	4.17393e+09
High	High	IsMasterProtein	P06748	Nucleophosmin OS=Homo sapiens GN=NPM1 PE=1 SV=2	0	0	65	18	1634	18	1	294	32.6	4.78	37453	1888.75	18	12	0	1.252e+10	1.36161e+10	1.23609e+10	1.27315e+10	1.24653e+10	1.24438e+10	1.44639e+10	1.45289e+10	1.51038e+10	Acetyl [N-Term]
High	High	IsMasterProtein	P22102	Trifunctional purine biosynthetic protein adenosine-3 OS=Homo sapiens GN=GART PE=1 SV=1	0	0	66	50	1332	50	1	1010	107.7	6.7	28569	1871.61	50	30	0	1.72184e+09	1.75294e+09	1.66273e+09	1.80121e+09	1.77509e+09	1.88358e+09	2.06874e+09	2.1402e+09	2.00273e+09
High	High	IsMasterProtein	P12268	Inosine-5'-monophosphate dehydrogenase 2 OS=Homo sapiens GN=IMPDH2 PE=1 SV=2	0	0	57	32	1272	30	1	514	55.8	6.9	30362	1867.54	32	19	2	2.58099e+09	2.6576e+09	2.75244e+09	2.50097e+09	2.57366e+09	2.64211e+09	3.3154e+09	3.35294e+09	3.38274e+09
High	High	IsMasterProtein	P25705	ATP synthase subunit alpha, mitochondrial OS=Homo sapiens GN=ATP5A1 PE=1 SV=1	0	0	55	31	1473	31	1	553	59.7	9.13	36940	1866.26	31	18	0	6.38724e+09	6.40878e+09	6.2926e+09	6.29764e+09	6.56514e+09	6.5089e+09	8.05356e+09	7.92915e+09	7.82259e+09
High	High	IsMasterProtein	P41252	Isoleucine--tRNA ligase, cytoplasmic OS=Homo sapiens GN=IARS PE=1 SV=2	0	0	56	59	1403	59	1	1262	144.4	6.15	32509	1853.56	57	37	0	2.06466e+09	2.14095e+09	2.14536e+09	2.38704e+09	2.37788e+09	2.45899e+09	2.82485e+09	2.86637e+09	2.79196e+09	Acetyl [N-Term]
High	High	IsMasterProtein	O75643	U5 small nuclear ribonucleoprotein 200 kDa helicase OS=Homo sapiens GN=SNRNP200 PE=1 SV=2	0	0	53	106	1676	106	1	2136	244.4	6.06	38607	1842.97	105	58	0	2.05407e+09	2.16725e+09	2.0679e+09	2.16237e+09	2.22628e+09	2.18602e+09	2.40275e+09	2.46402e+09	2.33736e+09
High	High	IsMasterProtein	Q99832	T-complex protein 1 subunit eta OS=Homo sapiens GN=CCT7 PE=1 SV=2	0	0	67	36	1414	36	1	543	59.3	7.65	34416	1838.58	35	23	0	2.60503e+09	2.64821e+09	2.59848e+09	2.48786e+09	2.49633e+09	2.56392e+09	2.97032e+09	2.98031e+09	2.82148e+09	Acetyl [N-Term]
High	High	IsMasterProtein	P29401	Transketolase OS=Homo sapiens GN=TKT PE=1 SV=3	0	0	76	37	1305	36	1	623	67.8	7.66	27043	1820.81	36	22	1	3.40834e+09	3.5162e+09	3.481e+09	3.60258e+09	3.56444e+09	3.53064e+09	4.06931e+09	4.25558e+09	3.93832e+09	Acetyl [N-Term]
High	High	IsMasterProtein	Q14974	Importin subunit beta-1 OS=Homo sapiens GN=KPNB1 PE=1 SV=2	0	0	53	41	1356	41	1	876	97.1	4.78	32093	1810.4	41	27	0	3.11571e+09	3.06394e+09	3.30343e+09	3.09878e+09	3.22834e+09	3.08692e+09	3.16186e+09	3.37773e+09	3.10258e+09	Acetyl [N-Term]
High	High	IsMasterProtein	Q32P51	Heterogeneous nuclear ribonucleoprotein A1-like 2 OS=Homo sapiens GN=HNRNPA1L2 PE=2 SV=2	0	0	50	21	1597	2	1	320	34.2	9	42089	1810.12	21	13	0	3.00187e+06	2.76593e+06	2.87587e+06	2.84101e+06	2.74959e+06	2.90781e+06	3478725	2.58265e+06	2.53411e+06
High	High	IsMasterProtein	P52272	Heterogeneous nuclear ribonucleoprotein M OS=Homo sapiens GN=HNRNPM PE=1 SV=3	0	0	72	48	2350	48	1	730	77.5	8.7	58615	1807.13	47	20	0	7.34871e+09	7.33423e+09	7.55247e+09	6.73341e+09	6.9822e+09	7.0378e+09	7.6295e+09	7.96318e+09	7.50874e+09	Acetyl [N-Term]
High	High	IsMasterProtein	P18206	Vinculin OS=Homo sapiens GN=VCL PE=1 SV=4	0	0	73	85	1617	85	1	1134	123.7	5.66	37024	1787.68	82	48	0	2.11892e+09	2.20705e+09	2.09724e+09	2.28391e+09	2.34654e+09	2.39931e+09	2.89446e+09	2.83395e+09	2.70385e+09
High	High	IsMasterProtein	P48643	T-complex protein 1 subunit epsilon OS=Homo sapiens GN=CCT5 PE=1 SV=1	0	0	74	39	1427	38	1	541	59.6	5.66	30220	1774.75	39	21	0	3.48403e+09	3.41075e+09	3.41912e+09	3.46219e+09	3.43174e+09	3.54956e+09	4.18862e+09	4.28216e+09	4.04952e+09	Acetyl [N-Term]
High	High	IsMasterProtein	Q96KP4	Cytosolic non-specific dipeptidase OS=Homo sapiens GN=CNDP2 PE=1 SV=2	0	0	78	36	1495	36	1	475	52.8	5.97	34310	1771.93	36	26	0	5.32677e+09	5.2871e+09	5.38895e+09	5.82032e+09	5.96488e+09	5.79389e+09	5.55465e+09	6.0573e+09	5.52579e+09	Acetyl [N-Term]
High	High	IsMasterProtein	P09874	Poly [ADP-ribose] polymerase 1 OS=Homo sapiens GN=PARP1 PE=1 SV=4	0	0	57	67	1552	67	1	1014	113	8.88	36588	1769.29	66	38	0	4.50306e+09	4.60397e+09	4.68162e+09	4.35423e+09	4.47938e+09	4.55668e+09	4.14525e+09	4.05676e+09	3.87179e+09
High	High	IsMasterProtein	Q13011	Delta(3,5)-Delta(2,4)-dienoyl-CoA isomerase, mitochondrial OS=Homo sapiens GN=ECH1 PE=1 SV=2	0	0	71	17	1087	17	1	328	35.8	8	24395	1755.66	17	9	0	2.18464e+09	2.34758e+09	2.37581e+09	2.45939e+09	2.31426e+09	2.53305e+09	3.25547e+09	3.25996e+09	3.20553e+09
High	High	IsMasterProtein	Q9C0C2	182 kDa tankyrase-1-binding protein OS=Homo sapiens GN=TNKS1BP1 PE=1 SV=4	0	0	75	91	1432	91	1	1729	181.7	4.86	35719	1729.01	91	53	0	6.76702e+08	7.13511e+08	6.94669e+08	8.31336e+08	8.46262e+08	8.55118e+08	8.81448e+08	9.03626e+08	8.56053e+08
High	High	IsMasterProtein	P05023	Sodium/potassium-transporting ATPase subunit alpha-1 OS=Homo sapiens GN=ATP1A1 PE=1 SV=1	0	0	50	53	1450	33	1	1023	112.8	5.49	33680	1726.23	53	25	25	2.5958e+09	2.63032e+09	2.60888e+09	2.64263e+09	2.65818e+09	2.74629e+09	3.34656e+09	3.44532e+09	3.24214e+09
High	High	IsMasterProtein	P23528	Cofilin-1 OS=Homo sapiens GN=CFL1 PE=1 SV=3	0	0	81	18	1233	13	1	166	18.5	8.09	25741	1717.11	18	9	5	7.33477e+09	7.39154e+09	7.66176e+09	8.00049e+09	7.90109e+09	8.48703e+09	9.36419e+09	1.02522e+10	9.10876e+09	Acetyl [N-Term]
High	High	IsMasterProtein	O15020	Spectrin beta chain, non-erythrocytic 2 OS=Homo sapiens GN=SPTBN2 PE=1 SV=3	0	0	57	114	1415	104	1	2390	271.2	6.11	32626	1715.25	113	67	11	9.96874e+08	1.02343e+09	9.47668e+08	1.01501e+09	1.05957e+09	1.05647e+09	1.12896e+09	1.12686e+09	1.08526e+09
High	High	IsMasterProtein	Q9P2J5	Leucine--tRNA ligase, cytoplasmic OS=Homo sapiens GN=LARS PE=1 SV=2	0	0	62	75	1463	75	1	1176	134.4	7.3	31851	1708.73	73	38	0	1.79004e+09	1.84646e+09	1.80522e+09	1.92318e+09	2.00941e+09	2.04989e+09	2.34961e+09	2.44148e+09	2.40091e+09
High	High	IsMasterProtein	P51659	Peroxisomal multifunctional enzyme type 2 OS=Homo sapiens GN=HSD17B4 PE=1 SV=3	0	0	67	42	1205	42	1	736	79.6	8.84	28335	1708.65	41	30	0	1.84369e+09	1.94708e+09	1.89843e+09	1.72877e+09	1.86909e+09	1.89114e+09	2.656e+09	2.73316e+09	2.58765e+09
High	High	IsMasterProtein	Q9UPN3	Microtubule-actin cross-linking factor 1, isoforms 1/2/3/5 OS=Homo sapiens GN=MACF1 PE=1 SV=4	0	0	35	200	1698	193	1	7388	837.8	5.39	40009	1708.33	197	99	6	5.04142e+08	5.28735e+08	5.0289e+08	5.3164e+08	5.39755e+08	5.56435e+08	5.60246e+08	5.64066e+08	5.59773e+08
High	High	IsMasterProtein	Q99460	26S proteasome non-ATPase regulatory subunit 1 OS=Homo sapiens GN=PSMD1 PE=1 SV=2	0	0	60	50	1456	50	1	953	105.8	5.39	34919	1700.14	48	29	0	1.57934e+09	1.71778e+09	1.69059e+09	1.64936e+09	1.70646e+09	1.72128e+09	1.84738e+09	1.86424e+09	1.7569e+09	Acetyl [N-Term]
High	High	IsMasterProtein	P50991	T-complex protein 1 subunit delta OS=Homo sapiens GN=CCT4 PE=1 SV=4	0	0	74	39	1429	38	1	539	57.9	7.83	33106	1687.01	38	23	1	3.04711e+09	3.08763e+09	2.98064e+09	3.0323e+09	3.08942e+09	3.09388e+09	3.84544e+09	3.88564e+09	3.69098e+09
High	High	IsMasterProtein	P46939	Utrophin OS=Homo sapiens GN=UTRN PE=1 SV=2	0	0	51	161	1699	158	1	3433	394.2	5.33	40365	1683.96	157	79	3	1.05627e+09	1.12536e+09	1.09367e+09	1.0971e+09	1.15104e+09	1.15305e+09	1.28728e+09	1.36089e+09	1.26018e+09
High	High	IsMasterProtein	P26599	Polypyrimidine tract-binding protein 1 OS=Homo sapiens GN=PTBP1 PE=1 SV=1	0	0	66	23	1246	21	1	531	57.2	9.17	26643	1671.84	22	16	3	2.5808e+09	2.79044e+09	2.75757e+09	2.77858e+09	2.85015e+09	2.80619e+09	3.12837e+09	3.04604e+09	2.99377e+09	Acetyl [N-Term]
High	High	IsMasterProtein	P17987	T-complex protein 1 subunit alpha OS=Homo sapiens GN=TCP1 PE=1 SV=1	0	0	76	35	1317	35	1	556	60.3	6.11	31515	1668.38	35	22	0	3.20276e+09	3.1394e+09	3.16311e+09	3.07538e+09	3.11546e+09	3.17202e+09	3.66525e+09	3.68328e+09	3.61334e+09	Acetyl [N-Term]
High	High	IsMasterProtein	P35221	Catenin alpha-1 OS=Homo sapiens GN=CTNNA1 PE=1 SV=1	0	0	67	53	1228	41	1	906	100	6.29	31402	1668.15	52	40	13	1.79186e+09	1.86679e+09	1.81401e+09	1.96004e+09	2.11237e+09	2.1633e+09	1.42361e+09	1.50548e+09	1.41283e+09	Acetyl [N-Term]
High	High	IsMasterProtein	P33176	Kinesin-1 heavy chain OS=Homo sapiens GN=KIF5B PE=1 SV=1	0	0	74	71	1437	56	1	963	109.6	6.51	34378	1663.68	70	42	16	1.68488e+09	1.82906e+09	1.72967e+09	1.8256e+09	1.87672e+09	1.91448e+09	2.17579e+09	2.16282e+09	1.99583e+09	Acetyl [N-Term]
High	High	IsMasterProtein	P07954	Fumarate hydratase, mitochondrial OS=Homo sapiens GN=FH PE=1 SV=3	0	0	57	19	922	19	1	510	54.6	8.76	22346	1635.28	19	12	0	1.65908e+09	1.69515e+09	1.61567e+09	1.52965e+09	1.57087e+09	1.64848e+09	1.9668e+09	2.12299e+09	2.00335e+09
High	High	IsMasterProtein	P53618	Coatomer subunit beta OS=Homo sapiens GN=COPB1 PE=1 SV=3	0	0	60	55	1212	55	1	953	107.1	6.05	26301	1631.31	55	36	0	1.12447e+09	1.14637e+09	1.13084e+09	1.18407e+09	1.17867e+09	1.27284e+09	1.34487e+09	1.38883e+09	1.33138e+09	Acetyl [N-Term]
High	High	IsMasterProtein	P52597	Heterogeneous nuclear ribonucleoprotein F OS=Homo sapiens GN=HNRNPF PE=1 SV=3	0	0	64	20	1147	18	1	415	45.6	5.58	30064	1627.87	19	11	0	1.89797e+09	1.93669e+09	1.90896e+09	1.81577e+09	1.88843e+09	1.91501e+09	2.10525e+09	2.09323e+09	2.04945e+09	Acetyl [N-Term; N-Term]
High	High	IsMasterProtein	Q6P2Q9	Pre-mRNA-processing-splicing factor 8 OS=Homo sapiens GN=PRPF8 PE=1 SV=2	0	0	58	118	1652	118	1	2335	273.4	8.84	35563	1613.27	115	56	0	2.04988e+09	2.141e+09	2.13223e+09	2.13048e+09	2.28864e+09	2.17096e+09	2.62741e+09	2.48466e+09	2.38329e+09	Acetyl [N-Term]
High	High	IsMasterProtein	P13667	Protein disulfide-isomerase A4 OS=Homo sapiens GN=PDIA4 PE=1 SV=2	0	0	65	48	1449	47	1	645	72.9	5.07	36488	1610.43	48	30	1	3.40579e+09	3.53171e+09	3.54021e+09	3.29391e+09	3.39652e+09	3.72024e+09	4.24262e+09	4.19208e+09	4.09465e+09
High	High	IsMasterProtein	Q00839	Heterogeneous nuclear ribonucleoprotein U OS=Homo sapiens GN=HNRNPU PE=1 SV=6	0	0	53	41	1344	40	1	825	90.5	6	29434	1586.93	41	24	2	5.62052e+09	5.56874e+09	5.34464e+09	5.72542e+09	5.83702e+09	5.87678e+09	6.31985e+09	6.4084e+09	6.43807e+09	Acetyl [N-Term]
High	High	IsMasterProtein	P20700	Lamin-B1 OS=Homo sapiens GN=LMNB1 PE=1 SV=2	0	0	74	52	1451	48	1	586	66.4	5.16	36982	1580.59	52	32	3	4.18871e+09	4.36415e+09	4.38936e+09	4.0653e+09	4.1622e+09	4.17601e+09	4.31045e+09	4.2648e+09	3.97814e+09	Acetyl [N-Term]
High	High	IsMasterProtein	Q13435	Splicing factor 3B subunit 2 OS=Homo sapiens GN=SF3B2 PE=1 SV=2	0	0	59	58	1226	58	1	895	100.2	5.67	28866	1579.68	56	27	0	1.23405e+09	1.35145e+09	1.26001e+09	1.28514e+09	1.30171e+09	1.29062e+09	1.31824e+09	1.26516e+09	1.22985e+09	Acetyl [N-Term]
High	High	IsMasterProtein	Q7Z406	Myosin-14 OS=Homo sapiens GN=MYH14 PE=1 SV=2	0	0	56	118	1478	102	1	1995	227.7	5.6	37068	1562.91	118	60	2	5.36728e+08	5.47474e+08	5.50723e+08	5.84345e+08	6.01986e+08	6.07768e+08	8.62166e+08	8.77965e+08	8.39946e+08	Acetyl [N-Term]
High	High	IsMasterProtein	P05198	Eukaryotic translation initiation factor 2 subunit 1 OS=Homo sapiens GN=EIF2S1 PE=1 SV=3	0	0	72	29	1179	29	1	315	36.1	5.08	29712	1561.8	27	19	0	1.46384e+09	1.42235e+09	1.4163e+09	1.53118e+09	1.54606e+09	1.55851e+09	1.94923e+09	1.96473e+09	1.91122e+09
High	High	IsMasterProtein	P12814	Alpha-actinin-1 OS=Homo sapiens GN=ACTN1 PE=1 SV=2	0	0	72	53	1399	32	1	892	103	5.41	31861	1552.26	53	39	2	8.14507e+08	8.30738e+08	8.00571e+08	8.45028e+08	8.39794e+08	9.11842e+08	9.66038e+08	9.93962e+08	1.04184e+09	Acetyl [N-Term]
High	High	IsMasterProtein	P50990	T-complex protein 1 subunit theta OS=Homo sapiens GN=CCT8 PE=1 SV=4	0	0	78	43	1441	43	1	548	59.6	5.6	36299	1550.46	42	32	0	5.0518e+09	5.13233e+09	5.26087e+09	5.15462e+09	5.06655e+09	5.23837e+09	5.5441e+09	5.9274e+09	5.57404e+09
High	High	IsMasterProtein	P05787	Keratin, type II cytoskeletal 8 OS=Homo sapiens GN=KRT8 PE=1 SV=7	0	0	80	45	1616	35	1	483	53.7	5.59	38340	1543.93	45	24	11	8.66358e+09	8.69081e+09	8.39952e+09	9.6602e+09	1.01671e+10	9.90114e+09	9.29664e+09	9.79597e+09	9.32485e+09
High	High	IsMasterProtein	P43243	Matrin-3 OS=Homo sapiens GN=MATR3 PE=1 SV=2	0	0	65	58	1297	58	1	847	94.6	6.25	28474	1537.89	57	35	0	2.91986e+09	2.89059e+09	2.86715e+09	2.84322e+09	3.16397e+09	3.05475e+09	3.28443e+09	3.17504e+09	3.1699e+09
High	High	IsMasterProtein	P49736	DNA replication licensing factor MCM2 OS=Homo sapiens GN=MCM2 PE=1 SV=4	0	0	62	49	1179	49	1	904	101.8	5.52	27784	1520.99	49	30	0	1.20996e+09	1.21565e+09	1.23919e+09	1.13767e+09	1.17145e+09	1.15187e+09	8.65904e+08	8.67725e+08	8.26471e+08	Acetyl [N-Term]
High	High	IsMasterProtein	P53621	Coatomer subunit alpha OS=Homo sapiens GN=COPA PE=1 SV=2	0	0	65	75	1311	75	1	1224	138.3	7.66	28071	1517.41	74	42	0	2.21928e+09	2.29648e+09	2.2353e+09	2.42903e+09	2.41633e+09	2.5171e+09	2.65377e+09	2.72811e+09	2.67579e+09
High	High	IsMasterProtein	P22626	Heterogeneous nuclear ribonucleoproteins A2/B1 OS=Homo sapiens GN=HNRNPA2B1 PE=1 SV=2	0	0	73	32	1619	29	1	353	37.4	8.95	48921	1501.07	31	19	2	1.12137e+10	1.2294e+10	1.17515e+10	1.06416e+10	1.16054e+10	1.0987e+10	1.20973e+10	1.28065e+10	1.1837e+10
High	High	IsMasterProtein	P26640	Valine--tRNA ligase OS=Homo sapiens GN=VARS PE=1 SV=4	0	0	55	63	1451	63	1	1264	140.4	7.59	34387	1490.52	63	33	0	2.94075e+09	2.97118e+09	2.93706e+09	3.11572e+09	3.17146e+09	3.37601e+09	3.91777e+09	4.09152e+09	3.888e+09	Acetyl [N-Term]
High	High	IsMasterProtein	P30101	Protein disulfide-isomerase A3 OS=Homo sapiens GN=PDIA3 PE=1 SV=4	0	0	66	37	1433	36	1	505	56.7	6.35	36336	1483.48	37	25	0	7.65266e+09	7.88359e+09	8.06762e+09	7.56764e+09	7.62062e+09	7.84869e+09	8.06464e+09	8.45818e+09	8.42129e+09
High	High	IsMasterProtein	Q15365	Poly(rC)-binding protein 1 OS=Homo sapiens GN=PCBP1 PE=1 SV=2	0	0	85	20	1242	14	1	356	37.5	7.09	29582	1463.63	20	14	9	3.78669e+09	3.4607e+09	3.61442e+09	3.65128e+09	3.71391e+09	3.92013e+09	3931719889	3.99913e+09	4.20193e+09
High	High	IsMasterProtein	P46940	Ras GTPase-activating-like protein IQGAP1 OS=Homo sapiens GN=IQGAP1 PE=1 SV=1	0	0	63	90	1307	88	1	1657	189.1	6.48	29806	1457.43	86	51	2	9.37536e+08	9.87733e+08	1.00003e+09	1.05709e+09	1.0602e+09	1.0243e+09	1.01715e+09	1.04889e+09	9.99032e+08	Acetyl [N-Term]
High	High	IsMasterProtein	O00410	Importin-5 OS=Homo sapiens GN=IPO5 PE=1 SV=4	0	0	70	53	1209	49	1	1097	123.6	4.94	27853	1453.32	53	33	6	1.3458e+09	1.41026e+09	1.39453e+09	1.32187e+09	1.33949e+09	1.39793e+09	1.54939e+09	1.70109e+09	1.56793e+09	Acetyl [N-Term]
High	High	IsMasterProtein	P50395	Rab GDP dissociation inhibitor beta OS=Homo sapiens GN=GDI2 PE=1 SV=2	0	0	79	35	1231	24	1	445	50.6	6.47	27029	1442.78	35	24	13	3.83252e+09	3.8556e+09	3.96013e+09	3.9005e+09	3.79523e+09	4.01826e+09	4.60239e+09	4.83779e+09	4.52343e+09
High	High	IsMasterProtein	P53396	ATP-citrate synthase OS=Homo sapiens GN=ACLY PE=1 SV=3	0	0	59	64	1551	64	1	1101	120.8	7.33	37781	1442.71	63	37	0	3.38252e+09	3.52312e+09	3.57476e+09	3.98803e+09	4.05632e+09	4.24805e+09	4.44685e+09	4.68866e+09	4.55496e+09
High	High	IsMasterProtein	P06744	Glucose-6-phosphate isomerase OS=Homo sapiens GN=GPI PE=1 SV=4	0	0	61	32	1291	31	1	558	63.1	8.32	28908	1442.28	31	19	1	7.23506e+09	7.49164e+09	7.31819e+09	8.38352e+09	8.4138e+09	8.72493e+09	9.05419e+09	8.94151e+09	8.59296e+09	Acetyl [N-Term]
High	High	IsMasterProtein	P07237	Protein disulfide-isomerase OS=Homo sapiens GN=P4HB PE=1 SV=3	0	0	71	38	1330	38	1	508	57.1	4.87	31604	1408.46	38	19	0	7.4981e+09	8.04096e+09	7.36757e+09	8.06425e+09	8.40662e+09	8.92428e+09	9.73669e+09	9.688e+09	9.24309e+09
High	High	IsMasterProtein	P27797	Calreticulin OS=Homo sapiens GN=CALR PE=1 SV=1	0	0	77	34	1512	34	1	417	48.1	4.44	33186	1403.89	34	22	0	6.44421e+09	6.36959e+09	6.51206e+09	6.02556e+09	7.22667e+09	6.9814e+09	7.52059e+09	7.72558e+09	7.26078e+09
High	High	IsMasterProtein	Q08378	Golgin subfamily A member 3 OS=Homo sapiens GN=GOLGA3 PE=1 SV=2	0	0	66	87	1128	87	1	1498	167.3	5.44	27355	1393.52	86	51	0	5.07793e+08	5.36748e+08	5.23192e+08	5.57432e+08	5.84855e+08	5.90359e+08	7.40375e+08	7.4799e+08	6.87945e+08	Acetyl [N-Term]
High	High	IsMasterProtein	Q9UQ35	Serine/arginine repetitive matrix protein 2 OS=Homo sapiens GN=SRRM2 PE=1 SV=2	0	0	32	67	1136	67	1	2752	299.4	12.06	26540	1385.4	66	34	0	7.41269e+08	7.96434e+08	7.7343e+08	7.8523e+08	8.0136e+08	8.55459e+08	8.90984e+08	9.3159e+08	8.7646e+08	Acetyl [N-Term]
High	High	IsMasterProtein	P49748	Very long-chain specific acyl-CoA dehydrogenase, mitochondrial OS=Homo sapiens GN=ACADVL PE=1 SV=1	0	0	65	39	1078	39	1	655	70.3	8.75	25809	1381.63	39	24	0	1.57778e+09	1.64105e+09	1.59673e+09	1.64209e+09	1.56005e+09	1.72801e+09	2.19746e+09	2.2411e+09	2.17187e+09
High	High	IsMasterProtein	P0DMV9	Heat shock 70 kDa protein 1B OS=Homo sapiens GN=HSPA1B PE=1 SV=1	0	0	62	35	1258	22	1	641	70	5.66	30006	1375.29	35	18	12	4.50802e+09	4.55713e+09	4.54728e+09	4.88729e+09	5.1469e+09	5.19948e+09	5.94451e+09	6.4284e+09	5.55169e+09
High	High	IsMasterProtein	P11586	C-1-tetrahydrofolate synthase, cytoplasmic OS=Homo sapiens GN=MTHFD1 PE=1 SV=3	0	0	69	56	1135	55	1	935	101.5	7.3	24809	1365.63	56	34	1	3.68517e+09	3.8665e+09	3.71037e+09	3.37234e+09	3.60025e+09	3.55506e+09	3.94991e+09	4.04911e+09	3.86403e+09	Acetyl [N-Term; N-Term]
High	High	IsMasterProtein	Q12955	Ankyrin-3 OS=Homo sapiens GN=ANK3 PE=1 SV=3	0	0	26	93	1168	93	1	4377	480.1	6.49	27823	1363.02	91	49	0	7.6333e+08	8.06634e+08	8.23807e+08	8.73617e+08	9.24175e+08	9.21307e+08	8.93276e+08	9.09834e+08	8.56506e+08
High	High	IsMasterProtein	P00390	Glutathione reductase, mitochondrial OS=Homo sapiens GN=GSR PE=1 SV=2	0	0	62	25	888	25	1	522	56.2	8.5	21591	1359.5	25	17	0	1.45868e+09	1.61167e+09	1.45896e+09	1.42669e+09	1.57929e+09	1.58388e+09	2048961841	2.05114e+09	1.87474e+09
High	High	IsMasterProtein	P31939	Bifunctional purine biosynthesis protein PURH OS=Homo sapiens GN=ATIC PE=1 SV=3	0	0	83	43	1126	43	1	592	64.6	6.71	24789	1355.71	42	23	0	1.86857e+09	2.02155e+09	1.95636e+09	2.08274e+09	2.18616e+09	2.1534e+09	2.84029e+09	2.96201e+09	2.69889e+09	Acetyl [N-Term]
High	High	IsMasterProtein	Q04637	Eukaryotic translation initiation factor 4 gamma 1 OS=Homo sapiens GN=EIF4G1 PE=1 SV=4	0	0	54	84	1727	78	1	1599	175.4	5.33	40833	1354.56	84	38	11	3.36548e+09	3.58702e+09	3.46279e+09	3.62869e+09	3.69725e+09	3.70227e+09	4.43312e+09	4.50337e+09	4.32663e+09
High	High	IsMasterProtein	P25205	DNA replication licensing factor MCM3 OS=Homo sapiens GN=MCM3 PE=1 SV=3	0	0	70	55	1135	55	1	808	90.9	5.77	26213	1353.13	54	33	0	1.52361e+09	1.61793e+09	1.52403e+09	1.38392e+09	1.39673e+09	1.4495e+09	1.12506e+09	1.16461e+09	1.10573e+09	Acetyl [N-Term]
High	High	IsMasterProtein	Q7KZF4	Staphylococcal nuclease domain-containing protein 1 OS=Homo sapiens GN=SND1 PE=1 SV=1	0	0	64	59	1443	59	1	910	101.9	7.17	34959	1348.84	59	36	0	4.3488e+09	4.47319e+09	4.69876e+09	4.46407e+09	4.46862e+09	4.66151e+09	5.25318e+09	5.31126e+09	5.15173e+09	Acetyl [N-Term]
High	High	IsMasterProtein	P42704	Leucine-rich PPR motif-containing protein, mitochondrial OS=Homo sapiens GN=LRPPRC PE=1 SV=3	0	0	68	83	1400	82	1	1394	157.8	6.13	34365	1345.64	80	46	1	1.93571e+09	1.99993e+09	1.96157e+09	1.79087e+09	1.84679e+09	1.8428e+09	2.91267e+09	2.97995e+09	2.76938e+09
High	High	IsMasterProtein	Q9Y4L1	Hypoxia up-regulated protein 1 OS=Homo sapiens GN=HYOU1 PE=1 SV=1	0	0	59	53	1214	52	1	999	111.3	5.22	30219	1342.89	51	31	1	2.06355e+09	2.10096e+09	2.06446e+09	2.16231e+09	2.29913e+09	2.28574e+09	2.74131e+09	2729075577	2.56204e+09
High	High	IsMasterProtein	O75083	WD repeat-containing protein 1 OS=Homo sapiens GN=WDR1 PE=1 SV=4	0	0	60	23	926	23	1	606	66.2	6.65	22107	1337.2	23	13	0	9.27366e+08	9.97498e+08	9.48663e+08	1.03871e+09	1.0274e+09	1.02027e+09	1.31693e+09	1.29317e+09	1.29096e+09
High	High	IsMasterProtein	P17858	ATP-dependent 6-phosphofructokinase, liver type OS=Homo sapiens GN=PFKL PE=1 SV=6	0	0	58	36	923	31	1	780	85	7.5	20267	1332.55	33	22	0	9.11599e+08	9.07507e+08	9.10384e+08	9.94025e+08	1.04597e+09	1.04347e+09	9.97601e+08	1.0627e+09	9.86409e+08
High	High	IsMasterProtein	P31943	Heterogeneous nuclear ribonucleoprotein H OS=Homo sapiens GN=HNRNPH1 PE=1 SV=4	0	0	59	24	1142	14	1	449	49.2	6.3	29779	1325.96	24	15	12	3.35164e+09	3.42185e+09	3.4633e+09	3.28977e+09	3.44995e+09	3.40819e+09	3.3448e+09	3.41099e+09	3.29809e+09	Acetyl [N-Term; N-Term]
High	High	IsMasterProtein	P49321	Nuclear autoantigenic sperm protein OS=Homo sapiens GN=NASP PE=1 SV=2	0	0	87	60	1248	60	1	788	85.2	4.3	31562	1324.79	59	32	0	1.22424e+09	1.35638e+09	1.32551e+09	1.08053e+09	1.20282e+09	1.21393e+09	1.09728e+09	1.10406e+09	1.02641e+09	Acetyl [N-Term]
High	High	IsMasterProtein	Q13200	26S proteasome non-ATPase regulatory subunit 2 OS=Homo sapiens GN=PSMD2 PE=1 SV=3	0	0	65	52	1242	52	1	908	100.1	5.2	27706	1318.74	51	26	0	2.25122e+09	2.37995e+09	2.40621e+09	2.49895e+09	2.55943e+09	2.60831e+09	2.80685e+09	2.83966e+09	2.82138e+09	Acetyl [N-Term]
High	High	IsMasterProtein	Q92598	Heat shock protein 105 kDa OS=Homo sapiens GN=HSPH1 PE=1 SV=1	0	0	74	55	1152	51	1	858	96.8	5.39	25706	1317.12	54	35	2	1.45198e+09	1.4747e+09	1.51851e+09	1.6204e+09	1.66561e+09	1.6834e+09	1.81012e+09	1.85094e+09	1.72257e+09	Acetyl [N-Term]
High	High	IsMasterProtein	P14923	Junction plakoglobin OS=Homo sapiens GN=JUP PE=1 SV=3	0	0	68	39	1097	34	1	745	81.7	6.14	28960	1315.04	38	22	6	1.24678e+09	1.32486e+09	1.27457e+09	1.33692e+09	1.48029e+09	1.48586e+09	1.58791e+09	1.68572e+09	1.55276e+09	Acetyl [N-Term]
High	High	IsMasterProtein	P27708	CAD protein OS=Homo sapiens GN=CAD PE=1 SV=3	0	0	56	87	1117	84	1	2225	242.8	6.46	23599	1308.68	84	47	3	8.16357e+08	8.01522e+08	7.75351e+08	7.30044e+08	7.82233e+08	7.74998e+08	8.47691e+08	8.86803e+08	8.47901e+08	Acetyl [N-Term]
High	High	IsMasterProtein	P23246	Splicing factor, proline- and glutamine-rich OS=Homo sapiens GN=SFPQ PE=1 SV=2	0	0	54	39	1502	36	1	707	76.1	9.44	30757	1294.11	39	22	2	4.47166e+09	4.53899e+09	4.5105e+09	3.99769e+09	4.00478e+09	4.50366e+09	4.45859e+09	4.5753e+09	4.39522e+09
High	High	IsMasterProtein	P49368	T-complex protein 1 subunit gamma OS=Homo sapiens GN=CCT3 PE=1 SV=4	0	0	67	39	1324	39	1	545	60.5	6.49	31738	1289.1	39	24	0	4.70353e+09	4.89173e+09	4.8708e+09	4.55652e+09	4.75108e+09	4.79997e+09	5.38722e+09	5.60304e+09	5.44698e+09	Acetyl [N-Term]
High	High	IsMasterProtein	Q14157	Ubiquitin-associated protein 2-like OS=Homo sapiens GN=UBAP2L PE=1 SV=2	0	0	49	37	969	37	1	1087	114.5	7.11	21002	1288.34	37	25	0	1021861661	1.02465e+09	1.0515e+09	1.01952e+09	1.03309e+09	1.0763e+09	1.19867e+09	1.22904e+09	1.18112e+09	Acetyl [N-Term]
High	High	IsMasterProtein	Q8WUY3	Protein prune homolog 2 OS=Homo sapiens GN=PRUNE2 PE=1 SV=3	0	0	49	92	1071	91	1	3088	340.4	4.45	24668	1280.78	88	62	1	4.00519e+08	4.08268e+08	3.88234e+08	3.80722e+08	3.77259e+08	3.74235e+08	4.29425e+08	4.26866e+08	4.31383e+08	Acetyl [N-Term]
High	High	IsMasterProtein	Q86VP6	Cullin-associated NEDD8-dissociated protein 1 OS=Homo sapiens GN=CAND1 PE=1 SV=2	0	0	51	60	1285	60	1	1230	136.3	5.78	30132	1277.45	60	36	0	2.84255e+09	2.89618e+09	2.88903e+09	3.0607e+09	3.09501e+09	3.11238e+09	3.72394e+09	3.8276e+09	3.66429e+09	Acetyl [N-Term]
High	High	IsMasterProtein	P40939	Trifunctional enzyme subunit alpha, mitochondrial OS=Homo sapiens GN=HADHA PE=1 SV=2	0	0	64	36	978	36	1	763	82.9	9.04	21823	1270.74	35	23	0	1.15205e+09	1.18381e+09	1.19339e+09	1.15476e+09	1.1686e+09	1.15895e+09	1.65732e+09	1.69738e+09	1.73035e+09
High	High	IsMasterProtein	P54578	Ubiquitin carboxyl-terminal hydrolase 14 OS=Homo sapiens GN=USP14 PE=1 SV=3	0	0	69	33	1085	33	1	494	56	5.3	24110	1254.36	33	21	0	1.64408e+09	1.76336e+09	1.68435e+09	1.60901e+09	1726157942	1.7341e+09	1.93175e+09	1.93299e+09	1.8681e+09
High	High	IsMasterProtein	Q8WUM4	Programmed cell death 6-interacting protein OS=Homo sapiens GN=PDCD6IP PE=1 SV=1	0	0	62	54	1017	54	1	868	96	6.52	24861	1247.62	54	23	0	1.68487e+09	1.74996e+09	1.66172e+09	1.71968e+09	1.76277e+09	1.83668e+09	2.22477e+09	2.27201e+09	2.04458e+09	Acetyl [N-Term]
High	High	IsMasterProtein	P40926	Malate dehydrogenase, mitochondrial OS=Homo sapiens GN=MDH2 PE=1 SV=3	0	0	66	21	1049	21	1	338	35.5	8.68	25785	1246.54	20	14	0	5.67996e+09	5.95998e+09	5.82279e+09	5.74081e+09	6.14612e+09	6.18735e+09	8.2111e+09	9.04185e+09	8.23e+09
High	High	IsMasterProtein	Q5JRA6	Melanoma inhibitory activity protein 3 OS=Homo sapiens GN=MIA3 PE=1 SV=1	0	0	57	100	1191	100	1	1907	213.6	4.84	28147	1234.5	98	49	0	7.37277e+08	7.89205e+08	8.23212e+08	7.97796e+08	8.13506e+08	8.51286e+08	9.67844e+08	1.00524e+09	9.15019e+08
High	High	IsMasterProtein	Q14203	Dynactin subunit 1 OS=Homo sapiens GN=DCTN1 PE=1 SV=3	0	0	60	70	1103	70	1	1278	141.6	5.81	26040	1234.2	68	45	0	6.96245e+08	7.34553e+08	7.226e+08	7.57598e+08	7.76284e+08	7.92477e+08	9.01456e+08	8.81817e+08	8.33711e+08
High	High	IsMasterProtein	P23921	Ribonucleoside-diphosphate reductase large subunit OS=Homo sapiens GN=RRM1 PE=1 SV=1	0	0	73	45	929	45	1	792	90	7.15	18606	1231.46	44	30	0	1.47583e+09	1.58347e+09	1.49488e+09	1.3162e+09	1.3666e+09	1.3954e+09	1.41772e+09	1.44739e+09	1.37238e+09
High	High	IsMasterProtein	P12956	X-ray repair cross-complementing protein 6 OS=Homo sapiens GN=XRCC6 PE=1 SV=2	0	0	59	42	1189	42	1	609	69.8	6.64	26060	1223.37	42	26	0	4.40574e+09	4.53202e+09	4.46064e+09	4.39953e+09	4.71878e+09	4.53169e+09	4.3877e+09	4.62103e+09	4.33923e+09	Acetyl [N-Term]
High	High	IsMasterProtein	P18754	Regulator of chromosome condensation OS=Homo sapiens GN=RCC1 PE=1 SV=1	0	0	67	20	767	20	1	421	44.9	7.52	19511	1222.9	20	17	0	5.50351e+08	5.5862e+08	5.48875e+08	5.49995e+08	5.53716e+08	5.56453e+08	5.52203e+08	5.71891e+08	5.54542e+08
High	High	IsMasterProtein	Q02790	Peptidyl-prolyl cis-trans isomerase FKBP4 OS=Homo sapiens GN=FKBP4 PE=1 SV=3	0	0	76	41	1340	41	1	459	51.8	5.43	29488	1220.04	41	21	0	5.98774e+09	6.41625e+09	6.3212e+09	6.44901e+09	7.04591e+09	6.97966e+09	7.93769e+09	8.16944e+09	7.58182e+09	Acetyl [N-Term]
High	High	IsMasterProtein	Q99613	Eukaryotic translation initiation factor 3 subunit C OS=Homo sapiens GN=EIF3C PE=1 SV=1	0	0	45	45	1070	44	1	913	105.3	5.68	25589	1219.98	45	17	1	1.62514e+09	1.75315e+09	1.75361e+09	1.75485e+09	1.91695e+09	1.88917e+09	2.22944e+09	2.32684e+09	2.2168e+09
High	High	IsMasterProtein	P56192	Methionine--tRNA ligase, cytoplasmic OS=Homo sapiens GN=MARS PE=1 SV=2	0	0	55	47	933	47	1	900	101.1	6.16	21621	1209.76	46	35	0	1.75434e+09	1.80694e+09	1.86917e+09	1.79407e+09	1.93557e+09	1.81394e+09	2.18486e+09	2.26769e+09	2.11818e+09
High	High	IsMasterProtein	Q15233	Non-POU domain-containing octamer-binding protein OS=Homo sapiens GN=NONO PE=1 SV=4	0	0	60	35	1560	29	1	471	54.2	8.95	38846	1207.22	35	12	4	3.54632e+09	3.71894e+09	3.74381e+09	3.19594e+09	3.44478e+09	3.56709e+09	3646050143	3.84855e+09	3.56797e+09
High	High	IsMasterProtein	O14980	Exportin-1 OS=Homo sapiens GN=XPO1 PE=1 SV=1	0	0	51	51	1050	51	1	1071	123.3	6.06	22646	1200.08	50	28	0	1.3334e+09	1.36528e+09	1.29396e+09	1.3051e+09	1.28313e+09	1.26242e+09	1.28195e+09	1.2712e+09	1.21443e+09
High	High	IsMasterProtein	P34897	Serine hydroxymethyltransferase, mitochondrial OS=Homo sapiens GN=SHMT2 PE=1 SV=3	0	0	78	35	1112	33	1	504	56	8.53	25411	1195.61	35	20	3	2.5578e+09	2.81693e+09	2.72496e+09	2.80674e+09	3.01006e+09	2.83798e+09	3.42401e+09	3.55365e+09	3.24866e+09
High	High	IsMasterProtein	Q99714	3-hydroxyacyl-CoA dehydrogenase type-2 OS=Homo sapiens GN=HSD17B10 PE=1 SV=3	0	0	79	15	686	15	1	261	26.9	7.78	16617	1189.33	15	13	0	6.85483e+08	7.28763e+08	7.47614e+08	7.59517e+08	8.10053e+08	7.92857e+08	1.16503e+09	1.1402e+09	1.10526e+09
High	High	IsMasterProtein	Q15029	116 kDa U5 small nuclear ribonucleoprotein component OS=Homo sapiens GN=EFTUD2 PE=1 SV=1	0	0	71	58	994	57	1	972	109.4	5	22536	1183.12	57	37	0	1.0437e+09	1.08898e+09	1.08953e+09	1.11264e+09	1.16593e+09	1.14078e+09	1.36229e+09	1.43517e+09	1.30826e+09
High	High	IsMasterProtein	P16615	Sarcoplasmic/endoplasmic reticulum calcium ATPase 2 OS=Homo sapiens GN=ATP2A2 PE=1 SV=1	0	0	51	46	1032	46	1	1042	114.7	5.34	22515	1182.01	46	22	0	1.27248e+09	1.33897e+09	1.30677e+09	1.40662e+09	1.43676e+09	1.46024e+09	1.85319e+09	1.87223e+09	1.7623e+09	Acetyl [N-Term]
High	High	IsMasterProtein	Q9Y520	Protein PRRC2C OS=Homo sapiens GN=PRRC2C PE=1 SV=4	0	0	43	107	1062	103	1	2896	316.7	9.13	23451	1180.44	106	48	4	6.72987e+08	6.72004e+08	6.67876e+08	6.57255e+08	6.53487e+08	6.88985e+08	6.86712e+08	7.10473e+08	6.79282e+08
High	High	IsMasterProtein	Q9Y678	Coatomer subunit gamma-1 OS=Homo sapiens GN=COPG1 PE=1 SV=1	0	0	75	52	1005	47	1	874	97.7	5.47	22544	1175.89	52	30	6	1.26516e+09	1.30449e+09	1.21329e+09	1.30336e+09	1.37349e+09	1.34214e+09	1.38881e+09	1.36227e+09	1.39725e+09
High	High	IsMasterProtein	Q15366	Poly(rC)-binding protein 2 OS=Homo sapiens GN=PCBP2 PE=1 SV=1	0	0	77	19	1007	11	1	365	38.6	6.79	23494	1175.79	19	12	3	2.33299e+09	2.56887e+09	2.46151e+09	2.41087e+09	2.47037e+09	2.49218e+09	2.58587e+09	2.65577e+09	2.372e+09
High	High	IsMasterProtein	Q92945	Far upstream element-binding protein 2 OS=Homo sapiens GN=KHSRP PE=1 SV=4	0	0	65	44	1212	41	1	711	73.1	7.3	33345	1165.03	43	25	3	2.37693e+09	2.62794e+09	2.33181e+09	2.21179e+09	2.36939e+09	2.4004e+09	1.95629e+09	2.24478e+09	2.00416e+09	Acetyl [N-Term; N-Term]
High	High	IsMasterProtein	Q9Y285	Phenylalanine--tRNA ligase alpha subunit OS=Homo sapiens GN=FARSA PE=1 SV=3	0	0	62	28	874	28	1	508	57.5	7.8	22764	1162.44	27	18	0	9.44746e+08	1.00673e+09	1.02788e+09	1.05714e+09	1.13117e+09	1.0703e+09	1.38669e+09	1.44394e+09	1.39844e+09	Acetyl [N-Term]
High	High	IsMasterProtein	P33991	DNA replication licensing factor MCM4 OS=Homo sapiens GN=MCM4 PE=1 SV=5	0	0	61	48	963	47	1	863	96.5	6.74	20968	1162.06	48	29	1	1.08129e+09	1.18548e+09	1.10839e+09	1.01745e+09	9.88504e+08	1.07838e+09	8.17546e+08	8.78358e+08	8.2225e+08	Acetyl [N-Term]
High	High	IsMasterProtein	Q14839	Chromodomain-helicase-DNA-binding protein 4 OS=Homo sapiens GN=CHD4 PE=1 SV=2	0	0	54	92	1166	69	1	1912	217.9	5.86	24475	1161.8	91	49	25	7.44768e+08	7.57077e+08	7.86097e+08	6.68029e+08	6.66008e+08	6.53854e+08	6.89359e+08	7.3015e+08	6.60308e+08
High	High	None	Q3ZCM7	Tubulin beta-8 chain OS=Homo sapiens GN=TUBB8 PE=1 SV=2	0	0	24	10	1872	0	1	444	49.7	4.89	52938	1158.9	10	7	0	1.26105e+10	1.29732e+10	1.31362e+10	1.34713e+10	1.34922e+10	1.40014e+10	1.40402e+10	1.4024e+10	1.35678e+10
High	High	IsMasterProtein	P43686	26S protease regulatory subunit 6B OS=Homo sapiens GN=PSMC4 PE=1 SV=2	0	0	74	34	779	33	1	418	47.3	5.21	15723	1158.25	34	21	2	1.05925e+09	1.16423e+09	1.17875e+09	1.2511e+09	1.29945e+09	1.25507e+09	1.43552e+09	1.40233e+09	1.29836e+09	Acetyl [N-Term]
High	High	IsMasterProtein	P05388	60S acidic ribosomal protein P0 OS=Homo sapiens GN=RPLP0 PE=1 SV=1	0	0	58	15	704	5	1	317	34.3	5.97	13082	1157.7	15	11	12	4.5176e+09	4.57963e+09	4.60114e+09	4.71208e+09	4.36764e+09	4.48557e+09	4.93589e+09	5.12084e+09	5.03524e+09
High	High	IsMasterProtein	P51991	Heterogeneous nuclear ribonucleoprotein A3 OS=Homo sapiens GN=HNRNPA3 PE=1 SV=2	0	0	65	33	999	30	1	378	39.6	9.01	27871	1152.41	33	20	3	2.77171e+09	3.04125e+09	3.39876e+09	2.74832e+09	2.84871e+09	2.97814e+09	3.16699e+09	3.28084e+09	3.0717e+09	Acetyl [N-Term]
High	High	IsMasterProtein	P30086	Phosphatidylethanolamine-binding protein 1 OS=Homo sapiens GN=PEBP1 PE=1 SV=3	0	0	82	14	757	14	1	187	21	7.53	17582	1150.73	14	9	0	5.70759e+09	6.33264e+09	5.63613e+09	6.28813e+09	6.06231e+09	6.62724e+09	7.30207e+09	7.75534e+09	7.70263e+09
High	High	IsMasterProtein	P61978	Heterogeneous nuclear ribonucleoprotein K OS=Homo sapiens GN=HNRNPK PE=1 SV=1	0	0	68	34	1458	34	1	463	50.9	5.54	32949	1150.13	34	20	0	8.88936e+09	9.71613e+09	9.72298e+09	8.63129e+09	8.95968e+09	9.19238e+09	9.52147e+09	9.80567e+09	9.4818e+09	Acetyl [N-Term]
High	High	IsMasterProtein	O60763	General vesicular transport factor p115 OS=Homo sapiens GN=USO1 PE=1 SV=2	0	0	54	43	844	43	1	962	107.8	4.91	22782	1149.51	43	25	0	6.50068e+08	6.8864e+08	6.35261e+08	6.82126e+08	7.05677e+08	7.12688e+08	7.95937e+08	7.88692e+08	7.6177e+08
High	High	IsMasterProtein	Q5T4S7	E3 ubiquitin-protein ligase UBR4 OS=Homo sapiens GN=UBR4 PE=1 SV=1	0	0	37	154	1332	154	1	5183	573.5	6.04	31775	1147.8	153	68	0	4.41895e+08	4.52529e+08	4.54889e+08	4.75891e+08	4.85378e+08	4.93398e+08	5.53761e+08	5.48492e+08	5.40327e+08
High	High	IsMasterProtein	O75533	Splicing factor 3B subunit 1 OS=Homo sapiens GN=SF3B1 PE=1 SV=3	0	0	60	64	1183	64	1	1304	145.7	7.09	26005	1142.5	64	36	0	1.18705e+09	1.24387e+09	1.23387e+09	1.15935e+09	1.20913e+09	1224705823	1.22037e+09	1.26045e+09	1.17059e+09
High	High	IsMasterProtein	P54136	Arginine--tRNA ligase, cytoplasmic OS=Homo sapiens GN=RARS PE=1 SV=2	0	0	73	46	1032	46	1	660	75.3	6.68	23147	1141.85	45	21	0	1.77907e+09	1.85269e+09	1.75681e+09	1.95273e+09	1.92217e+09	2.01174e+09	2.3886e+09	2.56312e+09	2.41396e+09	Acetyl [N-Term]
High	High	IsMasterProtein	Q06210	Glutamine--fructose-6-phosphate aminotransferase [isomerizing] 1 OS=Homo sapiens GN=GFPT1 PE=1 SV=3	0	0	69	46	966	46	1	699	78.8	7.11	21783	1138.17	46	25	0	1.12503e+09	1.16103e+09	1.15407e+09	1.31757e+09	1.3208e+09	1.32675e+09	1.30329e+09	1.30565e+09	1233429576
High	High	IsMasterProtein	Q00341	Vigilin OS=Homo sapiens GN=HDLBP PE=1 SV=2	0	0	56	65	1130	64	1	1268	141.4	6.87	25955	1137.01	64	32	0	1.53993e+09	1.5597e+09	1.51521e+09	1.77896e+09	1.84487e+09	1.86298e+09	1.94554e+09	2.04851e+09	1.89254e+09	Acetyl [N-Term]
High	High	IsMasterProtein	P40227	T-complex protein 1 subunit zeta OS=Homo sapiens GN=CCT6A PE=1 SV=3	0	0	69	30	753	24	1	531	58	6.68	13871	1135.55	27	17	7	2.42236e+09	2.42687e+09	2.29882e+09	2.47718e+09	2.49839e+09	2.45914e+09	3.01232e+09	2.85523e+09	2.80513e+09
High	High	IsMasterProtein	P14866	Heterogeneous nuclear ribonucleoprotein L OS=Homo sapiens GN=HNRNPL PE=1 SV=2	0	0	67	29	1005	28	1	589	64.1	8.22	24211	1129.62	27	19	1	2.75282e+09	2.90147e+09	2.78253e+09	2.82296e+09	2.7841e+09	2.93722e+09	3.02442e+09	3.04594e+09	2.96167e+09
High	High	IsMasterProtein	Q07157	Tight junction protein ZO-1 OS=Homo sapiens GN=TJP1 PE=1 SV=3	0	0	69	99	1201	98	1	1748	195.3	6.7	27762	1128.52	98	60	1	1.08864e+09	1.10474e+09	1.12144e+09	9.77665e+08	1.05013e+09	1.08379e+09	1.292e+09	1.32187e+09	1.26018e+09
High	High	IsMasterProteinCandidate	P19105	Myosin regulatory light chain 12A OS=Homo sapiens GN=MYL12A PE=1 SV=2	0	0	67	15	732	15	1	171	19.8	4.81	16646	1126.51	15	12	0	1.34784e+09	1.50536e+09	1.39728e+09	1.38993e+09	1.28064e+09	1.37424e+09	1.49272e+09	1.55883e+09	1.60899e+09
High	High	IsMasterProtein	O14950	Myosin regulatory light chain 12B OS=Homo sapiens GN=MYL12B PE=1 SV=2	0	0	66	15	732	15	1	172	19.8	4.84	16646	1126.51	15	12	0	1.34784e+09	1.50536e+09	1.39728e+09	1.38993e+09	1.28064e+09	1.37424e+09	1.49272e+09	1.55883e+09	1.60899e+09
High	High	IsMasterProtein	O60664	Perilipin-3 OS=Homo sapiens GN=PLIN3 PE=1 SV=3	0	0	78	24	748	24	1	434	47	5.44	20412	1123.17	24	14	0	8.81419e+08	8.8423e+08	8.95054e+08	9.03073e+08	9.49609e+08	9.50198e+08	1.06868e+09	1.17214e+09	1.14468e+09	Acetyl [N-Term]
High	High	IsMasterProtein	P67809	Nuclease-sensitive element-binding protein 1 OS=Homo sapiens GN=YBX1 PE=1 SV=3	0	0	73	26	1257	20	1	324	35.9	9.88	37456	1119.17	25	18	6	2.83809e+09	2.75384e+09	2.92087e+09	2.59855e+09	2.7714e+09	2.78581e+09	2.98427e+09	3.4104e+09	2.9669e+09	Acetyl [N-Term]
High	High	IsMasterProtein	P55209	Nucleosome assembly protein 1-like 1 OS=Homo sapiens GN=NAP1L1 PE=1 SV=1	0	0	52	22	789	20	1	391	45.3	4.46	15320	1112.4	21	13	2	1.83451e+09	1.90591e+09	1.81727e+09	1.90835e+09	1952344957	1.91689e+09	2.49865e+09	2.56587e+09	2.57665e+09	Acetyl [N-Term]
High	High	IsMasterProtein	P39023	60S ribosomal protein L3 OS=Homo sapiens GN=RPL3 PE=1 SV=2	0	0	54	28	1018	28	1	403	46.1	10.18	23450	1110.73	28	12	0	4.19393e+09	4.21355e+09	4.46839e+09	4.88171e+09	5.06e+09	4.98568e+09	5.86324e+09	5.78017e+09	5.3873e+09
High	High	IsMasterProtein	Q9UMS4	Pre-mRNA-processing factor 19 OS=Homo sapiens GN=PRPF19 PE=1 SV=1	0	0	75	23	722	23	1	504	55.1	6.61	13156	1110.44	23	12	0	1.25941e+09	1.28841e+09	1.31204e+09	1.3279e+09	1.42003e+09	1.42061e+09	1.42422e+09	1.50751e+09	1.37701e+09	Acetyl [N-Term]
High	High	IsMasterProtein	Q14008	Cytoskeleton-associated protein 5 OS=Homo sapiens GN=CKAP5 PE=1 SV=3	0	0	55	107	1304	107	1	2032	225.4	7.8	29663	1109.47	107	54	0	1.03874e+09	1.02856e+09	1.01115e+09	1.07963e+09	1.10568e+09	1.08979e+09	1.18891e+09	1.21278e+09	1.13111e+09	Acetyl [N-Term]
High	High	IsMasterProtein	P26639	Threonine--tRNA ligase, cytoplasmic OS=Homo sapiens GN=TARS PE=1 SV=3	0	0	66	49	1113	47	1	723	83.4	6.67	24181	1107.52	49	28	2	2.60117e+09	2.63961e+09	2.74479e+09	2.9061e+09	2.97986e+09	2.96907e+09	3.74506e+09	3.92552e+09	3.84685e+09
High	High	IsMasterProtein	Q63HN8	E3 ubiquitin-protein ligase RNF213 OS=Homo sapiens GN=RNF213 PE=1 SV=3	0	0	39	170	1307	169	1	5207	591	6.48	29625	1106.78	167	65	1	4.70836e+08	5.03339e+08	4.97274e+08	5.32663e+08	5.34699e+08	5.54345e+08	5.60999e+08	5.71268e+08	5.42098e+08	Acetyl [N-Term]
High	High	IsMasterProtein	Q12905	Interleukin enhancer-binding factor 2 OS=Homo sapiens GN=ILF2 PE=1 SV=2	0	0	76	23	1035	23	1	390	43	5.26	21475	1104.9	23	18	0	2.15298e+09	2.14386e+09	2.20513e+09	2.13067e+09	2.2405e+09	2.24214e+09	2.60209e+09	2.5576e+09	2.46178e+09
High	High	IsMasterProtein	A6NNZ2	Tubulin beta-8 chain-like protein LOC260334 OS=Homo sapiens PE=1 SV=1	0	0	25	10	1824	1	1	444	49.5	4.86	51945	1104.67	10	6	0
High	High	IsMasterProtein	Q15393	Splicing factor 3B subunit 3 OS=Homo sapiens GN=SF3B3 PE=1 SV=4	0	0	50	47	1025	47	1	1217	135.5	5.26	24738	1100.58	47	27	0	1.48796e+09	1.54024e+09	1.54774e+09	1.51737e+09	1.59452e+09	1.59888e+09	1.7083e+09	1.74329e+09	1.61693e+09
High	High	IsMasterProtein	Q86UP2	Kinectin OS=Homo sapiens GN=KTN1 PE=1 SV=1	0	0	63	92	1252	91	1	1357	156.2	5.64	28731	1093.97	90	51	1	1.28802e+09	1.32207e+09	1.34623e+09	1.40913e+09	1.47171e+09	1.48048e+09	1.76135e+09	1.86717e+09	1.7459e+09
High	High	IsMasterProtein	P11940	Polyadenylate-binding protein 1 OS=Homo sapiens GN=PABPC1 PE=1 SV=2	0	0	71	40	1327	12	1	636	70.6	9.5	32299	1093.38	40	16	40	4.95172e+09	4.91215e+09	5.01996e+09	5.17846e+09	5.08388e+09	5.264e+09	5.75743e+09	5.91491e+09	5.77342e+09	Acetyl [N-Term]
High	High	IsMasterProtein	Q14697	Neutral alpha-glucosidase AB OS=Homo sapiens GN=GANAB PE=1 SV=3	0	0	56	51	1194	51	1	944	106.8	6.14	26186	1090.24	51	25	0	2551784323	2.55171e+09	2.62676e+09	2.3963e+09	2.55976e+09	2.59533e+09	2.77414e+09	2.87141e+09	2.60694e+09
High	High	IsMasterProtein	Q8IWZ3	Ankyrin repeat and KH domain-containing protein 1 OS=Homo sapiens GN=ANKHD1 PE=1 SV=1	0	0	43	70	794	54	1	2542	269.3	5.73	18156	1089.48	69	44	0	1.91014e+08	1.84957e+08	1.85653e+08	2.05984e+08	2.1867e+08	2.17805e+08	2.57952e+08	2.7356e+08	2.57342e+08	Acetyl [N-Term]
High	High	IsMasterProtein	Q10567	AP-1 complex subunit beta-1 OS=Homo sapiens GN=AP1B1 PE=1 SV=2	0	0	53	50	1042	27	1	949	104.6	5.06	22410	1087.3	49	28	0	5.33945e+08	5.96561e+08	5.75312e+08	6.4932e+08	6.3457e+08	6.47908e+08	7.16228e+08	7.19033e+08	6.35242e+08
High	High	IsMasterProtein	P31150	Rab GDP dissociation inhibitor alpha OS=Homo sapiens GN=GDI1 PE=1 SV=2	0	0	77	31	863	20	1	447	50.6	5.14	19122	1085.75	31	24	0	5.15161e+08	5.12655e+08	5.24202e+08	5.2856e+08	5.4472e+08	5.45504e+08	6.71175e+08	6.60039e+08	6.61846e+08
High	High	IsMasterProtein	P13798	Acylamino-acid-releasing enzyme OS=Homo sapiens GN=APEH PE=1 SV=4	0	0	57	31	855	31	1	732	81.2	5.48	19034	1079.79	29	19	0	1.71355e+09	1.71744e+09	1.75672e+09	1.77121e+09	1.85376e+09	1.87684e+09	2.22016e+09	2.39191e+09	2.2429e+09
High	High	IsMasterProtein	P23588	Eukaryotic translation initiation factor 4B OS=Homo sapiens GN=EIF4B PE=1 SV=2	0	0	66	46	1006	46	1	611	69.1	5.73	25113	1076.32	46	17	0	1.58653e+09	1.59112e+09	1.69694e+09	1.63098e+09	1.65775e+09	1.80168e+09	1.93551e+09	1.89691e+09	1.92953e+09
High	High	IsMasterProtein	P06454	Prothymosin alpha OS=Homo sapiens GN=PTMA PE=1 SV=2	0	0	39	8	1097	8	1	111	12.2	3.78	36008	1073.15	8	6	0	4.906e+09	5.2747e+09	5.13556e+09	4.52031e+09	5.02283e+09	5.41222e+09	4.55323e+09	4.79082e+09	4.92326e+09	Acetyl [N-Term]
High	High	IsMasterProtein	P63244	Receptor of activated protein C kinase 1 OS=Homo sapiens GN=RACK1 PE=1 SV=3	0	0	80	21	898	21	1	317	35.1	7.69	21429	1072.72	21	13	0	5.46399e+09	5.47496e+09	5.55684e+09	5.6945e+09	5.71305e+09	5.82744e+09	6.40011e+09	6.48747e+09	6.49245e+09	Acetyl [N-Term]
High	High	IsMasterProtein	P23396	40S ribosomal protein S3 OS=Homo sapiens GN=RPS3 PE=1 SV=2	0	0	84	23	960	23	1	243	26.7	9.66	19249	1071.33	23	10	0	4.67707e+09	4.8723e+09	4.9242e+09	5.21624e+09	5.42201e+09	5.00352e+09	5.88056e+09	6.02958e+09	5.75711e+09	Acetyl [N-Term]
High	High	IsMasterProtein	P12004	Proliferating cell nuclear antigen OS=Homo sapiens GN=PCNA PE=1 SV=1	0	0	74	17	720	17	1	261	28.8	4.69	15103	1061.78	17	9	0	2.76534e+09	2.64115e+09	2.82961e+09	2.52091e+09	2.66948e+09	2.79364e+09	2.24101e+09	2.37139e+09	2.098e+09
High	High	IsMasterProtein	P51858	Hepatoma-derived growth factor OS=Homo sapiens GN=HDGF PE=1 SV=1	0	0	75	23	1003	23	1	240	26.8	4.73	22957	1061.45	23	15	0	1.54384e+09	1.5215e+09	1.56843e+09	1.60008e+09	1.57475e+09	1.63529e+09	1.70588e+09	1.80216e+09	1.56982e+09
High	High	IsMasterProtein	P05455	Lupus La protein OS=Homo sapiens GN=SSB PE=1 SV=2	0	0	64	33	1062	33	1	408	46.8	7.12	26620	1058.93	32	22	0	2.51486e+09	2.59653e+09	2.55455e+09	2.39334e+09	2.64586e+09	2.61149e+09	3.17995e+09	3.2274e+09	3.10642e+09	Acetyl [N-Term]
High	High	IsMasterProtein	Q32MZ4	Leucine-rich repeat flightless-interacting protein 1 OS=Homo sapiens GN=LRRFIP1 PE=1 SV=2	0	0	65	46	921	45	1	808	89.2	4.65	24920	1054.58	46	29	2	8.43282e+08	8.85723e+08	8.70025e+08	8.49321e+08	9.12988e+08	8.7956e+08	5.31516e+08	5.67529e+08	5.4639e+08	Acetyl [N-Term]
High	High	IsMasterProtein	P42166	Lamina-associated polypeptide 2, isoform alpha OS=Homo sapiens GN=TMPO PE=1 SV=2	0	0	72	38	738	24	1	694	75.4	7.66	18166	1053.77	37	25	14	8.98088e+08	9.31421e+08	8.60221e+08	8.20237e+08	8.35887e+08	9.00318e+08	7.53028e+08	7.54831e+08	7.50382e+08
High	High	IsMasterProtein	P36578	60S ribosomal protein L4 OS=Homo sapiens GN=RPL4 PE=1 SV=5	0	0	58	33	901	33	1	427	47.7	11.06	17810	1050.02	33	15	0	4.77302e+09	5.07797e+09	5.17442e+09	5.24663e+09	5.59087e+09	5.28082e+09	6.29009e+09	6.47104e+09	6.33665e+09	Acetyl [N-Term]
High	High	IsMasterProtein	Q5VYK3	Proteasome-associated protein ECM29 homolog OS=Homo sapiens GN=ECM29 PE=1 SV=2	0	0	48	72	1050	72	1	1845	204.2	7.12	24866	1041.61	72	39	0	7.39661e+08	7.51586e+08	7.43185e+08	7.49537e+08	7.81653e+08	7.80303e+08	7.95586e+08	8.62721e+08	8.15293e+08	Acetyl [N-Term]
High	High	IsMasterProtein	Q92900	Regulator of nonsense transcripts 1 OS=Homo sapiens GN=UPF1 PE=1 SV=2	0	0	59	58	969	57	1	1129	124.3	6.61	21067	1038.76	58	34	1	1.01129e+09	1.06685e+09	1.04949e+09	1.08613e+09	1.08057e+09	1.12438e+09	1.2794e+09	1.25421e+09	1.19636e+09
High	High	IsMasterProtein	P36776	Lon protease homolog, mitochondrial OS=Homo sapiens GN=LONP1 PE=1 SV=2	0	0	45	37	853	37	1	959	106.4	6.39	19509	1034.49	37	24	0	8.14859e+08	8.47662e+08	8.58196e+08	8.686e+08	8.66744e+08	8.86582e+08	1.06981e+09	1.14738e+09	1.14425e+09
High	High	IsMasterProtein	Q15075	Early endosome antigen 1 OS=Homo sapiens GN=EEA1 PE=1 SV=2	0	0	63	85	930	85	1	1411	162.4	5.68	20731	1034.3	82	45	0	6.56418e+08	6.91559e+08	6.62129e+08	6.83412e+08	7.21716e+08	6.66317e+08	8.20123e+08	8.44081e+08	7.7897e+08
High	High	None	B5ME19	Eukaryotic translation initiation factor 3 subunit C-like protein OS=Homo sapiens GN=EIF3CL PE=3 SV=1	0	0	43	44	960	43	1	914	105.4	5.64	22799	1033.18	44	16	0	1.5917e+09	1.72028e+09	1.7172e+09	1.71872e+09	1.87428e+09	1.84753e+09	2.18541e+09	2.27949e+09	2.17199e+09
High	High	IsMasterProtein	P08473	Neprilysin OS=Homo sapiens GN=MME PE=1 SV=2	0	0	56	41	878	41	1	750	85.5	5.73	19473	1032.72	41	23	0	8.92761e+08	9.13084e+08	8.8119e+08	8.55423e+08	8.80911e+08	8.86671e+08	1.05174e+09	1.06542e+09	1.03683e+09
High	High	IsMasterProtein	O43776	Asparagine--tRNA ligase, cytoplasmic OS=Homo sapiens GN=NARS PE=1 SV=1	0	0	54	34	849	34	1	548	62.9	6.25	20026	1031.52	34	15	0	1.685e+09	1.75297e+09	1.85315e+09	1.81599e+09	1.95968e+09	1.91757e+09	2.08047e+09	2.14172e+09	2.19603e+09
High	High	IsMasterProtein	P63010	AP-2 complex subunit beta OS=Homo sapiens GN=AP2B1 PE=1 SV=1	0	0	56	52	1027	29	1	937	104.5	5.38	21331	1031.32	52	29	26	1.67219e+09	1.68814e+09	1.76552e+09	1.76101e+09	1.86304e+09	1.83461e+09	2.05816e+09	2.13234e+09	2.046e+09
High	High	IsMasterProtein	P35658	Nuclear pore complex protein Nup214 OS=Homo sapiens GN=NUP214 PE=1 SV=2	0	0	49	65	816	65	1	2090	213.5	7.47	19650	1028.98	64	42	0	3.57601e+08	3.7787e+08	3.7782e+08	3.74322e+08	3.87248e+08	3.83727e+08	4.53733e+08	4.60743e+08	4.32324e+08	Acetyl [N-Term]
High	High	IsMasterProtein	P35606	Coatomer subunit beta' OS=Homo sapiens GN=COPB2 PE=1 SV=2	0	0	59	45	902	45	1	906	102.4	5.27	20252	1025.86	44	31	0	1.16143e+09	1.25499e+09	1.18893e+09	1.18515e+09	1.22038e+09	1.23796e+09	1.39234e+09	1.41448e+09	1.28351e+09
High	High	IsMasterProtein	P19367	Hexokinase-1 OS=Homo sapiens GN=HK1 PE=1 SV=3	0	0	54	48	908	41	1	917	102.4	6.8	20224	1022.4	48	24	9	1.22883e+09	1.28862e+09	1.23202e+09	1.27702e+09	1.32052e+09	1.30958e+09	1.61027e+09	1.66599e+09	1.54358e+09
High	High	IsMasterProtein	P24752	Acetyl-CoA acetyltransferase, mitochondrial OS=Homo sapiens GN=ACAT1 PE=1 SV=1	0	0	67	25	690	25	1	427	45.2	8.85	16418	1019.39	25	13	0	1.33116e+09	1.39397e+09	1.45608e+09	1.37249e+09	1359412543	1.44913e+09	1.92955e+09	1.958e+09	1.83626e+09
High	High	IsMasterProtein	P45880	Voltage-dependent anion-selective channel protein 2 OS=Homo sapiens GN=VDAC2 PE=1 SV=2	0	0	67	17	773	17	1	294	31.5	7.56	20105	1018.28	17	9	0	1.7757e+09	1.70494e+09	1.69185e+09	1.55779e+09	1.53124e+09	1.62162e+09	1.59433e+09	1.58066e+09	1.54086e+09	Acetyl [N-Term]
High	High	IsMasterProtein	P04844	Dolichyl-diphosphooligosaccharide--protein glycosyltransferase subunit 2 OS=Homo sapiens GN=RPN2 PE=1 SV=3	0	0	47	20	581	20	1	631	69.2	5.69	13805	1017.65	20	16	0	5.46424e+08	5.46429e+08	5.86048e+08	5.41762e+08	5.51071e+08	5.28791e+08	6.09054e+08	6.26946e+08	5.88981e+08
High	High	IsMasterProtein	P21964	Catechol O-methyltransferase OS=Homo sapiens GN=COMT PE=1 SV=2	0	0	69	18	667	18	1	271	30	5.47	14547	1014.64	18	14	0	1.40817e+09	1.60488e+09	1.52689e+09	1.65609e+09	1.74641e+09	1.65901e+09	1.60182e+09	1.69719e+09	1.60964e+09
High	High	IsMasterProtein	Q01813	ATP-dependent 6-phosphofructokinase, platelet type OS=Homo sapiens GN=PFKP PE=1 SV=2	0	0	57	38	781	34	1	784	85.5	7.55	17662	1010.79	36	20	3	7.34755e+08	7.46602e+08	7.27289e+08	8.72906e+08	9.46616e+08	9.22195e+08	8.24051e+08	9.09816e+08	8.55229e+08	Acetyl [N-Term]
High	High	IsMasterProtein	Q14152	Eukaryotic translation initiation factor 3 subunit A OS=Homo sapiens GN=EIF3A PE=1 SV=1	0	0	70	120	1454	120	1	1382	166.5	6.79	31246	1007.23	119	36	0	3.24411e+09	3.37511e+09	3.32314e+09	3.33546e+09	3.47995e+09	3.53238e+09	4.12849e+09	4.13823e+09	3.95205e+09
High	High	IsMasterProtein	Q99798	Aconitate hydratase, mitochondrial OS=Homo sapiens GN=ACO2 PE=1 SV=2	0	0	64	40	750	40	1	780	85.4	7.61	18124	1006.93	40	25	0	9.19501e+08	9.44588e+08	9.07561e+08	8.78918e+08	8.84229e+08	9.41988e+08	1.26401e+09	1.29972e+09	1.26746e+09
High	High	IsMasterProtein	P27816	Microtubule-associated protein 4 OS=Homo sapiens GN=MAP4 PE=1 SV=3	0	0	73	68	1259	68	1	1152	120.9	5.43	30994	1002.81	68	31	0	1.964e+09	2.08543e+09	2.04339e+09	2.17378e+09	2.23868e+09	2.25146e+09	2708164333	2.89551e+09	2.71208e+09	Acetyl [N-Term]
High	High	IsMasterProtein	Q14126	Desmoglein-2 OS=Homo sapiens GN=DSG2 PE=1 SV=2	0	0	54	41	725	41	1	1118	122.2	5.24	17008	1001.2	39	27	0	4.41548e+08	4.56328e+08	4.44243e+08	3.98892e+08	4.3064e+08	4.19989e+08	5.95329e+08	5.68359e+08	5.62086e+08
High	High	IsMasterProtein	P49411	Elongation factor Tu, mitochondrial OS=Homo sapiens GN=TUFM PE=1 SV=2	0	0	75	35	857	35	1	452	49.5	7.61	18752	1000.14	35	22	0	1.85866e+09	1.87492e+09	1.8322e+09	1.74128e+09	1.73506e+09	1.89425e+09	2.54749e+09	2.58876e+09	2.45505e+09
High	High	IsMasterProtein	Q07065	Cytoskeleton-associated protein 4 OS=Homo sapiens GN=CKAP4 PE=1 SV=2	0	0	63	39	803	39	1	602	66	5.92	22063	994.05	38	23	0	1.04927e+09	1.04998e+09	1.04714e+09	1.01664e+09	1.09765e+09	1.06238e+09	1.44687e+09	1.50284e+09	1.45685e+09
High	High	IsMasterProtein	P35222	Catenin beta-1 OS=Homo sapiens GN=CTNNB1 PE=1 SV=1	0	0	63	38	848	33	1	781	85.4	5.86	22326	993.74	37	22	0	5.68362e+08	5.46747e+08	5.54e+08	5.68938e+08	5.94989e+08	6.18782e+08	4.18922e+08	4.5365e+08	4.25778e+08	Acetyl [N-Term]
High	High	IsMasterProtein	P29692	Elongation factor 1-delta OS=Homo sapiens GN=EEF1D PE=1 SV=5	0	0	82	27	819	24	1	281	31.1	5.01	22180	990.21	26	20	3	3.91136e+09	4013854375	3.80173e+09	3.75004e+09	3.77201e+09	4.03333e+09	4.28483e+09	4.29995e+09	4.13627e+09	Acetyl [N-Term]
High	High	IsMasterProtein	P55786	Puromycin-sensitive aminopeptidase OS=Homo sapiens GN=NPEPPS PE=1 SV=2	0	0	64	53	1034	53	1	919	103.2	5.72	23061	989.85	53	29	0	2.04624e+09	2.17925e+09	2.24822e+09	2.15636e+09	2.19954e+09	2.23057e+09	2.74347e+09	2.94036e+09	2.7413e+09
High	High	IsMasterProtein	P09972	Fructose-bisphosphate aldolase C OS=Homo sapiens GN=ALDOC PE=1 SV=2	0	0	83	30	755	25	1	364	39.4	6.87	17982	987.96	29	18	0	7.43919e+08	7.82852e+08	8.23893e+08	1.08532e+09	1.19182e+09	1.14612e+09	1.2241e+09	1.25003e+09	1.20062e+09
High	High	IsMasterProtein	Q9Y265	RuvB-like 1 OS=Homo sapiens GN=RUVBL1 PE=1 SV=1	0	0	73	30	741	30	1	456	50.2	6.42	16455	987.88	29	21	0	1.25971e+09	1.36388e+09	1.32779e+09	1.33128e+09	1.32226e+09	1.36312e+09	1.56193e+09	1.65116e+09	1.52914e+09
High	High	IsMasterProtein	Q14676	Mediator of DNA damage checkpoint protein 1 OS=Homo sapiens GN=MDC1 PE=1 SV=3	0	0	51	65	655	65	1	2089	226.5	5.47	13247	984.03	64	39	0	2.40048e+08	2.38674e+08	2.41246e+08	2.45094e+08	2.352e+08	2.68874e+08	2.10899e+08	2.23582e+08	2.05974e+08
High	High	IsMasterProtein	O75153	Clustered mitochondria protein homolog OS=Homo sapiens GN=CLUH PE=1 SV=2	0	0	59	63	906	63	1	1309	146.6	6.13	20746	977.67	63	32	0	8.50943e+08	8.9246e+08	8.68516e+08	8.57941e+08	8.83908e+08	9.10245e+08	1.12674e+09	1.18166e+09	1.10098e+09
High	High	IsMasterProtein	P82970	High mobility group nucleosome-binding domain-containing protein 5 OS=Homo sapiens GN=HMGN5 PE=1 SV=1	0	0	60	18	679	18	1	282	31.5	4.55	18056	977.45	17	11	0	1.74232e+08	2.04253e+08	2.00611e+08	1.79824e+08	1.80618e+08	1.88924e+08	2.14363e+08	2.25294e+08	2.15388e+08
High	High	IsMasterProtein	P62937	Peptidyl-prolyl cis-trans isomerase A OS=Homo sapiens GN=PPIA PE=1 SV=2	0	0	76	12	1347	9	1	165	18	7.81	37883	977.22	12	6	4	1.94394e+10	1.95927e+10	1.85887e+10	2.1705e+10	1.94623e+10	1.97498e+10	2.04659e+10	2.45389e+10	2.00192e+10	Acetyl [N-Term; N-Term]
High	High	IsMasterProtein	A0MZ66	Shootin-1 OS=Homo sapiens GN=SHTN1 PE=1 SV=4	0	0	71	48	770	48	1	631	71.6	5.33	15935	975.4	48	28	0	5.26858e+08	5.46994e+08	5.36111e+08	5.5725e+08	5.90692e+08	5.88751e+08	7.51701e+08	7.28593e+08	6.75325e+08	Acetyl [N-Term]
High	High	IsMasterProtein	Q3LXA3	Triokinase/FMN cyclase OS=Homo sapiens GN=TKFC PE=1 SV=2	0	0	66	29	747	29	1	575	58.9	7.49	17679	969.6	29	19	0	9.6146e+08	1.02318e+09	9.48885e+08	1.02815e+09	1.07587e+09	1.0463e+09	1.20101e+09	1.23711e+09	1.19388e+09
High	High	IsMasterProtein	Q14566	DNA replication licensing factor MCM6 OS=Homo sapiens GN=MCM6 PE=1 SV=1	0	0	57	46	879	46	1	821	92.8	5.41	20002	968.69	45	28	0	1.74854e+09	1.82013e+09	1.79138e+09	1.5715e+09	1.6518e+09	1.74583e+09	1.48033e+09	1.51787e+09	1.38546e+09	Acetyl [N-Term]
High	High	IsMasterProtein	P55884	Eukaryotic translation initiation factor 3 subunit B OS=Homo sapiens GN=EIF3B PE=1 SV=3	0	0	64	44	927	44	1	814	92.4	5	20868	962.26	44	24	0	1.81131e+09	1.88122e+09	1.9183e+09	1.73419e+09	1.83225e+09	1.83892e+09	2.03878e+09	2.12984e+09	1.99429e+09	Acetyl [N-Term]
High	High	IsMasterProtein	P07195	L-lactate dehydrogenase B chain OS=Homo sapiens GN=LDHB PE=1 SV=2	0	0	57	21	983	19	1	334	36.6	6.05	21879	960.84	20	12	0	4.98864e+09	4.87562e+09	5.17438e+09	4.98175e+09	5.29884e+09	5.42925e+09	5.49868e+09	5.63653e+09	5.40782e+09
High	High	IsMasterProtein	Q14166	Tubulin--tyrosine ligase-like protein 12 OS=Homo sapiens GN=TTLL12 PE=1 SV=2	0	0	73	39	726	39	1	644	74.4	5.53	15155	958.71	39	23	0	1.20591e+09	1.18093e+09	1.22116e+09	1.1308e+09	1.16163e+09	1.24956e+09	1.51493e+09	1.59048e+09	1.41461e+09	Acetyl [N-Term]
High	High	IsMasterProtein	Q9BWD1	Acetyl-CoA acetyltransferase, cytosolic OS=Homo sapiens GN=ACAT2 PE=1 SV=2	0	0	75	20	524	20	1	397	41.3	6.92	9822	958.41	19	14	0	7.12112e+08	7.93177e+08	7.67214e+08	7.52345e+08	8.50302e+08	7.87292e+08	8.71571e+08	9.11156e+08	8.3392e+08	Acetyl [N-Term]
High	High	IsMasterProtein	Q9NZB2	Constitutive coactivator of PPAR-gamma-like protein 1 OS=Homo sapiens GN=FAM120A PE=1 SV=2	0	0	63	51	759	49	1	1118	121.8	8.88	18047	949.78	51	32	2	4.75961e+08	5.16453e+08	5.0188e+08	5.296e+08	5.72927e+08	5.82848e+08	6.68651e+08	6.85026e+08	6.47332e+08
High	High	IsMasterProtein	P13637	Sodium/potassium-transporting ATPase subunit alpha-3 OS=Homo sapiens GN=ATP1A3 PE=1 SV=3	0	0	21	19	661	1	1	1013	111.7	5.38	16002	946.12	18	10	0	431343				237407
High	High	IsMasterProtein	P45974	Ubiquitin carboxyl-terminal hydrolase 5 OS=Homo sapiens GN=USP5 PE=1 SV=2	0	0	57	47	862	45	1	858	95.7	5.03	19874	942.68	47	29	2	1.17953e+09	1.23264e+09	1.22543e+09	1.20199e+09	1.28756e+09	1.28845e+09	1.62304e+09	1.59204e+09	1.53592e+09
High	High	IsMasterProtein	P62195	26S protease regulatory subunit 8 OS=Homo sapiens GN=PSMC5 PE=1 SV=1	0	0	71	29	759	27	1	406	45.6	7.55	19880	942.37	28	17	0	1.06715e+09	1.11439e+09	1.18136e+09	1.12902e+09	1.1757e+09	1.15594e+09	1.22341e+09	1.1997e+09	1.13294e+09	Acetyl [N-Term]
High	High	IsMasterProtein	Q9NSD9	Phenylalanine--tRNA ligase beta subunit OS=Homo sapiens GN=FARSB PE=1 SV=3	0	0	65	36	766	36	1	589	66.1	6.84	16923	942.31	36	20	0	1.5753e+09	1.64123e+09	1.55867e+09	1.65079e+09	1.66021e+09	1.71247e+09	2.02745e+09	2.16021e+09	1.92954e+09
High	High	IsMasterProtein	O00567	Nucleolar protein 56 OS=Homo sapiens GN=NOP56 PE=1 SV=4	0	0	65	36	707	36	1	594	66	9.19	16419	940.39	35	21	0	6.16268e+08	6.54708e+08	6.37763e+08	8.00932e+08	8.23154e+08	7.99311e+08	9.50085e+08	9.71004e+08	9.39762e+08
High	High	IsMasterProtein	P08237	ATP-dependent 6-phosphofructokinase, muscle type OS=Homo sapiens GN=PFKM PE=1 SV=2	0	0	56	38	853	35	1	780	85.1	7.99	21042	938.55	38	18	4	1.24151e+09	1.29028e+09	1.32295e+09	1.26916e+09	1.29016e+09	1.36417e+09	1.67737e+09	1.78795e+09	1.60884e+09	Acetyl [N-Term; N-Term]
High	High	IsMasterProtein	P23526	Adenosylhomocysteinase OS=Homo sapiens GN=AHCY PE=1 SV=4	0	0	56	27	983	26	1	432	47.7	6.34	24563	937.18	27	13	0	4.89549e+09	4.99198e+09	4.95266e+09	4.99468e+09	5.10951e+09	5.18645e+09	6.27084e+09	6.57241e+09	6.00347e+09	Acetyl [N-Term]
High	High	IsMasterProtein	Q9UQE7	Structural maintenance of chromosomes protein 3 OS=Homo sapiens GN=SMC3 PE=1 SV=2	0	0	54	77	970	76	1	1217	141.5	7.18	23843	936.8	75	39	1	7.89948e+08	8.07517e+08	8.10834e+08	7.17768e+08	7.63794e+08	7.52277e+08	7.22198e+08	7.31291e+08	6.81321e+08
High	High	IsMasterProtein	Q9NR30	Nucleolar RNA helicase 2 OS=Homo sapiens GN=DDX21 PE=1 SV=5	0	0	63	51	872	49	1	783	87.3	9.28	19676	936.59	51	30	2	1.00759e+09	1.08849e+09	1.04134e+09	1.12771e+09	1.10905e+09	1.14725e+09	1.33478e+09	1.39789e+09	1.28754e+09
n/a	High	None	Q16822	Phosphoenolpyruvate carboxykinase [GTP], mitochondrial OS=Homo sapiens GN=PCK2 PE=1 SV=3		0	42	19	236	45	1	640	70.7	7.62		932.43		19	0	1.17745e+09	1.17402e+09	1.20354e+09	1.28746e+09	1.36716e+09	1.41322e+09	1.42507e+09	1.45802e+09	1.45364e+09
High	High	IsMasterProtein	P35232	Prohibitin OS=Homo sapiens GN=PHB PE=1 SV=1	0	0	83	20	660	20	1	272	29.8	5.76	17245	931.48	20	10	0	1.37313e+09	1.56441e+09	1.55133e+09	1.90607e+09	2.02223e+09	1.97244e+09	2.10659e+09	2.12534e+09	1.94825e+09
High	High	IsMasterProtein	P02545	Prelamin-A/C OS=Homo sapiens GN=LMNA PE=1 SV=1	0	0	79	59	1217	58	1	664	74.1	7.02	31432	929.89	58	27	1	3.41902e+09	3.57919e+09	3.53923e+09	3.60615e+09	3.83425e+09	3.71756e+09	4.04067e+09	4.28595e+09	4.09943e+09	Acetyl [N-Term]
High	High	IsMasterProtein	P61011	Signal recognition particle 54 kDa protein OS=Homo sapiens GN=SRP54 PE=1 SV=1	0	0	59	28	760	28	1	504	55.7	8.75	17145	928	27	20	0	6.91981e+08	7.09339e+08	7.03712e+08	7.59166e+08	7.93655e+08	7.77593e+08	9.07066e+08	9.50665e+08	9.17642e+08
High	High	IsMasterProtein	Q9NY33	Dipeptidyl peptidase 3 OS=Homo sapiens GN=DPP3 PE=1 SV=2	0	0	60	34	643	34	1	737	82.5	5.1	13541	926.63	34	15	0	5.66743e+08	5.91907e+08	5.47355e+08	6.18275e+08	6.21804e+08	5.91667e+08	5.50203e+08	6.04686e+08	5.61711e+08	Acetyl [N-Term]
High	High	IsMasterProtein	Q1KMD3	Heterogeneous nuclear ribonucleoprotein U-like protein 2 OS=Homo sapiens GN=HNRNPUL2 PE=1 SV=1	0	0	54	43	833	43	1	747	85.1	4.91	21165	922.83	42	22	0	1.02741e+09	1.04333e+09	1.02956e+09	1.06592e+09	1.03824e+09	1.09808e+09	1.22415e+09	1.22331e+09	1.15639e+09
High	High	IsMasterProtein	P22234	Multifunctional protein ADE2 OS=Homo sapiens GN=PAICS PE=1 SV=3	0	0	63	25	795	25	1	425	47	7.23	19261	919.91	25	10	0	3.42112e+09	3.51171e+09	3.48028e+09	3.65045e+09	3.66073e+09	3.85445e+09	4.39083e+09	4.24406e+09	3.968e+09	Acetyl [N-Term]
High	High	IsMasterProtein	Q8N163	Cell cycle and apoptosis regulator protein 2 OS=Homo sapiens GN=CCAR2 PE=1 SV=2	0	0	67	58	887	58	1	923	102.8	5.22	22161	917.68	57	33	0	1.0411e+09	1.05138e+09	1.07157e+09	1.05972e+09	1.07864e+09	1.15082e+09	1.21846e+09	1.24292e+09	1.13059e+09
High	High	IsMasterProtein	P16989	Y-box-binding protein 3 OS=Homo sapiens GN=YBX3 PE=1 SV=4	0	0	73	21	672	15	1	372	40.1	9.77	19193	917.46	21	11	0	5.33921e+08	4.84657e+08	4.90412e+08	4.15351e+08	4.59734e+08	4.49105e+08	5.21851e+08	5.31812e+08	5.24288e+08	Acetyl [N-Term]
High	High	IsMasterProtein	Q8NC51	Plasminogen activator inhibitor 1 RNA-binding protein OS=Homo sapiens GN=SERBP1 PE=1 SV=2	0	0	60	34	873	34	1	408	44.9	8.65	19389	913.44	32	19	0	2.88505e+09	3.02023e+09	3.08283e+09	2.6968e+09	2.88704e+09	3.01499e+09	2.9528e+09	3.13512e+09	2.74667e+09
High	High	IsMasterProtein	P14868	Aspartate--tRNA ligase, cytoplasmic OS=Homo sapiens GN=DARS PE=1 SV=2	0	0	75	41	1066	41	1	501	57.1	6.55	27032	912.66	41	20	0	1.99013e+09	2.01976e+09	2.01841e+09	2.1148e+09	2.12114e+09	2.1569e+09	2.53593e+09	2.58491e+09	2.51124e+09
High	High	IsMasterProtein	P28331	NADH-ubiquinone oxidoreductase 75 kDa subunit, mitochondrial OS=Homo sapiens GN=NDUFS1 PE=1 SV=3	0	0	71	41	736	41	1	727	79.4	6.23	15846	912.44	40	23	0	4.7119e+08	4.73365e+08	4.72569e+08	4.76908e+08	4.76123e+08	4.91269e+08	6.41923e+08	6.44773e+08	6.04867e+08
High	High	IsMasterProtein	O15371	Eukaryotic translation initiation factor 3 subunit D OS=Homo sapiens GN=EIF3D PE=1 SV=1	0	0	63	32	747	32	1	548	63.9	6.05	16104	911.58	32	22	0	7.71681e+08	7.51186e+08	8.17846e+08	8.5034e+08	8.50823e+08	9.06974e+08	9.73907e+08	1.00074e+09	9.35307e+08
High	High	IsMasterProtein	Q12904	Aminoacyl tRNA synthase complex-interacting multifunctional protein 1 OS=Homo sapiens GN=AIMP1 PE=1 SV=2	0	0	80	25	684	25	1	312	34.3	8.43	15608	910.42	25	15	0	8.83127e+08	9.08501e+08	9.54064e+08	9.22316e+08	9.96308e+08	9.89255e+08	1.22686e+09	1.26062e+09	1.14552e+09	Acetyl [N-Term]
High	High	IsMasterProtein	O60841	Eukaryotic translation initiation factor 5B OS=Homo sapiens GN=EIF5B PE=1 SV=4	0	0	45	70	914	70	1	1220	138.7	5.49	20892	910.25	69	39	0	1.03124e+09	1.08243e+09	1.07439e+09	1.07812e+09	1.06724e+09	1.14077e+09	1.3603e+09	1.38493e+09	1.32102e+09
High	High	IsMasterProtein	P07910	Heterogeneous nuclear ribonucleoproteins C1/C2 OS=Homo sapiens GN=HNRNPC PE=1 SV=4	0	0	59	23	1025	22	1	306	33.7	5.08	27075	909.42	23	13	1	6.57274e+09	6.4181e+09	6.46514e+09	6.64892e+09	6.69035e+09	6.947e+09	6.98263e+09	7.00708e+09	6.57471e+09
High	High	IsMasterProtein	O75367	Core histone macro-H2A.1 OS=Homo sapiens GN=H2AFY PE=1 SV=4	0	0	51	21	656	19	1	372	39.6	9.79	16315	908.61	21	12	2	1.63523e+09	1.71334e+09	1.69695e+09	1.84841e+09	1.87201e+09	1.84476e+09	2.04218e+09	2.07981e+09	2.00584e+09
High	High	IsMasterProtein	P55795	Heterogeneous nuclear ribonucleoprotein H2 OS=Homo sapiens GN=HNRNPH2 PE=1 SV=1	0	0	52	20	717	11	1	449	49.2	6.3	17105	905.1	20	9	0	3.77006e+08	4.07653e+08	4.189e+08	4.76472e+08	4.82775e+08	4.85604e+08	5.44359e+08	5.77429e+08	5.71439e+08	Acetyl [N-Term; N-Term]
High	High	IsMasterProtein	Q13151	Heterogeneous nuclear ribonucleoprotein A0 OS=Homo sapiens GN=HNRNPA0 PE=1 SV=1	0	0	52	12	571	11	1	305	30.8	9.29	14065	904.93	12	8	0	7.65222e+08	7.45347e+08	8.61165e+08	7.3694e+08	8.26278e+08	8.7318e+08	9.96708e+08	1.03237e+09	8.96534e+08	Acetyl [N-Term]
High	High	IsMasterProtein	P46821	Microtubule-associated protein 1B OS=Homo sapiens GN=MAP1B PE=1 SV=2	0	0	51	85	847	83	1	2468	270.5	4.81	19182	904.33	85	48	2	1.77246e+08	1.85268e+08	1.86724e+08	2.53361e+08	2.55165e+08	2.72241e+08	3.65398e+08	3.83084e+08	3.66298e+08	Acetyl [N-Term]
High	High	IsMasterProtein	Q9UQ80	Proliferation-associated protein 2G4 OS=Homo sapiens GN=PA2G4 PE=1 SV=3	0	0	74	29	1093	29	1	394	43.8	6.55	30865	903.84	28	14	0	4.15295e+09	4.28511e+09	4.35984e+09	4.01829e+09	4.04987e+09	4.25136e+09	4.57514e+09	4.73654e+09	4.45285e+09	Acetyl [N-Term]
High	High	IsMasterProtein	O95359	Transforming acidic coiled-coil-containing protein 2 OS=Homo sapiens GN=TACC2 PE=1 SV=3	0	0	55	97	754	94	1	2948	309.2	4.79	15442	901.74	94	59	4	1.73478e+08	1.86198e+08	1.89857e+08	2.07636e+08	2.18662e+08	2.1654e+08	2.31605e+08	2.4195e+08	2.26183e+08
High	High	IsMasterProtein	P38606	V-type proton ATPase catalytic subunit A OS=Homo sapiens GN=ATP6V1A PE=1 SV=2	0	0	71	36	790	36	1	617	68.3	5.52	18423	901.65	35	21	0	1.21582e+09	1.2993e+09	1.2264e+09	1.27037e+09	1.34833e+09	1.34883e+09	1.40885e+09	1.43031e+09	1.43865e+09
High	High	IsMasterProtein	O00267	Transcription elongation factor SPT5 OS=Homo sapiens GN=SUPT5H PE=1 SV=1	0	0	53	48	696	48	1	1087	120.9	5.06	16271	899.59	47	29	0	3.83599e+08	4.02808e+08	3.902e+08	3.62848e+08	3.84528e+08	3.83563e+08	4.62445e+08	4.55292e+08	4.34645e+08
High	High	IsMasterProtein	Q9Y230	RuvB-like 2 OS=Homo sapiens GN=RUVBL2 PE=1 SV=3	0	0	69	33	771	33	1	463	51.1	5.64	19276	896.43	32	19	0	1.45173e+09	1.46343e+09	1.40038e+09	1.41969e+09	1.45832e+09	1485323910	1.68464e+09	1.71364e+09	1.61128e+09	Acetyl [N-Term]
High	High	IsMasterProtein	P41250	Glycine--tRNA ligase OS=Homo sapiens GN=GARS PE=1 SV=3	0	0	56	37	886	37	1	739	83.1	7.03	18702	892.44	37	21	0	1.96567e+09	2.10292e+09	2.0867e+09	2.6569e+09	2.6924e+09	2.65456e+09	2.85319e+09	2.94518e+09	2.74618e+09
High	High	IsMasterProtein	Q96A49	Synapse-associated protein 1 OS=Homo sapiens GN=SYAP1 PE=1 SV=1	0	0	59	22	482	22	1	352	39.9	4.53	11243	892.42	22	15	0	2.63506e+08	2.52395e+08	2.56683e+08	2.76961e+08	3.08204e+08	2.88123e+08	4.15124e+08	4.22832e+08	3.98614e+08
High	High	IsMasterProtein	P27824	Calnexin OS=Homo sapiens GN=CANX PE=1 SV=2	0	0	49	39	887	39	1	592	67.5	4.6	21905	892.09	39	21	0	1.52194e+09	1.54732e+09	1.54766e+09	1.69311e+09	1.70124e+09	1.70153e+09	1.98955e+09	1.98122e+09	1.96675e+09
High	High	IsMasterProtein	P08243	Asparagine synthetase [glutamine-hydrolyzing] OS=Homo sapiens GN=ASNS PE=1 SV=4	0	0	63	32	894	32	1	561	64.3	6.86	19512	891.71	31	16	0	1.48122e+09	1.56771e+09	1.56744e+09	2.01361e+09	1.99659e+09	2.09056e+09	2.1437e+09	2.16261e+09	2.06268e+09
High	High	IsMasterProtein	O75874	Isocitrate dehydrogenase [NADP] cytoplasmic OS=Homo sapiens GN=IDH1 PE=1 SV=2	0	0	67	24	1009	22	1	414	46.6	7.01	26915	890.45	24	13	0	2.78239e+09	3.1594e+09	3.17712e+09	3434693419	3.71918e+09	3.71521e+09	4.38344e+09	4.59213e+09	4.55806e+09
High	High	IsMasterProtein	Q9NYU2	UDP-glucose:glycoprotein glucosyltransferase 1 OS=Homo sapiens GN=UGGT1 PE=1 SV=3	0	0	44	55	744	54	1	1555	177.1	5.63	15876	890.42	54	28	1	5.65594e+08	5.68839e+08	5.48327e+08	5.71026e+08	5.61804e+08	5.73069e+08	6.4538e+08	6.16746e+08	6.19283e+08
High	High	IsMasterProtein	P25398	40S ribosomal protein S12 OS=Homo sapiens GN=RPS12 PE=1 SV=3	0	0	71	9	770	9	1	132	14.5	7.21	19800	888.77	9	5	0	2.43412e+09	2.52044e+09	2.73222e+09	2.54536e+09	2.4891e+09	2.83923e+09	3.10782e+09	3.29477e+09	3.20124e+09	Acetyl [N-Term]
High	High	IsMasterProtein	P08133	Annexin A6 OS=Homo sapiens GN=ANXA6 PE=1 SV=3	0	0	67	50	959	50	1	673	75.8	5.6	21978	886.37	50	21	0	2.54182e+09	2.61989e+09	2.61707e+09	2.48709e+09	2.46244e+09	2.59952e+09	2.93207e+09	3.06334e+09	2.84134e+09
High	High	IsMasterProtein	P26196	Probable ATP-dependent RNA helicase DDX6 OS=Homo sapiens GN=DDX6 PE=1 SV=2	0	0	69	29	709	29	1	483	54.4	8.66	16818	886.12	29	18	0	8.11977e+08	839855396	8.0119e+08	8.21946e+08	8.66273e+08	8.62251e+08	9.93609e+08	1.01748e+09	9.4679e+08
High	High	IsMasterProtein	P46777	60S ribosomal protein L5 OS=Homo sapiens GN=RPL5 PE=1 SV=3	0	0	59	17	863	17	1	297	34.3	9.72	18141	883.71	17	11	0	3.02372e+09	3.12956e+09	2.96709e+09	3.06667e+09	3.13929e+09	3.29089e+09	3.54648e+09	3.88393e+09	3.57378e+09
High	High	IsMasterProtein	P46459	Vesicle-fusing ATPase OS=Homo sapiens GN=NSF PE=1 SV=3	0	0	63	44	776	43	1	744	82.5	6.95	17218	883.6	44	26	2	1.09962e+09	1.13925e+09	1.15331e+09	1.20821e+09	1.28239e+09	1.22998e+09	1.29187e+09	1.31797e+09	1.25574e+09
High	High	IsMasterProtein	P04843	Dolichyl-diphosphooligosaccharide--protein glycosyltransferase subunit 1 OS=Homo sapiens GN=RPN1 PE=1 SV=1	0	0	62	36	713	36	1	607	68.5	6.38	15983	881.72	35	21	0	1.517e+09	1.64162e+09	1.62714e+09	1.54551e+09	1.66851e+09	1.60859e+09	2.00005e+09	1.9439e+09	1.89273e+09
High	High	IsMasterProtein	Q8WVM8	Sec1 family domain-containing protein 1 OS=Homo sapiens GN=SCFD1 PE=1 SV=4	0	0	54	32	700	32	1	642	72.3	6.27	18864	880.93	32	16	0	4.64e+08	4.96084e+08	4.8129e+08	4.91153e+08	5.03247e+08	5.16706e+08	5.72609e+08	6.12746e+08	5.77114e+08	Acetyl [N-Term]
High	High	IsMasterProtein	O00571	ATP-dependent RNA helicase DDX3X OS=Homo sapiens GN=DDX3X PE=1 SV=3	0	0	67	46	1111	17	1	662	73.2	7.18	28388	880.48	46	23	36	2.38986e+09	2.40876e+09	2.44121e+09	2.27719e+09	2.23114e+09	2.31188e+09	2.69926e+09	2.91152e+09	2.71454e+09	Acetyl [N-Term]
High	High	IsMasterProtein	Q16881	Thioredoxin reductase 1, cytoplasmic OS=Homo sapiens GN=TXNRD1 PE=1 SV=3	0	0	58	26	590	25	1	649	70.9	7.39	12103	878.31	26	18	1	9.30751e+08	1.03691e+09	9.87139e+08	1.1035e+09	1.20329e+09	1.1461e+09	1.37087e+09	1.35299e+09	1.2774e+09
High	High	IsMasterProtein	P30153	Serine/threonine-protein phosphatase 2A 65 kDa regulatory subunit A alpha isoform OS=Homo sapiens GN=PPP2R1A PE=1 SV=4	0	0	59	32	905	24	1	589	65.3	5.11	23237	876.8	32	16	9	2.61609e+09	2.89284e+09	2.75506e+09	2.68426e+09	2.68826e+09	2.76412e+09	3.29236e+09	3.2968e+09	3.2076e+09	Acetyl [N-Term]
High	High	IsMasterProtein	P54577	Tyrosine--tRNA ligase, cytoplasmic OS=Homo sapiens GN=YARS PE=1 SV=4	0	0	78	46	930	46	1	528	59.1	7.05	20684	875.63	46	22	0	1.90124e+09	1.98016e+09	1.93432e+09	2.26868e+09	2.42408e+09	2.31952e+09	2.59506e+09	2.7414e+09	2.54735e+09	Acetyl [N-Term]
High	High	IsMasterProtein	P19338	Nucleolin OS=Homo sapiens GN=NCL PE=1 SV=3	0	0	38	32	1296	32	1	710	76.6	4.7	32793	875.01	32	11	0	1.0769e+10	1.10163e+10	1.04107e+10	1.06427e+10	1.13014e+10	1.12844e+10	1.29508e+10	1.2677e+10	1.20833e+10
High	High	IsMasterProtein	P31040	Succinate dehydrogenase [ubiquinone] flavoprotein subunit, mitochondrial OS=Homo sapiens GN=SDHA PE=1 SV=2	0	0	59	27	707	27	1	664	72.6	7.39	17691	873.7	26	18	0	6.38143e+08	6.60057e+08	6.15019e+08	5.69825e+08	6.10824e+08	5.84701e+08	818391184	7.9669e+08	7.63201e+08
High	High	IsMasterProtein	P51610	Host cell factor 1 OS=Homo sapiens GN=HCFC1 PE=1 SV=2	0	0	40	60	771	59	1	2035	208.6	7.46	16962	872.62	59	35	1	5.37984e+08	5.78095e+08	5.58465e+08	5.39999e+08	5.55727e+08	5.6326e+08	6.48971e+08	6.60116e+08	6.21997e+08	Acetyl [N-Term]
High	High	IsMasterProtein	P27695	DNA-(apurinic or apyrimidinic site) lyase OS=Homo sapiens GN=APEX1 PE=1 SV=2	0	0	68	22	534	22	1	318	35.5	8.12	11547	870.66	22	17	0	1.77328e+09	1.85547e+09	1.77047e+09	1.86554e+09	1.91655e+09	2.04228e+09	1.75059e+09	1.77024e+09	1.6795e+09
High	High	IsMasterProtein	Q7L014	Probable ATP-dependent RNA helicase DDX46 OS=Homo sapiens GN=DDX46 PE=1 SV=2	0	0	54	61	878	61	1	1031	117.3	9.29	20259	870.17	61	25	0	6.25469e+08	6.428e+08	6.23956e+08	6.10268e+08	6.28259e+08	6.26232e+08	7.72752e+08	7.74938e+08	7.52771e+08
High	High	IsMasterProtein	Q06830	Peroxiredoxin-1 OS=Homo sapiens GN=PRDX1 PE=1 SV=1	0	0	74	20	929	16	1	199	22.1	8.13	19737	868.77	20	12	4	1.42379e+10	1.5133e+10	1.43903e+10	1.42317e+10	1.50576e+10	1.53845e+10	1.70824e+10	1.73366e+10	1.75271e+10
High	High	IsMasterProtein	P28074	Proteasome subunit beta type-5 OS=Homo sapiens GN=PSMB5 PE=1 SV=3	0	0	66	16	592	16	1	263	28.5	6.92	13471	867.91	16	12	0	9.70966e+08	9.24841e+08	9.05155e+08	9.1624e+08	1.00368e+09	9.95275e+08	1.20944e+09	1.29609e+09	1.17505e+09	Acetyl [N-Term]
High	High	IsMasterProtein	P13693	Translationally-controlled tumor protein OS=Homo sapiens GN=TPT1 PE=1 SV=1	0	0	67	9	575	9	1	172	19.6	4.93	12859	865.39	9	7	0	1.53969e+09	1.53413e+09	1.53976e+09	1.56301e+09	1.70001e+09	1.52431e+09	1.75901e+09	1.82731e+09	1.66945e+09
High	High	IsMasterProtein	P04792	Heat shock protein beta-1 OS=Homo sapiens GN=HSPB1 PE=1 SV=2	0	0	87	19	656	19	1	205	22.8	6.4	14209	864.3	18	11	0	5.74188e+09	5.94555e+09	5.69164e+09	5.69172e+09	5.54186e+09	6.17267e+09	5.42916e+09	5.84751e+09	5.39473e+09
High	High	IsMasterProtein	P13796	Plastin-2 OS=Homo sapiens GN=LCP1 PE=1 SV=6	0	0	75	42	815	33	1	627	70.2	5.43	18936	864.29	42	27	10	1.40444e+09	1.44177e+09	1.37428e+09	1.47486e+09	1.47132e+09	1.52694e+09	1.4567e+09	1.49228e+09	1.45397e+09
High	High	IsMasterProtein	O76094	Signal recognition particle subunit SRP72 OS=Homo sapiens GN=SRP72 PE=1 SV=3	0	0	68	39	723	39	1	671	74.6	9.26	18251	864.27	37	20	0	7.29353e+08	7.54061e+08	7.65935e+08	8.05212e+08	8.49202e+08	8.66028e+08	9.85242e+08	1.01349e+09	9.36571e+08	Acetyl [N-Term]
High	High	IsMasterProtein	P61221	ATP-binding cassette sub-family E member 1 OS=Homo sapiens GN=ABCE1 PE=1 SV=1	0	0	61	36	620	36	1	599	67.3	8.34	13108	863.97	36	21	0	8.13883e+08	9.46738e+08	8.93391e+08	8.68021e+08	9.1625e+08	8.85585e+08	1.10805e+09	1.17414e+09	1.06988e+09
High	High	IsMasterProtein	Q9NTJ3	Structural maintenance of chromosomes protein 4 OS=Homo sapiens GN=SMC4 PE=1 SV=2	0	0	52	66	824	66	1	1288	147.1	6.79	19146	858.58	65	37	0	6.82582e+08	7.3608e+08	7.05541e+08	6.21208e+08	6.15768e+08	6.66757e+08	5.63136e+08	5.87217e+08	5.43879e+08
High	High	IsMasterProtein	P20290	Transcription factor BTF3 OS=Homo sapiens GN=BTF3 PE=1 SV=1	0	0	71	14	553	14	1	206	22.2	9.38	12915	856.58	14	6	0	5.31504e+08	5.49728e+08	5.42123e+08	5.83075e+08	5.54828e+08	6.04076e+08	6.72774e+08	6.96474e+08	6.94594e+08
High	High	IsMasterProtein	P18669	Phosphoglycerate mutase 1 OS=Homo sapiens GN=PGAM1 PE=1 SV=2	0	0	69	17	736	17	1	254	28.8	7.18	15530	853.7	17	13	0	4.03579e+09	4.62202e+09	5.00678e+09	5.41287e+09	5.79542e+09	6.03632e+09	5.79283e+09	6.25655e+09	5.91653e+09
High	High	IsMasterProtein	P55265	Double-stranded RNA-specific adenosine deaminase OS=Homo sapiens GN=ADAR PE=1 SV=4	0	0	57	59	885	59	1	1226	136	8.65	21571	853.61	59	23	0	9.347e+08	9.74063e+08	9.82738e+08	9.27752e+08	9.52424e+08	9.67654e+08	1.02446e+09	1.08553e+09	1.03382e+09
High	High	IsMasterProtein	P32119	Peroxiredoxin-2 OS=Homo sapiens GN=PRDX2 PE=1 SV=5	0	0	67	18	719	17	1	198	21.9	5.97	14800	853.47	18	11	0	4.3596e+09	4.58397e+09	4.95731e+09	4.76824e+09	5.00636e+09	5.00586e+09	5.61652e+09	5.73486e+09	5.32747e+09
High	High	IsMasterProtein	P00441	Superoxide dismutase [Cu-Zn] OS=Homo sapiens GN=SOD1 PE=1 SV=2	0	0	60	7	504	7	1	154	15.9	6.13	12192	853	7	6	0	1.78062e+09	1.96864e+09	1.77531e+09	2.09509e+09	2.14817e+09	2.27164e+09	2.33687e+09	2.77341e+09	2.60287e+09
High	High	IsMasterProtein	P11047	Laminin subunit gamma-1 OS=Homo sapiens GN=LAMC1 PE=1 SV=3	0	0	54	63	746	63	1	1609	177.5	5.12	17709	852.43	63	43	0	2.743e+08	2.79236e+08	2.93211e+08	3.67567e+08	3.8292e+08	3.93041e+08	5.25066e+08	5.22446e+08	4.91666e+08
High	High	IsMasterProtein	O00231	26S proteasome non-ATPase regulatory subunit 11 OS=Homo sapiens GN=PSMD11 PE=1 SV=3	0	0	72	30	752	30	1	422	47.4	6.48	17015	848.9	30	16	0	1.51456e+09	1.62331e+09	1.57083e+09	1.59894e+09	1.66233e+09	1.74026e+09	1.93675e+09	2.07802e+09	1.91658e+09	Acetyl [N-Term]
High	High	IsMasterProtein	P48634	Protein PRRC2A OS=Homo sapiens GN=PRRC2A PE=1 SV=3	0	0	50	78	823	74	1	2157	228.7	9.45	18764	845.27	77	44	0	3.3486e+08	3.52808e+08	3.41027e+08	3.2803e+08	3.42636e+08	3.3586e+08	3.70656e+08	3.7634e+08	3.60939e+08
High	High	IsMasterProtein	P35749	Myosin-11 OS=Homo sapiens GN=MYH11 PE=1 SV=3	0	0	15	32	741	4	1	1972	227.2	5.5	17720	839.64	31	16	0	6853030	13264561	9449706	6345621	10180090	9798280	4836378	6019800	5004620
High	High	IsMasterProtein	O75534	Cold shock domain-containing protein E1 OS=Homo sapiens GN=CSDE1 PE=1 SV=2	0	0	61	45	863	45	1	798	88.8	6.25	20272	839.6	45	21	0	1.44561e+09	1.53092e+09	1.43727e+09	1.44798e+09	1.52618e+09	1.50859e+09	1.89929e+09	1.95905e+09	1.85313e+09	Acetyl [N-Term]
High	High	IsMasterProtein	P17980	26S protease regulatory subunit 6A OS=Homo sapiens GN=PSMC3 PE=1 SV=3	0	0	71	27	699	27	1	439	49.2	5.24	16260	838.85	27	15	0	9.91162e+08	1.01595e+09	9.87526e+08	1.00014e+09	1.03752e+09	1.04848e+09	1.15132e+09	1.19916e+09	1.13386e+09	Acetyl [N-Term]
High	High	IsMasterProtein	Q8IWJ2	GRIP and coiled-coil domain-containing protein 2 OS=Homo sapiens GN=GCC2 PE=1 SV=4	0	0	53	81	794	78	1	1684	195.8	5.14	17364	838.41	78	43	2	2.49566e+08	2.66262e+08	2.54018e+08	2.91123e+08	3.18715e+08	3.09737e+08	3.19211e+08	3.32924e+08	3.30277e+08	Acetyl [N-Term]
High	High	IsMasterProtein	O60506	Heterogeneous nuclear ribonucleoprotein Q OS=Homo sapiens GN=SYNCRIP PE=1 SV=2	0	0	63	33	962	21	1	623	69.6	8.59	22825	837.95	33	17	0	2.13322e+09	2.15435e+09	2.40415e+09	2.23516e+09	2.30497e+09	2.30839e+09	2.46167e+09	2.7666e+09	2.5335e+09	Acetyl [N-Term]
High	High	IsMasterProtein	P00505	Aspartate aminotransferase, mitochondrial OS=Homo sapiens GN=GOT2 PE=1 SV=3	0	0	73	30	710	30	1	430	47.5	9.01	15278	836.91	30	14	0	1.97806e+09	2.11476e+09	2.0719e+09	2.08327e+09	2.22706e+09	2.1864e+09	2.75068e+09	2.95322e+09	2.81904e+09
High	High	IsMasterProtein	P26641	Elongation factor 1-gamma OS=Homo sapiens GN=EEF1G PE=1 SV=3	0	0	67	31	868	31	1	437	50.1	6.67	18935	835.7	31	13	0	4.78508e+09	4.88906e+09	4.82727e+09	5.45244e+09	5.45338e+09	5.60138e+09	6.38443e+09	6.45194e+09	6.29195e+09	Acetyl [N-Term]
High	High	IsMasterProtein	P27694	Replication protein A 70 kDa DNA-binding subunit OS=Homo sapiens GN=RPA1 PE=1 SV=2	0	0	64	40	783	40	1	616	68.1	7.21	18342	835.18	40	23	0	1.10962e+09	1.14449e+09	1.16216e+09	1.12898e+09	1.18384e+09	1.17228e+09	1.16824e+09	1.23072e+09	1.16937e+09	Acetyl [N-Term]
High	High	IsMasterProtein	Q6PKG0	La-related protein 1 OS=Homo sapiens GN=LARP1 PE=1 SV=2	0	0	64	64	851	58	1	1096	123.4	8.82	18696	831.81	64	26	8	9.34849e+08	9.60492e+08	9.19893e+08	9.69527e+08	9.52453e+08	9.98635e+08	1.09309e+09	1.13128e+09	1.12764e+09	Acetyl [N-Term]
High	High	IsMasterProtein	O75179	Ankyrin repeat domain-containing protein 17 OS=Homo sapiens GN=ANKRD17 PE=1 SV=3	0	0	35	70	703	54	1	2603	274.1	6.52	17000	830.81	67	39	17	3.16077e+08	3.21261e+08	3.10516e+08	3.27997e+08	3.29438e+08	3.5295e+08	4.03125e+08	4.25114e+08	4.04625e+08
High	High	IsMasterProtein	P00338	L-lactate dehydrogenase A chain OS=Homo sapiens GN=LDHA PE=1 SV=2	0	0	68	22	993	20	1	332	36.7	8.27	24413	830.48	22	10	2	9.88769e+09	1.03052e+10	9.69004e+09	1.23023e+10	1.22716e+10	1.24113e+10	9.03912e+09	9.20882e+09	8.95212e+09
High	High	IsMasterProtein	P13489	Ribonuclease inhibitor OS=Homo sapiens GN=RNH1 PE=1 SV=2	0	0	67	21	560	21	1	461	49.9	4.82	15076	828.13	20	14	0	4.71985e+08	5.08626e+08	4.77183e+08	6.07662e+08	6.17213e+08	6.43539e+08	7.03002e+08	7.46156e+08	7.37647e+08	Acetyl [N-Term]
High	High	IsMasterProtein	P09429	High mobility group protein B1 OS=Homo sapiens GN=HMGB1 PE=1 SV=3	0	0	51	19	714	14	1	215	24.9	5.74	18255	825.33	18	15	8	2.46401e+09	2.55519e+09	2.45541e+09	2.5134e+09	2.64024e+09	2.86864e+09	2.6806e+09	2.73888e+09	2.56862e+09
High	High	IsMasterProtein	O15523	ATP-dependent RNA helicase DDX3Y OS=Homo sapiens GN=DDX3Y PE=1 SV=2	0	0	57	39	982	10	1	660	73.1	7.55	23618	825.32	39	20	0	1.22835e+08	1.36685e+08	1.25831e+08	1.30963e+08	1.47046e+08	1.51388e+08	2.20491e+08	2.24832e+08	2.04623e+08
High	High	IsMasterProtein	O00232	26S proteasome non-ATPase regulatory subunit 12 OS=Homo sapiens GN=PSMD12 PE=1 SV=3	0	0	56	23	662	23	1	456	52.9	7.65	15346	822.9	23	13	0	8.9195e+08	9.4786e+08	9.44398e+08	1.01595e+09	1.01209e+09	1.0746e+09	1.25801e+09	1.25962e+09	1.26608e+09
n/a	High	IsMasterProtein	Q99996	A-kinase anchor protein 9 OS=Homo sapiens GN=AKAP9 PE=1 SV=3		0	23	62	221	83	1	3911	453.4	4.98		822.12		62	0	1.48803e+08	1.53976e+08	1.5533e+08	1.63544e+08	1.75178e+08	1.64676e+08	1.34705e+08	1.41412e+08	1.35712e+08
High	High	IsMasterProtein	Q9H0U4	Ras-related protein Rab-1B OS=Homo sapiens GN=RAB1B PE=1 SV=1	0	0	77	18	657	10	1	201	22.2	5.73	15427	816.25	18	10	7	1.45257e+09	1.6967e+09	1.56863e+09	1.60323e+09	1.55928e+09	1.58315e+09	1.93831e+09	1.9438e+09	1.9485e+09	Acetyl [N-Term]
High	High	IsMasterProtein	Q12931	Heat shock protein 75 kDa, mitochondrial OS=Homo sapiens GN=TRAP1 PE=1 SV=3	0	0	55	37	783	36	1	704	80.1	8.21	17739	814.47	37	22	0	1.02926e+09	1.1205e+09	1.10678e+09	1.02592e+09	1.03593e+09	1.03793e+09	1.44955e+09	1.42861e+09	1.43907e+09
High	High	IsMasterProtein	Q15436	Protein transport protein Sec23A OS=Homo sapiens GN=SEC23A PE=1 SV=2	0	0	57	32	642	28	1	765	86.1	7.08	13949	814.4	32	17	0	3.86472e+08	4.1147e+08	4.36685e+08	4.23384e+08	4.57302e+08	4.56832e+08	5.7159e+08	5.73012e+08	5.79009e+08	Acetyl [N-Term]
High	High	IsMasterProtein	Q8TEX9	Importin-4 OS=Homo sapiens GN=IPO4 PE=1 SV=2	0	0	52	42	683	42	1	1081	118.6	4.96	15548	813.92	42	23	0	4.98311e+08	5.12824e+08	4.92568e+08	5.10044e+08	5.42549e+08	5.32428e+08	6.12814e+08	6.29942e+08	6.09244e+08	Acetyl [N-Term]
High	High	IsMasterProtein	P55060	Exportin-2 OS=Homo sapiens GN=CSE1L PE=1 SV=3	0	0	51	49	984	49	1	971	110.3	5.77	24319	813.05	49	23	0	2.77791e+09	2.90616e+09	2.92178e+09	2.39736e+09	2.51732e+09	2.48322e+09	2.44992e+09	2.41515e+09	2.30698e+09	Acetyl [N-Term]
High	High	IsMasterProtein	O43242	26S proteasome non-ATPase regulatory subunit 3 OS=Homo sapiens GN=PSMD3 PE=1 SV=2	0	0	66	42	908	42	1	534	60.9	8.44	22570	812.96	42	23	0	1.48763e+09	1.81015e+09	1.50262e+09	1.66113e+09	1692187704	1.56671e+09	1.9847e+09	1.91064e+09	2.03092e+09
High	High	IsMasterProtein	P49915	GMP synthase [glutamine-hydrolyzing] OS=Homo sapiens GN=GMPS PE=1 SV=1	0	0	72	47	763	47	1	693	76.7	6.87	16222	812	47	28	0	1.32757e+09	1.28334e+09	1.28203e+09	1.21309e+09	1.18228e+09	1.27027e+09	1.29974e+09	1.34153e+09	1.35968e+09	Acetyl [N-Term]
High	High	IsMasterProtein	Q14444	Caprin-1 OS=Homo sapiens GN=CAPRIN1 PE=1 SV=2	0	0	59	28	694	28	1	709	78.3	5.25	16316	811.17	28	15	0	1.1233e+09	1103757899	1.08524e+09	1.17108e+09	1.15439e+09	1.30481e+09	1.32803e+09	1.29791e+09	1.32303e+09
High	High	IsMasterProtein	P10586	Receptor-type tyrosine-protein phosphatase F OS=Homo sapiens GN=PTPRF PE=1 SV=2	0	0	51	68	669	58	1	1907	212.7	6.3	14264	810.98	65	41	9	3.06439e+08	3.0697e+08	3.00682e+08	3.05569e+08	321638420	3.30312e+08	3.36114e+08	3.64352e+08	3.44016e+08
High	High	IsMasterProtein	P48637	Glutathione synthetase OS=Homo sapiens GN=GSS PE=1 SV=1	0	0	66	28	647	28	1	474	52.4	5.92	14837	810.59	28	14	0	1.21071e+09	1.28891e+09	1.25287e+09	1.33021e+09	1.30045e+09	1.39117e+09	1.69969e+09	1.7072e+09	1.57873e+09	Acetyl [N-Term]
High	High	IsMasterProtein	P55327	Tumor protein D52 OS=Homo sapiens GN=TPD52 PE=1 SV=2	0	0	56	10	500	10	1	224	24.3	4.83	13248	807.14	10	8	0	1000326857	1.00497e+09	9.67026e+08	1.17693e+09	1.16256e+09	1.27969e+09	1.45362e+09	1.57506e+09	1.39956e+09
High	High	IsMasterProtein	Q07021	Complement component 1 Q subcomponent-binding protein, mitochondrial OS=Homo sapiens GN=C1QBP PE=1 SV=1	0	0	34	8	544	8	1	282	31.3	4.84	13281	806.22	7	7	0	1.40307e+09	1.27922e+09	1.11447e+09	1.3558e+09	1.32158e+09	1.2984e+09	1.86691e+09	1.76786e+09	1.77553e+09
High	High	IsMasterProtein	P63104	14-3-3 protein zeta/delta OS=Homo sapiens GN=YWHAZ PE=1 SV=1	0	0	72	20	1109	16	1	245	27.7	4.79	25222	804.77	20	12	2	5.39061e+09	5.61537e+09	5.46582e+09	5.58428e+09	5.57631e+09	5.7887e+09	6.56392e+09	6.76799e+09	6.4442e+09	Acetyl [N-Term]
High	High	IsMasterProtein	Q9P258	Protein RCC2 OS=Homo sapiens GN=RCC2 PE=1 SV=2	0	0	70	29	546	29	1	522	56	8.78	12467	804.76	28	15	0	4.94807e+08	5.21822e+08	5.50861e+08	5.56896e+08	6.01865e+08	5.75768e+08	6.14451e+08	6.32801e+08	5.32355e+08
High	High	IsMasterProtein	Q9H3U1	Protein unc-45 homolog A OS=Homo sapiens GN=UNC45A PE=1 SV=1	0	0	58	51	830	51	1	944	103	6.07	21278	804.5	51	26	0	8.54507e+08	8.58735e+08	8.57162e+08	8.88703e+08	8.9728e+08	9.02758e+08	1.13055e+09	1.23165e+09	1.13995e+09
High	High	IsMasterProtein	Q9BUF5	Tubulin beta-6 chain OS=Homo sapiens GN=TUBB6 PE=1 SV=1	0	0	37	13	1012	1	1	446	49.8	4.88	19315	802.14	13	11	0	2.11923e+07	2.21571e+07	2.26415e+07	2.34642e+07	2.95245e+07	2.1928e+07	3.2293e+07	2.84827e+07	3.08136e+07
High	High	IsMasterProtein	P63241	Eukaryotic translation initiation factor 5A-1 OS=Homo sapiens GN=EIF5A PE=1 SV=2	0	0	81	13	693	8	1	154	16.8	5.24	17629	801.27	13	8	8	1.76032e+09	2.0562e+09	1.8927e+09	1.81844e+09	2.09271e+09	1.85471e+09	2.17716e+09	2.13491e+09	2.07939e+09	Acetyl [N-Term]
High	High	IsMasterProtein	P00491	Purine nucleoside phosphorylase OS=Homo sapiens GN=PNP PE=1 SV=2	0	0	81	18	615	18	1	289	32.1	6.95	14465	800.1	18	11	0	1.06237e+09	1.12936e+09	1.10508e+09	1.03577e+09	1.0507e+09	1.04092e+09	1.07264e+09	1.11607e+09	1.03154e+09	Acetyl [N-Term]
High	High	IsMasterProtein	P22307	Non-specific lipid-transfer protein OS=Homo sapiens GN=SCP2 PE=1 SV=2	0	0	60	27	655	27	1	547	59	6.89	14100	795.42	27	15	0	8.1187e+08	8.17291e+08	7.69097e+08	8.43928e+08	8.87615e+08	8.62126e+08	1.04825e+09	1.07558e+09	1.06826e+09
High	High	IsMasterProtein	Q6P996	Pyridoxal-dependent decarboxylase domain-containing protein 1 OS=Homo sapiens GN=PDXDC1 PE=1 SV=2	0	0	72	44	612	44	1	788	86.7	5.38	12450	794.61	43	26	0	5.55947e+08	5.75702e+08	5.34367e+08	5.97912e+08	6.11197e+08	5.91166e+08	7.4552e+08	7.36881e+08	7.16651e+08
High	High	IsMasterProtein	Q92499	ATP-dependent RNA helicase DDX1 OS=Homo sapiens GN=DDX1 PE=1 SV=2	0	0	64	46	791	46	1	740	82.4	7.23	18149	794.22	46	25	0	1.32437e+09	1.35368e+09	1.37924e+09	1.30859e+09	1.34035e+09	1.34482e+09	1.54233e+09	1.58125e+09	1.51537e+09
High	High	IsMasterProtein	Q7KZ85	Transcription elongation factor SPT6 OS=Homo sapiens GN=SUPT6H PE=1 SV=2	0	0	50	71	658	71	1	1726	198.9	4.91	15536	794.04	70	38	0	2.23993e+08	2.35846e+08	2.36731e+08	2.29677e+08	2.33288e+08	2.50817e+08	2.45846e+08	2.65013e+08	2.52604e+08
High	High	IsMasterProtein	P30041	Peroxiredoxin-6 OS=Homo sapiens GN=PRDX6 PE=1 SV=3	0	0	78	21	854	21	1	224	25	6.38	20658	793.94	20	12	0	5.36826e+09	5.45733e+09	5.38203e+09	5.74198e+09	6.12998e+09	5.95058e+09	5.50855e+09	5.75684e+09	5.19786e+09
High	High	IsMasterProtein	Q02218	2-oxoglutarate dehydrogenase, mitochondrial OS=Homo sapiens GN=OGDH PE=1 SV=3	0	0	60	53	798	53	1	1023	115.9	6.86	18668	791.44	53	27	0	5.73593e+08	5.80948e+08	5.85176e+08	5.39643e+08	5.23927e+08	5.49507e+08	7.34043e+08	7.82296e+08	7.2706e+08
High	High	IsMasterProtein	O60716	Catenin delta-1 OS=Homo sapiens GN=CTNND1 PE=1 SV=1	0	0	61	53	778	53	1	968	108.1	6.23	19236	790.77	53	26	0	7.70174e+08	7.7627e+08	7.72371e+08	9.0004e+08	9.23659e+08	9.98568e+08	8.78946e+08	9.30774e+08	8.34592e+08
High	High	IsMasterProtein	P52948	Nuclear pore complex protein Nup98-Nup96 OS=Homo sapiens GN=NUP98 PE=1 SV=4	0	0	44	69	736	69	1	1817	197.5	6.4	17823	789.76	69	35	0	4.31961e+08	4.70069e+08	4.53397e+08	4.43124e+08	4.72579e+08	4.76703e+08	5.37578e+08	5.39648e+08	5.24599e+08
High	High	IsMasterProtein	P35237	Serpin B6 OS=Homo sapiens GN=SERPINB6 PE=1 SV=3	0	0	64	20	785	19	1	376	42.6	5.27	20906	787.95	20	13	1	1.19329e+09	1.27064e+09	1.23012e+09	1.32871e+09	1.43923e+09	1.37162e+09	1638534530	1.69031e+09	1.5742e+09
High	High	IsMasterProtein	Q15437	Protein transport protein Sec23B OS=Homo sapiens GN=SEC23B PE=1 SV=2	0	0	65	36	666	32	1	767	86.4	6.89	14832	787.82	36	19	5	5.81238e+08	5.73699e+08	5.97639e+08	6.57146e+08	6.74609e+08	6.72994e+08	7.20278e+08	7.41514e+08	6.67568e+08	Acetyl [N-Term]
High	High	IsMasterProtein	Q9UPQ0	LIM and calponin homology domains-containing protein 1 OS=Homo sapiens GN=LIMCH1 PE=1 SV=4	0	0	67	66	846	66	1	1083	121.8	6.47	21236	787.07	65	31	0	5.52078e+08	5.79544e+08	5.90249e+08	8.24634e+08	8.96583e+08	9.00811e+08	1.12795e+09	1.22237e+09	1.08392e+09	Acetyl [N-Term]
High	High	IsMasterProtein	P54105	Methylosome subunit pICln OS=Homo sapiens GN=CLNS1A PE=1 SV=1	0	0	56	7	414	7	1	237	26.2	4.11	10329	785.75	7	6	0	1.4492e+08	1.38956e+08	1.37279e+08	1.3259e+08	1.2707e+08	1.32535e+08	1.64622e+08	1.78987e+08	1.55691e+08
High	High	IsMasterProtein	Q13439	Golgin subfamily A member 4 OS=Homo sapiens GN=GOLGA4 PE=1 SV=1	0	0	49	104	781	102	1	2230	261	5.39	16903	785.65	102	50	1	2.81669e+08	2.80371e+08	2.77771e+08	3.14537e+08	3.06931e+08	3.18298e+08	3.93846e+08	3.8883e+08	3.78646e+08
High	High	IsMasterProtein	Q29RF7	Sister chromatid cohesion protein PDS5 homolog A OS=Homo sapiens GN=PDS5A PE=1 SV=1	0	0	50	65	680	59	1	1337	150.7	7.91	17587	785.41	62	32	8	3.11664e+08	3.30962e+08	3.34137e+08	2.93338e+08	3.0841e+08	3.01701e+08	2.87985e+08	2.88396e+08	2.68233e+08
High	High	IsMasterProtein	P50570	Dynamin-2 OS=Homo sapiens GN=DNM2 PE=1 SV=2	0	0	53	46	665	30	1	870	98	7.44	13890	785.3	46	22	19	6.01545e+08	6.14026e+08	6.36967e+08	6.44304e+08	6.41116e+08	6.30165e+08	7.57386e+08	7.6536e+08	7.50992e+08
High	High	IsMasterProtein	Q13185	Chromobox protein homolog 3 OS=Homo sapiens GN=CBX3 PE=1 SV=4	0	0	63	10	537	8	1	183	20.8	5.33	13040	778.91	10	7	0	1.04714e+09	1.16717e+09	1.09336e+09	1.1416e+09	1.17196e+09	1.12604e+09	1.13964e+09	1.14261e+09	1.07684e+09
High	High	IsMasterProtein	P51148	Ras-related protein Rab-5C OS=Homo sapiens GN=RAB5C PE=1 SV=2	0	0	79	13	525	10	1	216	23.5	8.41	12761	777.61	13	8	4	6.68145e+08	7.18965e+08	6.47241e+08	5.04004e+08	5.37475e+08	5.34014e+08	7.39847e+08	7.45899e+08	7.64607e+08
High	High	IsMasterProtein	Q9Y2X3	Nucleolar protein 58 OS=Homo sapiens GN=NOP58 PE=1 SV=1	0	0	60	29	735	29	1	529	59.5	8.92	18260	775.52	29	15	0	7.11308e+08	6.60622e+08	7.06953e+08	7.3604e+08	7.25521e+08	7.45542e+08	8.99354e+08	9.16624e+08	8.86781e+08
High	High	IsMasterProtein	Q5JPE7	Nodal modulator 2 OS=Homo sapiens GN=NOMO2 PE=1 SV=1	0	0	48	45	645	2	1	1267	139.4	5.76	14002	773.59	45	28	49	396465436	4.44978e+08	4.10271e+08	4.08934e+08	4.32037e+08	4.27827e+08	5.70303e+08	5.79851e+08	5.40065e+08
High	High	IsMasterProtein	Q9UBB4	Ataxin-10 OS=Homo sapiens GN=ATXN10 PE=1 SV=1	0	0	64	26	627	26	1	475	53.5	5.25	14596	772.67	26	17	0	7.38989e+08	7.70776e+08	7.37703e+08	8.6245e+08	8.74244e+08	8.71543e+08	1.17453e+09	1.21961e+09	1.15561e+09
High	High	IsMasterProtein	Q16891	MICOS complex subunit MIC60 OS=Homo sapiens GN=IMMT PE=1 SV=1	0	0	65	52	675	52	1	758	83.6	6.48	14171	772.66	50	29	0	5.95714e+08	6.03102e+08	6.10165e+08	5.23871e+08	5.58969e+08	5.71206e+08	6.92512e+08	7.15387e+08	6.88678e+08
High	High	IsMasterProtein	A6NHR9	Structural maintenance of chromosomes flexible hinge domain-containing protein 1 OS=Homo sapiens GN=SMCHD1 PE=1 SV=2	0	0	51	99	1014	99	1	2005	226.2	7.3	24974	770.58	97	46	0	8.53617e+08	8.7223e+08	8.63297e+08	8.26004e+08	8.66439e+08	8.7565e+08	9.86283e+08	9.80693e+08	9.3856e+08	Acetyl [N-Term]
High	High	IsMasterProtein	O00299	Chloride intracellular channel protein 1 OS=Homo sapiens GN=CLIC1 PE=1 SV=4	0	0	80	15	512	15	1	241	26.9	5.17	10892	770.35	15	10	0	1.23472e+09	1.28522e+09	1.26726e+09	1.43331e+09	1.51742e+09	1.46702e+09	1.6224e+09	1.58447e+09	1.53553e+09	Acetyl [N-Term]
High	High	IsMasterProtein	Q01518	Adenylyl cyclase-associated protein 1 OS=Homo sapiens GN=CAP1 PE=1 SV=5	0	0	59	28	745	27	1	475	51.9	8.06	17330	767.58	28	14	1	1.38922e+09	1.435e+09	1.35081e+09	1.4164e+09	1.50037e+09	1.49505e+09	1.69658e+09	1.71024e+09	1.60255e+09	Acetyl [N-Term]
High	High	IsMasterProtein	Q12888	Tumor suppressor p53-binding protein 1 OS=Homo sapiens GN=TP53BP1 PE=1 SV=2	0	0	49	68	683	68	1	1972	213.4	4.7	17208	766	66	50	0	2.06922e+08	2.18056e+08	2.06133e+08	2.01196e+08	2.12625e+08	2.19076e+08	2.35082e+08	2.32627e+08	2.24692e+08
High	High	IsMasterProtein	P58876	Histone H2B type 1-D OS=Homo sapiens GN=HIST1H2BD PE=1 SV=2	0	0	75	12	1080	3	1	126	13.9	10.32	31301	764.61	11	5	11	1.59368e+10	1.54967e+10	1.59553e+10	1.93712e+10	1.80725e+10	1.9821e+10	1.85732e+10	1.76617e+10	1.673e+10
High	High	IsMasterProteinRejected	Q99877	Histone H2B type 1-N OS=Homo sapiens GN=HIST1H2BN PE=1 SV=3	0	0	75	12	1080	0	0	126	13.9	10.32	31301	764.4	11	5	0
High	High	IsMasterProtein	P22830	Ferrochelatase, mitochondrial OS=Homo sapiens GN=FECH PE=1 SV=2	0	0	60	22	516	22	1	423	47.8	8.73	11936	764.15	22	13	0	6.85298e+08	6.8693e+08	6.74318e+08	6.25236e+08	6.31359e+08	6.81694e+08	8.11619e+08	8.30421e+08	8.26661e+08
High	High	None	P69849	Nodal modulator 3 OS=Homo sapiens GN=NOMO3 PE=3 SV=2	0	0	48	44	640	1	1	1222	134	5.67	13942	762.58	44	27	0	3.95191e+08	4.43366e+08	4.07981e+08	4.06474e+08	4.27655e+08	4.25015e+08	5.67028e+08	5.76236e+08	5.36576e+08
High	High	IsMasterProtein	O00429	Dynamin-1-like protein OS=Homo sapiens GN=DNM1L PE=1 SV=2	0	0	77	45	734	45	1	736	81.8	6.81	18440	761.77	43	24	0	6.56495e+08	6.68088e+08	6.62733e+08	6.64849e+08	6.80412e+08	7.04096e+08	8.43751e+08	8.67028e+08	8.2189e+08	Acetyl [N-Term]
High	High	None	Q99879	Histone H2B type 1-M OS=Homo sapiens GN=HIST1H2BM PE=1 SV=3	0	0	65	11	1079	2	1	126	14	10.32	31301	761.24	11	4	0	1.59368e+10	1.54967e+10	1.59553e+10	1.93712e+10	1.80725e+10	1.9821e+10	1.85732e+10	1.76617e+10	1.673e+10
High	High	None	Q5QNW6	Histone H2B type 2-F OS=Homo sapiens GN=HIST2H2BF PE=1 SV=3	0	0	65	11	1079	2	1	126	13.9	10.32	31301	761.24	11	4	0	1.59368e+10	1.54967e+10	1.59553e+10	1.93712e+10	1.80725e+10	1.9821e+10	1.85732e+10	1.76617e+10	1.673e+10
High	High	None	Q93079	Histone H2B type 1-H OS=Homo sapiens GN=HIST1H2BH PE=1 SV=3	0	0	65	11	1079	2	1	126	13.9	10.32	31301	761.24	11	4	0	1.59368e+10	1.54967e+10	1.59553e+10	1.93712e+10	1.80725e+10	1.9821e+10	1.85732e+10	1.76617e+10	1.673e+10
High	High	None	P62807	Histone H2B type 1-C/E/F/G/I OS=Homo sapiens GN=HIST1H2BC PE=1 SV=4	0	0	65	11	1079	2	1	126	13.9	10.32	31301	761.24	11	4	0	1.59368e+10	1.54967e+10	1.59553e+10	1.93712e+10	1.80725e+10	1.9821e+10	1.85732e+10	1.76617e+10	1.673e+10
High	High	None	Q99880	Histone H2B type 1-L OS=Homo sapiens GN=HIST1H2BL PE=1 SV=3	0	0	65	11	1079	2	1	126	13.9	10.32	31301	761.24	11	4	0	1.59368e+10	1.54967e+10	1.59553e+10	1.93712e+10	1.80725e+10	1.9821e+10	1.85732e+10	1.76617e+10	1.673e+10
High	High	None	O60814	Histone H2B type 1-K OS=Homo sapiens GN=HIST1H2BK PE=1 SV=3	0	0	58	10	1071	2	1	126	13.9	10.32	31070	761.24	10	4	0	1.59363e+10	1.54964e+10	1.5955e+10	1.93707e+10	1.80722e+10	1.98206e+10	1.85728e+10	1.76615e+10	1.67297e+10
High	High	None	P57053	Histone H2B type F-S OS=Homo sapiens GN=H2BFS PE=1 SV=2	0	0	53	9	1062	2	1	126	13.9	10.37	30963	761.24	9	4	0	1.59356e+10	1.54945e+10	1.59537e+10	1.93567e+10	1.80521e+10	1.97975e+10	1.85659e+10	1.76483e+10	1.67202e+10
High	High	IsMasterProtein	P07741	Adenine phosphoribosyltransferase OS=Homo sapiens GN=APRT PE=1 SV=2	0	0	66	8	415	8	1	180	19.6	6.02	9771	757.16	8	4	0	8.76349e+08	9.76469e+08	9.76494e+08	9.86791e+08	1.01342e+09	9.74541e+08	1.26219e+09	1.24117e+09	1.15409e+09	Acetyl [N-Term]
High	High	IsMasterProtein	P28070	Proteasome subunit beta type-4 OS=Homo sapiens GN=PSMB4 PE=1 SV=4	0	0	64	11	426	11	1	264	29.2	5.97	9635	756.8	10	8	0	4.83021e+08	5.80955e+08	4.94176e+08	5.31112e+08	5.38252e+08	5.7925e+08	7.19987e+08	7.25644e+08	6.17087e+08	Acetyl [N-Term]
High	High	IsMasterProtein	Q9Y3F4	Serine-threonine kinase receptor-associated protein OS=Homo sapiens GN=STRAP PE=1 SV=1	0	0	77	23	667	23	1	350	38.4	5.12	15984	755.35	23	15	0	9.60889e+08	1.00947e+09	9.96145e+08	1.02131e+09	1.05947e+09	1.02761e+09	1.30437e+09	1.31848e+09	1.29187e+09
High	High	IsMasterProtein	O75694	Nuclear pore complex protein Nup155 OS=Homo sapiens GN=NUP155 PE=1 SV=1	0	0	41	40	660	40	1	1391	155.1	6.16	15190	755.27	40	26	0	5.34882e+08	5.5093e+08	5.40817e+08	5.57255e+08	5.87971e+08	5.8075e+08	5.42738e+08	5.7033e+08	5.43466e+08
High	High	IsMasterProtein	P49790	Nuclear pore complex protein Nup153 OS=Homo sapiens GN=NUP153 PE=1 SV=2	0	0	59	66	736	66	1	1475	153.8	8.73	17536	752.14	62	36	0	3.59751e+08	3.93264e+08	3.52736e+08	3.79478e+08	3.96059e+08	3.86187e+08	4.29004e+08	4.32896e+08	4.18296e+08	Acetyl [N-Term; N-Term]
High	High	IsMasterProtein	Q15643	Thyroid receptor-interacting protein 11 OS=Homo sapiens GN=TRIP11 PE=1 SV=3	0	0	55	95	820	95	1	1979	227.4	5.26	19159	751.05	94	44	0	2.792e+08	2.93322e+08	2.88918e+08	3.0929e+08	3.13366e+08	3.26513e+08	3.3639e+08	3.35439e+08	3.23817e+08
High	High	IsMasterProtein	P33778	Histone H2B type 1-B OS=Homo sapiens GN=HIST1H2BB PE=1 SV=2	0	0	74	11	1044	1	1	126	13.9	10.32	30533	750.39	10	4	1	5.06808e+08	5.43335e+08	5.37637e+08	5.60703e+08	6.58054e+08	6.6018e+08	5.24565e+08	6.04323e+08	5.78412e+08
High	High	IsMasterProtein	P27348	14-3-3 protein theta OS=Homo sapiens GN=YWHAQ PE=1 SV=1	0	0	69	18	950	12	1	245	27.7	4.78	22601	749.6	18	10	1	2.105e+09	2.14914e+09	2.30761e+09	2.31578e+09	2.48336e+09	2240004658	2.65136e+09	2.81087e+09	2.547e+09
High	High	IsMasterProtein	P61163	Alpha-centractin OS=Homo sapiens GN=ACTR1A PE=1 SV=1	0	0	70	22	544	11	1	376	42.6	6.64	11258	747.35	22	11	15	5.12894e+08	5.78036e+08	5.74501e+08	5.97564e+08	6.35681e+08	6.18246e+08	7.20281e+08	7.43011e+08	7.01219e+08	Acetyl [N-Term]
High	High	None	Q16778	Histone H2B type 2-E OS=Homo sapiens GN=HIST2H2BE PE=1 SV=3	0	0	64	10	1043	0	1	126	13.9	10.32	30533	747.24	10	3	0	5.04699e+08	541493581	5.35968e+08	5.59113e+08	6.56821e+08	6.58711e+08	5.24565e+08	6.04323e+08	5.77314e+08
High	High	None	P23527	Histone H2B type 1-O OS=Homo sapiens GN=HIST1H2BO PE=1 SV=3	0	0	64	10	1043	0	1	126	13.9	10.32	30533	747.24	10	3	0	5.04699e+08	541493581	5.35968e+08	5.59113e+08	6.56821e+08	6.58711e+08	5.24565e+08	6.04323e+08	5.77314e+08
High	High	None	P06899	Histone H2B type 1-J OS=Homo sapiens GN=HIST1H2BJ PE=1 SV=3	0	0	57	9	1035	0	1	126	13.9	10.32	30302	747.24	9	3	0	5.04699e+08	541493581	5.35968e+08	5.59113e+08	6.56821e+08	6.58711e+08	5.24565e+08	6.04323e+08	5.77314e+08
High	High	IsMasterProtein	P22059	Oxysterol-binding protein 1 OS=Homo sapiens GN=OSBP PE=1 SV=1	0	0	61	43	723	39	1	807	89.4	7.3	16494	743.61	42	23	8	8.04365e+08	7.6484e+08	8.28327e+08	8.90766e+08	9.20482e+08	9.20642e+08	1.07579e+09	1.07237e+09	1.08704e+09
High	High	IsMasterProtein	P46063	ATP-dependent DNA helicase Q1 OS=Homo sapiens GN=RECQL PE=1 SV=3	0	0	59	32	625	31	1	649	73.4	7.88	14043	741.15	32	18	1	4.63302e+08	5.02016e+08	508278700	4.89912e+08	5.04559e+08	5.22247e+08	4.87668e+08	5.13866e+08	4.88453e+08
High	High	IsMasterProtein	O94979	Protein transport protein Sec31A OS=Homo sapiens GN=SEC31A PE=1 SV=3	0	0	46	48	653	46	1	1220	132.9	6.89	14753	740.2	47	28	1	8.30761e+08	8.72671e+08	8.80168e+08	914087886	9.65715e+08	9.57312e+08	1.14074e+09	1.14056e+09	1.09356e+09
High	High	IsMasterProtein	Q9ULT8	E3 ubiquitin-protein ligase HECTD1 OS=Homo sapiens GN=HECTD1 PE=1 SV=3	0	0	42	86	747	86	1	2610	289.2	5.35	19071	740.15	82	42	0	3.10754e+08	3.31787e+08	3.34511e+08	3.27192e+08	3.4856e+08	3.57525e+08	4.26635e+08	4.55963e+08	4.17409e+08
High	High	IsMasterProtein	Q8N257	Histone H2B type 3-B OS=Homo sapiens GN=HIST3H2BB PE=1 SV=3	0	0	64	9	1004	1	1	126	13.9	10.32	29927	738.94	9	2	0	1.58078e+06	2789821	2.63672e+06	1.81823e+06	2429635	1.94737e+06		269300	147148
High	High	IsMasterProtein	P32322	Pyrroline-5-carboxylate reductase 1, mitochondrial OS=Homo sapiens GN=PYCR1 PE=1 SV=2	0	0	69	19	585	18	1	319	33.3	7.61	16323	737.94	19	16	1	4.78196e+08	5.21002e+08	5.15074e+08	5.21309e+08	5.20062e+08	543073561	5.96502e+08	6.50691e+08	5.72364e+08	Acetyl [N-Term]
High	High	IsMasterProtein	P83916	Chromobox protein homolog 1 OS=Homo sapiens GN=CBX1 PE=1 SV=1	0	0	72	15	471	14	1	185	21.4	4.93	11524	736.82	15	9	3	3.9604e+08	4.22627e+08	3.82558e+08	4.05267e+08	4.06179e+08	3.94296e+08	5.15213e+08	5.06364e+08	5.17544e+08
High	High	IsMasterProtein	P09110	3-ketoacyl-CoA thiolase, peroxisomal OS=Homo sapiens GN=ACAA1 PE=1 SV=2	0	0	72	20	431	20	1	424	44.3	8.44	11805	736.74	19	18	0	4.40917e+08	4.64122e+08	4.50151e+08	5.47825e+08	5.60181e+08	5.47729e+08	6.97684e+08	6.96755e+08	6.55246e+08
High	High	IsMasterProtein	P40763	Signal transducer and activator of transcription 3 OS=Homo sapiens GN=STAT3 PE=1 SV=2	0	0	60	35	631	35	1	770	88	6.3	16430	736.42	35	23	0	4.38848e+08	4.48082e+08	4.52891e+08	5.17518e+08	5.4504e+08	5.52903e+08	9.44609e+08	9.34072e+08	9.29066e+08	Acetyl [N-Term]
High	High	IsMasterProtein	O15372	Eukaryotic translation initiation factor 3 subunit H OS=Homo sapiens GN=EIF3H PE=1 SV=1	0	0	64	20	567	20	1	352	39.9	6.54	13800	735.77	19	11	0	6.66281e+08	6.92079e+08	7.29452e+08	6.88991e+08	6.84066e+08	7.03728e+08	8.12572e+08	8.46342e+08	7.61364e+08
High	High	IsMasterProtein	Q15155	Nodal modulator 1 OS=Homo sapiens GN=NOMO1 PE=1 SV=5	0	0	48	44	633	1	1	1222	134.2	5.81	13883	734.69	44	27	0	5.31465e+06	5.72983e+06	6.30099e+06	7.08518e+06	7696722	9.20163e+06	1.17517e+07	1.21703e+07	9503145
High	High	IsMasterProtein	P34949	Mannose-6-phosphate isomerase OS=Homo sapiens GN=MPI PE=1 SV=2	0	0	60	19	532	19	1	423	46.6	5.95	12072	733.38	19	13	0	6.05292e+08	6.20573e+08	6.21465e+08	6.53982e+08	6.54663e+08	6.93916e+08	7.06803e+08	7.10101e+08	7.29524e+08
High	High	IsMasterProtein	P54920	Alpha-soluble NSF attachment protein OS=Homo sapiens GN=NAPA PE=1 SV=3	0	0	83	22	570	19	1	295	33.2	5.36	13272	732.52	22	15	3	6.36452e+08	6.71809e+08	6.38571e+08	7.85699e+08	8.21578e+08	7.91304e+08	9.96544e+08	1.02455e+09	1.02636e+09
High	High	IsMasterProtein	Q9UMX0	Ubiquilin-1 OS=Homo sapiens GN=UBQLN1 PE=1 SV=2	0	0	48	18	622	9	1	589	62.5	5.11	13595	732.2	18	13	0	1.42468e+08	1.47372e+08	159552157	1.51844e+08	1.49895e+08	1.50088e+08	1.64434e+08	1.65989e+08	1.49493e+08	Acetyl [N-Term]
High	High	IsMasterProtein	Q13045	Protein flightless-1 homolog OS=Homo sapiens GN=FLII PE=1 SV=2	0	0	47	50	633	50	1	1269	144.7	6.05	14565	732.05	49	28	0	5.66719e+08	5.94486e+08	5.91825e+08	6.31636e+08	6.44682e+08	6.56527e+08	4.52089e+08	4.73092e+08	4.76376e+08	Acetyl [N-Term]
High	High	IsMasterProtein	Q92538	Golgi-specific brefeldin A-resistance guanine nucleotide exchange factor 1 OS=Homo sapiens GN=GBF1 PE=1 SV=2	0	0	50	70	760	70	1	1859	206.3	5.73	16858	730.05	70	36	0	4.09515e+08	4.26809e+08	4.05263e+08	4.34282e+08	4.42695e+08	4.54925e+08	5.5826e+08	5.60594e+08	5.56984e+08
High	High	IsMasterProtein	Q8IY81	pre-rRNA processing protein FTSJ3 OS=Homo sapiens GN=FTSJ3 PE=1 SV=2	0	0	57	38	618	38	1	847	96.5	8.4	15247	729.03	38	23	0	3.49294e+08	3.79729e+08	3.75707e+08	3.80461e+08	3.97101e+08	3.89644e+08	4.35944e+08	4.72428e+08	4.32176e+08
High	High	IsMasterProtein	Q9UHD9	Ubiquilin-2 OS=Homo sapiens GN=UBQLN2 PE=1 SV=2	0	0	40	18	563	12	1	624	65.7	5.22	12938	727.34	18	13	6	4.85742e+08	4.93317e+08	5.01458e+08	5.30377e+08	5.3026e+08	5.35231e+08	6.10067e+08	6.0363e+08	5.92883e+08	Acetyl [N-Term]
High	High	IsMasterProtein	P46060	Ran GTPase-activating protein 1 OS=Homo sapiens GN=RANGAP1 PE=1 SV=1	0	0	67	36	751	36	1	587	63.5	4.68	20832	726.9	36	22	0	1.06242e+09	1.05884e+09	1.09807e+09	1.03063e+09	1.0552e+09	1.09231e+09	1.10012e+09	1.10625e+09	1.08385e+09
High	High	IsMasterProtein	P43490	Nicotinamide phosphoribosyltransferase OS=Homo sapiens GN=NAMPT PE=1 SV=1	0	0	70	28	526	28	1	491	55.5	7.15	11689	726.21	28	15	0	7.46571e+08	7.66368e+08	7.6839e+08	7.95838e+08	8.41109e+08	8.74559e+08	8.14703e+08	8.01222e+08	7.33682e+08	Acetyl [N-Term]
High	High	IsMasterProtein	O95394	Phosphoacetylglucosamine mutase OS=Homo sapiens GN=PGM3 PE=1 SV=1	0	0	68	27	576	27	1	542	59.8	6.25	13126	723.89	26	17	0	5.47711e+08	5.83323e+08	5.98009e+08	5.76007e+08	6.13353e+08	6.52428e+08	7.17463e+08	7.08802e+08	6.99233e+08
High	High	IsMasterProtein	Q08J23	tRNA (cytosine(34)-C(5))-methyltransferase OS=Homo sapiens GN=NSUN2 PE=1 SV=2	0	0	78	51	696	51	1	767	86.4	6.77	16163	722.64	51	27	0	6.67188e+08	6.64814e+08	6.80124e+08	7.11985e+08	7.3462e+08	7.46557e+08	8.98209e+08	9.2895e+08	8.92473e+08
High	High	IsMasterProtein	Q6XQN6	Nicotinate phosphoribosyltransferase OS=Homo sapiens GN=NAPRT PE=1 SV=2	0	0	73	29	516	29	1	538	57.5	5.68	11247	721.92	28	19	0	5.1103e+08	5.31875e+08	5.17863e+08	6.20859e+08	6.42167e+08	6.53004e+08	7.12061e+08	7.24278e+08	7.09144e+08	Acetyl [N-Term]
High	High	IsMasterProtein	P47897	Glutamine--tRNA ligase OS=Homo sapiens GN=QARS PE=1 SV=1	0	0	65	48	695	47	1	775	87.7	7.15	16440	721.16	47	21	0	1.26893e+09	1.36335e+09	1.34977e+09	1.40073e+09	1.43128e+09	1.44139e+09	1.62724e+09	1.7179e+09	1.57285e+09	Acetyl [N-Term]
High	High	IsMasterProtein	P63151	Serine/threonine-protein phosphatase 2A 55 kDa regulatory subunit B alpha isoform OS=Homo sapiens GN=PPP2R2A PE=1 SV=1	0	0	68	27	501	17	1	447	51.7	6.2	10675	720.86	27	17	10	9.28876e+08	9.92344e+08	9.49239e+08	9.05755e+08	9.51886e+08	1.00347e+09	1.0432e+09	1099061314	1.08767e+09	Acetyl [N-Term]
High	High	IsMasterProtein	P30043	Flavin reductase (NADPH) OS=Homo sapiens GN=BLVRB PE=1 SV=3	0	0	67	11	534	11	1	206	22.1	7.65	13503	720.57	11	8	0	1.08483e+09	1.1416e+09	1.05245e+09	1.14547e+09	1.11596e+09	1.15935e+09	1.32423e+09	1.33644e+09	1.27797e+09
High	High	IsMasterProtein	Q9UHB9	Signal recognition particle subunit SRP68 OS=Homo sapiens GN=SRP68 PE=1 SV=2	0	0	70	41	680	41	1	627	70.7	8.56	19493	719.64	41	21	0	6.65185e+08	6.9167e+08	7.34958e+08	7.35982e+08	7.59543e+08	7.55947e+08	8.65614e+08	9.2211e+08	8.60078e+08
High	High	IsMasterProtein	P34931	Heat shock 70 kDa protein 1-like OS=Homo sapiens GN=HSPA1L PE=1 SV=2	0	0	27	14	686	1	1	641	70.3	6.02	17381	718.35	13	8	0
n/a	High	IsMasterProtein	O15027	Protein transport protein Sec16A OS=Homo sapiens GN=SEC16A PE=1 SV=3		0	35	38	174	34	1	2179	233.4	5.63		717.74		38	0
High	High	IsMasterProtein	Q14240	Eukaryotic initiation factor 4A-II OS=Homo sapiens GN=EIF4A2 PE=1 SV=2	0	0	70	29	761	12	1	407	46.4	5.48	18366	717.65	28	14	0	1.5265e+08	1.64332e+08	1.63159e+08	1.77018e+08	1.64949e+08	1.96264e+08	1.99149e+08	2.07154e+08	1.98959e+08	Acetyl [N-Term]
High	High	IsMasterProtein	P78344	Eukaryotic translation initiation factor 4 gamma 2 OS=Homo sapiens GN=EIF4G2 PE=1 SV=1	0	0	61	52	790	52	1	907	102.3	7.14	18258	716.97	51	24	0	1.02669e+09	1.02409e+09	1.03068e+09	1.0522e+09	1.03317e+09	1.10734e+09	1.27996e+09	1.28521e+09	1.22991e+09	Acetyl [N-Term]
High	High	IsMasterProtein	P13797	Plastin-3 OS=Homo sapiens GN=PLS3 PE=1 SV=4	0	0	55	34	596	24	1	630	70.8	5.6	14522	716.17	33	20	2	3.55299e+08	3.43421e+08	3.4846e+08	3.72828e+08	3.55533e+08	3.85011e+08	4.61875e+08	4.96719e+08	496675503	Acetyl [N-Term]
High	High	IsMasterProtein	P24928	DNA-directed RNA polymerase II subunit RPB1 OS=Homo sapiens GN=POLR2A PE=1 SV=2	0	0	46	78	742	78	1	1970	217	7.37	16011	715	74	41	0	3.26616e+08	3.38331e+08	3.47607e+08	3.27528e+08	3.53979e+08	3.56419e+08	3.73174e+08	3.72497e+08	3.43367e+08	Acetyl [N-Term]
High	High	IsMasterProtein	P02751	Fibronectin OS=Homo sapiens GN=FN1 PE=1 SV=4	0	0	37	64	620	64	1	2386	262.5	5.71	12885	713.86	64	36	0	2.33929e+08	2.45941e+08	2.32263e+08	2.59968e+08	2.75995e+08	2.93678e+08	1.77553e+08	1.85987e+08	168098776
High	High	IsMasterProtein	P67775	Serine/threonine-protein phosphatase 2A catalytic subunit alpha isoform OS=Homo sapiens GN=PPP2CA PE=1 SV=1	0	0	64	16	517	1	1	309	35.6	5.54	11709	713.22	16	11	0	8.17001e+07	8.19526e+07	9.59629e+07	9.09621e+07	9.92292e+07	1.00789e+08	1.30684e+08	1.25472e+08	1.29596e+08
High	High	IsMasterProtein	P62979	Ubiquitin-40S ribosomal protein S27a OS=Homo sapiens GN=RPS27A PE=1 SV=2	0	0	53	8	982	3	1	156	18	9.64	23351	711.74	8	6	5	9.00089e+09	1.09153e+10	9.00179e+09	10394800507	9.91207e+09	9.86018e+09	1.09406e+10	9.52558e+09	9.39805e+09
High	High	IsMasterProtein	Q53SF7	Cordon-bleu protein-like 1 OS=Homo sapiens GN=COBLL1 PE=1 SV=2	0	0	62	59	604	59	1	1204	131.7	6.67	13452	711.46	57	37	0	1.41736e+08	1.4906e+08	1.54192e+08	1.68424e+08	1.68024e+08	1.76112e+08	1.91155e+08	1.94197e+08	1.84039e+08
High	High	IsMasterProtein	O94906	Pre-mRNA-processing factor 6 OS=Homo sapiens GN=PRPF6 PE=1 SV=1	0	0	58	54	704	54	1	941	106.9	8.25	17389	710.35	53	23	0	5.18715e+08	5.28658e+08	5.39691e+08	5.39262e+08	5.56511e+08	5.63895e+08	6.4817e+08	6.34771e+08	6.32379e+08
High	High	IsMasterProtein	P32969	60S ribosomal protein L9 OS=Homo sapiens GN=RPL9 PE=1 SV=1	0	0	62	11	428	11	1	192	21.9	9.95	8209	708.87	11	9	0	1.00819e+09	1.15418e+09	1.04587e+09	1.03509e+09	1.01012e+09	1.14122e+09	1.2944e+09	1.32827e+09	1.30474e+09
High	High	IsMasterProtein	Q14257	Reticulocalbin-2 OS=Homo sapiens GN=RCN2 PE=1 SV=1	0	0	65	18	532	18	1	317	36.9	4.4	11362	707.51	18	11	0	7.21754e+08	7.06105e+08	7.49945e+08	7.82227e+08	7.90083e+08	8.11255e+08	1.03669e+09	1.13103e+09	1.02715e+09
High	High	IsMasterProtein	O94826	Mitochondrial import receptor subunit TOM70 OS=Homo sapiens GN=TOMM70 PE=1 SV=1	0	0	73	37	662	37	1	608	67.4	7.12	14630	701.6	37	19	0	5.30661e+08	5.68696e+08	5.77667e+08	5.87772e+08	6.07208e+08	5.97008e+08	8.46995e+08	8.48634e+08	8.12557e+08	Acetyl [N-Term]
High	High	IsMasterProtein	Q02750	Dual specificity mitogen-activated protein kinase kinase 1 OS=Homo sapiens GN=MAP2K1 PE=1 SV=2	0	0	61	21	449	13	1	393	43.4	6.62	9961	701.53	21	10	0	1.69795e+08	1.82517e+08	1.8013e+08	2.10017e+08	2.30095e+08	2.11902e+08	2.83179e+08	2.66917e+08	2.91709e+08
High	High	IsMasterProtein	P14314	Glucosidase 2 subunit beta OS=Homo sapiens GN=PRKCSH PE=1 SV=2	0	0	58	30	694	30	1	528	59.4	4.41	14853	701.08	30	18	0	1.98277e+09	2046631784	2.16582e+09	2.00468e+09	2.16714e+09	2.10937e+09	2.30213e+09	2.53704e+09	2.1759e+09
High	High	IsMasterProtein	Q93009	Ubiquitin carboxyl-terminal hydrolase 7 OS=Homo sapiens GN=USP7 PE=1 SV=2	0	0	61	58	774	58	1	1102	128.2	5.55	16494	700.67	58	26	0	8.0104e+08	8.56672e+08	8.57754e+08	8.15512e+08	8.78496e+08	8.79103e+08	9.52532e+08	9.84408e+08	9.51629e+08	Acetyl [N-Term]
High	High	IsMasterProtein	P11216	Glycogen phosphorylase, brain form OS=Homo sapiens GN=PYGB PE=1 SV=5	0	0	60	50	689	41	1	843	96.6	6.86	15167	700.12	50	28	11	1.03122e+09	1.07499e+09	1.07001e+09	1.07331e+09	1.09494e+09	1.09751e+09	1.36353e+09	1.44522e+09	1.37209e+09
High	High	IsMasterProtein	Q86XP3	ATP-dependent RNA helicase DDX42 OS=Homo sapiens GN=DDX42 PE=1 SV=1	0	0	59	41	593	41	1	938	102.9	7.02	14075	700.07	40	23	0	4.10562e+08	4.26265e+08	4.36276e+08	3.92357e+08	4.2067e+08	4.3847e+08	5.08442e+08	4.92949e+08	4.85109e+08
High	High	IsMasterProtein	P62917	60S ribosomal protein L8 OS=Homo sapiens GN=RPL8 PE=1 SV=2	0	0	56	20	522	20	1	257	28	11.03	10587	699.76	19	14	0	1.89893e+09	2.01952e+09	1.96094e+09	1.98547e+09	2.13357e+09	2.24712e+09	2.52204e+09	2.50151e+09	2.27014e+09
High	High	IsMasterProtein	Q9H4A4	Aminopeptidase B OS=Homo sapiens GN=RNPEP PE=1 SV=2	0	0	68	36	615	36	1	650	72.5	5.74	13725	699.4	34	21	0	1.3075e+09	1.23436e+09	1.2408e+09	1.30747e+09	1.35703e+09	1.31147e+09	1.32303e+09	1.40349e+09	1.35289e+09	Acetyl [N-Term]
High	High	IsMasterProtein	P62714	Serine/threonine-protein phosphatase 2A catalytic subunit beta isoform OS=Homo sapiens GN=PPP2CB PE=1 SV=1	0	0	66	17	516	2	1	309	35.6	5.43	11728	696.99	17	11	20	9.83553e+08	1.04026e+09	9.86392e+08	1.10805e+09	1.10848e+09	1.12254e+09	1.23068e+09	1.23915e+09	1.19187e+09
High	High	IsMasterProtein	P78347	General transcription factor II-I OS=Homo sapiens GN=GTF2I PE=1 SV=2	0	0	64	58	709	57	1	998	112.3	6.39	16770	696.91	55	29	1	7.41674e+08	7.69078e+08	7.66918e+08	7.21909e+08	7.64923e+08	7.81261e+08	8.00106e+08	8.17537e+08	7.7008e+08	Acetyl [N-Term]
High	High	IsMasterProtein	Q9UHX1	Poly(U)-binding-splicing factor PUF60 OS=Homo sapiens GN=PUF60 PE=1 SV=1	0	0	67	28	672	28	1	559	59.8	5.29	16897	696.82	26	13	0	9.33405e+08	9.49757e+08	9.29648e+08	8.46664e+08	8.60395e+08	8.69069e+08	9.58094e+08	1.01012e+09	9.33039e+08	Acetyl [N-Term]
High	High	IsMasterProtein	Q15459	Splicing factor 3A subunit 1 OS=Homo sapiens GN=SF3A1 PE=1 SV=1	0	0	59	42	658	42	1	793	88.8	5.22	14005	695.9	42	25	0	8.62447e+08	8.77612e+08	8.351e+08	8.50094e+08	8.70915e+08	8.83931e+08	8.22817e+08	8.51935e+08	7.65262e+08
High	High	IsMasterProtein	Q15067	Peroxisomal acyl-coenzyme A oxidase 1 OS=Homo sapiens GN=ACOX1 PE=1 SV=3	0	0	53	29	503	29	1	660	74.4	8.16	10014	694.73	29	17	0	4.45703e+08	4.74189e+08	4.53194e+08	4.00819e+08	3.93714e+08	4.1555e+08	6.37888e+08	6.4254e+08	6.33211e+08
High	High	IsMasterProtein	Q15424	Scaffold attachment factor B1 OS=Homo sapiens GN=SAFB PE=1 SV=4	0	0	51	50	829	35	1	915	102.6	5.47	19990	694.42	50	19	15	9.0695e+08	9.37016e+08	9.2679e+08	9.00785e+08	9.73102e+08	9.53809e+08	1.12263e+09	1.15295e+09	1.10817e+09	Acetyl [N-Term]
High	High	IsMasterProtein	Q5TH69	Brefeldin A-inhibited guanine nucleotide-exchange protein 3 OS=Homo sapiens GN=ARFGEF3 PE=1 SV=3	0	0	43	75	695	74	1	2177	240.5	5.82	18365	694.24	74	39	1	2.80901e+08	2.86049e+08	290239076	2.89925e+08	2.96827e+08	3.13567e+08	3.46817e+08	3.60267e+08	349092141	Acetyl [N-Term]
High	High	IsMasterProtein	P12532	Creatine kinase U-type, mitochondrial OS=Homo sapiens GN=CKMT1A PE=1 SV=1	0	0	50	20	573	20	1	417	47	8.34	12211	693.44	20	10	0	1.70455e+09	1.72924e+09	1.68072e+09	1.85114e+09	1.95186e+09	1.99901e+09	2.44229e+09	2.50987e+09	2.43099e+09
High	High	IsMasterProtein	Q9BQS8	FYVE and coiled-coil domain-containing protein 1 OS=Homo sapiens GN=FYCO1 PE=1 SV=3	0	0	54	66	567	66	1	1478	166.9	4.92	13248	692.69	65	31	0	1.52836e+08	1.60957e+08	1.62505e+08	1.92447e+08	2.021e+08	2.03623e+08	2.52854e+08	2.61119e+08	2.52006e+08	Acetyl [N-Term]
High	High	IsMasterProtein	O14497	AT-rich interactive domain-containing protein 1A OS=Homo sapiens GN=ARID1A PE=1 SV=3	0	0	39	56	558	53	1	2285	241.9	6.7	12033	692.08	56	28	3	1.6474e+08	1.63637e+08	1.78325e+08	1.69432e+08	1.67823e+08	1.72528e+08	1.62148e+08	1.59382e+08	1.62511e+08	Acetyl [N-Term]
High	High	IsMasterProtein	Q99459	Cell division cycle 5-like protein OS=Homo sapiens GN=CDC5L PE=1 SV=2	0	0	73	49	610	49	1	802	92.2	8.18	13684	686.48	49	23	0	4.37548e+08	4.60223e+08	4.58439e+08	4.7144e+08	4.77807e+08	5.01135e+08	5.07627e+08	5.33608e+08	5.10338e+08
High	High	IsMasterProtein	P04632	Calpain small subunit 1 OS=Homo sapiens GN=CAPNS1 PE=1 SV=1	0	0	75	12	401	12	1	268	28.3	5.2	11773	684.44	12	9	0	2.35212e+08	2.59735e+08	2.32521e+08	2.70711e+08	2.60078e+08	2.71159e+08	3.20847e+08	3.36186e+08	2.91245e+08	Acetyl [N-Term]
High	High	IsMasterProtein	Q9Y617	Phosphoserine aminotransferase OS=Homo sapiens GN=PSAT1 PE=1 SV=2	0	0	75	22	739	22	1	370	40.4	7.66	18335	683.65	21	16	0	1.95262e+09	1.98439e+09	1.9132e+09	2.50031e+09	2.61445e+09	2.60403e+09	3.10836e+09	3.17262e+09	3.03581e+09
High	High	IsMasterProtein	Q9BVP2	Guanine nucleotide-binding protein-like 3 OS=Homo sapiens GN=GNL3 PE=1 SV=2	0	0	51	32	575	30	1	549	62	9.16	13936	681.81	32	18	2	5.32427e+08	5.24433e+08	5.12774e+08	5.17602e+08	5.05539e+08	5.47603e+08	6.19961e+08	6.48988e+08	6.34821e+08
High	High	IsMasterProtein	Q96QK1	Vacuolar protein sorting-associated protein 35 OS=Homo sapiens GN=VPS35 PE=1 SV=2	0	0	55	42	731	42	1	796	91.6	5.49	17609	681.36	40	26	0	1.74516e+09	2.02456e+09	1.9667e+09	1.60267e+09	1.89565e+09	2.03671e+09	2.52089e+09	2.54359e+09	2.29095e+09
High	High	IsMasterProtein	P20810	Calpastatin OS=Homo sapiens GN=CAST PE=1 SV=4	0	0	58	34	537	34	1	708	76.5	5.07	13007	676.56	34	20	0	2.65512e+08	2.68351e+08	2.88637e+08	2.84752e+08	3.16896e+08	2.91916e+08	3.48973e+08	3.47046e+08	3.31583e+08
High	High	IsMasterProtein	Q9NR09	Baculoviral IAP repeat-containing protein 6 OS=Homo sapiens GN=BIRC6 PE=1 SV=2	0	0	33	110	746	110	1	4857	529.9	6.05	17708	675.68	107	47	0	2.14327e+08	2.32342e+08	2.27421e+08	2.45529e+08	2.41041e+08	2.51684e+08	2.6438e+08	2.87203e+08	2.65299e+08
High	High	IsMasterProtein	P18583	Protein SON OS=Homo sapiens GN=SON PE=1 SV=4	0	0	34	63	773	63	1	2426	263.7	5.64	15935	674.4	62	31	0	5.90794e+08	5.96241e+08	6.05668e+08	5.98012e+08	6.26934e+08	6.29659e+08	6.50972e+08	6.64612e+08	6.60595e+08	Acetyl [N-Term]
High	High	IsMasterProtein	Q96TA1	Niban-like protein 1 OS=Homo sapiens GN=FAM129B PE=1 SV=3	0	0	63	37	504	37	1	746	84.1	6.19	10677	673.6	36	19	0	3.77197e+08	3.96512e+08	3.70765e+08	3.77248e+08	3.82382e+08	3.81139e+08	3.56855e+08	3.52098e+08	3.37672e+08	Acetyl [N-Term]
High	High	IsMasterProtein	Q13310	Polyadenylate-binding protein 4 OS=Homo sapiens GN=PABPC4 PE=1 SV=1	0	0	58	31	797	19	1	644	70.7	9.26	18837	673.24	31	13	0	5.52925e+08	5.68412e+08	5.87406e+08	5.93386e+08	6.36108e+08	6.27312e+08	7.66091e+08	8.30374e+08	7.5898e+08
High	High	IsMasterProtein	Q9Y5B9	FACT complex subunit SPT16 OS=Homo sapiens GN=SUPT16H PE=1 SV=1	0	0	39	40	625	40	1	1047	119.8	5.66	13909	672.26	40	21	0	6.88682e+08	7.30653e+08	7.33257e+08	6.3758e+08	6.68156e+08	7.02113e+08	6.64252e+08	6.91863e+08	6.36215e+08
High	High	IsMasterProtein	Q9BZH6	WD repeat-containing protein 11 OS=Homo sapiens GN=WDR11 PE=1 SV=1	0	0	51	46	550	46	1	1224	136.6	6.92	11979	671.69	46	28	0	1.96272e+08	2.06235e+08	2.09114e+08	2.04767e+08	2.13737e+08	2.1325e+08	2.43352e+08	2.59569e+08	2.52012e+08
High	High	IsMasterProtein	Q16531	DNA damage-binding protein 1 OS=Homo sapiens GN=DDB1 PE=1 SV=1	0	0	48	50	804	50	1	1140	126.9	5.26	17989	671.49	49	24	0	8.09253e+08	8.1696e+08	8.07233e+08	8.90836e+08	8.88194e+08	9.07012e+08	1.14265e+09	1.24316e+09	1.16833e+09	Acetyl [N-Term]
High	High	IsMasterProtein	O43290	U4/U6.U5 tri-snRNP-associated protein 1 OS=Homo sapiens GN=SART1 PE=1 SV=1	0	0	55	39	533	39	1	800	90.2	6.13	13813	670.39	39	22	0	3.21752e+08	3.1874e+08	3.15803e+08	3.03506e+08	3.14908e+08	3.20878e+08	3.37188e+08	3.57455e+08	3.3329e+08
High	High	IsMasterProtein	Q5JSZ5	Protein PRRC2B OS=Homo sapiens GN=PRRC2B PE=1 SV=2	0	0	43	65	643	62	1	2229	242.8	8.34	16158	669.41	64	33	0	1.57628e+08	1.70531e+08	1.71248e+08	1.56601e+08	1.60971e+08	1.61018e+08	1.90794e+08	1.90211e+08	1.8138e+08
High	High	IsMasterProtein	P29966	Myristoylated alanine-rich C-kinase substrate OS=Homo sapiens GN=MARCKS PE=1 SV=4	0	0	59	14	414	13	1	332	31.5	4.45	13029	669.02	14	12	1	2.30159e+08	2.69207e+08	2.64174e+08	2.58543e+08	2.33568e+08	2.78168e+08	3.94493e+08	4.15531e+08	4.34522e+08
High	High	IsMasterProtein	P02786	Transferrin receptor protein 1 OS=Homo sapiens GN=TFRC PE=1 SV=2	0	0	51	34	689	34	1	760	84.8	6.61	17176	666.3	34	18	0	1.28881e+09	1.27553e+09	1.28558e+09	1.07771e+09	1.08177e+09	1.12146e+09	1.49924e+09	1.49353e+09	1.45362e+09
High	High	IsMasterProtein	Q96AE4	Far upstream element-binding protein 1 OS=Homo sapiens GN=FUBP1 PE=1 SV=3	0	0	63	36	936	30	1	644	67.5	7.61	22525	665.74	35	22	4	1.60029e+09	1.65453e+09	1.69884e+09	1.66573e+09	1.59747e+09	1.70045e+09	2.3344e+09	2.25974e+09	2.25559e+09	Acetyl [N-Term]
High	High	IsMasterProtein	O14974	Protein phosphatase 1 regulatory subunit 12A OS=Homo sapiens GN=PPP1R12A PE=1 SV=1	0	0	54	51	644	50	1	1030	115.2	5.4	15731	665.22	51	22	1	3.68693e+08	3.94618e+08	3.8697e+08	3.96207e+08	4.15263e+08	4.2098e+08	5.91398e+08	6.16695e+08	5.99585e+08
High	High	IsMasterProtein	Q9H0D6	5'-3' exoribonuclease 2 OS=Homo sapiens GN=XRN2 PE=1 SV=1	0	0	64	52	574	52	1	950	108.5	7.47	11465	664.86	51	33	0	4.45117e+08	4.5611e+08	4.61407e+08	4.62164e+08	4.80364e+08	5.27776e+08	5.08116e+08	5.26684e+08	5.15368e+08
High	High	IsMasterProtein	O60610	Protein diaphanous homolog 1 OS=Homo sapiens GN=DIAPH1 PE=1 SV=2	0	0	46	58	712	56	1	1272	141.3	5.41	14383	664.48	55	30	2	6.38758e+08	6.60107e+08	6.40555e+08	5.99026e+08	6.28155e+08	6.4531e+08	5.95132e+08	6.30653e+08	6.13198e+08	Acetyl [N-Term]
High	High	IsMasterProtein	O43143	Pre-mRNA-splicing factor ATP-dependent RNA helicase DHX15 OS=Homo sapiens GN=DHX15 PE=1 SV=2	0	0	58	48	898	47	1	795	90.9	7.46	21014	664.39	47	24	3	1.17878e+09	1.30582e+09	1.21558e+09	1.1749e+09	1.1899e+09	1.25135e+09	1.38721e+09	1.43237e+09	1.38643e+09
High	High	IsMasterProtein	A5YKK6	CCR4-NOT transcription complex subunit 1 OS=Homo sapiens GN=CNOT1 PE=1 SV=2	0	0	43	84	703	84	1	2376	266.8	7.11	15594	664.07	83	37	0	4.4891e+08	4.60775e+08	4.62083e+08	4.19689e+08	4.47694e+08	4.52162e+08	5.62481e+08	5.6495e+08	5.42415e+08
High	High	IsMasterProtein	O95831	Apoptosis-inducing factor 1, mitochondrial OS=Homo sapiens GN=AIFM1 PE=1 SV=1	0	0	45	23	536	23	1	613	66.9	8.95	11872	663.99	23	16	0	7.16034e+08	7.32333e+08	7.23917e+08	6.55506e+08	6.97487e+08	6.6851e+08	8.56532e+08	8.87267e+08	8.46392e+08
High	High	IsMasterProtein	Q12802	A-kinase anchor protein 13 OS=Homo sapiens GN=AKAP13 PE=1 SV=2	0	0	38	67	477	67	1	2813	307.4	5.24	11368	663.67	64	35	0	1.29366e+08	1.18426e+08	1.12212e+08	1.15618e+08	1.13666e+08	1.28379e+08	1.64192e+08	1.64476e+08	1.62481e+08
High	High	IsMasterProtein	P08865	40S ribosomal protein SA OS=Homo sapiens GN=RPSA PE=1 SV=4	0	0	66	22	661	22	1	295	32.8	4.87	16956	662.21	22	9	0	4.40968e+09	4.43272e+09	4.58489e+09	4.37677e+09	4.45164e+09	4.65103e+09	4.94505e+09	4.80101e+09	4.70214e+09	Acetyl [N-Term]
High	High	IsMasterProtein	P55010	Eukaryotic translation initiation factor 5 OS=Homo sapiens GN=EIF5 PE=1 SV=2	0	0	54	29	598	29	1	431	49.2	5.58	13788	661.07	29	14	0	6.09336e+08	6.59248e+08	6.39302e+08	6.37882e+08	6.69758e+08	6.39468e+08	7.36829e+08	7.49735e+08	7.24712e+08
High	High	IsMasterProtein	Q9UBC2	Epidermal growth factor receptor substrate 15-like 1 OS=Homo sapiens GN=EPS15L1 PE=1 SV=1	0	0	70	43	550	43	1	864	94.2	5.11	14142	659.41	43	24	0	4.10713e+08	4.08046e+08	4.15451e+08	3.93964e+08	4.44386e+08	4.32308e+08	5.13358e+08	5.4828e+08	5.21285e+08
High	High	IsMasterProtein	Q9BTC0	Death-inducer obliterator 1 OS=Homo sapiens GN=DIDO1 PE=1 SV=5	0	0	48	74	588	73	1	2240	243.7	7.88	12138	657.87	74	31	1	2.98893e+08	3.38913e+08	3.25722e+08	3.39771e+08	3.62587e+08	3.54438e+08	4.08066e+08	4.10521e+08	3.73624e+08	Acetyl [N-Term]
High	High	IsMasterProtein	P09960	Leukotriene A-4 hydrolase OS=Homo sapiens GN=LTA4H PE=1 SV=2	0	0	61	32	539	32	1	611	69.2	6.18	13695	657.2	32	17	0	4.288e+08	4.27604e+08	4.41086e+08	4.48501e+08	4.55026e+08	4.57327e+08	4.37735e+08	4.92921e+08	4.61373e+08
High	High	IsMasterProtein	P30154	Serine/threonine-protein phosphatase 2A 65 kDa regulatory subunit A beta isoform OS=Homo sapiens GN=PPP2R1B PE=1 SV=3	0	0	48	25	547	17	1	601	66.2	4.94	13722	656.35	24	18	0	1.21693e+08	1.32337e+08	1.25171e+08	1.15032e+08	1.13106e+08	1.13182e+08	1.13829e+08	1.13782e+08	1.15331e+08
High	High	IsMasterProtein	O95757	Heat shock 70 kDa protein 4L OS=Homo sapiens GN=HSPA4L PE=1 SV=3	0	0	62	42	582	38	1	839	94.5	5.88	13303	655.21	41	23	0	2.09935e+08	2.29269e+08	2.16287e+08	2.00194e+08	2.20197e+08	2.10693e+08	2.59756e+08	2.82064e+08	2.60959e+08
High	High	IsMasterProtein	P04040	Catalase OS=Homo sapiens GN=CAT PE=1 SV=3	0	0	70	32	597	32	1	527	59.7	7.39	14767	655.2	32	17	0	1.01667e+09	1.08203e+09	1.02238e+09	9.57836e+08	1.00549e+09	1.00957e+09	1.02098e+09	1.08985e+09	938282651	Acetyl [N-Term]
High	High	IsMasterProtein	P49589	Cysteine--tRNA ligase, cytoplasmic OS=Homo sapiens GN=CARS PE=1 SV=3	0	0	61	43	716	43	1	748	85.4	6.76	18422	655.06	42	24	0	5.07794e+08	5.0989e+08	5.05768e+08	6.40841e+08	6.50054e+08	6.56621e+08	7.91619e+08	8.23276e+08	7.89286e+08
High	High	IsMasterProtein	P49189	4-trimethylaminobutyraldehyde dehydrogenase OS=Homo sapiens GN=ALDH9A1 PE=1 SV=3	0	0	55	26	619	26	1	494	53.8	5.87	15145	655.06	26	15	0	1.76996e+09	1.86191e+09	1.73228e+09	1.68325e+09	1.81138e+09	1.83951e+09	2.43643e+09	2.43396e+09	2.34746e+09	Acetyl [N-Term]
High	High	IsMasterProtein	Q641Q2	WASH complex subunit 2A OS=Homo sapiens GN=WASHC2A PE=1 SV=3	0	0	49	46	514	16	1	1341	147.1	4.81	12050	653.05	43	32	31	1.61305e+08	1.70206e+08	1.62515e+08	1.74048e+08	1.76405e+08	1.86614e+08	2.04582e+08	2.03805e+08	1.96916e+08
High	High	IsMasterProtein	O95347	Structural maintenance of chromosomes protein 2 OS=Homo sapiens GN=SMC2 PE=1 SV=2	0	0	54	64	740	64	1	1197	135.6	8.43	16785	651.58	63	30	0	6.76298e+08	7.45145e+08	7.12188e+08	6.44032e+08	6.83497e+08	6.5925e+08	5.92582e+08	5.83918e+08	5.53381e+08
High	High	IsMasterProtein	P04264	Keratin, type II cytoskeletal 1 OS=Homo sapiens GN=KRT1 PE=1 SV=6	0	0	51	42	652	34	1	644	66	8.12	16904	651.4	41	22	3	6.02024e+08	6.28885e+08	6.23869e+08	5.80761e+08	6.19495e+08	6.08574e+08	1.64893e+09	1.73271e+09	1.67502e+09
High	High	IsMasterProtein	O94973	AP-2 complex subunit alpha-2 OS=Homo sapiens GN=AP2A2 PE=1 SV=2	0	0	53	38	602	30	1	939	103.9	6.96	14137	651.29	38	22	0	2.95455e+08	3.10278e+08	3.02822e+08	3.11432e+08	3.08474e+08	3.18172e+08	3.49996e+08	4.00972e+08	3.61616e+08
High	High	IsMasterProtein	Q9UHD8	Septin-9 OS=Homo sapiens GN=SEPT9 PE=1 SV=2	0	0	72	45	672	44	1	586	65.4	8.97	15204	649.44	45	20	2	1.04475e+09	1.08312e+09	1.06991e+09	1.13906e+09	1.14179e+09	1.16783e+09	1.33242e+09	1.2355e+09	1.16005e+09
High	High	IsMasterProtein	O95071	E3 ubiquitin-protein ligase UBR5 OS=Homo sapiens GN=UBR5 PE=1 SV=2	0	0	36	76	623	76	1	2799	309.2	5.85	13318	649.17	74	39	0	2.19188e+08	2.2409e+08	2.179e+08	2.16961e+08	2.2205e+08	2.27493e+08	2.36528e+08	2.47247e+08	2.28215e+08	Acetyl [N-Term]
High	High	IsMasterProtein	P07737	Profilin-1 OS=Homo sapiens GN=PFN1 PE=1 SV=2	0	0	93	12	976	12	1	140	15	8.27	26514	648.21	12	9	0	7.46285e+09	8.09266e+09	7.2853e+09	7.61431e+09	8.24724e+09	7.91254e+09	8.34284e+09	8.59356e+09	7.88761e+09	Acetyl [N-Term]
High	High	IsMasterProtein	P63220	40S ribosomal protein S21 OS=Homo sapiens GN=RPS21 PE=1 SV=1	0	0	60	6	465	6	1	83	9.1	8.5	12503	648.14	6	5	0	1.47379e+09	1.53957e+09	1.4468e+09	1.56745e+09	1.57636e+09	1.55389e+09	1.81525e+09	1.84032e+09	1.78503e+09	Acetyl [N-Term]
High	High	IsMasterProtein	P50502	Hsc70-interacting protein OS=Homo sapiens GN=ST13 PE=1 SV=2	0	0	48	18	690	7	1	369	41.3	5.27	14329	647.57	18	9	15	2.05499e+09	2.04132e+09	2.09379e+09	2.00499e+09	2.08213e+09	2.19152e+09	2.73474e+09	2.96388e+09	2.79942e+09
High	High	IsMasterProtein	P33993	DNA replication licensing factor MCM7 OS=Homo sapiens GN=MCM7 PE=1 SV=4	0	0	68	44	704	44	1	719	81.3	6.46	15640	647.04	42	25	0	1.21711e+09	1.27025e+09	1.17994e+09	1.12355e+09	1.15417e+09	1.14071e+09	8.69066e+08	8.75706e+08	8.52037e+08
High	High	IsMasterProtein	Q9BT78	COP9 signalosome complex subunit 4 OS=Homo sapiens GN=COPS4 PE=1 SV=1	0	0	75	25	569	25	1	406	46.2	5.83	13953	643.38	25	18	0	5.45361e+08	6.07847e+08	6.12046e+08	6.23371e+08	6.55784e+08	6.63895e+08	7.43537e+08	7.46089e+08	7.04609e+08
High	High	IsMasterProtein	P50993	Sodium/potassium-transporting ATPase subunit alpha-2 OS=Homo sapiens GN=ATP1A2 PE=1 SV=1	0	0	19	18	519	1	1	1020	112.2	5.66	12944	643.2	17	9	0
High	High	IsMasterProtein	O00193	Small acidic protein OS=Homo sapiens GN=SMAP PE=1 SV=1	0	0	27	7	425	7	1	183	20.3	4.72	11982	642.09	7	6	0	9.80167e+07	9.61518e+07	1.01494e+08	1.08952e+08	1.08329e+08	1.05715e+08	1.14759e+08	1.22447e+08	113849249
High	High	IsMasterProtein	O14818	Proteasome subunit alpha type-7 OS=Homo sapiens GN=PSMA7 PE=1 SV=1	0	0	67	18	499	18	1	248	27.9	8.46	11874	639.58	18	9	0	1.14425e+09	1.27773e+09	1.2653e+09	1.22295e+09	1.25871e+09	1.29678e+09	1.60959e+09	1.5834e+09	1.41654e+09
High	High	IsMasterProtein	P33992	DNA replication licensing factor MCM5 OS=Homo sapiens GN=MCM5 PE=1 SV=5	0	0	61	46	741	46	1	734	82.2	8.37	16931	639.43	46	25	0	9.92051e+08	1.01518e+09	1.0405e+09	9.99335e+08	1.02078e+09	1.05341e+09	7.53759e+08	8.27898e+08	8.12105e+08	Acetyl [N-Term]
High	High	IsMasterProtein	Q96KR1	Zinc finger RNA-binding protein OS=Homo sapiens GN=ZFR PE=1 SV=2	0	0	48	42	523	41	1	1074	116.9	9.04	13874	639.41	42	24	0	2.79927e+08	2.94662e+08	2.94572e+08	3.03788e+08	3.02153e+08	3.13307e+08	3.39121e+08	3.51836e+08	3.30757e+08	Acetyl [N-Term]
High	High	IsMasterProtein	Q6P2E9	Enhancer of mRNA-decapping protein 4 OS=Homo sapiens GN=EDC4 PE=1 SV=1	0	0	55	51	641	51	1	1401	151.6	5.86	16330	639.39	49	28	0	4.12794e+08	4.22494e+08	4.18522e+08	4.24447e+08	3.98015e+08	4.5392e+08	4.2305e+08	4.45239e+08	4.50774e+08	Acetyl [N-Term]
High	High	IsMasterProtein	P60891	Ribose-phosphate pyrophosphokinase 1 OS=Homo sapiens GN=PRPS1 PE=1 SV=2	0	0	52	15	500	6	1	318	34.8	6.98	12432	638.28	15	11	0	2.30478e+08	2.53699e+08	2.12119e+08	1.99703e+08	1.84032e+08	2.13926e+08	2.29355e+08	2.42642e+08	2.17099e+08
High	High	IsMasterProtein	Q9Y6D6	Brefeldin A-inhibited guanine nucleotide-exchange protein 1 OS=Homo sapiens GN=ARFGEF1 PE=1 SV=2	0	0	47	66	602	50	1	1849	208.6	5.85	14686	638.24	65	31	17	2.23994e+08	2.38699e+08	2.21072e+08	2.49899e+08	2.56676e+08	2.49505e+08	3.04794e+08	3.0467e+08	2.93058e+08
High	High	IsMasterProtein	Q8NI35	InaD-like protein OS=Homo sapiens GN=PATJ PE=1 SV=3	0	0	48	55	499	54	1	1801	196.2	4.94	11274	636.73	52	32	1	1.47841e+08	1.57549e+08	1.54433e+08	1.51336e+08	1.69489e+08	1.59572e+08	1.1414e+08	1.33949e+08	1.20523e+08
High	High	IsMasterProtein	Q00577	Transcriptional activator protein Pur-alpha OS=Homo sapiens GN=PURA PE=1 SV=2	0	0	77	18	372	16	1	322	34.9	6.44	8490	635.37	18	9	2	6.85859e+08	7.15801e+08	6.56118e+08	7.48456e+08	7.22004e+08	7.55995e+08	8.60569e+08	8.26632e+08	8.63168e+08
High	High	IsMasterProtein	P62191	26S protease regulatory subunit 4 OS=Homo sapiens GN=PSMC1 PE=1 SV=1	0	0	81	33	564	31	1	440	49.2	6.21	13072	634.63	32	18	1	8.35689e+08	8.56281e+08	8.54105e+08	8.63219e+08	9.45526e+08	9.82481e+08	1.00873e+09	1.04727e+09	1.00568e+09
High	High	IsMasterProtein	P78540	Arginase-2, mitochondrial OS=Homo sapiens GN=ARG2 PE=1 SV=1	0	0	71	16	433	16	1	354	38.6	6.47	10255	633.37	15	9	0	4.60977e+08	4.89454e+08	5.22867e+08	3.98298e+08	4.04628e+08	4.00602e+08	5.38998e+08	5.80462e+08	5.14843e+08
High	High	IsMasterProtein	P35241	Radixin OS=Homo sapiens GN=RDX PE=1 SV=1	0	0	71	51	685	33	1	583	68.5	6.37	13746	631.2	51	19	22	1.31243e+09	1.31037e+09	1.26979e+09	1.4323e+09	1.42455e+09	1.47523e+09	1.80063e+09	1.66796e+09	1.76132e+09
High	High	IsMasterProtein	Q15139	Serine/threonine-protein kinase D1 OS=Homo sapiens GN=PRKD1 PE=1 SV=2	0	0	46	32	535	28	1	912	101.6	6.62	10623	631.18	32	19	6	4.6668e+08	5.20516e+08	4.89231e+08	4.99118e+08	5.08144e+08	5.02014e+08	5.78222e+08	5.55603e+08	5.33854e+08
High	High	IsMasterProtein	P49773	Histidine triad nucleotide-binding protein 1 OS=Homo sapiens GN=HINT1 PE=1 SV=2	0	0	79	10	463	10	1	126	13.8	6.95	12032	630.98	10	7	0	1.78281e+09	1.80553e+09	1.87967e+09	1.48071e+09	1.67369e+09	1.64493e+09	2.01296e+09	2.04293e+09	2.01435e+09
High	High	IsMasterProtein	Q14683	Structural maintenance of chromosomes protein 1A OS=Homo sapiens GN=SMC1A PE=1 SV=2	0	0	66	91	903	89	1	1233	143.1	7.64	22118	630.9	90	36	2	9.52019e+08	9.54023e+08	9.33813e+08	8.84293e+08	8.67962e+08	8.9965e+08	9.14956e+08	8.86673e+08	8.89971e+08
High	High	IsMasterProtein	P26038	Moesin OS=Homo sapiens GN=MSN PE=1 SV=3	0	0	66	48	710	32	1	577	67.8	6.4	16700	629.76	48	18	0	4.54515e+08	5.12979e+08	4.69596e+08	6.15537e+08	6.72907e+08	6.86882e+08	7.47221e+08	7.96797e+08	7.67918e+08
High	High	IsMasterProtein	P26368	Splicing factor U2AF 65 kDa subunit OS=Homo sapiens GN=U2AF2 PE=1 SV=4	0	0	51	18	414	18	1	475	53.5	9.09	8123	629.45	18	9	0	8.93534e+08	9.32469e+08	8.53122e+08	9.2471e+08	9.57254e+08	9.46123e+08	1.05717e+09	1.02315e+09	1.02282e+09	Acetyl [N-Term]
High	High	IsMasterProtein	P31689	DnaJ homolog subfamily A member 1 OS=Homo sapiens GN=DNAJA1 PE=1 SV=2	0	0	57	21	431	21	1	397	44.8	7.08	9287	628.38	21	11	0	6.18144e+08	7.1901e+08	6.76523e+08	6.81713e+08	7.05904e+08	6.82724e+08	7.91658e+08	7.52272e+08	7.13542e+08
High	High	IsMasterProtein	P15880	40S ribosomal protein S2 OS=Homo sapiens GN=RPS2 PE=1 SV=2	0	0	59	16	597	16	1	293	31.3	10.24	15169	628.34	16	7	0	1.88327e+09	1.97511e+09	1.9761e+09	1.9267e+09	2.07409e+09	2.21723e+09	2.3727e+09	2.66424e+09	2.50467e+09	Acetyl [N-Term]
High	High	IsMasterProtein	O00159	Unconventional myosin-Ic OS=Homo sapiens GN=MYO1C PE=1 SV=4	0	0	52	54	646	54	1	1063	121.6	9.41	14501	628.32	53	23	0	6.42286e+08	6.42252e+08	6.42135e+08	7.4066e+08	7.47823e+08	7.85898e+08	7.68358e+08	8.06713e+08	7.84421e+08
High	High	IsMasterProtein	O43592	Exportin-T OS=Homo sapiens GN=XPOT PE=1 SV=2	0	0	50	34	536	34	1	962	109.9	5.39	12050	627.67	33	23	0	5.71395e+08	5.89892e+08	5.74781e+08	5.82607e+08	6.12195e+08	6.17483e+08	6.50089e+08	6.35462e+08	6.29536e+08	Acetyl [N-Term]
High	High	IsMasterProtein	Q14247	Src substrate cortactin OS=Homo sapiens GN=CTTN PE=1 SV=2	0	0	59	37	651	37	1	550	61.5	5.4	17293	627.04	37	15	0	1.2315e+09	1.32225e+09	1.24939e+09	1.32458e+09	1.37323e+09	1.39018e+09	1.00273e+09	9.73354e+08	9.54421e+08
n/a	High	None	Q99873	Protein arginine N-methyltransferase 1 OS=Homo sapiens GN=PRMT1 PE=1 SV=2		0	54	17	171	18	1	361	41.5	5.43		626.77		17	0	1.68796e+09	1.70266e+09	1.70667e+09	1.79507e+09	1.82909e+09	1.79356e+09	2.10012e+09	2.11886e+09	2.05579e+09
High	High	IsMasterProtein	Q15019	Septin-2 OS=Homo sapiens GN=SEPT2 PE=1 SV=1	0	0	71	23	542	23	1	361	41.5	6.6	12402	626.03	23	14	0	7.02038e+08	6.99698e+08	6.9456e+08	6.73847e+08	6.89705e+08	7.14162e+08	7.6685e+08	8.24898e+08	790632133
High	High	IsMasterProtein	Q86UE4	Protein LYRIC OS=Homo sapiens GN=MTDH PE=1 SV=2	0	0	47	26	530	26	1	582	63.8	9.32	13473	625.71	26	17	0	4.06245e+08	4.10449e+08	4.18227e+08	4.41086e+08	4.42884e+08	4.46995e+08	5.85686e+08	5.93056e+08	5.59851e+08
High	High	IsMasterProtein	Q13177	Serine/threonine-protein kinase PAK 2 OS=Homo sapiens GN=PAK2 PE=1 SV=3	0	0	69	30	567	23	1	524	58	5.96	12663	625.59	30	15	10	6.41671e+08	6.6858e+08	6.65366e+08	6.63234e+08	7.06349e+08	7.01807e+08	8.17827e+08	8.46706e+08	7.66492e+08	Acetyl [N-Term]
High	High	IsMasterProtein	P52209	6-phosphogluconate dehydrogenase, decarboxylating OS=Homo sapiens GN=PGD PE=1 SV=3	0	0	67	30	635	30	1	483	53.1	7.23	13246	624.38	30	16	0	2.15539e+09	2.25977e+09	2.22883e+09	2.08855e+09	2.19098e+09	2.17735e+09	2.53458e+09	2.56956e+09	2.43404e+09
High	High	IsMasterProtein	O15031	Plexin-B2 OS=Homo sapiens GN=PLXNB2 PE=1 SV=3	0	0	41	57	528	57	1	1838	205	6.24	11512	623.7	57	33	0	1.89341e+08	2.01571e+08	1.91943e+08	2.06363e+08	2.08738e+08	2.05775e+08	2.37517e+08	2.41899e+08	2.39058e+08
High	High	IsMasterProtein	Q9UKG1	DCC-interacting protein 13-alpha OS=Homo sapiens GN=APPL1 PE=1 SV=1	0	0	53	27	454	27	1	709	79.6	5.41	12705	621.99	27	13	0	2.21123e+08	2.27978e+08	2.24858e+08	2.29331e+08	2.13131e+08	2.43648e+08	2.82356e+08	3.13022e+08	3.04197e+08
High	High	IsMasterProtein	P62701	40S ribosomal protein S4, X isoform OS=Homo sapiens GN=RPS4X PE=1 SV=2	0	0	62	21	582	11	1	263	29.6	10.15	14623	621.38	21	9	11	2.52108e+09	2.62732e+09	2.76587e+09	2.61319e+09	2.7537e+09	2.75112e+09	3.26801e+09	3.17507e+09	3.03852e+09
High	High	IsMasterProtein	P55036	26S proteasome non-ATPase regulatory subunit 4 OS=Homo sapiens GN=PSMD4 PE=1 SV=1	0	0	50	18	480	17	1	377	40.7	4.79	10738	621.09	18	10	0	7.77118e+08	8.49702e+08	8.24683e+08	8.80821e+08	8.59048e+08	9.01087e+08	8.84702e+08	9.08792e+08	9.33924e+08
High	High	IsMasterProtein	O15067	Phosphoribosylformylglycinamidine synthase OS=Homo sapiens GN=PFAS PE=1 SV=4	0	0	45	40	543	40	1	1338	144.6	5.76	12657	620.9	39	24	0	3.46127e+08	3.49153e+08	3.46073e+08	3.37025e+08	3.36061e+08	3.48888e+08	3.71455e+08	3.74135e+08	3.68572e+08
High	High	IsMasterProtein	P55809	Succinyl-CoA:3-ketoacid coenzyme A transferase 1, mitochondrial OS=Homo sapiens GN=OXCT1 PE=1 SV=1	0	0	53	23	515	23	1	520	56.1	7.46	12712	619.91	23	13	0	5.25175e+08	5.45839e+08	5.15547e+08	5.11629e+08	5.14298e+08	565533627	6.60168e+08	6.7653e+08	6.6801e+08
High	High	IsMasterProtein	Q5VT52	Regulation of nuclear pre-mRNA domain-containing protein 2 OS=Homo sapiens GN=RPRD2 PE=1 SV=1	0	0	59	50	525	50	1	1461	155.9	7.42	11970	619.62	48	31	0	1.98296e+08	2.05497e+08	2.07245e+08	1.84903e+08	1.88227e+08	2.13413e+08	1.9763e+08	1.90103e+08	1.81032e+08
High	High	IsMasterProtein	P62081	40S ribosomal protein S7 OS=Homo sapiens GN=RPS7 PE=1 SV=1	0	0	63	14	453	14	1	194	22.1	10.1	7900	618.5	14	4	0	1.99425e+09	2.1137e+09	2.13268e+09	1.9754e+09	2.08292e+09	2.25395e+09	2.72594e+09	2.61775e+09	2.47486e+09	Acetyl [N-Term]
High	High	IsMasterProtein	Q9C0D5	Protein TANC1 OS=Homo sapiens GN=TANC1 PE=1 SV=3	0	0	54	74	603	74	1	1861	202.1	8.32	14210	618.12	73	37	0	2.30323e+08	2.43462e+08	2.46619e+08	2.26475e+08	2.39974e+08	2.25991e+08	3.12862e+08	3.06052e+08	2.91021e+08
High	High	IsMasterProtein	P15311	Ezrin OS=Homo sapiens GN=EZR PE=1 SV=4	0	0	61	48	664	34	1	586	69.4	6.27	12904	617.94	47	19	1	6.86625e+08	7.50568e+08	7.08392e+08	8.06818e+08	8.17349e+08	8.6996e+08	9.32037e+08	1.02343e+09	1.00163e+09
High	High	IsMasterProtein	Q92905	COP9 signalosome complex subunit 5 OS=Homo sapiens GN=COPS5 PE=1 SV=4	0	0	68	19	425	19	1	334	37.6	6.54	9110	617.37	19	13	0	3.65191e+08	3.66877e+08	3.64117e+08	3.74058e+08	3.75049e+08	3.83993e+08	4.1997e+08	4.75323e+08	4.23723e+08	Acetyl [N-Term]
High	High	IsMasterProtein	Q99497	Protein DJ-1 OS=Homo sapiens GN=PARK7 PE=1 SV=2	0	0	72	15	591	15	1	189	19.9	6.79	12013	617.19	15	9	0	4.15101e+09	4.45715e+09	4.34737e+09	4.66944e+09	5.12602e+09	5.09798e+09	6.31837e+09	6.28618e+09	5.79242e+09
High	High	IsMasterProtein	P13804	Electron transfer flavoprotein subunit alpha, mitochondrial OS=Homo sapiens GN=ETFA PE=1 SV=1	0	0	55	14	520	14	1	333	35.1	8.38	13665	616.99	14	10	0	1.22255e+09	1.25553e+09	1.23286e+09	1.25485e+09	1.21111e+09	1.22548e+09	1.73521e+09	1.7418e+09	1.64946e+09
High	High	IsMasterProtein	Q9UK76	Hematological and neurological expressed 1 protein OS=Homo sapiens GN=HN1 PE=1 SV=3	0	0	80	14	416	14	1	154	16	5.6	8681	616.91	14	9	0	1.37883e+09	1.67421e+09	1.48991e+09	1.25417e+09	1.26397e+09	1.45593e+09	1.51121e+09	1.43423e+09	1.24295e+09	Acetyl [N-Term]
High	High	IsMasterProtein	P57721	Poly(rC)-binding protein 3 OS=Homo sapiens GN=PCBP3 PE=2 SV=2	0	0	25	9	474	2	1	371	39.4	8.07	10428	616.08	9	4	0	8.65777e+07	9.50003e+07	8.96075e+07	1.11304e+08	1.04747e+08	9.03052e+07	1.05841e+08	1.14307e+08	1.1695e+08
n/a	High	IsMasterProtein	O75592	E3 ubiquitin-protein ligase MYCBP2 OS=Homo sapiens GN=MYCBP2 PE=1 SV=3		0	15	43	165	58	1	4640	509.8	7.03		615.74		43	0	1.18181e+08	1.33667e+08	1.18642e+08	1.21938e+08	1.33221e+08	1.29062e+08	1.65577e+08	1.60084e+08	1.62699e+08
High	High	IsMasterProtein	P19623	Spermidine synthase OS=Homo sapiens GN=SRM PE=1 SV=1	0	0	80	17	499	17	1	302	33.8	5.49	10722	615.12	17	10	0	8.08273e+08	8.1282e+08	8.76157e+08	9.15707e+08	9.77461e+08	9.08083e+08	1.28249e+09	1.26969e+09	1.2527e+09	Acetyl [N-Term]
High	High	IsMasterProtein	P15170	Eukaryotic peptide chain release factor GTP-binding subunit ERF3A OS=Homo sapiens GN=GSPT1 PE=1 SV=1	0	0	66	27	638	12	1	499	55.7	5.62	13814	614.37	27	14	17	1.25021e+09	1.32373e+09	1.21024e+09	1.32744e+09	1.33512e+09	1.34687e+09	1.57435e+09	1.63496e+09	1.56384e+09
High	High	IsMasterProtein	Q9HB71	Calcyclin-binding protein OS=Homo sapiens GN=CACYBP PE=1 SV=2	0	0	73	24	588	24	1	228	26.2	8.25	12524	614.25	23	15	0	1.94202e+09	2.04964e+09	1.91862e+09	2.02116e+09	2.03128e+09	2.06718e+09	2.07238e+09	2.08273e+09	1.91539e+09	Acetyl [N-Term]
High	High	IsMasterProtein	P51116	Fragile X mental retardation syndrome-related protein 2 OS=Homo sapiens GN=FXR2 PE=1 SV=2	0	0	60	39	574	35	1	673	74.2	6.23	16508	612.12	38	21	5	4.27427e+08	4.86006e+08	4.5304e+08	4.45079e+08	4.55866e+08	4.81581e+08	5.22458e+08	5.00509e+08	5.02111e+08
High	High	IsMasterProtein	P51665	26S proteasome non-ATPase regulatory subunit 7 OS=Homo sapiens GN=PSMD7 PE=1 SV=2	0	0	57	15	398	15	1	324	37	6.77	8775	611.51	15	10	0	4.98446e+08	5.20797e+08	4.81221e+08	5.43837e+08	5.50968e+08	5.87277e+08	6.91458e+08	7.19098e+08	6.79803e+08
High	High	IsMasterProtein	P62495	Eukaryotic peptide chain release factor subunit 1 OS=Homo sapiens GN=ETF1 PE=1 SV=3	0	0	62	26	531	26	1	437	49	5.71	12582	611.29	26	13	0	9.78244e+08	1.01102e+09	9.77366e+08	9.81277e+08	9.56801e+08	9.94448e+08	1.12272e+09	1.1611e+09	1.11474e+09	Acetyl [N-Term]
High	High	IsMasterProtein	Q15293	Reticulocalbin-1 OS=Homo sapiens GN=RCN1 PE=1 SV=1	0	0	75	20	434	20	1	331	38.9	5	8190	611.02	20	11	0	9.4696e+08	9.18141e+08	9.10382e+08	8.92495e+08	9.48231e+08	9.29894e+08	1.13937e+09	1.17256e+09	1.14196e+09
High	High	IsMasterProtein	P09622	Dihydrolipoyl dehydrogenase, mitochondrial OS=Homo sapiens GN=DLD PE=1 SV=2	0	0	40	16	460	16	1	509	54.1	7.85	11078	609.96	16	12	0	6.99734e+08	7.4417e+08	7.26947e+08	6.61973e+08	6.65548e+08	7.19434e+08	9.85892e+08	1.14176e+09	1.02455e+09
High	High	IsMasterProtein	Q99536	Synaptic vesicle membrane protein VAT-1 homolog OS=Homo sapiens GN=VAT1 PE=1 SV=2	0	0	58	20	421	20	1	393	41.9	6.29	10594	609.26	20	15	0	2.9911e+08	3.0493e+08	3.01357e+08	3.50145e+08	3.52845e+08	3.69149e+08	4.42667e+08	4.6517e+08	4.41273e+08	Acetyl [N-Term]
High	High	IsMasterProtein	P12081	Histidine--tRNA ligase, cytoplasmic OS=Homo sapiens GN=HARS PE=1 SV=2	0	0	60	31	495	24	1	509	57.4	5.88	10236	608.22	30	13	8	1.03654e+09	1.04922e+09	1.0464e+09	1.05452e+09	1.06795e+09	1.0533e+09	1.30852e+09	1368135459	1.27299e+09
High	High	IsMasterProtein	P62241	40S ribosomal protein S8 OS=Homo sapiens GN=RPS8 PE=1 SV=2	0	0	60	15	500	15	1	208	24.2	10.32	10752	608.19	15	9	0	3.25004e+09	3.32383e+09	3.26249e+09	3.38366e+09	3.5177e+09	3.48079e+09	4.07458e+09	4.18414e+09	3.98067e+09
High	High	IsMasterProtein	Q8NE71	ATP-binding cassette sub-family F member 1 OS=Homo sapiens GN=ABCF1 PE=1 SV=2	0	0	50	38	592	38	1	845	95.9	6.8	13680	607.44	38	21	0	4.54135e+08	4.67341e+08	4.78221e+08	4.6784e+08	4.93989e+08	5.01245e+08	5.31194e+08	5.70378e+08	5.11435e+08
High	High	IsMasterProtein	Q13162	Peroxiredoxin-4 OS=Homo sapiens GN=PRDX4 PE=1 SV=1	0	0	62	17	516	14	1	271	30.5	6.29	11536	604.61	17	12	0	8.45995e+08	9.01702e+08	7.88765e+08	8.20482e+08	8.64328e+08	8.5346e+08	9.78804e+08	1.04916e+09	1.02017e+09
High	High	IsMasterProtein	Q6YN16	Hydroxysteroid dehydrogenase-like protein 2 OS=Homo sapiens GN=HSDL2 PE=1 SV=1	0	0	70	26	438	26	1	418	45.4	7.99	8920	604.53	26	18	0	2.58648e+08	2.65983e+08	2.67261e+08	2.4464e+08	2.45471e+08	2.55979e+08	3.60452e+08	3.48679e+08	3.5769e+08
High	High	IsMasterProtein	P0DN79	Cystathionine beta-synthase-like protein OS=Homo sapiens GN=CBSL PE=1 SV=1	0	0	52	26	459	26	1	551	60.5	6.65	11161	604.19	26	12	0	6.91827e+08	7.01826e+08	6.4045e+08	7.0589e+08	7.28166e+08	7.39986e+08	8.15808e+08	8.76757e+08	8.10137e+08
High	High	IsMasterProtein	Q13155	Aminoacyl tRNA synthase complex-interacting multifunctional protein 2 OS=Homo sapiens GN=AIMP2 PE=1 SV=2	0	0	61	16	437	16	1	320	35.3	8.22	10091	603.73	15	7	0	4.6795e+08	5.25194e+08	5.38487e+08	572167368	6.91381e+08	6.16622e+08	7.77343e+08	8.90707e+08	8.31934e+08
High	High	IsMasterProtein	P49755	Transmembrane emp24 domain-containing protein 10 OS=Homo sapiens GN=TMED10 PE=1 SV=2	0	0	42	12	405	11	1	219	25	7.44	9528	603.24	12	5	0	5.24794e+08	5.18473e+08	5.53499e+08	5.14191e+08	5.14434e+08	5.78012e+08	6.1993e+08	6.47006e+08	5.84149e+08
High	High	IsMasterProtein	P20042	Eukaryotic translation initiation factor 2 subunit 2 OS=Homo sapiens GN=EIF2S2 PE=1 SV=2	0	0	71	35	810	35	1	333	38.4	5.8	20861	602.87	35	17	0	1.26235e+09	1.31999e+09	1.28439e+09	1.30585e+09	1.34769e+09	1.36786e+09	1.5064e+09	1.48372e+09	1.45771e+09	Acetyl [N-Term]
High	High	IsMasterProtein	Q9H2M9	Rab3 GTPase-activating protein non-catalytic subunit OS=Homo sapiens GN=RAB3GAP2 PE=1 SV=1	0	0	40	46	527	45	1	1393	155.9	5.62	11354	602.52	46	26	1	2.49963e+08	2.69279e+08	2.52724e+08	2.51982e+08	2.7506e+08	2.76162e+08	3.28079e+08	3.3382e+08	3.18729e+08
High	High	IsMasterProtein	P31930	Cytochrome b-c1 complex subunit 1, mitochondrial OS=Homo sapiens GN=UQCRC1 PE=1 SV=3	0	0	61	23	562	22	1	480	52.6	6.37	14254	601.56	21	16	1	6.40073e+08	7.24507e+08	6.98962e+08	6.49515e+08	6.57088e+08	6.72853e+08	8.50082e+08	8.84514e+08	8.0006e+08
High	High	IsMasterProtein	O95602	DNA-directed RNA polymerase I subunit RPA1 OS=Homo sapiens GN=POLR1A PE=1 SV=2	0	0	46	59	542	58	1	1720	194.7	7.03	12083	599.62	56	29	1	2.07744e+08	2.1525e+08	2.15095e+08	1.9189e+08	197315109	1.93279e+08	2.54838e+08	2.85667e+08	2.70511e+08
High	High	IsMasterProtein	Q05086	Ubiquitin-protein ligase E3A OS=Homo sapiens GN=UBE3A PE=1 SV=4	0	0	53	42	539	42	1	875	100.6	5.22	13665	599.13	41	20	0	2.95953e+08	3.06575e+08	3.06119e+08	3.23724e+08	3.20661e+08	3.394e+08	3.97059e+08	3.97293e+08	3.77949e+08
High	High	IsMasterProtein	Q13620	Cullin-4B OS=Homo sapiens GN=CUL4B PE=1 SV=4	0	0	59	54	738	39	1	913	103.9	7.37	20060	598.93	53	24	16	1.02753e+09	1.04932e+09	1.09684e+09	1.03063e+09	1.06425e+09	1.06785e+09	1.28399e+09	1.33946e+09	1.25954e+09
High	High	IsMasterProtein	P28066	Proteasome subunit alpha type-5 OS=Homo sapiens GN=PSMA5 PE=1 SV=3	0	0	66	12	428	12	1	241	26.4	4.79	9908	597.87	12	12	0	1071814217	1.06433e+09	1.18561e+09	1.12697e+09	1.11181e+09	1.19158e+09	1.45756e+09	1.46493e+09	1.29233e+09
High	High	IsMasterProtein	O60701	UDP-glucose 6-dehydrogenase OS=Homo sapiens GN=UGDH PE=1 SV=1	0	0	77	37	566	37	1	494	55	7.12	13029	597.58	37	23	0	1.05231e+09	1.04389e+09	1.0043e+09	1.14956e+09	1.04057e+09	1.11246e+09	1.28001e+09	1.31749e+09	1.26027e+09
High	High	IsMasterProtein	Q8TC12	Retinol dehydrogenase 11 OS=Homo sapiens GN=RDH11 PE=1 SV=2	0	0	47	12	422	11	1	318	35.4	8.82	9437	596.79	12	11	1	6.68145e+08	7.12752e+08	6.82772e+08	7.36772e+08	8.06769e+08	8.41318e+08	9.35685e+08	1.0379e+09	9.89823e+08
High	High	IsMasterProtein	Q9BQ52	Zinc phosphodiesterase ELAC protein 2 OS=Homo sapiens GN=ELAC2 PE=1 SV=2	0	0	62	37	463	37	1	826	92.2	7.9	10474	596.72	37	24	0	2.07394e+08	2.07561e+08	2.08633e+08	2.15529e+08	2.05424e+08	2.12467e+08	2.71028e+08	2.87714e+08	2.68767e+08
High	High	IsMasterProtein	O75165	DnaJ homolog subfamily C member 13 OS=Homo sapiens GN=DNAJC13 PE=1 SV=5	0	0	38	74	581	74	1	2243	254.3	6.74	13565	594.58	71	27	0	2.16769e+08	2.2293e+08	2.15871e+08	2.24616e+08	2.38296e+08	2.42179e+08	2.56902e+08	2.68389e+08	2.5543e+08
High	High	IsMasterProtein	Q9H2G2	STE20-like serine/threonine-protein kinase OS=Homo sapiens GN=SLK PE=1 SV=1	0	0	47	51	599	49	1	1235	142.6	5.15	13937	593.06	49	26	2	2.58057e+08	2.64105e+08	2.69828e+08	2.49691e+08	3.03127e+08	2.48936e+08	3.22688e+08	2.83515e+08	2.62324e+08
High	High	IsMasterProtein	Q9BY44	Eukaryotic translation initiation factor 2A OS=Homo sapiens GN=EIF2A PE=1 SV=3	0	0	68	32	506	32	1	585	64.9	8.87	10979	592.87	32	16	0	4.65061e+08	4.8764e+08	4.77841e+08	5.08251e+08	5.25912e+08	5.44682e+08	6.71358e+08	7.08199e+08	7.03814e+08
High	High	IsMasterProtein	P45954	Short/branched chain specific acyl-CoA dehydrogenase, mitochondrial OS=Homo sapiens GN=ACADSB PE=1 SV=1	0	0	51	17	376	17	1	432	47.5	6.99	8087	592.71	17	12	0	2.58722e+08	2.75233e+08	2.73619e+08	2.67633e+08	2.99647e+08	2.74148e+08	3.23564e+08	3.41094e+08	3.18997e+08
High	High	IsMasterProtein	Q6Y7W6	GRB10-interacting GYF protein 2 OS=Homo sapiens GN=GIGYF2 PE=1 SV=1	0	0	40	53	534	50	1	1299	150	5.54	11037	592.14	52	24	0	3.38051e+08	3.36333e+08	3.21726e+08	3.28031e+08	3.08413e+08	3.33512e+08	3.58027e+08	3.84487e+08	3.68717e+08	Acetyl [N-Term]
High	High	IsMasterProtein	O43390	Heterogeneous nuclear ribonucleoprotein R OS=Homo sapiens GN=HNRNPR PE=1 SV=1	0	0	56	37	786	25	1	633	70.9	8.13	18482	591.32	36	17	13	1.99315e+09	2.035e+09	1.92114e+09	2.05342e+09	2.1584e+09	2.01145e+09	2.24885e+09	2.27193e+09	2.21831e+09	Acetyl [N-Term]
High	High	IsMasterProtein	P37802	Transgelin-2 OS=Homo sapiens GN=TAGLN2 PE=1 SV=3	0	0	81	16	592	16	1	199	22.4	8.25	13154	590.31	16	9	0	2.29654e+09	2.44823e+09	2.36019e+09	2.31449e+09	2.48121e+09	2.45055e+09	2.56389e+09	2.64529e+09	2.3704e+09	Acetyl [N-Term]
High	High	IsMasterProtein	P50579	Methionine aminopeptidase 2 OS=Homo sapiens GN=METAP2 PE=1 SV=1	0	0	64	23	433	23	1	478	52.9	5.82	12093	589.76	22	13	0	6.95274e+07	7.13807e+07	7.16236e+07	9.85943e+07	1.03937e+08	1.01558e+08	2.01609e+08	2.14923e+08	2.02364e+08	Acetyl [N-Term]
High	High	IsMasterProtein	Q99623	Prohibitin-2 OS=Homo sapiens GN=PHB2 PE=1 SV=2	0	0	65	18	617	18	1	299	33.3	9.83	15880	588.72	18	9	0	2.07129e+09	2.04372e+09	1.99038e+09	2.24691e+09	2.19324e+09	2.30533e+09	2.76846e+09	2.88275e+09	2.59479e+09
High	High	IsMasterProtein	P11908	Ribose-phosphate pyrophosphokinase 2 OS=Homo sapiens GN=PRPS2 PE=1 SV=2	0	0	55	16	462	7	1	318	34.7	6.61	10663	588.39	16	10	12	9.13689e+08	9.63164e+08	9.93747e+08	8.96929e+08	9.03192e+08	9.47835e+08	9.71596e+08	9.43546e+08	955261732	Acetyl [N-Term]
High	High	IsMasterProtein	P07339	Cathepsin D OS=Homo sapiens GN=CTSD PE=1 SV=1	0	0	52	18	491	18	1	412	44.5	6.54	11756	587.32	18	10	0	1.05511e+09	1.07431e+09	1.03657e+09	1.1575e+09	1.08801e+09	1.14281e+09	1.54318e+09	1.66921e+09	1572492487
High	High	IsMasterProtein	Q92734	Protein TFG OS=Homo sapiens GN=TFG PE=1 SV=2	0	0	46	16	400	16	1	400	43.4	5.1	9950	587	16	10	0	6.92567e+08	6.98343e+08	7.00259e+08	6.66032e+08	7.18345e+08	7.33677e+08	8.18613e+08	8.75585e+08	8.47455e+08	Acetyl [N-Term]
High	High	IsMasterProtein	Q15020	Squamous cell carcinoma antigen recognized by T-cells 3 OS=Homo sapiens GN=SART3 PE=1 SV=1	0	0	53	50	620	50	1	963	109.9	5.57	15335	586.11	49	22	0	4.53637e+08	4.7654e+08	4.79849e+08	4.68667e+08	4.98462e+08	4.95691e+08	5.91858e+08	5.93983e+08	5.72186e+08	Acetyl [N-Term]
High	High	IsMasterProtein	Q16222	UDP-N-acetylhexosamine pyrophosphorylase OS=Homo sapiens GN=UAP1 PE=1 SV=3	0	0	66	29	498	27	1	522	58.7	6.33	11265	585.6	28	15	2	7.44056e+08	7.89409e+08	7.63137e+08	7.13891e+08	7.06638e+08	7.00061e+08	9.53483e+08	9.51068e+08	9.14743e+08
High	High	IsMasterProtein	Q68E01	Integrator complex subunit 3 OS=Homo sapiens GN=INTS3 PE=1 SV=1	0	0	46	39	423	39	1	1043	118	5.8	9938	585.28	37	22	0	2.15104e+08	2.25684e+08	2.26288e+08	1.95733e+08	2.07562e+08	2.10996e+08	2.27577e+08	2.17361e+08	2.10076e+08
High	High	IsMasterProtein	Q9H3P7	Golgi resident protein GCP60 OS=Homo sapiens GN=ACBD3 PE=1 SV=4	0	0	61	24	435	21	1	528	60.6	5.06	10875	584.48	24	15	0	2.22097e+08	2.34176e+08	2.46248e+08	2.27246e+08	2.32727e+08	2.40702e+08	2.78027e+08	2.84891e+08	2.70711e+08	Acetyl [N-Term]
High	High	IsMasterProtein	P08708	40S ribosomal protein S17 OS=Homo sapiens GN=RPS17 PE=1 SV=2	0	0	61	10	429	9	1	135	15.5	9.85	7850	584.41	10	8	0	8.83133e+08	9.49927e+08	9.74832e+08	1118630132	1.05681e+09	1.09717e+09	1.14658e+09	1.37163e+09	1.18053e+09
High	High	IsMasterProtein	P42167	Lamina-associated polypeptide 2, isoforms beta/gamma OS=Homo sapiens GN=TMPO PE=1 SV=2	0	0	61	23	451	9	1	454	50.6	9.38	11546	583.75	22	16	0	1.72461e+08	1.69319e+08	1.72659e+08	1.72401e+08	1.94715e+08	1.88663e+08	1.61707e+08	1.54889e+08	1.51953e+08
High	High	IsMasterProtein	Q05655	Protein kinase C delta type OS=Homo sapiens GN=PRKCD PE=1 SV=2	0	0	61	37	510	36	1	676	77.5	7.75	12673	581.08	36	21	2	3.12345e+08	3.24251e+08	3.1976e+08	3.61244e+08	3.73902e+08	3.7926e+08	5.21332e+08	5.33757e+08	5.38784e+08
High	High	IsMasterProtein	Q99615	DnaJ homolog subfamily C member 7 OS=Homo sapiens GN=DNAJC7 PE=1 SV=2	0	0	70	42	695	42	1	494	56.4	6.96	15285	580.78	42	15	0	7.51608e+08	7.591e+08	7.73448e+08	7.38922e+08	7.39404e+08	7.73922e+08	8.69465e+08	9.46074e+08	8.69141e+08	Acetyl [N-Term]
High	High	IsMasterProtein	O95373	Importin-7 OS=Homo sapiens GN=IPO7 PE=1 SV=1	0	0	41	41	575	40	1	1038	119.4	4.82	13360	580.4	41	22	1	7.74377e+08	8.20929e+08	8.14623e+08	8.27126e+08	7.76303e+08	8.18053e+08	9.83903e+08	1.0527e+09	9.98108e+08	Acetyl [N-Term]
High	High	IsMasterProtein	P42025	Beta-centractin OS=Homo sapiens GN=ACTR1B PE=1 SV=1	0	0	67	21	381	10	1	376	42.3	6.4	7099	580.17	21	8	0	4.72179e+07	4.63804e+07	4.5329e+07	5.57369e+07	5.09873e+07	6.17172e+07	5.54688e+07	55124122	5.3691e+07	Acetyl [N-Term]
High	High	IsMasterProtein	P31948	Stress-induced-phosphoprotein 1 OS=Homo sapiens GN=STIP1 PE=1 SV=1	0	0	65	40	990	40	1	543	62.6	6.8	21277	580.02	40	11	0	5.46903e+09	5.47977e+09	5.59144e+09	5.32587e+09	5.67051e+09	5.85205e+09	6.39753e+09	6.38922e+09	6.13294e+09	Acetyl [N-Term]
High	High	IsMasterProtein	Q9NXV6	CDKN2A-interacting protein OS=Homo sapiens GN=CDKN2AIP PE=1 SV=3	0	0	65	30	471	30	1	580	61.1	9.01	16263	579.45	30	18	0	1.40328e+08	1.48752e+08	1.49833e+08	1.56676e+08	1.71e+08	1.68353e+08	1.95298e+08	1.87367e+08	1.79001e+08	Acetyl [N-Term]
High	High	IsMasterProtein	Q9NTK5	Obg-like ATPase 1 OS=Homo sapiens GN=OLA1 PE=1 SV=2	0	0	73	27	541	27	1	396	44.7	7.81	11889	579.18	26	15	0	1.25662e+09	1.37368e+09	1.37414e+09	1.40112e+09	1.49481e+09	1.47636e+09	1.63998e+09	1.76058e+09	1.66426e+09
High	High	IsMasterProtein	P49903	Selenide, water dikinase 1 OS=Homo sapiens GN=SEPHS1 PE=1 SV=2	0	0	61	13	389	13	1	392	42.9	5.97	7559	579.03	13	9	0	2.18637e+08	2.02812e+08	2.09543e+08	2.23448e+08	2.27541e+08	2.56143e+08	2.63623e+08	2.81079e+08	2.61019e+08
High	High	IsMasterProtein	P27635	60S ribosomal protein L10 OS=Homo sapiens GN=RPL10 PE=1 SV=4	0	0	43	10	494	10	1	214	24.6	10.08	11631	578.82	10	4	0	1.66838e+09	1.79269e+09	1.77462e+09	1.87905e+09	1.94359e+09	1.98485e+09	2.39472e+09	2214167839	2.13365e+09
High	High	IsMasterProtein	O60341	Lysine-specific histone demethylase 1A OS=Homo sapiens GN=KDM1A PE=1 SV=2	0	0	59	35	481	35	1	852	92.8	6.52	11312	578.72	35	18	0	3.3043e+08	3.3606e+08	3.37831e+08	3.12938e+08	3.13616e+08	3.21046e+08	3.47388e+08	3.50837e+08	3.33239e+08
High	High	IsMasterProtein	Q9Y263	Phospholipase A-2-activating protein OS=Homo sapiens GN=PLAA PE=1 SV=2	0	0	66	46	567	46	1	795	87.1	6.37	13344	578.69	46	26	0	4.20676e+08	4.38189e+08	4.4124e+08	4.56605e+08	4.47619e+08	4.6971e+08	6.01903e+08	5.85543e+08	5.69045e+08
High	High	IsMasterProtein	Q15181	Inorganic pyrophosphatase OS=Homo sapiens GN=PPA1 PE=1 SV=2	0	0	76	19	630	18	1	289	32.6	5.86	14627	578.39	19	10	0	1.83849e+09	1.78664e+09	1.8717e+09	2.03853e+09	2.03647e+09	2.11388e+09	2.21054e+09	2.47967e+09	2.31404e+09	Acetyl [N-Term]
High	High	IsMasterProtein	Q9UBT2	SUMO-activating enzyme subunit 2 OS=Homo sapiens GN=UBA2 PE=1 SV=2	0	0	58	33	423	33	1	640	71.2	5.29	9906	575.9	33	20	0	3.74941e+08	3.64475e+08	3.67265e+08	3.91802e+08	3.72079e+08	4.04084e+08	3.92216e+08	3.90177e+08	3.92786e+08
High	High	IsMasterProtein	Q9H2K8	Serine/threonine-protein kinase TAO3 OS=Homo sapiens GN=TAOK3 PE=1 SV=2	0	0	48	45	526	38	1	898	105.3	7.3	11793	575.25	45	18	8	3.91349e+08	4.11393e+08	4.48691e+08	4.13479e+08	4.37624e+08	4.44523e+08	5.39122e+08	5.74883e+08	5.23045e+08
High	High	IsMasterProtein	Q93008	Probable ubiquitin carboxyl-terminal hydrolase FAF-X OS=Homo sapiens GN=USP9X PE=1 SV=3	0	0	39	85	733	46	1	2570	292.1	5.8	16967	574.51	84	39	42	3.81295e+08	4.01003e+08	4.0173e+08	4.03268e+08	4.2839e+08	4.34299e+08	4.05309e+08	4.04099e+08	3.94966e+08
High	High	IsMasterProtein	P98175	RNA-binding protein 10 OS=Homo sapiens GN=RBM10 PE=1 SV=3	0	0	48	40	535	37	1	930	103.5	5.97	11836	571.31	40	18	3	3.52057e+08	3.67697e+08	3.5902e+08	3.35474e+08	3.55427e+08	3.6937e+08	3.96641e+08	4.32333e+08	3.9797e+08
High	High	IsMasterProtein	P42566	Epidermal growth factor receptor substrate 15 OS=Homo sapiens GN=EPS15 PE=1 SV=2	0	0	60	43	502	43	1	896	98.6	4.64	12102	570.91	43	22	0	2.48841e+08	2.54685e+08	2.49546e+08	2.61029e+08	2.59634e+08	2.64554e+08	3.65154e+08	3.68782e+08	3.53495e+08	Acetyl [N-Term]
High	High	IsMasterProtein	Q9BQG0	Myb-binding protein 1A OS=Homo sapiens GN=MYBBP1A PE=1 SV=2	0	0	49	60	738	60	1	1328	148.8	9.28	17614	570.55	59	32	0	5.79775e+08	5.88692e+08	5.6134e+08	5.63173e+08	5.74614e+08	5.85166e+08	7.26967e+08	7.68618e+08	6.98792e+08	Acetyl [N-Term]
High	High	IsMasterProtein	P61247	40S ribosomal protein S3a OS=Homo sapiens GN=RPS3A PE=1 SV=2	0	0	68	23	685	23	1	264	29.9	9.73	15638	570.41	23	7	0	3.73488e+09	4.11233e+09	3.88074e+09	4.20772e+09	3.86953e+09	4.48258e+09	4.81413e+09	5.04085e+09	5.00097e+09
High	High	IsMasterProtein	Q9UNM6	26S proteasome non-ATPase regulatory subunit 13 OS=Homo sapiens GN=PSMD13 PE=1 SV=2	0	0	69	26	489	26	1	376	42.9	5.81	11945	569.86	26	16	0	1.13047e+09	1.17316e+09	1149219183	1.17956e+09	1.17639e+09	1.17887e+09	1.35008e+09	1.42065e+09	1.35277e+09
High	High	IsMasterProtein	Q12788	Transducin beta-like protein 3 OS=Homo sapiens GN=TBL3 PE=1 SV=2	0	0	58	36	477	36	1	808	89	6.9	12188	569.28	35	20	0	3.1939e+08	3.39212e+08	3.37333e+08	3.06339e+08	3.28865e+08	3.20343e+08	3.55149e+08	3.79863e+08	3.6586e+08	Acetyl [N-Term]
High	High	IsMasterProtein	P53675	Clathrin heavy chain 2 OS=Homo sapiens GN=CLTCL1 PE=1 SV=2	0	0	12	20	625	1	1	1640	186.9	5.85	15105	568	20	14	0
High	High	IsMasterProtein	P84077	ADP-ribosylation factor 1 OS=Homo sapiens GN=ARF1 PE=1 SV=2	0	0	69	13	615	7	1	181	20.7	6.8	15052	567.62	12	7	7	1.96737e+09	1.95937e+09	1.92696e+09	1.8271e+09	1.8187e+09	1.97414e+09	2.40829e+09	2.5579e+09	2.39143e+09
High	High	None	P61204	ADP-ribosylation factor 3 OS=Homo sapiens GN=ARF3 PE=1 SV=2	0	0	64	12	607	6	1	181	20.6	7.43	14825	567.62	11	7	0	1.96663e+09	1.95884e+09	1.92631e+09	1.82673e+09	1.81837e+09	1.9738e+09	2.40802e+09	2.55764e+09	2.39113e+09
High	High	IsMasterProtein	Q5JRX3	Presequence protease, mitochondrial OS=Homo sapiens GN=PITRM1 PE=1 SV=3	0	0	63	53	561	53	1	1037	117.3	6.92	11944	567.51	53	27	0	4.16205e+08	4.5275e+08	4.39993e+08	395863365	4.12991e+08	4.11941e+08	6.44973e+08	7.06337e+08	6.44437e+08
High	High	IsMasterProtein	Q5VTR2	E3 ubiquitin-protein ligase BRE1A OS=Homo sapiens GN=RNF20 PE=1 SV=2	0	0	50	51	525	44	1	975	113.6	5.94	11520	567.32	50	26	0	2.76873e+08	2.80987e+08	2.78824e+08	2.31689e+08	2.35772e+08	2.46977e+08	2.83353e+08	2.86618e+08	2.7476e+08
High	High	IsMasterProtein	P49006	MARCKS-related protein OS=Homo sapiens GN=MARCKSL1 PE=1 SV=2	0	0	78	7	448	6	1	195	19.5	4.67	11474	567	7	5	0	6.29039e+08	6.95168e+08	6.11523e+08	6.13264e+08	6.64051e+08	6.43402e+08	9.06136e+08	8.74086e+08	8.5439e+08
High	High	IsMasterProtein	O60282	Kinesin heavy chain isoform 5C OS=Homo sapiens GN=KIF5C PE=1 SV=1	0	0	48	40	478	25	1	957	109.4	6.19	10965	566.86	38	22	0	2.25406e+07	2.53493e+07	2.62228e+07	3.74639e+07	3.57443e+07	3.96198e+07	40152612	3.71684e+07	3.65076e+07
High	High	IsMasterProtein	Q9UNS2	COP9 signalosome complex subunit 3 OS=Homo sapiens GN=COPS3 PE=1 SV=3	0	0	54	18	467	18	1	423	47.8	6.65	10869	566.68	18	9	0	5.11369e+08	4.97244e+08	5.2087e+08	5.52417e+08	5.25247e+08	5.35975e+08	6.04966e+08	6.10224e+08	6.12915e+08	Acetyl [N-Term]
High	High	IsMasterProtein	Q13838	Spliceosome RNA helicase DDX39B OS=Homo sapiens GN=DDX39B PE=1 SV=1	0	0	62	26	830	12	1	428	49	5.67	21228	565.81	26	10	0	6.84983e+08	7.23683e+08	7.12443e+08	7.04654e+08	7.61693e+08	7.18683e+08	8.96957e+08	954519967	8.61359e+08	Acetyl [N-Term]
High	High	IsMasterProtein	P30050	60S ribosomal protein L12 OS=Homo sapiens GN=RPL12 PE=1 SV=1	0	0	64	9	449	9	1	165	17.8	9.42	10829	565.44	9	6	0	2.22832e+09	2.19357e+09	2.13128e+09	2.37829e+09	2.58493e+09	2.45983e+09	2.87302e+09	2.72317e+09	2.69786e+09
High	High	IsMasterProtein	O75521	Enoyl-CoA delta isomerase 2, mitochondrial OS=Homo sapiens GN=ECI2 PE=1 SV=4	0	0	53	17	454	17	1	394	43.6	9	10523	564.55	17	13	0	3.98281e+08	3.92861e+08	4.15496e+08	4.22588e+08	4.21194e+08	4.06152e+08	5.28209e+08	5.4525e+08	5.02415e+08
High	High	IsMasterProtein	Q8N1F7	Nuclear pore complex protein Nup93 OS=Homo sapiens GN=NUP93 PE=1 SV=2	0	0	62	51	627	51	1	819	93.4	5.72	14675	564.52	50	18	0	9.51276e+08	1.00753e+09	1.01889e+09	9.33513e+08	9.43112e+08	9.78618e+08	9.98904e+08	1.0138e+09	9.61429e+08
High	High	IsMasterProtein	P51532	Transcription activator BRG1 OS=Homo sapiens GN=SMARCA4 PE=1 SV=2	0	0	32	54	625	33	1	1647	184.5	7.88	15961	564.14	54	25	27	3.96941e+08	3.93066e+08	3.9096e+08	3.72152e+08	3.6217e+08	3.63696e+08	3.84863e+08	3.91536e+08	3.67531e+08	Acetyl [N-Term]
High	High	IsMasterProtein	P62829	60S ribosomal protein L23 OS=Homo sapiens GN=RPL23 PE=1 SV=1	0	0	65	9	392	9	1	140	14.9	10.51	8507	562.44	9	5	0	1.15259e+09	1.08408e+09	1.06994e+09	1.12636e+09	1.25236e+09	1.2377e+09	1.44786e+09	1.51817e+09	1.34242e+09
High	High	IsMasterProtein	Q92597	Protein NDRG1 OS=Homo sapiens GN=NDRG1 PE=1 SV=1	0	0	54	12	452	12	1	394	42.8	5.82	11698	562.26	12	11	0	2.03512e+08	2.0898e+08	2.08854e+08	3.26765e+08	3.36758e+08	3.3629e+08	2.91279e+08	3.17581e+08	2.81612e+08
High	High	IsMasterProtein	O14617	AP-3 complex subunit delta-1 OS=Homo sapiens GN=AP3D1 PE=1 SV=1	0	0	44	41	520	41	1	1153	130.1	8.48	12992	562.23	41	24	0	3.19935e+08	3.38008e+08	3.29805e+08	3.43337e+08	3.40399e+08	3.50382e+08	3.80932e+08	4.12181e+08	3.89617e+08
High	High	IsMasterProtein	Q9Y262	Eukaryotic translation initiation factor 3 subunit L OS=Homo sapiens GN=EIF3L PE=1 SV=1	0	0	60	30	508	30	1	564	66.7	6.34	12452	562	30	13	0	9.89915e+08	9.8477e+08	1.02278e+09	9.99694e+08	9.89423e+08	1.05541e+09	9.37973e+08	9.56982e+08	8.93115e+08	Acetyl [N-Term]
High	High	IsMasterProtein	P52907	F-actin-capping protein subunit alpha-1 OS=Homo sapiens GN=CAPZA1 PE=1 SV=3	0	0	76	15	532	12	1	286	32.9	5.69	12820	561.94	14	11	3	8.37052e+08	8.76177e+08	8.22934e+08	9.6325e+08	1.00797e+09	9.86136e+08	1.23452e+09	1.16043e+09	1.19464e+09	Acetyl [N-Term]
High	High	IsMasterProtein	O43747	AP-1 complex subunit gamma-1 OS=Homo sapiens GN=AP1G1 PE=1 SV=5	0	0	45	36	500	34	1	822	91.3	6.8	12651	561.46	35	13	2	4.8888e+08	4.87562e+08	5.0319e+08	5.25988e+08	5.07301e+08	5.5822e+08	5.51805e+08	5.68896e+08	5.78308e+08
High	High	IsMasterProtein	Q8TEM1	Nuclear pore membrane glycoprotein 210 OS=Homo sapiens GN=NUP210 PE=1 SV=3	0	0	32	44	515	44	1	1887	205	6.81	11553	560.73	43	23	0	2.81494e+08	3.03475e+08	2.96094e+08	3.06059e+08	3.16294e+08	3.17752e+08	3.88826e+08	4.00488e+08	3.69519e+08
High	High	IsMasterProtein	Q13564	NEDD8-activating enzyme E1 regulatory subunit OS=Homo sapiens GN=NAE1 PE=1 SV=1	0	0	65	27	434	27	1	534	60.2	5.4	8422	560.04	27	15	0	4.3842e+08	4.55533e+08	4.73751e+08	471166344	4.78347e+08	4.76854e+08	5.35894e+08	5.60607e+08	5.33586e+08
High	High	IsMasterProtein	P46379	Large proline-rich protein BAG6 OS=Homo sapiens GN=BAG6 PE=1 SV=2	0	0	46	39	563	39	1	1132	119.3	5.6	14164	559.16	39	21	0	5.30114e+08	5.50401e+08	5.33773e+08	5.43448e+08	5.82695e+08	5.7795e+08	6.483e+08	7.02878e+08	6.60012e+08	Acetyl [N-Term]
High	High	IsMasterProtein	P55268	Laminin subunit beta-2 OS=Homo sapiens GN=LAMB2 PE=1 SV=2	0	0	50	62	549	60	1	1798	195.9	6.52	12571	558.09	61	26	2	2.23137e+08	2.40135e+08	2.17203e+08	2.79179e+08	2.70647e+08	2.64795e+08	3.06051e+08	3.15311e+08	3.08116e+08
High	High	IsMasterProtein	O15381	Nuclear valosin-containing protein-like OS=Homo sapiens GN=NVL PE=1 SV=1	0	0	55	41	485	41	1	856	95	6.48	11367	557.46	40	22	0	3.09236e+08	3.27281e+08	3.17233e+08	3.09688e+08	3.25418e+08	3.12224e+08	3.42645e+08	3.62928e+08	3.36863e+08
High	High	IsMasterProtein	Q13561	Dynactin subunit 2 OS=Homo sapiens GN=DCTN2 PE=1 SV=4	0	0	75	20	450	20	1	401	44.2	5.21	9733	556.8	20	13	0	5.56594e+08	5.89664e+08	5.85871e+08	6.28031e+08	6.67227e+08	6.58046e+08	7.00876e+08	7.48615e+08	8.32754e+08
High	High	IsMasterProtein	P18124	60S ribosomal protein L7 OS=Homo sapiens GN=RPL7 PE=1 SV=1	0	0	56	20	491	20	1	248	29.2	10.65	11207	556.02	20	11	0	2.69123e+09	2.68991e+09	2.77009e+09	2.71687e+09	2.90153e+09	2.88613e+09	3.39661e+09	3.56432e+09	3.38133e+09	Acetyl [N-Term]
High	High	IsMasterProtein	P48735	Isocitrate dehydrogenase [NADP], mitochondrial OS=Homo sapiens GN=IDH2 PE=1 SV=2	0	0	56	27	786	25	1	452	50.9	8.69	21708	554.77	27	15	2	1.90485e+09	1.88477e+09	1.89373e+09	1.83092e+09	1.86154e+09	1.89618e+09	2.50449e+09	2.59148e+09	2415294507
High	High	IsMasterProtein	Q7Z2W4	Zinc finger CCCH-type antiviral protein 1 OS=Homo sapiens GN=ZC3HAV1 PE=1 SV=3	0	0	61	46	524	46	1	902	101.4	8.4	12660	553.87	46	22	0	6.4142e+08	6.41043e+08	6.90403e+08	6.79753e+08	6.76479e+08	7.08075e+08	7.55417e+08	7.87549e+08	8.13784e+08	Acetyl [N-Term]
High	High	IsMasterProtein	Q9HCE1	Putative helicase MOV-10 OS=Homo sapiens GN=MOV10 PE=1 SV=2	0	0	54	47	555	47	1	1003	113.6	8.82	12938	552.66	45	23	0	3.39634e+08	3.4826e+08	3.56789e+08	380696260	4.00799e+08	4.06339e+08	4.44446e+08	4.88377e+08	4.64137e+08
High	High	IsMasterProtein	Q15084	Protein disulfide-isomerase A6 OS=Homo sapiens GN=PDIA6 PE=1 SV=1	0	0	52	22	474	22	1	440	48.1	5.08	11571	552.52	20	16	0	1.55918e+09	1.78187e+09	1.56595e+09	1.65603e+09	1.63006e+09	1.68421e+09	1.93066e+09	2.00006e+09	2.02417e+09
High	High	IsMasterProtein	P31946	14-3-3 protein beta/alpha OS=Homo sapiens GN=YWHAB PE=1 SV=3	0	0	71	16	773	8	1	246	28.1	4.83	18065	551.86	16	8	0	2.16299e+09	2.14775e+09	2.08307e+09	2.49718e+09	2.53889e+09	2.44465e+09	2.99272e+09	2.87171e+09	2.87384e+09
High	High	IsMasterProtein	P23381	Tryptophan--tRNA ligase, cytoplasmic OS=Homo sapiens GN=WARS PE=1 SV=2	0	0	72	27	470	27	1	471	53.1	6.23	10809	551.32	27	17	0	8.93547e+08	8.82525e+08	9.09242e+08	9.79749e+08	9.95598e+08	1.05955e+09	1.27442e+09	1.30715e+09	1.23514e+09
High	High	IsMasterProtein	Q9UPQ9	Trinucleotide repeat-containing gene 6B protein OS=Homo sapiens GN=TNRC6B PE=1 SV=4	0	0	45	51	488	51	1	1833	193.9	6.76	13635	551.05	51	32	0	9.77542e+07	9.90972e+07	9.82452e+07	9.49202e+07	9.75776e+07	1.02172e+08	8.56867e+07	9.21025e+07	8.92843e+07
High	High	IsMasterProtein	Q9Y224	UPF0568 protein C14orf166 OS=Homo sapiens GN=C14orf166 PE=1 SV=1	0	0	75	17	415	17	1	244	28.1	6.65	9664	549.13	17	9	0	6.82688e+08	6.72327e+08	6.43735e+08	7.0714e+08	6.91214e+08	7.57871e+08	8.18789e+08	8.81218e+08	8.54431e+08
High	High	IsMasterProtein	Q15021	Condensin complex subunit 1 OS=Homo sapiens GN=NCAPD2 PE=1 SV=3	0	0	49	55	597	55	1	1401	157.1	6.61	14156	548.33	54	26	0	4.54635e+08	4.79503e+08	4.70787e+08	4.07288e+08	4.14276e+08	4.21123e+08	3.71966e+08	3.61805e+08	3.62449e+08
High	High	IsMasterProtein	Q6UWE0	E3 ubiquitin-protein ligase LRSAM1 OS=Homo sapiens GN=LRSAM1 PE=1 SV=1	0	0	67	40	472	39	1	723	83.5	5.94	10141	548.22	37	24	1	2.02631e+08	2.14333e+08	1.90324e+08	2.11779e+08	2.17613e+08	2.29945e+08	2.25145e+08	2.18261e+08	2.0895e+08
High	High	IsMasterProtein	P54727	UV excision repair protein RAD23 homolog B OS=Homo sapiens GN=RAD23B PE=1 SV=1	0	0	54	19	466	16	1	409	43.1	4.84	11154	547.8	19	9	4	1.75107e+09	1.73912e+09	1.7461e+09	1.88244e+09	1.79605e+09	2.00531e+09	2.1841e+09	2.23946e+09	2.16017e+09
High	High	IsMasterProtein	P39687	Acidic leucine-rich nuclear phosphoprotein 32 family member A OS=Homo sapiens GN=ANP32A PE=1 SV=1	0	0	45	14	484	10	1	249	28.6	4.09	10624	547.3	14	7	4	2.33728e+09	2.21986e+09	2.39391e+09	2.47012e+09	2.48832e+09	2.59245e+09	2.98015e+09	2.92851e+09	2.88267e+09
High	High	IsMasterProtein	P13645	Keratin, type I cytoskeletal 10 OS=Homo sapiens GN=KRT10 PE=1 SV=6	0	0	59	33	496	28	1	584	58.8	5.21	12138	547.06	32	18	6	4.32461e+08	4.05813e+08	4.05577e+08	5.24855e+08	5.01857e+08	5.54028e+08	9.46133e+08	9.55309e+08	9.50692e+08
High	High	IsMasterProtein	Q8WUM0	Nuclear pore complex protein Nup133 OS=Homo sapiens GN=NUP133 PE=1 SV=2	0	0	46	41	509	41	1	1156	128.9	5.1	11661	546.11	39	22	0	3.495e+08	3.79076e+08	3.6293e+08	3.63464e+08	3.86346e+08	3.78316e+08	4.33047e+08	4.21071e+08	4.05689e+08	Acetyl [N-Term]
High	High	IsMasterProtein	Q9NVA2	Septin-11 OS=Homo sapiens GN=SEPT11 PE=1 SV=3	0	0	60	24	502	13	1	429	49.4	6.81	10315	546.04	24	13	15	7.67904e+08	8.04693e+08	7.93734e+08	7.70908e+08	8.28574e+08	8.19015e+08	9.42454e+08	9.46877e+08	8.44745e+08	Acetyl [N-Term]
High	High	IsMasterProtein	Q7LBC6	Lysine-specific demethylase 3B OS=Homo sapiens GN=KDM3B PE=1 SV=2	0	0	53	61	504	59	1	1761	191.5	7.18	11656	544.71	60	29	2	1.53085e+08	1.59639e+08	1.58398e+08	1.81774e+08	1.82229e+08	1.86434e+08	1.45712e+08	1.5293e+08	1.35323e+08	Acetyl [N-Term]
High	High	IsMasterProtein	P13861	cAMP-dependent protein kinase type II-alpha regulatory subunit OS=Homo sapiens GN=PRKAR2A PE=1 SV=2	0	0	60	22	474	19	1	404	45.5	5.07	11253	544.36	22	16	4	4.5528e+08	4.78384e+08	4.7411e+08	3.96229e+08	4.01516e+08	4.00036e+08	6.09973e+08	6.40196e+08	6.15092e+08
High	High	IsMasterProtein	Q13347	Eukaryotic translation initiation factor 3 subunit I OS=Homo sapiens GN=EIF3I PE=1 SV=1	0	0	83	23	559	23	1	325	36.5	5.64	13363	544	23	10	0	1.26336e+09	1.26627e+09	1.28808e+09	1.23615e+09	1.25616e+09	1.36306e+09	1.21692e+09	1.23849e+09	1.12926e+09
High	High	IsMasterProtein	Q14690	Protein RRP5 homolog OS=Homo sapiens GN=PDCD11 PE=1 SV=3	0	0	42	72	623	72	1	1871	208.6	8.87	14145	542.81	71	31	0	3.06658e+08	3.21905e+08	3.13078e+08	3.42478e+08	3.38124e+08	3.31062e+08	3.891e+08	3.97842e+08	3.83144e+08	Acetyl [N-Term]
n/a	High	IsMasterProtein	Q15154	Pericentriolar material 1 protein OS=Homo sapiens GN=PCM1 PE=1 SV=4		0	23	29	144	46	1	2024	228.4	5.02		542.78		29	0	2081848	1.82887e+06	1.89894e+06	2.05046e+06	1.71075e+06	1.28911e+06	3.17155e+06	2660815	2166931
High	High	IsMasterProtein	Q7L2H7	Eukaryotic translation initiation factor 3 subunit M OS=Homo sapiens GN=EIF3M PE=1 SV=1	0	0	53	17	457	17	1	374	42.5	5.63	10240	542.41	17	12	0	6.14468e+08	6.24092e+08	6.43127e+08	6.80182e+08	6.69395e+08	6.69034e+08	8.17512e+08	8.29585e+08	7.99843e+08	Acetyl [N-Term]
High	High	IsMasterProtein	Q01844	RNA-binding protein EWS OS=Homo sapiens GN=EWSR1 PE=1 SV=1	0	0	17	9	414	9	1	656	68.4	9.33	10629	541.39	9	7	0	5.28281e+08	6.0061e+08	5.82437e+08	6.19917e+08	6.66751e+08	6.54077e+08	6.69916e+08	7.27239e+08	6.76652e+08
High	High	IsMasterProtein	O14828	Secretory carrier-associated membrane protein 3 OS=Homo sapiens GN=SCAMP3 PE=1 SV=3	0	0	46	16	292	16	1	347	38.3	7.64	7743	541.08	15	10	0	2.29452e+08	2.37792e+08	2.33525e+08	2.82109e+08	2.79367e+08	2.7615e+08	3.78798e+08	3.85171e+08	3.59782e+08
High	High	IsMasterProtein	P39748	Flap endonuclease 1 OS=Homo sapiens GN=FEN1 PE=1 SV=1	0	0	50	15	398	15	1	380	42.6	8.62	8894	540.78	15	8	0	7.73776e+08	7.91317e+08	7.90565e+08	6.8336e+08	7.39315e+08	7.07208e+08	6.0028e+08	6.19607e+08	5.51664e+08
High	High	IsMasterProtein	O14981	TATA-binding protein-associated factor 172 OS=Homo sapiens GN=BTAF1 PE=1 SV=2	0	0	38	56	479	56	1	1849	206.8	6.52	10768	540.72	55	31	0	1.91337e+08	1.99191e+08	1.93217e+08	1.87864e+08	1.94332e+08	1.93574e+08	2.01266e+08	2.01751e+08	1.86769e+08
High	High	IsMasterProtein	P29144	Tripeptidyl-peptidase 2 OS=Homo sapiens GN=TPP2 PE=1 SV=4	0	0	60	60	539	60	1	1249	138.3	6.32	11637	540.68	56	23	0	4.71207e+08	4.78326e+08	4.90742e+08	4.69234e+08	5.03411e+08	4.79295e+08	6.28265e+08	6.78868e+08	6.45911e+08	Acetyl [N-Term]
High	High	IsMasterProtein	O95782	AP-2 complex subunit alpha-1 OS=Homo sapiens GN=AP2A1 PE=1 SV=3	0	0	51	43	591	35	1	977	107.5	7.03	14322	540.6	42	22	8	6.23021e+08	6.46457e+08	6.08255e+08	6.69793e+08	6.91649e+08	7.1364e+08	9.3741e+08	9.47954e+08	9.37387e+08
High	High	IsMasterProtein	P10515	Dihydrolipoyllysine-residue acetyltransferase component of pyruvate dehydrogenase complex, mitochondrial OS=Homo sapiens GN=DLAT PE=1 SV=3	0	0	43	21	391	21	1	647	69	7.84	8557	540.21	21	13	0	4.60146e+08	4.06038e+08	4.40126e+08	4.43644e+08	4.43248e+08	4.75566e+08	5.82552e+08	6.28309e+08	5.9473e+08
High	High	IsMasterProtein	P38919	Eukaryotic initiation factor 4A-III OS=Homo sapiens GN=EIF4A3 PE=1 SV=4	0	0	64	28	653	23	1	411	46.8	6.73	16186	540.09	27	14	0	1.16717e+09	1.23434e+09	1.21184e+09	1.09127e+09	1.1447e+09	1.13795e+09	1.1459e+09	1.20313e+09	1.14466e+09	Acetyl [N-Term]
n/a	High	IsMasterProteinRejected	Q9Y4E1	WASH complex subunit 2C OS=Homo sapiens GN=WASHC2C PE=1 SV=3		0	34	26	137	0	0	1318	144.6	4.79		538.51		26	0
High	High	IsMasterProtein	Q14376	UDP-glucose 4-epimerase OS=Homo sapiens GN=GALE PE=1 SV=2	0	0	59	17	350	17	1	348	38.3	6.73	7229	538.51	17	9	0	2.11712e+08	2.1129e+08	2.14594e+08	2.64409e+08	2.63749e+08	2.56119e+08	2.17554e+08	2.28401e+08	2.31064e+08
High	High	IsMasterProtein	Q13283	Ras GTPase-activating protein-binding protein 1 OS=Homo sapiens GN=G3BP1 PE=1 SV=1	0	0	56	22	567	20	1	466	52.1	5.52	11728	538.24	21	14	2	1.15484e+09	1.17946e+09	1.18575e+09	1.19779e+09	1.19281e+09	1.3194e+09	1.42829e+09	1.43269e+09	1.46005e+09
High	High	IsMasterProtein	P54886	Delta-1-pyrroline-5-carboxylate synthase OS=Homo sapiens GN=ALDH18A1 PE=1 SV=2	0	0	55	43	609	43	1	795	87.2	7.12	14477	538.16	43	26	0	6.78339e+08	7.27119e+08	6.78873e+08	6.53101e+08	6.87543e+08	6.83369e+08	8.14289e+08	8.0344e+08	7.69134e+08
High	High	IsMasterProtein	O75390	Citrate synthase, mitochondrial OS=Homo sapiens GN=CS PE=1 SV=2	0	0	49	20	509	20	1	466	51.7	8.32	10853	537.88	20	8	0	1.47305e+09	1.50282e+09	1.39909e+09	1.3045e+09	1.32359e+09	1.33504e+09	2.31672e+09	2.29197e+09	2.15221e+09
High	High	IsMasterProtein	O94874	E3 UFM1-protein ligase 1 OS=Homo sapiens GN=UFL1 PE=1 SV=2	0	0	53	44	669	44	1	794	89.5	6.79	16011	536.83	43	20	0	6.99285e+08	6.95682e+08	6.87267e+08	7.57566e+08	7.87979e+08	7.81345e+08	8.89192e+08	9.02891e+08	8.46184e+08	Acetyl [N-Term]
High	High	IsMasterProtein	P05387	60S acidic ribosomal protein P2 OS=Homo sapiens GN=RPLP2 PE=1 SV=1	0	0	94	10	353	9	1	115	11.7	4.54	9191	536.76	10	7	1	3.83173e+09	3.80381e+09	4.12485e+09	4.36676e+09	4.64659e+09	4.17265e+09	4.85811e+09	5.25652e+09	5.08902e+09
High	High	IsMasterProtein	P48147	Prolyl endopeptidase OS=Homo sapiens GN=PREP PE=1 SV=2	0	0	77	44	560	44	1	710	80.6	5.86	12683	536.55	42	20	0	3.74025e+08	4.17327e+08	4.12586e+08	4.20124e+08	4.28973e+08	4.3548e+08	5.11592e+08	5.29372e+08	5.02803e+08	Acetyl [N-Term]
High	High	IsMasterProtein	P35998	26S protease regulatory subunit 7 OS=Homo sapiens GN=PSMC2 PE=1 SV=3	0	0	68	30	624	29	1	433	48.6	5.95	14376	536.08	30	15	0	1.45309e+09	1.34541e+09	1.4855e+09	1.52754e+09	1.58318e+09	1.51777e+09	1.67458e+09	1.59794e+09	1.656e+09
High	High	IsMasterProtein	Q92973	Transportin-1 OS=Homo sapiens GN=TNPO1 PE=1 SV=2	0	0	50	39	528	29	1	898	102.3	4.98	12429	535.5	38	18	11	9.33268e+08	9.44203e+08	9.33303e+08	9.10451e+08	9.53742e+08	9.27794e+08	9.68928e+08	1.02776e+09	9.45191e+08
High	High	IsMasterProtein	Q9BYT8	Neurolysin, mitochondrial OS=Homo sapiens GN=NLN PE=1 SV=1	0	0	49	31	419	31	1	704	80.6	6.64	8411	534.86	29	16	0	3.29166e+08	3.29353e+08	3.35311e+08	3.58916e+08	3.77421e+08	3.74419e+08	3.94357e+08	4.18473e+08	4.00661e+08
High	High	IsMasterProtein	Q12792	Twinfilin-1 OS=Homo sapiens GN=TWF1 PE=1 SV=3	0	0	61	22	443	19	1	350	40.3	6.96	10418	534.33	22	9	4	3.54528e+08	3.94037e+08	3.98635e+08	3.64256e+08	3.85791e+08	4.06577e+08	4.99239e+08	5.19209e+08	4.97652e+08	Acetyl [N-Term]
High	High	IsMasterProtein	O60264	SWI/SNF-related matrix-associated actin-dependent regulator of chromatin subfamily A member 5 OS=Homo sapiens GN=SMARCA5 PE=1 SV=1	0	0	55	60	666	46	1	1052	121.8	8.09	15642	534.03	58	24	16	6.56033e+08	6.54763e+08	6.4887e+08	5.91482e+08	5.87836e+08	6.03886e+08	6.41499e+08	6.78772e+08	6.2014e+08	Acetyl [N-Term]
High	High	IsMasterProtein	Q9Y266	Nuclear migration protein nudC OS=Homo sapiens GN=NUDC PE=1 SV=1	0	0	72	33	776	33	1	331	38.2	5.38	19235	532.84	33	20	0	1.79218e+09	1.85709e+09	1.93992e+09	1.8817e+09	1.9491e+09	1.94695e+09	2.09403e+09	2.05551e+09	2.00481e+09
High	High	IsMasterProtein	Q9UBF2	Coatomer subunit gamma-2 OS=Homo sapiens GN=COPG2 PE=1 SV=1	0	0	63	43	584	38	1	871	97.6	5.81	14610	532.81	43	21	0	3.05274e+08	3.15919e+08	3.05518e+08	3.44439e+08	3.44611e+08	3.48797e+08	4.14865e+08	4.47945e+08	4.23222e+08
High	High	IsMasterProtein	P53992	Protein transport protein Sec24C OS=Homo sapiens GN=SEC24C PE=1 SV=3	0	0	49	39	592	36	1	1094	118.2	7.06	14234	531.1	38	22	4	5.88543e+08	5.73446e+08	5.6552e+08	6.4454e+08	6.76113e+08	6.93052e+08	8.98102e+08	9.31349e+08	8.60096e+08
High	High	IsMasterProtein	Q05682	Caldesmon OS=Homo sapiens GN=CALD1 PE=1 SV=3	0	0	38	39	641	38	1	793	93.2	5.66	19264	530.38	39	20	1	7.47021e+08	7.45134e+08	7.49128e+08	6.84092e+08	7.09532e+08	7.5888e+08	1.08413e+09	1.13091e+09	1.12391e+09
High	High	IsMasterProtein	Q9UNE7	E3 ubiquitin-protein ligase CHIP OS=Homo sapiens GN=STUB1 PE=1 SV=2	0	0	70	29	482	29	1	303	34.8	5.87	11188	529.2	29	13	0	5.69746e+08	5.47894e+08	5.64579e+08	6.2693e+08	6.14956e+08	6.99332e+08	6.42556e+08	6.737e+08	6.4048e+08
High	High	IsMasterProtein	Q12873	Chromodomain-helicase-DNA-binding protein 3 OS=Homo sapiens GN=CHD3 PE=1 SV=3	0	0	37	63	593	40	1	2000	226.5	7.3	12647	528.32	62	25	7	8.57844e+07	8.96321e+07	8.77831e+07	8.56672e+07	9.02215e+07	9.03612e+07	8.7136e+07	8.87635e+07	8.69521e+07
High	High	IsMasterProtein	Q09028	Histone-binding protein RBBP4 OS=Homo sapiens GN=RBBP4 PE=1 SV=3	0	0	71	23	479	15	1	425	47.6	4.89	11504	528.2	22	13	9	1.61407e+09	1.67772e+09	1.66508e+09	1.53924e+09	1.59897e+09	1.61428e+09	1.59878e+09	1.69099e+09	1.55496e+09
High	High	IsMasterProtein	Q04726	Transducin-like enhancer protein 3 OS=Homo sapiens GN=TLE3 PE=1 SV=2	0	0	49	27	418	21	1	772	83.4	7.2	9707	527.5	26	18	6	2.42354e+08	2.44012e+08	2.47436e+08	2.1862e+08	2.36977e+08	2.22658e+08	2.36431e+08	2.39564e+08	2.34535e+08
High	High	None	Q9H853	Putative tubulin-like protein alpha-4B OS=Homo sapiens GN=TUBA4B PE=5 SV=2	0	0	14	3	614	0	2	241	27.5	7.83	15221	527.45	3	2	0	4.8188e+09	5.44877e+09	3.48009e+09	4.11807e+09	4.47269e+09	4.48699e+09	3.58581e+09	3.44574e+09	4.3929e+09
High	High	IsMasterProtein	Q9BXJ9	N-alpha-acetyltransferase 15, NatA auxiliary subunit OS=Homo sapiens GN=NAA15 PE=1 SV=1	0	0	54	50	676	41	1	866	101.2	7.42	15790	526.56	49	22	13	7.48679e+08	7.68398e+08	7.62228e+08	7.74409e+08	8.08789e+08	8.29521e+08	1.03528e+09	1.02511e+09	9.80192e+08
High	High	IsMasterProtein	Q13428	Treacle protein OS=Homo sapiens GN=TCOF1 PE=1 SV=3	0	0	37	48	612	48	1	1488	152	9.04	16743	526.45	46	27	0	4.39889e+08	4.53428e+08	4.31148e+08	3.9831e+08	4.03887e+08	4.3564e+08	4.26156e+08	4.47901e+08	4.22525e+08
High	High	IsMasterProtein	Q8TBA6	Golgin subfamily A member 5 OS=Homo sapiens GN=GOLGA5 PE=1 SV=3	0	0	63	36	456	36	1	731	83	5.83	12387	525.7	36	23	0	1.54766e+08	1.6597e+08	1.62209e+08	1.66835e+08	1.75882e+08	1.74146e+08	2.3861e+08	2.24214e+08	2.19708e+08	Acetyl [N-Term]
High	High	IsMasterProtein	P52788	Spermine synthase OS=Homo sapiens GN=SMS PE=1 SV=2	0	0	74	22	399	22	1	366	41.2	5.02	7525	525.66	22	12	0	3.89277e+08	4.00819e+08	3.0003e+08	3.09553e+08	3.29901e+08	3.09022e+08	4.23149e+08	4.20775e+08	3.93481e+08
High	High	IsMasterProtein	P30876	DNA-directed RNA polymerase II subunit RPB2 OS=Homo sapiens GN=POLR2B PE=1 SV=1	0	0	51	50	534	50	1	1174	133.8	6.87	11920	525.05	50	25	0	2.72603e+08	2.78453e+08	2.84714e+08	2.65257e+08	2.69755e+08	2.79056e+08	2.83542e+08	3.04994e+08	2.8675e+08
High	High	IsMasterProtein	P62820	Ras-related protein Rab-1A OS=Homo sapiens GN=RAB1A PE=1 SV=3	0	0	78	17	466	9	1	205	22.7	6.21	10658	524.93	17	9	0	2.02138e+08	2.15415e+08	2.17089e+08	181547528	2.13699e+08	1.8873e+08	2.43069e+08	2.57397e+08	2.53865e+08	Acetyl [N-Term]
High	High	IsMasterProtein	P31942	Heterogeneous nuclear ribonucleoprotein H3 OS=Homo sapiens GN=HNRNPH3 PE=1 SV=2	0	0	71	19	501	17	1	346	36.9	6.87	10773	524.73	19	12	0	2.90762e+08	2.96052e+08	3.00307e+08	3.00774e+08	3.06151e+08	3.13996e+08	3.67637e+08	3.91404e+08	3.47562e+08	Acetyl [N-Term]
High	High	IsMasterProtein	P26358	DNA (cytosine-5)-methyltransferase 1 OS=Homo sapiens GN=DNMT1 PE=1 SV=2	0	0	43	58	589	58	1	1616	183.1	7.75	13776	524.53	57	26	0	1.76581e+08	1.84613e+08	1.84398e+08	2.05162e+08	2.04418e+08	2.07988e+08	1.55552e+08	1.69545e+08	1.54937e+08
High	High	IsMasterProtein	Q9H6Z4	Ran-binding protein 3 OS=Homo sapiens GN=RANBP3 PE=1 SV=1	0	0	53	27	512	27	1	567	60.2	4.78	14912	524.47	26	17	0	4.02643e+08	4.29053e+08	4.09099e+08	4.00373e+08	4.24178e+08	4.1663e+08	4.57417e+08	4.86778e+08	4.26893e+08	Acetyl [N-Term]
High	High	IsMasterProtein	Q92896	Golgi apparatus protein 1 OS=Homo sapiens GN=GLG1 PE=1 SV=2	0	0	49	51	585	51	1	1179	134.5	6.9	13615	524.45	49	25	0	3.37679e+08	3.46382e+08	3.5027e+08	3.49393e+08	3.67784e+08	3.61664e+08	5.02424e+08	5.04104e+08	4.86488e+08
High	High	IsMasterProtein	Q9GZR7	ATP-dependent RNA helicase DDX24 OS=Homo sapiens GN=DDX24 PE=1 SV=1	0	0	46	32	464	32	1	859	96.3	9.06	11294	524.26	32	16	0	1.33242e+08	1.40727e+08	1.38275e+08	1.66381e+08	1.72015e+08	1.6846e+08	2.18039e+08	2.13219e+08	2.09381e+08
High	High	IsMasterProtein	P34913	Bifunctional epoxide hydrolase 2 OS=Homo sapiens GN=EPHX2 PE=1 SV=2	0	0	61	27	375	27	1	555	62.6	6.28	7380	523.98	25	15	0	1.53413e+08	1.65925e+08	1.57036e+08	1.83246e+08	1.88747e+08	1.80915e+08	2.27024e+08	2.1729e+08	2.32839e+08
High	High	IsMasterProtein	Q93052	Lipoma-preferred partner OS=Homo sapiens GN=LPP PE=1 SV=1	0	0	77	32	466	32	1	612	65.7	7.37	9524	523.81	32	24	0	2.7964e+08	2.92368e+08	2.95215e+08	3.22171e+08	3.33608e+08	3.27918e+08	4.09772e+08	4.12623e+08	4.04895e+08
High	High	IsMasterProtein	Q8NFC6	Biorientation of chromosomes in cell division protein 1-like 1 OS=Homo sapiens GN=BOD1L1 PE=1 SV=2	0	0	34	76	606	75	1	3051	330.3	5.08	17253	523.21	73	39	1	1.29215e+08	1.35904e+08	1.40776e+08	1.24743e+08	1.29716e+08	1.37235e+08	1.72446e+08	1.71277e+08	1.66747e+08
High	High	IsMasterProtein	P46782	40S ribosomal protein S5 OS=Homo sapiens GN=RPS5 PE=1 SV=4	0	0	58	14	437	14	1	204	22.9	9.72	11721	523.08	14	6	0	1.67677e+09	1.55589e+09	1.51246e+09	1.80644e+09	2.18606e+09	1.98826e+09	2.32682e+09	2.30082e+09	2.18481e+09	Acetyl [N-Term; N-Term]
High	High	IsMasterProtein	Q14258	E3 ubiquitin/ISG15 ligase TRIM25 OS=Homo sapiens GN=TRIM25 PE=1 SV=2	0	0	64	37	605	37	1	630	70.9	8.09	14431	522.3	35	26	0	8.31179e+08	8.34585e+08	8.77148e+08	8.75827e+08	9.15245e+08	9.06692e+08	1.0359e+09	1.01923e+09	1.02171e+09
High	High	IsMasterProtein	Q13409	Cytoplasmic dynein 1 intermediate chain 2 OS=Homo sapiens GN=DYNC1I2 PE=1 SV=3	0	0	54	26	446	25	1	638	71.4	5.2	11595	522.1	26	16	1	3.19573e+08	3.25122e+08	3.23244e+08	3.02394e+08	2.98935e+08	3.16977e+08	3.57847e+08	3.6038e+08	3.35092e+08
High	High	IsMasterProtein	P11413	Glucose-6-phosphate 1-dehydrogenase OS=Homo sapiens GN=G6PD PE=1 SV=4	0	0	77	39	659	39	1	515	59.2	6.84	15076	521.33	39	18	0	1.15541e+09	1.18151e+09	1.18885e+09	1.21456e+09	1.27189e+09	1.28881e+09	1.44043e+09	1.50376e+09	1.37284e+09	Acetyl [N-Term]
High	High	IsMasterProtein	P48444	Coatomer subunit delta OS=Homo sapiens GN=ARCN1 PE=1 SV=1	0	0	50	30	608	30	1	511	57.2	6.21	15614	521.13	30	15	0	1.04266e+09	1.11336e+09	1.10878e+09	1.05086e+09	1.10648e+09	1.10685e+09	1.21448e+09	1.25115e+09	1.16842e+09	Acetyl [N-Term]
High	High	IsMasterProtein	Q8N1G4	Leucine-rich repeat-containing protein 47 OS=Homo sapiens GN=LRRC47 PE=1 SV=1	0	0	67	34	541	34	1	583	63.4	8.28	14219	521.09	34	20	0	8.32957e+08	8.36218e+08	8.41321e+08	9.10813e+08	9.47006e+08	9.66648e+08	9.69832e+08	1.03235e+09	9.33858e+08	Acetyl [N-Term]
High	High	IsMasterProtein	Q02252	Methylmalonate-semialdehyde dehydrogenase [acylating], mitochondrial OS=Homo sapiens GN=ALDH6A1 PE=1 SV=2	0	0	54	29	573	29	1	535	57.8	8.5	12797	520.96	29	18	0	6.43842e+08	681122858	6.49081e+08	6.86145e+08	7.40446e+08	7.25057e+08	9.76808e+08	9.94977e+08	9.91196e+08
High	High	IsMasterProtein	Q8WWM7	Ataxin-2-like protein OS=Homo sapiens GN=ATXN2L PE=1 SV=2	0	0	48	39	532	39	1	1075	113.3	8.59	11972	520.77	39	18	0	4.69636e+08	5.16746e+08	5.05116e+08	4.87232e+08	5.21447e+08	5.1665e+08	5.66242e+08	5.67092e+08	5.55487e+08	Acetyl [N-Term]
High	High	IsMasterProtein	O75131	Copine-3 OS=Homo sapiens GN=CPNE3 PE=1 SV=1	0	0	52	27	645	26	1	537	60.1	5.85	14655	519.98	27	9	1	3.53209e+09	3.51439e+09	3.46246e+09	3.39318e+09	3.42981e+09	3.59478e+09	4.02548e+09	4.17267e+09	4.06644e+09	Acetyl [N-Term]
High	High	IsMasterProtein	Q16643	Drebrin OS=Homo sapiens GN=DBN1 PE=1 SV=4	0	0	61	31	469	30	1	649	71.4	4.45	10872	518.33	31	14	1	5.1626e+08	4.85262e+08	5.01013e+08	4.9843e+08	5.25329e+08	5.1517e+08	6.31809e+08	6.56983e+08	6.35537e+08	Acetyl [N-Term]
High	High	IsMasterProtein	P35527	Keratin, type I cytoskeletal 9 OS=Homo sapiens GN=KRT9 PE=1 SV=3	0	0	57	26	375	25	1	623	62	5.24	10070	517.52	26	14	0	2.09757e+08	2.04704e+08	2.11689e+08	1.00473e+08	105085985	1.03604e+08	5.5715e+08	5.59687e+08	5.33818e+08
High	High	IsMasterProtein	P10155	60 kDa SS-A/Ro ribonucleoprotein OS=Homo sapiens GN=TROVE2 PE=1 SV=2	0	0	63	29	509	29	1	538	60.6	8.03	11015	517.13	29	15	0	6.0264e+08	6.46279e+08	6.41918e+08	6.73423e+08	7.18338e+08	6.97025e+08	758154811	7.80626e+08	7.12457e+08	Acetyl [N-Term]
High	High	IsMasterProtein	O43504	Ragulator complex protein LAMTOR5 OS=Homo sapiens GN=LAMTOR5 PE=1 SV=1	0	0	97	5	285	5	1	91	9.6	4.87	8350	517.01	5	4	0	2.29647e+08	2.5326e+08	2.56615e+08	2.75988e+08	2.66903e+08	2.8875e+08	3.48091e+08	4.0759e+08	3.71724e+08	Acetyl [N-Term]
High	High	IsMasterProtein	Q9Y4E8	Ubiquitin carboxyl-terminal hydrolase 15 OS=Homo sapiens GN=USP15 PE=1 SV=3	0	0	59	51	575	49	1	981	112.3	5.22	14105	516.93	51	21	2	3.44561e+08	3.59069e+08	3.72312e+08	3.6277e+08	3.73555e+08	3.91221e+08	4.82953e+08	5.26089e+08	5.08291e+08	Acetyl [N-Term]
High	High	IsMasterProtein	Q14103	Heterogeneous nuclear ribonucleoprotein D0 OS=Homo sapiens GN=HNRNPD PE=1 SV=1	0	0	37	18	604	15	1	355	38.4	7.81	14755	515.46	18	12	3	3.98368e+09	4.00735e+09	3.96105e+09	4.07245e+09	4.2879e+09	4.42105e+09	4.3725e+09	5.15654e+09	4.54297e+09
High	High	IsMasterProtein	Q96L91	E1A-binding protein p400 OS=Homo sapiens GN=EP400 PE=1 SV=4	0	0	25	50	353	48	1	3159	343.3	9.19	7558	514.94	48	28	2	5.80912e+07	5.84576e+07	5.47366e+07	5.49997e+07	6.12781e+07	5.69437e+07	6.37587e+07	6.80886e+07	6.37386e+07
High	High	IsMasterProtein	Q9NXG2	THUMP domain-containing protein 1 OS=Homo sapiens GN=THUMPD1 PE=1 SV=2	0	0	73	27	440	27	1	353	39.3	7.88	9433	514.48	27	13	0	4.13782e+08	4.01938e+08	4.06906e+08	4.17286e+08	453692463	4.44822e+08	499147993	5.30743e+08	5.21508e+08	Acetyl [N-Term]
High	High	IsMasterProtein	Q9NUU7	ATP-dependent RNA helicase DDX19A OS=Homo sapiens GN=DDX19A PE=1 SV=1	0	0	67	32	546	6	1	478	53.9	6.58	12401	514.14	32	18	29	5.03217e+08	5.05365e+08	4.90954e+08	5.30391e+08	5.75838e+08	5.56131e+08	6.90283e+08	7.13875e+08	6.66633e+08	Acetyl [N-Term]
High	High	IsMasterProtein	A0AVT1	Ubiquitin-like modifier-activating enzyme 6 OS=Homo sapiens GN=UBA6 PE=1 SV=1	0	0	60	50	593	50	1	1052	117.9	6.14	12964	513.93	50	21	0	5.27174e+08	5.61591e+08	5.34295e+08	5.32243e+08	5.53958e+08	5.46911e+08	7.28165e+08	7.15782e+08	6.57895e+08	Acetyl [N-Term]
High	High	IsMasterProtein	Q9BSJ8	Extended synaptotagmin-1 OS=Homo sapiens GN=ESYT1 PE=1 SV=1	0	0	46	35	416	35	1	1104	122.8	5.83	8649	512.61	35	22	0	3.31637e+08	3.32231e+08	3.26977e+08	3.59793e+08	3.70872e+08	3.62869e+08	3.65823e+08	3.59601e+08	3.3759e+08
High	High	IsMasterProtein	Q9NRR5	Ubiquilin-4 OS=Homo sapiens GN=UBQLN4 PE=1 SV=2	0	0	46	19	463	13	1	601	63.8	5.22	10109	512.09	19	13	8	3.79761e+08	3.94327e+08	3.898e+08	3.81369e+08	4.02422e+08	3.9519e+08	4.18103e+08	4.04973e+08	4.04102e+08	Acetyl [N-Term]
High	High	IsMasterProtein	Q9BW04	Specifically androgen-regulated gene protein OS=Homo sapiens GN=SARG PE=1 SV=2	0	0	66	31	501	31	1	601	63.9	8.62	12623	511.96	30	20	0	5.8333e+08	5.9249e+08	5.87455e+08	6.01571e+08	6.41013e+08	6.52406e+08	5.76945e+08	5.62839e+08	5.34892e+08
High	High	IsMasterProtein	P62333	26S protease regulatory subunit 10B OS=Homo sapiens GN=PSMC6 PE=1 SV=1	0	0	61	23	545	23	1	389	44.1	7.49	13454	511.37	23	13	0	9.08243e+08	9.70387e+08	9.48692e+08	1.00172e+09	1.01941e+09	1.0481e+09	1.15406e+09	1.23408e+09	1.1102e+09
High	High	IsMasterProtein	P61158	Actin-related protein 3 OS=Homo sapiens GN=ACTR3 PE=1 SV=3	0	0	67	27	422	24	1	418	47.3	5.88	8775	510.9	27	12	2	6.89285e+08	6.97565e+08	7.10204e+08	7.92842e+08	7.86236e+08	7.98224e+08	8.66679e+08	8.85385e+08	8.3717e+08	Acetyl [N-Term]
n/a	High	IsMasterProtein	O75150	E3 ubiquitin-protein ligase BRE1B OS=Homo sapiens GN=RNF40 PE=1 SV=4		0	31	27	136	22	1	1001	113.6	6.23		510.49		27	0	1.17466e+08	1.25387e+08	1.23036e+08	1.03299e+08	1.01385e+08	1.1332e+08	1.33912e+08	1.30036e+08	1.16057e+08
High	High	IsMasterProtein	Q02880	DNA topoisomerase 2-beta OS=Homo sapiens GN=TOP2B PE=1 SV=3	0	0	41	67	563	53	1	1626	183.2	8	12639	510.22	66	30	18	3.32881e+08	3.2457e+08	3.27014e+08	3.60172e+08	3.6741e+08	3.71388e+08	3.74673e+08	3.6748e+08	3.61935e+08
High	High	IsMasterProtein	Q96N67	Dedicator of cytokinesis protein 7 OS=Homo sapiens GN=DOCK7 PE=1 SV=4	0	0	39	67	531	58	1	2140	242.4	6.8	12144	510.16	64	30	9	2.18056e+08	2.359e+08	2.35053e+08	2.49432e+08	2.58706e+08	2.5309e+08	296671954	2.98669e+08	2.72803e+08
High	High	IsMasterProtein	Q15418	Ribosomal protein S6 kinase alpha-1 OS=Homo sapiens GN=RPS6KA1 PE=1 SV=2	0	0	59	40	441	27	1	735	82.7	7.83	9235	509.54	40	22	15	3.18951e+08	3.45622e+08	3.25616e+08	3.4253e+08	3.63794e+08	3.6405e+08	3.77718e+08	4.03653e+08	3.70117e+08
High	High	IsMasterProtein	Q7Z460	CLIP-associating protein 1 OS=Homo sapiens GN=CLASP1 PE=1 SV=1	0	0	46	61	549	54	1	1538	169.3	9.03	13400	508.34	59	31	6	2.0356e+08	2.23001e+08	2.12376e+08	2.20107e+08	2.25459e+08	2.31162e+08	1.74528e+08	1.80578e+08	1.60407e+08
High	High	IsMasterProtein	Q15435	Protein phosphatase 1 regulatory subunit 7 OS=Homo sapiens GN=PPP1R7 PE=1 SV=1	0	0	63	22	378	22	1	360	41.5	4.91	9897	507.64	22	11	0	3.16917e+08	3.24755e+08	3.21954e+08	3.35805e+08	3.33019e+08	3.46354e+08	3.92396e+08	3.96413e+08	3.73425e+08
High	High	IsMasterProtein	Q9Y4G6	Talin-2 OS=Homo sapiens GN=TLN2 PE=1 SV=4	0	0	24	47	424	29	1	2542	271.4	5.57	9762	507.52	45	29	0	1.35009e+07	1.60115e+07	16544707	1.28123e+07	1.46214e+07	1.51597e+07	2.448e+07	2.52769e+07	2.19967e+07
High	High	IsMasterProtein	Q96K76	Ubiquitin carboxyl-terminal hydrolase 47 OS=Homo sapiens GN=USP47 PE=1 SV=3	0	0	47	53	577	53	1	1375	157.2	5.08	13962	506.87	53	25	0	2.51276e+08	2.60949e+08	2.586e+08	2.69823e+08	2.69813e+08	2.75623e+08	4.0565e+08	4.06742e+08	3.91329e+08
High	High	IsMasterProtein	P41091	Eukaryotic translation initiation factor 2 subunit 3 OS=Homo sapiens GN=EIF2S3 PE=1 SV=3	0	0	48	19	592	19	1	472	51.1	8.4	14260	506.3	19	10	0	1.63574e+09	1.6701e+09	1.82013e+09	1.62702e+09	1.57296e+09	1707480739	2.09482e+09	2.10117e+09	1.96186e+09	Acetyl [N-Term]
High	High	IsMasterProtein	Q8NHW5	60S acidic ribosomal protein P0-like OS=Homo sapiens GN=RPLP0P6 PE=5 SV=1	0	0	41	11	404	1	1	317	34.3	5.55	8595	506.04	11	8	0
High	High	IsMasterProtein	P22087	rRNA 2'-O-methyltransferase fibrillarin OS=Homo sapiens GN=FBL PE=1 SV=2	0	0	65	25	549	25	1	321	33.8	10.18	12656	505.7	25	12	0	8.96183e+08	8.89091e+08	8.91231e+08	8.40146e+08	8.75561e+08	9.20143e+08	1.08973e+09	1.14703e+09	1.11778e+09
High	High	IsMasterProtein	P52292	Importin subunit alpha-1 OS=Homo sapiens GN=KPNA2 PE=1 SV=1	0	0	49	18	443	18	1	529	57.8	5.4	11959	505.36	18	10	0	5.3839e+08	5.48948e+08	5.28065e+08	5.96226e+08	5.45944e+08	5.89001e+08	5.008e+08	4.81098e+08	5.16629e+08	Acetyl [N-Term]
High	High	IsMasterProtein	Q15042	Rab3 GTPase-activating protein catalytic subunit OS=Homo sapiens GN=RAB3GAP1 PE=1 SV=3	0	0	50	40	402	40	1	981	110.5	5.55	8426	505.28	39	23	0	1.56994e+08	1.60806e+08	1.5671e+08	1.59219e+08	1.75476e+08	1.73148e+08	2.03351e+08	211750955	1.99576e+08
High	High	IsMasterProtein	O95671	N-acetylserotonin O-methyltransferase-like protein OS=Homo sapiens GN=ASMTL PE=1 SV=3	0	0	42	23	395	23	1	621	68.8	6.07	9955	504.03	23	12	0	2.21433e+08	2.13848e+08	2.18052e+08	2.33034e+08	2.40209e+08	2.48344e+08	3.2328e+08	3.28884e+08	3.3272e+08
High	High	None	P24844	Myosin regulatory light polypeptide 9 OS=Homo sapiens GN=MYL9 PE=1 SV=4	0	0	38	8	337	8	1	172	19.8	4.92	6988	503.96	8	6	0	8.26772e+08	9.05573e+08	7.94939e+08	7.71959e+08	7.383e+08	7.73576e+08	8.21748e+08	8.51062e+08	8.71369e+08
High	High	IsMasterProtein	Q2M2I8	AP2-associated protein kinase 1 OS=Homo sapiens GN=AAK1 PE=1 SV=3	0	0	45	28	366	27	1	961	103.8	6.6	8585	503.44	28	18	1	1.18444e+08	1.21931e+08	1.12947e+08	1.45701e+08	9.67972e+07	1.40558e+08	8.82516e+07	8.60459e+07	8.27724e+07
High	High	None	Q58FF7	Putative heat shock protein HSP 90-beta-3 OS=Homo sapiens GN=HSP90AB3P PE=5 SV=1	0	0	24	21	1064	11	1	597	68.3	4.79	23770	503.14	21	10	0	1.41129e+10	1.47964e+10	1.47903e+10	1.43946e+10	1.43143e+10	1.55991e+10	1.60515e+10	1.6378e+10	1.57697e+10
High	High	IsMasterProtein	Q8IX12	Cell division cycle and apoptosis regulator protein 1 OS=Homo sapiens GN=CCAR1 PE=1 SV=2	0	0	40	48	631	46	1	1150	132.7	5.76	14459	502.49	48	18	2	5.8346e+08	6.0375e+08	5.91057e+08	5.99025e+08	6.41821e+08	6.29263e+08	6.65664e+08	6.99637e+08	6.34537e+08
High	High	IsMasterProtein	Q9UHD1	Cysteine and histidine-rich domain-containing protein 1 OS=Homo sapiens GN=CHORDC1 PE=1 SV=2	0	0	73	24	509	24	1	332	37.5	7.87	10882	501.64	24	14	0	1.08536e+09	1.18342e+09	1.15303e+09	1.1224e+09	1.22641e+09	1.18595e+09	1.37244e+09	1.30804e+09	1.35687e+09	Acetyl [N-Term]
High	High	IsMasterProtein	Q96K17	Transcription factor BTF3 homolog 4 OS=Homo sapiens GN=BTF3L4 PE=1 SV=1	0	0	70	11	329	11	1	158	17.3	6.35	6241	501.58	11	8	0	4.07206e+08	4.35291e+08	4.609e+08	4.42275e+08	4.63514e+08	4.64933e+08	4.7752e+08	4.75863e+08	470670211
High	High	IsMasterProtein	Q9UKV3	Apoptotic chromatin condensation inducer in the nucleus OS=Homo sapiens GN=ACIN1 PE=1 SV=2	0	0	48	58	684	57	1	1341	151.8	6.43	15171	500.93	57	21	1	4.66347e+08	4.76114e+08	4.86342e+08	4.72042e+08	4.85304e+08	4.87887e+08	5.1441e+08	5.45969e+08	5.10852e+08
High	High	IsMasterProtein	O95573	Long-chain-fatty-acid--CoA ligase 3 OS=Homo sapiens GN=ACSL3 PE=1 SV=3	0	0	59	37	498	34	1	720	80.4	8.38	10800	500.81	37	18	2	4.48767e+08	4.65387e+08	4.78131e+08	4.88548e+08	4.59916e+08	4.91524e+08	5.79148e+08	5.32183e+08	5.36491e+08	Acetyl [N-Term]
High	High	IsMasterProtein	A1L0T0	Acetolactate synthase-like protein OS=Homo sapiens GN=ILVBL PE=1 SV=2	0	0	44	19	283	19	1	632	67.8	8.15	5550	500.48	18	13	0	1.13708e+08	1.23947e+08	1.19556e+08	1.43298e+08	132955470	1.5291e+08	1.5271e+08	1.50147e+08	1.53181e+08
High	High	IsMasterProtein	P68032	Actin, alpha cardiac muscle 1 OS=Homo sapiens GN=ACTC1 PE=1 SV=1	0	0	45	18	1198	4	1	377	42	5.39	29040	500.19	18	7	0	2.71024e+09	4.19279e+09	3.24565e+09	4.34883e+09	4.17912e+09	3.82618e+09	5.24346e+09	3.5307e+09	4.84635e+09
High	High	IsMasterProteinCandidate	P68133	Actin, alpha skeletal muscle OS=Homo sapiens GN=ACTA1 PE=1 SV=1	0	0	45	18	1198	4	1	377	42	5.39	29040	500.19	18	7	0	2.71024e+09	4.19279e+09	3.24565e+09	4.34883e+09	4.17912e+09	3.82618e+09	5.24346e+09	3.5307e+09	4.84635e+09
High	High	None	P62736	Actin, aortic smooth muscle OS=Homo sapiens GN=ACTA2 PE=1 SV=1	0	0	42	17	903	4	1	377	42	5.39	22346	500.19	17	7	0	2.71024e+09	4.19279e+09	3.24565e+09	4.34883e+09	4.17912e+09	3.82618e+09	5.24346e+09	3.5307e+09	4.84635e+09
High	High	IsMasterProtein	Q14938	Nuclear factor 1 X-type OS=Homo sapiens GN=NFIX PE=1 SV=2	0	0	65	22	320	19	1	502	55.1	8.68	7582	499.43	21	16	3	3.53484e+08	3.62675e+08	3.68347e+08	3.17591e+08	3.36508e+08	3.55261e+08	3.49914e+08	3.72483e+08	3.64884e+08	Acetyl [N-Term]
High	High	IsMasterProtein	P05091	Aldehyde dehydrogenase, mitochondrial OS=Homo sapiens GN=ALDH2 PE=1 SV=2	0	0	57	25	441	22	1	517	56.3	7.05	9913	499.36	25	16	1	4.1036e+08	4.07572e+08	3.99658e+08	4.12756e+08	4.31063e+08	4.21397e+08	6.25749e+08	6.59595e+08	6.12387e+08
High	High	IsMasterProtein	P08758	Annexin A5 OS=Homo sapiens GN=ANXA5 PE=1 SV=2	0	0	82	27	629	26	1	320	35.9	5.05	15258	499.05	27	11	1	2.8015e+09	3.00116e+09	2.84794e+09	2.97882e+09	3.14481e+09	3.11034e+09	3.09997e+09	3.30186e+09	3.2002e+09
High	High	IsMasterProtein	Q9NR45	Sialic acid synthase OS=Homo sapiens GN=NANS PE=1 SV=2	0	0	66	19	513	19	1	359	40.3	6.74	13063	498.78	19	12	0	7.71376e+08	7.83471e+08	7.84246e+08	7.69667e+08	8.32315e+08	8.35883e+08	8.58691e+08	9.31177e+08	8.44354e+08
High	High	IsMasterProtein	Q13618	Cullin-3 OS=Homo sapiens GN=CUL3 PE=1 SV=2	0	0	50	41	482	40	1	768	88.9	8.48	11557	498.45	41	21	0	3.44935e+08	3.61096e+08	3.72655e+08	3.62556e+08	3.73187e+08	3.89176e+08	4.4015e+08	4.573e+08	4.10747e+08
High	High	IsMasterProtein	P25787	Proteasome subunit alpha type-2 OS=Homo sapiens GN=PSMA2 PE=1 SV=2	0	0	70	12	329	12	1	234	25.9	7.43	7154	497.49	12	10	0	5.06012e+08	5.13309e+08	5.23608e+08	6.40218e+08	5.86663e+08	6.26898e+08	7.01311e+08	7.03075e+08	7.47198e+08
High	High	IsMasterProtein	Q9UKX7	Nuclear pore complex protein Nup50 OS=Homo sapiens GN=NUP50 PE=1 SV=2	0	0	70	30	426	30	1	468	50.1	7.06	10586	497.24	30	21	0	2.17427e+08	2.31811e+08	2.29114e+08	2.26225e+08	2.41135e+08	2.47601e+08	2.4985e+08	2.52739e+08	2.33809e+08
High	High	IsMasterProtein	Q9H1B7	Interferon regulatory factor 2-binding protein-like OS=Homo sapiens GN=IRF2BPL PE=1 SV=1	0	0	59	38	442	34	1	796	82.6	8.24	10638	497.15	38	16	4	2.4196e+08	2.46654e+08	2.32232e+08	2.44374e+08	2.34448e+08	2.49364e+08	2.38101e+08	2.36117e+08	2.38803e+08	Acetyl [N-Term]
High	High	None	P63267	Actin, gamma-enteric smooth muscle OS=Homo sapiens GN=ACTG2 PE=1 SV=1	0	0	39	15	899	2	1	376	41.9	5.48	22284	497.05	15	6	0	2.71024e+09	4.19026e+09	3.24094e+09	4.34883e+09	4.17672e+09	3.82618e+09	5.24222e+09	3.52958e+09	4.84579e+09
High	High	IsMasterProtein	P33121	Long-chain-fatty-acid--CoA ligase 1 OS=Homo sapiens GN=ACSL1 PE=1 SV=1	0	0	57	35	557	35	1	698	77.9	7.15	12033	496.58	35	18	0	7.17431e+08	7.23048e+08	7.21358e+08	8.43241e+08	8.55453e+08	8.71047e+08	1.16335e+09	1.14403e+09	1.10131e+09	Acetyl [N-Term]
High	High	IsMasterProtein	O60684	Importin subunit alpha-7 OS=Homo sapiens GN=KPNA6 PE=1 SV=1	0	0	40	22	370	9	1	536	60	4.98	8374	496.53	22	13	15	4.43108e+08	4.76173e+08	4.45847e+08	4.01194e+08	3.94017e+08	4.0259e+08	5.45915e+08	5.5529e+08	5.09263e+08	Acetyl [N-Term]
High	High	IsMasterProtein	P42224	Signal transducer and activator of transcription 1-alpha/beta OS=Homo sapiens GN=STAT1 PE=1 SV=2	0	0	50	31	448	31	1	750	87.3	6.05	9977	495.64	31	19	0	3.0441e+08	3.22834e+08	3.23954e+08	3.15268e+08	3.34563e+08	3.27208e+08	3.75784e+08	3.87394e+08	3.69967e+08	Acetyl [N-Term]
High	High	IsMasterProtein	Q92621	Nuclear pore complex protein Nup205 OS=Homo sapiens GN=NUP205 PE=1 SV=3	0	0	37	65	595	64	1	2012	227.8	6.19	12726	495.36	64	31	1	4.53964e+08	4.80383e+08	491076351	4.37417e+08	4.68729e+08	4.7105e+08	5.1546e+08	5.2111e+08	5.11018e+08	Acetyl [N-Term]
n/a	High	IsMasterProtein	P49750	YLP motif-containing protein 1 OS=Homo sapiens GN=YLPM1 PE=1 SV=3		0	22	27	128	39	1	1951	219.8	6.57		493.3		27	0	1.62657e+08	1.67948e+08	1.60156e+08	1.501e+08	1.64353e+08	1.57562e+08	1.81238e+08	1.61202e+08	1.64669e+08
High	High	IsMasterProtein	P17174	Aspartate aminotransferase, cytoplasmic OS=Homo sapiens GN=GOT1 PE=1 SV=3	0	0	65	23	387	23	1	413	46.2	7.01	7791	492.37	23	10	0	1.44573e+09	1.42422e+09	1.39255e+09	1.38589e+09	1.41784e+09	1.43024e+09	1.60953e+09	1.71589e+09	1.72437e+09
n/a	High	IsMasterProtein	O75122	CLIP-associating protein 2 OS=Homo sapiens GN=CLASP2 PE=1 SV=2		0	31	26	131	29	1	1294	141	8.47		492.35		26	0	5.20109e+07	5.26885e+07	5.48905e+07	4.97821e+07	5.34257e+07	4.76961e+07	6.11549e+07	5.82482e+07	5.83843e+07
High	High	IsMasterProtein	O75955	Flotillin-1 OS=Homo sapiens GN=FLOT1 PE=1 SV=3	0	0	75	29	392	29	1	427	47.3	7.49	8852	492.32	29	17	0	2.06872e+08	2.14038e+08	2.02422e+08	2.16037e+08	2.30137e+08	2.44559e+08	2.30602e+08	2.49803e+08	2.37231e+08
High	High	IsMasterProtein	O95793	Double-stranded RNA-binding protein Staufen homolog 1 OS=Homo sapiens GN=STAU1 PE=1 SV=2	0	0	66	36	496	34	1	577	63.1	9.44	12486	491.64	36	21	3	4.15944e+08	4.24452e+08	4.29286e+08	4.32508e+08	4.35531e+08	4.36334e+08	4.47048e+08	4.41608e+08	4.37735e+08	Acetyl [N-Term]
High	High	IsMasterProtein	O60216	Double-strand-break repair protein rad21 homolog OS=Homo sapiens GN=RAD21 PE=1 SV=2	0	0	59	29	388	29	1	631	71.6	4.65	9982	491.44	26	19	0	2.96039e+08	3.1132e+08	2.73353e+08	2.87792e+08	2.22656e+08	3.3676e+08	3.13624e+08	2.50047e+08	2.88939e+08
High	High	IsMasterProtein	Q9UJZ1	Stomatin-like protein 2, mitochondrial OS=Homo sapiens GN=STOML2 PE=1 SV=1	0	0	64	16	345	16	1	356	38.5	7.39	8380	490.81	16	12	0	2.86277e+08	3.00469e+08	2.98012e+08	3.09406e+08	3.16356e+08	3.03196e+08	3.92595e+08	4.22223e+08	3.78336e+08
High	High	IsMasterProtein	O75821	Eukaryotic translation initiation factor 3 subunit G OS=Homo sapiens GN=EIF3G PE=1 SV=2	0	0	68	26	569	26	1	320	35.6	6.13	13903	490.48	26	10	0	8.99558e+08	9.98661e+08	9.80086e+08	8.84105e+08	9.1401e+08	1.02359e+09	1.04525e+09	1.03187e+09	9.59278e+08	Acetyl [N-Term]
High	High	IsMasterProtein	Q02978	Mitochondrial 2-oxoglutarate/malate carrier protein OS=Homo sapiens GN=SLC25A11 PE=1 SV=3	0	0	61	19	480	19	1	314	34	9.91	13054	490.3	18	6	0	6.43906e+08	6.78533e+08	6.63265e+08	6.92412e+08	6.93946e+08	7.0842e+08	9.82838e+08	9.85691e+08	9.72317e+08	Acetyl [N-Term; N-Term]
High	High	IsMasterProtein	P30084	Enoyl-CoA hydratase, mitochondrial OS=Homo sapiens GN=ECHS1 PE=1 SV=4	0	0	62	13	449	13	1	290	31.4	8.07	11182	488.99	13	10	0	1.27246e+09	1.30425e+09	1.27078e+09	1.19596e+09	1.18854e+09	1.28622e+09	1.6736e+09	1.85711e+09	1.7498e+09
High	High	IsMasterProtein	P07384	Calpain-1 catalytic subunit OS=Homo sapiens GN=CAPN1 PE=1 SV=1	0	0	66	45	608	45	1	714	81.8	5.67	13145	488.02	45	20	0	8.35047e+08	8.47783e+08	8.34871e+08	8.73073e+08	9.03855e+08	8.78606e+08	1.14213e+09	1.1305e+09	1.0839e+09	Acetyl [N-Term]
High	High	IsMasterProtein	Q9UKY7	Protein CDV3 homolog OS=Homo sapiens GN=CDV3 PE=1 SV=1	0	0	70	14	375	14	1	258	27.3	6.4	12090	487.7	13	9	0	3.89968e+08	4.06624e+08	4.15142e+08	3.67263e+08	3.58474e+08	3.81294e+08	5.4832e+08	5.43432e+08	5.10341e+08
High	High	IsMasterProtein	Q8NEU8	DCC-interacting protein 13-beta OS=Homo sapiens GN=APPL2 PE=1 SV=3	0	0	69	33	402	32	1	664	74.4	4.94	8652	487.49	32	22	1	1.58369e+08	1.59421e+08	1.53498e+08	1.92972e+08	1.91689e+08	2.05995e+08	1.64084e+08	1.68035e+08	1.68094e+08
High	High	IsMasterProtein	Q8WXH0	Nesprin-2 OS=Homo sapiens GN=SYNE2 PE=1 SV=3	0	0	21	108	509	106	1	6885	795.9	5.36	10603	487.13	101	49	1	1.25747e+08	1.28961e+08	1.28306e+08	1.21776e+08	1.26123e+08	1.37498e+08	1.12743e+08	1.15725e+08	1.14056e+08
High	High	IsMasterProtein	Q9H2P0	Activity-dependent neuroprotector homeobox protein OS=Homo sapiens GN=ADNP PE=1 SV=1	0	0	62	56	527	56	1	1102	123.5	7.34	12217	486.65	56	24	0	3.54693e+08	3.61254e+08	3.69876e+08	3.5129e+08	3.52066e+08	3.73657e+08	3.82223e+08	3.90397e+08	4.00757e+08	Acetyl [N-Term]
High	High	IsMasterProtein	Q9H0A0	RNA cytidine acetyltransferase OS=Homo sapiens GN=NAT10 PE=1 SV=2	0	0	51	45	487	45	1	1025	115.7	8.27	11224	486.42	45	18	0	4.01495e+08	4.30278e+08	4.14693e+08	3.96158e+08	4.15477e+08	4.50384e+08	4.62433e+08	4.75694e+08	4.49286e+08
High	High	IsMasterProtein	Q9NSE4	Isoleucine--tRNA ligase, mitochondrial OS=Homo sapiens GN=IARS2 PE=1 SV=2	0	0	45	36	473	36	1	1012	113.7	7.2	10487	486.06	36	22	0	3.6623e+08	3.86214e+08	3.9324e+08	3.45286e+08	3.59444e+08	3.58837e+08	4.87769e+08	504058997	4.97522e+08
High	High	None	A6NKT7	RanBP2-like and GRIP domain-containing protein 3 OS=Homo sapiens GN=RGPD3 PE=4 SV=2	0	0	33	50	564	4	1	1758	197.4	6.33	15149	485.99	49	25	0	4.75644e+08	4.72821e+08	4.82178e+08	4.66533e+08	4.95252e+08	4.78079e+08	5.70433e+08	6.18174e+08	5.71511e+08
High	High	IsMasterProtein	Q9UMR2	ATP-dependent RNA helicase DDX19B OS=Homo sapiens GN=DDX19B PE=1 SV=1	0	0	67	30	476	4	1	479	53.9	6.3	11135	485.25	30	17	0	1.23809e+07	1.47755e+07	1.53589e+07	1.34474e+07	1.5212e+07	1.28808e+07	1.8152e+07	2.27059e+07	2.03936e+07	Acetyl [N-Term]
High	High	IsMasterProtein	Q9P2R3	Rabankyrin-5 OS=Homo sapiens GN=ANKFY1 PE=1 SV=2	0	0	44	37	414	36	1	1169	128.3	6.1	8866	484.71	36	22	0	1.49001e+08	1.50536e+08	1.46101e+08	1.63332e+08	1.65261e+08	1.76113e+08	1.71306e+08	1.78301e+08	1.69331e+08	Acetyl [N-Term]
High	High	IsMasterProtein	Q13492	Phosphatidylinositol-binding clathrin assembly protein OS=Homo sapiens GN=PICALM PE=1 SV=2	0	0	55	27	339	27	1	652	70.7	7.9	7831	484.12	26	18	0	2.19624e+08	2.29336e+08	2.13631e+08	2.17223e+08	2.09928e+08	2.33638e+08	2.80463e+08	3.0432e+08	2.80372e+08	Acetyl [N-Term]
n/a	High	IsMasterProtein	P20020	Plasma membrane calcium-transporting ATPase 1 OS=Homo sapiens GN=ATP2B1 PE=1 SV=3		0	23	18	127	13	1	1258	138.7	6.04		484.09		18	0
High	High	IsMasterProtein	P61513	60S ribosomal protein L37a OS=Homo sapiens GN=RPL37A PE=1 SV=2	0	0	51	5	316	5	1	92	10.3	10.43	6432	484.01	5	2	0	5.99624e+08	6.55768e+08	5.74814e+08	6.41811e+08	6.99399e+08	6.34905e+08	7.0077e+08	8.18779e+08	8.0278e+08
High	High	IsMasterProtein	Q9H444	Charged multivesicular body protein 4b OS=Homo sapiens GN=CHMP4B PE=1 SV=1	0	0	70	18	376	17	1	224	24.9	4.82	6767	483.7	18	10	1	4.23079e+08	4.52199e+08	4.37511e+08	4.78274e+08	4.44136e+08	5.07455e+08	5.19943e+08	5.589e+08	5.63339e+08
n/a	High	IsMasterProtein	Q4V328	GRIP1-associated protein 1 OS=Homo sapiens GN=GRIPAP1 PE=1 SV=1		0	43	23	122	33	1	841	95.9	5.11		482.42		23	0	1.03265e+08	1.17037e+08	1.02507e+08	1.12834e+08	1.23417e+08	1.18681e+08	1.68613e+08	1.74142e+08	1.49133e+08
High	High	IsMasterProtein	Q8TBC4	NEDD8-activating enzyme E1 catalytic subunit OS=Homo sapiens GN=UBA3 PE=1 SV=2	0	0	62	21	370	21	1	463	51.8	5.45	8641	482.18	21	13	0	4.06632e+08	4.03867e+08	3.95324e+08	4.26807e+08	4.04149e+08	4.04156e+08	4.94325e+08	482318476	4.6978e+08	Acetyl [N-Term]
High	High	IsMasterProtein	Q9HCK8	Chromodomain-helicase-DNA-binding protein 8 OS=Homo sapiens GN=CHD8 PE=1 SV=5	0	0	33	54	407	47	1	2581	290.3	6.47	8673	482.1	53	33	7	9.56494e+07	9.64584e+07	9.14116e+07	9.2232e+07	9.45069e+07	9.67685e+07	9.35066e+07	9.1359e+07	8.77635e+07
High	High	IsMasterProtein	P30048	Thioredoxin-dependent peroxide reductase, mitochondrial OS=Homo sapiens GN=PRDX3 PE=1 SV=3	0	0	55	10	334	10	1	256	27.7	7.78	6848	482.03	10	6	0	1.33224e+09	1.21576e+09	1.24509e+09	1.12326e+09	1.20364e+09	1.19509e+09	1.53961e+09	1.59186e+09	1.4672e+09
High	High	IsMasterProtein	Q16513	Serine/threonine-protein kinase N2 OS=Homo sapiens GN=PKN2 PE=1 SV=1	0	0	53	45	480	41	1	984	112	6.3	11198	481.69	45	22	4	2.81777e+08	3.06618e+08	2.92179e+08	2.61076e+08	2.70251e+08	2.73616e+08	2.83825e+08	2.84334e+08	2.86972e+08	Acetyl [N-Term]
High	High	None	O14983	Sarcoplasmic/endoplasmic reticulum calcium ATPase 1 OS=Homo sapiens GN=ATP2A1 PE=1 SV=1	0	0	15	13	416	13	1	1001	110.2	5.16	9213	481.61	13	6	0	3.72024e+08	3.86273e+08	3.62001e+08	3.79694e+08	3.84207e+08	3.87447e+08	4.90996e+08	5.01849e+08	4.80307e+08
High	High	IsMasterProtein	P21281	V-type proton ATPase subunit B, brain isoform OS=Homo sapiens GN=ATP6V1B2 PE=1 SV=3	0	0	70	29	455	19	1	511	56.5	5.81	10412	481.53	28	20	13	5.17707e+08	5.2459e+08	5.08045e+08	5.65761e+08	5.18486e+08	5.69673e+08	7.37651e+08	7.34191e+08	7.24958e+08
High	High	IsMasterProtein	Q96PK6	RNA-binding protein 14 OS=Homo sapiens GN=RBM14 PE=1 SV=2	0	0	53	33	511	33	1	669	69.4	9.67	13275	480.14	33	6	0	7.40042e+08	8.16297e+08	7.52618e+08	703356807	8.24411e+08	8.18034e+08	8.60397e+08	9.2395e+08	8.46741e+08
High	High	IsMasterProtein	P00966	Argininosuccinate synthase OS=Homo sapiens GN=ASS1 PE=1 SV=2	0	0	55	24	426	24	1	412	46.5	8.02	9029	478.44	24	10	0	7.28563e+08	6.86741e+08	7.17159e+08	8.00342e+08	7.94594e+08	8.00901e+08	9.82448e+08	1.0103e+09	9.9199e+08
High	High	IsMasterProtein	Q9Y5L0	Transportin-3 OS=Homo sapiens GN=TNPO3 PE=1 SV=3	0	0	39	27	378	27	1	923	104.1	5.57	7826	477.77	27	18	0	2.0335e+08	2.08163e+08	1.92583e+08	1.8469e+08	1.82853e+08	1.8937e+08	2.26307e+08	2.22333e+08	2.16529e+08	Acetyl [N-Term]
High	High	IsMasterProtein	Q9UBQ7	Glyoxylate reductase/hydroxypyruvate reductase OS=Homo sapiens GN=GRHPR PE=1 SV=1	0	0	62	18	336	18	1	328	35.6	7.39	7788	477.68	18	13	0	4.66449e+08	5.00027e+08	4.91338e+08	5.28392e+08	5.58934e+08	5.87709e+08	5.82943e+08	5.87116e+08	5.79634e+08
High	High	IsMasterProtein	Q9UNF1	Melanoma-associated antigen D2 OS=Homo sapiens GN=MAGED2 PE=1 SV=2	0	0	57	33	446	32	1	606	64.9	9.32	11138	477.68	32	18	1	2.75387e+08	2.71624e+08	2.82735e+08	2.46468e+08	2.63211e+08	2.68019e+08	3.18724e+08	3.10471e+08	2.98859e+08	Acetyl [N-Term]
High	High	IsMasterProtein	P84085	ADP-ribosylation factor 5 OS=Homo sapiens GN=ARF5 PE=1 SV=2	0	0	68	12	519	6	1	180	20.5	6.79	12221	477.04	12	7	0	2.03478e+08	2.57742e+08	2.55122e+08	2.26776e+08	2.34719e+08	2.86242e+08	3.04434e+08	3.07354e+08	2.79042e+08
High	High	IsMasterProtein	P46100	Transcriptional regulator ATRX OS=Homo sapiens GN=ATRX PE=1 SV=5	0	0	26	56	528	56	1	2492	282.4	6.58	14225	475.13	54	25	0	1.09492e+08	1.1175e+08	1.07818e+08	1.12715e+08	1.05836e+08	1.17175e+08	1.34596e+08	1.37064e+08	1.33179e+08
High	High	IsMasterProtein	Q709C8	Vacuolar protein sorting-associated protein 13C OS=Homo sapiens GN=VPS13C PE=1 SV=1	0	0	30	89	500	88	1	3753	422.1	6.83	11027	475.05	84	38	1	1.74407e+08	1.79303e+08	1.79978e+08	1.61379e+08	1.63103e+08	1.65748e+08	2.1036e+08	2.19936e+08	2.09952e+08
High	High	IsMasterProtein	P11766	Alcohol dehydrogenase class-3 OS=Homo sapiens GN=ADH5 PE=1 SV=4	0	0	59	17	345	17	1	374	39.7	7.49	8651	474.64	17	8	0	5.53453e+08	6.2735e+08	6.08962e+08	5.80887e+08	6.09749e+08	6.12247e+08	7.09956e+08	7.18278e+08	6.70437e+08
High	High	IsMasterProtein	O43396	Thioredoxin-like protein 1 OS=Homo sapiens GN=TXNL1 PE=1 SV=3	0	0	66	20	443	20	1	289	32.2	4.96	10940	474.64	20	14	0	6.08918e+08	6.39387e+08	6.07471e+08	6.30799e+08	6.4572e+08	6.66709e+08	8.8158e+08	9.03315e+08	8.65474e+08	Acetyl [N-Term]
High	High	IsMasterProtein	P53367	Arfaptin-1 OS=Homo sapiens GN=ARFIP1 PE=1 SV=2	0	0	59	17	309	16	1	373	41.7	6.7	6836	474.38	17	11	1	2.42065e+08	2.5635e+08	2.47505e+08	2.76307e+08	2.97185e+08	2.94521e+08	4.13826e+08	4.28482e+08	4.06305e+08
High	High	IsMasterProtein	O43399	Tumor protein D54 OS=Homo sapiens GN=TPD52L2 PE=1 SV=2	0	0	81	20	354	20	1	206	22.2	5.36	8665	474.24	20	13	0	7.97643e+08	7.8881e+08	7.09474e+08	7.45882e+08	7.38329e+08	7.78088e+08	7.76965e+08	7.90836e+08	7.97241e+08	Acetyl [N-Term]
High	High	IsMasterProtein	P40855	Peroxisomal biogenesis factor 19 OS=Homo sapiens GN=PEX19 PE=1 SV=1	0	0	57	14	378	14	1	299	32.8	4.34	10227	474.01	14	7	0	1.56072e+08	1.58585e+08	1.63257e+08	1.69155e+08	1.76998e+08	1.86229e+08	2.13661e+08	2.13645e+08	2.01543e+08
High	High	IsMasterProtein	O43660	Pleiotropic regulator 1 OS=Homo sapiens GN=PLRG1 PE=1 SV=1	0	0	65	27	395	27	1	514	57.2	9.17	8701	472.42	27	12	0	2.22043e+08	2.33092e+08	2.4252e+08	2.30536e+08	2.56182e+08	2.41426e+08	2.59453e+08	2.70271e+08	2.55687e+08
High	High	IsMasterProtein	O00515	Ladinin-1 OS=Homo sapiens GN=LAD1 PE=1 SV=2	0	0	51	32	483	32	1	517	57.1	9.67	11081	471.28	32	16	0	4.40704e+08	4.87193e+08	4.61311e+08	4.70306e+08	4.59229e+08	4.62208e+08	4.44568e+08	4.60466e+08	4.3165e+08
High	High	IsMasterProtein	P40692	DNA mismatch repair protein Mlh1 OS=Homo sapiens GN=MLH1 PE=1 SV=1	0	0	66	41	386	41	1	756	84.5	5.72	7873	470.54	41	17	0	2.31124e+08	2.58947e+08	2.56877e+08	2.32774e+08	2.28377e+08	2.39177e+08	2.29069e+08	2.27183e+08	2.14149e+08	Acetyl [N-Term]
High	High	IsMasterProtein	E9PAV3	Nascent polypeptide-associated complex subunit alpha, muscle-specific form OS=Homo sapiens GN=NACA PE=1 SV=1	0	0	6	8	356	8	1	2078	205.3	9.58	9059	470.16	6	7	0	1.49139e+09	1.63415e+09	1.52579e+09	1.65131e+09	1.69184e+09	1.6818e+09	1.73555e+09	1.79951e+09	1.7381e+09
High	High	IsMasterProteinRejected	Q7Z3J3	RanBP2-like and GRIP domain-containing protein 4 OS=Homo sapiens GN=RGPD4 PE=2 SV=3	0	0	30	45	523	0	0	1758	197.2	6.27	14425	469.41	44	24	0
High	High	IsMasterProtein	P42858	Huntingtin OS=Homo sapiens GN=HTT PE=1 SV=2	0	0	20	45	359	45	1	3142	347.4	6.2	8155	468.64	43	27	0	5.79127e+07	6.01111e+07	5.9913e+07	5.89824e+07	6.11816e+07	6.49063e+07	6.8131e+07	6.93034e+07	6.65065e+07
High	High	IsMasterProtein	P11177	Pyruvate dehydrogenase E1 component subunit beta, mitochondrial OS=Homo sapiens GN=PDHB PE=1 SV=3	0	0	52	15	376	15	1	359	39.2	6.65	8180	468.5	15	10	0	3.73133e+08	3.95383e+08	3.80977e+08	3.90127e+08	3.8973e+08	3.98181e+08	5.17384e+08	5.29727e+08	4.97892e+08
High	High	IsMasterProtein	Q01105	Protein SET OS=Homo sapiens GN=SET PE=1 SV=3	0	0	61	15	411	9	1	290	33.5	4.32	8374	468.49	15	11	5	2.71363e+09	2.78908e+09	2.57103e+09	2.22769e+09	2.48635e+09	2.35272e+09	2.95385e+09	2.33875e+09	2.66461e+09
High	High	IsMasterProtein	Q5JTH9	RRP12-like protein OS=Homo sapiens GN=RRP12 PE=1 SV=2	0	0	45	52	481	51	1	1297	143.6	8.75	9034	468.1	51	23	1	3.37433e+08	3.6499e+08	3.60164e+08	3.50379e+08	3.46236e+08	3.77789e+08	4.08493e+08	4.25676e+08	3.72434e+08
High	High	IsMasterProtein	P47755	F-actin-capping protein subunit alpha-2 OS=Homo sapiens GN=CAPZA2 PE=1 SV=3	0	0	77	15	322	12	1	286	32.9	5.85	7059	467.72	15	11	0	2.36091e+08	2.3293e+08	2.40152e+08	2.77837e+08	2.70792e+08	2.9243e+08	3.40399e+08	3.62915e+08	3.30114e+08	Acetyl [N-Term]
High	High	IsMasterProtein	P13807	Glycogen [starch] synthase, muscle OS=Homo sapiens GN=GYS1 PE=1 SV=2	0	0	55	30	373	30	1	737	83.7	6.18	7696	467.65	30	19	0	1.96725e+08	1.97123e+08	2.02807e+08	2.08175e+08	2.18293e+08	2.12223e+08	3.19818e+08	3.2828e+08	3.24906e+08
High	High	None	Q2VIR3	Putative eukaryotic translation initiation factor 2 subunit 3-like protein OS=Homo sapiens GN=EIF2S3L PE=5 SV=2	0	0	41	16	533	16	1	472	51.2	8.4	12467	467.4	16	8	0	1.36463e+09	1404538414	1.51535e+09	1.30704e+09	1.30476e+09	1.3993e+09	1.70939e+09	1.74016e+09	1.65646e+09	Acetyl [N-Term]
High	High	IsMasterProtein	Q15369	Elongin-C OS=Homo sapiens GN=ELOC PE=1 SV=1	0	0	66	7	330	7	1	112	12.5	4.78	9203	466.79	7	5	0	6.71502e+08	7.91819e+08	6.49875e+08	6.71697e+08	6.25549e+08	7.0804e+08	8.58834e+08	8.81488e+08	8.32207e+08
High	High	IsMasterProtein	Q03252	Lamin-B2 OS=Homo sapiens GN=LMNB2 PE=1 SV=4	0	0	64	49	685	45	1	620	69.9	5.59	15955	465.91	49	19	0	7.04095e+08	7.20885e+08	7.53625e+08	6.21547e+08	6.53343e+08	7.07176e+08	6.92395e+08	7.23004e+08	644280037
High	High	IsMasterProtein	P62879	Guanine nucleotide-binding protein G(I)/G(S)/G(T) subunit beta-2 OS=Homo sapiens GN=GNB2 PE=1 SV=3	0	0	60	15	365	5	1	340	37.3	6	8272	465.79	15	7	3	1.60531e+08	1.32645e+08	1.36675e+08	1.67658e+08	1.70148e+08	1.82028e+08	2.01632e+08	2.1705e+08	2.0279e+08	Acetyl [N-Term]
High	High	IsMasterProtein	Q9NVP1	ATP-dependent RNA helicase DDX18 OS=Homo sapiens GN=DDX18 PE=1 SV=2	0	0	52	34	471	34	1	670	75.4	9.5	12213	465.77	33	20	0	3.14025e+08	3.0342e+08	3.16567e+08	3.19269e+08	3.37856e+08	3.38569e+08	3.6973e+08	4.04878e+08	3.64292e+08
High	High	IsMasterProtein	Q99575	Ribonucleases P/MRP protein subunit POP1 OS=Homo sapiens GN=POP1 PE=1 SV=2	0	0	51	40	411	40	1	1024	114.6	9.22	9743	464.48	39	24	0	1.60678e+08	1.70057e+08	1.73845e+08	1.61866e+08	1.70888e+08	1.66898e+08	1.73512e+08	1.83193e+08	1.68369e+08
High	High	IsMasterProtein	P16152	Carbonyl reductase [NADPH] 1 OS=Homo sapiens GN=CBR1 PE=1 SV=3	0	0	77	18	441	15	1	277	30.4	8.32	11205	463.3	18	10	3	7.33131e+08	7.48306e+08	7.40179e+08	8.53399e+08	8.10037e+08	9.00645e+08	8.05755e+08	8.55321e+08	8.15006e+08	Acetyl [N-Term]
High	High	IsMasterProtein	P62136	Serine/threonine-protein phosphatase PP1-alpha catalytic subunit OS=Homo sapiens GN=PPP1CA PE=1 SV=1	0	0	72	23	502	6	1	330	37.5	6.33	11567	462.56	23	11	19	1.03446e+09	1.03556e+09	1.04735e+09	1.00855e+09	1.0621e+09	1.10913e+09	1.26561e+09	1.25463e+09	1.23902e+09
High	High	IsMasterProtein	Q7Z3T8	Zinc finger FYVE domain-containing protein 16 OS=Homo sapiens GN=ZFYVE16 PE=1 SV=3	0	0	44	44	350	44	1	1539	168.8	4.82	7765	462.34	43	22	0	8.57292e+07	8.29481e+07	8.04367e+07	8.3943e+07	8.57681e+07	9.32268e+07	1.38628e+08	1.43982e+08	1.39891e+08
High	High	IsMasterProtein	P22392	Nucleoside diphosphate kinase B OS=Homo sapiens GN=NME2 PE=1 SV=1	0	0	82	13	449	2	1	152	17.3	8.41	9605	461.82	13	5	15	4.13687e+09	4.5674e+09	4.18449e+09	5.31743e+09	5.55559e+09	5438273463	5.94308e+09	6.24035e+09	5.6213e+09
High	High	IsMasterProtein	Q5T1M5	FK506-binding protein 15 OS=Homo sapiens GN=FKBP15 PE=1 SV=2	0	0	46	42	417	42	1	1219	133.5	5.2	11110	461.58	42	25	0	1.42621e+08	1.46149e+08	1.42728e+08	1.45818e+08	1.42232e+08	1.49148e+08	1.59944e+08	1.91546e+08	1.59233e+08	Acetyl [N-Term]
High	High	IsMasterProtein	Q15819	Ubiquitin-conjugating enzyme E2 variant 2 OS=Homo sapiens GN=UBE2V2 PE=1 SV=4	0	0	59	8	385	3	1	145	16.4	8.09	10071	461.38	8	4	0	8.24163e+07	1.14183e+08	1.30189e+08	1.22803e+08	1.13732e+08	1.31957e+08	1.07006e+08	1.06616e+08	1.00923e+08
High	High	IsMasterProtein	Q9HAV4	Exportin-5 OS=Homo sapiens GN=XPO5 PE=1 SV=1	0	0	41	41	527	41	1	1204	136.2	5.8	11423	460.76	41	22	0	3.41645e+08	3.64623e+08	3.7227e+08	3.80947e+08	4.0119e+08	3.99133e+08	3.58057e+08	3.60879e+08	3.39232e+08	Acetyl [N-Term]
High	High	IsMasterProtein	Q15785	Mitochondrial import receptor subunit TOM34 OS=Homo sapiens GN=TOMM34 PE=1 SV=2	0	0	71	20	378	20	1	309	34.5	8.98	10245	460.08	20	7	0	3.07288e+08	3.0653e+08	2.99239e+08	3.53412e+08	3.40608e+08	3.56012e+08	3.82633e+08	3.94533e+08	3.84756e+08
High	High	IsMasterProtein	P68036	Ubiquitin-conjugating enzyme E2 L3 OS=Homo sapiens GN=UBE2L3 PE=1 SV=1	0	0	73	11	264	10	1	154	17.9	8.51	4684	459.13	11	6	1	8.19669e+08	8.06726e+08	7.80958e+08	7.67811e+08	6.80411e+08	8.12918e+08	9.13248e+08	9.20361e+08	8.42236e+08
High	High	None	B2RPK0	Putative high mobility group protein B1-like 1 OS=Homo sapiens GN=HMGB1P1 PE=5 SV=1	0	0	34	11	436	6	1	211	24.2	6.21	11669	458.9	10	8	0	1.60862e+09	1.75027e+09	1.62457e+09	1.59765e+09	1.69497e+09	1.88435e+09	1.76517e+09	1.80407e+09	1.60764e+09
High	High	IsMasterProtein	Q6DD88	Atlastin-3 OS=Homo sapiens GN=ATL3 PE=1 SV=1	0	0	52	25	417	25	1	541	60.5	5.66	10149	458.86	24	17	0	2.69476e+08	2.59694e+08	2.5501e+08	2.77664e+08	2.84872e+08	2.81249e+08	3.53712e+08	3.41183e+08	3.62812e+08
High	High	IsMasterProtein	Q8NI36	WD repeat-containing protein 36 OS=Homo sapiens GN=WDR36 PE=1 SV=1	0	0	45	35	421	35	1	951	105.3	7.53	9990	458.61	35	18	0	2.40427e+08	2.43131e+08	2.6303e+08	2.39178e+08	2.40451e+08	2.5765e+08	2.82189e+08	3.07095e+08	2.79744e+08
High	High	IsMasterProtein	Q99436	Proteasome subunit beta type-7 OS=Homo sapiens GN=PSMB7 PE=1 SV=1	0	0	51	10	271	10	1	277	29.9	7.68	6349	458.37	9	5	0	4.7259e+08	4.84859e+08	4.83428e+08	5.59067e+08	5.73223e+08	5.25854e+08	6.81274e+08	6.91311e+08	6.85572e+08
High	High	IsMasterProtein	Q9BWF3	RNA-binding protein 4 OS=Homo sapiens GN=RBM4 PE=1 SV=1	0	0	69	20	360	7	1	364	40.3	7.08	9252	458.1	20	7	14	4.2354e+08	4.6178e+08	4.49749e+08	4.24121e+08	4.2766e+08	4.53715e+08	4.75181e+08	5.09188e+08	4.73013e+08
High	High	None	Q13765	Nascent polypeptide-associated complex subunit alpha OS=Homo sapiens GN=NACA PE=1 SV=1	0	0	33	6	353	6	1	215	23.4	4.56	9059	458.03	6	5	0	1.49126e+09	1.63395e+09	1.52579e+09	1.65112e+09	1.69162e+09	1.68163e+09	1.73516e+09	1.7989e+09	1.73763e+09
High	High	IsMasterProtein	O75717	WD repeat and HMG-box DNA-binding protein 1 OS=Homo sapiens GN=WDHD1 PE=1 SV=1	0	0	58	53	491	53	1	1129	125.9	5.62	12421	457.35	51	22	0	3.3865e+08	3.57377e+08	3.46205e+08	3.36902e+08	3.8144e+08	3.57471e+08	3.67631e+08	3.62203e+08	3.36775e+08
High	High	IsMasterProtein	Q96HC4	PDZ and LIM domain protein 5 OS=Homo sapiens GN=PDLIM5 PE=1 SV=5	0	0	52	27	458	27	1	596	63.9	8.21	11717	457.24	27	12	0	2.58292e+08	2.66655e+08	2.47877e+08	3.35366e+08	3.37904e+08	366528944	4.40253e+08	4.51215e+08	4.32676e+08	Acetyl [N-Term]
High	High	IsMasterProtein	P22695	Cytochrome b-c1 complex subunit 2, mitochondrial OS=Homo sapiens GN=UQCRC2 PE=1 SV=3	0	0	46	17	362	17	1	453	48.4	8.63	8148	457.12	17	16	0	7.00785e+08	7.20139e+08	6.88268e+08	6.17639e+08	6.85349e+08	6.57439e+08	7.74034e+08	9.07497e+08	7.91828e+08
High	High	IsMasterProtein	O60271	C-Jun-amino-terminal kinase-interacting protein 4 OS=Homo sapiens GN=SPAG9 PE=1 SV=4	0	0	46	50	448	50	1	1321	146.1	5.15	10175	457.07	50	21	0	1.6581e+08	1.60402e+08	1.61877e+08	1.75991e+08	1.83874e+08	1.84769e+08	2.16724e+08	2.20575e+08	2.18199e+08	Acetyl [N-Term]
High	High	IsMasterProtein	P49756	RNA-binding protein 25 OS=Homo sapiens GN=RBM25 PE=1 SV=3	0	0	40	38	577	37	1	843	100.1	6.32	13383	456.6	38	17	1	3.90128e+08	4.0917e+08	4.06277e+08	3.62908e+08	3.88067e+08	3.94262e+08	4.19166e+08	4.25941e+08	3.96588e+08
High	High	IsMasterProtein	Q9Y3I0	tRNA-splicing ligase RtcB homolog OS=Homo sapiens GN=RTCB PE=1 SV=1	0	0	58	26	531	26	1	505	55.2	7.23	12650	456.59	26	13	0	1.06555e+09	1.08335e+09	1.10704e+09	1.20986e+09	1.21144e+09	1.20839e+09	1.35245e+09	1.35436e+09	1.36887e+09
High	High	IsMasterProtein	Q96P70	Importin-9 OS=Homo sapiens GN=IPO9 PE=1 SV=3	0	0	37	28	452	28	1	1041	115.9	4.81	10200	456.26	28	14	0	4.91391e+08	4.8884e+08	5.00929e+08	4.7835e+08	4.73082e+08	4.89664e+08	5.10037e+08	5.20626e+08	5.10457e+08	Acetyl [N-Term]
High	High	IsMasterProtein	Q8NBS9	Thioredoxin domain-containing protein 5 OS=Homo sapiens GN=TXNDC5 PE=1 SV=2	0	0	51	18	372	18	1	432	47.6	5.97	8757	456.03	18	7	0	4.94938e+08	5.39052e+08	5.9052e+08	6.01447e+08	5.01986e+08	559635826	5.5062e+08	6.15278e+08	5.12612e+08
High	High	IsMasterProtein	Q8IWE2	Protein NOXP20 OS=Homo sapiens GN=FAM114A1 PE=1 SV=2	0	0	65	25	347	25	1	563	60.7	4.68	9328	455.92	25	13	0	1.41271e+08	1.38894e+08	1.4401e+08	1.52773e+08	1.59357e+08	1.64759e+08	1.60372e+08	1.68836e+08	1.65661e+08	Acetyl [N-Term]
High	High	IsMasterProtein	Q96T23	Remodeling and spacing factor 1 OS=Homo sapiens GN=RSF1 PE=1 SV=2	0	0	37	41	416	41	1	1441	163.7	5.01	9754	455.51	40	19	0	1.04872e+08	1.13997e+08	1.12626e+08	1.09985e+08	1.09808e+08	1.19179e+08	1.27251e+08	1.34707e+08	1.33225e+08	Acetyl [N-Term]
High	High	IsMasterProtein	O14787	Transportin-2 OS=Homo sapiens GN=TNPO2 PE=1 SV=3	0	0	46	33	446	23	1	897	101.3	5.01	8840	454.93	32	17	0	2.03233e+08	2.09522e+08	2.16578e+08	2.09941e+08	2.17602e+08	2.23411e+08	2.17725e+08	2.23896e+08	2.12985e+08
High	High	IsMasterProtein	Q07955	Serine/arginine-rich splicing factor 1 OS=Homo sapiens GN=SRSF1 PE=1 SV=2	0	0	66	26	644	25	1	248	27.7	10.36	16622	454.9	25	11	1	1.73176e+09	1.84675e+09	1.88205e+09	1.72259e+09	1.72701e+09	1.85239e+09	1.73635e+09	1.92234e+09	1.82498e+09	Acetyl [N-Term]
High	High	IsMasterProtein	P28838	Cytosol aminopeptidase OS=Homo sapiens GN=LAP3 PE=1 SV=3	0	0	65	30	500	30	1	519	56.1	7.93	11824	454.87	30	16	0	4.43893e+08	4.54307e+08	4.25323e+08	5.64372e+08	5.48544e+08	5.3754e+08	6.30023e+08	6.35392e+08	6.12632e+08
High	High	IsMasterProtein	Q14914	Prostaglandin reductase 1 OS=Homo sapiens GN=PTGR1 PE=1 SV=2	0	0	52	14	385	14	1	329	35.8	8.29	9430	454.73	14	10	0	3.55881e+08	3.52698e+08	3.7753e+08	3.5784e+08	3.78428e+08	4.05925e+08	4.88402e+08	4.99256e+08	4.77695e+08
High	High	IsMasterProtein	Q9BPX3	Condensin complex subunit 3 OS=Homo sapiens GN=NCAPG PE=1 SV=1	0	0	42	35	430	35	1	1015	114.3	5.59	10144	454.23	35	16	0	2.88596e+08	3.18951e+08	3.0181e+08	2.51394e+08	2.62287e+08	2.7436e+08	2.32628e+08	2.41652e+08	2.2762e+08
High	High	IsMasterProtein	O75400	Pre-mRNA-processing factor 40 homolog A OS=Homo sapiens GN=PRPF40A PE=1 SV=2	0	0	36	36	391	34	1	957	108.7	7.56	8033	454.16	36	16	2	3.64934e+08	3.58944e+08	3.51711e+08	3.69068e+08	4.0078e+08	3.95395e+08	4.29848e+08	4.22566e+08	4.28798e+08
High	High	IsMasterProtein	Q9UIQ6	Leucyl-cystinyl aminopeptidase OS=Homo sapiens GN=LNPEP PE=1 SV=3	0	0	36	30	359	30	1	1025	117.3	5.73	8171	454.05	30	14	0	1.83433e+08	188337699	1.88592e+08	1.48063e+08	1.51447e+08	1.50598e+08	2.01648e+08	2.09874e+08	1.84139e+08	Acetyl [N-Term]
High	High	IsMasterProtein	Q14527	Helicase-like transcription factor OS=Homo sapiens GN=HLTF PE=1 SV=2	0	0	58	48	486	48	1	1009	113.9	8.6	10032	453.54	47	22	0	1.71582e+08	1.78693e+08	1.70293e+08	1.69119e+08	1.78774e+08	1.83888e+08	1.76511e+08	1.86051e+08	1.84236e+08
High	High	IsMasterProtein	O00148	ATP-dependent RNA helicase DDX39A OS=Homo sapiens GN=DDX39A PE=1 SV=2	0	0	62	26	663	12	1	427	49.1	5.68	14753	452.9	26	10	17	2.09063e+09	2.12849e+09	2.13232e+09	2.17629e+09	2.20854e+09	2.22736e+09	2.27745e+09	2.52879e+09	2.20016e+09	Acetyl [N-Term]
High	High	IsMasterProtein	Q99614	Tetratricopeptide repeat protein 1 OS=Homo sapiens GN=TTC1 PE=1 SV=1	0	0	77	20	390	20	1	292	33.5	4.84	8987	452.76	20	9	0	1.56974e+08	1.61411e+08	1.62142e+08	1.85101e+08	1.97481e+08	1.93782e+08	2.71544e+08	2.91809e+08	2.53568e+08
High	High	IsMasterProtein	Q12769	Nuclear pore complex protein Nup160 OS=Homo sapiens GN=NUP160 PE=1 SV=3	0	0	34	39	431	39	1	1436	162	5.5	9690	452.04	38	21	0	1.82918e+08	1.95149e+08	1.7877e+08	1.93482e+08	1.87746e+08	1.99359e+08	2.19136e+08	2.13398e+08	2.01405e+08
High	High	IsMasterProtein	O00151	PDZ and LIM domain protein 1 OS=Homo sapiens GN=PDLIM1 PE=1 SV=4	0	0	79	17	329	17	1	329	36	7.02	7176	451.9	17	12	0	2.51285e+08	2.64772e+08	2.60166e+08	2.49843e+08	2.59985e+08	2.55634e+08	2.80771e+08	2.74594e+08	2.59125e+08	Acetyl [N-Term]
High	High	IsMasterProtein	P30040	Endoplasmic reticulum resident protein 29 OS=Homo sapiens GN=ERP29 PE=1 SV=4	0	0	57	12	391	12	1	261	29	7.31	9365	450.28	12	6	0	7.95264e+08	8.07978e+08	8.30725e+08	9.72226e+08	1.00464e+09	1.04695e+09	9.04678e+08	9.40986e+08	8.53629e+08
High	High	IsMasterProtein	Q7Z3K3	Pogo transposable element with ZNF domain OS=Homo sapiens GN=POGZ PE=1 SV=2	0	0	37	36	404	36	1	1410	155.2	7.4	9194	450.07	35	21	0	1.2753e+08	1.34272e+08	1.35001e+08	1.23842e+08	1.19644e+08	1.34812e+08	1.53788e+08	1.62899e+08	1.40087e+08	Acetyl [N-Term]
High	High	IsMasterProtein	Q8TAQ2	SWI/SNF complex subunit SMARCC2 OS=Homo sapiens GN=SMARCC2 PE=1 SV=1	0	0	42	50	575	41	1	1214	132.8	5.69	13332	448.69	50	25	11	4.9715e+08	542058664	5.03768e+08	5.4067e+08	5.59339e+08	5.5964e+08	6.39177e+08	6.18435e+08	6.0038e+08
High	High	IsMasterProtein	Q9H6S3	Epidermal growth factor receptor kinase substrate 8-like protein 2 OS=Homo sapiens GN=EPS8L2 PE=1 SV=2	0	0	51	28	343	28	1	715	80.6	6.84	7600	448.68	28	13	0	2.34995e+08	2.37066e+08	2.42423e+08	2.02314e+08	2.1327e+08	2.13746e+08	223944472	2.32951e+08	2.31858e+08	Acetyl [N-Term]
High	High	IsMasterProtein	O60313	Dynamin-like 120 kDa protein, mitochondrial OS=Homo sapiens GN=OPA1 PE=1 SV=3	0	0	52	52	501	52	1	960	111.6	7.87	11608	448.65	50	23	0	2.89446e+08	3.06581e+08	3.062e+08	2.83325e+08	2.98377e+08	3.05704e+08	3.87519e+08	4.05379e+08	3.70565e+08
High	High	None	Q92928	Putative Ras-related protein Rab-1C OS=Homo sapiens GN=RAB1C PE=5 SV=2	0	0	36	8	363	4	1	201	22	5.43	8476	448.57	8	5	0	9.72898e+08	1.1441e+09	1.06143e+09	1.09209e+09	1.04622e+09	1.07017e+09	1328425245	1.34871e+09	1.35857e+09
High	High	IsMasterProtein	P62873	Guanine nucleotide-binding protein G(I)/G(S)/G(T) subunit beta-1 OS=Homo sapiens GN=GNB1 PE=1 SV=3	0	0	69	16	355	9	1	340	37.4	6	7869	448.43	16	9	9	4.98373e+08	5.34899e+08	5.2222e+08	5.29382e+08	5.53317e+08	5.73882e+08	5.03727e+08	5.15456e+08	4.69775e+08	Acetyl [N-Term]
High	High	IsMasterProtein	Q9NYF8	Bcl-2-associated transcription factor 1 OS=Homo sapiens GN=BCLAF1 PE=1 SV=2	0	0	40	43	667	41	1	920	106.1	9.98	17400	448.25	43	19	2	1.02256e+09	1.17368e+09	1.06663e+09	1.1627e+09	1.20361e+09	1.23655e+09	1.33902e+09	1.32421e+09	1.33878e+09
High	High	IsMasterProtein	Q12874	Splicing factor 3A subunit 3 OS=Homo sapiens GN=SF3A3 PE=1 SV=1	0	0	45	22	358	22	1	501	58.8	5.38	8057	448.07	21	12	0	4.82275e+08	5.40909e+08	5.22925e+08	5.39991e+08	5.56714e+08	5.86369e+08	5.8181e+08	5.95836e+08	5.67626e+08	Acetyl [N-Term]
High	High	IsMasterProtein	P52789	Hexokinase-2 OS=Homo sapiens GN=HK2 PE=1 SV=2	0	0	50	39	443	35	1	917	102.3	6.05	9991	446.94	38	21	0	2.42413e+08	2.59454e+08	2.51771e+08	3.01867e+08	2.95061e+08	3.17334e+08	1.38969e+08	1.45217e+08	1.38972e+08
High	High	IsMasterProtein	Q9BZZ5	Apoptosis inhibitor 5 OS=Homo sapiens GN=API5 PE=1 SV=3	0	0	49	26	435	26	1	524	59	7.34	10238	446.79	26	14	0	4.4951e+08	4.55546e+08	5.01079e+08	4.77315e+08	4.7426e+08	4.86e+08	4.92678e+08	5.28047e+08	5.03732e+08
High	High	IsMasterProtein	Q92841	Probable ATP-dependent RNA helicase DDX17 OS=Homo sapiens GN=DDX17 PE=1 SV=2	0	0	62	42	675	33	1	729	80.2	8.27	16956	446.75	41	22	10	2.25879e+09	2.2805e+09	2.34475e+09	2.42763e+09	2.25891e+09	2.40003e+09	2.4788e+09	2.65778e+09	2.3779e+09
High	High	IsMasterProtein	P56537	Eukaryotic translation initiation factor 6 OS=Homo sapiens GN=EIF6 PE=1 SV=1	0	0	57	9	272	9	1	245	26.6	4.68	6054	446.35	9	8	0	5.19034e+08	5.29082e+08	5.32844e+08	4.95255e+08	6.44259e+08	5.0578e+08	6.19262e+08	7.09913e+08	5.90204e+08
High	High	IsMasterProtein	Q5T6F2	Ubiquitin-associated protein 2 OS=Homo sapiens GN=UBAP2 PE=1 SV=1	0	0	33	21	339	21	1	1119	117	7.34	7658	446.01	21	17	0	1.11312e+08	1.19266e+08	1.15654e+08	1.09204e+08	1.08274e+08	1.09779e+08	9.92381e+07	1.02138e+08	9.86874e+07
High	High	IsMasterProtein	P26232	Catenin alpha-2 OS=Homo sapiens GN=CTNNA2 PE=1 SV=5	0	0	17	14	340	2	1	953	105.2	5.71	9084	446	14	10	0	1.68737e+06	159390	471151			678096		871677
High	High	IsMasterProtein	Q9UNZ2	NSFL1 cofactor p47 OS=Homo sapiens GN=NSFL1C PE=1 SV=2	0	0	76	28	370	28	1	370	40.5	5.1	9037	445.53	28	13	0	3.9174e+08	4.02771e+08	3.9696e+08	4.23431e+08	4.11868e+08	4.33612e+08	5.4194e+08	5.32113e+08	5.46339e+08
High	High	IsMasterProtein	P36873	Serine/threonine-protein phosphatase PP1-gamma catalytic subunit OS=Homo sapiens GN=PPP1CC PE=1 SV=1	0	0	65	19	442	3	1	323	37	6.54	10187	445.45	19	9	0	1.46085e+08	1.5814e+08	1.63119e+08	1.21956e+08	1.10849e+08	1.2612e+08	1.45125e+08	1.4135e+08	126977963
High	High	IsMasterProtein	Q13126	S-methyl-5'-thioadenosine phosphorylase OS=Homo sapiens GN=MTAP PE=1 SV=2	0	0	88	22	386	22	1	283	31.2	7.18	8672	444.81	22	13	0	3.44392e+08	3.4459e+08	3.54076e+08	3.59528e+08	3.52984e+08	3.56513e+08	4.07705e+08	4.17663e+08	4.09561e+08	Acetyl [N-Term]
High	High	IsMasterProtein	Q7Z417	Nuclear fragile X mental retardation-interacting protein 2 OS=Homo sapiens GN=NUFIP2 PE=1 SV=1	0	0	53	26	390	26	1	695	76.1	8.7	9463	444.64	26	18	0	2.78334e+08	2.84817e+08	2.83137e+08	2.67037e+08	2.7024e+08	2.87438e+08	3.39257e+08	360419158	3.41369e+08
High	High	IsMasterProtein	Q6PJT7	Zinc finger CCCH domain-containing protein 14 OS=Homo sapiens GN=ZC3H14 PE=1 SV=1	0	0	60	37	469	37	1	736	82.8	7.31	11278	444.4	37	18	0	1.62226e+08	1.78018e+08	1.74282e+08	1.90209e+08	2.03365e+08	2.01035e+08	2.09744e+08	2.05426e+08	1.9947e+08	Acetyl [N-Term]
High	High	IsMasterProtein	O95202	LETM1 and EF-hand domain-containing protein 1, mitochondrial OS=Homo sapiens GN=LETM1 PE=1 SV=1	0	0	47	29	349	28	1	739	83.3	6.7	7527	444.02	29	19	0	3.00526e+08	3.08667e+08	2.92754e+08	2.24291e+08	2.38196e+08	2.22479e+08	3.33337e+08	3.49053e+08	3.20825e+08
High	High	IsMasterProtein	P18085	ADP-ribosylation factor 4 OS=Homo sapiens GN=ARF4 PE=1 SV=3	0	0	61	9	504	5	1	180	20.5	7.14	12106	443.35	9	6	0	5.9695e+08	6.76101e+08	6.41467e+08	5.39344e+08	5.19168e+08	5.85874e+08	7.23013e+08	7.41241e+08	6.40272e+08
High	High	IsMasterProtein	P51149	Ras-related protein Rab-7a OS=Homo sapiens GN=RAB7A PE=1 SV=1	0	0	80	18	414	18	1	207	23.5	6.7	9366	442.98	18	9	0	7.79676e+08	816059282	7.97894e+08	786077103	8.21971e+08	8.29223e+08	1.02362e+09	1.09867e+09	1.04696e+09
High	High	IsMasterProtein	Q9P2M7	Cingulin OS=Homo sapiens GN=CGN PE=1 SV=2	0	0	55	61	517	59	1	1197	136.3	5.54	12846	442.95	60	23	2	1.97598e+08	2.08891e+08	2.01906e+08	2.26143e+08	2.29814e+08	2.31911e+08	2.72044e+08	2.78308e+08	2.74382e+08
High	High	IsMasterProtein	Q9Y485	DmX-like protein 1 OS=Homo sapiens GN=DMXL1 PE=1 SV=3	0	0	34	68	420	66	1	3027	337.6	6.34	8860	442.95	66	25	2	9.96855e+07	9.99348e+07	1.005e+08	1.18132e+08	1.1589e+08	1.20376e+08	1.48325e+08	1.51445e+08	143929178	Acetyl [N-Term]
High	High	IsMasterProtein	O95433	Activator of 90 kDa heat shock protein ATPase homolog 1 OS=Homo sapiens GN=AHSA1 PE=1 SV=1	0	0	68	19	462	19	1	338	38.3	5.53	9926	442.74	19	13	0	1.18886e+09	1.19791e+09	1.14593e+09	1.27524e+09	1.21856e+09	1.30274e+09	1.5234e+09	1.47266e+09	1.48418e+09
High	High	IsMasterProtein	Q9Y2W1	Thyroid hormone receptor-associated protein 3 OS=Homo sapiens GN=THRAP3 PE=1 SV=2	0	0	42	41	670	39	1	955	108.6	10.15	17313	442.63	40	19	0	9.83655e+08	1.00872e+09	9.91772e+08	1.03555e+09	1.01058e+09	1.04544e+09	9.48055e+08	9.45884e+08	1.00475e+09
High	High	IsMasterProtein	O75146	Huntingtin-interacting protein 1-related protein OS=Homo sapiens GN=HIP1R PE=1 SV=2	0	0	50	46	448	44	1	1068	119.3	6.67	10463	442.18	45	19	2	2.17797e+08	2.28497e+08	2.12181e+08	2.13312e+08	2.12019e+08	2.31752e+08	2.44501e+08	2.54684e+08	2.37004e+08
High	High	IsMasterProtein	O60306	Intron-binding protein aquarius OS=Homo sapiens GN=AQR PE=1 SV=4	0	0	38	47	432	46	1	1485	171.2	6.37	9242	440.61	47	20	0	2.54113e+08	2.68879e+08	2.52978e+08	2.30972e+08	2.48175e+08	2.25091e+08	2.51276e+08	2.53534e+08	2.32849e+08
High	High	IsMasterProtein	P12109	Collagen alpha-1(VI) chain OS=Homo sapiens GN=COL6A1 PE=1 SV=3	0	0	45	34	373	34	1	1028	108.5	5.43	9575	440.34	33	19	0	6.45472e+07	6.67481e+07	6.37217e+07	7.72449e+07	8.02296e+07	8.26596e+07	1.27539e+08	1.31543e+08	1.24562e+08
High	High	IsMasterProtein	P24534	Elongation factor 1-beta OS=Homo sapiens GN=EEF1B2 PE=1 SV=3	0	0	62	14	356	11	1	225	24.7	4.67	7926	440.33	14	8	0	1.4313e+09	1.41444e+09	1.45803e+09	1.66609e+09	1.54848e+09	1.67699e+09	1943355418	2.04393e+09	1.99625e+09
High	High	IsMasterProtein	Q8TEQ6	Gem-associated protein 5 OS=Homo sapiens GN=GEMIN5 PE=1 SV=3	0	0	46	55	486	55	1	1508	168.5	6.62	11241	440.26	55	26	0	2.62409e+08	2.85729e+08	2.67136e+08	2.50002e+08	2.72598e+08	2.76311e+08	3.04877e+08	3.16097e+08	3.05766e+08
High	High	IsMasterProtein	Q13451	Peptidyl-prolyl cis-trans isomerase FKBP5 OS=Homo sapiens GN=FKBP5 PE=1 SV=2	0	0	67	35	487	35	1	457	51.2	5.9	11056	440.08	34	18	0	4.90678e+08	4.7385e+08	5.02202e+08	4.70334e+08	4.28193e+08	4.54753e+08	5.6993e+08	5.40119e+08	4.86775e+08
High	High	IsMasterProtein	Q9Y446	Plakophilin-3 OS=Homo sapiens GN=PKP3 PE=1 SV=1	0	0	64	42	486	42	1	797	87	9.32	11123	440.08	42	20	0	4.69108e+08	4.72235e+08	4.5481e+08	5.22665e+08	4.9288e+08	5.40122e+08	5.66677e+08	5.88553e+08	5.791e+08	Acetyl [N-Term]
High	High	IsMasterProtein	Q9C0C9	(E3-independent) E2 ubiquitin-conjugating enzyme OS=Homo sapiens GN=UBE2O PE=1 SV=3	0	0	49	54	574	54	1	1292	141.2	5.12	13652	439.68	54	28	0	4.03275e+08	4.21861e+08	4.20792e+08	4.16111e+08	4.36915e+08	4.47849e+08	5.95981e+08	5.95884e+08	5.84109e+08
High	High	IsMasterProtein	Q562R1	Beta-actin-like protein 2 OS=Homo sapiens GN=ACTBL2 PE=1 SV=2	0	0	28	8	515	2	1	376	42	5.59	11706	439.62	8	4	0		3.31518e+06	2.44226e+06	2.70891e+06	2.68245e+06	2.96225e+06	3403060	4088812	3.58155e+06
High	High	IsMasterProtein	O75607	Nucleoplasmin-3 OS=Homo sapiens GN=NPM3 PE=1 SV=3	0	0	60	7	259	7	1	178	19.3	4.63	6853	439.59	6	6	0	3.1672e+08	3.23583e+08	3.2367e+08	3.14268e+08	3.45807e+08	3.08802e+08	4.27998e+08	436533524	4.26185e+08	Acetyl [N-Term]
High	High	IsMasterProtein	O60256	Phosphoribosyl pyrophosphate synthase-associated protein 2 OS=Homo sapiens GN=PRPSAP2 PE=1 SV=1	0	0	64	18	308	16	1	369	40.9	7.44	6116	439.17	18	8	3	2.81936e+08	2.78834e+08	2.7865e+08	2.77173e+08	2.51981e+08	2.83335e+08	3.10683e+08	3.27935e+08	3.23393e+08
High	High	IsMasterProtein	Q9BTW9	Tubulin-specific chaperone D OS=Homo sapiens GN=TBCD PE=1 SV=2	0	0	47	45	464	45	1	1192	132.5	6.19	10325	438.88	44	21	0	2.725e+08	2.72724e+08	2.79128e+08	2.68657e+08	2.72051e+08	2.66378e+08	3.1704e+08	3.13665e+08	2.88481e+08
High	High	IsMasterProtein	Q13617	Cullin-2 OS=Homo sapiens GN=CUL2 PE=1 SV=2	0	0	58	36	502	36	1	745	86.9	6.92	11615	438.83	35	13	0	3.45943e+08	3.64354e+08	3.50295e+08	3.56831e+08	3.65372e+08	3.4578e+08	4.62899e+08	4.71041e+08	4.28583e+08
High	High	IsMasterProtein	Q9UBU9	Nuclear RNA export factor 1 OS=Homo sapiens GN=NXF1 PE=1 SV=1	0	0	60	32	447	32	1	619	70.1	8.51	11632	438.75	32	15	0	2.7339e+08	2.81585e+08	2.77279e+08	2.58135e+08	2.69197e+08	2.74844e+08	2.83124e+08	2.65896e+08	2.59299e+08
High	High	IsMasterProtein	P15559	NAD(P)H dehydrogenase [quinone] 1 OS=Homo sapiens GN=NQO1 PE=1 SV=1	0	0	49	18	372	18	1	274	30.8	8.88	7924	438.69	17	13	0	6.03911e+08	6.69568e+08	6.34321e+08	7.16514e+08	8.54617e+08	7.27167e+08	9.99244e+08	1.00074e+09	9.30619e+08
High	High	IsMasterProtein	Q5ZPR3	CD276 antigen OS=Homo sapiens GN=CD276 PE=1 SV=1	0	0	40	10	277	10	1	534	57.2	4.91	6591	438.48	10	8	0	8.32083e+07	9.34712e+07	9.4063e+07	1.03775e+08	1.11575e+08	1.07024e+08	1.5374e+08	1.53454e+08	1.48721e+08
High	High	IsMasterProtein	P52294	Importin subunit alpha-5 OS=Homo sapiens GN=KPNA1 PE=1 SV=3	0	0	39	20	310	9	1	538	60.2	5.01	6812	437.91	20	11	0	6.35856e+07	6.49647e+07	6.86815e+07	7.00236e+07	7.19232e+07	7.04211e+07	8.86275e+07	9.16084e+07	8.8155e+07
High	High	IsMasterProtein	Q7Z4V5	Hepatoma-derived growth factor-related protein 2 OS=Homo sapiens GN=HDGFRP2 PE=1 SV=1	0	0	40	31	421	30	1	671	74.3	7.49	9881	437.66	31	13	1	3.23669e+08	3.38941e+08	3.18064e+08	3.3517e+08	3.3743e+08	3.3483e+08	3.89884e+08	3.90889e+08	3.81986e+08
High	High	IsMasterProtein	P13674	Prolyl 4-hydroxylase subunit alpha-1 OS=Homo sapiens GN=P4HA1 PE=1 SV=2	0	0	54	24	326	24	1	534	61	6.01	6911	437.31	22	15	0	2.38563e+08	2.51989e+08	2.49883e+08	3.70082e+08	3.87334e+08	3.7711e+08	3.26749e+08	3.24655e+08	3.17192e+08
High	High	IsMasterProtein	Q8N9T8	Protein KRI1 homolog OS=Homo sapiens GN=KRI1 PE=1 SV=3	0	0	38	22	337	22	1	703	82.5	5.14	8042	437.07	22	11	0	1.49613e+08	1.64936e+08	1.59375e+08	1.38979e+08	1.43872e+08	1.5561e+08	1.66877e+08	1.84763e+08	1.52062e+08
High	High	IsMasterProtein	O15143	Actin-related protein 2/3 complex subunit 1B OS=Homo sapiens GN=ARPC1B PE=1 SV=3	0	0	50	15	296	14	1	372	40.9	8.35	6868	436.67	15	10	0	2.30068e+08	2.19586e+08	2.43511e+08	3.05282e+08	2.95872e+08	3.08402e+08	3.27093e+08	3.40297e+08	3.19164e+08	Acetyl [N-Term]
High	High	IsMasterProtein	Q06323	Proteasome activator complex subunit 1 OS=Homo sapiens GN=PSME1 PE=1 SV=1	0	0	62	16	486	16	1	249	28.7	6.02	11458	436.09	16	9	0	1.39741e+09	1.41068e+09	1.40978e+09	1.31204e+09	1.48485e+09	1.4397e+09	1.60795e+09	1.67666e+09	1.51677e+09
High	High	IsMasterProtein	P61981	14-3-3 protein gamma OS=Homo sapiens GN=YWHAG PE=1 SV=2	0	0	77	19	777	13	1	247	28.3	4.89	18233	435.73	19	9	7	4.18727e+09	4.4932e+09	4.8998e+09	4.92712e+09	4.89623e+09	4.92103e+09	5.09549e+09	5.4077e+09	5.00931e+09	Acetyl [N-Term]
High	High	IsMasterProtein	O43852	Calumenin OS=Homo sapiens GN=CALU PE=1 SV=2	0	0	67	19	426	19	1	315	37.1	4.64	9563	435.41	19	12	0	6.19235e+08	6.2091e+08	6.405e+08	5.41051e+08	5.4039e+08	5.61035e+08	7.48957e+08	7.89248e+08	7.51576e+08
High	High	IsMasterProtein	Q7Z4S6	Kinesin-like protein KIF21A OS=Homo sapiens GN=KIF21A PE=1 SV=2	0	0	29	35	328	34	1	1674	187.1	6.42	8823	434.88	35	18	1	7.42212e+07	7.89905e+07	7.68826e+07	8.09005e+07	8.66652e+07	8.90846e+07	9.89777e+07	1.02801e+08	9.30122e+07
High	High	IsMasterProtein	P25786	Proteasome subunit alpha type-1 OS=Homo sapiens GN=PSMA1 PE=1 SV=1	0	0	72	18	503	18	1	263	29.5	6.61	10879	434.66	18	9	0	1.08262e+09	1.20721e+09	1.17531e+09	1.3669e+09	1.43939e+09	1.50753e+09	1.78902e+09	1.6932e+09	1.69005e+09
High	High	IsMasterProtein	Q9BTE6	Alanyl-tRNA editing protein Aarsd1 OS=Homo sapiens GN=AARSD1 PE=1 SV=2	0	0	60	21	320	21	1	412	45.5	6.42	6499	434.57	21	13	0	2.19637e+08	2.27781e+08	2.27827e+08	2.45872e+08	2.46167e+08	2.64418e+08	2.77522e+08	2.86581e+08	2.79664e+08
High	High	IsMasterProtein	P55735	Protein SEC13 homolog OS=Homo sapiens GN=SEC13 PE=1 SV=3	0	0	65	20	419	20	1	322	35.5	5.48	9184	433.94	20	14	0	5.52835e+08	5.57745e+08	5.36043e+08	6.07843e+08	6.28313e+08	6.3885e+08	7.05584e+08	7.572e+08	6.99454e+08	Acetyl [N-Term]
High	High	IsMasterProtein	P60228	Eukaryotic translation initiation factor 3 subunit E OS=Homo sapiens GN=EIF3E PE=1 SV=1	0	0	62	25	526	25	1	445	52.2	6.04	12623	433.76	24	9	0	1.08301e+09	1.19698e+09	1.13547e+09	1.11673e+09	1.14578e+09	1.23352e+09	1.3285e+09	1.31396e+09	1.29491e+09	Acetyl [N-Term]
High	High	IsMasterProtein	P68400	Casein kinase II subunit alpha OS=Homo sapiens GN=CSNK2A1 PE=1 SV=1	0	0	61	22	376	20	1	391	45.1	7.74	7445	433.69	22	15	3	5.70229e+08	5.82561e+08	5.53245e+08	5.13479e+08	5.31445e+08	5.42047e+08	6.50329e+08	7.17722e+08	6.18293e+08
High	High	IsMasterProtein	Q9P0K7	Ankycorbin OS=Homo sapiens GN=RAI14 PE=1 SV=2	0	0	56	48	428	48	1	980	110	6.21	9985	433.69	48	18	0	1.54118e+08	1.62478e+08	1.59699e+08	1.64006e+08	1.68623e+08	1.75505e+08	1.68364e+08	1.75474e+08	1.6674e+08
High	High	IsMasterProtein	Q9H6S0	Probable ATP-dependent RNA helicase YTHDC2 OS=Homo sapiens GN=YTHDC2 PE=1 SV=2	0	0	48	51	453	51	1	1430	160.1	8.4	11795	433.29	50	22	0	1.68694e+08	1.76389e+08	1.75236e+08	1.82839e+08	1.85364e+08	1.95318e+08	2.13977e+08	2.22222e+08	2.1225e+08	Acetyl [N-Term]
High	High	IsMasterProtein	P42345	Serine/threonine-protein kinase mTOR OS=Homo sapiens GN=MTOR PE=1 SV=1	0	0	34	61	428	61	1	2549	288.7	7.17	9642	433.12	59	29	0	1.29027e+08	1.28594e+08	1.3648e+08	1.2759e+08	1.32313e+08	1.39179e+08	1.62985e+08	1.63718e+08	1.59628e+08	Acetyl [N-Term]
High	High	IsMasterProtein	Q13098	COP9 signalosome complex subunit 1 OS=Homo sapiens GN=GPS1 PE=1 SV=4	0	0	47	24	409	24	1	491	55.5	6.74	8969	432.83	24	13	0	5.53684e+08	5.41471e+08	5.27331e+08	5.7794e+08	5.79347e+08	6.00692e+08	6.76826e+08	7.08983e+08	6.74234e+08
High	High	IsMasterProtein	Q13501	Sequestosome-1 OS=Homo sapiens GN=SQSTM1 PE=1 SV=1	0	0	70	19	349	19	1	440	47.7	5.22	8824	432.41	18	11	0	1.91926e+08	2.14728e+08	2.053e+08	2.41749e+08	2.51578e+08	2.42982e+08	2.44478e+08	2.48896e+08	2.39247e+08
High	High	IsMasterProtein	Q9H2U1	ATP-dependent RNA helicase DHX36 OS=Homo sapiens GN=DHX36 PE=1 SV=2	0	0	48	39	412	38	1	1008	114.7	7.68	9417	432.17	37	22	1	2.01964e+08	2.21649e+08	2.26366e+08	2.1871e+08	2.35498e+08	2.42315e+08	2.85673e+08	3.00654e+08	2.77454e+08	Acetyl [N-Term]
High	High	IsMasterProtein	O95239	Chromosome-associated kinesin KIF4A OS=Homo sapiens GN=KIF4A PE=1 SV=3	0	0	48	50	469	30	1	1232	139.8	6.27	10938	432.14	49	28	21	1.83216e+08	1.82589e+08	1.84608e+08	1.68013e+08	1.77543e+08	1.78817e+08	1.22388e+08	1.28797e+08	1.24714e+08
High	High	IsMasterProtein	Q8IX01	SURP and G-patch domain-containing protein 2 OS=Homo sapiens GN=SUGP2 PE=1 SV=2	0	0	61	54	418	54	1	1082	120.1	7.28	8975	432.06	54	24	0	2.15061e+08	2.32254e+08	2.32902e+08	2.15958e+08	2.16436e+08	2.2824e+08	2.40281e+08	2.46061e+08	2.26573e+08
High	High	IsMasterProtein	P30622	CAP-Gly domain-containing linker protein 1 OS=Homo sapiens GN=CLIP1 PE=1 SV=2	0	0	44	57	479	52	1	1438	162.1	5.36	11388	430.78	56	28	5	1.61014e+08	1.65966e+08	1.64101e+08	1.82889e+08	1.91502e+08	1.98845e+08	2.37007e+08	2.44765e+08	2.19337e+08
High	High	IsMasterProtein	Q00688	Peptidyl-prolyl cis-trans isomerase FKBP3 OS=Homo sapiens GN=FKBP3 PE=1 SV=1	0	0	52	14	332	14	1	224	25.2	9.28	7752	430.52	13	9	0	1.03866e+09	1.16665e+09	1.02553e+09	1.10637e+09	1.20673e+09	1.16684e+09	1.33028e+09	1.3129e+09	1.28741e+09
High	High	IsMasterProtein	P60900	Proteasome subunit alpha type-6 OS=Homo sapiens GN=PSMA6 PE=1 SV=1	0	0	68	15	449	15	1	246	27.4	6.76	11367	430.49	15	7	0	1.55146e+09	1.51045e+09	1.55179e+09	1.72265e+09	1.71847e+09	1.6983e+09	2.00785e+09	2.17295e+09	1.97917e+09
High	High	IsMasterProtein	Q16555	Dihydropyrimidinase-related protein 2 OS=Homo sapiens GN=DPYSL2 PE=1 SV=1	0	0	63	26	378	23	1	572	62.3	6.38	8741	430.32	25	15	3	2.50595e+08	2.43236e+08	2.61446e+08	2.33783e+08	2.31143e+08	2.20957e+08	2.5461e+08	2.60492e+08	2.39277e+08
High	High	IsMasterProtein	Q6L8Q7	2',5'-phosphodiesterase 12 OS=Homo sapiens GN=PDE12 PE=1 SV=2	0	0	51	24	328	24	1	609	67.3	6.57	8380	430.12	24	12	0	2.0903e+08	2.21994e+08	2.05314e+08	2.08403e+08	2.08309e+08	2.38076e+08	2.80043e+08	2.74954e+08	2.70611e+08
High	High	IsMasterProtein	P14550	Alcohol dehydrogenase [NADP(+)] OS=Homo sapiens GN=AKR1A1 PE=1 SV=3	0	0	70	21	442	21	1	325	36.6	6.79	10536	429.41	21	11	0	1.80592e+09	1.85508e+09	1.80788e+09	1.95386e+09	2.08833e+09	2.12746e+09	2.2983e+09	2.52135e+09	2.26661e+09	Acetyl [N-Term]
High	High	IsMasterProtein	Q12830	Nucleosome-remodeling factor subunit BPTF OS=Homo sapiens GN=BPTF PE=1 SV=3	0	0	24	56	391	56	1	3046	338.1	6.54	9284	428.92	53	28	0	8.50564e+07	8.78242e+07	8.39858e+07	7.80626e+07	8.33842e+07	8.48621e+07	8.5268e+07	8.61302e+07	8.10551e+07
High	High	IsMasterProtein	Q5H9R7	Serine/threonine-protein phosphatase 6 regulatory subunit 3 OS=Homo sapiens GN=PPP6R3 PE=1 SV=2	0	0	50	39	497	38	1	873	97.6	4.6	11212	428.36	39	17	1	3.25076e+08	3.40826e+08	3.52293e+08	3.18377e+08	3.19648e+08	3.33195e+08	3.81951e+08	4.00984e+08	3.79595e+08
High	High	IsMasterProtein	P61289	Proteasome activator complex subunit 3 OS=Homo sapiens GN=PSME3 PE=1 SV=1	0	0	70	18	384	18	1	254	29.5	5.95	9502	427.5	17	12	0	8.95199e+08	9.63341e+08	9.62223e+08	9.34848e+08	9.50747e+08	9.32108e+08	1.00494e+09	1.07771e+09	9.32832e+08
High	High	IsMasterProtein	Q06124	Tyrosine-protein phosphatase non-receptor type 11 OS=Homo sapiens GN=PTPN11 PE=1 SV=2	0	0	74	39	496	39	1	597	68.4	7.3	11467	427.32	39	15	0	4.19806e+08	4.24809e+08	3.91586e+08	4.10524e+08	4.09389e+08	4.21387e+08	4.97744e+08	4.75749e+08	4.82768e+08
High	High	IsMasterProtein	Q12959	Disks large homolog 1 OS=Homo sapiens GN=DLG1 PE=1 SV=2	0	0	50	32	333	25	1	904	100.4	5.76	7601	427	31	18	7	4.93502e+08	1.4953e+08	1.56166e+08	1.47813e+08	1.4923e+08	1.59972e+08	1.4166e+08	1.49818e+08	1.29871e+08
High	High	IsMasterProtein	P82979	SAP domain-containing ribonucleoprotein OS=Homo sapiens GN=SARNP PE=1 SV=3	0	0	65	16	325	16	1	210	23.7	6.42	9181	426.74	16	8	0	3.96497e+08	3.71447e+08	3.54816e+08	3.77608e+08	3.55749e+08	4.00279e+08	4.6762e+08	4.87148e+08	4.84461e+08	Acetyl [N-Term]
High	High	IsMasterProtein	Q9NYB0	Telomeric repeat-binding factor 2-interacting protein 1 OS=Homo sapiens GN=TERF2IP PE=1 SV=1	0	0	64	25	352	25	1	399	44.2	4.73	8501	426.48	25	19	0	1.49558e+08	1.58218e+08	1.66985e+08	1.56309e+08	1.54644e+08	1.5292e+08	1.89392e+08	1.88366e+08	1.7226e+08	Acetyl [N-Term]
High	High	IsMasterProtein	P14678	Small nuclear ribonucleoprotein-associated proteins B and B' OS=Homo sapiens GN=SNRPB PE=1 SV=2	0	0	25	8	399	8	1	240	24.6	11.19	9031	426.45	8	3	0	7.94802e+08	8.90606e+08	8.39812e+08	8.62839e+08	8.94372e+08	8.91178e+08	8.91037e+08	9.82699e+08	9.44579e+08
High	High	IsMasterProteinCandidate	P63162	Small nuclear ribonucleoprotein-associated protein N OS=Homo sapiens GN=SNRPN PE=1 SV=1	0	0	25	8	399	8	1	240	24.6	11.19	9031	426.45	8	3	0	7.94802e+08	8.90606e+08	8.39812e+08	8.62839e+08	8.94372e+08	8.91178e+08	8.91037e+08	9.82699e+08	9.44579e+08
High	High	IsMasterProtein	P12955	Xaa-Pro dipeptidase OS=Homo sapiens GN=PEPD PE=1 SV=3	0	0	51	19	346	19	1	493	54.5	6	9126	425.93	19	7	0	219918125	2.185e+08	2.09872e+08	2.38867e+08	2.23368e+08	2.42579e+08	3.33935e+08	322746588	3.24188e+08	Acetyl [N-Term]
High	High	IsMasterProtein	P15531	Nucleoside diphosphate kinase A OS=Homo sapiens GN=NME1 PE=1 SV=1	0	0	70	11	423	5	1	152	17.1	6.19	9633	424.92	11	5	0	1.58165e+09	1.90255e+09	1.54343e+09	1.61662e+09	1.58311e+09	1.8611e+09	1.98211e+09	2.00741e+09	2.17029e+09
High	High	IsMasterProtein	Q92804	TATA-binding protein-associated factor 2N OS=Homo sapiens GN=TAF15 PE=1 SV=1	0	0	44	21	545	19	1	592	61.8	8.02	14465	424.57	21	11	2	1.43207e+09	1.54027e+09	1.61445e+09	1.55584e+09	1.71366e+09	1.80783e+09	1.93354e+09	2.13818e+09	1.85162e+09
High	High	IsMasterProtein	Q9UHB6	LIM domain and actin-binding protein 1 OS=Homo sapiens GN=LIMA1 PE=1 SV=1	0	0	58	39	519	39	1	759	85.2	6.84	13512	424.53	38	23	0	3.63549e+08	3.87609e+08	3.83439e+08	3.97069e+08	4.10625e+08	4.10609e+08	5.09294e+08	5.35361e+08	5.01425e+08
High	High	IsMasterProtein	P31153	S-adenosylmethionine synthase isoform type-2 OS=Homo sapiens GN=MAT2A PE=1 SV=1	0	0	62	20	390	18	1	395	43.6	6.48	9198	423.77	19	11	2	6.7022e+08	7.25723e+08	7.0618e+08	6.84134e+08	7.02409e+08	7.58833e+08	7.0383e+08	7.34899e+08	6.81856e+08
High	High	IsMasterProtein	P30566	Adenylosuccinate lyase OS=Homo sapiens GN=ADSL PE=1 SV=2	0	0	67	31	395	31	1	484	54.9	7.11	9039	423.43	30	19	0	3.27219e+08	3.32655e+08	3.39318e+08	3.63086e+08	3.74127e+08	3.61207e+08	3.58286e+08	3.40699e+08	3.29937e+08	Acetyl [N-Term]
High	High	IsMasterProtein	O00629	Importin subunit alpha-3 OS=Homo sapiens GN=KPNA4 PE=1 SV=1	0	0	48	17	298	11	1	521	57.9	4.96	6083	423.36	17	10	0	1.08515e+08	1.14043e+08	1.03806e+08	1.11386e+08	1.09243e+08	1.01279e+08	1.15598e+08	1.30654e+08	1.30461e+08
High	High	IsMasterProtein	P23368	NAD-dependent malic enzyme, mitochondrial OS=Homo sapiens GN=ME2 PE=1 SV=1	0	0	62	25	325	25	1	584	65.4	7.61	7018	423.28	24	14	0	3.44913e+08	3.3442e+08	3.2843e+08	2.83943e+08	2.77284e+08	3.02535e+08	4.46251e+08	4.42783e+08	4.48028e+08
High	High	IsMasterProtein	Q9UGP4	LIM domain-containing protein 1 OS=Homo sapiens GN=LIMD1 PE=1 SV=1	0	0	75	31	307	31	1	676	72.1	6.65	6792	422.76	29	22	0	1.03485e+08	1.05727e+08	1.02148e+08	1.19055e+08	1.24943e+08	1.28331e+08	1.3345e+08	1.4135e+08	1.31231e+08	Acetyl [N-Term]
High	High	IsMasterProtein	Q14694	Ubiquitin carboxyl-terminal hydrolase 10 OS=Homo sapiens GN=USP10 PE=1 SV=2	0	0	49	30	303	30	1	798	87.1	5.31	6580	422.7	30	16	0	2.31689e+08	2.46652e+08	2.34193e+08	2.25077e+08	2.28302e+08	2.28677e+08	2.68752e+08	2.59704e+08	2.48431e+08
High	High	IsMasterProtein	Q9UNX4	WD repeat-containing protein 3 OS=Homo sapiens GN=WDR3 PE=1 SV=1	0	0	53	40	397	40	1	943	106	6.64	8262	421.41	38	22	0	1.86079e+08	2.00358e+08	1.89479e+08	1.66098e+08	1.77143e+08	1.66948e+08	1.82064e+08	1.85383e+08	1.80967e+08
High	High	IsMasterProtein	Q2TAY7	WD40 repeat-containing protein SMU1 OS=Homo sapiens GN=SMU1 PE=1 SV=2	0	0	54	23	422	23	1	513	57.5	7.18	9301	421.38	23	10	0	4.74395e+08	5.02129e+08	4.92769e+08	4.56787e+08	4.51632e+08	5.10712e+08	5.43664e+08	5.41342e+08	5.19565e+08	Acetyl [N-Term]
High	High	IsMasterProtein	Q9NYL9	Tropomodulin-3 OS=Homo sapiens GN=TMOD3 PE=1 SV=1	0	0	59	18	343	17	1	352	39.6	5.19	7879	421.33	17	12	1	3.29752e+08	3.2966e+08	3.25237e+08	3.39996e+08	3.44613e+08	3.33695e+08	3.23948e+08	3.13602e+08	2.96724e+08
High	High	IsMasterProtein	P21359	Neurofibromin OS=Homo sapiens GN=NF1 PE=1 SV=2	0	0	28	64	444	64	1	2839	319.2	7.39	9660	421.25	60	28	0	1.27198e+08	1.36917e+08	1.29133e+08	1.04523e+08	1.06344e+08	1.07945e+08	145012582	1.49189e+08	1.42126e+08	Acetyl [N-Term]
High	High	IsMasterProtein	Q13596	Sorting nexin-1 OS=Homo sapiens GN=SNX1 PE=1 SV=3	0	0	47	23	427	21	1	522	59	5.15	12538	421.09	22	15	0	4.2684e+08	4.33407e+08	4.2217e+08	4.57723e+08	4.5065e+08	470218497	5.0494e+08	4.92855e+08	465739445	Acetyl [N-Term]
High	High	IsMasterProtein	Q92805	Golgin subfamily A member 1 OS=Homo sapiens GN=GOLGA1 PE=1 SV=3	0	0	53	34	337	34	1	767	88.1	5.27	7824	420.69	31	19	0	1.01161e+08	1.03014e+08	1.03221e+08	8.19402e+07	8.12737e+07	8.63153e+07	1.25381e+08	1.32684e+08	1.26852e+08
High	High	IsMasterProtein	P49591	Serine--tRNA ligase, cytoplasmic OS=Homo sapiens GN=SARS PE=1 SV=3	0	0	56	28	424	28	1	514	58.7	6.43	10908	420.13	27	15	0	9.20578e+08	9.98371e+08	9.15229e+08	1.11141e+09	1.18522e+09	1.22758e+09	1.19338e+09	1.2353e+09	1.10977e+09
High	High	IsMasterProtein	Q16576	Histone-binding protein RBBP7 OS=Homo sapiens GN=RBBP7 PE=1 SV=1	0	0	57	21	446	13	1	425	47.8	5.05	10968	420.13	21	9	0	3.10261e+08	3.14621e+08	2.7918e+08	2.77718e+08	2.91558e+08	2.8625e+08	2.4261e+08	2.77218e+08	2.5909e+08
High	High	IsMasterProtein	Q02878	60S ribosomal protein L6 OS=Homo sapiens GN=RPL6 PE=1 SV=3	0	0	53	22	509	22	1	288	32.7	10.58	10749	419.82	22	8	0	2.63331e+09	2.90983e+09	3.08339e+09	3.68141e+09	3.80947e+09	3.69551e+09	4.04267e+09	4.02849e+09	3.66623e+09
High	High	IsMasterProtein	Q9UQB8	Brain-specific angiogenesis inhibitor 1-associated protein 2 OS=Homo sapiens GN=BAIAP2 PE=1 SV=1	0	0	70	33	453	33	1	552	60.8	8.9	11095	419.62	33	14	0	3.23487e+08	3.47507e+08	3.36918e+08	4.093e+08	4.14624e+08	4.40194e+08	4.52918e+08	4.94699e+08	4.31022e+08
High	High	IsMasterProtein	Q9BR76	Coronin-1B OS=Homo sapiens GN=CORO1B PE=1 SV=1	0	0	40	17	332	17	1	489	54.2	5.88	7816	419.57	17	10	0	5.55744e+08	5.61616e+08	5.02278e+08	5.54899e+08	5.5091e+08	5.46475e+08	6.74369e+08	6.5191e+08	6.41905e+08
High	High	IsMasterProtein	P10768	S-formylglutathione hydrolase OS=Homo sapiens GN=ESD PE=1 SV=2	0	0	77	15	385	15	1	282	31.4	7.02	9095	419.46	15	10	0	7.21638e+08	7.43505e+08	7.02126e+08	8.15439e+08	8.34332e+08	8.6293e+08	8.99304e+08	9.45256e+08	9.17717e+08
High	High	IsMasterProtein	O94776	Metastasis-associated protein MTA2 OS=Homo sapiens GN=MTA2 PE=1 SV=1	0	0	62	39	404	35	1	668	75	9.66	8710	419.28	38	19	4	3.61869e+08	3.7558e+08	3.77542e+08	3.19374e+08	3.31791e+08	3.33767e+08	3.67542e+08	3.83166e+08	3.57294e+08
High	High	IsMasterProtein	P35908	Keratin, type II cytoskeletal 2 epidermal OS=Homo sapiens GN=KRT2 PE=1 SV=2	0	0	64	38	433	28	1	639	65.4	8	11747	418.72	37	23	6	1.3936e+08	1.52646e+08	1.51777e+08	1.75602e+08	1.96338e+08	2.00043e+08	3.94799e+08	4.17441e+08	3.67016e+08
High	High	IsMasterProtein	Q14669	E3 ubiquitin-protein ligase TRIP12 OS=Homo sapiens GN=TRIP12 PE=1 SV=1	0	0	30	46	437	46	1	1992	220.3	8.48	11328	418.1	46	21	0	7.83067e+07	7.81301e+07	7.6458e+07	8.5523e+07	8.85639e+07	7.98512e+07	9.20989e+07	1.0341e+08	9.87716e+07	Acetyl [N-Term]
High	High	IsMasterProtein	O14964	Hepatocyte growth factor-regulated tyrosine kinase substrate OS=Homo sapiens GN=HGS PE=1 SV=1	0	0	28	19	307	19	1	777	86.1	6.16	6511	417.98	19	10	0	2.22493e+08	2.29035e+08	2.30945e+08	2.17995e+08	2.43782e+08	2.34968e+08	3.00216e+08	2.88035e+08	2.84627e+08
High	High	IsMasterProtein	P17844	Probable ATP-dependent RNA helicase DDX5 OS=Homo sapiens GN=DDX5 PE=1 SV=1	0	0	62	42	649	33	1	614	69.1	8.92	14179	417.67	42	18	0	1.82856e+09	1.97372e+09	1.87617e+09	1.90155e+09	1.89069e+09	1.95235e+09	2.563e+09	2.64459e+09	2.54286e+09	Acetyl [N-Term]
High	High	IsMasterProtein	Q14165	Malectin OS=Homo sapiens GN=MLEC PE=1 SV=1	0	0	49	15	319	15	1	292	32.2	5.41	8526	415.97	15	9	0	2.01106e+08	2.25707e+08	2.20554e+08	2.21436e+08	2.40242e+08	2.42163e+08	1.7198e+08	1.79719e+08	172969276
High	High	IsMasterProtein	Q9BZE4	Nucleolar GTP-binding protein 1 OS=Homo sapiens GN=GTPBP4 PE=1 SV=3	0	0	53	36	469	36	1	634	73.9	9.5	10163	415.86	35	14	0	5.13666e+08	5.39781e+08	5.24329e+08	5.20264e+08	5.25761e+08	5.21654e+08	6.79893e+08	7.14008e+08	6.60609e+08
High	High	IsMasterProtein	Q96R06	Sperm-associated antigen 5 OS=Homo sapiens GN=SPAG5 PE=1 SV=2	0	0	51	44	361	44	1	1193	134.3	5	8030	415.81	44	26	0	1.38677e+08	1.27182e+08	1.37882e+08	1.17246e+08	1.21302e+08	1.2727e+08	9.03787e+07	9.89859e+07	9.48848e+07
High	High	IsMasterProtein	Q9BVJ6	U3 small nucleolar RNA-associated protein 14 homolog A OS=Homo sapiens GN=UTP14A PE=1 SV=1	0	0	60	39	359	39	1	771	87.9	7.87	8291	415.58	39	20	0	2.09482e+08	2.21296e+08	2.13164e+08	2.16734e+08	2.18142e+08	219854155	2.91038e+08	2.90816e+08	2.82184e+08
High	High	IsMasterProtein	Q27J81	Inverted formin-2 OS=Homo sapiens GN=INF2 PE=1 SV=2	0	0	44	41	319	40	1	1249	135.5	5.38	7170	415.57	40	25	1	1.10876e+08	1.06605e+08	1.13927e+08	1.0405e+08	1.16662e+08	1.13428e+08	1.50103e+08	1.6322e+08	1.32926e+08
High	High	IsMasterProtein	P53597	Succinate--CoA ligase [ADP/GDP-forming] subunit alpha, mitochondrial OS=Homo sapiens GN=SUCLG1 PE=1 SV=4	0	0	41	14	265	14	1	346	36.2	8.79	5546	414.5	14	8	0	2.3486e+08	2.38291e+08	2.51965e+08	2.56336e+08	2.66746e+08	2.58614e+08	3.28181e+08	3.39288e+08	3.11884e+08
High	High	IsMasterProtein	Q12756	Kinesin-like protein KIF1A OS=Homo sapiens GN=KIF1A PE=1 SV=2	0	0	44	55	457	42	1	1690	190.9	6.21	11274	414.42	52	26	13	1.71543e+08	1.77414e+08	1.74381e+08	1.75818e+08	1.82408e+08	1.80292e+08	2.38116e+08	2.40039e+08	226790622
High	High	IsMasterProtein	P54802	Alpha-N-acetylglucosaminidase OS=Homo sapiens GN=NAGLU PE=1 SV=2	0	0	40	21	292	21	1	743	82.2	6.65	6945	414.39	21	14	0	1.18722e+08	1.15813e+08	1.33196e+08	1.23123e+08	1.37162e+08	1.29845e+08	1.57552e+08	1.72716e+08	1.69263e+08
High	High	IsMasterProtein	Q9H078	Caseinolytic peptidase B protein homolog OS=Homo sapiens GN=CLPB PE=1 SV=1	0	0	41	23	366	23	1	707	78.7	9.01	8100	413.63	23	14	0	3.46478e+08	4.03402e+08	3.87359e+08	3.16904e+08	3.22093e+08	3.52226e+08	3.81649e+08	4.14452e+08	3.76449e+08
High	High	IsMasterProtein	Q14498	RNA-binding protein 39 OS=Homo sapiens GN=RBM39 PE=1 SV=2	0	0	46	21	380	18	1	530	59.3	10.1	10531	412.28	21	11	4	5.12347e+08	5.18472e+08	4.95541e+08	5.01028e+08	5.23015e+08	5.00226e+08	5.17505e+08	5.42769e+08	5.16738e+08	Acetyl [N-Term]
High	High	IsMasterProtein	Q8N0W3	L-fucose kinase OS=Homo sapiens GN=FUK PE=2 SV=2	0	0	30	22	246	22	1	1084	117.5	6.25	4488	412.16	21	16	0	6.57296e+07	6.58434e+07	6.99466e+07	7.12645e+07	7.12323e+07	74264122	9.36195e+07	9.51973e+07	1.00312e+08
High	High	IsMasterProtein	P62140	Serine/threonine-protein phosphatase PP1-beta catalytic subunit OS=Homo sapiens GN=PPP1CB PE=1 SV=3	0	0	76	22	452	9	1	327	37.2	6.19	10760	411.84	21	10	0	2.90393e+08	2.70693e+08	3.06553e+08	3.15944e+08	3.31496e+08	3.44636e+08	4.02762e+08	4.08691e+08	3.96419e+08	Acetyl [N-Term]
High	High	IsMasterProtein	Q8WYP5	Protein ELYS OS=Homo sapiens GN=AHCTF1 PE=1 SV=3	0	0	32	56	428	56	1	2266	252.3	6.6	9999	411.77	54	30	0	1.14644e+08	116526312	1.21406e+08	1.05326e+08	1.13587e+08	1.1228e+08	1.15181e+08	1.16986e+08	1.08226e+08
High	High	IsMasterProtein	Q13523	Serine/threonine-protein kinase PRP4 homolog OS=Homo sapiens GN=PRPF4B PE=1 SV=3	0	0	29	32	379	32	1	1007	116.9	10.26	8699	411.76	32	15	0	2.20849e+08	2.32538e+08	2.32807e+08	2.38924e+08	2.65887e+08	2.61421e+08	2.6829e+08	2.79952e+08	2.62434e+08	Acetyl [N-Term]
High	High	IsMasterProtein	Q14151	Scaffold attachment factor B2 OS=Homo sapiens GN=SAFB2 PE=1 SV=1	0	0	48	42	522	27	1	953	107.4	6.16	12674	411.68	42	12	0	7.22504e+07	7.50779e+07	1.17636e+08	6.69895e+07	7.4483e+07	6.96496e+07	7.11443e+07	7.31368e+07	7.28883e+07	Acetyl [N-Term]
High	High	IsMasterProtein	Q07020	60S ribosomal protein L18 OS=Homo sapiens GN=RPL18 PE=1 SV=2	0	0	51	14	392	14	1	188	21.6	11.72	10173	411.4	14	6	0	2.52967e+09	2.46524e+09	2.34838e+09	2.5153e+09	2.44703e+09	2.75474e+09	3.01308e+09	3.21932e+09	3.06889e+09
High	High	IsMasterProtein	Q15046	Lysine--tRNA ligase OS=Homo sapiens GN=KARS PE=1 SV=3	0	0	60	33	549	33	1	597	68	6.35	10937	410.7	32	20	0	1.60482e+09	1.54967e+09	1.61781e+09	1.57323e+09	1.59443e+09	1.56188e+09	1.96764e+09	2.10888e+09	1.93724e+09	Acetyl [N-Term]
High	High	IsMasterProtein	Q13616	Cullin-1 OS=Homo sapiens GN=CUL1 PE=1 SV=2	0	0	51	37	403	37	1	776	89.6	8	9964	410.69	35	17	0	2.87553e+08	2.72469e+08	2.85946e+08	3.0686e+08	2.94922e+08	3.04823e+08	3.39728e+08	3.36155e+08	3.20366e+08
High	High	IsMasterProtein	O00442	RNA 3'-terminal phosphate cyclase OS=Homo sapiens GN=RTCA PE=1 SV=1	0	0	55	17	348	17	1	366	39.3	7.85	8743	410.59	16	11	0	1.99395e+08	2.15957e+08	2.1774e+08	2.48478e+08	2.35591e+08	2.4454e+08	2.87194e+08	2.9454e+08	2.97918e+08
High	High	IsMasterProtein	P22061	Protein-L-isoaspartate(D-aspartate) O-methyltransferase OS=Homo sapiens GN=PCMT1 PE=1 SV=4	0	0	57	12	302	12	1	227	24.6	7.21	7345	410.39	12	8	0	4.08426e+08	4.08817e+08	4.13572e+08	3.94927e+08	4.08693e+08	3.96738e+08	4.49809e+08	4.75163e+08	4.48514e+08
High	High	IsMasterProtein	Q99471	Prefoldin subunit 5 OS=Homo sapiens GN=PFDN5 PE=1 SV=2	0	0	77	10	347	10	1	154	17.3	6.33	7787	409.95	10	5	0	2.76629e+08	2.83768e+08	2.7301e+08	2.76146e+08	2.87914e+08	2.72813e+08	3.34652e+08	3.51385e+08	3.2035e+08	Acetyl [N-Term]
High	High	IsMasterProtein	Q15147	1-phosphatidylinositol 4,5-bisphosphate phosphodiesterase beta-4 OS=Homo sapiens GN=PLCB4 PE=1 SV=3	0	0	55	58	473	58	1	1175	134.4	6.9	10319	409.58	55	27	0	2.34073e+08	2.50599e+08	2.4667e+08	2.942e+08	2.89778e+08	3.09726e+08	3.31889e+08	3.36009e+08	3.08246e+08
High	High	IsMasterProtein	Q9HD20	Manganese-transporting ATPase 13A1 OS=Homo sapiens GN=ATP13A1 PE=1 SV=2	0	0	47	42	422	42	1	1204	132.9	8.13	9503	409.57	42	21	0	2.32533e+08	2.39949e+08	2.3775e+08	2.54946e+08	2.41973e+08	2.62565e+08	3.35592e+08	3.35028e+08	3.21442e+08	Acetyl [N-Term]
High	High	IsMasterProtein	P25789	Proteasome subunit alpha type-4 OS=Homo sapiens GN=PSMA4 PE=1 SV=1	0	0	59	12	384	12	1	261	29.5	7.72	10762	408.9	12	5	0	1.05625e+09	9.89728e+08	1.00739e+09	1.03062e+09	1.07926e+09	1.13388e+09	1.29484e+09	1.37318e+09	1.33165e+09
High	High	IsMasterProtein	Q9UI10	Translation initiation factor eIF-2B subunit delta OS=Homo sapiens GN=EIF2B4 PE=1 SV=2	0	0	56	21	296	21	1	523	57.5	9.38	7110	408.2	20	12	0	9.40231e+07	1.07467e+08	1.02758e+08	1.14389e+08	1.29648e+08	1.20495e+08	1.30743e+08	1.31515e+08	1.28556e+08	Acetyl [N-Term]
High	High	IsMasterProtein	P51570	Galactokinase OS=Homo sapiens GN=GALK1 PE=1 SV=1	0	0	64	24	333	24	1	392	42.2	6.46	7251	407.88	24	13	0	2.6391e+08	2.97121e+08	2.81578e+08	2.96984e+08	3.14616e+08	3.11997e+08	3.23938e+08	3.49509e+08	3.32894e+08	Acetyl [N-Term]
n/a	High	None	Q9H307	Pinin OS=Homo sapiens GN=PNN PE=1 SV=4		0	27	15	102	39	1	717	81.6	7.14		407.69		15	0	5.84194e+08	6.09128e+08	6.08719e+08	5.83374e+08	5.81847e+08	6.30816e+08	6.67251e+08	6.50876e+08	6.58216e+08
High	High	IsMasterProtein	P51114	Fragile X mental retardation syndrome-related protein 1 OS=Homo sapiens GN=FXR1 PE=1 SV=3	0	0	51	34	385	31	1	621	69.7	6.15	10202	407.54	33	16	0	3.52099e+08	3.83714e+08	364443832	3.30982e+08	3.25946e+08	3.34651e+08	3.68452e+08	3.41578e+08	3.34817e+08
High	High	IsMasterProtein	Q9P265	Disco-interacting protein 2 homolog B OS=Homo sapiens GN=DIP2B PE=1 SV=3	0	0	43	49	389	45	1	1576	171.4	8.09	9392	407.24	47	28	4	1.40655e+08	1.42101e+08	1.42555e+08	1.55036e+08	1.57684e+08	1.53319e+08	2.00106e+08	2.01184e+08	1.96101e+08
High	High	IsMasterProtein	P23634	Plasma membrane calcium-transporting ATPase 4 OS=Homo sapiens GN=ATP2B4 PE=1 SV=2	0	0	30	30	316	15	1	1241	137.8	6.6	7807	406.38	30	15	2	3.41018e+07	3.98276e+07	3.45347e+07	4.06222e+07	3.93043e+07	4.29022e+07	5.46047e+07	5.15666e+07	5.54554e+07
High	High	IsMasterProtein	Q9Y5K6	CD2-associated protein OS=Homo sapiens GN=CD2AP PE=1 SV=1	0	0	77	49	529	49	1	639	71.4	6.4	12183	406.18	47	21	0	5.74432e+08	6.03148e+08	5.79379e+08	5.97752e+08	6.66354e+08	6.49626e+08	7.86916e+08	8.47198e+08	7.96804e+08	Acetyl [N-Term]
High	High	IsMasterProtein	P62987	Ubiquitin-60S ribosomal protein L40 OS=Homo sapiens GN=UBA52 PE=1 SV=2	0	0	46	6	789	1	1	128	14.7	9.83	18326	406.13	6	3	0	1.56672e+07	3.44637e+07	1.57985e+07	3.64759e+07	1.28144e+07	3.46152e+07	4.21815e+07	3.98432e+07	4.46512e+07
High	High	IsMasterProteinCandidate	P0CG48	Polyubiquitin-C OS=Homo sapiens GN=UBC PE=1 SV=3	0	0	74	6	769	1	1	685	77	7.66	17712	406.13	6	3	0	609343		692779	822128	1.65859e+06	1.00619e+06	1.94469e+06	1.54575e+06	1.07237e+06
High	High	IsMasterProtein	P0CG47	Polyubiquitin-B OS=Homo sapiens GN=UBB PE=1 SV=1	0	0	71	6	769	1	1	229	25.7	7.43	17712	406.13	6	3	0	609343		692779	822128	1.65859e+06	1.00619e+06	1.94469e+06	1.54575e+06	1.07237e+06
High	High	IsMasterProtein	Q96AY3	Peptidyl-prolyl cis-trans isomerase FKBP10 OS=Homo sapiens GN=FKBP10 PE=1 SV=1	0	0	51	28	481	27	1	582	64.2	5.62	11629	406.04	28	12	1	5.90157e+08	5.86619e+08	6.19396e+08	5.48176e+08	5.64582e+08	6.15275e+08	7.65312e+08	7.84549e+08	7.70104e+08
High	High	IsMasterProtein	Q14573	Inositol 1,4,5-trisphosphate receptor type 3 OS=Homo sapiens GN=ITPR3 PE=1 SV=2	0	0	30	60	436	52	1	2671	303.9	6.48	10571	405.34	59	23	8	1.11331e+08	1.1452e+08	1.08957e+08	1.14268e+08	1.16174e+08	1.20988e+08	1.2917e+08	1.34747e+08	1.28286e+08
High	High	IsMasterProtein	Q96C36	Pyrroline-5-carboxylate reductase 2 OS=Homo sapiens GN=PYCR2 PE=1 SV=1	0	0	65	18	427	17	1	320	33.6	7.77	11335	404.72	18	13	0	1.70949e+08	1.82415e+08	1.79962e+08	1.78595e+08	1.8231e+08	1.84687e+08	2.36296e+08	2.19248e+08	2.14951e+08	Acetyl [N-Term]
High	High	IsMasterProtein	Q9H583	HEAT repeat-containing protein 1 OS=Homo sapiens GN=HEATR1 PE=1 SV=3	0	0	34	66	536	66	1	2144	242.2	6.54	12107	404.68	64	29	0	2.96018e+08	3.06989e+08	3.14844e+08	2.60281e+08	2.6742e+08	2.80108e+08	2.91011e+08	3.20325e+08	2.98743e+08
High	High	IsMasterProtein	Q58FF8	Putative heat shock protein HSP 90-beta 2 OS=Homo sapiens GN=HSP90AB2P PE=1 SV=2	0	0	25	12	469	1	1	381	44.3	4.84	12144	404.58	11	6	0	17072492	20714498	20987274	16410668	16560993	15716706	19978142	18321376	14661934
High	High	IsMasterProtein	Q13823	Nucleolar GTP-binding protein 2 OS=Homo sapiens GN=GNL2 PE=1 SV=1	0	0	45	32	432	32	1	731	83.6	9.25	10119	404.58	32	15	0	2.91877e+08	3.0204e+08	3.01726e+08	2.75436e+08	2.80876e+08	3.05321e+08	3.58871e+08	3.96051e+08	3.75878e+08
n/a	High	None	O43847	Nardilysin OS=Homo sapiens GN=NRDC PE=1 SV=2		0	21	19	108	44	1	1150	131.5	5		404.31		19	0	3.21396e+08	3.33844e+08	3.28716e+08	3.25296e+08	3.41339e+08	3.46829e+08	4.61572e+08	4.82517e+08	4.75965e+08
High	High	IsMasterProtein	P11498	Pyruvate carboxylase, mitochondrial OS=Homo sapiens GN=PC PE=1 SV=2	0	0	50	44	419	44	1	1178	129.6	6.84	9590	403.95	44	21	0	2.60897e+08	2.71032e+08	2.6658e+08	2.69468e+08	2.58046e+08	2.68602e+08	3.71738e+08	3.85963e+08	3.68681e+08
High	High	IsMasterProtein	Q9NQW7	Xaa-Pro aminopeptidase 1 OS=Homo sapiens GN=XPNPEP1 PE=1 SV=3	0	0	65	30	385	29	1	623	69.9	5.67	7401	403.71	29	15	1	5.00961e+08	5.2642e+08	5.33657e+08	5.55143e+08	5.86877e+08	5.82859e+08	6.91588e+08	6.65981e+08	6.13047e+08
High	High	IsMasterProtein	P36507	Dual specificity mitogen-activated protein kinase kinase 2 OS=Homo sapiens GN=MAP2K2 PE=1 SV=1	0	0	59	25	343	17	1	400	44.4	6.55	8574	403.21	25	12	9	3.69115e+08	3.58082e+08	3.77997e+08	4.22274e+08	4.6787e+08	4.63625e+08	4.34402e+08	4.27807e+08	4.00919e+08
High	High	IsMasterProtein	P54819	Adenylate kinase 2, mitochondrial OS=Homo sapiens GN=AK2 PE=1 SV=2	0	0	75	18	474	18	1	239	26.5	7.81	11031	402.5	18	8	0	7.21737e+08	6.91548e+08	6.86947e+08	7.84179e+08	7.92264e+08	7.52009e+08	8.70215e+08	8.71565e+08	7.91992e+08
High	High	IsMasterProtein	O43818	U3 small nucleolar RNA-interacting protein 2 OS=Homo sapiens GN=RRP9 PE=1 SV=1	0	0	48	23	292	23	1	475	51.8	7.85	7310	402.07	23	8	0	1.98131e+08	2.11937e+08	2.14412e+08	2.216e+08	2.30691e+08	2.39052e+08	2.852e+08	287397671	2.58021e+08
High	High	IsMasterProtein	Q5SRE5	Nucleoporin NUP188 homolog OS=Homo sapiens GN=NUP188 PE=1 SV=1	0	0	35	50	374	50	1	1749	195.9	6.73	7232	401.64	48	25	0	1.80353e+08	1.55828e+08	1.78068e+08	1.33921e+08	1.39432e+08	1.34798e+08	1.46093e+08	1.50551e+08	1.51089e+08	Acetyl [N-Term]
High	High	IsMasterProtein	P23786	Carnitine O-palmitoyltransferase 2, mitochondrial OS=Homo sapiens GN=CPT2 PE=1 SV=2	0	0	56	32	476	32	1	658	73.7	8.18	11274	401.45	32	17	0	4.28672e+08	4.52028e+08	4.54144e+08	3.98183e+08	4.3079e+08	4.16571e+08	6.25151e+08	6.36935e+08	6.09958e+08
High	High	IsMasterProtein	Q86UK7	E3 ubiquitin-protein ligase ZNF598 OS=Homo sapiens GN=ZNF598 PE=1 SV=1	0	0	69	45	381	45	1	904	98.6	8.4	8936	401.38	45	22	0	1.64024e+08	1.69073e+08	1.71481e+08	1.83022e+08	1.87853e+08	1.92927e+08	1.14929e+08	1.17813e+08	1.1559e+08	Acetyl [N-Term]
High	High	IsMasterProtein	Q13136	Liprin-alpha-1 OS=Homo sapiens GN=PPFIA1 PE=1 SV=1	0	0	42	45	428	31	1	1202	135.7	6.29	10601	401.26	44	22	15	1.63703e+08	1.77139e+08	1.66956e+08	170222852	1.64832e+08	1.79967e+08	1.90438e+08	1.99766e+08	1.89712e+08
High	High	IsMasterProtein	Q9BUJ2	Heterogeneous nuclear ribonucleoprotein U-like protein 1 OS=Homo sapiens GN=HNRNPUL1 PE=1 SV=2	0	0	41	31	374	30	1	856	95.7	6.92	8580	400.94	31	15	0	4.12309e+08	4.14902e+08	4.20999e+08	4.33054e+08	4.45909e+08	4.37465e+08	5.10596e+08	5.34317e+08	5.31297e+08
High	High	IsMasterProtein	Q8TD30	Alanine aminotransferase 2 OS=Homo sapiens GN=GPT2 PE=1 SV=1	0	0	60	22	292	22	1	523	57.9	7.71	6688	400.56	22	14	0	7.12791e+07	7.23794e+07	7.06243e+07	7.80601e+07	7.96876e+07	8.52005e+07	8.7902e+07	9.08597e+07	8.62488e+07
High	High	IsMasterProtein	A6NKD9	Coiled-coil domain-containing protein 85C OS=Homo sapiens GN=CCDC85C PE=1 SV=1	0	0	54	18	266	18	1	419	45.2	6.96	6710	400.18	17	9	0	7.35213e+07	7.21914e+07	6.98249e+07	7.11593e+07	8.02744e+07	8.25165e+07	9.59975e+07	1.01711e+08	8.93385e+07
High	High	IsMasterProtein	P07288	Prostate-specific antigen OS=Homo sapiens GN=KLK3 PE=1 SV=2	0	0	77	11	285	10	1	261	28.7	7.68	5397	399.92	10	9	1	6.11898e+08	6.07656e+08	5.92988e+08	7.40596e+08	7.92316e+08	7.69515e+08	7.18064e+08	7.17964e+08	7.3087e+08
High	High	IsMasterProtein	Q13033	Striatin-3 OS=Homo sapiens GN=STRN3 PE=1 SV=3	0	0	37	22	281	19	1	797	87.2	5.36	6443	399.46	22	16	3	1.63766e+08	1.64578e+08	1.70529e+08	1.7321e+08	1.77578e+08	1.8394e+08	1.79168e+08	1.81049e+08	1.7573e+08	Acetyl [N-Term]
High	High	IsMasterProtein	P48163	NADP-dependent malic enzyme OS=Homo sapiens GN=ME1 PE=1 SV=1	0	0	56	28	395	28	1	572	64.1	6.13	7949	398.23	28	12	0	4.33927e+08	4.67002e+08	4.78953e+08	5.27575e+08	5.40007e+08	5.58197e+08	6.5334e+08	7.07287e+08	6.65715e+08	Acetyl [N-Term]
High	High	None	Q8NEV1	Casein kinase II subunit alpha 3 OS=Homo sapiens GN=CSNK2A3 PE=1 SV=2	0	0	54	20	346	18	1	391	45.2	8.5	6657	398.03	20	13	0	4.9534e+08	4.92318e+08	4.67975e+08	4.41468e+08	4.56253e+08	4.6698e+08	5.47365e+08	5.90749e+08	5.09156e+08
High	High	IsMasterProtein	O60232	Sjoegren syndrome/scleroderma autoantigen 1 OS=Homo sapiens GN=SSSCA1 PE=1 SV=1	0	0	70	10	271	10	1	199	21.5	5.24	6223	397.91	10	7	0	9.38836e+07	9.54359e+07	9.41041e+07	9.39859e+07	9.48245e+07	9.87876e+07	1.2562e+08	1.28417e+08	1.30113e+08	Acetyl [N-Term]
High	High	IsMasterProtein	O15511	Actin-related protein 2/3 complex subunit 5 OS=Homo sapiens GN=ARPC5 PE=1 SV=3	0	0	58	8	265	7	1	151	16.3	5.67	6579	397.85	8	6	0	1.39825e+08	1.47093e+08	1.46518e+08	1.17343e+08	1.14611e+08	1.27052e+08	7.23105e+07	7.49798e+07	7.06191e+07
High	High	IsMasterProtein	P36871	Phosphoglucomutase-1 OS=Homo sapiens GN=PGM1 PE=1 SV=3	0	0	64	32	422	32	1	562	61.4	6.76	8929	397.43	31	15	0	3.38734e+08	3.48915e+08	3.57049e+08	4.20581e+08	4.24217e+08	4.33872e+08	5.20639e+08	5.23875e+08	4.92887e+08
High	High	IsMasterProtein	Q9UBE0	SUMO-activating enzyme subunit 1 OS=Homo sapiens GN=SAE1 PE=1 SV=1	0	0	64	16	318	16	1	346	38.4	5.3	7397	397.07	16	7	0	2.74375e+08	2.9146e+08	2.699e+08	2.58473e+08	2.5984e+08	2.82727e+08	2.35087e+08	2.53376e+08	2.32655e+08
High	High	IsMasterProtein	Q9UJU6	Drebrin-like protein OS=Homo sapiens GN=DBNL PE=1 SV=1	0	0	55	23	425	23	1	430	48.2	5.05	10070	397.06	23	12	0	5.09516e+08	5.47548e+08	5.16592e+08	5.65896e+08	5.80165e+08	568914428	5.96803e+08	5.81963e+08	5.93179e+08
High	High	IsMasterProtein	Q9Y4F5	Centrosomal protein of 170 kDa protein B OS=Homo sapiens GN=CEP170B PE=1 SV=4	0	0	48	49	352	48	1	1589	171.6	6.84	8352	397.01	49	27	1	6.70745e+07	6.67717e+07	6.61639e+07	6.80686e+07	6.67079e+07	7.27584e+07	8.69926e+07	8.62115e+07	8.17882e+07
High	High	IsMasterProtein	Q92878	DNA repair protein RAD50 OS=Homo sapiens GN=RAD50 PE=1 SV=1	0	0	52	70	557	70	1	1312	153.8	6.89	12884	396.64	69	25	0	4.38009e+08	4.57916e+08	4.52095e+08	4.68816e+08	4.67647e+08	4.94728e+08	5.45649e+08	5.47139e+08	5.37663e+08
High	High	IsMasterProtein	P53041	Serine/threonine-protein phosphatase 5 OS=Homo sapiens GN=PPP5C PE=1 SV=1	0	0	62	31	427	31	1	499	56.8	6.28	10242	396.32	29	15	0	2.57919e+08	2.72058e+08	2.83923e+08	2.71315e+08	3.08483e+08	3.05876e+08	3.66796e+08	3.83125e+08	3.24673e+08	Acetyl [N-Term]
High	High	IsMasterProtein	Q9UBV2	Protein sel-1 homolog 1 OS=Homo sapiens GN=SEL1L PE=1 SV=3	0	0	46	25	304	25	1	794	88.7	5.39	5861	396.3	23	12	0	6.06241e+07	5.97866e+07	5.88754e+07	6.51998e+07	6.58942e+07	6.29796e+07	8.29912e+07	8.59968e+07	7.66783e+07
High	High	IsMasterProtein	Q9H9B4	Sideroflexin-1 OS=Homo sapiens GN=SFXN1 PE=1 SV=4	0	0	50	15	357	13	1	322	35.6	9.07	7698	396.24	15	7	2	5.83481e+08	6.3657e+08	6.10096e+08	5.091e+08	5.38864e+08	5.45941e+08	6.28924e+08	6.38858e+08	5.57984e+08
High	High	IsMasterProtein	Q9H4A3	Serine/threonine-protein kinase WNK1 OS=Homo sapiens GN=WNK1 PE=1 SV=2	0	0	22	40	342	36	1	2382	250.6	6.34	7674	395.87	40	19	5	1.34752e+08	1.51321e+08	1.46495e+08	1.43609e+08	1.30646e+08	1.51014e+08	1.92138e+08	1.9193e+08	1.94894e+08
High	High	IsMasterProtein	O43149	Zinc finger ZZ-type and EF-hand domain-containing protein 1 OS=Homo sapiens GN=ZZEF1 PE=1 SV=6	0	0	30	71	424	71	1	2961	330.9	5.95	9260	395.18	66	28	0	9.28048e+07	9.8522e+07	1.01728e+08	1.05187e+08	1.11938e+08	1.07014e+08	1.53923e+08	1.49041e+08	1.46778e+08
High	High	IsMasterProtein	Q92688	Acidic leucine-rich nuclear phosphoprotein 32 family member B OS=Homo sapiens GN=ANP32B PE=1 SV=1	0	0	39	11	296	7	1	251	28.8	4.06	6628	395.08	11	4	0	8.88278e+08	9.48417e+08	1.05649e+09	1.11189e+09	1.05291e+09	1.16405e+09	1.18128e+09	1.38946e+09	1.19919e+09
High	High	IsMasterProtein	Q9Y4W6	AFG3-like protein 2 OS=Homo sapiens GN=AFG3L2 PE=1 SV=2	0	0	55	40	444	40	1	797	88.5	8.66	8944	395.03	38	17	0	4.88721e+08	5.09912e+08	5.10272e+08	4.70333e+08	5.03372e+08	5.02806e+08	6.00726e+08	6.07219e+08	6.23417e+08
High	High	IsMasterProtein	Q8TAT6	Nuclear protein localization protein 4 homolog OS=Homo sapiens GN=NPLOC4 PE=1 SV=3	0	0	60	29	366	29	1	608	68.1	6.38	7977	394.8	29	17	0	4.31923e+08	4.57674e+08	4.2366e+08	4.03467e+08	4.06262e+08	4.3757e+08	5.42108e+08	5.59202e+08	5.24197e+08	Acetyl [N-Term]
High	High	IsMasterProtein	Q14746	Conserved oligomeric Golgi complex subunit 2 OS=Homo sapiens GN=COG2 PE=1 SV=1	0	0	62	37	391	37	1	738	83.2	6.62	9496	394.62	36	21	0	2.97187e+08	3.34825e+08	3.83955e+08	2.65051e+08	3.00733e+08	3.72483e+08	2.82319e+08	2.8994e+08	2.90565e+08
High	High	IsMasterProtein	P48047	ATP synthase subunit O, mitochondrial OS=Homo sapiens GN=ATP5O PE=1 SV=1	0	0	63	11	307	11	1	213	23.3	9.96	7212	394.42	11	8	0	5.87429e+08	6.19898e+08	6.38188e+08	6.88216e+08	7.28313e+08	7.3613e+08	8.82107e+08	9.35045e+08	8.58035e+08
High	High	IsMasterProtein	Q04323	UBX domain-containing protein 1 OS=Homo sapiens GN=UBXN1 PE=1 SV=2	0	0	67	26	314	26	1	297	33.3	5.25	7880	394.41	26	12	0	2.13314e+08	2.452e+08	2.10553e+08	2.24374e+08	2.438e+08	2.40458e+08	2.49267e+08	2.46062e+08	2.30685e+08	Acetyl [N-Term]
High	High	IsMasterProtein	P08621	U1 small nuclear ribonucleoprotein 70 kDa OS=Homo sapiens GN=SNRNP70 PE=1 SV=2	0	0	51	22	461	22	1	437	51.5	9.94	9188	393.84	22	9	0	7.43051e+08	8.06552e+08	8.18701e+08	8.52796e+08	9.27962e+08	8.13273e+08	8.4356e+08	8.11524e+08	8.41551e+08	Acetyl [N-Term]
High	High	IsMasterProtein	Q99961	Endophilin-A2 OS=Homo sapiens GN=SH3GL1 PE=1 SV=1	0	0	56	17	343	17	1	368	41.5	5.43	7906	393.72	17	7	0	3.72081e+08	3.78324e+08	3.76569e+08	4.11346e+08	3.93769e+08	4.27343e+08	5.41001e+08	5.50948e+08	5.41065e+08
High	High	IsMasterProtein	P61160	Actin-related protein 2 OS=Homo sapiens GN=ACTR2 PE=1 SV=1	0	0	53	20	400	20	1	394	44.7	6.74	9466	393.66	20	11	0	5.75489e+08	5.7471e+08	5.99873e+08	5.7307e+08	606990684	6.12947e+08	6.90027e+08	7.33058e+08	7.32252e+08	Acetyl [N-Term]
High	High	IsMasterProtein	Q8IZH2	5'-3' exoribonuclease 1 OS=Homo sapiens GN=XRN1 PE=1 SV=1	0	0	38	50	377	50	1	1706	194	7.21	8255	393.26	48	26	0	1.68003e+08	1.6887e+08	1.59708e+08	1.64678e+08	1.63155e+08	1.73588e+08	1.45411e+08	1.50826e+08	1.41399e+08
High	High	IsMasterProtein	Q14966	Zinc finger protein 638 OS=Homo sapiens GN=ZNF638 PE=1 SV=2	0	0	35	59	417	59	1	1978	220.5	6.38	9236	393.22	55	28	0	1.38206e+08	1.46985e+08	1.49555e+08	1.54803e+08	1.62856e+08	1.57902e+08	1.45128e+08	1.45672e+08	1.38564e+08
High	High	IsMasterProtein	P06493	Cyclin-dependent kinase 1 OS=Homo sapiens GN=CDK1 PE=1 SV=3	0	0	72	22	371	20	1	297	34.1	8.4	7331	393.2	22	16	1	9.8723e+08	9.37401e+08	1.00681e+09	9.65583e+08	1.05346e+09	9.90214e+08	8.94009e+08	9.49509e+08	9.5112e+08
High	High	IsMasterProtein	O95155	Ubiquitin conjugation factor E4 B OS=Homo sapiens GN=UBE4B PE=1 SV=1	0	0	41	39	323	39	1	1302	146.1	6.55	6887	393.11	36	21	0	1.1291e+08	1.1649e+08	1.19565e+08	1.22026e+08	1.22199e+08	1.33257e+08	1.3349e+08	1.42334e+08	1.3985e+08	Acetyl [N-Term]
High	High	IsMasterProtein	Q2NL82	Pre-rRNA-processing protein TSR1 homolog OS=Homo sapiens GN=TSR1 PE=1 SV=1	0	0	46	32	397	32	1	804	91.8	7.42	8435	392.96	32	19	0	2.50477e+08	3.16925e+08	2.65954e+08	2.84723e+08	2.71013e+08	3.17839e+08	3.11151e+08	3.53733e+08	3.09454e+08
High	High	IsMasterProtein	Q13148	TAR DNA-binding protein 43 OS=Homo sapiens GN=TARDBP PE=1 SV=1	0	0	47	14	337	14	1	414	44.7	6.19	8822	392.8	14	8	0	6.49546e+08	6.94866e+08	7.01724e+08	7.03034e+08	6.5919e+08	7.05751e+08	8.34057e+08	8.53829e+08	8.51657e+08
High	High	IsMasterProtein	Q9UEW8	STE20/SPS1-related proline-alanine-rich protein kinase OS=Homo sapiens GN=STK39 PE=1 SV=3	0	0	53	21	369	16	1	545	59.4	6.29	8049	392.19	21	12	8	5.19457e+08	5.46603e+08	5.56042e+08	5.21936e+08	4.9224e+08	5.03259e+08	5.44787e+08	5.69485e+08	5.35868e+08
High	High	IsMasterProtein	Q96EP5	DAZ-associated protein 1 OS=Homo sapiens GN=DAZAP1 PE=1 SV=1	0	0	37	14	294	14	1	407	43.4	8.56	6932	392	13	9	0	4.66845e+08	4.54008e+08	4.71461e+08	4.80293e+08	5.14328e+08	5.18251e+08	5.50554e+08	5.51391e+08	5.25671e+08	Acetyl [N-Term]
High	High	IsMasterProtein	O60361	Putative nucleoside diphosphate kinase OS=Homo sapiens GN=NME2P1 PE=5 SV=1	0	0	66	9	345	1	1	137	15.5	8.57	7820	391.98	9	3	0
High	High	IsMasterProtein	P62266	40S ribosomal protein S23 OS=Homo sapiens GN=RPS23 PE=1 SV=3	0	0	42	7	254	7	1	143	15.8	10.49	5143	391.84	7	5	0	1.18456e+09	1.27514e+09	1.13102e+09	1.12784e+09	1.10407e+09	1.27731e+09	1.46234e+09	1.75238e+09	1.44037e+09
High	High	IsMasterProtein	Q9Y394	Dehydrogenase/reductase SDR family member 7 OS=Homo sapiens GN=DHRS7 PE=1 SV=1	0	0	47	13	367	13	1	339	38.3	8.32	9439	391.35	13	8	0	8.55718e+08	8.16765e+08	7.91309e+08	8.41e+08	8.20659e+08	8.35211e+08	2.57139e+08	2.47993e+08	2.45585e+08
High	High	IsMasterProtein	Q9NP61	ADP-ribosylation factor GTPase-activating protein 3 OS=Homo sapiens GN=ARFGAP3 PE=1 SV=1	0	0	59	27	341	27	1	516	56.9	7.36	7959	391.1	27	14	0	2.0293e+08	2.13608e+08	2.06373e+08	2.35404e+08	2.47902e+08	2.53183e+08	2.63473e+08	2.73787e+08	2.62363e+08
High	High	IsMasterProtein	Q9NQC3	Reticulon-4 OS=Homo sapiens GN=RTN4 PE=1 SV=2	0	0	20	14	221	14	1	1192	129.9	4.5	5078	391.06	14	11	0	1.75379e+08	1.75941e+08	1.72903e+08	1.81711e+08	1.86008e+08	1.95402e+08	2.05906e+08	2.17568e+08	2.11962e+08	Acetyl [N-Term]
High	High	IsMasterProtein	Q12907	Vesicular integral-membrane protein VIP36 OS=Homo sapiens GN=LMAN2 PE=1 SV=1	0	0	60	18	307	18	1	356	40.2	6.95	6506	390.86	18	10	0	7.05538e+08	7.03257e+08	7.28458e+08	5.83761e+08	5.93449e+08	5.98431e+08	6.8632e+08	7.32515e+08	6.71963e+08
High	High	IsMasterProtein	P62158	Calmodulin OS=Homo sapiens GN=CALM1 PE=1 SV=2	0	0	96	14	611	13	1	149	16.8	4.22	14026	390.68	14	4	2	4.12294e+09	4.49485e+09	4.19596e+09	4.16702e+09	4.0113e+09	4.37173e+09	4.42617e+09	4.45826e+09	4.50586e+09	Acetyl [N-Term]
High	High	IsMasterProtein	Q9Y4W2	Ribosomal biogenesis protein LAS1L OS=Homo sapiens GN=LAS1L PE=1 SV=2	0	0	54	30	327	30	1	734	83	4.73	7924	390.15	30	19	0	1.53575e+08	1.52501e+08	1.57395e+08	1.46649e+08	1.54466e+08	1.60197e+08	1.62715e+08	1.66489e+08	1.57047e+08
High	High	IsMasterProtein	O95232	Luc7-like protein 3 OS=Homo sapiens GN=LUC7L3 PE=1 SV=2	0	0	45	20	373	19	1	432	51.4	9.79	10141	390.06	20	9	0	3.19778e+08	3.09141e+08	2.96347e+08	3.14662e+08	2.95495e+08	3.30846e+08	3.37975e+08	3.40603e+08	3.37871e+08	Acetyl [N-Term]
High	High	IsMasterProtein	Q49AR2	UPF0489 protein C5orf22 OS=Homo sapiens GN=C5orf22 PE=1 SV=2	0	0	54	14	237	14	1	442	49.9	4.78	6242	389.89	13	9	0	1.06374e+08	1.09866e+08	1.11899e+08	1.13107e+08	1.20841e+08	1.18227e+08	1.18577e+08	1.21582e+08	1.1844e+08
High	High	IsMasterProtein	O75116	Rho-associated protein kinase 2 OS=Homo sapiens GN=ROCK2 PE=1 SV=4	0	0	41	52	376	47	1	1388	160.8	6.02	7641	389.41	51	24	0	1.18229e+08	1.22793e+08	1.15245e+08	1.1389e+08	1.21395e+08	1.25539e+08	1.38852e+08	1.43153e+08	1.3736e+08	Acetyl [N-Term]
High	High	IsMasterProtein	O43684	Mitotic checkpoint protein BUB3 OS=Homo sapiens GN=BUB3 PE=1 SV=1	0	0	69	19	366	19	1	328	37.1	6.84	8986	389.24	19	8	0	7.56073e+08	8.08591e+08	7.7729e+08	7.61819e+08	8.61679e+08	8.17759e+08	8.92286e+08	9.20723e+08	8.15e+08	Acetyl [N-Term]
High	High	IsMasterProtein	Q99590	Protein SCAF11 OS=Homo sapiens GN=SCAF11 PE=1 SV=2	0	0	35	34	373	34	1	1463	164.6	8.41	9442	388.76	34	22	0	1.19762e+08	1.28465e+08	1.20987e+08	1.24569e+08	1.35113e+08	1.3249e+08	1.51094e+08	1.5148e+08	1.46364e+08
High	High	IsMasterProtein	O60749	Sorting nexin-2 OS=Homo sapiens GN=SNX2 PE=1 SV=2	0	0	46	23	392	21	1	519	58.4	5.12	10800	388.22	23	17	2	5.19639e+08	5.38666e+08	5.17747e+08	5.04353e+08	5.1825e+08	5.42348e+08	5.33333e+08	5.58367e+08	5.34703e+08
High	High	IsMasterProtein	Q07866	Kinesin light chain 1 OS=Homo sapiens GN=KLC1 PE=1 SV=2	0	0	65	38	478	28	1	573	65.3	6.2	11673	388.02	38	18	11	5.24705e+08	5.39653e+08	5.50059e+08	5.75065e+08	6.27954e+08	6.1528e+08	7.44743e+08	7.23599e+08	6.97664e+08
High	High	IsMasterProtein	Q9Y5S9	RNA-binding protein 8A OS=Homo sapiens GN=RBM8A PE=1 SV=1	0	0	78	11	434	11	1	174	19.9	5.72	14079	387.77	11	4	0	5.67431e+08	6.00986e+08	5.54605e+08	4.78199e+08	4.71789e+08	4.84919e+08	5.09569e+08	5.44331e+08	5.14297e+08	Acetyl [N-Term]
High	High	IsMasterProtein	Q99733	Nucleosome assembly protein 1-like 4 OS=Homo sapiens GN=NAP1L4 PE=1 SV=1	0	0	48	16	342	14	1	375	42.8	4.69	8564	387.06	16	9	0	5.13894e+08	4.93499e+08	5.36655e+08	6.04425e+08	5.55763e+08	5.29771e+08	5.86269e+08	6.03652e+08	6.13287e+08	Acetyl [N-Term]
High	High	IsMasterProtein	Q15386	Ubiquitin-protein ligase E3C OS=Homo sapiens GN=UBE3C PE=1 SV=3	0	0	45	42	390	42	1	1083	123.8	6.71	8487	386.25	42	21	0	2.11504e+08	2.07031e+08	2.12672e+08	2.00123e+08	2.19919e+08	2.12082e+08	2.73603e+08	2.91567e+08	2.8327e+08	Acetyl [N-Term]
High	High	IsMasterProtein	P09525	Annexin A4 OS=Homo sapiens GN=ANXA4 PE=1 SV=4	0	0	64	24	398	23	1	319	35.9	6.13	11001	385.89	23	12	0	5.14191e+08	5.52108e+08	5.4491e+08	5.10806e+08	511169113	5.51619e+08	6.34956e+08	6.10205e+08	6.13493e+08
High	High	IsMasterProtein	Q01581	Hydroxymethylglutaryl-CoA synthase, cytoplasmic OS=Homo sapiens GN=HMGCS1 PE=1 SV=2	0	0	50	20	322	19	1	520	57.3	5.41	7422	385.75	19	13	1	1.74764e+08	1.85791e+08	1.73552e+08	1.65966e+08	1.6778e+08	1.74661e+08	2.64628e+08	2.56491e+08	2.29714e+08
High	High	IsMasterProtein	Q92620	Pre-mRNA-splicing factor ATP-dependent RNA helicase PRP16 OS=Homo sapiens GN=DHX38 PE=1 SV=2	0	0	39	45	439	44	1	1227	140.4	6.54	11179	385.63	44	22	2	1.44023e+08	1.54871e+08	1.48854e+08	1.46666e+08	1.53892e+08	1.57018e+08	1.74207e+08	1.92981e+08	1.76997e+08	Acetyl [N-Term]
High	High	IsMasterProtein	Q9UIA9	Exportin-7 OS=Homo sapiens GN=XPO7 PE=1 SV=3	0	0	53	49	506	48	1	1087	123.8	6.32	12809	385.59	48	21	1	4.30716e+08	4.51106e+08	4.38061e+08	4.2146e+08	3.89222e+08	4.0684e+08	4.64917e+08	4.80605e+08	4.39737e+08	Acetyl [N-Term]
High	High	IsMasterProtein	P23193	Transcription elongation factor A protein 1 OS=Homo sapiens GN=TCEA1 PE=1 SV=2	0	0	64	20	450	18	1	301	33.9	8.38	12283	385.53	20	12	2	5.46459e+08	5.56168e+08	5.60732e+08	5.41437e+08	5.19037e+08	5.60286e+08	4.09871e+08	4.24337e+08	4.03097e+08	Acetyl [N-Term]
High	High	IsMasterProtein	P12236	ADP/ATP translocase 3 OS=Homo sapiens GN=SLC25A6 PE=1 SV=4	0	0	68	25	683	6	1	298	32.8	9.74	13309	385.02	25	8	7	5.82831e+08	6.15403e+08	6.15324e+08	7.25173e+08	7.87214e+08	8.47875e+08	1.01829e+09	1.19466e+09	1.0431e+09	Acetyl [N-Term; N-Term]
High	High	IsMasterProtein	Q9H3S7	Tyrosine-protein phosphatase non-receptor type 23 OS=Homo sapiens GN=PTPN23 PE=1 SV=1	0	0	34	43	372	43	1	1636	178.9	6.92	7959	384.95	42	18	0	1.63287e+08	1.751e+08	1.72843e+08	1.82102e+08	1.73484e+08	1.92693e+08	2.19486e+08	2.21345e+08	2.06891e+08
High	High	IsMasterProtein	P31937	3-hydroxyisobutyrate dehydrogenase, mitochondrial OS=Homo sapiens GN=HIBADH PE=1 SV=2	0	0	54	11	241	11	1	336	35.3	8.13	4946	384.28	11	9	0	1.60081e+08	1.72256e+08	1.56355e+08	1.62343e+08	1.78717e+08	1.71013e+08	2.0155e+08	2.31574e+08	2.03961e+08
High	High	IsMasterProtein	Q9BS26	Endoplasmic reticulum resident protein 44 OS=Homo sapiens GN=ERP44 PE=1 SV=1	0	0	48	17	294	16	1	406	46.9	5.26	6284	384.13	17	12	0	3.59971e+08	3.78066e+08	4.16462e+08	2.88651e+08	3.07936e+08	3.3741e+08	4.70536e+08	5.2286e+08	4.84534e+08
High	High	IsMasterProtein	P11388	DNA topoisomerase 2-alpha OS=Homo sapiens GN=TOP2A PE=1 SV=3	0	0	34	48	445	34	1	1531	174.3	8.72	9901	384.1	46	19	0	1.14813e+08	1.19607e+08	1.19963e+08	1.39175e+08	1.47414e+08	1.49504e+08	1.07779e+08	1.08534e+08	1.06249e+08	Acetyl [N-Term]
High	High	IsMasterProtein	Q8NI27	THO complex subunit 2 OS=Homo sapiens GN=THOC2 PE=1 SV=2	0	0	46	62	535	62	1	1593	182.7	8.44	12926	383.85	60	18	0	3.19315e+08	3.17254e+08	3.22053e+08	3.36182e+08	3.37256e+08	3.32192e+08	3.27939e+08	3.34565e+08	3.30172e+08	Acetyl [N-Term]
High	High	IsMasterProtein	Q96A33	Coiled-coil domain-containing protein 47 OS=Homo sapiens GN=CCDC47 PE=1 SV=1	0	0	46	24	397	24	1	483	55.8	4.87	9505	383.5	24	13	0	4.19266e+08	4.30049e+08	4.30839e+08	4.67426e+08	4.79074e+08	4.73028e+08	5.54454e+08	5.97612e+08	5.66655e+08
High	High	IsMasterProtein	Q86TU7	Histone-lysine N-methyltransferase setd3 OS=Homo sapiens GN=SETD3 PE=1 SV=1	0	0	54	31	382	31	1	594	67.2	5.96	9507	383.21	30	13	0	1.83757e+08	1.81024e+08	1.89048e+08	2.02276e+08	2.14181e+08	2.08675e+08	2.19791e+08	2.27592e+08	2.21045e+08
High	High	IsMasterProtein	Q9NRY5	Protein FAM114A2 OS=Homo sapiens GN=FAM114A2 PE=1 SV=4	0	0	73	34	420	34	1	505	55.4	4.88	11061	382.51	33	18	0	2.29129e+08	2.48494e+08	2.32479e+08	2.49773e+08	2.62636e+08	2.54923e+08	2.50663e+08	2.58099e+08	2.54343e+08	Acetyl [N-Term]
High	High	IsMasterProtein	Q8IZL8	Proline-, glutamic acid- and leucine-rich protein 1 OS=Homo sapiens GN=PELP1 PE=1 SV=2	0	0	47	32	306	32	1	1130	119.6	4.34	6846	382.4	31	18	0	1.15036e+08	1.27096e+08	1.20068e+08	1.18835e+08	1.26932e+08	1.23683e+08	1.39444e+08	1.44334e+08	1.36603e+08	Acetyl [N-Term]
High	High	IsMasterProtein	Q8N6T3	ADP-ribosylation factor GTPase-activating protein 1 OS=Homo sapiens GN=ARFGAP1 PE=1 SV=2	0	0	66	20	306	20	1	406	44.6	5.66	7652	382.23	19	13	0	1.43752e+08	1.41908e+08	1.41545e+08	1.43814e+08	1.58479e+08	1.62682e+08	1.94651e+08	2.15305e+08	2.04905e+08
High	High	IsMasterProtein	P21399	Cytoplasmic aconitate hydratase OS=Homo sapiens GN=ACO1 PE=1 SV=3	0	0	54	39	431	39	1	889	98.3	6.68	9315	381.93	38	13	0	4.99233e+08	5.12983e+08	5.00862e+08	5.54132e+08	5.47079e+08	5.56786e+08	6.98172e+08	6.9273e+08	6.59681e+08	Acetyl [N-Term]
High	High	IsMasterProtein	Q9BY77	Polymerase delta-interacting protein 3 OS=Homo sapiens GN=POLDIP3 PE=1 SV=2	0	0	68	27	335	27	1	421	46.1	9.99	7550	381.77	27	14	0	1.57099e+08	1.63132e+08	1.52659e+08	1.71425e+08	1.69185e+08	1.79044e+08	2.0053e+08	2.01087e+08	1.94007e+08	Acetyl [N-Term]
High	High	IsMasterProtein	Q9Y383	Putative RNA-binding protein Luc7-like 2 OS=Homo sapiens GN=LUC7L2 PE=1 SV=2	0	0	48	23	488	16	1	392	46.5	10.01	12306	381.1	23	8	9	9.65058e+08	1.00151e+09	9.26267e+08	1.02331e+09	1.01358e+09	1.05589e+09	1.04708e+09	1.07292e+09	1.04521e+09	Acetyl [N-Term]
High	High	IsMasterProtein	P62314	Small nuclear ribonucleoprotein Sm D1 OS=Homo sapiens GN=SNRPD1 PE=1 SV=1	0	0	55	5	231	5	1	119	13.3	11.56	4761	380.65	5	5	0	3.3559e+08	3.20783e+08	3.70112e+08	3.51131e+08	3.78671e+08	3.82457e+08	4.39046e+08	4.52048e+08	4.28657e+08
High	High	IsMasterProtein	Q9BUH6	Protein PAXX OS=Homo sapiens GN=C9orf142 PE=1 SV=2	0	0	71	13	236	13	1	204	21.6	5.48	6586	380.3	13	11	0	9.83913e+07	9.72452e+07	9.99547e+07	1.04798e+08	1.07678e+08	1.09259e+08	1.05369e+08	1.0975e+08	1.01644e+08	Acetyl [N-Term]
High	High	IsMasterProtein	Q8N3C0	Activating signal cointegrator 1 complex subunit 3 OS=Homo sapiens GN=ASCC3 PE=1 SV=3	0	0	38	67	534	67	1	2202	251.3	7.09	12479	380.09	65	27	0	2.13718e+08	2.20613e+08	2.14626e+08	2.10024e+08	2.26586e+08	2.20573e+08	2.97774e+08	3.05744e+08	2.73228e+08
High	High	IsMasterProtein	Q86VM9	Zinc finger CCCH domain-containing protein 18 OS=Homo sapiens GN=ZC3H18 PE=1 SV=2	0	0	31	24	316	24	1	953	106.3	8.32	6872	379.32	24	9	0	9.87128e+07	1.01608e+08	1.08116e+08	9.59439e+07	9.9219e+07	1.02108e+08	1.0481e+08	1.09653e+08	1.00075e+08
High	High	IsMasterProtein	P22033	Methylmalonyl-CoA mutase, mitochondrial OS=Homo sapiens GN=MUT PE=1 SV=4	0	0	48	30	317	30	1	750	83.1	6.93	7082	379.3	30	16	0	1.63613e+08	1.56137e+08	1.70967e+08	1.38736e+08	1.42043e+08	1.46962e+08	2.37244e+08	2.52524e+08	2.3632e+08
High	High	IsMasterProtein	Q13404	Ubiquitin-conjugating enzyme E2 variant 1 OS=Homo sapiens GN=UBE2V1 PE=1 SV=2	0	0	59	8	322	3	1	147	16.5	7.93	6773	379.28	8	4	7	5.30132e+08	5.29927e+08	5.39909e+08	5.78066e+08	5.77132e+08	5.66488e+08	5.76435e+08	5.89767e+08	5.47777e+08
High	High	IsMasterProtein	O75312	Zinc finger protein ZPR1 OS=Homo sapiens GN=ZPR1 PE=1 SV=1	0	0	56	21	308	21	1	459	50.9	4.73	6132	378.33	21	11	0	1.6036e+08	1.61129e+08	1.52176e+08	1.60209e+08	1.58832e+08	1.65533e+08	1.85054e+08	1.92844e+08	1.86047e+08
High	High	IsMasterProtein	Q9NWH9	SAFB-like transcription modulator OS=Homo sapiens GN=SLTM PE=1 SV=2	0	0	48	51	529	51	1	1034	117.1	7.87	13858	378.32	50	21	0	2.32673e+08	2.488e+08	2.43789e+08	2.23949e+08	2.44065e+08	2.49422e+08	2.87315e+08	3.05681e+08	2.69873e+08	Acetyl [N-Term]
High	High	IsMasterProtein	O75822	Eukaryotic translation initiation factor 3 subunit J OS=Homo sapiens GN=EIF3J PE=1 SV=2	0	0	63	19	394	19	1	258	29	4.83	9754	377.53	19	12	0	4.57444e+08	4.76337e+08	4.68807e+08	4.38056e+08	4.59088e+08	4.44376e+08	5.03565e+08	5.74838e+08	5.29943e+08	Acetyl [N-Term]
High	High	IsMasterProtein	O94905	Erlin-2 OS=Homo sapiens GN=ERLIN2 PE=1 SV=1	0	0	61	19	374	17	1	339	37.8	5.62	9561	376.47	19	10	2	4.19953e+08	4.22947e+08	4.40526e+08	3.69668e+08	4.0169e+08	4.18137e+08	5.13719e+08	5.41679e+08	5.19468e+08
High	High	IsMasterProtein	Q92615	La-related protein 4B OS=Homo sapiens GN=LARP4B PE=1 SV=3	0	0	47	32	329	32	1	738	80.5	6.92	7739	376.41	31	12	0	1.57612e+08	1.76698e+08	1.73141e+08	1.6729e+08	1.61647e+08	1.78632e+08	1.87057e+08	1.93515e+08	1.73311e+08
High	High	IsMasterProtein	Q96I24	Far upstream element-binding protein 3 OS=Homo sapiens GN=FUBP3 PE=1 SV=2	0	0	72	30	438	25	1	572	61.6	8.38	9051	376.41	30	14	0	2.21475e+08	2.31494e+08	2.32375e+08	2.3454e+08	2.50435e+08	2.5987e+08	2.95143e+08	3.09816e+08	2.75665e+08	Acetyl [N-Term]
High	High	IsMasterProtein	Q969G3	SWI/SNF-related matrix-associated actin-dependent regulator of chromatin subfamily E member 1 OS=Homo sapiens GN=SMARCE1 PE=1 SV=2	0	0	67	21	301	20	1	411	46.6	4.88	5753	376.36	21	12	0	1.65105e+08	1.71866e+08	1.63199e+08	1.63076e+08	1.65816e+08	1.71851e+08	1.76855e+08	1.68503e+08	1.57532e+08
High	High	IsMasterProtein	P28482	Mitogen-activated protein kinase 1 OS=Homo sapiens GN=MAPK1 PE=1 SV=3	0	0	65	21	382	14	1	360	41.4	6.98	9052	375.94	20	13	0	3.658e+08	3.88598e+08	3.72526e+08	3.85219e+08	3.71128e+08	4.0543e+08	3.28014e+08	3.54658e+08	3.21476e+08	Acetyl [N-Term]
High	High	IsMasterProtein	P58546	Myotrophin OS=Homo sapiens GN=MTPN PE=1 SV=2	0	0	69	6	253	6	1	118	12.9	5.52	4753	375.93	6	3	0	6.95016e+08	6.89588e+08	6.31403e+08	6.32099e+08	6.32119e+08	6.93884e+08	9.62864e+08	9.8289e+08	9.43714e+08
High	High	IsMasterProtein	O60231	Putative pre-mRNA-splicing factor ATP-dependent RNA helicase DHX16 OS=Homo sapiens GN=DHX16 PE=1 SV=2	0	0	41	38	381	36	1	1041	119.2	6.8	7843	375.74	38	14	1	1.59533e+08	1.77705e+08	1.80513e+08	1.56677e+08	1.69724e+08	1.7763e+08	1.57136e+08	1.5905e+08	1.51642e+08
High	High	IsMasterProtein	Q8NCW5	NAD(P)H-hydrate epimerase OS=Homo sapiens GN=NAXE PE=1 SV=2	0	0	54	15	249	15	1	288	31.7	7.66	5143	375.57	14	11	0	4.27702e+08	4.33834e+08	4.21899e+08	509172661	4.95934e+08	5.04871e+08	613726725	6.15297e+08	6.06917e+08
High	High	IsMasterProtein	Q9P260	LisH domain and HEAT repeat-containing protein KIAA1468 OS=Homo sapiens GN=KIAA1468 PE=1 SV=2	0	0	40	36	304	36	1	1216	134.5	5.45	7149	375.27	36	18	0	9.50951e+07	9.7154e+07	8.99223e+07	1.06559e+08	1.12352e+08	1.16744e+08	1.32341e+08	1.34374e+08	1.31282e+08
High	High	IsMasterProtein	P51003	Poly(A) polymerase alpha OS=Homo sapiens GN=PAPOLA PE=1 SV=4	0	0	54	32	405	29	1	745	82.8	7.37	10113	374.97	32	21	3	2.2191e+08	2.22132e+08	2.38236e+08	2.56811e+08	2.54804e+08	2.66886e+08	2.4451e+08	2.50008e+08	2.5353e+08
High	High	IsMasterProtein	P52306	Rap1 GTPase-GDP dissociation stimulator 1 OS=Homo sapiens GN=RAP1GDS1 PE=1 SV=3	0	0	43	20	303	20	1	607	66.3	5.31	6800	374.94	19	11	0	1.54843e+08	1.62753e+08	1.59306e+08	1.55037e+08	1.66496e+08	1.67741e+08	2.02005e+08	2.0855e+08	2.03104e+08
High	High	IsMasterProtein	P57740	Nuclear pore complex protein Nup107 OS=Homo sapiens GN=NUP107 PE=1 SV=1	0	0	47	38	364	38	1	925	106.3	5.43	7957	374.92	38	20	0	2.22673e+08	2.30399e+08	2.21126e+08	2.22428e+08	2.33163e+08	2.34983e+08	2.61535e+08	2.71269e+08	2.59625e+08
High	High	IsMasterProtein	Q96I99	Succinate--CoA ligase [GDP-forming] subunit beta, mitochondrial OS=Homo sapiens GN=SUCLG2 PE=1 SV=2	0	0	56	21	364	21	1	432	46.5	6.39	8374	374.11	21	13	0	3.66468e+08	3.7539e+08	3.71399e+08	3.48785e+08	3.55532e+08	3.75119e+08	4.76498e+08	4.87141e+08	4.70285e+08
High	High	IsMasterProtein	Q969V3	Nicalin OS=Homo sapiens GN=NCLN PE=1 SV=2	0	0	45	22	327	22	1	563	62.9	6.89	8980	373.7	22	12	0	1.75338e+08	1.80264e+08	1.79753e+08	1.76029e+08	1.89204e+08	1.89032e+08	2.17828e+08	2.22566e+08	2.10844e+08
High	High	IsMasterProtein	Q9H6R4	Nucleolar protein 6 OS=Homo sapiens GN=NOL6 PE=1 SV=2	0	0	36	30	330	30	1	1146	127.5	7.64	8086	372.5	29	18	0	1.79525e+08	1.84651e+08	1.77034e+08	1.77276e+08	1.74273e+08	1.74161e+08	2.24571e+08	2.14394e+08	2.06621e+08
High	High	IsMasterProtein	Q04609	Glutamate carboxypeptidase 2 OS=Homo sapiens GN=FOLH1 PE=1 SV=1	0	0	46	30	523	29	1	750	84.3	6.98	12930	372.09	30	14	1	8.70012e+08	8.72172e+08	8.48723e+08	7.43911e+08	8.00351e+08	7.8734e+08	8.04914e+08	8.36633e+08	8.00997e+08	Acetyl [N-Term]
High	High	IsMasterProtein	P18858	DNA ligase 1 OS=Homo sapiens GN=LIG1 PE=1 SV=1	0	0	46	30	287	30	1	919	101.7	5.62	6452	371.81	30	20	0	1.04093e+08	1.06707e+08	1.10982e+08	1.00613e+08	1.02776e+08	1.13654e+08	7.84562e+07	8.10123e+07	7.46565e+07
High	High	IsMasterProtein	Q9Y281	Cofilin-2 OS=Homo sapiens GN=CFL2 PE=1 SV=1	0	0	80	15	354	10	1	166	18.7	7.88	7982	371.33	15	8	0	1.9211e+08	1.92917e+08	1.82328e+08	1.84502e+08	2.0275e+08	2.13985e+08	2.31973e+08	2.56276e+08	2.29243e+08	Acetyl [N-Term]
High	High	IsMasterProtein	Q9NVI7	ATPase family AAA domain-containing protein 3A OS=Homo sapiens GN=ATAD3A PE=1 SV=2	0	0	47	33	439	14	1	634	71.3	8.98	8107	371.01	33	16	19	4.39129e+08	4.79759e+08	4.88122e+08	4.21793e+08	4.6934e+08	4.58005e+08	5.88633e+08	5.97892e+08	5.61286e+08	Acetyl [N-Term]
High	High	IsMasterProtein	Q02818	Nucleobindin-1 OS=Homo sapiens GN=NUCB1 PE=1 SV=4	0	0	68	36	412	35	1	461	53.8	5.25	9027	370.87	35	21	0	4.66848e+08	4.58527e+08	5.11188e+08	3.85705e+08	4.22414e+08	4.1492e+08	5.15781e+08	512046781	4.63136e+08
High	High	IsMasterProtein	O14776	Transcription elongation regulator 1 OS=Homo sapiens GN=TCERG1 PE=1 SV=2	0	0	36	48	463	48	1	1098	123.8	8.65	9340	370.79	46	20	0	3.40388e+08	3.50044e+08	333105510	3.17085e+08	3.5458e+08	3.33792e+08	4.41977e+08	4.35897e+08	4.19848e+08
High	High	IsMasterProtein	Q9HC38	Glyoxalase domain-containing protein 4 OS=Homo sapiens GN=GLOD4 PE=1 SV=1	0	0	55	14	282	14	1	313	34.8	5.6	6561	370.57	13	8	0	3.43824e+08	3.71456e+08	3.69699e+08	4.54059e+08	4.57936e+08	4.51431e+08	4.9486e+08	4.9577e+08	4.84344e+08
High	High	IsMasterProtein	Q15813	Tubulin-specific chaperone E OS=Homo sapiens GN=TBCE PE=1 SV=1	0	0	73	31	346	30	1	527	59.3	6.76	7411	370.51	30	15	1	2.04363e+08	2.09956e+08	2.22937e+08	1.96471e+08	2.05102e+08	1.92071e+08	2.32288e+08	2.37749e+08	2.22165e+08	Acetyl [N-Term]
High	High	IsMasterProtein	Q7Z5L9	Interferon regulatory factor 2-binding protein 2 OS=Homo sapiens GN=IRF2BP2 PE=1 SV=2	0	0	62	21	273	17	1	587	61	8.69	6634	369.64	21	13	0	6.92691e+07	6.76677e+07	6.9395e+07	8.33062e+07	8.1482e+07	7.78402e+07	7.99584e+07	7.32178e+07	7.49719e+07	Acetyl [N-Term]
High	High	IsMasterProtein	P51553	Isocitrate dehydrogenase [NAD] subunit gamma, mitochondrial OS=Homo sapiens GN=IDH3G PE=1 SV=1	0	0	47	12	270	12	1	393	42.8	8.5	5700	369.45	12	8	0	9.84571e+07	9.69197e+07	9.82502e+07	9.10656e+07	9.42308e+07	8.86479e+07	1.32833e+08	1.35174e+08	1.313e+08
High	High	IsMasterProtein	Q1ED39	Lysine-rich nucleolar protein 1 OS=Homo sapiens GN=KNOP1 PE=1 SV=1	0	0	57	25	260	25	1	458	51.6	9.86	6326	368.8	24	16	0	1.06694e+08	1.09631e+08	1.06388e+08	1.0968e+08	1.00944e+08	1.15324e+08	1.66893e+08	1.66287e+08	1.68475e+08
High	High	IsMasterProtein	Q9Y6D5	Brefeldin A-inhibited guanine nucleotide-exchange protein 2 OS=Homo sapiens GN=ARFGEF2 PE=1 SV=3	0	0	34	53	422	37	1	1785	201.9	6.33	10366	368.78	53	20	0	1.00223e+08	1.08387e+08	1.05046e+08	1.0709e+08	1.10224e+08	1.12509e+08	1.07967e+08	1.14434e+08	1.04396e+08
High	High	IsMasterProtein	P42285	Superkiller viralicidic activity 2-like 2 OS=Homo sapiens GN=SKIV2L2 PE=1 SV=3	0	0	43	41	474	41	1	1042	117.7	6.52	11598	368.15	40	18	0	3.96798e+08	4.03588e+08	3.91784e+08	3.79418e+08	3.90477e+08	3.90142e+08	4.12077e+08	4.15076e+08	3.91494e+08	Acetyl [N-Term]
High	High	IsMasterProtein	Q96C86	m7GpppX diphosphatase OS=Homo sapiens GN=DCPS PE=1 SV=2	0	0	54	18	304	18	1	337	38.6	6.38	7358	368.1	18	10	0	2.9287e+08	2.97037e+08	2.98139e+08	3.23287e+08	3.15583e+08	3.31585e+08	3.46059e+08	3.7233e+08	359772178	Acetyl [N-Term]
High	High	IsMasterProtein	P54278	Mismatch repair endonuclease PMS2 OS=Homo sapiens GN=PMS2 PE=1 SV=2	0	0	43	29	286	24	1	862	95.7	6.86	6690	368.09	29	14	6	9.54481e+07	1.05763e+08	1.02504e+08	9.66983e+07	9.74937e+07	1.04351e+08	1.07529e+08	1.05487e+08	1.06106e+08
High	High	IsMasterProtein	A3KN83	Protein strawberry notch homolog 1 OS=Homo sapiens GN=SBNO1 PE=1 SV=1	0	0	44	44	347	37	1	1393	154.2	7.88	8289	367.7	41	25	7	1.30008e+08	1.29777e+08	1.27639e+08	1.2636e+08	1.31136e+08	1.33439e+08	1.6598e+08	1.70883e+08	1.66823e+08
High	High	IsMasterProtein	Q9UKK9	ADP-sugar pyrophosphatase OS=Homo sapiens GN=NUDT5 PE=1 SV=1	0	0	86	13	336	13	1	219	24.3	4.94	7037	367.64	13	9	0	3.12113e+08	3.24516e+08	3.12112e+08	2.78484e+08	2.92436e+08	2.78245e+08	3.073e+08	3.38987e+08	3.20814e+08	Acetyl [N-Term]
High	High	IsMasterProtein	Q9UPN4	Centrosomal protein of 131 kDa OS=Homo sapiens GN=CEP131 PE=1 SV=3	0	0	49	49	384	49	1	1083	122.1	8.69	9679	367.6	48	22	0	1.25314e+08	1.35367e+08	1.35688e+08	1.16792e+08	1.23355e+08	1.24543e+08	1.34274e+08	1.38095e+08	1.31838e+08
High	High	IsMasterProtein	Q7L5N1	COP9 signalosome complex subunit 6 OS=Homo sapiens GN=COPS6 PE=1 SV=1	0	0	53	12	266	12	1	327	36.1	5.73	5307	367.52	12	9	0	3.14838e+08	3.30426e+08	3.11053e+08	3.31501e+08	3.25806e+08	3.52485e+08	3.7938e+08	4.03912e+08	3.90044e+08
High	High	IsMasterProtein	Q96DI7	U5 small nuclear ribonucleoprotein 40 kDa protein OS=Homo sapiens GN=SNRNP40 PE=1 SV=1	0	0	60	16	265	16	1	357	39.3	8.1	6716	366.61	16	8	0	3.07684e+08	3.04098e+08	2.93923e+08	3.05287e+08	3.25775e+08	3.58344e+08	365619003	3.49867e+08	3.4565e+08
High	High	IsMasterProtein	Q9NQR4	Omega-amidase NIT2 OS=Homo sapiens GN=NIT2 PE=1 SV=1	0	0	81	19	329	19	1	276	30.6	7.21	7281	366.46	19	13	0	3.31646e+08	3.39946e+08	3.35936e+08	3.28102e+08	3.75118e+08	380053035	4.39738e+08	4.97405e+08	4.72023e+08
High	High	IsMasterProtein	Q14684	Ribosomal RNA processing protein 1 homolog B OS=Homo sapiens GN=RRP1B PE=1 SV=3	0	0	55	31	308	31	1	758	84.4	9.76	6425	366.02	31	15	0	1.49472e+08	1.56017e+08	1.55797e+08	1.45988e+08	1.54388e+08	1.52062e+08	1.57882e+08	1.63461e+08	1.55434e+08
High	High	IsMasterProtein	Q02809	Procollagen-lysine,2-oxoglutarate 5-dioxygenase 1 OS=Homo sapiens GN=PLOD1 PE=1 SV=2	0	0	47	27	331	27	1	727	83.5	6.95	7050	365.7	27	17	0	2.15524e+08	2.22835e+08	2.3008e+08	2.56039e+08	2.59683e+08	2.57229e+08	2.7242e+08	2.9714e+08	2.81209e+08
High	High	IsMasterProtein	Q92922	SWI/SNF complex subunit SMARCC1 OS=Homo sapiens GN=SMARCC1 PE=1 SV=3	0	0	47	49	566	40	1	1105	122.8	5.76	14474	365.64	48	24	0	2.01049e+08	2.27324e+08	2.1985e+08	1.92601e+08	2.00932e+08	2.03892e+08	1.83333e+08	1.97247e+08	1.82878e+08	Acetyl [N-Term]
High	High	IsMasterProtein	P51812	Ribosomal protein S6 kinase alpha-3 OS=Homo sapiens GN=RPS6KA3 PE=1 SV=1	0	0	62	36	408	23	1	740	83.7	6.89	9385	365.31	36	17	2	1.8603e+08	1.8918e+08	1.99866e+08	1.71756e+08	179605169	1.82214e+08	2.21006e+08	2.35505e+08	2.13889e+08
High	High	IsMasterProtein	Q86WU2	Probable D-lactate dehydrogenase, mitochondrial OS=Homo sapiens GN=LDHD PE=1 SV=1	0	0	74	23	254	23	1	507	54.8	6.65	5689	365.18	23	18	0	7.10374e+07	7.59007e+07	7.52681e+07	7.34622e+07	7.97244e+07	8.69299e+07	1.42318e+08	1.41951e+08	1.37966e+08
High	High	IsMasterProtein	Q86U86	Protein polybromo-1 OS=Homo sapiens GN=PBRM1 PE=1 SV=1	0	0	44	60	437	60	1	1689	192.8	6.89	9787	364.88	58	20	0	2.48532e+08	2.51869e+08	2.63678e+08	2.66031e+08	2.73137e+08	2.75098e+08	2.70431e+08	2.85478e+08	2.73845e+08
High	High	IsMasterProtein	O95747	Serine/threonine-protein kinase OSR1 OS=Homo sapiens GN=OXSR1 PE=1 SV=1	0	0	39	20	355	15	1	527	58	6.43	8615	364.44	20	11	0	3.2219e+08	3.14942e+08	3.04345e+08	3.31731e+08	3.2232e+08	3.26397e+08	4.03052e+08	4.13263e+08	4.00193e+08
High	High	IsMasterProtein	P21397	Amine oxidase [flavin-containing] A OS=Homo sapiens GN=MAOA PE=1 SV=1	0	0	53	24	467	24	1	527	59.6	7.85	11920	364.3	24	13	0	1.07781e+09	1.14604e+09	1.05089e+09	1.12911e+09	1.18096e+09	1.21881e+09	1.59669e+09	1.57337e+09	1.43544e+09	Acetyl [N-Term]
High	High	IsMasterProtein	P35573	Glycogen debranching enzyme OS=Homo sapiens GN=AGL PE=1 SV=3	0	0	45	56	398	56	1	1532	174.7	6.76	8758	363.77	55	24	0	1.62213e+08	1.69286e+08	1.70395e+08	1.74144e+08	1.78874e+08	1.80013e+08	2.30213e+08	2.46252e+08	2.28805e+08
High	High	IsMasterProtein	Q9BW19	Kinesin-like protein KIFC1 OS=Homo sapiens GN=KIFC1 PE=1 SV=2	0	0	37	21	233	21	1	673	73.7	8.98	5217	363.58	20	16	0	3.93122e+07	4.29278e+07	3.92181e+07	48512038	4.88713e+07	4.83382e+07	4.4012e+07	4.03723e+07	4.19969e+07
High	High	IsMasterProtein	Q15907	Ras-related protein Rab-11B OS=Homo sapiens GN=RAB11B PE=1 SV=4	0	0	63	14	340	13	1	218	24.5	5.94	7871	363.57	14	5	1	1.10027e+09	1.14719e+09	1.20287e+09	1.12666e+09	1.13019e+09	1.16621e+09	1.36641e+09	1.42526e+09	1.30569e+09	Acetyl [N-Term]
High	High	IsMasterProtein	Q15833	Syntaxin-binding protein 2 OS=Homo sapiens GN=STXBP2 PE=1 SV=2	0	0	55	28	349	27	1	593	66.4	6.55	8884	363.36	27	14	1	1.80666e+08	1.8511e+08	1.82895e+08	2.19086e+08	2.28617e+08	2.26567e+08	2.39416e+08	2.46965e+08	2.41907e+08
High	High	IsMasterProtein	P11182	Lipoamide acyltransferase component of branched-chain alpha-keto acid dehydrogenase complex, mitochondrial OS=Homo sapiens GN=DBT PE=1 SV=3	0	0	68	28	393	28	1	482	53.5	8.51	8749	363.3	28	14	0	4.09802e+08	4.29449e+08	4.43309e+08	3.54727e+08	3.89074e+08	3.73867e+08	6.49326e+08	6.35007e+08	6.41384e+08
High	High	IsMasterProtein	Q53EL6	Programmed cell death protein 4 OS=Homo sapiens GN=PDCD4 PE=1 SV=2	0	0	65	23	372	22	1	469	51.7	5.21	9721	363.13	23	13	2	3.26511e+08	3.54517e+08	3.52705e+08	3.06717e+08	3.37243e+08	3.20841e+08	3.618e+08	3.83222e+08	3.59244e+08
High	High	IsMasterProtein	Q7Z2T5	TRMT1-like protein OS=Homo sapiens GN=TRMT1L PE=1 SV=2	0	0	55	28	331	28	1	733	81.7	7.88	7582	363.11	28	16	0	1.19219e+08	1.29932e+08	1.39908e+08	1.32389e+08	1.45665e+08	1.45302e+08	1.73697e+08	1.74498e+08	1.49282e+08	Acetyl [N-Term]
High	High	IsMasterProtein	P30044	Peroxiredoxin-5, mitochondrial OS=Homo sapiens GN=PRDX5 PE=1 SV=4	0	0	57	11	348	11	1	214	22.1	8.7	7198	363.05	10	8	0	9.76309e+08	1.01197e+09	1.04998e+09	1.12302e+09	1.06356e+09	1.13225e+09	1.64295e+09	1.70577e+09	1.67469e+09
High	High	IsMasterProtein	P18615	Negative elongation factor E OS=Homo sapiens GN=NELFE PE=1 SV=3	0	0	54	17	279	17	1	380	43.2	9.33	7753	362.67	17	10	0	7.44945e+07	8.24288e+07	8.09698e+07	8.06196e+07	8.33084e+07	8.36421e+07	8.13405e+07	8.25664e+07	8.02715e+07
High	High	IsMasterProtein	Q658Y4	Protein FAM91A1 OS=Homo sapiens GN=FAM91A1 PE=1 SV=3	0	0	38	28	275	28	1	838	93.9	6.39	6192	362.44	27	14	0	1.24362e+08	1.4197e+08	125409581	1.3674e+08	1.33599e+08	1.45491e+08	154630871	1.64296e+08	1.64115e+08
High	High	IsMasterProtein	Q9Y570	Protein phosphatase methylesterase 1 OS=Homo sapiens GN=PPME1 PE=1 SV=3	0	0	55	19	364	19	1	386	42.3	5.97	8436	362.41	19	6	0	3.43331e+08	3.26892e+08	3.50904e+08	3.89281e+08	3.78869e+08	3.80096e+08	4.69389e+08	4.48037e+08	4.33985e+08
High	High	IsMasterProtein	P15374	Ubiquitin carboxyl-terminal hydrolase isozyme L3 OS=Homo sapiens GN=UCHL3 PE=1 SV=1	0	0	77	16	298	16	1	230	26.2	4.92	6915	362.26	15	11	0	3.89611e+08	4.01379e+08	3.61492e+08	3.99943e+08	3.91938e+08	4.10493e+08	4.38451e+08	4.52051e+08	4.46763e+08
High	High	IsMasterProtein	Q92769	Histone deacetylase 2 OS=Homo sapiens GN=HDAC2 PE=1 SV=2	0	0	49	26	405	20	1	488	55.3	5.91	8424	362.07	26	13	10	4.64426e+08	5.34154e+08	5.07122e+08	4.55553e+08	4.30712e+08	4.58769e+08	5.06404e+08	4.99407e+08	5.15487e+08	Acetyl [N-Term]
High	High	IsMasterProtein	Q7Z5J4	Retinoic acid-induced protein 1 OS=Homo sapiens GN=RAI1 PE=1 SV=2	0	0	37	43	320	43	1	1906	203.2	8.79	7543	361.93	41	22	0	5.18842e+07	5.01212e+07	5.27596e+07	5.24438e+07	5.53886e+07	5.64365e+07	5.6027e+07	5.42303e+07	5.29641e+07
High	High	IsMasterProtein	Q9Y4A5	Transformation/transcription domain-associated protein OS=Homo sapiens GN=TRRAP PE=1 SV=3	0	0	25	74	385	74	1	3859	437.3	8.19	8718	361.85	69	30	0	7.66615e+07	8.22051e+07	7.83719e+07	7.76254e+07	8.27938e+07	7.8814e+07	7.83047e+07	8.82478e+07	8.37248e+07
High	High	IsMasterProtein	P21291	Cysteine and glycine-rich protein 1 OS=Homo sapiens GN=CSRP1 PE=1 SV=3	0	0	64	12	345	12	1	193	20.6	8.57	8781	361.48	12	7	0	7.60196e+08	7.01752e+08	7.46332e+08	7.46663e+08	7.77995e+08	8.57923e+08	6.01381e+08	6.36533e+08	6.0253e+08
High	High	IsMasterProtein	Q08379	Golgin subfamily A member 2 OS=Homo sapiens GN=GOLGA2 PE=1 SV=3	0	0	56	43	365	43	1	1002	113	5.02	9513	361.33	41	23	0	1.0664e+08	1.23565e+08	1.21344e+08	1.26837e+08	1.42126e+08	1.38496e+08	1.59504e+08	1.64764e+08	1.58188e+08
High	High	IsMasterProtein	P53582	Methionine aminopeptidase 1 OS=Homo sapiens GN=METAP1 PE=1 SV=2	0	0	66	20	328	20	1	386	43.2	7.17	7798	361.22	20	12	0	2.31707e+08	2.43976e+08	2.41924e+08	2.46668e+08	2.51547e+08	2.60803e+08	3.00294e+08	3.22027e+08	2.88432e+08
High	High	IsMasterProtein	Q7Z434	Mitochondrial antiviral-signaling protein OS=Homo sapiens GN=MAVS PE=1 SV=2	0	0	59	17	269	17	1	540	56.5	5.52	6923	360.7	17	12	0	1.28074e+08	1.27792e+08	1.36678e+08	132770638	1.37397e+08	1.33647e+08	1.76406e+08	1.7915e+08	1.74573e+08
High	High	IsMasterProtein	Q15003	Condensin complex subunit 2 OS=Homo sapiens GN=NCAPH PE=1 SV=3	0	0	57	32	335	32	1	741	82.5	5.06	8822	360.55	31	18	0	2.08417e+08	2.13138e+08	2.21435e+08	2.00487e+08	2.20849e+08	2.14707e+08	1.77485e+08	1.83185e+08	1.786e+08
High	High	IsMasterProtein	Q8WWY3	U4/U6 small nuclear ribonucleoprotein Prp31 OS=Homo sapiens GN=PRPF31 PE=1 SV=2	0	0	57	22	297	22	1	499	55.4	5.78	5961	360.39	22	12	0	2.46304e+08	2.49643e+08	2.43024e+08	2.48478e+08	2.4965e+08	2.62044e+08	2.50917e+08	2.70403e+08	2.4771e+08
High	High	IsMasterProtein	Q9Y5L4	Mitochondrial import inner membrane translocase subunit Tim13 OS=Homo sapiens GN=TIMM13 PE=1 SV=1	0	0	78	8	366	8	1	95	10.5	8.18	10442	360.11	8	5	0	8.73227e+08	8.82875e+08	9.48137e+08	8.99443e+08	1.04025e+09	9.78585e+08	1.10888e+09	1.10262e+09	1.06398e+09	Acetyl [N-Term]
High	High	IsMasterProtein	P62424	60S ribosomal protein L7a OS=Homo sapiens GN=RPL7A PE=1 SV=2	0	0	46	16	462	16	1	266	30	10.61	12142	360.05	16	9	0	3.54744e+09	3.58926e+09	3.64273e+09	3.29984e+09	3.38272e+09	3.34854e+09	4.18146e+09	4.01394e+09	3.94515e+09
High	High	IsMasterProtein	Q9Y5A9	YTH domain-containing family protein 2 OS=Homo sapiens GN=YTHDF2 PE=1 SV=2	0	0	47	23	340	19	1	579	62.3	8.79	8728	359.73	21	13	5	4.81293e+08	4.82591e+08	4.71262e+08	5.16281e+08	4.88648e+08	4.94907e+08	5.83527e+08	5.68588e+08	5.46201e+08	Acetyl [N-Term]
High	High	IsMasterProtein	Q14997	Proteasome activator complex subunit 4 OS=Homo sapiens GN=PSME4 PE=1 SV=2	0	0	32	44	331	44	1	1843	211.2	6.9	6998	359.27	44	21	0	1.11752e+08	1.11371e+08	1.16046e+08	1.00558e+08	1.03105e+08	1.03826e+08	1.05988e+08	1.04495e+08	1.05373e+08
High	High	IsMasterProtein	Q12797	Aspartyl/asparaginyl beta-hydroxylase OS=Homo sapiens GN=ASPH PE=1 SV=3	0	0	35	19	267	19	1	758	85.8	5.01	8588	359.16	19	8	0	3.58601e+07	3.76626e+07	3.62887e+07	4.58788e+07	4.89092e+07	45510878	60022443	6.54701e+07	6.30926e+07
High	High	IsMasterProtein	P61106	Ras-related protein Rab-14 OS=Homo sapiens GN=RAB14 PE=1 SV=4	0	0	87	19	331	18	1	215	23.9	6.21	7375	359.15	19	13	1	8.3119e+08	8.16499e+08	8.627e+08	8.68498e+08	8.24877e+08	8.9903e+08	1.02417e+09	1.07417e+09	8.91773e+08	Acetyl [N-Term]
High	High	IsMasterProtein	Q96IZ0	PRKC apoptosis WT1 regulator protein OS=Homo sapiens GN=PAWR PE=1 SV=1	0	0	53	15	241	14	1	340	36.5	5.41	5438	359.15	15	10	1	8.20867e+07	9.65902e+07	9.95824e+07	1.10979e+08	1.21149e+08	1.14353e+08	1.50607e+08	1.42188e+08	1.32282e+08
High	High	IsMasterProtein	P21266	Glutathione S-transferase Mu 3 OS=Homo sapiens GN=GSTM3 PE=1 SV=3	0	0	74	21	544	21	1	225	26.5	5.54	14632	359.03	21	11	0	1.13214e+09	1.15691e+09	1.20298e+09	1.22599e+09	1.22147e+09	1.29297e+09	1.57144e+09	1.68766e+09	1.56928e+09	Acetyl [N-Term]
High	High	IsMasterProtein	Q5QJE6	Deoxynucleotidyltransferase terminal-interacting protein 2 OS=Homo sapiens GN=DNTTIP2 PE=1 SV=2	0	0	54	31	365	31	1	756	84.4	6.16	9728	358.9	31	16	0	1.7767e+08	1.79126e+08	1.85685e+08	1.74067e+08	1.8564e+08	1.83342e+08	2.1182e+08	2.1919e+08	2.16125e+08
High	High	IsMasterProtein	Q92747	Actin-related protein 2/3 complex subunit 1A OS=Homo sapiens GN=ARPC1A PE=1 SV=2	0	0	56	18	361	17	1	370	41.5	8.18	8755	358.89	18	11	1	4.34344e+08	4.23957e+08	3.96995e+08	4.48503e+08	4.75565e+08	4.8935e+08	5.48395e+08	5.81451e+08	5.1966e+08	Acetyl [N-Term]
High	High	IsMasterProtein	O75832	26S proteasome non-ATPase regulatory subunit 10 OS=Homo sapiens GN=PSMD10 PE=1 SV=1	0	0	59	11	263	11	1	226	24.4	6.1	5736	358.45	11	10	0	2.48872e+08	2.65954e+08	2.70891e+08	2.43078e+08	2.6926e+08	2.71423e+08	3.30852e+08	3.496e+08	3.24935e+08	Acetyl [N-Term]
High	High	IsMasterProtein	O15042	U2 snRNP-associated SURP motif-containing protein OS=Homo sapiens GN=U2SURP PE=1 SV=2	0	0	52	49	483	48	1	1029	118.2	8.47	10041	358.37	49	20	1	3.72346e+08	3.79957e+08	3.85876e+08	4.06946e+08	4.17745e+08	4.22189e+08	4.2972e+08	4.26614e+08	4.22003e+08
High	High	IsMasterProtein	Q16512	Serine/threonine-protein kinase N1 OS=Homo sapiens GN=PKN1 PE=1 SV=2	0	0	47	35	371	32	1	942	103.9	6.37	9355	357.8	35	15	0	1.6048e+08	1.72924e+08	1.62902e+08	1.68715e+08	1.74428e+08	1.84792e+08	2.29536e+08	2.25935e+08	2.23892e+08	Acetyl [N-Term]
High	High	IsMasterProtein	Q9Y5K5	Ubiquitin carboxyl-terminal hydrolase isozyme L5 OS=Homo sapiens GN=UCHL5 PE=1 SV=3	0	0	84	22	346	22	1	329	37.6	5.33	7435	357.66	21	12	0	3.06783e+08	3.0976e+08	3.34079e+08	3.1916e+08	3.57242e+08	3.37547e+08	3.60741e+08	3.66017e+08	3.50003e+08	Acetyl [N-Term]
High	High	IsMasterProtein	Q9UKV8	Protein argonaute-2 OS=Homo sapiens GN=AGO2 PE=1 SV=3	0	0	56	36	332	29	1	859	97.1	9.19	7068	357.41	36	15	9	1.12683e+08	1.19741e+08	1.17465e+08	1.41313e+08	1.46118e+08	1.52761e+08	1.82867e+08	1.94091e+08	1.84495e+08	Acetyl [N-Term]
High	High	IsMasterProtein	O14579	Coatomer subunit epsilon OS=Homo sapiens GN=COPE PE=1 SV=3	0	0	80	20	374	20	1	308	34.5	5.12	8703	357.34	20	12	0	5.12054e+08	4.84353e+08	4.89805e+08	5.03098e+08	4.96819e+08	5.37084e+08	5.68381e+08	5.86227e+08	5.64324e+08
High	High	IsMasterProtein	P35613	Basigin OS=Homo sapiens GN=BSG PE=1 SV=2	0	0	34	10	270	10	1	385	42.2	5.66	5837	357.02	10	6	0	3.20109e+08	3.26071e+08	327734307	3.66891e+08	3.70019e+08	4.1908e+08	4.65291e+08	4.30754e+08	4.47744e+08
High	High	IsMasterProtein	Q2NKX8	DNA excision repair protein ERCC-6-like OS=Homo sapiens GN=ERCC6L PE=1 SV=1	0	0	44	40	305	40	1	1250	141	5.31	6730	356.88	40	24	0	1.03558e+08	1.12349e+08	1.11528e+08	8.3639e+07	9.0205e+07	9.56422e+07	8.02585e+07	7.91321e+07	6.29451e+07
High	High	IsMasterProtein	Q9UI12	V-type proton ATPase subunit H OS=Homo sapiens GN=ATP6V1H PE=1 SV=1	0	0	56	23	320	23	1	483	55.8	6.48	6553	356.67	23	15	0	2.19733e+08	2.44001e+08	2.43421e+08	2.4895e+08	2.43657e+08	2.49842e+08	3.37359e+08	3.34873e+08	2.97383e+08
High	High	IsMasterProtein	Q9NVI1	Fanconi anemia group I protein OS=Homo sapiens GN=FANCI PE=1 SV=4	0	0	36	37	298	36	1	1328	149.2	6.74	6013	356.48	37	20	1	1.48466e+08	1.42419e+08	1.51486e+08	1.14456e+08	1.18446e+08	1.22986e+08	6.9222e+07	8.25687e+07	7.54079e+07
High	High	IsMasterProtein	O75439	Mitochondrial-processing peptidase subunit beta OS=Homo sapiens GN=PMPCB PE=1 SV=2	0	0	54	21	321	20	1	489	54.3	6.83	8308	356.27	21	10	0	2.10316e+08	2.04639e+08	2.19595e+08	2.09344e+08	2.13716e+08	2.25852e+08	3.07069e+08	3.21191e+08	2.9422e+08
High	High	IsMasterProtein	Q9NU22	Midasin OS=Homo sapiens GN=MDN1 PE=1 SV=2	0	0	19	79	402	78	1	5596	632.4	5.68	8863	355.65	76	35	1	8.45518e+07	8.859e+07	8.95093e+07	7.47176e+07	7.09566e+07	7.98829e+07	7.04315e+07	7.7731e+07	7.33913e+07
High	High	IsMasterProtein	O95140	Mitofusin-2 OS=Homo sapiens GN=MFN2 PE=1 SV=3	0	0	44	30	310	29	1	757	86.3	6.98	6360	355.28	30	18	1	1.14152e+08	1.18885e+08	1.23458e+08	108948640	1.18981e+08	1.21539e+08	9.44993e+07	9.58299e+07	9.24405e+07
High	High	IsMasterProtein	P43487	Ran-specific GTPase-activating protein OS=Homo sapiens GN=RANBP1 PE=1 SV=1	0	0	75	14	287	13	1	201	23.3	5.29	5959	355.13	14	7	0	1.28247e+09	1.45922e+09	1.26669e+09	1.19995e+09	1.41214e+09	1.27584e+09	1.31263e+09	1.38738e+09	1.28618e+09
High	High	IsMasterProtein	Q9BU89	Deoxyhypusine hydroxylase OS=Homo sapiens GN=DOHH PE=1 SV=1	0	0	76	16	222	16	1	302	32.9	4.83	4934	354.81	16	13	0	8.57729e+07	9.18951e+07	8.90272e+07	1.00975e+08	1.0012e+08	9.46385e+07	1.29535e+08	1.33716e+08	1.36261e+08	Acetyl [N-Term]
High	High	IsMasterProtein	Q9NXC5	WD repeat-containing protein mio OS=Homo sapiens GN=MIOS PE=1 SV=2	0	0	52	34	320	34	1	875	98.5	6.73	7647	353.96	33	19	0	8.53277e+07	8.72168e+07	9.0368e+07	9.22281e+07	9.08479e+07	1.02338e+08	1.22842e+08	1.16677e+08	1.14498e+08	Acetyl [N-Term]
High	High	IsMasterProtein	P98194	Calcium-transporting ATPase type 2C member 1 OS=Homo sapiens GN=ATP2C1 PE=1 SV=3	0	0	40	29	313	29	1	919	100.5	6.74	8221	353.36	29	15	0	1.31816e+08	1.41633e+08	1.35409e+08	1.60552e+08	1.57672e+08	1.53659e+08	1.86732e+08	1.76867e+08	1.75292e+08
High	High	IsMasterProtein	P08195	4F2 cell-surface antigen heavy chain OS=Homo sapiens GN=SLC3A2 PE=1 SV=3	0	0	42	20	268	20	1	630	68	5.01	6594	352.67	19	15	0	2.06861e+08	2.03386e+08	1.98671e+08	2.38713e+08	2.4462e+08	2.63798e+08	2.28359e+08	2.30876e+08	2.12938e+08	Acetyl [N-Term]
High	High	IsMasterProtein	O94964	Protein SOGA1 OS=Homo sapiens GN=SOGA1 PE=1 SV=2	0	0	52	60	421	58	1	1423	159.7	6.46	9815	352.31	59	26	2	1.57537e+08	1.63843e+08	1.69729e+08	1.5132e+08	1.56668e+08	1.62142e+08	1.91314e+08	1.91404e+08	1.84579e+08
High	High	IsMasterProtein	Q9BXW7	Cat eye syndrome critical region protein 5 OS=Homo sapiens GN=CECR5 PE=1 SV=1	0	0	53	17	261	17	1	423	46.3	8.13	6748	352.29	17	10	0	1.36686e+08	1.6279e+08	1.60946e+08	1.43885e+08	1.49268e+08	1.50816e+08	2.04237e+08	2.25183e+08	2.13524e+08
High	High	IsMasterProtein	Q8N766	ER membrane protein complex subunit 1 OS=Homo sapiens GN=EMC1 PE=1 SV=1	0	0	48	37	375	37	1	993	111.7	7.66	8863	352.09	36	19	0	2.31114e+08	2.3915e+08	2.36878e+08	2.21331e+08	2.36449e+08	2.36684e+08	2.73863e+08	2.89776e+08	2.81952e+08
High	High	IsMasterProtein	Q92797	Symplekin OS=Homo sapiens GN=SYMPK PE=1 SV=2	0	0	46	45	324	45	1	1274	141.1	6.13	6506	351.71	43	20	0	2.00453e+08	2.29909e+08	2.11373e+08	1.87275e+08	2.24002e+08	1.97331e+08	1.95146e+08	1.73972e+08	1.96521e+08	Acetyl [N-Term]
High	High	IsMasterProtein	Q01085	Nucleolysin TIAR OS=Homo sapiens GN=TIAL1 PE=1 SV=1	0	0	48	14	323	12	1	375	41.6	7.74	7744	351.5	14	10	3	3.59044e+08	3.40443e+08	3.4464e+08	3.4616e+08	3.35471e+08	3.29456e+08	3.71952e+08	3.88512e+08	3.5285e+08
High	High	IsMasterProtein	Q12849	G-rich sequence factor 1 OS=Homo sapiens GN=GRSF1 PE=1 SV=3	0	0	64	24	345	24	1	480	53.1	6.19	7173	351.2	22	14	0	2.856e+08	2.75911e+08	2.70416e+08	2.60297e+08	2.52906e+08	2.69714e+08	3.35271e+08	3.66426e+08	3.5524e+08
High	High	IsMasterProtein	Q8IYD1	Eukaryotic peptide chain release factor GTP-binding subunit ERF3B OS=Homo sapiens GN=GSPT2 PE=1 SV=2	0	0	43	21	362	6	1	628	68.8	5.43	7759	351.18	20	12	0	1.17159e+08	1.14283e+08	1.05016e+08	1.15603e+08	9.46759e+07	1.16857e+08	145458159	1.46685e+08	1.29409e+08
High	High	IsMasterProtein	P26583	High mobility group protein B2 OS=Homo sapiens GN=HMGB2 PE=1 SV=2	0	0	56	18	492	14	1	209	24	7.81	12548	350.59	17	11	1	1.08298e+09	1.09979e+09	1.21466e+09	1.15488e+09	1.29634e+09	1.27964e+09	1.2532e+09	1.25144e+09	1.2961e+09	Acetyl [N-Term]
High	High	IsMasterProtein	Q14558	Phosphoribosyl pyrophosphate synthase-associated protein 1 OS=Homo sapiens GN=PRPSAP1 PE=1 SV=2	0	0	53	16	250	14	1	356	39.4	7.2	5616	350.03	15	11	0	1.09062e+08	1.17114e+08	1.11652e+08	1.09098e+08	1.08986e+08	1.13069e+08	1.12247e+08	1.16799e+08	1.11331e+08
High	High	IsMasterProtein	Q9Y295	Developmentally-regulated GTP-binding protein 1 OS=Homo sapiens GN=DRG1 PE=1 SV=1	0	0	61	20	283	20	1	367	40.5	8.9	6072	349.94	19	13	0	2.66534e+08	2.58061e+08	2.62516e+08	2.72726e+08	2.80162e+08	2.94336e+08	3.21653e+08	3.25542e+08	3.10279e+08
High	High	IsMasterProtein	O00303	Eukaryotic translation initiation factor 3 subunit F OS=Homo sapiens GN=EIF3F PE=1 SV=1	0	0	38	13	341	13	1	357	37.5	5.45	8221	349.81	13	6	0	8.02278e+08	8.00215e+08	7.85417e+08	8.14104e+08	7.77242e+08	8.73278e+08	9.41048e+08	1.03381e+09	9.39612e+08
High	High	IsMasterProtein	Q15717	ELAV-like protein 1 OS=Homo sapiens GN=ELAVL1 PE=1 SV=2	0	0	56	18	347	16	1	326	36.1	9.17	7440	349.73	18	8	2	9.73816e+08	9.49661e+08	9.45114e+08	8.1215e+08	9.30196e+08	9.53907e+08	1.1413e+09	1.09333e+09	1.05524e+09	Acetyl [N-Term]
High	High	IsMasterProtein	Q5UIP0	Telomere-associated protein RIF1 OS=Homo sapiens GN=RIF1 PE=1 SV=2	0	0	29	56	346	55	1	2472	274.3	5.52	7810	349.5	55	27	1	9.08766e+07	8.96333e+07	9.2234e+07	9.30285e+07	9.34704e+07	9.51406e+07	7.6409e+07	7.47279e+07	7.41357e+07
High	High	IsMasterProtein	Q9BZK7	F-box-like/WD repeat-containing protein TBL1XR1 OS=Homo sapiens GN=TBL1XR1 PE=1 SV=1	0	0	54	19	255	13	1	514	55.6	5.55	7358	349.44	19	13	5	1.25117e+08	1.30179e+08	1.29587e+08	1.06741e+08	1.11636e+08	1.07613e+08	1.31056e+08	1.38881e+08	1.35357e+08	Acetyl [N-Term]
High	High	IsMasterProtein	Q96QC0	Serine/threonine-protein phosphatase 1 regulatory subunit 10 OS=Homo sapiens GN=PPP1R10 PE=1 SV=1	0	0	44	34	376	34	1	940	99	9.17	7898	349.43	34	13	0	2.12632e+08	2.28316e+08	2.18474e+08	2.0824e+08	2.14788e+08	2.14258e+08	2.40214e+08	2.33894e+08	2.38187e+08	Acetyl [N-Term]
High	High	IsMasterProtein	Q6P3W7	SCY1-like protein 2 OS=Homo sapiens GN=SCYL2 PE=1 SV=1	0	0	42	29	280	29	1	929	103.6	8.22	6377	349.13	27	18	0	9.92826e+07	1.20667e+08	1.13616e+08	1.10385e+08	1.14669e+08	1.09884e+08	1.39182e+08	1.33984e+08	1.2158e+08
High	High	IsMasterProtein	Q6PD62	RNA polymerase-associated protein CTR9 homolog OS=Homo sapiens GN=CTR9 PE=1 SV=1	0	0	38	33	329	33	1	1173	133.4	6.77	7249	349.01	33	17	0	1.83018e+08	1.99991e+08	1.9199e+08	1.81431e+08	1.89587e+08	1.89701e+08	1.75087e+08	1.78524e+08	1.6562e+08
High	High	IsMasterProtein	P40925	Malate dehydrogenase, cytoplasmic OS=Homo sapiens GN=MDH1 PE=1 SV=4	0	0	40	12	384	12	1	334	36.4	7.36	9163	348.56	12	4	0	1.33333e+09	1.45511e+09	1.4437e+09	1.486e+09	1.62376e+09	1.49398e+09	1.8212e+09	1.75486e+09	1.68331e+09
High	High	IsMasterProtein	O96019	Actin-like protein 6A OS=Homo sapiens GN=ACTL6A PE=1 SV=1	0	0	55	17	273	17	1	429	47.4	5.6	6439	348.26	17	11	0	4.07945e+08	4.01335e+08	3.66654e+08	4.10852e+08	3.89373e+08	4.07992e+08	4.46647e+08	4.3767e+08	4.39165e+08
High	High	IsMasterProtein	Q9Y4D8	Probable E3 ubiquitin-protein ligase HECTD4 OS=Homo sapiens GN=HECTD4 PE=1 SV=5	0	0	22	62	337	62	1	3996	439.1	6.19	8603	348.19	59	30	0	6.25871e+07	6.79957e+07	6.92717e+07	7.34201e+07	7.5752e+07	7.58437e+07	9.74541e+07	9.75855e+07	9.12998e+07
High	High	IsMasterProteinCandidate	P0DJD0	RANBP2-like and GRIP domain-containing protein 1 OS=Homo sapiens GN=RGPD1 PE=2 SV=1	0	0	23	38	431	1	1	1748	196.5	6.14	11601	348.14	38	17	0	877467	1.05089e+06	1190316	602330	436705	580853	453133	488458	662901
High	High	IsMasterProtein	P0DJD1	RANBP2-like and GRIP domain-containing protein 2 OS=Homo sapiens GN=RGPD2 PE=2 SV=1	0	0	23	38	431	1	1	1756	197.2	6.2	11601	348.14	38	17	0	877467	1.05089e+06	1190316	602330	436705	580853	453133	488458	662901
High	High	IsMasterProtein	P80404	4-aminobutyrate aminotransferase, mitochondrial OS=Homo sapiens GN=ABAT PE=1 SV=3	0	0	61	22	270	22	1	500	56.4	7.96	6569	347.96	22	14	0	1.67097e+08	1.72632e+08	1.67039e+08	1.72014e+08	1.57698e+08	1.68211e+08	2.03026e+08	1.99739e+08	2.04053e+08
High	High	IsMasterProtein	Q96KG9	N-terminal kinase-like protein OS=Homo sapiens GN=SCYL1 PE=1 SV=1	0	0	61	34	310	34	1	808	89.6	6.3	6510	347.65	33	20	0	2.06922e+08	2.00581e+08	2.07868e+08	2.04888e+08	2.2127e+08	2.21297e+08	2.55166e+08	2.43926e+08	2.50689e+08
High	High	IsMasterProtein	Q9H0L4	Cleavage stimulation factor subunit 2 tau variant OS=Homo sapiens GN=CSTF2T PE=1 SV=1	0	0	56	23	284	13	1	616	64.4	7.25	6915	347.64	23	11	12	2.08478e+08	2.1314e+08	2.22904e+08	1.90769e+08	2.05245e+08	1.97425e+08	2.28149e+08	2.41406e+08	2.19841e+08	Acetyl [N-Term]
High	High	IsMasterProtein	P55263	Adenosine kinase OS=Homo sapiens GN=ADK PE=1 SV=2	0	0	79	23	365	23	1	362	40.5	6.7	9025	347.55	22	10	0	6.08168e+08	6.49804e+08	6.84825e+08	6.20987e+08	6.78072e+08	6.55855e+08	7.67767e+08	8.02219e+08	7.7192e+08	Acetyl [N-Term]
High	High	IsMasterProtein	P34896	Serine hydroxymethyltransferase, cytosolic OS=Homo sapiens GN=SHMT1 PE=1 SV=1	0	0	57	23	398	21	1	483	53	7.71	9694	347.5	23	13	0	4.99103e+08	5.23602e+08	5.21737e+08	5.35991e+08	5.68905e+08	5.73858e+08	5.428e+08	5.7635e+08	5.39434e+08	Acetyl [N-Term]
High	High	IsMasterProtein	Q68CP9	AT-rich interactive domain-containing protein 2 OS=Homo sapiens GN=ARID2 PE=1 SV=2	0	0	35	42	358	42	1	1835	197.3	7.42	8467	347.26	42	21	0	1.03469e+08	1.08524e+08	1.09036e+08	1.03092e+08	1.05887e+08	1.07126e+08	1.08642e+08	1.11698e+08	1.05346e+08
High	High	IsMasterProtein	Q9Y6D9	Mitotic spindle assembly checkpoint protein MAD1 OS=Homo sapiens GN=MAD1L1 PE=1 SV=2	0	0	53	39	329	39	1	718	83	5.92	7358	347.25	37	20	0	1.379e+08	1.49493e+08	1.54349e+08	1.49981e+08	1.53577e+08	1.63511e+08	1.57357e+08	1.68645e+08	1.61283e+08	Acetyl [N-Term]
High	High	IsMasterProtein	P55084	Trifunctional enzyme subunit beta, mitochondrial OS=Homo sapiens GN=HADHB PE=1 SV=3	0	0	62	26	519	26	1	474	51.3	9.41	11378	347.07	26	12	0	7.77012e+08	8.45051e+08	7.97012e+08	8.8146e+08	9.18136e+08	9.10924e+08	1.26215e+09	1.25686e+09	1.2319e+09
High	High	IsMasterProtein	O95714	E3 ubiquitin-protein ligase HERC2 OS=Homo sapiens GN=HERC2 PE=1 SV=2	0	0	16	55	317	55	1	4834	526.9	6.28	7155	347.07	52	25	0	4.02126e+07	4.37124e+07	4.51481e+07	4.29724e+07	4.70054e+07	4.95974e+07	5.47926e+07	6.06807e+07	5.63319e+07
High	High	IsMasterProtein	P36957	Dihydrolipoyllysine-residue succinyltransferase component of 2-oxoglutarate dehydrogenase complex, mitochondrial OS=Homo sapiens GN=DLST PE=1 SV=4	0	0	45	18	298	18	1	453	48.7	8.95	6954	347.05	16	11	0	2.89199e+08	2.86645e+08	2.91811e+08	2.6556e+08	2.68568e+08	2.72105e+08	3.33305e+08	3.49527e+08	3.33073e+08
High	High	IsMasterProtein	O76003	Glutaredoxin-3 OS=Homo sapiens GN=GLRX3 PE=1 SV=2	0	0	67	20	273	20	1	335	37.4	5.39	5449	346.9	17	14	0	4.95727e+08	5.26466e+08	5.23332e+08	4.9354e+08	5.35114e+08	5.30996e+08	5.1512e+08	5.39361e+08	4.98875e+08	Acetyl [N-Term]
High	High	None	P54652	Heat shock-related 70 kDa protein 2 OS=Homo sapiens GN=HSPA2 PE=1 SV=1	0	0	16	11	554	7	1	639	70	5.74	16195	346.83	11	6	0	7.60904e+09	8.23663e+09	8.54829e+09	7.99235e+09	8.30817e+09	8.29291e+09	9.0924e+09	1.02909e+10	9.7786e+09
High	High	IsMasterProtein	Q6IAA8	Ragulator complex protein LAMTOR1 OS=Homo sapiens GN=LAMTOR1 PE=1 SV=2	0	0	75	8	188	8	1	161	17.7	5.15	4285	346.7	8	7	0	1.35147e+08	1.3191e+08	1.40882e+08	1.395e+08	1.48036e+08	1.3843e+08	1.74533e+08	1.72909e+08	1.7879e+08
High	High	IsMasterProtein	O60502	Protein O-GlcNAcase OS=Homo sapiens GN=MGEA5 PE=1 SV=2	0	0	52	36	338	36	1	916	102.8	4.91	7035	346.41	36	15	0	2.35514e+08	2.5876e+08	2.37971e+08	1.81216e+08	1.87013e+08	1.95547e+08	2.41286e+08	2.45843e+08	2.37893e+08
High	High	IsMasterProtein	P07205	Phosphoglycerate kinase 2 OS=Homo sapiens GN=PGK2 PE=1 SV=3	0	0	20	7	288	2	1	417	44.8	8.54	6685	346.08	6	3	0	2.17567e+06	2.6325e+06	2.54532e+06	3.20034e+06	4.00746e+06	3.39058e+06	3.9839e+06	3.93618e+06	3.83173e+06
High	High	IsMasterProtein	Q96ED9	Protein Hook homolog 2 OS=Homo sapiens GN=HOOK2 PE=1 SV=3	0	0	56	37	352	37	1	719	83.2	5.47	8004	345.92	37	18	0	1.32145e+08	1.50697e+08	1.4674e+08	1.47044e+08	1.63815e+08	1.68938e+08	2.25951e+08	2.19543e+08	2.04756e+08
High	High	IsMasterProtein	P62888	60S ribosomal protein L30 OS=Homo sapiens GN=RPL30 PE=1 SV=2	0	0	66	8	322	8	1	115	12.8	9.63	7953	345.9	8	5	0	1.57913e+09	1.67968e+09	1.76542e+09	1.80037e+09	1.81911e+09	1.97357e+09	2.13889e+09	2.29782e+09	2.10354e+09
High	High	IsMasterProtein	Q86U44	N6-adenosine-methyltransferase 70 kDa subunit OS=Homo sapiens GN=METTL3 PE=1 SV=2	0	0	55	25	302	25	1	580	64.4	6.42	6364	345.84	25	17	0	1.3051e+08	1.28557e+08	1.22112e+08	1.06535e+08	1.10575e+08	1.17965e+08	1.06678e+08	1.18888e+08	1.13895e+08	Acetyl [N-Term]
High	High	IsMasterProtein	Q96JH7	Deubiquitinating protein VCIP135 OS=Homo sapiens GN=VCPIP1 PE=1 SV=2	0	0	43	39	300	39	1	1222	134.2	7.2	7328	345.77	39	20	0	5.17443e+07	5.31645e+07	7.32197e+07	5.54645e+07	5.5876e+07	5.39881e+07	8.10376e+07	8.0318e+07	7.598e+07
High	High	IsMasterProtein	Q92793	CREB-binding protein OS=Homo sapiens GN=CREBBP PE=1 SV=3	0	0	24	46	375	26	1	2442	265.2	8.53	7402	345.68	46	20	1	3.02487e+07	3.427e+07	3.17665e+07	2.71376e+07	3.06457e+07	2.94609e+07	3.35161e+07	3.37532e+07	3.22951e+07	Acetyl [N-Term]
High	High	IsMasterProtein	A2RTX5	Probable threonine--tRNA ligase 2, cytoplasmic OS=Homo sapiens GN=TARSL2 PE=1 SV=1	0	0	50	34	326	32	1	802	92.6	6.05	8008	345.55	31	15	0	1.19675e+08	1.15754e+08	1.19173e+08	1.34425e+08	1.38963e+08	1.39285e+08	1.62093e+08	169640673	1.58085e+08	Acetyl [N-Term]
High	High	None	Q13733	Sodium/potassium-transporting ATPase subunit alpha-4 OS=Homo sapiens GN=ATP1A4 PE=1 SV=3	0	0	9	9	286	0	2	1029	114.1	6.64	7236	345.46	9	3	0	6.1102e+08	6.16423e+08	6.22996e+08	6.51536e+08	6.31166e+08	6.88882e+08	8.59235e+08	8.81941e+08	8.09533e+08
High	High	IsMasterProtein	O60884	DnaJ homolog subfamily A member 2 OS=Homo sapiens GN=DNAJA2 PE=1 SV=1	0	0	60	19	318	19	1	412	45.7	6.48	7215	345.08	18	9	0	4.79741e+08	5.17068e+08	5.00017e+08	5.09794e+08	5.08705e+08	5.31541e+08	5.69271e+08	5.89412e+08	5.61e+08
High	High	IsMasterProtein	P09661	U2 small nuclear ribonucleoprotein A' OS=Homo sapiens GN=SNRPA1 PE=1 SV=2	0	0	58	16	326	16	1	255	28.4	8.62	6566	344.34	16	7	0	3.08444e+08	3.03524e+08	3.17571e+08	3.50931e+08	3.23783e+08	3.645e+08	3.23673e+08	3.41727e+08	3.40089e+08
High	High	IsMasterProtein	Q9BUQ8	Probable ATP-dependent RNA helicase DDX23 OS=Homo sapiens GN=DDX23 PE=1 SV=3	0	0	49	43	459	43	1	820	95.5	9.55	10095	344.32	43	22	0	3.43372e+08	3.41221e+08	3.4454e+08	3.3005e+08	3.51853e+08	3.58978e+08	4.19855e+08	4.12592e+08	4.07879e+08
High	High	IsMasterProtein	Q14137	Ribosome biogenesis protein BOP1 OS=Homo sapiens GN=BOP1 PE=1 SV=2	0	0	52	28	288	28	1	746	83.6	6.19	6300	344.15	27	15	0	2.67521e+08	2.76071e+08	2.66152e+08	2.50852e+08	2.65056e+08	2.71552e+08	2.97828e+08	3.09552e+08	2.83031e+08
High	High	IsMasterProtein	Q71RC2	La-related protein 4 OS=Homo sapiens GN=LARP4 PE=1 SV=3	0	0	52	29	405	29	1	724	80.5	6.61	9430	344.14	29	20	0	2.8388e+08	2.76821e+08	2.88521e+08	2.73902e+08	2.84261e+08	3.00125e+08	3.43407e+08	3.35327e+08	3.22554e+08	Acetyl [N-Term]
High	High	IsMasterProtein	P46087	Probable 28S rRNA (cytosine(4447)-C(5))-methyltransferase OS=Homo sapiens GN=NOP2 PE=1 SV=2	0	0	47	32	397	32	1	812	89.2	9.23	9386	344.11	32	14	0	3.54325e+08	3.77772e+08	3.78208e+08	3.74527e+08	4.006e+08	3.99504e+08	5.06513e+08	5.06687e+08	4.9554e+08
High	High	IsMasterProtein	Q96QR8	Transcriptional activator protein Pur-beta OS=Homo sapiens GN=PURB PE=1 SV=3	0	0	63	14	258	13	1	312	33.2	5.43	6359	344.04	14	8	0	1.4275e+08	1.60526e+08	1.41386e+08	1.41219e+08	1.46138e+08	1.41524e+08	1.55973e+08	1.50613e+08	1.48635e+08	Acetyl [N-Term; N-Term]
High	High	IsMasterProtein	Q13619	Cullin-4A OS=Homo sapiens GN=CUL4A PE=1 SV=3	0	0	52	44	522	29	1	759	87.6	8.13	13436	344.01	43	15	0	3.40522e+08	3.53946e+08	3.39173e+08	3.48953e+08	3.6584e+08	3.82972e+08	4.20842e+08	4.42743e+08	4.2668e+08
High	High	IsMasterProtein	Q5JSH3	WD repeat-containing protein 44 OS=Homo sapiens GN=WDR44 PE=1 SV=1	0	0	52	39	377	39	1	913	101.3	5.45	8810	343.96	38	22	0	1.77496e+08	1.79696e+08	1.81602e+08	2.01899e+08	2.05087e+08	2.07486e+08	2.27253e+08	2.28768e+08	2.19122e+08
High	High	IsMasterProtein	Q96CS3	FAS-associated factor 2 OS=Homo sapiens GN=FAF2 PE=1 SV=2	0	0	54	23	283	23	1	445	52.6	5.62	6594	343.74	23	11	0	1.98434e+08	1.84883e+08	2.07029e+08	2.18285e+08	2.31104e+08	2.33977e+08	3.17632e+08	3.49055e+08	3.30751e+08	Acetyl [N-Term]
High	High	IsMasterProtein	Q9H9E3	Conserved oligomeric Golgi complex subunit 4 OS=Homo sapiens GN=COG4 PE=1 SV=3	0	0	47	30	339	30	1	785	89	5.19	8019	343.58	30	15	0	2.05273e+08	2.08594e+08	2.09384e+08	2.00203e+08	1.99881e+08	2.1562e+08	2.42855e+08	2.39474e+08	2.50871e+08
High	High	IsMasterProtein	P35269	General transcription factor IIF subunit 1 OS=Homo sapiens GN=GTF2F1 PE=1 SV=2	0	0	38	24	392	24	1	517	58.2	7.49	10206	342.84	24	12	0	2.31003e+08	2.32023e+08	2.38901e+08	2.423e+08	2.3418e+08	2.459e+08	2.76049e+08	2.78043e+08	2.65758e+08	Acetyl [N-Term]
High	High	IsMasterProtein	Q9UGV2	Protein NDRG3 OS=Homo sapiens GN=NDRG3 PE=1 SV=2	0	0	66	18	267	18	1	375	41.4	5.31	6888	342.76	18	14	0	1.90423e+08	1.76863e+08	1.95325e+08	2.29414e+08	2.30524e+08	2.3999e+08	2.74808e+08	3.15922e+08	2.82748e+08	Acetyl [N-Term]
High	High	IsMasterProtein	Q9H1E3	Nuclear ubiquitous casein and cyclin-dependent kinase substrate 1 OS=Homo sapiens GN=NUCKS1 PE=1 SV=1	0	0	42	12	362	12	1	243	27.3	5.08	10167	342.4	12	6	0	2.68967e+08	3.68053e+08	3.5144e+08	3.10958e+08	4.24988e+08	3.07303e+08	3.98577e+08	4.94946e+08	3.77319e+08
High	High	IsMasterProtein	O43432	Eukaryotic translation initiation factor 4 gamma 3 OS=Homo sapiens GN=EIF4G3 PE=1 SV=2	0	0	40	57	647	51	1	1585	176.5	5.38	15278	341.92	57	20	0	1.55445e+08	1.60002e+08	1.63512e+08	1.68683e+08	1.67091e+08	1.78379e+08	2.46347e+08	2.43372e+08	2.37423e+08
High	High	IsMasterProtein	Q9NZT2	Opioid growth factor receptor OS=Homo sapiens GN=OGFR PE=1 SV=3	0	0	45	25	318	25	1	677	73.3	4.84	8839	341.61	25	13	0	109773590	1.10414e+08	1.08311e+08	1.21937e+08	1.10472e+08	1.21906e+08	1.46324e+08	1.43148e+08	1.39024e+08
High	High	IsMasterProtein	Q14692	Ribosome biogenesis protein BMS1 homolog OS=Homo sapiens GN=BMS1 PE=1 SV=1	0	0	39	45	471	45	1	1282	145.7	6.44	11947	341.53	44	17	0	2.2009e+08	2.23992e+08	2.21478e+08	2.23281e+08	2.21133e+08	2.30703e+08	2.56987e+08	2.684e+08	2.64588e+08
High	High	IsMasterProtein	Q92614	Unconventional myosin-XVIIIa OS=Homo sapiens GN=MYO18A PE=1 SV=3	0	0	39	62	361	62	1	2054	233	6.3	8833	341.46	59	24	0	8.98495e+07	9.13714e+07	8.58319e+07	8.01326e+07	7.87625e+07	8.61903e+07	1.13187e+08	1.14119e+08	1.08189e+08
High	High	IsMasterProtein	Q8TD19	Serine/threonine-protein kinase Nek9 OS=Homo sapiens GN=NEK9 PE=1 SV=2	0	0	51	38	376	38	1	979	107.1	5.74	9411	341.05	36	16	0	2.37031e+08	2.50668e+08	2.48553e+08	2.49395e+08	2.51348e+08	2.5317e+08	2.79775e+08	2.73748e+08	2.62361e+08
High	High	IsMasterProtein	Q5T5P2	Sickle tail protein homolog OS=Homo sapiens GN=KIAA1217 PE=1 SV=2	0	0	37	57	392	57	1	1943	214	7.06	9444	340.92	53	27	0	1.02372e+08	1.0677e+08	1.01055e+08	1.03837e+08	1.08211e+08	1.07895e+08	1.25391e+08	1.17782e+08	1.13321e+08
High	High	None	Q93084	Sarcoplasmic/endoplasmic reticulum calcium ATPase 3 OS=Homo sapiens GN=ATP2A3 PE=1 SV=2	0	0	8	8	273	8	1	1043	113.9	5.57	6987	340.54	8	5	0	3.00306e+08	2.99858e+08	2.87909e+08	3.1906e+08	339211339	3.49743e+08	4.43055e+08	4.39258e+08	4.14074e+08
High	High	IsMasterProtein	O43264	Centromere/kinetochore protein zw10 homolog OS=Homo sapiens GN=ZW10 PE=1 SV=3	0	0	54	33	366	33	1	779	88.8	6.27	9179	340.09	31	17	0	2.97504e+08	3.16291e+08	3.05883e+08	2.95255e+08	2.83292e+08	3.16078e+08	3.55397e+08	3.57753e+08	3.45877e+08	Acetyl [N-Term]
High	High	IsMasterProtein	O94760	N(G),N(G)-dimethylarginine dimethylaminohydrolase 1 OS=Homo sapiens GN=DDAH1 PE=1 SV=3	0	0	71	19	365	18	1	285	31.1	5.81	8730	339.93	19	8	1	4.72219e+08	4.74895e+08	4.65273e+08	5.31027e+08	5.27944e+08	5.54846e+08	5.12959e+08	5.36744e+08	4.86425e+08	Acetyl [N-Term]
High	High	IsMasterProtein	Q04837	Single-stranded DNA-binding protein, mitochondrial OS=Homo sapiens GN=SSBP1 PE=1 SV=1	0	0	56	8	238	8	1	148	17.2	9.6	5437	339.13	8	4	0	4.29371e+08	4.85656e+08	5.07951e+08	4.36313e+08	4.43273e+08	4.85778e+08	6.32951e+08	6.49239e+08	5.64605e+08
High	High	IsMasterProtein	Q6PJG6	BRCA1-associated ATM activator 1 OS=Homo sapiens GN=BRAT1 PE=1 SV=2	0	0	56	28	263	28	1	821	88.1	5.27	6067	339.13	28	16	0	1.13631e+08	1.23864e+08	1.21004e+08	1.04043e+08	1.16138e+08	1.07527e+08	1.1982e+08	1.25865e+08	1.08077e+08
High	High	IsMasterProtein	Q9BRK5	45 kDa calcium-binding protein OS=Homo sapiens GN=SDF4 PE=1 SV=1	0	0	61	18	308	18	1	362	41.8	4.86	6701	339.09	18	8	0	3.14748e+08	3.31012e+08	3.33698e+08	3.03094e+08	3.12179e+08	2.99483e+08	3.53758e+08	3.80494e+08	3.56045e+08
High	High	IsMasterProtein	Q9P0M6	Core histone macro-H2A.2 OS=Homo sapiens GN=H2AFY2 PE=1 SV=3	0	0	55	16	293	14	1	372	40	9.69	6248	339.04	15	10	0	1.71047e+08	1.75034e+08	1.65721e+08	1.70166e+08	1.80701e+08	1.75361e+08	2.02248e+08	2.00261e+08	1.9599e+08
High	High	IsMasterProtein	Q6IBS0	Twinfilin-2 OS=Homo sapiens GN=TWF2 PE=1 SV=2	0	0	61	18	205	15	1	349	39.5	6.84	4264	338.79	18	11	0	8.16864e+07	8.39905e+07	8.34756e+07	8.62712e+07	8.91913e+07	8.81795e+07	9.31864e+07	9.49058e+07	8.8131e+07	Acetyl [N-Term]
High	High	IsMasterProtein	O95235	Kinesin-like protein KIF20A OS=Homo sapiens GN=KIF20A PE=1 SV=1	0	0	51	33	285	33	1	890	100.2	6.92	7095	338.73	32	18	0	8.45652e+07	8.94387e+07	8.73361e+07	8.68625e+07	8.22401e+07	9.45654e+07	5.39868e+07	5.63858e+07	5.39128e+07
High	High	IsMasterProtein	P30837	Aldehyde dehydrogenase X, mitochondrial OS=Homo sapiens GN=ALDH1B1 PE=1 SV=3	0	0	60	28	360	24	1	517	57.2	6.8	8992	338.65	28	17	4	3.35986e+08	3.30862e+08	3.42044e+08	3.27218e+08	3.26211e+08	3.43198e+08	4.70669e+08	5.18129e+08	4.90871e+08
High	High	IsMasterProtein	Q92552	28S ribosomal protein S27, mitochondrial OS=Homo sapiens GN=MRPS27 PE=1 SV=3	0	0	48	19	299	19	1	414	47.6	6.18	6449	338.48	19	9	0	1.52808e+08	1.55477e+08	1.59053e+08	1.39674e+08	1.34872e+08	1.40477e+08	1.8796e+08	1.97933e+08	1.79253e+08
High	High	IsMasterProtein	Q13464	Rho-associated protein kinase 1 OS=Homo sapiens GN=ROCK1 PE=1 SV=1	0	0	47	62	497	57	1	1354	158.1	5.9	10635	338.44	60	22	6	2.12363e+08	2.21708e+08	2.07912e+08	2.23575e+08	2.22409e+08	2.21603e+08	2.54185e+08	2.47928e+08	2.52801e+08
High	High	IsMasterProtein	P49821	NADH dehydrogenase [ubiquinone] flavoprotein 1, mitochondrial OS=Homo sapiens GN=NDUFV1 PE=1 SV=4	0	0	67	24	295	24	1	464	50.8	8.21	5935	338.19	23	13	0	2.26554e+08	2.23223e+08	2.283e+08	2.44545e+08	2.54031e+08	2.39389e+08	3.20005e+08	3.18219e+08	2.99797e+08
High	High	IsMasterProtein	O14841	5-oxoprolinase OS=Homo sapiens GN=OPLAH PE=1 SV=3	0	0	34	32	320	32	1	1288	137.4	6.58	8089	337.78	32	15	0	1.06032e+08	1.1214e+08	1.12677e+08	1.43315e+08	1.47314e+08	1.49717e+08	1.81454e+08	1.94802e+08	1.9297e+08
High	High	IsMasterProtein	Q96HY6	DDRGK domain-containing protein 1 OS=Homo sapiens GN=DDRGK1 PE=1 SV=2	0	0	51	14	287	14	1	314	35.6	5.12	7348	337.59	14	8	0	6.75257e+07	6.69423e+07	6.6617e+07	7.63006e+07	7.64802e+07	7.65531e+07	9.18104e+07	8.48366e+07	9.4883e+07
High	High	IsMasterProtein	Q96GA7	Serine dehydratase-like OS=Homo sapiens GN=SDSL PE=1 SV=1	0	0	53	12	238	12	1	329	34.7	6.89	6798	336.77	12	6	0	1.16115e+08	1.13339e+08	1.18362e+08	1.2787e+08	1.28568e+08	1.32212e+08	1.74901e+08	1.79173e+08	1.67047e+08	Acetyl [N-Term]
High	High	IsMasterProtein	Q9BTT0	Acidic leucine-rich nuclear phosphoprotein 32 family member E OS=Homo sapiens GN=ANP32E PE=1 SV=1	0	0	43	8	188	8	1	268	30.7	3.85	3748	336.66	8	7	0	9.30302e+07	9.08241e+07	9.18591e+07	9.26178e+07	8.81708e+07	9.79058e+07	8.85004e+07	88329176	9.25788e+07
High	High	IsMasterProtein	Q15276	Rab GTPase-binding effector protein 1 OS=Homo sapiens GN=RABEP1 PE=1 SV=2	0	0	50	39	341	39	1	862	99.2	5.01	7398	336.66	39	22	0	1.11005e+08	1.16008e+08	1.2533e+08	1.19345e+08	1.26877e+08	1.26705e+08	1.77322e+08	1.88639e+08	1.75115e+08	Acetyl [N-Term]
High	High	IsMasterProtein	Q5TFE4	5'-nucleotidase domain-containing protein 1 OS=Homo sapiens GN=NT5DC1 PE=1 SV=1	0	0	61	26	376	26	1	455	51.8	6.35	8374	336.22	26	12	0	3.4133e+08	3.70897e+08	3.74972e+08	3.61493e+08	4.01295e+08	4.04936e+08	4.25635e+08	4.41368e+08	4.33791e+08	Acetyl [N-Term]
High	High	IsMasterProtein	O00499	Myc box-dependent-interacting protein 1 OS=Homo sapiens GN=BIN1 PE=1 SV=1	0	0	47	21	265	21	1	593	64.7	5.06	5573	336.13	21	14	0	1.60514e+08	1.78744e+08	1.835e+08	1.69899e+08	1.70671e+08	1.64343e+08	2.10462e+08	2.17084e+08	2.25344e+08
High	High	IsMasterProtein	Q04917	14-3-3 protein eta OS=Homo sapiens GN=YWHAH PE=1 SV=4	0	0	64	18	576	14	1	246	28.2	4.84	13255	336.11	18	8	0	7.02086e+08	7.233e+08	7.12519e+08	6.88348e+08	6.96845e+08	7.15911e+08	7.19548e+08	7.57751e+08	6.99614e+08	Acetyl [N-Term]
High	High	IsMasterProtein	P42356	Phosphatidylinositol 4-kinase alpha OS=Homo sapiens GN=PI4KA PE=1 SV=4	0	0	30	52	351	52	1	2102	236.7	7.06	8724	335.96	50	19	0	7.91558e+07	8.30209e+07	8.49169e+07	8.3774e+07	8.84642e+07	8.73738e+07	8.47197e+07	8.62156e+07	8.10176e+07
High	High	IsMasterProtein	Q99567	Nuclear pore complex protein Nup88 OS=Homo sapiens GN=NUP88 PE=1 SV=2	0	0	43	29	325	29	1	741	83.5	5.69	7672	335.89	28	15	0	1.59859e+08	1.51605e+08	1.49946e+08	1.69227e+08	1.67984e+08	1.65701e+08	1.78148e+08	1.88835e+08	1.73222e+08
High	High	IsMasterProteinRejected	Q12840	Kinesin heavy chain isoform 5A OS=Homo sapiens GN=KIF5A PE=1 SV=2	0	0	14	15	291	0	0	1032	117.3	5.9	6473	335.77	15	8	0
High	High	IsMasterProtein	O76031	ATP-dependent Clp protease ATP-binding subunit clpX-like, mitochondrial OS=Homo sapiens GN=CLPX PE=1 SV=2	0	0	54	29	350	29	1	633	69.2	7.58	7520	335.74	29	19	0	2.81363e+08	2.96298e+08	2.78617e+08	2.37923e+08	2.44935e+08	2.42092e+08	3.78036e+08	3.65775e+08	3.7088e+08
High	High	IsMasterProtein	O14929	Histone acetyltransferase type B catalytic subunit OS=Homo sapiens GN=HAT1 PE=1 SV=1	0	0	43	13	334	13	1	419	49.5	5.69	9091	335.28	13	9	0	3.97719e+08	4.01103e+08	4.33596e+08	3.84484e+08	3.78034e+08	3.96245e+08	3.43382e+08	3.81526e+08	3.5256e+08	Acetyl [N-Term]
High	High	IsMasterProtein	Q96KQ7	Histone-lysine N-methyltransferase EHMT2 OS=Homo sapiens GN=EHMT2 PE=1 SV=3	0	0	40	32	334	31	1	1210	132.3	5.45	7776	335.16	30	17	0	9.16499e+07	1.04419e+08	1.06679e+08	9.1984e+07	9.8943e+07	9.9593e+07	1.08325e+08	1.14727e+08	1.0731e+08	Acetyl [N-Term]
High	High	IsMasterProtein	Q16836	Hydroxyacyl-coenzyme A dehydrogenase, mitochondrial OS=Homo sapiens GN=HADH PE=1 SV=3	0	0	50	11	243	11	1	314	34.3	8.85	5429	334.79	11	5	0	3.58454e+08	3.499e+08	3.61993e+08	3.40654e+08	3.33293e+08	3.28609e+08	4.36985e+08	4.67944e+08	4.40483e+08
High	High	IsMasterProtein	Q9UN86	Ras GTPase-activating protein-binding protein 2 OS=Homo sapiens GN=G3BP2 PE=1 SV=2	0	0	50	21	334	19	1	482	54.1	5.55	6757	334.6	21	11	0	5.98582e+08	6.35802e+08	6.36063e+08	5.30173e+08	5.54872e+08	5.45651e+08	5.82547e+08	6.88656e+08	5.84765e+08
High	High	IsMasterProtein	O15131	Importin subunit alpha-6 OS=Homo sapiens GN=KPNA5 PE=1 SV=2	0	0	31	15	242	3	1	536	60.3	5.16	5301	334.6	15	10	0	1.94549e+06	2.26112e+06	2.12859e+06	1.8359e+06	1.71747e+06	1.91088e+06	1.71493e+06	1.90376e+06	1.5244e+06
High	High	IsMasterProtein	P60983	Glia maturation factor beta OS=Homo sapiens GN=GMFB PE=1 SV=2	0	0	75	13	235	13	1	142	16.7	5.29	5311	334.56	13	8	0	2.91247e+08	2.80377e+08	2.84303e+08	2.97134e+08	2.94107e+08	3.13369e+08	4.10593e+08	3.86567e+08	4.01879e+08	Acetyl [N-Term]
High	High	IsMasterProtein	Q7Z3J2	UPF0505 protein C16orf62 OS=Homo sapiens GN=C16orf62 PE=1 SV=2	0	0	46	33	298	33	1	963	109.5	7.21	6952	334.19	29	18	0	8.14296e+07	8.4664e+07	8.58317e+07	8.08515e+07	8.53085e+07	8.93005e+07	9.87767e+07	1.00338e+08	8.78539e+07
High	High	IsMasterProtein	O75976	Carboxypeptidase D OS=Homo sapiens GN=CPD PE=1 SV=2	0	0	29	34	300	34	1	1380	152.8	6.05	7384	333.61	34	13	0	7.79407e+07	8.34316e+07	8.16272e+07	7.82796e+07	7.94445e+07	8.38374e+07	7.1874e+07	7.60023e+07	6.78254e+07
High	High	IsMasterProtein	P17812	CTP synthase 1 OS=Homo sapiens GN=CTPS1 PE=1 SV=2	0	0	58	29	436	25	1	591	66.6	6.46	10324	333.18	29	13	0	4.96899e+08	4.88282e+08	5.09005e+08	4.61525e+08	4.7076e+08	4.63332e+08	5.56363e+08	5.88711e+08	5.49561e+08
High	High	IsMasterProtein	P18621	60S ribosomal protein L17 OS=Homo sapiens GN=RPL17 PE=1 SV=3	0	0	51	11	325	11	1	184	21.4	10.17	6840	333.04	11	5	0	1.33607e+09	1.26925e+09	1.39193e+09	1.31586e+09	1.39985e+09	1.39544e+09	1.71594e+09	1.82509e+09	1.67928e+09
High	High	IsMasterProtein	P49916	DNA ligase 3 OS=Homo sapiens GN=LIG3 PE=1 SV=2	0	0	45	40	358	40	1	1009	112.8	9.01	8323	332.88	40	18	0	199993361	2.12789e+08	2.04683e+08	2.06466e+08	2.08548e+08	2.14307e+08	2.04581e+08	2.1951e+08	2.04203e+08
High	High	IsMasterProtein	Q9BX40	Protein LSM14 homolog B OS=Homo sapiens GN=LSM14B PE=1 SV=1	0	0	55	15	233	15	1	385	42	9.69	5883	332.08	15	8	0	8.95917e+07	8.97101e+07	9.16724e+07	8.86273e+07	9.48649e+07	1.01423e+08	1.199e+08	1.14205e+08	1.101e+08	Acetyl [N-Term]
High	High	IsMasterProtein	Q9NVX2	Notchless protein homolog 1 OS=Homo sapiens GN=NLE1 PE=1 SV=4	0	0	53	17	304	17	1	485	53.3	7.34	6989	331.87	17	11	0	1.88722e+08	2.15527e+08	2.08555e+08	2.03877e+08	2.08054e+08	2.01492e+08	2.24192e+08	2.25728e+08	2.16082e+08
High	High	IsMasterProtein	Q96G03	Phosphoglucomutase-2 OS=Homo sapiens GN=PGM2 PE=1 SV=4	0	0	54	32	427	32	1	612	68.2	6.73	10085	331.85	32	13	0	1.77313e+09	1.6559e+09	1.98277e+09	1.29989e+09	1.43175e+09	1.30022e+09	1.52933e+09	1.5736e+09	1.35467e+09	Acetyl [N-Term]
High	High	IsMasterProtein	Q01130	Serine/arginine-rich splicing factor 2 OS=Homo sapiens GN=SRSF2 PE=1 SV=4	0	0	35	9	393	7	1	221	25.5	11.85	12379	331.78	9	3	2	1.0039e+09	1.12274e+09	1.16526e+09	1.0289e+09	1.04253e+09	1.10921e+09	1.21733e+09	1.29006e+09	1.08751e+09	Acetyl [N-Term]
High	High	IsMasterProtein	Q15691	Microtubule-associated protein RP/EB family member 1 OS=Homo sapiens GN=MAPRE1 PE=1 SV=3	0	0	70	17	314	14	1	268	30	5.14	7864	331.72	17	10	3	6.24549e+08	6.42386e+08	6.81653e+08	6.88297e+08	7.25874e+08	7.46947e+08	8.28065e+08	8.22781e+08	8.52549e+08	Acetyl [N-Term]
High	High	IsMasterProtein	Q9H6T3	RNA polymerase II-associated protein 3 OS=Homo sapiens GN=RPAP3 PE=1 SV=2	0	0	50	32	360	32	1	665	75.7	6.84	8991	331.71	30	18	0	1.79694e+08	1.91574e+08	2.04262e+08	1.85503e+08	1.99901e+08	1.99573e+08	2.21444e+08	2.36938e+08	2.07469e+08
High	High	IsMasterProtein	O43719	HIV Tat-specific factor 1 OS=Homo sapiens GN=HTATSF1 PE=1 SV=1	0	0	58	42	425	42	1	755	85.8	4.4	10278	331.53	42	13	0	1.61999e+08	1.79289e+08	1.84387e+08	1.93703e+08	1.96263e+08	2.18802e+08	2.27234e+08	2.53067e+08	2.43545e+08	Acetyl [N-Term]
High	High	IsMasterProtein	P23284	Peptidyl-prolyl cis-trans isomerase B OS=Homo sapiens GN=PPIB PE=1 SV=2	0	0	57	17	468	17	1	216	23.7	9.41	11252	331.21	16	9	0	3.87436e+09	3.77898e+09	3.74035e+09	4.46145e+09	4.69012e+09	4.66963e+09	4.78911e+09	4.68893e+09	4.74117e+09
High	High	IsMasterProtein	Q15008	26S proteasome non-ATPase regulatory subunit 6 OS=Homo sapiens GN=PSMD6 PE=1 SV=1	0	0	61	27	501	27	1	389	45.5	5.62	11674	331.04	27	10	0	1.10224e+09	1.13155e+09	1.06785e+09	1.17259e+09	1.11395e+09	1.16793e+09	1.31678e+09	1.33321e+09	1.22677e+09
High	High	IsMasterProtein	Q92609	TBC1 domain family member 5 OS=Homo sapiens GN=TBC1D5 PE=1 SV=1	0	0	48	25	258	25	1	795	88.9	6.54	5642	330.9	25	19	0	9.94845e+07	9.81843e+07	9.76592e+07	8.94225e+07	9.69696e+07	9.54127e+07	4.33245e+07	4.12423e+07	4.45858e+07	Acetyl [N-Term]
High	High	IsMasterProtein	O15230	Laminin subunit alpha-5 OS=Homo sapiens GN=LAMA5 PE=1 SV=8	0	0	26	65	383	64	1	3695	399.5	7.02	8705	330.89	64	30	1	5.95506e+07	6.5879e+07	6.43748e+07	7.85248e+07	7.66832e+07	8.16059e+07	8.68906e+07	8.24325e+07	7.97628e+07
High	High	IsMasterProtein	P10275	Androgen receptor OS=Homo sapiens GN=AR PE=1 SV=3	0	0	43	29	313	29	1	920	99.1	6.42	7918	330.82	29	14	0	1.10059e+08	1.07084e+08	1.10427e+08	1.2626e+08	1.30537e+08	1.27252e+08	1.43047e+08	1.43707e+08	1.37266e+08	Acetyl [N-Term]
High	High	IsMasterProtein	O00116	Alkyldihydroxyacetonephosphate synthase, peroxisomal OS=Homo sapiens GN=AGPS PE=1 SV=1	0	0	52	25	238	25	1	658	72.9	7.34	4803	330.21	25	14	0	6.44596e+07	6.93981e+07	6.61845e+07	6.32454e+07	6.70365e+07	6.56676e+07	1.09181e+08	1.05192e+08	1.04987e+08
High	High	IsMasterProtein	O00505	Importin subunit alpha-4 OS=Homo sapiens GN=KPNA3 PE=1 SV=2	0	0	46	18	239	12	1	521	57.8	4.94	4576	329.99	18	11	5	1.47322e+08	1.36753e+08	1.45971e+08	1.64705e+08	1.43202e+08	1.37882e+08	1.79982e+08	1.50616e+08	1.67302e+08	Acetyl [N-Term]
High	High	IsMasterProtein	P50748	Kinetochore-associated protein 1 OS=Homo sapiens GN=KNTC1 PE=1 SV=1	0	0	29	57	388	57	1	2209	250.6	5.97	8516	329.71	55	23	0	2.0985e+08	2.11109e+08	2.09079e+08	1.8788e+08	1.95784e+08	1.9007e+08	1.71006e+08	1.75453e+08	1.69172e+08
High	High	None	A5A3E0	POTE ankyrin domain family member F OS=Homo sapiens GN=POTEF PE=1 SV=2	0	0	8	10	770	0	0	1075	121.4	6.2	19450	329.55	10	4	0
High	High	IsMasterProtein	P50995	Annexin A11 OS=Homo sapiens GN=ANXA11 PE=1 SV=1	0	0	40	22	323	22	1	505	54.4	7.65	8284	328.98	22	9	0	6.40459e+08	6.53846e+08	6.46732e+08	7.08317e+08	6.9209e+08	6.82776e+08	8.52366e+08	8.72996e+08	8.77282e+08
High	High	IsMasterProtein	P33316	Deoxyuridine 5'-triphosphate nucleotidohydrolase, mitochondrial OS=Homo sapiens GN=DUT PE=1 SV=4	0	0	54	14	266	14	1	252	26.5	9.36	6025	328.78	14	9	0	6.12028e+08	6.33005e+08	6.64648e+08	4.30262e+08	4.77653e+08	5.16715e+08	3.6035e+08	3.68129e+08	3.39105e+08
High	High	IsMasterProtein	Q5TDH0	Protein DDI1 homolog 2 OS=Homo sapiens GN=DDI2 PE=1 SV=1	0	0	57	17	208	17	1	399	44.5	5.05	3862	328.54	17	11	0	1.56432e+08	1.6235e+08	1.62575e+08	1.34465e+08	1.36278e+08	1.39351e+08	1.17065e+08	1.13143e+08	1.13895e+08
High	High	IsMasterProtein	P09417	Dihydropteridine reductase OS=Homo sapiens GN=QDPR PE=1 SV=2	0	0	65	14	271	14	1	244	25.8	7.37	5965	328.5	14	9	0	1.75533e+08	1.84474e+08	1.76497e+08	2.27193e+08	2.40352e+08	2.22058e+08	2.1244e+08	2.22751e+08	2.0988e+08	Acetyl [N-Term; N-Term]
High	High	IsMasterProtein	Q6PI48	Aspartate--tRNA ligase, mitochondrial OS=Homo sapiens GN=DARS2 PE=1 SV=1	0	0	56	28	266	28	1	645	73.5	8.02	5007	328.49	28	13	0	2.88483e+08	2.85775e+08	3.00787e+08	2.96496e+08	3.09613e+08	3.01591e+08	3.57186e+08	3.63879e+08	3.42582e+08
High	High	IsMasterProtein	Q03154	Aminoacylase-1 OS=Homo sapiens GN=ACY1 PE=1 SV=1	0	0	65	20	320	20	1	408	45.9	6.18	6711	328.48	20	10	0	3.8204e+08	4.17989e+08	4.31949e+08	4.53421e+08	4.47952e+08	4.47173e+08	6.09279e+08	5.96677e+08	5.84415e+08
High	High	IsMasterProtein	Q08945	FACT complex subunit SSRP1 OS=Homo sapiens GN=SSRP1 PE=1 SV=1	0	0	47	30	379	30	1	709	81	6.87	8413	328	30	13	0	5.30734e+08	5.342e+08	5.57672e+08	5.60493e+08	6.06538e+08	6.03219e+08	5.23223e+08	5.64189e+08	5.22948e+08	Acetyl [N-Term]
High	High	IsMasterProtein	Q14677	Clathrin interactor 1 OS=Homo sapiens GN=CLINT1 PE=1 SV=1	0	0	31	19	346	19	1	625	68.2	6.42	7910	327.87	19	13	0	2.79818e+08	2.8185e+08	3.08212e+08	3.23345e+08	3.33211e+08	3.59556e+08	4.09301e+08	4.31305e+08	3.88942e+08
High	High	IsMasterProtein	P14735	Insulin-degrading enzyme OS=Homo sapiens GN=IDE PE=1 SV=4	0	0	51	45	475	45	1	1019	117.9	6.61	9890	327.38	45	20	0	5.43182e+08	6.01445e+08	5.82279e+08	5.41508e+08	5.67017e+08	5.99034e+08	6.62283e+08	6.75886e+08	7.01221e+08
High	High	IsMasterProtein	P22694	cAMP-dependent protein kinase catalytic subunit beta OS=Homo sapiens GN=PRKACB PE=1 SV=2	0	0	56	19	317	9	1	351	40.6	8.78	7263	327.02	19	14	11	3.18297e+08	3.48837e+08	3.45114e+08	3.32731e+08	3.78201e+08	3.26845e+08	3.59708e+08	3.8324e+08	3.42557e+08
High	High	IsMasterProtein	Q9UHD2	Serine/threonine-protein kinase TBK1 OS=Homo sapiens GN=TBK1 PE=1 SV=1	0	0	47	27	283	25	1	729	83.6	6.79	6663	326.55	27	12	2	9.88081e+07	9.82707e+07	1.00663e+08	1.0621e+08	1.03085e+08	1.13189e+08	1.29487e+08	1.26712e+08	1.27901e+08
High	High	IsMasterProtein	Q96SB4	SRSF protein kinase 1 OS=Homo sapiens GN=SRPK1 PE=1 SV=2	0	0	42	26	356	22	1	655	74.3	6.16	8321	326.35	26	15	4	2.78296e+08	3.00357e+08	3.15383e+08	2.46702e+08	2.71734e+08	2.62221e+08	2.91146e+08	3.17203e+08	2.78066e+08
High	High	None	Q9BYX7	Putative beta-actin-like protein 3 OS=Homo sapiens GN=POTEKP PE=5 SV=1	0	0	11	4	585	0	2	375	42	6.33	13818	326.3	4	3	0	7.2283e+09	7.29434e+09	6.54028e+09	7.39071e+09	7.84617e+09	6.2622e+09	7.90238e+09	7.73101e+09	7.44142e+09
High	High	IsMasterProtein	Q9HBR0	Putative sodium-coupled neutral amino acid transporter 10 OS=Homo sapiens GN=SLC38A10 PE=1 SV=2	0	0	43	42	264	42	1	1119	119.7	5.73	6092	326.3	38	19	0	7.44355e+07	7.06355e+07	6.80813e+07	5.93714e+07	6.23843e+07	5.86936e+07	6.96217e+07	7.37109e+07	7.24521e+07
High	High	IsMasterProtein	P62318	Small nuclear ribonucleoprotein Sm D3 OS=Homo sapiens GN=SNRPD3 PE=1 SV=1	0	0	48	4	257	4	1	126	13.9	10.32	7370	326.08	4	3	0	8.09408e+08	8.0349e+08	8.68505e+08	7.62667e+08	8.32559e+08	7.5177e+08	8.45317e+08	9.4167e+08	8.32316e+08
High	High	IsMasterProtein	P40222	Alpha-taxilin OS=Homo sapiens GN=TXLNA PE=1 SV=3	0	0	69	43	457	42	1	546	61.9	6.52	10545	325.71	42	16	1	5.51589e+08	5.83334e+08	5.48826e+08	5.60012e+08	5.76757e+08	5.81471e+08	6.76952e+08	6.96308e+08	6.36237e+08
High	High	IsMasterProtein	O60826	Coiled-coil domain-containing protein 22 OS=Homo sapiens GN=CCDC22 PE=1 SV=1	0	0	62	32	296	31	1	627	70.7	6.74	5860	325.34	31	19	0	9.73409e+07	9.72027e+07	1.0048e+08	9.74608e+07	1.01835e+08	1.01553e+08	1.11787e+08	1.17096e+08	1.11504e+08
High	High	IsMasterProtein	O00754	Lysosomal alpha-mannosidase OS=Homo sapiens GN=MAN2B1 PE=1 SV=3	0	0	35	28	275	28	1	1011	113.7	7.28	5643	325.29	28	16	0	2.13073e+08	2.19778e+08	2.23992e+08	2.20906e+08	2.3656e+08	2.38755e+08	2.88278e+08	2.96753e+08	2.77074e+08
High	High	IsMasterProtein	Q0VDF9	Heat shock 70 kDa protein 14 OS=Homo sapiens GN=HSPA14 PE=1 SV=1	0	0	58	25	276	25	1	509	54.8	5.59	5820	325.22	23	13	0	1.49231e+08	1.52224e+08	1.49242e+08	1.43047e+08	1.41642e+08	1.51854e+08	1.77988e+08	1.82245e+08	1.7132e+08
High	High	IsMasterProtein	Q96GS4	BLOC-1-related complex subunit 6 OS=Homo sapiens GN=BORCS6 PE=1 SV=2	0	0	79	19	200	18	1	357	37.2	5.76	5420	324.92	19	13	1	3.85362e+07	3.6447e+07	3.5286e+07	44368879	4.63339e+07	4.66815e+07	5.80371e+07	6.07121e+07	5.48749e+07
n/a	High	IsMasterProtein	P49454	Centromere protein F OS=Homo sapiens GN=CENPF PE=1 SV=2		0	17	36	91	54	1	3210	367.5	5.07		324.62		36	0	5.29937e+07	5.42246e+07	5.30171e+07	4.96156e+07	5.12005e+07	5.19346e+07	5.16186e+07	4.81263e+07	4.91834e+07
High	High	IsMasterProtein	P16930	Fumarylacetoacetase OS=Homo sapiens GN=FAH PE=1 SV=2	0	0	61	17	275	17	1	419	46.3	6.95	6131	324.41	17	11	0	2.329e+08	2.33924e+08	2.51927e+08	2.32918e+08	2.81489e+08	2.5066e+08	3.31002e+08	3.70327e+08	3.19502e+08	Acetyl [N-Term]
High	High	IsMasterProtein	O00273	DNA fragmentation factor subunit alpha OS=Homo sapiens GN=DFFA PE=1 SV=1	0	0	61	16	265	16	1	331	36.5	4.79	5978	323.91	16	8	0	3.17665e+08	2.95149e+08	3.02797e+08	3.30891e+08	3.35981e+08	3.293e+08	3.70079e+08	3.79238e+08	3.72909e+08	Acetyl [N-Term]
High	High	IsMasterProtein	Q96B70	Leukocyte receptor cluster member 9 OS=Homo sapiens GN=LENG9 PE=2 SV=2	0	0	64	19	198	19	1	501	53.1	7.84	3789	323.85	18	14	0	5.49427e+07	6.04014e+07	5.4421e+07	5.8263e+07	5.47239e+07	6.55791e+07	8.06527e+07	7.95093e+07	74361042	Acetyl [N-Term]
High	High	IsMasterProtein	O75410	Transforming acidic coiled-coil-containing protein 1 OS=Homo sapiens GN=TACC1 PE=1 SV=2	0	0	53	34	319	31	1	805	87.7	4.88	7211	323.84	34	13	0	7.67719e+07	8.03812e+07	7.57389e+07	9.06017e+07	1.03767e+08	9.87223e+07	1.17911e+08	1.09693e+08	1.07599e+08
High	High	IsMasterProtein	Q8IYB3	Serine/arginine repetitive matrix protein 1 OS=Homo sapiens GN=SRRM1 PE=1 SV=2	0	0	17	16	276	16	1	904	102.3	11.84	6901	323.81	16	9	0	2.07411e+08	2.14888e+08	2.21548e+08	2.35323e+08	2.30695e+08	2.36392e+08	2.38208e+08	2.47303e+08	2.59745e+08	Acetyl [N-Term]
High	High	IsMasterProtein	Q8NB90	Spermatogenesis-associated protein 5 OS=Homo sapiens GN=SPATA5 PE=1 SV=3	0	0	54	32	323	31	1	893	97.8	5.66	7423	323.77	32	15	0	1.00049e+08	1.05907e+08	1.00439e+08	9.65706e+07	9.89062e+07	9.72491e+07	1.01565e+08	1.07285e+08	1.03465e+08
High	High	IsMasterProtein	P31350	Ribonucleoside-diphosphate reductase subunit M2 OS=Homo sapiens GN=RRM2 PE=1 SV=1	0	0	57	21	308	17	1	389	44.8	5.38	6890	323.77	21	11	4	2.6581e+08	2.64483e+08	2.65529e+08	3.24725e+08	3.31266e+08	3.40117e+08	3.21179e+08	3.4478e+08	3.23216e+08
High	High	IsMasterProtein	Q16740	ATP-dependent Clp protease proteolytic subunit, mitochondrial OS=Homo sapiens GN=CLPP PE=1 SV=1	0	0	37	10	219	10	1	277	30.2	8.09	4967	323.75	10	5	0	1.82133e+08	1.77711e+08	1.91881e+08	1.66458e+08	1.68692e+08	1.86957e+08	2.19803e+08	2.29307e+08	2.3556e+08
High	High	IsMasterProtein	Q8WVV9	Heterogeneous nuclear ribonucleoprotein L-like OS=Homo sapiens GN=HNRNPLL PE=1 SV=1	0	0	70	28	313	27	1	542	60	7.72	6430	323.66	27	14	0	1.72526e+08	1.77258e+08	1.79242e+08	1.68267e+08	1.73108e+08	1.71305e+08	1.43286e+08	1.5168e+08	1.46063e+08
High	High	IsMasterProtein	O95861	3'(2'),5'-bisphosphate nucleotidase 1 OS=Homo sapiens GN=BPNT1 PE=1 SV=1	0	0	64	19	325	19	1	308	33.4	5.69	8017	323.39	19	12	0	5.12982e+08	5.44269e+08	5.24728e+08	5.51972e+08	5.26512e+08	5.80376e+08	5.0265e+08	5.38653e+08	5.036e+08	Acetyl [N-Term]
High	High	IsMasterProtein	Q9Y6N5	Sulfide:quinone oxidoreductase, mitochondrial OS=Homo sapiens GN=SQRDL PE=1 SV=1	0	0	58	23	269	23	1	450	49.9	9.11	6112	323.01	22	13	0	2.03984e+08	2.25257e+08	2.21207e+08	2.14175e+08	2.1507e+08	2.29824e+08	2.88503e+08	3.04646e+08	2.86761e+08
High	High	IsMasterProtein	Q9Y3P9	Rab GTPase-activating protein 1 OS=Homo sapiens GN=RABGAP1 PE=1 SV=3	0	0	56	49	432	47	1	1069	121.7	5.25	10043	322.47	47	22	3	1.59519e+08	1.749e+08	1.64296e+08	2.02947e+08	2.09339e+08	1.94976e+08	2.7326e+08	2.88122e+08	2.67655e+08
High	High	IsMasterProtein	P55011	Solute carrier family 12 member 2 OS=Homo sapiens GN=SLC12A2 PE=1 SV=1	0	0	33	31	256	30	1	1212	131.4	6.4	5734	322.19	30	16	1	7.79179e+07	7.62548e+07	7.51102e+07	7.08215e+07	7.37029e+07	7.90134e+07	1.26041e+08	1.24562e+08	1.22123e+08	Acetyl [N-Term]
High	High	IsMasterProtein	Q13217	DnaJ homolog subfamily C member 3 OS=Homo sapiens GN=DNAJC3 PE=1 SV=1	0	0	56	21	243	21	1	504	57.5	6.15	4913	322.06	21	11	0	1.39503e+08	1.4534e+08	1.3806e+08	1.3922e+08	1.33162e+08	1.35767e+08	8.27002e+07	7.92578e+07	7.88015e+07
High	High	IsMasterProtein	Q9NNW5	WD repeat-containing protein 6 OS=Homo sapiens GN=WDR6 PE=1 SV=1	0	0	34	28	304	28	1	1121	121.6	6.87	6211	322.03	28	16	0	1.16947e+08	1.29912e+08	1.23516e+08	1.18948e+08	1.30808e+08	1.23173e+08	1.62616e+08	1.68232e+08	1.53822e+08	Acetyl [N-Term]
High	High	IsMasterProtein	P50542	Peroxisomal targeting signal 1 receptor OS=Homo sapiens GN=PEX5 PE=1 SV=3	0	0	64	28	245	28	1	639	70.8	4.54	5605	321.82	27	19	0	6.78103e+07	6.97264e+07	7.61602e+07	6.07614e+07	6.62171e+07	6.29203e+07	6.03165e+07	6.38117e+07	6.75616e+07
High	High	IsMasterProtein	Q9UMZ2	Synergin gamma OS=Homo sapiens GN=SYNRG PE=1 SV=2	0	0	33	32	264	32	1	1314	140.6	5.03	6001	321.75	30	14	0	5.81481e+07	6.33932e+07	6.2205e+07	6.08252e+07	6.05082e+07	6.31922e+07	8.0635e+07	8.40624e+07	8.09482e+07
n/a	High	None	Q8NCA5	Protein FAM98A OS=Homo sapiens GN=FAM98A PE=1 SV=1		0	34	11	80	10	1	519	55.4	9.03		321.41		11	0	9.70189e+07	1.00094e+08	9.64406e+07	9.80648e+07	1.03668e+08	1.11175e+08	1.44542e+08	1.54021e+08	1.53564e+08
High	High	IsMasterProtein	Q9H0B6	Kinesin light chain 2 OS=Homo sapiens GN=KLC2 PE=1 SV=1	0	0	65	32	320	24	1	622	68.9	7.15	7760	321.13	31	13	1	104748119	1.0697e+08	1.03566e+08	1.26235e+08	1.31087e+08	1.27541e+08	1.57255e+08	1.54278e+08	1.51165e+08
n/a	High	IsMasterProtein	Q9NUL3	Double-stranded RNA-binding protein Staufen homolog 2 OS=Homo sapiens GN=STAU2 PE=1 SV=1		0	34	13	84	15	1	570	62.6	9.61		321.12		13	0	3.71138e+07	3.55997e+07	3.22824e+07	3.43453e+07	35005010	3.62362e+07	4.47557e+07	4.02179e+07	37656125
High	High	IsMasterProtein	Q53T59	HCLS1-binding protein 3 OS=Homo sapiens GN=HS1BP3 PE=1 SV=1	0	0	73	20	204	20	1	392	42.8	5.01	3973	320.99	18	15	0	1.12406e+08	1.19135e+08	1.08554e+08	1.11021e+08	1.12288e+08	1.14571e+08	1.28536e+08	1.29016e+08	1.21092e+08	Acetyl [N-Term]
High	High	IsMasterProtein	P39656	Dolichyl-diphosphooligosaccharide--protein glycosyltransferase 48 kDa subunit OS=Homo sapiens GN=DDOST PE=1 SV=4	0	0	47	15	266	15	1	456	50.8	6.55	5577	320.94	15	8	0	3.59375e+08	3.93517e+08	3.81506e+08	3.96104e+08	4.58481e+08	4.28629e+08	4.97213e+08	5.77675e+08	5.14027e+08
High	High	IsMasterProtein	Q8WXF1	Paraspeckle component 1 OS=Homo sapiens GN=PSPC1 PE=1 SV=1	0	0	57	30	310	27	1	523	58.7	6.67	6676	320.91	28	13	0	3.44445e+08	3.84314e+08	3.75249e+08	3.26013e+08	3.43429e+08	3.50164e+08	3.62101e+08	3.49506e+08	3.08668e+08
High	High	IsMasterProtein	P30405	Peptidyl-prolyl cis-trans isomerase F, mitochondrial OS=Homo sapiens GN=PPIF PE=1 SV=1	0	0	61	10	241	9	1	207	22	9.38	5281	320.87	10	4	0	2.88612e+08	3.22095e+08	3.47578e+08	2.70582e+08	3.08828e+08	2.94502e+08	4.13211e+08	4.57392e+08	4.46505e+08
High	High	IsMasterProtein	P12235	ADP/ATP translocase 1 OS=Homo sapiens GN=SLC25A4 PE=1 SV=4	0	0	61	21	572	4	1	298	33	9.76	10632	320.83	21	8	0	1.41669e+08	1.44735e+08	1.27607e+08	1.28308e+08	1.31475e+08	1.34122e+08	1.75408e+08	201514153	173323598	Acetyl [N-Term]
High	High	IsMasterProtein	P43897	Elongation factor Ts, mitochondrial OS=Homo sapiens GN=TSFM PE=1 SV=2	0	0	64	17	292	17	1	325	35.4	8.38	6240	320.81	17	9	0	2.47949e+08	2.58817e+08	2.7321e+08	2.53667e+08	2.47904e+08	2.52939e+08	3.6474e+08	3.56209e+08	3.42614e+08
High	High	IsMasterProtein	Q07666	KH domain-containing, RNA-binding, signal transduction-associated protein 1 OS=Homo sapiens GN=KHDRBS1 PE=1 SV=1	0	0	38	16	354	13	1	443	48.2	8.66	7341	320.6	16	7	4	1.1529e+09	1.08931e+09	1.05625e+09	1.06553e+09	1.16535e+09	1.0848e+09	1.2324e+09	1.43132e+09	1.30008e+09
High	High	IsMasterProtein	O14979	Heterogeneous nuclear ribonucleoprotein D-like OS=Homo sapiens GN=HNRNPDL PE=1 SV=3	0	0	42	17	388	15	1	420	46.4	9.57	8982	320.57	17	11	0	5.83608e+08	5.95793e+08	6.13831e+08	6.35316e+08	6.36017e+08	6.06913e+08	6.99658e+08	7.84362e+08	7.33113e+08
High	High	IsMasterProtein	Q9Y696	Chloride intracellular channel protein 4 OS=Homo sapiens GN=CLIC4 PE=1 SV=4	0	0	76	20	279	20	1	253	28.8	5.59	6381	320.56	19	10	0	2.93214e+08	314479368	3.09296e+08	3.95192e+08	4.46574e+08	3.99631e+08	3.67108e+08	3.87865e+08	3.57904e+08	Acetyl [N-Term; N-Term]
High	High	IsMasterProtein	Q06203	Amidophosphoribosyltransferase OS=Homo sapiens GN=PPAT PE=1 SV=1	0	0	52	21	283	21	1	517	57.4	6.76	6718	320.44	21	12	0	3.63693e+08	3.68855e+08	3.70445e+08	4.27626e+08	4.22431e+08	4.27128e+08	5.53046e+08	5.5891e+08	5.22811e+08	Acetyl [N-Term]
High	High	IsMasterProtein	Q15428	Splicing factor 3A subunit 2 OS=Homo sapiens GN=SF3A2 PE=1 SV=2	0	0	38	18	326	18	1	464	49.2	9.64	8024	320.09	18	7	0	4.66577e+08	4.88951e+08	4.97582e+08	4.75606e+08	4.82025e+08	5.02005e+08	5.04437e+08	4.8622e+08	4.87377e+08	Acetyl [N-Term]
High	High	IsMasterProtein	Q8N3U4	Cohesin subunit SA-2 OS=Homo sapiens GN=STAG2 PE=1 SV=3	0	0	36	38	371	28	1	1231	141.2	5.43	8320	319.52	38	19	13	2.66524e+08	2.66535e+08	2.51012e+08	2.32053e+08	2.38801e+08	2.39756e+08	2.39243e+08	2.40058e+08	2.36344e+08
High	High	IsMasterProtein	Q7Z478	ATP-dependent RNA helicase DHX29 OS=Homo sapiens GN=DHX29 PE=1 SV=2	0	0	45	57	434	56	1	1369	155.1	8.09	10007	318.93	56	25	1	1.99123e+08	2.11734e+08	2.09091e+08	2.02806e+08	2.11562e+08	2.26259e+08	2.27373e+08	2.42678e+08	2.32619e+08
High	High	IsMasterProtein	Q9C0B1	Alpha-ketoglutarate-dependent dioxygenase FTO OS=Homo sapiens GN=FTO PE=1 SV=3	0	0	55	22	325	22	1	505	58.2	5.22	8795	318.83	21	13	0	1.633e+08	1.76159e+08	1.77466e+08	1.85834e+08	1.90214e+08	1.96493e+08	1.6815e+08	1.7196e+08	1.65977e+08
High	High	IsMasterProtein	O60784	Target of Myb protein 1 OS=Homo sapiens GN=TOM1 PE=1 SV=2	0	0	53	18	254	18	1	492	53.8	4.7	6264	318.7	18	10	0	9.4335e+07	9.33336e+07	9.24165e+07	9.44905e+07	9.39993e+07	1.00209e+08	1.22746e+08	1.23792e+08	1.20213e+08	Acetyl [N-Term]
High	High	IsMasterProtein	Q9NZN5	Rho guanine nucleotide exchange factor 12 OS=Homo sapiens GN=ARHGEF12 PE=1 SV=1	0	0	32	35	264	35	1	1544	173.1	5.74	6565	318.68	35	16	0	4.55101e+07	4.7667e+07	4.84831e+07	5.13681e+07	5.2312e+07	5.1847e+07	6.44154e+07	6.57138e+07	6.79779e+07	Acetyl [N-Term]
High	High	IsMasterProtein	O15294	UDP-N-acetylglucosamine--peptide N-acetylglucosaminyltransferase 110 kDa subunit OS=Homo sapiens GN=OGT PE=1 SV=3	0	0	47	42	389	42	1	1046	116.9	6.7	8806	318.54	41	22	0	2.72176e+08	2.72063e+08	2.60492e+08	2.67301e+08	2.78464e+08	2.7675e+08	3.02977e+08	3.14059e+08	2.9537e+08	Acetyl [N-Term]
High	High	IsMasterProtein	Q68EM7	Rho GTPase-activating protein 17 OS=Homo sapiens GN=ARHGAP17 PE=1 SV=1	0	0	56	31	257	30	1	881	95.4	7.62	5333	318.28	30	16	1	7.72957e+07	8.54826e+07	8.8118e+07	8.23409e+07	9.97579e+07	9.15411e+07	1.17198e+08	1.15687e+08	1.12468e+08
High	High	IsMasterProtein	P49720	Proteasome subunit beta type-3 OS=Homo sapiens GN=PSMB3 PE=1 SV=2	0	0	57	11	307	11	1	205	22.9	6.55	8181	318.11	11	7	0	3.09608e+08	3.25458e+08	3.32322e+08	3.19176e+08	3.25116e+08	3.42064e+08	3.73935e+08	4.48641e+08	4.1404e+08	Acetyl [N-Term]
High	High	IsMasterProtein	P07108	Acyl-CoA-binding protein OS=Homo sapiens GN=DBI PE=1 SV=2	0	0	61	7	281	7	1	87	10	6.57	6641	318.03	7	3	0	1.6872e+09	1.6322e+09	1.66771e+09	1.66697e+09	1.61988e+09	1.58745e+09	1.8745e+09	1.98626e+09	1.9771e+09	Acetyl [N-Term]
High	High	IsMasterProtein	Q96DH6	RNA-binding protein Musashi homolog 2 OS=Homo sapiens GN=MSI2 PE=1 SV=1	0	0	46	13	260	13	1	328	35.2	8.48	6555	317.74	13	8	0	1.52155e+08	1.45543e+08	1.42209e+08	1.39689e+08	1.45e+08	1.53211e+08	1.92786e+08	1.72051e+08	1.96335e+08	Acetyl [N-Term]
High	High	IsMasterProtein	Q9Y4P3	Transducin beta-like protein 2 OS=Homo sapiens GN=TBL2 PE=1 SV=1	0	0	59	23	320	23	1	447	49.8	9.44	7558	317.6	23	14	0	1.7301e+08	1.71211e+08	1.82562e+08	2.08438e+08	2.08083e+08	2.21441e+08	2.46042e+08	2.48584e+08	2.38115e+08
High	High	None	Q13066	G antigen 2B/2C OS=Homo sapiens GN=GAGE2B PE=1 SV=1	0	0	48	3	324	2	1	116	12.8	4.37	5993	317.58	3	3	0	2.37842e+08	2.63934e+08	2.79332e+08	1.65141e+08	2.01249e+08	2.03112e+08	2.95163e+08	2.69639e+08	2.58452e+08
High	High	None	Q9UEU5	G antigen 2D OS=Homo sapiens GN=GAGE2D PE=1 SV=1	0	0	48	3	324	2	1	116	12.8	4.28	5993	317.58	3	3	0	2.37842e+08	2.63934e+08	2.79332e+08	1.65141e+08	2.01249e+08	2.03112e+08	2.95163e+08	2.69639e+08	2.58452e+08
n/a	High	None	Q4V326	G antigen 2E OS=Homo sapiens GN=GAGE2E PE=3 SV=1		0	48	3	85	2	1	116	12.8	4.37		317.58		3	0	2.37842e+08	2.63934e+08	2.79332e+08	1.65141e+08	2.01249e+08	2.03112e+08	2.95163e+08	2.69639e+08	2.58452e+08
High	High	IsMasterProtein	Q9NPH2	Inositol-3-phosphate synthase 1 OS=Homo sapiens GN=ISYNA1 PE=1 SV=1	0	0	43	16	264	16	1	558	61	5.76	5174	317.55	15	10	0	2.85791e+08	3.06404e+08	2.96022e+08	2.28737e+08	2.50167e+08	2.69695e+08	3.34519e+08	3.43675e+08	3.27708e+08
High	High	IsMasterProtein	O75362	Zinc finger protein 217 OS=Homo sapiens GN=ZNF217 PE=1 SV=1	0	0	50	35	295	35	1	1048	115.2	8.48	7781	317.18	35	17	0	9.1605e+07	1.06138e+08	1.12705e+08	8.25318e+07	8.84988e+07	1.03492e+08	1.27525e+08	1.34292e+08	1.04373e+08
High	High	IsMasterProtein	O15355	Protein phosphatase 1G OS=Homo sapiens GN=PPM1G PE=1 SV=1	0	0	56	27	326	27	1	546	59.2	4.36	8942	316.91	26	12	0	3.67096e+08	4.17212e+08	4.27055e+08	3.87641e+08	4.10104e+08	4.28517e+08	4.8082e+08	4.63723e+08	4.63314e+08
High	High	IsMasterProtein	Q9P2K8	eIF-2-alpha kinase GCN2 OS=Homo sapiens GN=EIF2AK4 PE=1 SV=3	0	0	37	48	334	48	1	1649	186.8	6.28	7544	316.9	46	18	0	1.27095e+08	1.31221e+08	1.30199e+08	1.28827e+08	1.24065e+08	1.26718e+08	1.59212e+08	1.64464e+08	1.58389e+08
High	High	IsMasterProtein	Q9Y2T7	Y-box-binding protein 2 OS=Homo sapiens GN=YBX2 PE=1 SV=2	0	0	15	5	253	1	1	364	38.5	10.8	8611	316.88	4	4	0
High	High	IsMasterProtein	P46783	40S ribosomal protein S10 OS=Homo sapiens GN=RPS10 PE=1 SV=1	0	0	62	14	439	14	1	165	18.9	10.15	11103	316.57	14	5	0	1.71581e+09	1.93465e+09	1.5723e+09	1.71419e+09	1.63993e+09	1842317970	1.90472e+09	1.73663e+09	1.71789e+09
High	High	IsMasterProtein	O94915	Protein furry homolog-like OS=Homo sapiens GN=FRYL PE=1 SV=2	0	0	17	40	256	39	1	3013	339.4	5.58	5204	316.44	35	20	1	3.65679e+07	3.6739e+07	3.88932e+07	4.04996e+07	4.00273e+07	4.04017e+07	4.84624e+07	4.76542e+07	4.4808e+07
High	High	IsMasterProtein	Q93034	Cullin-5 OS=Homo sapiens GN=CUL5 PE=1 SV=4	0	0	46	36	340	36	1	780	90.9	7.94	8405	316.31	35	17	0	2.45796e+08	2.56203e+08	2.64067e+08	2.63995e+08	2.65982e+08	2.80865e+08	2.40628e+08	2.5017e+08	2.29916e+08
High	High	IsMasterProtein	Q12972	Nuclear inhibitor of protein phosphatase 1 OS=Homo sapiens GN=PPP1R8 PE=1 SV=2	0	0	59	18	259	18	1	351	38.5	7.37	5406	316.24	18	12	0	143403177	1.44167e+08	1.44468e+08	1.32224e+08	1.43243e+08	1.43513e+08	1.59906e+08	1.68994e+08	1.79816e+08	Acetyl [N-Term]
High	High	IsMasterProtein	Q6ZVM7	TOM1-like protein 2 OS=Homo sapiens GN=TOM1L2 PE=1 SV=1	0	0	61	23	280	23	1	507	55.5	4.79	6528	316.19	22	13	0	1.20607e+08	1.29718e+08	1.31562e+08	1.33785e+08	1.37604e+08	1.40804e+08	1.66541e+08	1.80337e+08	1.61341e+08	Acetyl [N-Term]
High	High	IsMasterProtein	P49257	Protein ERGIC-53 OS=Homo sapiens GN=LMAN1 PE=1 SV=2	0	0	47	21	329	21	1	510	57.5	6.77	6754	316.03	21	11	0	5.99548e+08	6.09979e+08	5.51626e+08	5.80007e+08	5.55855e+08	6.2238e+08	5.70246e+08	5.97354e+08	6.0612e+08
High	High	IsMasterProtein	Q14C86	GTPase-activating protein and VPS9 domain-containing protein 1 OS=Homo sapiens GN=GAPVD1 PE=1 SV=2	0	0	33	39	289	39	1	1478	164.9	5.22	7154	316.01	38	19	0	1.23102e+08	1.31738e+08	1.22533e+08	1.17753e+08	1.23985e+08	1.26862e+08	147718542	1.49939e+08	1.39404e+08
High	High	IsMasterProtein	P17612	cAMP-dependent protein kinase catalytic subunit alpha OS=Homo sapiens GN=PRKACA PE=1 SV=2	0	0	49	16	272	6	1	351	40.6	8.79	5598	315.79	16	10	0	4.60387e+07	3.92537e+07	3.88031e+07	4.51287e+07	4.05879e+07	44028610	4.03459e+07	4.80154e+07	43293402
High	High	IsMasterProtein	P78362	SRSF protein kinase 2 OS=Homo sapiens GN=SRPK2 PE=1 SV=3	0	0	38	23	311	19	1	688	77.5	4.97	7022	315.72	23	13	0	9.46321e+07	9.51796e+07	9.7684e+07	9.1702e+07	9.25898e+07	9.28323e+07	1.2729e+08	1.29496e+08	1.34444e+08
High	High	IsMasterProtein	Q9NRF8	CTP synthase 2 OS=Homo sapiens GN=CTPS2 PE=1 SV=1	0	0	57	30	372	26	1	586	65.6	6.9	8180	315.23	30	13	4	3.37996e+08	3.59994e+08	3.48711e+08	3.52751e+08	3.61597e+08	3.59574e+08	4.2665e+08	4.51014e+08	4.28312e+08
High	High	IsMasterProtein	P62753	40S ribosomal protein S6 OS=Homo sapiens GN=RPS6 PE=1 SV=1	0	0	37	11	325	11	1	249	28.7	10.84	7314	315.22	11	4	0	1.67344e+09	1.69598e+09	1.53518e+09	1.68522e+09	1.77949e+09	1.96123e+09	2.48645e+09	2.47129e+09	2.34598e+09
High	High	IsMasterProtein	P35249	Replication factor C subunit 4 OS=Homo sapiens GN=RFC4 PE=1 SV=2	0	0	59	21	269	21	1	363	39.7	8.02	6693	315.2	21	10	0	2.547e+08	2.73993e+08	2.78767e+08	2.97701e+08	3.23112e+08	2.91048e+08	2.51413e+08	2.47072e+08	2.4817e+08
High	High	IsMasterProtein	Q99700	Ataxin-2 OS=Homo sapiens GN=ATXN2 PE=1 SV=2	0	0	33	33	327	33	1	1313	140.2	9.57	8315	315.17	32	13	0	1.23578e+08	1.25628e+08	1.18128e+08	1.21622e+08	1.23355e+08	1.30959e+08	1.69131e+08	1.72061e+08	1.71447e+08
High	High	IsMasterProtein	Q99598	Translin-associated protein X OS=Homo sapiens GN=TSNAX PE=1 SV=1	0	0	66	16	270	16	1	290	33.1	6.55	6195	314.74	16	9	0	1.94658e+08	1.96835e+08	1.9189e+08	2.04379e+08	2.08766e+08	2.01128e+08	2.62647e+08	2.57322e+08	2.55879e+08
High	High	IsMasterProtein	O95819	Mitogen-activated protein kinase kinase kinase kinase 4 OS=Homo sapiens GN=MAP4K4 PE=1 SV=2	0	0	38	44	345	28	1	1239	142	7.46	7498	314.45	44	16	14	1.30971e+08	1.40166e+08	1.31268e+08	1.17214e+08	1.18798e+08	1.28572e+08	1.38168e+08	1.34998e+08	1.35284e+08
High	High	IsMasterProtein	Q69YN2	CWF19-like protein 1 OS=Homo sapiens GN=CWF19L1 PE=1 SV=2	0	0	53	24	254	24	1	538	60.6	7.24	5896	313.81	24	14	0	8.08206e+07	82074496	8.52518e+07	7.75804e+07	7.57422e+07	8.01629e+07	7.48445e+07	6.92314e+07	6.88632e+07
High	High	IsMasterProtein	P47756	F-actin-capping protein subunit beta OS=Homo sapiens GN=CAPZB PE=1 SV=4	0	0	53	15	547	15	1	277	31.3	5.59	14515	313.66	15	9	0	9.60057e+08	9.52327e+08	9.36481e+08	9.36837e+08	9.47469e+08	9.49115e+08	1.09652e+09	1.142e+09	1.16072e+09	Acetyl [N-Term]
High	High	IsMasterProtein	Q9H089	Large subunit GTPase 1 homolog OS=Homo sapiens GN=LSG1 PE=1 SV=2	0	0	58	31	363	31	1	658	75.2	6.38	9564	313.37	31	16	0	1.74259e+08	1.85005e+08	1.81601e+08	1.84259e+08	1.78796e+08	1.99309e+08	2.98066e+08	2.82297e+08	2.75435e+08
High	High	IsMasterProtein	Q13796	Protein Shroom2 OS=Homo sapiens GN=SHROOM2 PE=1 SV=1	0	0	39	45	331	43	1	1616	176.3	7.09	7648	313.34	44	22	2	7.97238e+07	9.03582e+07	8.04549e+07	8.61237e+07	8.86744e+07	9.13121e+07	1.15673e+08	1.19942e+08	1.15828e+08	Acetyl [N-Term]
High	High	IsMasterProtein	Q00169	Phosphatidylinositol transfer protein alpha isoform OS=Homo sapiens GN=PITPNA PE=1 SV=2	0	0	68	20	362	15	1	270	31.8	6.55	8008	312.87	20	6	0	3.88707e+08	4.3711e+08	4.39979e+08	4.58909e+08	4.90548e+08	4.7843e+08	6.28022e+08	5.93228e+08	5.92836e+08
High	High	IsMasterProtein	Q9BXK5	Bcl-2-like protein 13 OS=Homo sapiens GN=BCL2L13 PE=1 SV=1	0	0	63	21	258	21	1	485	52.7	4.44	5414	312.54	20	11	0	8.31676e+07	8.60078e+07	8.97958e+07	7.94154e+07	8.62609e+07	8.71832e+07	1.13396e+08	1.09944e+08	1.0713e+08	Acetyl [N-Term]
High	High	IsMasterProteinRejected	P0C0S8	Histone H2A type 1 OS=Homo sapiens GN=HIST1H2AG PE=1 SV=2	0	0	65	8	328	0	0	130	14.1	10.9	5159	312.08	8	4	0
High	High	IsMasterProteinCandidateRejected	Q99878	Histone H2A type 1-J OS=Homo sapiens GN=HIST1H2AJ PE=1 SV=3	0	0	66	8	328	0	0	128	13.9	10.89	5159	312.08	8	4	0
High	High	IsMasterProteinCandidateRejected	Q93077	Histone H2A type 1-C OS=Homo sapiens GN=HIST1H2AC PE=1 SV=3	0	0	65	8	328	0	0	130	14.1	11.05	5159	312.08	8	4	0
High	High	IsMasterProteinCandidateRejected	Q96KK5	Histone H2A type 1-H OS=Homo sapiens GN=HIST1H2AH PE=1 SV=3	0	0	66	8	328	0	0	128	13.9	10.89	5159	312.08	8	4	0
High	High	None	Q9BTM1	Histone H2A.J OS=Homo sapiens GN=H2AFJ PE=1 SV=1	0	0	60	7	327	0	0	129	14	10.9	5148	312.08	7	4	0
High	High	IsMasterProteinCandidate	P20671	Histone H2A type 1-D OS=Homo sapiens GN=HIST1H2AD PE=1 SV=2	0	0	65	8	317	3	1	130	14.1	10.9	5024	312.08	8	4	0	2.71553e+09	2.92796e+09	2.53858e+09	3.66639e+09	2.77359e+09	2.90418e+09	2.60932e+09	2.58637e+09	2.62813e+09
High	High	IsMasterProtein	P04908	Histone H2A type 1-B/E OS=Homo sapiens GN=HIST1H2AB PE=1 SV=2	0	0	65	8	317	3	1	130	14.1	11.05	5024	312.08	8	4	0	2.71553e+09	2.92796e+09	2.53858e+09	3.66639e+09	2.77359e+09	2.90418e+09	2.60932e+09	2.58637e+09	2.62813e+09
High	High	IsMasterProteinCandidate	Q7L7L0	Histone H2A type 3 OS=Homo sapiens GN=HIST3H2A PE=1 SV=3	0	0	65	8	317	3	1	130	14.1	11.05	5024	312.08	8	4	0	2.71553e+09	2.92796e+09	2.53858e+09	3.66639e+09	2.77359e+09	2.90418e+09	2.60932e+09	2.58637e+09	2.62813e+09
High	High	IsMasterProtein	Q9P2D3	HEAT repeat-containing protein 5B OS=Homo sapiens GN=HEATR5B PE=1 SV=2	0	0	25	39	245	39	1	2071	224.2	7.17	5725	311.74	37	21	0	4.14056e+07	4.4306e+07	4.24894e+07	4.64757e+07	4.49158e+07	4.52855e+07	4.96143e+07	4.90175e+07	4.74014e+07
High	High	IsMasterProtein	Q9NP97	Dynein light chain roadblock-type 1 OS=Homo sapiens GN=DYNLRB1 PE=1 SV=3	0	0	70	6	222	6	1	96	10.9	7.25	4804	311.72	6	4	0	1.98934e+08	2.27201e+08	2.12474e+08	2.69791e+08	2.39541e+08	2.43242e+08	2.76493e+08	2.58857e+08	2.84014e+08	Acetyl [N-Term]
High	High	IsMasterProtein	Q9Y450	HBS1-like protein OS=Homo sapiens GN=HBS1L PE=1 SV=1	0	0	56	32	340	32	1	684	75.4	6.61	8972	311.68	32	15	0	2.23457e+08	2.30751e+08	2.25684e+08	2.44583e+08	2.5578e+08	2.59384e+08	2.6568e+08	2.60046e+08	2.4429e+08
High	High	IsMasterProtein	Q96ST3	Paired amphipathic helix protein Sin3a OS=Homo sapiens GN=SIN3A PE=1 SV=2	0	0	38	43	363	43	1	1273	145.1	7.25	8244	310.84	42	20	0	1.56191e+08	1.59669e+08	1.65216e+08	1.44682e+08	1.57154e+08	1.54411e+08	1.42948e+08	1.45315e+08	1.38075e+08
n/a	High	None	Q52LJ0	Protein FAM98B OS=Homo sapiens GN=FAM98B PE=1 SV=1		0	46	12	83	14	1	330	37.2	6.29		310.81		12	0	1.52638e+08	1.49503e+08	1.58284e+08	1.67258e+08	1.87209e+08	1.81298e+08	2.01462e+08	1.99075e+08	1.9424e+08
High	High	IsMasterProtein	Q15427	Splicing factor 3B subunit 4 OS=Homo sapiens GN=SF3B4 PE=1 SV=1	0	0	30	9	229	9	1	424	44.4	8.56	4998	310.61	9	6	0	1.32432e+08	133843164	1.43562e+08	1.32646e+08	1.44588e+08	147679828	1.25118e+08	1.15063e+08	1.15551e+08	Acetyl [N-Term]
High	High	IsMasterProtein	P15927	Replication protein A 32 kDa subunit OS=Homo sapiens GN=RPA2 PE=1 SV=1	0	0	69	11	257	11	1	270	29.2	6.15	5179	310.42	10	8	0	3.9405e+08	3.9444e+08	3.65145e+08	4.12687e+08	3.72593e+08	4.58657e+08	4.73076e+08	4.91623e+08	4.38264e+08	Acetyl [N-Term]
High	High	IsMasterProtein	Q9Y6Y8	SEC23-interacting protein OS=Homo sapiens GN=SEC23IP PE=1 SV=1	0	0	48	41	455	40	1	1000	111	5.54	10073	310.41	41	18	1	4.75329e+08	5.11822e+08	5.15597e+08	4.86865e+08	4.76875e+08	4.9518e+08	6.88503e+08	6.81663e+08	6.97177e+08
High	High	IsMasterProtein	Q9NSK0	Kinesin light chain 4 OS=Homo sapiens GN=KLC4 PE=1 SV=3	0	0	53	28	279	21	1	619	68.6	6.18	6892	310.04	28	14	1	5.33255e+07	6.03044e+07	6.34162e+07	5.8848e+07	6.1038e+07	6.55015e+07	6.92277e+07	6.82332e+07	6.51552e+07	Acetyl [N-Term]
High	High	IsMasterProtein	O15160	DNA-directed RNA polymerases I and III subunit RPAC1 OS=Homo sapiens GN=POLR1C PE=1 SV=1	0	0	44	11	216	11	1	346	39.2	5.5	6210	308.96	11	6	0	1.52221e+08	1.7863e+08	1.66269e+08	1.72933e+08	1.83666e+08	1.84352e+08	2.17645e+08	2.26185e+08	2.13606e+08	Acetyl [N-Term]
High	High	IsMasterProtein	P38159	RNA-binding motif protein, X chromosome OS=Homo sapiens GN=RBMX PE=1 SV=3	0	0	56	30	546	8	1	391	42.3	10.05	12880	308.72	30	7	26	1.58861e+09	2.14621e+09	2.04375e+09	2.14374e+09	2.16119e+09	2.17582e+09	2.55011e+09	2.48491e+09	2.61893e+09	Acetyl [N-Term; N-Term]
High	High	IsMasterProtein	Q8WVJ2	NudC domain-containing protein 2 OS=Homo sapiens GN=NUDCD2 PE=1 SV=1	0	0	58	8	218	8	1	157	17.7	5.07	5083	308.59	8	7	0	2.13775e+08	2.07488e+08	2.09425e+08	2.02209e+08	2.10146e+08	2.12602e+08	2.60094e+08	2.64629e+08	2.5509e+08	Acetyl [N-Term]
High	High	IsMasterProtein	Q9NR50	Translation initiation factor eIF-2B subunit gamma OS=Homo sapiens GN=EIF2B3 PE=1 SV=1	0	0	59	24	289	24	1	452	50.2	6.47	6418	308.14	23	14	0	1.85695e+08	1.99835e+08	2.06774e+08	2.00216e+08	1.99535e+08	2.11526e+08	1.97847e+08	2.3427e+08	2.13466e+08	Acetyl [N-Term]
High	High	IsMasterProtein	Q9UPY3	Endoribonuclease Dicer OS=Homo sapiens GN=DICER1 PE=1 SV=3	0	0	37	52	291	52	1	1922	218.5	5.68	6415	307.84	50	24	0	5.42003e+07	5.95092e+07	5.82872e+07	8.52674e+07	9.50131e+07	9.55431e+07	1.5515e+08	1.61472e+08	1.54324e+08
High	High	IsMasterProtein	O94919	Endonuclease domain-containing 1 protein OS=Homo sapiens GN=ENDOD1 PE=1 SV=2	0	0	40	15	249	15	1	500	55	5.71	5701	307.66	15	10	0	3.22981e+08	3.18417e+08	3.30709e+08	3.14842e+08	3.25385e+08	3.47e+08	4.40227e+08	4.36664e+08	4.55544e+08
High	High	IsMasterProtein	P55196	Afadin OS=Homo sapiens GN=AFDN PE=1 SV=3	0	0	34	42	266	40	1	1824	206.7	6.47	6123	307.59	40	19	1	6.71074e+07	6.84013e+07	6.54904e+07	7.33907e+07	6.97126e+07	7.39087e+07	8.18433e+07	7.63642e+07	7.62057e+07
High	High	IsMasterProtein	Q6ISB3	Grainyhead-like protein 2 homolog OS=Homo sapiens GN=GRHL2 PE=1 SV=1	0	0	55	32	291	31	1	625	71.1	6.44	7655	307.58	31	15	1	1.54616e+08	1.60519e+08	1.53282e+08	1.8058e+08	1.68244e+08	1.86559e+08	1.82194e+08	1.77562e+08	1.72614e+08
High	High	IsMasterProtein	O96013	Serine/threonine-protein kinase PAK 4 OS=Homo sapiens GN=PAK4 PE=1 SV=1	0	0	47	21	280	21	1	591	64	9.73	7555	307.58	21	12	0	2.23137e+08	2.23705e+08	2.25364e+08	2.35269e+08	2.6215e+08	2.51377e+08	2.21934e+08	2.34718e+08	2.23732e+08
High	High	IsMasterProtein	P08240	Signal recognition particle receptor subunit alpha OS=Homo sapiens GN=SRPRA PE=1 SV=2	0	0	48	29	313	29	1	638	69.8	8.95	7881	307.48	29	14	0	1.29334e+08	1.28538e+08	1.34213e+08	1.66547e+08	1.66234e+08	1.70914e+08	2.00163e+08	2.15828e+08	2.01995e+08
High	High	IsMasterProtein	Q9BTE3	Mini-chromosome maintenance complex-binding protein OS=Homo sapiens GN=MCMBP PE=1 SV=2	0	0	48	25	315	25	1	642	72.9	5.87	7050	307.43	25	16	0	1.95728e+08	1.9978e+08	2.00886e+08	1.97512e+08	1.99407e+08	2.18824e+08	1.93685e+08	2.00213e+08	1.90516e+08
n/a	High	IsMasterProtein	Q13111	Chromatin assembly factor 1 subunit A OS=Homo sapiens GN=CHAF1A PE=1 SV=2		0	32	17	78	16	1	956	106.9	5.94		307.02		17	0	4.00153e+07	4.13886e+07	3.74419e+07	4.27449e+07	3.80748e+07	4.04179e+07	3.48851e+07	3.74963e+07	3.72831e+07	Acetyl [N-Term]
High	High	IsMasterProtein	O60333	Kinesin-like protein KIF1B OS=Homo sapiens GN=KIF1B PE=1 SV=5	0	0	24	33	312	19	1	1816	204.3	5.6	7127	306.73	32	15	0	2.76597e+07	2.66201e+07	2.57934e+07	2.8636e+07	2.84649e+07	3.11027e+07	3.55555e+07	3.80272e+07	3.6999e+07
n/a	High	IsMasterProtein	P80303	Nucleobindin-2 OS=Homo sapiens GN=NUCB2 PE=1 SV=2		0	46	14	79	13	1	420	50.2	5.12		306.6		14	0	9.20711e+07	1.00875e+08	1.04916e+08	9.16204e+07	8.80349e+07	9.85137e+07	8.37805e+07	9.88123e+07	8.41957e+07
High	High	IsMasterProtein	O95163	Elongator complex protein 1 OS=Homo sapiens GN=IKBKAP PE=1 SV=3	0	0	37	36	281	36	1	1332	150.2	5.94	6833	306.54	35	19	0	8.91833e+07	7.20598e+07	7.27491e+07	8.42484e+07	7.52063e+07	8.20854e+07	1.01377e+08	1.0331e+08	1.03964e+08
High	High	IsMasterProtein	Q9NQG5	Regulation of nuclear pre-mRNA domain-containing protein 1B OS=Homo sapiens GN=RPRD1B PE=1 SV=1	0	0	68	18	274	14	1	326	36.9	5.97	6086	306.41	18	11	1	1.82028e+08	1.96121e+08	1.83267e+08	2.00028e+08	1.87851e+08	1.82621e+08	2.11313e+08	2.11258e+08	2.07652e+08	Acetyl [N-Term]
High	High	IsMasterProtein	P07858	Cathepsin B OS=Homo sapiens GN=CTSB PE=1 SV=3	0	0	37	9	250	9	1	339	37.8	6.3	6470	306.17	9	5	0	2.376e+08	2.38089e+08	2.48087e+08	2.51231e+08	2.73534e+08	2.75731e+08	2.79699e+08	2.89778e+08	2.75554e+08
High	High	IsMasterProtein	Q15942	Zyxin OS=Homo sapiens GN=ZYX PE=1 SV=1	0	0	58	22	257	22	1	572	61.2	6.67	5353	305.88	21	13	0	1.04436e+08	1.1021e+08	1.04416e+08	1.22662e+08	1.25184e+08	1.23464e+08	1.31685e+08	1.34953e+08	1.31426e+08	Acetyl [N-Term]
High	High	IsMasterProtein	Q5VW32	BRO1 domain-containing protein BROX OS=Homo sapiens GN=BROX PE=1 SV=1	0	0	36	11	242	11	1	411	46.4	7.65	4570	305.84	11	7	0	2.10942e+08	2.25575e+08	2.12151e+08	2.23902e+08	2.31197e+08	2.43336e+08	2.60551e+08	2.77347e+08	262046473
High	High	IsMasterProtein	P60510	Serine/threonine-protein phosphatase 4 catalytic subunit OS=Homo sapiens GN=PPP4C PE=1 SV=1	0	0	57	14	209	12	1	307	35.1	5.06	3810	305.78	14	10	0	6.8738e+07	7.09481e+07	7.21803e+07	7.74381e+07	7.95503e+07	7.83138e+07	9.17381e+07	9.18676e+07	9.03165e+07	Acetyl [N-Term]
High	High	IsMasterProtein	Q96T37	Putative RNA-binding protein 15 OS=Homo sapiens GN=RBM15 PE=1 SV=2	0	0	38	30	333	30	1	977	107.1	10.08	7811	305.75	28	15	0	1.22683e+08	1.31123e+08	1.2622e+08	1.34824e+08	1.51307e+08	1.39755e+08	1.4726e+08	1.51294e+08	1.48924e+08
High	High	IsMasterProtein	Q15648	Mediator of RNA polymerase II transcription subunit 1 OS=Homo sapiens GN=MED1 PE=1 SV=4	0	0	33	39	340	39	1	1581	168.4	8.73	8740	305.7	38	21	0	6.24324e+07	6.48724e+07	6.01537e+07	6.33962e+07	6.30835e+07	6.28828e+07	6.20391e+07	6.17259e+07	6.58214e+07	Acetyl [N-Term]
High	High	IsMasterProtein	P43034	Platelet-activating factor acetylhydrolase IB subunit alpha OS=Homo sapiens GN=PAFAH1B1 PE=1 SV=2	0	0	68	27	414	26	1	410	46.6	7.37	9551	305.57	27	16	1	5.72766e+08	6.11388e+08	5.64999e+08	5.87921e+08	6.34308e+08	6.25521e+08	6.89331e+08	7.07043e+08	6.76035e+08
High	High	IsMasterProtein	Q13557	Calcium/calmodulin-dependent protein kinase type II subunit delta OS=Homo sapiens GN=CAMK2D PE=1 SV=3	0	0	36	14	257	10	1	499	56.3	7.25	6529	305.31	14	7	0	4.62092e+07	4.31753e+07	4.429e+07	5.30708e+07	5.21809e+07	5.3489e+07	8.2706e+07	8.24684e+07	7.95778e+07	Acetyl [N-Term]
High	High	IsMasterProtein	O15446	DNA-directed RNA polymerase I subunit RPA34 OS=Homo sapiens GN=CD3EAP PE=1 SV=1	0	0	68	22	208	22	1	510	55	8.51	4892	304.81	21	16	0	6.22319e+07	6.48547e+07	6.45447e+07	5.58015e+07	5.77996e+07	5.86372e+07	7.53461e+07	7.22395e+07	7.48261e+07	Acetyl [N-Term]
High	High	IsMasterProtein	Q9NYV4	Cyclin-dependent kinase 12 OS=Homo sapiens GN=CDK12 PE=1 SV=2	0	0	31	35	332	30	1	1490	164.1	9.44	8699	304.81	33	19	5	2.17789e+08	2.28457e+08	2.13905e+08	2.5757e+08	3.05425e+08	2.59553e+08	285627693	2.986e+08	2.82565e+08
High	High	IsMasterProtein	P39880	Homeobox protein cut-like 1 OS=Homo sapiens GN=CUX1 PE=1 SV=3	0	0	36	47	337	19	1	1505	164.1	5.9	8295	304.75	43	26	29	1.35443e+08	1.39928e+08	1.4378e+08	1.35281e+08	1.45282e+08	1.40419e+08	1.50882e+08	1.46907e+08	1.40347e+08
High	High	IsMasterProtein	Q9UJC3	Protein Hook homolog 1 OS=Homo sapiens GN=HOOK1 PE=1 SV=2	0	0	47	34	311	34	1	728	84.6	5.15	8004	304.13	33	16	0	1.8918e+08	201702168	1.99968e+08	2.14573e+08	2.10976e+08	2.14949e+08	2.99387e+08	2.91151e+08	2.78091e+08
High	High	IsMasterProtein	Q9NTI5	Sister chromatid cohesion protein PDS5 homolog B OS=Homo sapiens GN=PDS5B PE=1 SV=1	0	0	37	50	387	44	1	1447	164.6	8.47	9129	304.11	50	14	0	1.60617e+08	1.59334e+08	171205608	1.78023e+08	1.80422e+08	1.90449e+08	1.59293e+08	1.66934e+08	1.58385e+08
High	High	IsMasterProtein	O43823	A-kinase anchor protein 8 OS=Homo sapiens GN=AKAP8 PE=1 SV=1	0	0	49	20	272	20	1	692	76.1	5.15	6869	303.97	20	11	0	6.98381e+07	7.97808e+07	7.57896e+07	6.64354e+07	7.24536e+07	7.34808e+07	8.95904e+07	8.89723e+07	8.60401e+07
[truncated: 10,005 more rows]

## Sheet: Filtered
Protein FDR Confidence: Mascot	Protein FDR Confidence: Sequest HT	Master	Accession	Description	Exp. q-value: Mascot	Exp. q-value: Sequest HT	Coverage [%]	# Peptides	# PSMs	# Unique Peptides	# Protein Groups	# AAs	MW [kDa]	calc. pI	Score Mascot: Mascot	Score Sequest HT: Sequest HT	# Peptides (by Search Engine): Mascot	# Peptides (by Search Engine): Sequest HT	# Razor Peptides	Abundances (Grouped): NT 1	Abundances (Grouped): NT 2	Abundances (Grouped): NT 3	Abundances (Grouped): 48h Ctrl 1	Abundances (Grouped): 48h Ctrl 2	Abundances (Grouped): 48h Ctrl 3	Abundances (Grouped): 48h KD 1	Abundances (Grouped): 48h KD 2	Abundances (Grouped): 48h KD 3	Modifications
[truncated: 6,886 more rows]

[truncated: 1 more sheets: Normalized]
