# Supplementary material for: The Potential Tumor-Suppressor DHRS7 Inversely Correlates with EGFR Expression in Prostate Cancer Cells and Tumor Samples
Source: Cancers (Basel). 2022 Jun 23;14(13):3074. doi: 10.3390/cancers14133074 (PMC9264982; doi:10.3390/cancers14133074)
Supplement: Supplementary file 1 [file cancers-14-03074-s001.zip › DHRS7_Supplementary_File4.xlsx]

## Sheet: Information
Information:
Inlcuded are all proteins that have been detected in all three time points (24h, 36h, 48h).
Headers:	Ctrl/KD 1-3:	Corresponding technical replicates (repeated injections/measurements by mass-spectrometry; log2 median normalized) of the three different time points (24h, 36h, 48h) obtained from Supp Files 1-3
	FC KD over Ctrl:	Fold change of the technical replicates of KD over the mean of Ctrl (in log2 values) of the three different time points (24h, 36h, 48h)
	KEGG Pathways:	Annotated KEGG pathways
	KEGG Pathway Identifiers:	Annotated KEGG pathway identifiers
	Accession:	Uniprot accession number
	Description:	Gene description
Sheets:	KEGG Ann. All:	Complete results of the KEGG pathway annotation (protein detected in all three time points; 24h, 36h, 48h)
	KEGG Ann. PCa:	Proteins filtered for the KEGG pathway annotation "prostate cancer"

## Sheet: KEGG Ann. All
Ctrl 1 (24h)	Ctrl 2 (24h)	Ctrl 3 (24h)	KD 1 (24h)	KD 2 (24h)	KD 3 (24h)	FC KD over Ctrl (24h; 1)	FC KD over Ctrl (24h; 2)	FC KD over Ctrl (24h; 3)	Ctrl 1 (36h)	Ctrl 2 (36h)	Ctrl 3 (36h)	KD 1 (36h)	KD 2 (36h)	KD 3 (36h)	FC KD over Ctrl (36h; 1)	FC KD over Ctrl (36h; 2)	FC KD over Ctrl (36h; 3)	Ctrl 1 (48h)	Ctrl 2 (48h)	Ctrl 3 (48h)	KD 1 (48h)	KD 2 (48h)	KD 3 (48h)	FC KD over Ctrl (48h; 1)	FC KD over Ctrl (48h; 2)	FC KD over Ctrl (48h; 3)	KEGG Pathways	KEGG Pathway Identifiers	Accession	Description
0.178753	0.644753	0.359915	-0.074977	0.407924	0.407649	-0.469451	0.0134503	0.0131753	0.232255	0.228098	0.0927478	0.115143	0.214814	0.178209	-0.0692239	0.0304471	-0.00615793	-0.173725	-0.190898	-0.0192333	0.0510867	-0.161478	0.468392	0.179039	-0.0335259	0.596344			A0A0U1RRE5	Negative regulator of P-body association OS=Homo sapiens GN=NBDY PE=1 SV=1
-0.0158681	-0.0989299	-0.0754312	-0.365065	-0.405458	-0.403414	-0.301655	-0.342048	-0.340004	-0.0403038	-0.061794	-0.109637	-0.16429	-0.279319	-0.330927	-0.0937117	-0.208741	-0.260349	0.0493531	-0.0100097	0.0290926	-0.0994573	-0.07931	-0.293089	-0.122269	-0.102122	-0.315901			A0AV96	RNA-binding protein 47 OS=Homo sapiens GN=RBM47 PE=1 SV=2
-0.0249628	-0.0176314	0.0126945	3.17801	0.00687527	-0.163802	3.18798	0.0168418	-0.153835	0.462544	0.298443	0.142039	0.265188	0.132322	0.0594277	-0.0358207	-0.168687	-0.241581	-0.410213	-0.1601	-0.15455	-0.228686	-0.30062	-0.178119	0.012935	-0.058999	0.063502			A0AVF1	Intraflagellar transport protein 56 OS=Homo sapiens GN=TTC26 PE=2 SV=1
-0.143297	-0.0425333	-0.0489415	-0.0835998	-0.0370113	0.0202601	-0.00534253	0.041246	0.0985174	-0.0815756	0.0344021	0.0435217	-0.00302565	0.13934	0.11489	-0.00180838	0.140557	0.116107	-0.0378844	-0.0561453	-0.0464667	0.17361	0.0758344	0.0713653	0.220442	0.122667	0.118197	Ubiquitin mediated proteolysis	ko04120	A0AVT1	Ubiquitin-like modifier-activating enzyme 6 OS=Homo sapiens GN=UBA6 PE=1 SV=1
-0.149968	0.0357054	-0.103986	0.230942	0.246607	0.0787748	0.303692	0.319357	0.151524	-0.0257855	-0.179645	-0.0980886	0.255729	0.136644	0.121747	0.356902	0.237817	0.22292	0.0120887	-0.153299	-0.0355124	0.17923	0.101706	0.265553	0.238138	0.160614	0.324461			A0FGR8	Extended synaptotagmin-2 OS=Homo sapiens GN=ESYT2 PE=1 SV=1
0.198254	0.161251	0.258208	0.0935065	0.178115	0.374631	-0.112398	-0.0277893	0.168727	0.0933946	0.200002	0.259013	0.058735	0.196841	0.285987	-0.125402	0.0127045	0.10185	0.222615	0.0409473	0.0273884	0.181306	0.143716	-0.000665553	0.0843224	0.0467324	-0.0976491			A0JNW5	UHRF1-binding protein 1-like OS=Homo sapiens GN=UHRF1BP1L PE=1 SV=2
-0.0228767	0.05801	0.0695391	0.0620163	0.103587	0.143904	0.0271255	0.0686962	0.109013	-0.11318	0.0478408	0.0558624	-0.0024934	0.0964367	0.130595	0.000665533	0.0995956	0.133754	0.0292217	0.0744769	0.0549879	0.22037	0.13942	0.104195	0.167474	0.0865245	0.0512995			A0MZ66	Shootin-1 OS=Homo sapiens GN=SHTN1 PE=1 SV=4
-0.0957495	-0.14362	-0.0619052	-0.306675	-0.552912	-0.19755	-0.20625	-0.452487	-0.0971251	0.0419104	-0.0418268	-0.148523	0.0885084	-0.0777332	-0.186331	0.137988	-0.0282534	-0.136851	-0.331659	-0.349435	-0.254928	-0.146762	-0.317677	-0.279203	0.165245	-0.00566967	0.0328043	Bacterial invasion of epithelial cells	ko05100	A1A4S6	Rho GTPase-activating protein 10 OS=Homo sapiens GN=ARHGAP10 PE=1 SV=1
0.0211734	0.314742	0.0718055	0.134007	0.24959	0.181238	-0.00189997	0.113683	0.045331	-0.185536	-0.0662445	-0.0398105	-0.156149	-0.129234	-0.0602723	-0.058952	-0.032037	0.0369247	0.0621157	0.155913	0.202958	0.37755	-0.0307648	-0.348775	0.237221	-0.171094	-0.489104			A1IGU5	Rho guanine nucleotide exchange factor 37 OS=Homo sapiens GN=ARHGEF37 PE=2 SV=2
0.250524	0.221102	-0.359992	0.0843772	0.253354	-0.172	0.0471659	0.216143	-0.209211	-0.904393	-0.282177	-0.465484	0.380703	-0.632549	-0.834566	0.931388	-0.0818643	-0.283881	-0.726757	-0.365607	-0.391686	-0.616547	-0.100047	-0.0889006	-0.121864	0.394636	0.405783			A1L020	RNA-binding protein MEX3A OS=Homo sapiens GN=MEX3A PE=1 SV=1
0.0212088	0.221019	-0.0371267	-0.0559085	0.0488703	-0.076264	-0.124276	-0.0194967	-0.144631	-0.0606541	-0.0292164	-0.0935329	-0.126571	-0.0313003	-0.231686	-0.0654365	0.0298342	-0.170552	0.281999	0.0648175	0.274862	0.133088	0.00248656	0.128691	-0.0741382	-0.20474	-0.0785352			A1L0T0	Acetolactate synthase-like protein OS=Homo sapiens GN=ILVBL PE=1 SV=2
0.508637	0.422757	0.0974269	0.564127	0.475797	0.306714	0.221187	0.132857	-0.0362263	0.803253	0.683284	0.482179	0.690187	0.639499	0.518065	0.0339483	-0.0167397	-0.138174	0.724507	0.487594	0.0872678	0.915086	0.67595	0.546113	0.481963	0.242827	0.11299			A1L188	NADH dehydrogenase [ubiquinone] 1 alpha subcomplex assembly factor 8 OS=Homo sapiens GN=NDUFAF8 PE=1 SV=1
0.154855	-0.029363	-0.297749	-0.0144798	-0.524775	-0.435206	0.0429392	-0.467356	-0.377787	-0.188455	0.35235	-0.574774	-0.265724	0.457928	-0.389968	-0.128764	0.594888	-0.253008	-0.0814535	0.0167934	-0.020898	-0.282377	-0.15389	-0.323622	-0.253858	-0.125371	-0.295103			A1L390	Pleckstrin homology domain-containing family G member 3 OS=Homo sapiens GN=PLEKHG3 PE=1 SV=1
-0.202984	-0.211136	-0.027863	-0.18481	-0.0664164	-0.0598681	-0.0374823	0.0809113	0.0874596	-0.0306369	-0.0932629	-0.120256	-0.0263157	-0.164473	-0.0696829	0.0550696	-0.0830877	0.0117024	-0.0316452	-0.032435	-0.103731	0.0582424	0.0136407	0.0535413	0.114179	0.0695778	0.109478			A1X283	SH3 and PX domain-containing protein 2B OS=Homo sapiens GN=SH3PXD2B PE=1 SV=3
-0.139555	-0.744384	-0.4475	-0.650175	-0.418052	-0.0342918	-0.206362	0.025761	0.409521	-0.281546	-0.470831	-0.516815	0.330922	-0.351904	-0.230485	0.753986	0.07116	0.192579	-0.628464	-0.502103	-0.0715665	-0.379659	-0.451532	-0.245267	0.0210522	-0.0508208	0.155444			A2RRD8	Zinc finger protein 320 OS=Homo sapiens GN=ZNF320 PE=1 SV=1
0.145184	0.134633	0.0898654	0.0635828	0.0304442	-0.0681117	-0.0596447	-0.0927833	-0.191339	0.134872	0.12002	0.120653	0.0597892	0.1201	0.0233898	-0.0653925	-0.00508167	-0.101792	0.0179425	0.147228	0.0367261	-0.0174871	0.054929	-0.0371068	-0.084786	-0.0123699	-0.104406			A2RRP1	Neuroblastoma-amplified sequence OS=Homo sapiens GN=NBAS PE=1 SV=2
0.294079	0.211268	0.211102	0.323506	0.246536	0.228488	0.0846897	0.00771967	-0.0103283	0.246391	0.260942	0.282635	0.32139	0.368863	0.343324	0.0580673	0.10554	0.0800013	0.11599	0.22724	0.144851	0.145329	0.277254	0.178789	-0.0173647	0.11456	0.0160953	Aminoacyl-tRNA biosynthesis	ko00970	A2RTX5	Probable threonine--tRNA ligase 2, cytoplasmic OS=Homo sapiens GN=TARSL2 PE=1 SV=1
-0.103996	0.151544	0.358253	0.0508811	0.0879768	0.394097	-0.0843859	-0.0472902	0.25883	-0.0204485	0.15039	0.00490509	-0.284032	-0.21648	-0.436387	-0.328981	-0.261429	-0.481336	-0.18786	-0.186898	0.00432335	0.155112	-0.0433697	-0.0347429	0.27859	0.0801085	0.0887353			A2RU67	Protein FAM234B OS=Homo sapiens GN=FAM234B PE=1 SV=1
-0.020836	-0.044879	-0.0134484	0.0859933	0.0509214	0.115961	0.112381	0.0773092	0.142349	-0.0679749	-0.181062	-0.00681252	0.0471439	-0.0927318	0.0665543	0.132427	-0.00744866	0.151837	-0.216285	0.132759	0.147	0.232178	0.417466	0.395956	0.21102	0.396308	0.374798			A3KMH1	von Willebrand factor A domain-containing protein 8 OS=Homo sapiens GN=VWA8 PE=1 SV=2
-0.214071	-0.142892	-0.145693	-0.156578	-0.0556143	-0.185349	0.010974	0.111938	-0.017797	-0.233332	-0.24165	-0.21553	-0.0540984	-0.0552826	-0.208406	0.176072	0.174888	0.0217647	-0.092744	-0.0213789	-0.0160298	0.0600379	0.122804	0.157398	0.103422	0.166188	0.200782			A3KN83	Protein strawberry notch homolog 1 OS=Homo sapiens GN=SBNO1 PE=1 SV=1
0.143357	0.39581	0.0258182	-0.510275	-0.0414616	-0.0980966	-0.698603	-0.22979	-0.286425	0.421466	0.14914	0.00891371	0.748052	0.434977	0.0579879	0.554879	0.241804	-0.135185	0.0702603	0.360584	-0.273256	0.199851	0.18043	-0.128317	0.147322	0.127901	-0.180846			A4D161	Protein FAM221A OS=Homo sapiens GN=FAM221A PE=1 SV=1
-0.0365839	0.0243942	0.0035682	0.0713758	0.102225	0.0319978	0.0742496	0.105099	0.0348716	0.0458706	-0.0661974	-0.0725009	0.172954	0.108239	-0.0141755	0.203897	0.139182	0.0167671	-0.21747	-0.135467	-0.204009	0.0724557	0.28456	0.0919906	0.258104	0.470209	0.277639			A4D1E9	GTP-binding protein 10 OS=Homo sapiens GN=GTPBP10 PE=1 SV=1
0.0287941	0.167179	0.0110656	0.054755	0.192147	0.0560463	-0.0142579	0.123134	-0.0129666	0.0585584	-0.00153304	-0.0204053	0.309103	0.384241	0.38743	0.296896	0.372034	0.375223	-0.0705965	0.0271463	0.0457581	0.17816	0.104961	0.225583	0.177391	0.104192	0.224814			A4D1P6	WD repeat-containing protein 91 OS=Homo sapiens GN=WDR91 PE=1 SV=2
0.760188	0.287216	0.0778813	1.68144	0.48077	0.883013	1.30634	0.105675	0.507918	0.350764	0.306368	0.342322	0.274506	0.572637	0.432258	-0.0586453	0.239486	0.0991067	0.0874869	0.316276	0.104711	0.38708	0.757181	0.560712	0.217589	0.58769	0.391221			A4D1U4	Protein LCHN OS=Homo sapiens GN=LCHN PE=1 SV=1
-0.105862	-0.0577011	0.107863	-0.107221	-0.0049781	0.00852625	-0.0886543	0.0135886	0.0270929	-0.0525779	0.230052	0.0943635	-0.164931	0.236633	0.303728	-0.255544	0.14602	0.213115	0.026341	0.238526	0.0559202	0.110384	0.27692	0.251533	0.00345493	0.169991	0.144604			A4D2B0	Metallo-beta-lactamase domain-containing protein 1 OS=Homo sapiens GN=MBLAC1 PE=1 SV=1
0.119829	-0.28652	-0.072414	-0.00114813	-0.242582	-0.266675	0.0785535	-0.16288	-0.186973	-0.280254	-0.165875	0.121657	-0.201964	-0.0639939	0.00762887	-0.0938067	0.0441634	0.115786	-0.0146616	0.224381	-0.287732	-0.260336	-0.183138	-0.119736	-0.234332	-0.157134	-0.0937318	Endocytosis	ko04144	A5D8V6	Vacuolar protein sorting-associated protein 37C OS=Homo sapiens GN=VPS37C PE=1 SV=2
-0.0801769	0.0806158	0.188408	0.557259	0.849724	0.905928	0.49431	0.786775	0.842979	0.576135	0.752721	0.704878	0.694026	0.91967	1.08261	0.0161147	0.241759	0.404699	-0.129278	-0.0263609	-0.0793122	0.168073	0.315691	0.101648	0.24639	0.394008	0.179965			A5PLL7	Transmembrane protein 189 OS=Homo sapiens GN=TMEM189 PE=1 SV=3
0.178013	-0.00720678	0.163489	-0.11292	-0.350194	-0.259912	-0.224352	-0.461626	-0.371344	0.313028	-0.0482222	0.345321	0.142979	0.0080802	0.352024	-0.0603966	-0.195295	0.148648	0.0788428	0.205462	0.105131	0.0919266	0.182389	0.0570786	-0.0378853	0.0525771	-0.0727333			A5PLN9	Trafficking protein particle complex subunit 13 OS=Homo sapiens GN=TRAPPC13 PE=1 SV=2
0.00286794	-0.0566018	-0.090321	-0.0768899	0.022306	0.00227281	-0.0288716	0.0703243	0.0502911	0.0418863	-0.0299336	-0.0385787	0.153671	0.0521338	0.0322976	0.162546	0.0610091	0.0411729	-0.148794	-0.0779531	-0.111449	0.0330017	0.0198935	0.00239049	0.145734	0.132626	0.115123	RNA degradation	ko03018	A5YKK6	CCR4-NOT transcription complex subunit 1 OS=Homo sapiens GN=CNOT1 PE=1 SV=2
-0.687353	-0.0139052	-0.432207	-0.627073	0.184512	-0.398164	-0.249251	0.562334	-0.0203423	0.692831	-0.214562	0.392947	0.616979	-0.406867	0.224123	0.326574	-0.697272	-0.0662823	-0.210826	0.498717	0.211076	-0.28066	0.0582854	0.0386938	-0.446982	-0.108037	-0.127629			A5YM69	Rho guanine nucleotide exchange factor 35 OS=Homo sapiens GN=ARHGEF35 PE=1 SV=1
0.936662	0.833764	0.947899	0.936979	0.465739	0.983963	0.0308707	-0.440369	0.0778547	0.686788	0.744735	0.297725	2.04972	1.98814	1.74992	1.4733	1.41172	1.1735	0.227205	0.064218	-0.150034	0.321347	0.0344319	0.0770696	0.274217	-0.0126978	0.0299399			A6H8Y1	Transcription factor TFIIIB component B'' homolog OS=Homo sapiens GN=BDP1 PE=1 SV=3
0.0379592	0.0348458	-5.33915e-05	0.0166679	-0.0806772	0.0783418	-0.00758264	-0.104928	0.0540913	-0.0401009	0.131881	0.0751118	-0.180913	0.00160677	-0.0405173	-0.236544	-0.0540239	-0.0961479	0.0439236	0.0863682	0.247752	0.112029	-0.0460337	0.208132	-0.0139856	-0.172048	0.0821174	Glyoxylate and dicarboxylate metabolism	ko00630	A6NDG6	Glycerol-3-phosphate phosphatase OS=Homo sapiens GN=PGP PE=1 SV=1
-0.0673037	-0.230346	-0.227117	0.112074	-0.0493448	0.0456187	0.286996	0.125577	0.220541	-0.422838	-0.709751	-0.460872	-0.0879104	-0.091644	0.109584	0.443243	0.43951	0.640738	-0.351133	-0.311335	-0.474153	0.0440314	0.0794428	0.0415515	0.422905	0.458316	0.420425			A6NDU8	UPF0600 protein C5orf51 OS=Homo sapiens GN=C5orf51 PE=1 SV=1
0.0989322	0.279483	-0.0655182	0.156499	0.283922	-0.107639	0.0522	0.179623	-0.211938	-0.590072	0.0348349	-0.45087	-0.162183	0.0938587	-0.230406	0.173186	0.429228	0.104963	-0.0279976	-0.0442731	0.0730385	-0.0424121	-0.00898904	-0.0446337	-0.042668	-0.00924497	-0.0448896			A6NFI3	Zinc finger protein 316 OS=Homo sapiens GN=ZNF316 PE=1 SV=1
-1.25776	-1.2547	-1.15063	-1.43176	-1.31627	-1.32106	-0.21073	-0.09524	-0.10003	-1.56079	-1.09317	-1.02914	-1.11784	-0.759694	-0.802555	0.10986	0.468006	0.425145	-1.0651	-1.20823	-1.37151	-1.34088	-1.09571	-1.3175	-0.125933	0.119237	-0.102553	Gap junction;Pathogenic Escherichia coli infection;Phagosome	ko04145;ko04540;ko05130	A6NHL2	Tubulin alpha chain-like 3 OS=Homo sapiens GN=TUBAL3 PE=1 SV=2
-0.0346887	-0.0398716	-0.11257	-0.21609	-0.166873	-0.187146	-0.153713	-0.104496	-0.124769	-0.0281364	-0.0793978	-0.0480228	-0.0638843	-0.075395	-0.151329	-0.012032	-0.0235427	-0.0994767	-0.0991302	-0.0460136	-0.0596401	-0.0839631	-0.105073	-0.108262	-0.0157018	-0.0368117	-0.0400007			A6NHR9	Structural maintenance of chromosomes flexible hinge domain-containing protein 1 OS=Homo sapiens GN=SMCHD1 PE=1 SV=2
-0.478572	-0.122709	-0.274862	-0.498228	-0.180594	-0.204714	-0.20618	0.111454	0.0873337	-0.20467	0.000459466	0.147315	-0.413213	-0.171575	0.0928537	-0.394248	-0.15261	0.111819	-0.0601297	-0.351402	-0.274922	-0.38544	-0.569313	-0.454835	-0.156622	-0.340495	-0.226017			A6NIH7	Protein unc-119 homolog B OS=Homo sapiens GN=UNC119B PE=1 SV=1
-0.416533	-0.362923	-0.346182	-0.181659	0.0456908	0.353524	0.193554	0.420903	0.728737	-0.0987959	-0.293714	-0.30711	0.184881	0.173751	0.0665076	0.418088	0.406958	0.299714	0.130738	-0.627403	-0.657479	0.0931042	0.0997484	0.131045	0.477819	0.484463	0.51576			A6NJ78	Probable methyltransferase-like protein 15 OS=Homo sapiens GN=METTL15 PE=1 SV=1
0.174458	0.220932	-0.0226943	0.123773	0.0548168	-0.0554121	-0.0004589	-0.0694151	-0.179644	0.0668627	0.321381	0.420523	0.165892	0.331629	0.416473	-0.103697	0.0620401	0.146884	-0.098799	0.116709	0.160804	0.0924598	0.220413	0.126685	0.0328885	0.160842	0.0671137			A6NKD9	Coiled-coil domain-containing protein 85C OS=Homo sapiens GN=CCDC85C PE=1 SV=1
0.0728893	0.0826043	0.225705	0.134661	0.0577678	-0.0465829	0.0075948	-0.0692984	-0.173649	-0.152101	0.37894	0.196937	0.0095807	0.24822	0.107272	-0.131678	0.106961	-0.0339867	0.168699	0.210621	0.28513	-0.0407914	-0.069153	0.09364	-0.262275	-0.290636	-0.127843			A7E2V4	Zinc finger SWIM domain-containing protein 8 OS=Homo sapiens GN=ZSWIM8 PE=1 SV=1
-0.0313319	0.452369	-0.0120948	0.244857	0.297635	0.262684	0.108543	0.161321	0.12637	-0.116171	-0.195588	0.00456171	0.0981328	0.176177	0.199856	0.200532	0.278576	0.302255	0.0616015	0.350101	-0.0428788	0.404896	0.134842	0.00594445	0.281955	0.0119008	-0.116997			A7KAX9	Rho GTPase-activating protein 32 OS=Homo sapiens GN=ARHGAP32 PE=1 SV=1
0.000552026	0.146046	0.115048	0.376957	0.593643	0.31622	0.289742	0.506428	0.229005	0.222699	0.361004	0.223242	0.015847	0.190523	0.0555716	-0.253135	-0.0784587	-0.21341	0.300893	0.00369692	0.0313716	-0.0380882	0.239993	-0.059308	-0.150075	0.128006	-0.171295			A8CG34	Nuclear envelope pore membrane protein POM 121C OS=Homo sapiens OX=9606 GN=POM121C PE=1 SV=3
0.000552026	0.146046	0.115048	0.376957	0.593643	0.31622	0.289742	0.506428	0.229005	0.222699	0.361004	0.223242	0.015847	0.190523	0.0555716	-0.253135	-0.0784587	-0.21341	0.300893	0.00369692	0.0313716	-0.0380882	0.239993	-0.059308	-0.150075	0.128006	-0.171295			A8CG34	Nuclear envelope pore membrane protein POM 121C OS=Homo sapiens GN=POM121C PE=1 SV=2
0.0518745	0.0441587	-0.107656	-0.0420157	-0.117735	-0.380038	-0.0381414	-0.113861	-0.376164	0.072654	0.142719	0.0899312	-0.326643	-0.326783	-0.4269	-0.428411	-0.428551	-0.528668	-0.0828174	-0.230008	-0.273388	-0.566791	-0.550729	-0.45599	-0.371387	-0.355325	-0.260586	Peroxisome	ko04146	A8MXV4	Nucleoside diphosphate-linked moiety X motif 19 OS=Homo sapiens GN=NUDT19 PE=1 SV=1
-0.0152386	0.277169	0.157597	0.0654792	0.0837826	0.000798213	-0.0743633	-0.0560599	-0.139044	-0.188674	0.218231	-0.0116026	0.541577	0.342286	0.483005	0.535592	0.336301	0.47702	0.253182	0.551229	0.501905	-0.588315	0.347326	0.060457	-1.02375	-0.0881127	-0.374982			A9UHW6	MIF4G domain-containing protein OS=Homo sapiens GN=MIF4GD PE=1 SV=1
0.721334	0.426443	0.427019	1.24406	0.879245	1.03011	0.719128	0.354313	0.505178	0.386375	1.27328	0.971922	0.839751	0.912561	1.34489	-0.0374413	0.0353687	0.467698	0.28082	-0.222814	0.186373	0.786717	0.981207	1.00813	0.705257	0.899747	0.92667			B2RBV5	Putative MORF4 family-associated protein 1-like protein UPP OS=Homo sapiens PE=1 SV=1
-0.0187195	0.322209	-0.143831	0.274852	0.323401	-0.125343	0.221632	0.270181	-0.178563	-0.00928153	0.244368	0.341958	0.13847	0.249195	0.202851	-0.0538782	0.0568468	0.0105028	-0.128125	-0.0964531	0.025236	0.309868	0.0821639	0.23717	0.376315	0.148611	0.303617			B7ZAP0	Rab GTPase-activating protein 1-like, isoform 10 OS=Homo sapiens GN=RABGAP1L PE=1 SV=1
0.0214952	0.502684	0.277583	0.218016	0.459534	0.423432	-0.0492381	0.19228	0.156178	-0.236285	0.523303	0.682427	0.114267	0.37555	0.436699	-0.208881	0.0524017	0.113551	-0.0713124	-0.383501	0.14543	-0.163242	-0.368178	0.0571683	-0.0601142	-0.26505	0.160296			C9JLW8	Mapk-regulated corepressor-interacting protein 1 OS=Homo sapiens GN=MCRIP1 PE=1 SV=1
0.0888261	0.124157	0.231896	0.159269	0.0375133	0.142787	0.010976	-0.11078	-0.00550603	0.335551	0.153741	0.0963083	0.288629	0.46536	0.340801	0.0934289	0.27016	0.145601	0.0952653	0.0136523	0.0603123	-0.0736351	-0.135099	-0.0409038	-0.130045	-0.191509	-0.0973138			E9PAV3	Nascent polypeptide-associated complex subunit alpha, muscle-specific form OS=Homo sapiens GN=NACA PE=1 SV=1
-0.0520611	0.0845361	-0.131861	0.456713	0.390372	0.161631	0.489842	0.423501	0.19476	0.209656	-0.136185	-0.0702037	0.253462	-0.0533567	0.271684	0.252373	-0.0544458	0.270595	-0.0989056	-0.0720824	0.073329	-0.0878514	-0.0634603	0.0556148	-0.0552984	-0.0309073	0.0881678			E9PRG8	Uncharacterized protein C11orf98 OS=Homo sapiens OX=9606 GN=C11orf98 PE=4 SV=2
-0.0520611	0.0845361	-0.131861	0.456713	0.390372	0.161631	0.489842	0.423501	0.19476	0.209656	-0.136185	-0.0702037	0.253462	-0.0533567	0.271684	0.252373	-0.0544458	0.270595	-0.0989056	-0.0720824	0.073329	-0.0878514	-0.0634603	0.0556148	-0.0552984	-0.0309073	0.0881678			E9PRG8	Uncharacterized protein C11orf98 OS=Homo sapiens GN=C11orf98 PE=4 SV=1
-1.02488	-1.02857	-1.14329	-0.357789	-0.801495	-0.957842	0.707791	0.264085	0.107738	-0.197496	-0.0854536	-0.655406	-0.456859	-0.297325	-0.816669	-0.144074	0.0154602	-0.503884	-0.904774	-1.17012	-0.915289	-1.5231	-1.47686	-1.10551	-0.526372	-0.480132	-0.108782			H7BZ55	Putative ciliary rootlet coiled-coil protein 2 OS=Homo sapiens GN=CROCC2 PE=5 SV=3
0.39856	0.558587	0.400273	-0.812305	-0.41329	-0.409871	-1.26478	-0.865763	-0.862344	-0.398836	-0.324722	-0.249041	-1.105	-0.938788	-1.1921	-0.7808	-0.614588	-0.8679	-0.362363	-0.204903	-0.554721	-0.566762	-0.180682	-0.623344	-0.192766	0.193314	-0.249348			L0R6Q1	SLC35A4 upstream open reading frame protein OS=Homo sapiens GN=SLC35A4 PE=3 SV=1
-0.116541	-0.428943	-0.260713	-0.288887	-0.0261105	-0.101123	-0.0201547	0.242622	0.167609	0.333908	-0.0826786	0.0227448	0.460113	0.12373	0.145522	0.368788	0.0324053	0.0541973	-0.182407	-0.0713585	0.0553669	0.148692	0.183866	0.392033	0.214825	0.249999	0.458166			L0R819	ASNSD1 upstream open reading frame protein OS=Homo sapiens OX=9606 GN=ASDURF PE=1 SV=1
-0.116541	-0.428943	-0.260713	-0.288887	-0.0261105	-0.101123	-0.0201547	0.242622	0.167609	0.333908	-0.0826786	0.0227448	0.460113	0.12373	0.145522	0.368788	0.0324053	0.0541973	-0.182407	-0.0713585	0.0553669	0.148692	0.183866	0.392033	0.214825	0.249999	0.458166			L0R819	ASNSD1 upstream open reading frame protein OS=Homo sapiens GN=ASDURF PE=1 SV=1
0.0151936	0.126533	-0.080021	-0.405569	-0.484769	-0.553269	-0.426138	-0.505338	-0.573838	0.186978	0.0457333	0.136134	-0.0799344	-0.205099	-0.126421	-0.202883	-0.328047	-0.249369	0.0484978	0.0830211	-0.16134	-0.178671	-0.0200147	-0.248879	-0.168731	-0.0100743	-0.238939	Lysosome	ko04142	O00115	Deoxyribonuclease-2-alpha OS=Homo sapiens GN=DNASE2 PE=1 SV=2
0.0854078	-0.068737	-0.00839512	0.0917771	0.0634139	0.0944151	0.0890185	0.0606553	0.0916565	0.0667155	0.0983685	0.0803261	0.286794	0.239027	0.220111	0.204991	0.157224	0.138308	-0.079125	-0.0863538	-0.0914472	0.467881	0.325887	0.436789	0.553523	0.411529	0.522431	Ether lipid metabolism;Peroxisome	ko00565;ko04146	O00116	Alkyldihydroxyacetonephosphate synthase, peroxisomal OS=Homo sapiens GN=AGPS PE=1 SV=1
0.250585	0.42585	0.471558	1.06815	1.07474	1.0729	0.685486	0.692076	0.690236	0.243525	0.0522038	0.412867	0.921617	0.753478	1.01689	0.685418	0.517279	0.780691	0.518875	0.0332122	0.441725	1.03683	0.559353	1.18222	0.705559	0.228082	0.850949			O00124	UBX domain-containing protein 8 OS=Homo sapiens GN=UBXN8 PE=1 SV=2
0.0318485	0.0150303	0.0517373	0.0609268	0.0784834	0.112071	0.0280548	0.0456114	0.079199	0.117984	0.0281954	0.100402	0.0395815	0.0117057	0.0767954	-0.0426123	-0.0704881	-0.0053984	-0.0554111	-0.0686901	-0.10891	-0.0724271	-0.0844039	-0.113097	0.0052433	-0.0067335	-0.0354266			O00139	Kinesin-like protein KIF2A OS=Homo sapiens GN=KIF2A PE=1 SV=3
-0.0167951	0.10785	-0.000103626	-0.160801	-0.0454112	-0.107952	-0.191118	-0.0757283	-0.138269	-0.252598	-0.0815397	-0.0785814	-0.158073	0.0104733	-0.016207	-0.0205	0.148046	0.121366	0.00623937	0.0168582	-0.0172235	-0.168893	-0.0255521	-0.183668	-0.170851	-0.0275101	-0.185626			O00148	ATP-dependent RNA helicase DDX39A OS=Homo sapiens GN=DDX39A PE=1 SV=2
-0.0586255	-0.101698	0.0653511	-0.0156618	-0.0312538	0.0897871	0.0159957	0.000403667	0.121445	-0.128656	-0.0239618	-0.150998	-0.0604158	0.0328036	-0.0696536	0.0407895	0.134009	0.0315517	-0.0599922	-0.0627276	-0.105489	-0.132305	-0.221615	-0.234641	-0.0562354	-0.145545	-0.158571			O00151	PDZ and LIM domain protein 1 OS=Homo sapiens GN=PDLIM1 PE=1 SV=4
-0.066214	-0.107326	-0.0245902	0.0714679	-0.197369	-0.128543	0.137511	-0.131326	-0.0624996	-0.167173	-0.243149	-0.257607	-0.137303	-0.356045	-0.326375	0.08534	-0.133402	-0.103732	-0.129397	-0.083981	-0.196095	-0.195109	-0.135958	-0.0723571	-0.058618	0.000533	0.0641339	Biosynthesis of unsaturated fatty acids	ko01040	O00154	Cytosolic acyl coenzyme A thioester hydrolase OS=Homo sapiens GN=ACOT7 PE=1 SV=3
0.135991	0.0979383	0.120626	0.119825	0.106388	0.152999	0.0016399	-0.0117971	0.0348139	0.239199	0.108207	0.2084	0.0692877	-0.0156738	-0.02812	-0.115981	-0.200942	-0.213389	0.153904	0.183154	0.211328	-0.0338143	0.0547507	0.0598977	-0.21661	-0.128045	-0.122898			O00159	Unconventional myosin-Ic OS=Homo sapiens GN=MYO1C PE=1 SV=4
-0.096445	-0.0862336	0.14585	0.307102	-0.00834766	0.291038	0.319378	0.00392854	0.303314	0.139226	0.396164	0.44698	0.0796623	0.478559	0.348861	-0.247794	0.151102	0.0214043	-0.0091549	-0.0016732	0.0716382	0.0101416	0.0443283	0.00965772	-0.0101284	0.0240583	-0.0106123	SNARE interactions in vesicular transport	ko04130	O00161	Synaptosomal-associated protein 23 OS=Homo sapiens GN=SNAP23 PE=1 SV=1
0.046336	-0.0596461	0.0923893	-0.0756102	-0.172878	0.0239434	-0.10197	-0.199238	-0.00241633	-0.023711	-0.103567	-0.0170725	-0.196207	-0.392159	-0.271932	-0.14809	-0.344042	-0.223815	-0.0157884	-0.0570714	0.170585	-0.207163	-0.154717	-0.17949	-0.239738	-0.187292	-0.212065			O00165	HCLS1-associated protein X-1 OS=Homo sapiens GN=HAX1 PE=1 SV=2
-0.204348	-0.0433384	-0.145773	-0.179051	-0.0569519	-0.102528	-0.0478979	0.0742012	0.0286251	-0.0527886	-0.0708092	0.0197651	0.0588366	-0.139501	0.147977	0.0934475	-0.10489	0.182588	-0.0545593	-0.0273234	-0.0814737	-0.0349736	-0.0793066	-0.061038	0.0194785	-0.0248545	-0.00658587			O00170	AH receptor-interacting protein OS=Homo sapiens GN=AIP PE=1 SV=2
-0.0703881	-0.142206	-0.248303	0.00377978	-0.16765	-0.175385	0.157412	-0.0140176	-0.0217526	0.0587984	0.130562	0.0579956	0.0117433	0.112044	-0.00166716	-0.0707087	0.029592	-0.0841192	0.0759391	0.0216802	0.0597636	-0.0844391	-0.23068	0.00340956	-0.1369	-0.283141	-0.0490514			O00178	GTP-binding protein 1 OS=Homo sapiens GN=GTPBP1 PE=1 SV=3
-0.100794	-0.0392958	-0.083075	-0.000403969	0.0217304	-0.040958	0.0739843	0.0961187	0.0334303	0.0193004	-0.07616	-0.0495441	0.15029	0.165207	0.177346	0.185758	0.200675	0.212814	0.0169679	0.0309509	-0.0110951	0.129999	0.167534	0.11296	0.117724	0.155259	0.100685			O00186	Syntaxin-binding protein 3 OS=Homo sapiens GN=STXBP3 PE=1 SV=2
0.126648	0.0782009	0.0740507	0.0529403	-0.0921515	-0.115019	-0.0400262	-0.185118	-0.207986	0.32354	0.269972	0.224275	0.119643	0.046615	0.0651588	-0.152953	-0.225981	-0.207437	0.286967	0.230621	0.243249	-0.00610945	-0.00704744	0.0183705	-0.259722	-0.26066	-0.235242			O00192	Armadillo repeat protein deleted in velo-cardio-facial syndrome OS=Homo sapiens GN=ARVCF PE=1 SV=1
0.22819	0.091888	0.0383159	0.0317706	-0.193925	-0.159375	-0.087694	-0.31339	-0.27884	0.264131	0.196841	0.260583	-0.0699951	-0.0400482	-0.075007	-0.310513	-0.280567	-0.315525	0.100905	0.135637	-0.0213455	-0.0648737	0.0746105	-0.0631197	-0.136606	0.00287833	-0.134852			O00193	Small acidic protein OS=Homo sapiens GN=SMAP PE=1 SV=1
-0.52344	-0.356218	-0.70334	0.241919	0.0969413	-0.339594	0.769585	0.624607	0.188072	-0.806445	-0.784616	-0.690717	-0.491703	-0.596138	-0.685155	0.26889	0.164455	0.0754377	-0.570073	-0.687911	-0.552516	-0.42107	-0.869518	-0.78382	0.18243	-0.266018	-0.18032	Pancreatic secretion	ko04972	O00194	Ras-related protein Rab-27B OS=Homo sapiens GN=RAB27B PE=1 SV=4
-0.000216426	-0.0560643	-0.049455	-0.019271	-0.0152524	0.0350389	0.0159742	0.0199928	0.0702841	-0.0115799	0.0287484	0.013113	-0.0364437	0.113145	-0.0145702	-0.0465375	0.103051	-0.024664	-0.00150613	0.0484107	-0.089304	-0.00269767	0.0225709	-0.0238437	0.0114355	0.036704	-0.00971056	Lysosome	ko04142	O00203	AP-3 complex subunit beta-1 OS=Homo sapiens GN=AP3B1 PE=1 SV=3
-0.0511922	0.0674733	-0.111404	0.00768887	0.0651786	-0.141272	0.0393965	0.0968862	-0.109564	0.077085	0.0512555	0.108941	0.242701	0.149028	0.164235	0.163607	0.0699342	0.0851412	-0.0816973	0.0476686	-0.0117712	0.237518	0.303004	0.184587	0.252785	0.318271	0.199854	Steroid hormone biosynthesis;Sulfur metabolism	ko00140;ko00920	O00204	Sulfotransferase family cytosolic 2B member 1 OS=Homo sapiens GN=SULT2B1 PE=1 SV=2
-0.131824	-0.2325	0.0809348	0.0838051	0.43298	0.396698	0.178268	0.527443	0.491161	0.0463202	-0.0593379	0.142373	0.297986	0.220523	0.462452	0.254868	0.177405	0.419334	0.396351	0.148897	0.074717	0.29871	0.111309	-0.0470406	0.092055	-0.095346	-0.253696			O00214	Galectin-8 OS=Homo sapiens GN=LGALS8 PE=1 SV=4
0.0452478	0.0540803	0.122856	0.319337	0.345325	0.341856	0.245276	0.271264	0.267795	0.0641073	0.0778861	0.0612576	-0.00314839	-0.00134741	-0.0637288	-0.0708987	-0.0690977	-0.131479	-0.00524581	-0.180936	0.216748	0.0738562	-0.0152223	0.0877886	0.0636675	-0.025411	0.0775999	Alzheimer's disease;Huntington's disease;Oxidative phosphorylation;Parkinson's disease	ko00190;ko05010;ko05012;ko05016	O00217	NADH dehydrogenase [ubiquinone] iron-sulfur protein 8, mitochondrial OS=Homo sapiens GN=NDUFS8 PE=1 SV=1
0.083599	0.0112251	0.0298829	0.29056	0.0387636	-0.0974328	0.248991	-0.0028054	-0.139002	-0.507271	-0.517246	-0.506266	-0.296957	-0.0154493	0.047667	0.213304	0.494812	0.557928	-0.507545	-0.0675046	-0.296707	-0.195354	0.150385	-0.170647	0.0952315	0.440971	0.119939	Apoptosis;Cytokine-cytokine receptor interaction;Measles;Natural killer cell mediated cytotoxicity	ko04060;ko04210;ko04650;ko05162	O00220	Tumor necrosis factor receptor superfamily member 10A OS=Homo sapiens GN=TNFRSF10A PE=1 SV=3
-0.880017	0.0838308	-0.140192	-0.530392	-0.165276	-0.193303	-0.218266	0.14685	0.118823	0.249007	-0.191905	-0.113355	0.187706	-0.162242	0.299496	0.206457	-0.143491	0.318247	0.239006	0.305894	0.135201	0.281705	0.694966	0.272992	0.0550047	0.468266	0.0462917	Adipocytokine signaling pathway;B cell receptor signaling pathway;Neurotrophin signaling pathway;T cell receptor signaling pathway	ko04660;ko04662;ko04722;ko04920	O00221	NF-kappa-B inhibitor epsilon OS=Homo sapiens GN=NFKBIE PE=1 SV=3
-0.039786	-0.0172291	-0.00830773	-0.0420601	-0.108212	-0.089271	-0.0202858	-0.0864377	-0.0674967	-0.0825455	-0.107876	-0.0604303	-0.025472	-0.00366053	0.0616228	0.0581453	0.0799567	0.14524	0.026525	-0.00212818	0.0676442	0.0623602	0.0821083	0.0581533	0.0316799	0.051428	0.027473	Proteasome	ko03050	O00231	26S proteasome non-ATPase regulatory subunit 11 OS=Homo sapiens GN=PSMD11 PE=1 SV=3
0.0587527	0.147149	0.117159	0.113141	0.108308	0.0856229	0.0054541	0.0006211	-0.022064	0.0538215	0.24474	0.122904	0.100277	0.202902	0.261042	-0.0402115	0.0624135	0.120553	0.136106	0.0581882	0.10619	0.203738	0.136078	0.19405	0.103577	0.0359166	0.0938886	Proteasome	ko03050	O00232	26S proteasome non-ATPase regulatory subunit 12 OS=Homo sapiens GN=PSMD12 PE=1 SV=3
0.0184439	-0.108716	0.0570654	-0.0393398	-0.0638522	0.177821	-0.0282709	-0.0527833	0.18889	0.065535	0.164795	0.0753334	0.10881	0.154211	0.17625	0.0069222	0.0523232	0.0743622	0.113587	0.0599431	-0.0302002	0.062933	0.00226216	-0.0945668	0.0151564	-0.0455145	-0.142343			O00233	26S proteasome non-ATPase regulatory subunit 9 OS=Homo sapiens GN=PSMD9 PE=1 SV=3
-0.236455	-0.142176	-0.0729986	0.148953	-0.178708	-0.1479	0.299496	-0.0281648	0.0026432	-0.0422334	-0.0671976	-0.115373	0.0895586	0.0446927	0.0397977	0.164493	0.119627	0.114732	-0.0817737	-0.044615	-0.060821	0.126281	0.0109744	0.0332624	0.188684	0.0733776	0.0956656	Mineral absorption	ko04978	O00244	Copper transport protein ATOX1 OS=Homo sapiens GN=ATOX1 PE=1 SV=1
-0.0889496	-0.315022	-0.250312	-0.483089	-0.397904	-0.385239	-0.264994	-0.179809	-0.167144	-0.144679	-0.460218	-0.454625	-0.352864	-0.439899	-0.414594	0.00031	-0.086725	-0.06142	-0.231952	-0.131835	-0.24268	-0.532596	-0.519526	-0.0774629	-0.33044	-0.31737	0.124693			O00255	Menin OS=Homo sapiens GN=MEN1 PE=1 SV=4
0.118593	-0.00556308	0.166492	0.168515	8.19079e-05	0.0853651	0.075341	-0.0930921	-0.00780887	0.258048	0.314168	0.339022	0.187419	0.272325	0.22757	-0.116327	-0.031421	-0.076176	0.738623	0.00599278	0.0102216	0.848007	0.632469	0.734607	0.596395	0.380857	0.482995			O00257	E3 SUMO-protein ligase CBX4 OS=Homo sapiens GN=CBX4 PE=1 SV=3
-0.302422	0.168696	-0.13078	0.259432	0.315055	0.435244	0.347601	0.403224	0.523413	0.110546	-0.145972	-0.00162115	0.14252	0.0734127	0.131121	0.154869	0.0857617	0.14347	0.0964054	0.291401	0.171563	0.278996	0.560975	0.40068	0.0925395	0.374519	0.214224			O00258	Tail-anchored protein insertion receptor WRB OS=Homo sapiens GN=WRB PE=1 SV=2
0.129804	-0.0705981	-0.0528039	0.0701069	-0.0249765	0.0124772	0.0679729	-0.0271105	0.0103432	0.0417991	-0.146801	0.00899286	-0.188712	-0.39459	-0.172716	-0.156709	-0.362587	-0.140713	0.108874	-0.00936851	0.0807647	-0.00238504	0.0623417	0.0665746	-0.0624751	0.00225164	0.00648454			O00264	Membrane-associated progesterone receptor component 1 OS=Homo sapiens GN=PGRMC1 PE=1 SV=3
0.058476	-0.180608	-0.0386072	-0.0770211	-0.215735	0.0104494	-0.0234414	-0.162155	0.0640291	-0.000102534	-0.10496	0.00796217	0.0559949	-0.0433894	-0.0589911	0.0883617	-0.0110226	-0.0266243	-0.131922	-0.103409	-0.104887	-0.0226934	-0.0974666	-0.0732321	0.0907126	0.0159394	0.0401739			O00267	Transcription elongation factor SPT5 OS=Homo sapiens GN=SUPT5H PE=1 SV=1
0.147576	0.0342502	-0.0776923	-0.255528	-0.112678	0.031163	-0.290239	-0.147389	-0.0035483	-0.306931	-0.00598448	0.0363843	-0.402622	0.0853918	-0.479979	-0.310445	0.177569	-0.387802	0.0538532	-0.0277077	-0.0344118	-0.295194	-0.506909	-0.218806	-0.292439	-0.504154	-0.216051	Basal transcription factors;Huntington's disease	ko03022;ko05016	O00268	Transcription initiation factor TFIID subunit 4 OS=Homo sapiens GN=TAF4 PE=1 SV=2
-0.0945358	0.0402022	0.0746316	-0.0132986	-0.0401548	0.107063	-0.0200646	-0.0469208	0.100297	-0.0453152	0.0565295	-0.06836	0.080515	0.225385	0.0139377	0.0995636	0.244434	0.0329863	0.00715999	0.150535	0.0409126	-0.0720503	0.0874968	0.0716159	-0.138253	0.0212943	0.00541337	Apoptosis	ko04210	O00273	DNA fragmentation factor subunit alpha OS=Homo sapiens GN=DFFA PE=1 SV=1
-0.601732	0.115472	0.568382	-0.286134	-0.273409	0.423295	-0.313508	-0.300783	0.395921	-0.0683069	-0.0808787	0.00372499	-0.460341	-0.331964	-0.476489	-0.411854	-0.283477	-0.428002	0.0344605	-0.0591397	-0.0872798	-0.268496	-0.234022	-0.559006	-0.231176	-0.196702	-0.521686	Antigen processing and presentation;ko05152;Primary immunodeficiency	ko04612;ko05152;ko05340	O00287	Regulatory factor X-associated protein OS=Homo sapiens GN=RFXAP PE=1 SV=1
-0.379209	-0.325384	-0.515738	-0.465484	-0.344492	-0.564309	-0.058707	0.062285	-0.157532	-0.29742	-0.0684714	-0.116772	-0.535888	-0.460611	-0.405225	-0.375	-0.299723	-0.244337	-0.289795	-0.399485	-0.317387	-0.499486	-0.498753	-0.597256	-0.16393	-0.163197	-0.2617	Huntington's disease	ko05016	O00291	Huntingtin-interacting protein 1 OS=Homo sapiens GN=HIP1 PE=1 SV=5
0.188257	0.114729	0.180321	0.0575487	0.0137161	-0.00575736	-0.103554	-0.147386	-0.16686	0.234982	-0.026489	0.0502776	0.158073	0.0467331	0.145344	0.0718161	-0.0395238	0.0590871	0.163472	0.203203	0.13104	0.101571	0.0278155	0.048169	-0.064334	-0.13809	-0.117736			O00299	Chloride intracellular channel protein 1 OS=Homo sapiens GN=CLIC1 PE=1 SV=4
-0.0218258	0.115642	-0.0154734	0.0657042	0.111054	0.0412023	0.0395899	0.0849397	0.015088	0.0239162	-0.0779865	-0.0729486	0.137656	0.0635669	0.100746	0.179996	0.105907	0.143086	-0.030579	-0.0784267	0.0728447	-0.0622097	0.0953519	0.0297506	-0.050156	0.107406	0.0418043	RNA transport	ko03013	O00303	Eukaryotic translation initiation factor 3 subunit F OS=Homo sapiens GN=EIF3F PE=1 SV=1
0.224819	0.0731263	0.260965	0.219086	0.275284	0.137138	0.0327826	0.0889806	-0.0491654	0.00764511	0.0621133	0.143923	0.233121	0.308017	0.210377	0.161894	0.23679	0.13915	0.0657775	-0.171926	0.0912657	-0.0692656	0.18995	0.129122	-0.0643047	0.194911	0.134083	Ubiquitin mediated proteolysis	ko04120	O00308	NEDD4-like E3 ubiquitin-protein ligase WWP2 OS=Homo sapiens GN=WWP2 PE=1 SV=2
0.211469	0.390565	0.0151178	-0.213644	-0.245027	-0.608898	-0.419361	-0.450744	-0.814615	-0.00183152	0.151878	0.218531	-1.44884	-1.09722	-1.55092	-1.5717	-1.22008	-1.67378	0.314427	-0.765424	-0.318272	0.0261225	-0.694716	-0.84735	0.282546	-0.438293	-0.590927	Cell cycle;Cell cycle - yeast;Meiosis - yeast	ko04110;ko04111;ko04113	O00311	Cell division cycle 7-related protein kinase OS=Homo sapiens GN=CDC7 PE=1 SV=1
0.125759	0.145675	0.131916	0.255889	0.203769	0.29497	0.121439	0.069319	0.16052	0.0761938	-0.0339535	0.101531	0.134669	0.135589	0.184419	0.0867452	0.0876652	0.136495	0.073863	0.149657	0.0945208	0.161931	0.170283	0.178578	0.0559174	0.0642694	0.0725644	Acute myeloid leukemia;Aldosterone-regulated sodium reabsorption;Amoebiasis;Apoptosis;B cell receptor signaling pathway;Bacterial invasion of epithelial cells;Carbohydrate digestion and absorption;Chagas disease (American trypanosomiasis);Chemokine signaling pathway;Chronic myeloid leukemia;Colorectal cancer;Endometrial cancer;ErbB signaling pathway;Fc epsilon RI signaling pathway;Fc gamma R-medi…	ko00562;ko04012;ko04062;ko04070;ko04150;ko04210;ko04370;ko04380;ko04510;ko04620;ko04630;ko04650;ko04660;ko04662;ko04664;ko04666;ko04670;ko04722;ko04810;ko04910;ko04914;ko04930;ko04960;ko04973;ko05100;ko05142;ko05145;ko05146;ko05160;ko05162;ko05200;ko05210;ko05211;ko05212;ko05213;ko05214;ko05215;ko05218;ko05220;ko05221;ko05222;ko05223	O00329	Phosphatidylinositol 4,5-bisphosphate 3-kinase catalytic subunit delta isoform OS=Homo sapiens GN=PIK3CD PE=1 SV=2
0.0112945	-0.162187	-0.0840272	0.260359	0.162692	0.280521	0.338666	0.240999	0.358828	-0.141098	-0.265518	-0.272547	0.14011	0.0483014	-0.011897	0.366498	0.274689	0.214491	-0.284813	-0.227853	-0.415639	0.201245	0.193144	-0.0399364	0.51068	0.502579	0.269499	Citrate cycle (TCA cycle);Glycolysis / Gluconeogenesis;Pyruvate metabolism	ko00010;ko00020;ko00620	O00330	Pyruvate dehydrogenase protein X component, mitochondrial OS=Homo sapiens GN=PDHX PE=1 SV=3
0.253589	0.368377	0.202119	0.295268	0.231275	0.263208	0.020573	-0.04342	-0.011487	0.260022	0.147595	0.186325	0.509143	0.364912	0.314584	0.311162	0.166931	0.116603	0.105951	-0.0452094	0.0910137	0.305447	0.0999198	0.24789	0.254862	0.0493347	0.197305			O00391	Sulfhydryl oxidase 1 OS=Homo sapiens GN=QSOX1 PE=1 SV=3
-0.215604	-0.305678	-0.18733	0.360444	0.29429	0.434736	0.596648	0.530494	0.67094	-0.225942	0.132836	0.23556	-0.122883	-0.0308473	-0.0896143	-0.170368	-0.078332	-0.137099	-0.0654854	-0.0543858	-0.043583	0.0229269	-0.207404	-0.167911	0.0774116	-0.152919	-0.113426	Vasopressin-regulated water reabsorption	ko04962	O00399	Dynactin subunit 6 OS=Homo sapiens GN=DCTN6 PE=1 SV=1
-0.534514	-0.499367	-0.516459	-0.463347	-0.377487	-0.346432	0.053433	0.139293	0.170348	-0.0613231	0.012257	-0.100209	-0.39909	-0.115638	-0.178681	-0.349332	-0.0658796	-0.128923	0.401249	0.313223	0.305678	0.197961	0.315843	0.304782	-0.142089	-0.024207	-0.035268	Glycosphingolipid biosynthesis - ganglio series	ko00604	O00400	Acetyl-coenzyme A transporter 1 OS=Homo sapiens GN=SLC33A1 PE=1 SV=1
-0.148737	-0.243539	-0.0843299	0.0971686	0.182703	0.378437	0.256037	0.341572	0.537306	-0.0436295	0.409583	0.234557	-0.238889	-0.123291	0.0985982	-0.439059	-0.323461	-0.101572	0.395895	0.652432	0.50116	0.129952	0.0874684	0.172147	-0.386544	-0.429027	-0.344349	Adherens junction;Bacterial invasion of epithelial cells;Chemokine signaling pathway;Fc gamma R-mediated phagocytosis;Pathogenic Escherichia coli infection;Regulation of actin cytoskeleton;Shigellosis	ko04062;ko04520;ko04666;ko04810;ko05100;ko05130;ko05131	O00401	Neural Wiskott-Aldrich syndrome protein OS=Homo sapiens GN=WASL PE=1 SV=2
-0.0693296	-0.109394	0.0129238	-0.126441	-0.0762223	-0.0333838	-0.0711744	-0.0209557	0.0218828	-0.102405	-0.139246	-0.131861	-0.0844405	-0.0800929	-0.0967255	0.0400635	0.0444111	0.0277785	-0.0775664	-0.110683	-0.0766174	-0.0891376	-0.00367197	-0.0597735	-0.000848667	0.084617	0.0285154			O00410	Importin-5 OS=Homo sapiens GN=IPO5 PE=1 SV=4
0.0761015	0.185613	-0.173982	0.206443	0.350747	0.277285	0.177199	0.321503	0.248041	-0.105632	-0.171955	-0.179429	-0.0497774	0.00375881	-0.215047	0.102561	0.156097	-0.0627083	-0.120228	-0.272399	-0.293647	0.102729	-0.0754145	-0.0727107	0.331487	0.153344	0.156047			O00411	DNA-directed RNA polymerase, mitochondrial OS=Homo sapiens GN=POLRMT PE=1 SV=2
-0.201168	-0.225272	-0.061722	-0.33216	-0.500431	-0.568178	-0.169439	-0.33771	-0.405457	-0.026077	-0.131074	-0.0648128	-0.220872	-0.30492	-0.218186	-0.146884	-0.230932	-0.144198	-0.0615072	0.110392	0.0635062	-0.262769	-0.172817	-0.11158	-0.300233	-0.210281	-0.149044			O00418	Eukaryotic elongation factor 2 kinase OS=Homo sapiens GN=EEF2K PE=1 SV=2
-0.0662679	0.0228864	0.0221866	0.0412865	0.285123	0.324491	0.0483515	0.292188	0.331556	0.124346	0.110838	0.192478	-0.0239771	-0.0959926	0.0767799	-0.166531	-0.238547	-0.0657741	0.0739843	0.0143275	-0.0389848	-0.00678058	-0.217103	-0.00866742	-0.0232229	-0.233545	-0.0251098	mRNA surveillance pathway;RNA transport	ko03013;ko03015	O00422	Histone deacetylase complex subunit SAP18 OS=Homo sapiens GN=SAP18 PE=1 SV=1
0.326346	-0.0764147	4.61518	0.611543	4.32497	0.642384	-1.01016	2.70327	-0.97932	0.254226	0.105832	0.201101	0.280712	0.14028	0.165439	0.093659	-0.046773	-0.021614	0.169261	0.231587	0.127425	0.26808	0.112251	-0.00678734	0.091989	-0.06384	-0.182878			O00423	Echinoderm microtubule-associated protein-like 1 OS=Homo sapiens GN=EML1 PE=1 SV=3
0.269136	0.224474	0.257863	0.319959	0.256692	0.34598	0.069468	0.006201	0.095489	-0.035874	0.106807	0.070106	0.0966864	0.217813	0.122955	0.0496734	0.1708	0.075942	0.0283459	0.124252	0.10439	0.348377	0.343166	0.382595	0.262714	0.257503	0.296932			O00425	Insulin-like growth factor 2 mRNA-binding protein 3 OS=Homo sapiens GN=IGF2BP3 PE=1 SV=2
0.0757062	0.0574403	0.0052233	0.00776062	-0.0769315	-0.0406482	-0.0383626	-0.123055	-0.0867715	0.0270705	-0.00657094	0.0278884	0.11725	0.0626771	0.0695527	0.101121	0.0465478	0.0534234	-0.0334469	-0.0100328	0.00720646	0.0696567	0.101874	0.0816625	0.0817478	0.113965	0.0937536	Bacterial invasion of epithelial cells;Endocrine and other factor-regulated calcium reabsorption;Endocytosis;Fc gamma R-mediated phagocytosis	ko04144;ko04666;ko04961;ko05100	O00429	Dynamin-1-like protein OS=Homo sapiens GN=DNM1L PE=1 SV=2
0.213446	0.130451	0.145663	0.136876	0.0546436	0.0221869	-0.0263107	-0.108543	-0.141	0.187238	0.13449	-0.0238039	0.194976	0.203247	0.0812407	0.095668	0.103939	-0.0180673	0.265796	0.0891354	0.0873281	0.234017	0.173552	0.223458	0.0865972	0.0261322	0.0760382			O00442	RNA 3'-terminal phosphate cyclase OS=Homo sapiens GN=RTCA PE=1 SV=1
-0.0453186	-0.0364369	-0.0156213	-0.149885	-0.0313207	-0.128353	-0.117426	0.00113823	-0.0958941	-0.121531	0.0502932	-0.161599	-0.127157	-0.0571462	-0.085546	-0.0495447	0.0204661	-0.00793373	-0.00801374	0.144972	0.0780983	-0.148012	0.0855309	0.0873505	-0.219698	0.0138454	0.015665	Inositol phosphate metabolism;Phosphatidylinositol signaling system	ko00562;ko04070	O00443	Phosphatidylinositol 4-phosphate 3-kinase C2 domain-containing subunit alpha OS=Homo sapiens GN=PIK3C2A PE=1 SV=2
0.0112939	0.0403822	0.207183	0.118788	0.123647	0.038383	0.0325016	0.0373606	-0.0479034	-0.0868074	-0.118277	-0.106202	-0.0113031	0.264532	-0.000610948	0.092459	0.368294	0.103151	0.0475675	0.018252	0.0389207	0.279366	0.296639	0.33953	0.244453	0.261726	0.304617	Acute myeloid leukemia;Aldosterone-regulated sodium reabsorption;Amoebiasis;Apoptosis;B cell receptor signaling pathway;Bacterial invasion of epithelial cells;Carbohydrate digestion and absorption;Chagas disease (American trypanosomiasis);Chemokine signaling pathway;Chronic myeloid leukemia;Colorectal cancer;Endometrial cancer;ErbB signaling pathway;Fc epsilon RI signaling pathway;Fc gamma R-medi…	ko04012;ko04062;ko04070;ko04150;ko04210;ko04370;ko04380;ko04510;ko04620;ko04630;ko04650;ko04660;ko04662;ko04664;ko04666;ko04670;ko04722;ko04810;ko04910;ko04914;ko04930;ko04960;ko04973;ko05100;ko05142;ko05145;ko05146;ko05160;ko05162;ko05200;ko05210;ko05211;ko05212;ko05213;ko05214;ko05215;ko05218;ko05220;ko05221;ko05222;ko05223	O00459	Phosphatidylinositol 3-kinase regulatory subunit beta OS=Homo sapiens GN=PIK3R2 PE=1 SV=2
-0.234793	-0.140015	-0.112994	0.0798475	0.126519	0.130716	0.242448	0.28912	0.293317	-0.348035	-0.0771734	-0.34869	-0.0521494	0.0450334	0.0802275	0.205817	0.303	0.338194	-0.25396	-0.446748	-0.29081	-0.0194478	-0.0261261	-0.0603938	0.311058	0.30438	0.270112			O00461	Golgi integral membrane protein 4 OS=Homo sapiens GN=GOLIM4 PE=1 SV=1
0.027772	-0.0178996	-0.0592376	-0.0832702	-0.136906	-0.102949	-0.0668151	-0.120451	-0.0864939	-0.0952021	0.0892857	0.0129188	-0.0700453	0.00490976	0.0436595	-0.0723794	0.00257563	0.0413254	0.232076	0.142521	0.049617	0.127701	0.0631187	0.0503642	-0.0137037	-0.078286	-0.0910405	Lysosome;Other glycan degradation	ko00511;ko04142	O00462	Beta-mannosidase OS=Homo sapiens GN=MANBA PE=2 SV=3
0.100705	0.075422	-0.0777818	-0.142356	0.078067	0.0748244	-0.175138	0.0452853	0.0420427	0.130728	0.542249	0.258522	0.312825	0.510818	0.532652	0.00232533	0.200318	0.222152	0.113898	0.250195	0.470501	0.291427	0.236507	0.382136	0.013229	-0.041691	0.103938	ECM-receptor interaction	ko04512	O00468	Agrin OS=Homo sapiens OX=9606 GN=AGRN PE=1 SV=6
0.100705	0.075422	-0.0777818	-0.142356	0.078067	0.0748244	-0.175138	0.0452853	0.0420427	0.130728	0.542249	0.258522	0.312825	0.510818	0.532652	0.00232533	0.200318	0.222152	0.113898	0.250195	0.470501	0.291427	0.236507	0.382136	0.013229	-0.041691	0.103938	ECM-receptor interaction	ko04512	O00468	Agrin OS=Homo sapiens GN=AGRN PE=1 SV=5
0.0884186	0.131817	0.00282455	-0.294318	-0.14955	-0.0527682	-0.368671	-0.223903	-0.127122	0.0164951	0.0571443	0.0231548	0.139622	0.0781222	0.0665218	0.107357	0.0458575	0.0342571	0.0410955	0.0124575	0.0472853	0.0789694	0.126619	0.170471	0.0453566	0.0930062	0.136858			O00471	Exocyst complex component 5 OS=Homo sapiens GN=EXOC5 PE=1 SV=1
0.466707	1.04446	1.15724	0.527783	1.04139	0.799376	-0.361686	0.151921	-0.090093	0.455599	0.537073	0.392	0.961999	0.751965	0.647097	0.500442	0.290408	0.18554	0.458364	1.09385	0.458059	0.0191501	1.09344	0.477498	-0.650941	0.423349	-0.192593			O00479	High mobility group nucleosome-binding domain-containing protein 4 OS=Homo sapiens GN=HMGN4 PE=1 SV=3
-0.216772	-0.38458	-0.171539	-0.0888461	0.161412	0.00767965	0.168784	0.419042	0.26531	-0.031112	0.0117971	-0.00695098	-0.193574	-0.301598	-0.208959	-0.184819	-0.292843	-0.200204	-0.0064915	0.177672	-0.0609789	-0.12835	0.0242599	0.221704	-0.165084	-0.012474	0.18497	Alzheimer's disease;Huntington's disease;Oxidative phosphorylation;Parkinson's disease	ko00190;ko05010;ko05012;ko05016	O00483	Cytochrome c oxidase subunit NDUFA4 OS=Homo sapiens GN=NDUFA4 PE=1 SV=1
0.128499	0.0775667	0.0556944	0.135495	-0.00750435	0.082947	0.0482416	-0.0947577	-0.00430637	0.115738	0.133493	0.0920315	0.142829	0.100803	0.162098	0.0290748	-0.0129512	0.0483438	-0.0105731	0.0281924	0.0538194	0.174535	-0.00722433	0.133993	0.150722	-0.0310372	0.11018	Proteasome	ko03050	O00487	26S proteasome non-ATPase regulatory subunit 14 OS=Homo sapiens GN=PSMD14 PE=1 SV=1
-0.199372	-0.0483458	-0.0527152	0.0493865	0.320159	0.401191	0.149531	0.420303	0.501335	0.263049	0.0753321	-0.0942952	0.586637	0.210662	0.32413	0.505275	0.1293	0.242768	-0.166923	-0.187928	-0.213618	-0.0734074	-0.00662059	0.0229533	0.116082	0.182869	0.212443			O00488	Zinc finger protein 593 OS=Homo sapiens GN=ZNF593 PE=1 SV=2
0.0223876	-0.162519	0.053232	0.0271081	-0.00918073	0.0629754	0.0560746	0.0197857	0.0919419	-0.234709	-0.137097	-0.1544	-0.0367426	0.2327	0.0987002	0.138659	0.408102	0.274102	0.0302857	-0.103078	-0.239211	0.0984866	0.00619167	0.0674957	0.202488	0.110193	0.171497			O00499	Myc box-dependent-interacting protein 1 OS=Homo sapiens GN=BIN1 PE=1 SV=1
-0.0560325	-0.0549897	-0.0211244	0.192603	-0.0757095	-0.118639	0.236652	-0.0316606	-0.0745901	-0.126607	0.216931	0.124353	0.057876	0.202871	0.0552719	-0.013683	0.131312	-0.0162871	0.109215	0.0300658	-0.162384	-0.00350077	-0.134865	-0.0320845	0.0042003	-0.127164	-0.0243834			O00505	Importin subunit alpha-4 OS=Homo sapiens GN=KPNA3 PE=1 SV=2
0.133502	0.0174542	0.20414	-0.169733	-0.00466787	-0.0336789	-0.288098	-0.123033	-0.152044	-0.119016	-0.0373193	0.0386765	-0.227148	-0.172271	-0.132814	-0.187928	-0.133051	-0.0935944	0.0895807	0.0821191	0.0880771	-0.215779	-0.37025	-0.217623	-0.302371	-0.456842	-0.304215			O00506	Serine/threonine-protein kinase 25 OS=Homo sapiens GN=STK25 PE=1 SV=1
-0.149374	-0.13095	0.0146858	-0.0883039	-0.216645	-0.0588536	0.000242167	-0.128099	0.0296925	-0.206552	-0.122801	-0.0752166	-0.0403591	0.0217279	-0.0340314	0.0944974	0.156584	0.100825	-0.169523	-0.176753	-0.239519	0.0764936	0.1037	0.13127	0.271759	0.298965	0.326535			O00507	Probable ubiquitin carboxyl-terminal hydrolase FAF-Y OS=Homo sapiens GN=USP9Y PE=2 SV=2
0.0497156	-0.018222	-0.128707	0.778764	0.941393	0.851161	0.811168	0.973797	0.883565	-0.0312139	0.171383	0.150206	0.488568	0.596456	0.624637	0.391776	0.499664	0.527845	0.0655825	-0.0668614	-0.0448621	0.571334	0.633891	0.481973	0.586714	0.649271	0.497353			O00512	B-cell CLL/lymphoma 9 protein OS=Homo sapiens GN=BCL9 PE=1 SV=4
0.024773	-0.0798369	-0.0194252	-0.250135	-0.371412	-0.288779	-0.225305	-0.346582	-0.263949	-0.119027	-0.0392262	-0.138045	-0.260635	-0.230875	-0.454451	-0.161869	-0.132109	-0.355685	0.0421023	-0.121682	-0.0773359	-0.27978	-0.355565	-0.324731	-0.227475	-0.30326	-0.272426			O00515	Ladinin-1 OS=Homo sapiens GN=LAD1 PE=1 SV=2
0.127972	0.0491988	0.0852683	0.353553	0.207835	0.165382	0.266073	0.120355	0.0779023	0.141037	0.0684708	-0.0528819	0.290776	0.147382	0.0171594	0.238567	0.0951734	-0.0350492	0.152563	0.103041	0.0774963	0.264325	0.272907	0.245115	0.153292	0.161874	0.134082			O00519	Fatty-acid amide hydrolase 1 OS=Homo sapiens GN=FAAH PE=1 SV=2
0.313026	-1.10717	-0.798869	-0.499993	-0.731548	-0.727352	0.0310113	-0.200544	-0.196348	-0.187659	-0.253532	-0.320929	-0.376606	-0.522999	-0.537116	-0.122566	-0.268959	-0.283076	0.29823	0.200709	0.0199386	0.13377	0.130574	-0.0168529	-0.0391892	-0.0423852	-0.189812			O00522	Krev interaction trapped protein 1 OS=Homo sapiens GN=KRIT1 PE=1 SV=2
0.224416	0.401135	0.297336	0.259059	0.306968	0.252317	-0.04857	-0.000661	-0.055312	0.116124	0.0494547	0.0935243	0.278376	0.262822	0.221572	0.192008	0.176454	0.135204	-0.0658358	-0.0459995	0.0592007	0.028294	-0.113055	0.108396	0.0458389	-0.0955101	0.125941			O00541	Pescadillo homolog OS=Homo sapiens GN=PES1 PE=1 SV=1
-0.364163	-0.0636937	0.172715	-0.135848	-0.103167	0.0203397	-0.0508008	-0.0181198	0.105387	-0.0396558	0.131924	0.329007	-0.200569	0.265497	0.441478	-0.340994	0.125072	0.301053	-0.171547	0.195153	0.244674	0.481789	0.386978	0.566238	0.392362	0.297551	0.476811			O00559	Receptor-binding cancer antigen expressed on SiSo cells OS=Homo sapiens GN=EBAG9 PE=1 SV=1
0.059346	-0.277918	0.0134361	0.160065	0.0454591	-0.039257	0.228444	0.113838	0.0291216	-0.245256	-0.170735	0.119585	-0.437828	-0.0811979	-0.120307	-0.339026	0.0176041	-0.021505	-0.0512942	-0.633249	-0.362423	-0.116872	-0.317128	-0.154183	0.232117	0.0318607	0.194806			O00560	Syntenin-1 OS=Homo sapiens GN=SDCBP PE=1 SV=1
-0.217924	-1.03205	0.904161	-0.0865351	-0.757743	1.26812	0.0287359	-0.642472	1.38339	0.156557	-0.392352	-0.385737	0.0354344	0.177968	-0.0749902	0.242612	0.385145	0.132187	0.0288308	0.123355	0.314847	-0.0845156	0.629811	0.0399926	-0.240193	0.474133	-0.115685			O00562	Membrane-associated phosphatidylinositol transfer protein 1 OS=Homo sapiens GN=PITPNM1 PE=1 SV=4
0.292295	0.196766	0.206469	0.18063	0.278213	0.176937	-0.0512133	0.0463697	-0.0549063	0.161392	0.108043	0.204382	0.2106	0.203698	0.362049	0.052661	0.045759	0.20411	0.00861534	-0.0012192	0.0403365	0.161293	0.233874	0.131648	0.145382	0.217963	0.115737	Ribosome biogenesis in eukaryotes	ko03008	O00566	U3 small nucleolar ribonucleoprotein protein MPP10 OS=Homo sapiens GN=MPHOSPH10 PE=1 SV=2
0.185702	0.312945	0.299917	0.0811051	0.16333	0.0763342	-0.185083	-0.102858	-0.189854	0.140277	0.159261	0.237921	0.101486	0.114165	0.219453	-0.077667	-0.064988	0.0403	0.326433	0.293909	0.245599	0.332123	0.29446	0.33042	0.043476	0.005813	0.041773	Ribosome biogenesis in eukaryotes	ko03008	O00567	Nucleolar protein 56 OS=Homo sapiens GN=NOP56 PE=1 SV=4
-0.00559262	-0.0526162	-0.0107562	0.014902	-0.102611	0.00211342	0.0378903	-0.0796227	0.0251018	-0.142526	0.0173191	-0.0728804	-0.0693664	0.0659176	0.0859549	-0.0033373	0.131947	0.151984	-0.121359	-0.146911	-0.158662	-0.116738	-0.000684222	-0.0757441	0.0255727	0.141626	0.0665666	RIG-I-like receptor signaling pathway	ko04622	O00571	ATP-dependent RNA helicase DDX3X OS=Homo sapiens GN=DDX3X PE=1 SV=3
0.00883371	-0.069194	-0.215305	-0.126055	-0.117735	-0.112136	-0.0341666	-0.0258466	-0.0202476	0.0677903	0.286784	-0.107887	0.00957682	-0.0838825	-0.420064	-0.0726523	-0.166112	-0.502293	0.374652	0.378346	0.28291	0.320007	0.425767	0.367441	-0.0252957	0.0804643	0.0221383			O00584	Ribonuclease T2 OS=Homo sapiens GN=RNASET2 PE=1 SV=2
0.0870431	-0.489148	-0.284301	-0.166588	-0.375306	-0.385997	0.062214	-0.146504	-0.157195	-0.317208	-0.384664	-0.478639	0.110096	0.07679	-0.00753158	0.5036	0.470294	0.385972	-0.18586	-0.189656	-0.359248	0.193844	0.107777	-0.122154	0.438765	0.352698	0.122767			O00592	Podocalyxin OS=Homo sapiens GN=PODXL PE=1 SV=2
0.0614172	0.110252	0.173076	0.250118	0.0841049	0.190029	0.135203	-0.0308102	0.0751139	-0.018575	0.149513	0.11717	0.152556	0.280449	0.2101	0.0698533	0.197746	0.127397	0.0539562	0.0955565	0.112403	0.163112	0.104962	0.199072	0.0758068	0.0176568	0.111767			O00625	Pirin OS=Homo sapiens GN=PIR PE=1 SV=1
0.123808	-0.00785303	-0.127299	0.125163	0.204216	-0.0296139	0.128944	0.207997	-0.0258326	0.321096	0.154886	0.36815	0.487295	0.304877	0.504475	0.205918	0.0234997	0.223098	0.421987	0.142995	0.00840559	0.102574	0.137729	-0.0120367	-0.0885552	-0.0534002	-0.203166	Peroxisome	ko04146	O00628	Peroxisomal targeting signal 2 receptor OS=Homo sapiens GN=PEX7 PE=1 SV=1
-0.0279589	-0.0396081	0.0360548	-0.325793	0.0432234	-0.102776	-0.315289	0.0537275	-0.0922719	0.0243074	-0.0620389	0.0540036	-0.0751484	-0.160694	-0.10473	-0.0805724	-0.166118	-0.110154	-0.0140107	-0.0984405	-0.115698	-0.201152	-0.0780006	0.100868	-0.125102	-0.00195087	0.176918			O00629	Importin subunit alpha-3 OS=Homo sapiens GN=KPNA4 PE=1 SV=1
-0.0803884	-0.244909	-0.380772	-0.399982	-0.400912	-0.482846	-0.164626	-0.165556	-0.24749	0.0432148	0.0245964	0.386159	-0.136464	-0.0957211	0.088496	-0.287787	-0.247045	-0.0628274	-0.295297	-0.154782	0.0308556	-0.732353	-0.246655	-0.0861178	-0.592612	-0.106914	0.0536233			O00635	E3 ubiquitin-protein ligase TRIM38 OS=Homo sapiens GN=TRIM38 PE=1 SV=1
-0.405913	-0.496055	-0.458421	-0.762488	-0.665666	-0.755944	-0.309025	-0.212203	-0.302481	-0.140149	-0.344695	-0.213522	-0.281554	-0.255988	-0.421574	-0.0487653	-0.0231993	-0.188785	-0.118668	-0.227715	-0.0935356	0.120596	0.0677381	0.201068	0.267236	0.214378	0.347708			O00712	Nuclear factor 1 B-type OS=Homo sapiens GN=NFIB PE=1 SV=2
-0.132793	-0.341716	-0.170003	0.156068	-0.0852694	0.0883052	0.370905	0.129568	0.303143	0.0151661	-0.00390974	-0.300008	0.134613	-0.0337055	0.032895	0.230864	0.062545	0.129146	0.56032	0.386956	0.0779781	0.221542	0.0291978	0.128672	-0.120209	-0.312554	-0.213079	Bladder cancer;Cell cycle;Chronic myeloid leukemia;Glioma;Melanoma;Non-small cell lung cancer;Pancreatic cancer;Pathways in cancer;Prostate cancer;Small cell lung cancer	ko04110;ko05200;ko05212;ko05214;ko05215;ko05218;ko05219;ko05220;ko05222;ko05223	O00716	Transcription factor E2F3 OS=Homo sapiens GN=E2F3 PE=1 SV=1
0.26214	-0.197568	0.0291944	-0.0162258	-0.354236	-0.0903596	-0.0474813	-0.385491	-0.121615	-0.10696	-0.261032	0.125615	0.299027	-0.0637177	-0.120372	0.379819	0.0170746	-0.0395797	-0.289332	-0.310476	-0.317651	-0.23401	-0.258825	-0.366657	0.0718097	0.0469947	-0.0608373			O00743	Serine/threonine-protein phosphatase 6 catalytic subunit OS=Homo sapiens GN=PPP6C PE=1 SV=1
0.113442	0.132317	0.244651	-0.0370638	0.0734203	-0.0431654	-0.200534	-0.0900497	-0.206635	0.00905718	0.125844	0.151815	-0.360239	-0.114266	-0.086996	-0.455811	-0.209838	-0.182568	0.0356154	0.255558	0.0290387	-0.103753	0.0203389	-0.156936	-0.21049	-0.0863985	-0.263673	Inositol phosphate metabolism;Phosphatidylinositol signaling system	ko00562;ko04070	O00750	Phosphatidylinositol 4-phosphate 3-kinase C2 domain-containing subunit beta OS=Homo sapiens GN=PIK3C2B PE=1 SV=2
0.0261497	-0.218464	0.0843639	-0.0165081	-0.201063	-0.0655525	0.0194754	-0.16508	-0.029569	0.0759559	-0.0261222	0.123707	0.144268	-0.133476	0.0673376	0.0864211	-0.191323	0.0094907	0.00039658	0.0697558	0.0119438	0.143735	0.159045	0.0779663	0.11637	0.13168	0.0506009	Lysosome;Other glycan degradation	ko00511;ko04142	O00754	Lysosomal alpha-mannosidase OS=Homo sapiens GN=MAN2B1 PE=1 SV=3
-0.136376	-0.0663895	-0.00833851	-0.0180353	0.0146082	0.0860011	0.0523327	0.0849762	0.156369	0.0968811	0.0300552	0.176828	-0.638653	-0.771392	-0.630686	-0.739908	-0.872647	-0.731941	0.196179	0.23601	0.125294	-0.0406833	0.0113116	-0.186645	-0.226511	-0.174516	-0.372473	Ubiquitin mediated proteolysis	ko04120	O00762	Ubiquitin-conjugating enzyme E2 C OS=Homo sapiens GN=UBE2C PE=1 SV=1
0.121669	0.201059	0.0783708	0.0920617	-0.0539721	-0.0878083	-0.0416379	-0.187672	-0.221508	-0.0216582	0.0354891	-0.0535416	0.107578	0.0917488	-0.0358493	0.120815	0.104986	-0.0226124	0.184262	0.00775273	0.068106	0.14556	-0.136453	0.0452169	0.0588531	-0.22316	-0.04149	Vitamin B6 metabolism	ko00750	O00764	Pyridoxal kinase OS=Homo sapiens GN=PDXK PE=1 SV=1
-1.18033	-0.937878	-0.723343	-1.28257	-1.48522	-1.2993	-0.335386	-0.538036	-0.352116	-0.691716	-0.320428	-0.591762	-0.620616	-0.684407	-1.03959	-0.0859807	-0.149772	-0.504955	-0.0449942	0.00202491	-0.267133	-0.0689044	-0.0627087	-0.273977	0.034463	0.0406587	-0.17061	Biosynthesis of unsaturated fatty acids;PPAR signaling pathway	ko01040;ko03320	O00767	Acyl-CoA desaturase OS=Homo sapiens GN=SCD PE=1 SV=2
-0.391276	-0.606894	-0.361858	-0.326199	-0.442343	-0.25982	0.127144	0.0109997	0.193523	-0.465668	-0.521748	-0.66941	-0.486547	-0.432069	-0.503467	0.0657283	0.120206	0.0488083	-0.30496	-0.336208	-0.464441	-0.156244	-0.100404	-0.225629	0.212292	0.268132	0.142907	Ether lipid metabolism;Fat digestion and absorption;Fc gamma R-mediated phagocytosis;Glycerolipid metabolism;Glycerophospholipid metabolism;Sphingolipid metabolism	ko00561;ko00564;ko00565;ko00600;ko04666;ko04975	O14494	Phospholipid phosphatase 1 OS=Homo sapiens GN=PLPP1 PE=1 SV=1
-7.20199e-05	0.0573171	-0.0349496	-0.122524	-0.11142	-0.125372	-0.129956	-0.118852	-0.132804	-0.143688	-0.0473097	-0.123818	-0.225712	-0.109485	-0.29404	-0.120773	-0.00454643	-0.189101	-0.0111738	3.22311e-05	-0.127815	-0.31525	-0.312177	-0.362826	-0.268931	-0.265858	-0.316507			O14497	AT-rich interactive domain-containing protein 1A OS=Homo sapiens GN=ARID1A PE=1 SV=3
-0.178992	0.233102	-0.0547486	-0.097428	0.240492	-0.202633	-0.0972151	0.240705	-0.20242	0.000249809	-0.305818	0.137434	0.326529	-0.165103	0.672513	0.382574	-0.109058	0.728558	0.444768	0.234114	0.399291	0.310306	0.208762	0.542611	-0.049085	-0.150629	0.18322			O14519	Cyclin-dependent kinase 2-associated protein 1 OS=Homo sapiens GN=CDK2AP1 PE=1 SV=1
0.200231	0.0870096	0.356825	0.156449	-0.23669	0.174003	-0.0582395	-0.451379	-0.0406855	0.16987	0.225383	0.341049	0.133049	0.244546	0.230508	-0.112385	-0.000888	-0.014926	0.418041	0.436215	0.267028	0.296736	0.565788	0.446589	-0.0770253	0.192027	0.0728277			O14523	Phospholipid transfer protein C2CD2L OS=Homo sapiens GN=C2CD2L PE=1 SV=3
-0.590753	-0.200771	-0.105331	-0.680777	-0.386303	-0.0687156	-0.381825	-0.0873513	0.230236	-0.151112	-0.0845746	-0.282536	-0.244566	-0.218932	-0.506503	-0.0718251	-0.0461911	-0.333762	-0.143293	-0.0348617	0.0203047	-0.199276	0.063945	-0.154247	-0.146659	0.116562	-0.10163			O14530	Thioredoxin domain-containing protein 9 OS=Homo sapiens GN=TXNDC9 PE=1 SV=2
0.0187265	0.214086	-0.1707	-0.199179	0.0815053	-0.378527	-0.219883	0.0608011	-0.399231	0.138044	0.0535399	0.0213273	-0.00549539	-0.4421	-0.222122	-0.0764658	-0.51307	-0.293092	0.252956	0.373918	0.240626	0.00188961	0.0951069	0.134693	-0.287277	-0.19406	-0.154474			O14531	Dihydropyrimidinase-related protein 4 OS=Homo sapiens GN=DPYSL4 PE=1 SV=2
0.0311886	0.0652441	0.16041	0.278474	0.269525	0.315901	0.19286	0.183911	0.230287	0.318902	0.316377	0.282858	0.363995	0.445079	0.191831	0.0579493	0.139033	-0.114215	0.286204	0.138219	0.29254	0.353494	0.175058	0.303314	0.114506	-0.0639297	0.0643263			O14545	TRAF-type zinc finger domain-containing protein 1 OS=Homo sapiens GN=TRAFD1 PE=1 SV=1
-0.0804236	0.27331	0.131393	0.149841	0.249604	0.119398	0.0417479	0.141511	0.0113049	0.182772	0.507538	0.338533	0.0371045	0.316235	0.225781	-0.305843	-0.0267127	-0.117167	0.338448	0.451631	0.266063	0.666527	0.795012	0.631971	0.31448	0.442965	0.279924	Alzheimer's disease;Cardiac muscle contraction;Huntington's disease;Oxidative phosphorylation;Parkinson's disease	ko00190;ko04260;ko05010;ko05012;ko05016	O14548	Cytochrome c oxidase subunit 7A-related protein, mitochondrial OS=Homo sapiens GN=COX7A2L PE=1 SV=2
0.153452	0.203454	0.0356588	0.267542	0.345922	0.175343	0.136687	0.215067	0.0444881	-0.238714	0.0115297	-0.0772154	-0.38773	-0.098342	-0.264796	-0.286263	0.00312457	-0.163329	-0.463955	-0.372085	0.0129903	-0.101502	0.203768	0.346079	0.172848	0.478118	0.620429	Alzheimer's disease;Huntington's disease;Oxidative phosphorylation;Parkinson's disease	ko00190;ko05010;ko05012;ko05016	O14561	Acyl carrier protein, mitochondrial OS=Homo sapiens GN=NDUFAB1 PE=1 SV=3
0.242245	-0.0127666	0.202203	0.101607	-0.00604306	0.159342	-0.0422868	-0.149937	0.0154482	0.235659	-0.129328	0.14793	0.181411	-0.119584	0.113705	0.0966573	-0.204338	0.0289513	-0.00111572	-0.0325875	0.0926677	-0.297167	-0.146406	-0.252352	-0.316822	-0.166061	-0.272007			O14562	Ubiquitin domain-containing protein UBFD1 OS=Homo sapiens GN=UBFD1 PE=1 SV=2
-0.191349	-0.191575	-0.366197	-2.04774	-1.76838	-2.30278	-1.79803	-1.51867	-2.05307	-0.206661	-0.023634	0.0673741	-0.825268	-0.569063	-0.660578	-0.770961	-0.514756	-0.606271	-0.433741	-0.23649	-0.237851	-0.91499	-0.61065	-0.795412	-0.612296	-0.307956	-0.492718			O14578	Citron Rho-interacting kinase OS=Homo sapiens GN=CIT PE=1 SV=2
0.283177	0.173196	0.135695	0.178578	0.0500156	0.00719871	-0.018778	-0.14734	-0.190157	-0.0434511	0.0976065	0.103406	0.0117575	0.153824	-0.0236155	-0.040763	0.101304	-0.076136	-0.0771464	0.000257163	0.0528048	-0.141814	0.0012328	-0.0245393	-0.133786	0.00926095	-0.0165112			O14579	Coatomer subunit epsilon OS=Homo sapiens GN=COPE PE=1 SV=3
-0.111427	-0.217689	0.00900142	0.139245	0.222815	0.502713	0.24595	0.32952	0.609418	-0.269549	-0.304907	-0.0910904	-0.216982	-0.309298	0.00750902	0.0048668	-0.0874492	0.229358	0.0238692	-0.628092	-0.164651	0.143098	-0.832071	-0.334241	0.399389	-0.57578	-0.0779497	Antigen processing and presentation;ko05152;Primary immunodeficiency	ko04612;ko05152;ko05340	O14593	DNA-binding protein RFXANK OS=Homo sapiens GN=RFXANK PE=1 SV=2
0.196117	-0.0186092	-0.00252305	0.197737	-0.000635139	-0.321895	0.139409	-0.0589634	-0.380223	0.214902	-0.0472402	-0.106625	0.283235	0.101194	0.0905048	0.262889	0.0808484	0.0701592	0.0519106	0.0550106	0.139079	0.0617634	-0.188501	-0.0939971	-0.0202367	-0.270501	-0.175997	RNA transport	ko03013	O14602	Eukaryotic translation initiation factor 1A, Y-chromosomal OS=Homo sapiens GN=EIF1AY PE=1 SV=4
0.0261398	-0.0315403	0.0764141	-0.0633052	-0.111554	-0.030155	-0.0869764	-0.135225	-0.0538262	0.107884	-0.0959406	-0.0671124	0.072346	-0.179289	-0.0477257	0.0907357	-0.160899	-0.029336	0.0501563	-0.0262309	0.00717596	-0.0406196	0.0120551	0.0115888	-0.0509867	0.00168798	0.00122168	Lysosome	ko04142	O14617	AP-3 complex subunit delta-1 OS=Homo sapiens GN=AP3D1 PE=1 SV=1
0.0642428	0.0874254	0.206842	0.0146197	-0.148447	-0.0580036	-0.104884	-0.26795	-0.177507	0.566016	0.322121	0.225132	0.532866	-0.016074	0.361989	0.161776	-0.387164	-0.00910067	0.0633561	0.412912	0.133188	-0.00773865	0.180508	-0.141375	-0.210891	-0.022644	-0.344527	Amyotrophic lateral sclerosis (ALS)	ko05014	O14618	Copper chaperone for superoxide dismutase OS=Homo sapiens GN=CCS PE=1 SV=1
0.197416	-0.00364753	0.102557	0.0200929	0.0830615	0.121164	-0.0786823	-0.0157137	0.0223888	-0.215832	0.00984452	-0.00103638	-0.0510585	-0.147754	0.170117	0.0179495	-0.078746	0.239125	-0.0165864	0.0605903	0.0615508	0.04922	0.0766751	0.242654	0.0140351	0.0414902	0.207469	Axon guidance	ko04360	O14639	Actin-binding LIM protein 1 OS=Homo sapiens GN=ABLIM1 PE=1 SV=3
-0.316137	-0.489261	-0.294874	-0.209049	-0.147866	-0.0621553	0.157708	0.218891	0.304602	0.00395453	-0.0154644	0.0228245	0.145501	0.122905	0.109799	0.141729	0.119133	0.106027	-0.144361	-0.175412	-0.143792	-0.0364004	0.0490865	0.158291	0.118121	0.203608	0.312813	Basal cell carcinoma;Melanogenesis;Notch signaling pathway;Pathways in cancer;Wnt signaling pathway	ko04310;ko04330;ko04916;ko05200;ko05217	O14640	Segment polarity protein dishevelled homolog DVL-1 OS=Homo sapiens GN=DVL1 PE=1 SV=2
0.112615	-0.129273	0.014	0.335937	0.22599	0.0823031	0.336823	0.226876	0.0831891	-0.0882683	-0.0267134	-0.0357293	0.282595	0.303945	0.169954	0.332832	0.354182	0.220191	-0.00450977	-0.0719875	-0.126349	0.286099	0.362793	0.19049	0.353714	0.430408	0.258105	Basal cell carcinoma;Melanogenesis;Notch signaling pathway;Pathways in cancer;Wnt signaling pathway	ko04310;ko04330;ko04916;ko05200;ko05217	O14641	Segment polarity protein dishevelled homolog DVL-2 OS=Homo sapiens GN=DVL2 PE=1 SV=1
-0.287796	0.0164429	-0.359374	0.124016	0.285016	-0.052326	0.334258	0.495258	0.157916	0.0297404	-0.178215	-0.127612	-0.171473	-0.275265	-0.327002	-0.0794441	-0.183236	-0.234973	0.309133	0.24271	0.185789	-0.0345122	-0.174326	-0.148552	-0.28039	-0.420203	-0.394429			O14646	Chromodomain-helicase-DNA-binding protein 1 OS=Homo sapiens GN=CHD1 PE=1 SV=2
-0.433203	-0.531003	-0.548473	-0.539235	-0.562479	-0.857485	-0.0350087	-0.0582527	-0.353259	0.000925653	0.167291	-0.0310652	-0.244632	-0.0773449	-0.0877063	-0.290349	-0.123062	-0.133423	0.00493689	0.0851097	0.11602	0.151086	0.0698678	0.231609	0.0823971	0.00117894	0.16292			O14647	Chromodomain-helicase-DNA-binding protein 2 OS=Homo sapiens GN=CHD2 PE=1 SV=2
-0.0245525	0.147406	0.0946406	0.345941	0.277104	-0.0055467	0.273443	0.204606	-0.0780447	0.407835	-0.181485	0.133144	0.315164	-0.106929	-0.148561	0.195333	-0.22676	-0.268392	0.144441	0.252871	0.275911	0.289781	0.327708	0.385844	0.0653733	0.1033	0.161436	SNARE interactions in vesicular transport	ko04130	O14653	Golgi SNAP receptor complex member 2 OS=Homo sapiens GN=GOSR2 PE=1 SV=2
-0.221473	-0.163619	-0.353926	-0.0723209	-0.330861	-0.370993	0.174018	-0.0845217	-0.124654	-0.115255	-0.281833	0.0513467	0.000560132	-0.0171227	-0.119923	0.115807	0.0981244	-0.0046759	-0.0848103	-0.0840313	0.0126745	0.0988954	0.17423	0.168839	0.150951	0.226286	0.220895			O14656	Torsin-1A OS=Homo sapiens GN=TOR1A PE=1 SV=1
-0.202589	0.167058	-0.0575217	-0.190761	-0.231188	-0.283828	-0.159743	-0.20017	-0.25281	0.131094	0.0425847	-0.225553	-0.361094	-0.58886	-0.426691	-0.343803	-0.571569	-0.4094	-0.403594	-0.461919	-0.358532	-0.89382	-0.928122	-0.848395	-0.485805	-0.520107	-0.44038			O14657	Torsin-1B OS=Homo sapiens GN=TOR1B PE=1 SV=2
-0.0322484	-0.14833	-0.25239	-0.119291	-0.317338	-0.275485	0.0250318	-0.173015	-0.131162	-0.131076	-0.0941263	-0.141123	-0.190347	-0.302922	-0.385464	-0.0682386	-0.180814	-0.263356	-0.370783	-0.345184	-0.14309	-0.907986	-0.784038	-0.640584	-0.621634	-0.497686	-0.354232	SNARE interactions in vesicular transport	ko04130	O14662	Syntaxin-16 OS=Homo sapiens GN=STX16 PE=1 SV=3
0.064055	0.0603839	0.164794	-0.351478	-0.513127	-0.443709	-0.447889	-0.609538	-0.54012	0.0927226	0.0923943	0.0944484	-0.445391	-0.486243	-0.413711	-0.538579	-0.579431	-0.506899	0.155599	0.173495	0.169187	-0.457869	-0.249699	-0.458343	-0.623963	-0.415793	-0.624437	Alzheimer's disease;Epithelial cell signaling in Helicobacter pylori infection	ko05010;ko05120	O14672	Disintegrin and metalloproteinase domain-containing protein 10 OS=Homo sapiens GN=ADAM10 PE=1 SV=1
-0.319441	-0.512648	-0.124787	0.23901	0.744549	0.751076	0.557969	1.06351	1.07003	0.270457	0.195341	0.381765	0.20401	0.241284	0.122427	-0.078511	-0.041237	-0.160094	0.185642	0.047258	0.0452892	0.371815	0.39914	0.2773	0.279085	0.30641	0.18457	p53 signaling pathway	ko04115	O14681	Etoposide-induced protein 2.4 homolog OS=Homo sapiens GN=EI24 PE=1 SV=4
0.765005	0.57445	0.5872	-0.209692	-0.0483449	-0.252225	-0.85191	-0.690563	-0.894443	0.142057	-0.35152	0.164148	-0.197768	-0.555122	0.0907216	-0.182663	-0.540017	0.105827	0.113673	0.00671245	-0.0555602	-0.115548	-0.120746	-0.383271	-0.137156	-0.142354	-0.404879			O14683	Tumor protein p53-inducible protein 11 OS=Homo sapiens GN=TP53I11 PE=1 SV=2
0.0623545	-0.193517	0.0564155	-0.0358145	-0.0533286	0.436463	-0.0108988	-0.0284129	0.461379	-0.143418	-0.167823	-0.13141	-0.0822443	-0.0436362	-0.0197341	0.065306	0.103914	0.127816	-0.0408214	0.123716	0.00436145	-0.0331243	0.125846	0.0634131	-0.0622097	0.0967607	0.0343277			O14686	Histone-lysine N-methyltransferase 2D OS=Homo sapiens GN=KMT2D PE=1 SV=2
0.351796	0.117648	0.279106	0.226877	-0.0212324	0.224031	-0.0226397	-0.270749	-0.0254857	0.441531	0.315637	0.476168	0.63557	0.205286	0.45686	0.224458	-0.205826	0.045748	0.162731	0.0316723	0.0211897	0.0194685	0.0522946	-0.19305	-0.0523958	-0.0195697	-0.264914			O14730	Serine/threonine-protein kinase RIO3 OS=Homo sapiens GN=RIOK3 PE=1 SV=2
-0.198724	-0.212096	0.0174787	-0.573002	-0.0558183	-0.0157133	-0.441888	0.0752955	0.1154	-1.09717	-0.891964	-0.865556	-1.19843	-1.1384	-0.840449	-0.246867	-0.186837	0.111114	-0.0389593	0.0177603	0.135808	-0.322978	-0.196772	-0.351086	-0.361181	-0.234975	-0.389289	Inositol phosphate metabolism;Phosphatidylinositol signaling system;Streptomycin biosynthesis	ko00521;ko00562;ko04070	O14732	Inositol monophosphatase 2 OS=Homo sapiens GN=IMPA2 PE=1 SV=1
-0.0367852	0.172842	-0.140202	-0.319688	-0.289118	-0.420046	-0.318306	-0.287736	-0.418664	0.143476	0.0334577	0.115981	-0.433355	-0.270046	-0.304783	-0.530993	-0.367684	-0.402421	-0.0398222	0.0616831	0.0984843	-0.372451	-0.359892	-0.155764	-0.412566	-0.400007	-0.195879	ErbB signaling pathway;Fc epsilon RI signaling pathway;GnRH signaling pathway;MAPK signaling pathway;Neurotrophin signaling pathway;Osteoclast differentiation;Protein processing in endoplasmic reticulum;T cell receptor signaling pathway;Toll-like receptor signaling pathway	ko04010;ko04012;ko04141;ko04380;ko04620;ko04660;ko04664;ko04722;ko04912	O14733	Dual specificity mitogen-activated protein kinase kinase 7 OS=Homo sapiens GN=MAP2K7 PE=1 SV=2
-0.196713	-0.168866	-0.0554251	-0.433483	-0.276878	-0.228331	-0.293148	-0.136543	-0.0879963	-0.0288733	0.0109816	-0.0331705	-0.0449115	-0.0499239	0.0110182	-0.0278908	-0.0329032	0.0280389	0.408385	0.37585	0.172297	0.0476877	0.116493	-0.0577108	-0.271156	-0.202351	-0.376555	Peroxisome	ko04146	O14734	Acyl-coenzyme A thioesterase 8 OS=Homo sapiens GN=ACOT8 PE=1 SV=1
0.0124986	-0.112433	-0.0253437	0.0962573	-0.0706323	-0.0582347	0.138017	-0.0288729	-0.0164753	-0.152701	0.0377026	-0.0302991	-0.185219	-0.11513	-0.213098	-0.136787	-0.0666975	-0.164666	-0.133673	-0.14814	-0.103078	-0.417701	-0.35951	-0.354203	-0.289404	-0.231213	-0.225906			O14737	Programmed cell death protein 5 OS=Homo sapiens GN=PDCD5 PE=1 SV=3
-0.0330985	-0.0313659	0.00174069	-0.00121841	-0.000539352	-0.0338798	0.0196895	0.0203686	-0.0129719	-0.13186	-0.137928	-0.070038	0.0532791	0.0193566	0.0861072	0.166554	0.132632	0.199383	-0.0175937	0.0220553	-0.037526	0.0522949	0.0851115	0.161306	0.0633164	0.096133	0.172327	Cell cycle - yeast;RNA transport	ko03013;ko04111	O14744	Protein arginine N-methyltransferase 5 OS=Homo sapiens GN=PRMT5 PE=1 SV=4
0.120654	0.0640595	0.0835406	0.0247035	0.00904689	-0.0761066	-0.0647145	-0.0803711	-0.165525	0.112665	0.257737	0.0771674	0.0667549	0.230316	0.0643675	-0.0824349	0.0811262	-0.0848223	0.126518	0.241852	0.209292	0.0116173	0.0789853	0.0680375	-0.180937	-0.113569	-0.124517			O14745	Na(+)/H(+) exchange regulatory cofactor NHE-RF1 OS=Homo sapiens GN=SLC9A3R1 PE=1 SV=4
0.118781	0.153431	0.0284492	-0.807306	-0.6124	-0.640008	-0.907526	-0.71262	-0.740228	0.174067	0.141164	0.0432486	-1.2642	-0.987049	-1.15724	-1.38369	-1.10654	-1.27673	0.106204	0.0635747	-0.0188421	-0.687767	-0.962796	-0.986505	-0.738079	-1.01311	-1.03682	Cell cycle;Cell cycle - yeast;Meiosis - yeast;p53 signaling pathway	ko04110;ko04111;ko04113;ko04115	O14757	Serine/threonine-protein kinase Chk1 OS=Homo sapiens GN=CHEK1 PE=1 SV=2
0.0661006	-0.199349	0.0412704	0.365526	0.320567	0.564236	0.396185	0.351226	0.594895	-0.844772	-0.979173	-0.987849	-0.527445	-0.642241	-0.975281	0.40982	0.295024	-0.0380163	0.0529312	-0.0522752	-0.0761633	0.540464	0.129423	0.0980106	0.565633	0.154592	0.12318	Apoptosis;Cytokine-cytokine receptor interaction;Measles;Natural killer cell mediated cytotoxicity	ko04060;ko04210;ko04650;ko05162	O14763	Tumor necrosis factor receptor superfamily member 10B OS=Homo sapiens GN=TNFRSF10B PE=1 SV=2
0.119263	-0.148894	-0.157637	-0.0142527	-0.0369309	-0.0217273	0.04817	0.0254918	0.0406954	0.173162	-0.00904378	0.0671634	0.494469	0.376249	0.450637	0.417375	0.299155	0.373543	0.494758	0.286148	0.428288	0.771033	0.626813	0.773817	0.367968	0.223748	0.370752	Amino sugar and nucleotide sugar metabolism;Fructose and mannose metabolism	ko00051;ko00520	O14772	Fucose-1-phosphate guanylyltransferase OS=Homo sapiens OX=9606 GN=FPGT PE=1 SV=3
0.119263	-0.148894	-0.157637	-0.0142527	-0.0369309	-0.0217273	0.04817	0.0254918	0.0406954	0.173162	-0.00904378	0.0671634	0.494469	0.376249	0.450637	0.417375	0.299155	0.373543	0.494758	0.286148	0.428288	0.771033	0.626813	0.773817	0.367968	0.223748	0.370752	Amino sugar and nucleotide sugar metabolism;Fructose and mannose metabolism	ko00051;ko00520	O14772	Fucose-1-phosphate guanylyltransferase OS=Homo sapiens GN=FPGT PE=1 SV=2
-0.0129679	-0.214853	0.0893741	-0.0432875	-0.378845	-0.136441	0.00286143	-0.332696	-0.0902921	0.0801829	0.00792946	0.0791488	0.222993	-0.168874	0.193784	0.167239	-0.224628	0.13803	0.328344	0.350562	0.334153	0.305298	0.510856	0.329377	-0.0323883	0.17317	-0.00830933	Lysosome	ko04142	O14773	Tripeptidyl-peptidase 1 OS=Homo sapiens GN=TPP1 PE=1 SV=2
-0.0601546	-0.103766	-0.0727629	0.0621371	0.143743	0.0394081	0.141032	0.222637	0.118303	-0.139884	-0.201883	-0.164598	0.00529061	0.0097532	0.00583807	0.174079	0.178542	0.174626	-0.153999	-0.0178273	-0.0771646	0.0844148	0.0422863	0.105032	0.167412	0.125283	0.188029	Spliceosome	ko03040	O14776	Transcription elongation regulator 1 OS=Homo sapiens GN=TCERG1 PE=1 SV=2
-0.370305	-0.311613	-0.512129	-0.463299	-0.43587	-0.509894	-0.0652833	-0.0378543	-0.111878	-0.0891165	-0.134968	-0.0883277	-0.78282	-0.764845	-0.794968	-0.678683	-0.660708	-0.690831	0.0690868	0.0338283	-0.0684774	-0.735847	-0.805467	-0.955849	-0.747326	-0.816946	-0.967328			O14777	Kinetochore protein NDC80 homolog OS=Homo sapiens GN=NDC80 PE=1 SV=1
0.041875	0.210466	0.138214	0.4558	0.516655	0.495719	0.325615	0.38647	0.365534	0.498684	0.410347	0.210951	0.475938	0.365696	0.319108	0.102611	-0.00763133	-0.0542193	0.186174	0.166192	0.17324	0.115853	0.115729	0.0375182	-0.059349	-0.059473	-0.137684	Axon guidance	ko04360	O14786	Neuropilin-1 OS=Homo sapiens GN=NRP1 PE=1 SV=3
-0.175628	0.0138796	-0.0623247	-0.305014	-0.310685	-0.292709	-0.230323	-0.235994	-0.218018	-0.208432	-0.305924	-0.296013	-0.231455	-0.277553	-0.380646	0.038668	-0.00743	-0.110523	-0.00484342	0.0181884	-0.0353218	-0.193004	-0.178441	-0.252989	-0.185678	-0.171115	-0.245663			O14787	Transportin-2 OS=Homo sapiens GN=TNPO2 PE=1 SV=3
0.0953656	-0.0297278	-0.110007	0.105092	-0.0137405	0.00530474	0.119882	0.00104923	0.0200945	0.147045	0.266291	0.174537	0.17459	0.27234	0.281088	-0.0213677	0.0763823	0.0851303	0.337517	0.402784	0.302183	0.416016	0.233741	0.411801	0.0685213	-0.113754	0.0643063			O14795	Protein unc-13 homolog B OS=Homo sapiens GN=UNC13B PE=1 SV=2
-0.00823286	-0.115793	0.180849	-0.176468	-0.164329	0.0199124	-0.195409	-0.18327	0.000971353	0.0858743	0.0139248	-0.0945615	-0.122197	-0.126861	-0.192344	-0.123943	-0.128607	-0.19409	0.0248809	-0.0525565	-0.0340137	-0.211556	-0.210038	-0.228573	-0.190993	-0.189475	-0.20801	Cytosolic DNA-sensing pathway;Purine metabolism;Pyrimidine metabolism;RNA polymerase	ko00230;ko00240;ko03020;ko04623	O14802	DNA-directed RNA polymerase III subunit RPC1 OS=Homo sapiens GN=POLR3A PE=1 SV=2
0.127917	-0.0945709	0.0583032	-0.0130704	-0.159083	-0.00526054	-0.0436202	-0.189633	-0.0358103	0.0491074	0.129169	0.0272041	0.223182	0.123196	0.183559	0.154689	0.0547025	0.115066	0.044272	-0.0580413	-0.044678	0.199917	0.0352713	-0.0659568	0.219399	0.0547537	-0.0464744	Proteasome	ko03050	O14818	Proteasome subunit alpha type-7 OS=Homo sapiens GN=PSMA7 PE=1 SV=1
-0.0604647	-0.191093	-0.11915	-0.0738374	-0.181254	0.0309383	0.0497318	-0.0576848	0.154508	-0.136103	0.12016	0.191912	0.094632	0.183623	0.232979	0.0359757	0.124967	0.174323	0.246369	0.196062	0.16174	0.430859	0.421637	0.39469	0.229469	0.220247	0.1933			O14828	Secretory carrier-associated membrane protein 3 OS=Homo sapiens GN=SCAMP3 PE=1 SV=3
-0.288503	-0.257727	-0.29527	-0.289387	-0.112774	-0.548916	-0.008887	0.167726	-0.268416	-0.562504	-0.237376	-0.165473	-0.256476	-0.148986	0.133188	0.0653083	0.172798	0.454972	-0.279437	-0.268943	-0.256508	0.0547733	0.0345518	0.130466	0.323069	0.302848	0.398762	Peroxisome	ko04146	O14832	Phytanoyl-CoA dioxygenase, peroxisomal OS=Homo sapiens GN=PHYH PE=1 SV=1
0.255729	0.1411	0.142616	0.336959	0.376047	0.320155	0.157144	0.196232	0.14034	0.228732	0.26048	0.1611	0.459266	0.576971	0.237466	0.242495	0.3602	0.0206953	0.383002	0.35719	0.329906	0.482731	0.522545	0.547326	0.126032	0.165846	0.190627	Glutathione metabolism	ko00480	O14841	5-oxoprolinase OS=Homo sapiens GN=OPLAH PE=1 SV=3
-0.209543	0.100957	-0.0778547	0.021089	0.0564438	0.124516	0.0832359	0.118591	0.186663	0.207825	-0.186	-0.322371	0.551679	0.407914	0.36908	0.651861	0.508096	0.469262	-0.304185	-0.17786	-0.375142	0.144076	0.109122	0.126386	0.429805	0.394851	0.412115			O14863	Zinc transporter 4 OS=Homo sapiens GN=SLC30A4 PE=2 SV=2
0.0384292	-0.349573	-0.20569	0.355916	-0.403237	-0.378809	0.528194	-0.230959	-0.206531	-0.237934	-0.0776055	-0.125381	-0.290822	-0.417116	-0.634713	-0.143849	-0.270143	-0.487739	-0.0604345	-0.0516249	-0.0287855	-0.506553	-0.647415	-0.647212	-0.459605	-0.600467	-0.600264			O14867	Transcription regulator protein BACH1 OS=Homo sapiens GN=BACH1 PE=1 SV=2
0.172653	0.291605	0.253622	0.0593783	0.132554	-0.000636351	-0.179915	-0.106739	-0.23993	0.087223	0.275553	0.0813401	-0.394488	-0.0374404	-0.342825	-0.542527	-0.185479	-0.490864	0.271615	0.0369563	0.161023	0.178043	-0.0879671	0.104428	0.0215116	-0.244499	-0.0521034			O14874	[3-methyl-2-oxobutanoate dehydrogenase [lipoamide]] kinase, mitochondrial OS=Homo sapiens GN=BCKDK PE=1 SV=2
0.106679	0.0241996	-0.0174855	0.32323	0.257873	0.0807529	0.285432	0.220075	0.0429552	-0.0768276	-0.175904	0.0649897	-0.0464648	-0.146298	-0.045755	0.0161158	-0.0837174	0.0168256	-0.473077	-0.11517	-0.266603	-0.188788	0.177083	-0.0111219	0.096162	0.462033	0.273828	Drug metabolism - cytochrome P450;Glutathione metabolism;Metabolism of xenobiotics by cytochrome P450	ko00480;ko00980;ko00982	O14880	Microsomal glutathione S-transferase 3 OS=Homo sapiens GN=MGST3 PE=1 SV=1
0.327705	0.0762627	-0.0565366	0.102106	0.0173559	0.0898305	-0.0137044	-0.0984545	-0.0259799	0.360292	0.145681	0.201364	0.288695	0.118154	0.209316	0.052916	-0.117625	-0.026463	-0.0751086	-0.293062	0.163456	0.248304	-0.193355	0.0102899	0.316542	-0.125117	0.0785281	RNA transport	ko03013	O14893	Gem-associated protein 2 OS=Homo sapiens GN=GEMIN2 PE=1 SV=1
0.201238	0.262859	0.276297	-0.312873	-0.221399	-0.442352	-0.559671	-0.468197	-0.68915	-0.0516623	-0.0141657	0.156429	-0.88508	-0.749058	-0.703583	-0.91528	-0.779258	-0.733783	0.211737	-0.0104621	0.202747	-0.727722	-0.788535	-0.458334	-0.862396	-0.923209	-0.593008			O14896	Interferon regulatory factor 6 OS=Homo sapiens GN=IRF6 PE=1 SV=1
0.141616	0.214569	0.465296	0.491486	0.441185	0.485492	0.217659	0.167358	0.211665	0.710814	0.265376	0.498956	0.707152	0.269881	0.718482	0.215437	-0.221834	0.226767	0.498079	0.141368	0.636261	1.23716	0.649311	1.07671	0.811924	0.224075	0.651474			O14907	Tax1-binding protein 3 OS=Homo sapiens GN=TAX1BP3 PE=1 SV=2
0.104448	-0.007655	0.022846	-0.0941484	-0.133092	-0.149655	-0.134028	-0.172972	-0.189535	-0.103588	-0.230592	-0.174187	0.0553157	0.0107108	-0.112236	0.224771	0.180166	0.0572197	0.00536299	0.00889642	0.0579372	0.00303343	-0.0410225	0.00152681	-0.0210321	-0.065088	-0.0225387			O14908	PDZ domain-containing protein GIPC1 OS=Homo sapiens GN=GIPC1 PE=1 SV=2
-0.245093	-0.340591	0.0588356	0.160948	0.100872	0.0946408	0.336564	0.276488	0.270257	-0.170432	-0.333631	0.112612	-0.359048	-0.414459	0.0356754	-0.228564	-0.283975	0.166159	-0.0161078	-0.166026	0.192208	0.185242	0.0955865	-0.103623	0.181884	0.0922284	-0.106981			O14910	Protein lin-7 homolog A OS=Homo sapiens GN=LIN7A PE=1 SV=2
0.0441623	-0.168031	0.0356776	-0.0964536	-0.270957	-0.163672	-0.0670566	-0.24156	-0.134275	-0.157902	-0.0148362	0.127055	-0.249576	-0.210526	-0.0650858	-0.234348	-0.195298	-0.0498581	0.093496	-0.0339786	0.135643	-0.153031	-0.374631	-0.205351	-0.218084	-0.439684	-0.270404	Acute myeloid leukemia;Adipocytokine signaling pathway;Apoptosis;B cell receptor signaling pathway;Chagas disease (American trypanosomiasis);Chemokine signaling pathway;Chronic myeloid leukemia;Cytosolic DNA-sensing pathway;Epithelial cell signaling in Helicobacter pylori infection;Hepatitis C;Insulin signaling pathway;MAPK signaling pathway;Neurotrophin signaling pathway;NOD-like receptor signal…	ko04010;ko04062;ko04210;ko04380;ko04620;ko04621;ko04622;ko04623;ko04660;ko04662;ko04722;ko04910;ko04920;ko04930;ko05120;ko05131;ko05142;ko05145;ko05160;ko05200;ko05212;ko05215;ko05220;ko05221;ko05222	O14920	Inhibitor of nuclear factor kappa-B kinase subunit beta OS=Homo sapiens GN=IKBKB PE=1 SV=1
-0.448701	-0.313165	-0.430842	-0.279251	-0.256237	-0.2993	0.118318	0.141332	0.0982693	-0.491724	-0.17339	-0.33738	-0.452556	-0.135496	-0.170715	-0.118391	0.198669	0.16345	-0.322248	-0.574207	-0.486506	-0.411214	-0.470362	-0.517819	0.049773	-0.009375	-0.056832			O14925	Mitochondrial import inner membrane translocase subunit Tim23 OS=Homo sapiens GN=TIMM23 PE=1 SV=1
-0.0878492	-0.0394326	-0.101119	-0.2116	-0.164761	-0.154252	-0.135466	-0.0886274	-0.0781184	-0.173218	-0.172764	-0.196071	-0.379141	-0.339362	-0.407185	-0.198457	-0.158678	-0.226501	-0.100515	-0.12186	-0.210096	-0.504309	-0.346358	-0.527339	-0.360152	-0.202201	-0.383182			O14929	Histone acetyltransferase type B catalytic subunit OS=Homo sapiens GN=HAT1 PE=1 SV=1
-0.181318	-0.36642	-0.331702	0.16024	-0.136522	-0.159403	0.453387	0.156625	0.133744	-0.193868	-0.230346	-0.163274	0.101984	0.141807	0.0070819	0.297813	0.337636	0.202911	-0.18173	-0.259991	-0.254683	0.108502	-0.0199513	-0.0248334	0.340637	0.212183	0.207301	Tight junction	ko04530	O14936	Peripheral plasma membrane protein CASK OS=Homo sapiens GN=CASK PE=1 SV=3
-0.0917407	-0.0758045	-0.27707	0.201813	0.421576	0.0857143	0.350018	0.569781	0.233919	0.57431	0.756926	0.344757	0.189185	0.712657	0.176518	-0.369479	0.153993	-0.382146	0.175106	0.176405	0.0423309	0.264834	0.314448	0.0820801	0.133553	0.183167	-0.0492005	Alzheimer's disease;Cardiac muscle contraction;Huntington's disease;Oxidative phosphorylation;Parkinson's disease	ko00190;ko04260;ko05010;ko05012;ko05016	O14949	Cytochrome b-c1 complex subunit 8 OS=Homo sapiens GN=UQCRQ PE=1 SV=4
-0.176622	-0.215703	-0.19324	-0.184012	-0.338358	-0.324024	0.0111763	-0.14317	-0.128836	-0.261662	-0.304949	-0.34637	-0.235317	-0.252608	-0.3635	0.06901	0.051719	-0.059173	-0.00733163	-0.269646	-0.104131	-0.14508	-0.22381	-0.0253219	-0.0180438	-0.0967738	0.101714	Focal adhesion;Leukocyte transendothelial migration;Regulation of actin cytoskeleton;Tight junction	ko04510;ko04530;ko04670;ko04810	O14950	Myosin regulatory light chain 12B OS=Homo sapiens GN=MYL12B PE=1 SV=2
-0.0950821	-0.190164	-0.116014	-0.135283	0.0103252	-0.0777969	-0.00152963	0.144079	0.0559565	0.0873108	-0.0555224	-0.0285422	0.0969405	0.00656364	0.0717672	0.0958584	0.00548157	0.0706851	-0.0811537	0.053622	-0.0552242	0.139861	0.0565096	0.0726691	0.167446	0.0840949	0.100254	Endocytosis;Phagosome	ko04144;ko04145	O14964	Hepatocyte growth factor-regulated tyrosine kinase substrate OS=Homo sapiens GN=HGS PE=1 SV=1
0.20718	0.592477	0.460389	-0.168518	0.224081	0.292162	-0.588533	-0.195934	-0.127853	0.256397	-0.0181644	0.151634	-0.534279	-0.816203	-0.708185	-0.664235	-0.946159	-0.838141	0.294498	0.435614	0.159659	-0.264441	-0.081078	-0.312961	-0.561031	-0.377668	-0.609551	Oocyte meiosis	ko04114	O14965	Aurora kinase A OS=Homo sapiens GN=AURKA PE=1 SV=2
-0.205611	-0.250815	-0.134442	-0.0168651	-0.208235	0.0142423	0.180091	-0.011279	0.211198	-0.159996	-0.188598	-0.358527	-0.16819	0.0354056	-0.179971	0.067517	0.271113	0.055736	-0.0254839	-0.0930433	0.0975213	0.126819	0.0700843	0.413641	0.133821	0.0770863	0.420643			O14966	Ras-related protein Rab-7L1 OS=Homo sapiens GN=RAB29 PE=1 SV=1
-0.455765	-0.329577	-0.348401	-0.152361	-0.137011	-0.208134	0.225553	0.240903	0.16978	-0.203682	-0.334593	-0.253494	-0.0648112	-0.209913	-0.1477	0.199112	0.05401	0.116223	-0.3121	-0.443504	-0.367319	-0.234147	-0.213471	-0.179081	0.140161	0.160837	0.195227			O14967	Calmegin OS=Homo sapiens GN=CLGN PE=1 SV=1
0.315702	0.162091	0.167104	0.125669	0.187486	-0.192858	-0.0892967	-0.0274797	-0.407824	0.0123536	0.170417	0.201604	0.127592	0.0779132	0.0835257	-0.000532867	-0.0502117	-0.0445992	0.0432896	0.0495835	0.0285544	0.0172573	0.00732673	0.0288698	-0.0232185	-0.0331491	-0.011606			O14972	Down syndrome critical region protein 3 OS=Homo sapiens GN=DSCR3 PE=2 SV=1
0.123133	0.0722471	0.108748	0.300004	0.364675	0.363697	0.198628	0.263299	0.262321	0.23798	0.153106	0.224534	0.388287	0.448067	0.464718	0.18308	0.24286	0.259511	0.0521443	0.0371649	0.0413939	0.389336	0.369935	0.402887	0.345768	0.326367	0.359319	Focal adhesion;Long-term potentiation;Regulation of actin cytoskeleton;Vascular smooth muscle contraction	ko04270;ko04510;ko04720;ko04810	O14974	Protein phosphatase 1 regulatory subunit 12A OS=Homo sapiens GN=PPP1R12A PE=1 SV=1
-0.36466	-0.277262	-0.268554	-0.00766342	-0.0213114	-0.0340699	0.295829	0.282181	0.269422	-0.376413	-0.499589	-0.429491	-0.416992	-0.495825	-0.33245	0.0181723	-0.0606607	0.102714	-0.27955	-0.273637	-0.301883	-0.324465	-0.258637	-0.319969	-0.0394417	0.0263863	-0.0349457	Peroxisome;PPAR signaling pathway	ko03320;ko04146	O14975	Very long-chain acyl-CoA synthetase OS=Homo sapiens GN=SLC27A2 PE=1 SV=2
0.00428324	-0.0535196	-0.0494336	0.0794492	0.12675	0.139336	0.112339	0.15964	0.172226	0.0973722	0.136362	0.118548	0.0368507	0.0348895	0.0672107	-0.0805767	-0.0825379	-0.0502167	0.0566502	0.106583	-0.000216887	0.0267342	-0.0296465	-0.0621017	-0.0276046	-0.0839853	-0.11644			O14976	Cyclin-G-associated kinase OS=Homo sapiens GN=GAK PE=1 SV=2
0.0622449	0.0378625	0.0785481	0.186674	0.125204	-0.0125776	0.127122	0.0656522	-0.0721294	-0.0403507	0.113343	0.0197716	0.0393858	0.447452	0.225834	0.0084645	0.416531	0.194913	0.0707856	0.05785	-0.0964906	-0.0307244	0.122541	0.0273384	-0.0414394	0.111826	0.0166234			O14979	Heterogeneous nuclear ribonucleoprotein D-like OS=Homo sapiens GN=HNRNPDL PE=1 SV=3
-0.178607	-0.0537468	-0.0668313	-0.188852	-0.0901875	-0.12888	-0.0891236	0.00954087	-0.0291516	-0.208468	-0.200743	-0.215628	-0.213933	-0.234641	-0.248168	-0.00565333	-0.0263613	-0.0398883	-0.0826484	-0.125935	-0.115739	-0.349147	-0.377172	-0.320361	-0.24104	-0.269065	-0.212254	Ribosome biogenesis in eukaryotes;RNA transport	ko03008;ko03013	O14980	Exportin-1 OS=Homo sapiens GN=XPO1 PE=1 SV=1
-0.107049	-0.142861	-0.0859441	-0.0488545	-0.0941253	-0.110633	0.0630969	0.0178261	0.00131837	-0.057568	-0.100479	-0.0119672	-0.22961	-0.263271	-0.137207	-0.172939	-0.2066	-0.0805356	-0.0781221	-0.0720342	-0.077474	-0.219388	-0.255742	-0.277821	-0.143511	-0.179865	-0.201944			O14981	TATA-binding protein-associated factor 172 OS=Homo sapiens GN=BTAF1 PE=1 SV=2
0.0916404	-0.22851	-0.0926793	0.295946	0.169075	0.397616	0.372462	0.245591	0.474132	-0.149154	0.00198268	-0.127518	0.0288838	-0.146145	-0.328299	0.120447	-0.0545819	-0.236736	0.16962	-0.014174	0.0740105	0.202406	0.0963106	-0.0610877	0.12592	0.0198251	-0.137573			O15013	Rho guanine nucleotide exchange factor 10 OS=Homo sapiens GN=ARHGEF10 PE=1 SV=4
0.121235	0.0986703	0.106699	0.0191033	-0.227154	-0.106685	-0.0897648	-0.336022	-0.215553	0.138965	-0.0466748	-0.00366268	-0.0449781	-0.299248	-0.28237	-0.0745206	-0.328791	-0.311913	0.0201651	0.0143109	-0.139301	-0.247812	-0.157196	-0.339537	-0.21287	-0.122254	-0.304595			O15014	Zinc finger protein 609 OS=Homo sapiens GN=ZNF609 PE=1 SV=2
-0.0193128	0.043403	0.040799	-0.0537116	-0.0273203	-0.0186286	-0.0753413	-0.04895	-0.0402583	-0.0215298	-0.00715723	-0.00308174	-0.167815	-0.0579901	-0.0638967	-0.157225	-0.0474005	-0.0533071	-0.0256809	0.01367	0.0766555	-0.112865	-0.135258	-0.0332634	-0.134413	-0.156806	-0.0548116			O15020	Spectrin beta chain, non-erythrocytic 2 OS=Homo sapiens GN=SPTBN2 PE=1 SV=3
0.518377	0.116489	0.290765	0.330781	0.124527	0.279592	0.0222373	-0.184017	-0.0289517	-0.100294	-0.0442924	-0.104578	0.238931	0.261381	0.194983	0.321986	0.344436	0.278038	3.42801	-0.70079	3.42763	3.53443	-0.601151	3.93267	1.48281	-2.65277	1.88105			O15021	Microtubule-associated serine/threonine-protein kinase 4 OS=Homo sapiens OX=9606 GN=MAST4 PE=1 SV=4
0.518377	0.116489	0.290765	0.330781	0.124527	0.279592	0.0222373	-0.184017	-0.0289517	-0.100294	-0.0442924	-0.104578	0.238931	0.261381	0.194983	0.321986	0.344436	0.278038	3.42801	-0.70079	3.42763	3.53443	-0.601151	3.93267	1.48281	-2.65277	1.88105			O15021	Microtubule-associated serine/threonine-protein kinase 4 OS=Homo sapiens GN=MAST4 PE=1 SV=3
0.077342	0.13691	0.211026	0.0285189	0.135483	0.0690657	-0.11324	-0.00627633	-0.0726936	-0.0353709	0.101175	0.0109483	-0.0649905	0.115554	0.0445738	-0.0905746	0.0899699	0.0189897	0.0979008	0.12879	0.0183149	0.031155	0.0383636	-0.0344637	-0.0505136	-0.043305	-0.116132			O15027	Protein transport protein Sec16A OS=Homo sapiens OX=9606 GN=SEC16A PE=1 SV=4
0.077342	0.13691	0.211026	0.0285189	0.135483	0.0690657	-0.11324	-0.00627633	-0.0726936	-0.0353709	0.101175	0.0109483	-0.0649905	0.115554	0.0445738	-0.0905746	0.0899699	0.0189897	0.0979008	0.12879	0.0183149	0.031155	0.0383636	-0.0344637	-0.0505136	-0.043305	-0.116132			O15027	Protein transport protein Sec16A OS=Homo sapiens GN=SEC16A PE=1 SV=3
-0.0759777	-0.0993565	-0.040765	0.197466	0.149486	0.150459	0.269499	0.221519	0.222492	-0.129299	-0.0903016	-0.0682899	-0.0869945	-0.0479801	-0.0804283	0.008969	0.0479834	0.0155352	0.0725037	0.0140076	0.020253	0.034669	-0.0110452	0.0878291	-0.0009191	-0.0466333	0.052241	Axon guidance	ko04360	O15031	Plexin-B2 OS=Homo sapiens GN=PLXNB2 PE=1 SV=3
-0.0402745	0.16051	0.430133	0.00302442	-0.0909531	-0.137921	-0.180432	-0.274409	-0.321377	2.63197	0.266769	-2.22004	2.47631	-0.153982	0.342981	2.25008	-0.380215	0.116748	-2.6451	0.269399	-2.48704	-0.645692	-3.22582	-0.470329	0.975222	-1.60491	1.15058			O15037	Protein KHNYN OS=Homo sapiens GN=KHNYN PE=1 SV=3
0.229142	0.603206	0.604004	0.799324	0.820428	0.704555	0.32054	0.341644	0.225771	0.504268	0.502033	1.17148	1.12233	1.45243	1.87566	0.396403	0.726503	1.14973	-0.599288	0.479951	0.529184	0.878102	0.79616	0.81778	0.741486	0.659544	0.681164			O15040	Tectonin beta-propeller repeat-containing protein 2 OS=Homo sapiens GN=TECPR2 PE=1 SV=4
-0.0393988	-0.022179	-0.00507313	-0.0385946	-0.0303709	-0.0860616	-0.0163776	-0.00815392	-0.0638446	-0.0481279	-0.163824	-0.08585	-0.183229	-0.183458	-0.175254	-0.0839617	-0.0841907	-0.0759867	0.0765034	0.100381	0.0496163	-0.0856245	-0.107072	-0.0997382	-0.161125	-0.182572	-0.175238	Spliceosome	ko03040	O15042	U2 snRNP-associated SURP motif-containing protein OS=Homo sapiens GN=U2SURP PE=1 SV=2
-0.367839	-0.0869647	-0.0838956	-0.306828	-0.189728	-0.067151	-0.127262	-0.0101616	0.112415	-0.187978	0.287873	-0.075763	0.00504576	0.373966	0.0457147	-0.00299824	0.365922	0.0376707	-0.217625	-0.0311625	-0.370572	-0.367552	-0.192046	-0.417958	-0.161099	0.0144072	-0.211505	Lysine degradation	ko00310	O15047	Histone-lysine N-methyltransferase SETD1A OS=Homo sapiens GN=SETD1A PE=1 SV=3
0.0385056	-0.118894	0.0229227	0.222698	0.116749	0.0593149	0.241853	0.135904	0.0784701	0.176388	0.229283	0.129137	0.195992	0.289392	0.101708	0.0177227	0.111123	-0.0765613	0.258143	0.293709	0.0695367	0.139905	0.117865	0.128834	-0.0672246	-0.0892646	-0.0782956			O15066	Kinesin-like protein KIF3B OS=Homo sapiens GN=KIF3B PE=1 SV=1
0.0684785	0.000886666	0.0103509	-0.0801636	-0.116375	-0.0121719	-0.106736	-0.142947	-0.0387439	-0.145499	-0.156884	-0.103018	-0.16577	-0.219957	-0.128475	-0.0306363	-0.0848233	0.00665867	-0.0901342	-0.0915431	-0.0684501	-0.190491	-0.17447	-0.137985	-0.107115	-0.0910942	-0.0546092	Purine metabolism	ko00230	O15067	Phosphoribosylformylglycinamidine synthase OS=Homo sapiens GN=PFAS PE=1 SV=4
-0.0740564	0.265919	0.230698	0.0410076	0.534274	0.373628	-0.0998459	0.39342	0.232774	0.456234	0.471222	0.441715	0.595687	0.612061	0.463463	0.139297	0.155671	0.00707267	0.612296	0.366286	0.411422	0.660466	0.45186	0.577435	0.197131	-0.0114747	0.1141			O15068	Guanine nucleotide exchange factor DBS OS=Homo sapiens GN=MCF2L PE=1 SV=2
-0.55191	-0.38633	-0.39731	-0.694607	-0.502121	-0.149306	-0.249424	-0.0569377	0.295877	0.465981	0.384953	0.392389	-0.0384959	-0.202931	-0.313304	-0.452937	-0.617372	-0.727745	-0.35675	-0.416304	-0.248121	-0.432896	-0.462585	-0.380636	-0.0925043	-0.122193	-0.0402443			O15078	Centrosomal protein of 290 kDa OS=Homo sapiens GN=CEP290 PE=1 SV=2
0.124443	0.188031	0.173668	-0.0328451	0.112944	0.110288	-0.194892	-0.0491033	-0.0517593	0.020728	0.0465016	-0.0639591	0.0656751	0.099062	0.105948	0.0645849	0.0979718	0.104858	0.0119844	0.0454084	-0.0143618	0.221675	0.183613	0.0619724	0.207331	0.169269	0.0476287			O15084	Serine/threonine-protein phosphatase 6 regulatory ankyrin repeat subunit A OS=Homo sapiens GN=ANKRD28 PE=1 SV=5
0.336026	0.0974135	0.114911	0.122959	-0.122471	0.019268	-0.0598245	-0.305254	-0.163515	0.297668	0.0471301	0.0331822	0.255924	0.0780413	0.754425	0.129931	-0.0479521	0.628432	-0.0559332	-0.045801	-0.1297	0.135069	0.169429	0.168576	0.212214	0.246574	0.245721	ko05152;Vascular smooth muscle contraction	ko04270;ko05152	O15085	Rho guanine nucleotide exchange factor 11 OS=Homo sapiens GN=ARHGEF11 PE=1 SV=1
-0.0466698	-0.025333	0.0359565	0.15019	0.0790123	0.221767	0.162205	0.0910277	0.233782	0.128058	-0.00984023	0.033791	-0.240241	-0.239325	-0.333594	-0.290911	-0.289995	-0.384264	-0.240168	-0.298633	-0.105909	-0.191656	-0.119482	-0.0729275	0.0232473	0.0954213	0.141976			O15091	Mitochondrial ribonuclease P protein 3 OS=Homo sapiens GN=KIAA0391 PE=1 SV=2
-0.0961493	-0.153984	-0.0169227	-0.017723	0.471682	0.0513262	0.0712957	0.560701	0.140345	0.685183	0.107899	0.0367685	0.854291	0.343551	-0.0996705	0.577674	0.0669342	-0.376287	0.277499	-0.0333956	0.0063784	0.274667	0.424171	0.285163	0.191173	0.340677	0.201669	Acute myeloid leukemia;Adipocytokine signaling pathway;Apoptosis;B cell receptor signaling pathway;Chagas disease (American trypanosomiasis);Chemokine signaling pathway;Chronic myeloid leukemia;Cytosolic DNA-sensing pathway;Epithelial cell signaling in Helicobacter pylori infection;Hepatitis C;MAPK signaling pathway;Measles;NOD-like receptor signaling pathway;Osteoclast differentiation;Pancreatic…	ko04010;ko04062;ko04210;ko04380;ko04620;ko04621;ko04622;ko04623;ko04660;ko04662;ko04920;ko05120;ko05131;ko05142;ko05145;ko05160;ko05162;ko05200;ko05212;ko05215;ko05220;ko05221;ko05222	O15111	Inhibitor of nuclear factor kappa-B kinase subunit alpha OS=Homo sapiens GN=CHUK PE=1 SV=2
0.0183547	0.0315243	-0.127829	0.0521252	0.0462266	-0.0665745	0.0781085	0.0722099	-0.0405912	0.0829185	0.00471184	0.170771	0.029725	-0.0592896	-0.124092	-0.0564088	-0.145423	-0.210226	0.195697	0.135911	-0.0227001	0.043219	0.0891349	-0.122812	-0.0597503	-0.0138344	-0.225781	RNA degradation	ko03018	O15116	U6 snRNA-associated Sm-like protein LSm1 OS=Homo sapiens GN=LSM1 PE=1 SV=1
-0.0885199	-0.0805594	-0.18589	-0.254454	-0.114259	-0.0844594	-0.136131	0.0040641	0.0338637	-0.123438	-0.109712	-0.407556	-0.00797515	0.029346	0.0491802	0.205594	0.242915	0.262749	0.140506	0.150385	0.294192	0.386282	0.332141	0.454436	0.191254	0.137113	0.259408	Lysosome	ko04142	O15118	Niemann-Pick C1 protein OS=Homo sapiens GN=NPC1 PE=1 SV=2
-0.0146998	0.21071	-0.0752089	-0.252234	-0.151765	-0.251589	-0.292501	-0.192032	-0.291856	-0.00135011	-0.191363	-0.10534	-0.387847	-0.461503	-0.428924	-0.288496	-0.362152	-0.329573	-0.0321656	-0.00273355	0.0695226	-0.26178	-0.330469	-0.214397	-0.273321	-0.34201	-0.225938			O15119	T-box transcription factor TBX3 OS=Homo sapiens GN=TBX3 PE=1 SV=4
-0.499608	-0.544918	-0.432734	-0.0186819	-0.0247337	-0.149511	0.473738	0.467686	0.342909	-0.00549845	-0.277344	-0.115924	-0.124532	-0.265814	-0.25446	0.00839015	-0.132892	-0.121538	-0.175284	-0.0567445	-0.100289	-0.179923	-0.064457	-0.125101	-0.0691505	0.0463155	-0.0143285	Sphingolipid metabolism	ko00600	O15121	Sphingolipid delta(4)-desaturase DES1 OS=Homo sapiens GN=DEGS1 PE=1 SV=1
-0.173449	-0.183999	-0.3609	0.0168776	0.080642	0.0385743	0.256327	0.320091	0.278024	-0.253801	-0.308503	-0.27468	0.0563914	-0.124685	0.00620683	0.335386	0.15431	0.285201	-0.455933	-0.345246	-0.229214	-0.0543696	-0.0265403	0.0889771	0.289095	0.316924	0.432441			O15126	Secretory carrier-associated membrane protein 1 OS=Homo sapiens GN=SCAMP1 PE=1 SV=2
0.166113	-0.0463314	0.222361	0.29821	-0.0290216	0.23584	0.184162	-0.143069	0.121792	-0.140139	0.101733	0.161697	0.0118495	0.248227	0.176299	-0.0292475	0.20713	0.135202	0.254133	0.135206	0.118378	0.0536005	0.162847	0.190685	-0.115639	-0.006392	0.021446			O15127	Secretory carrier-associated membrane protein 2 OS=Homo sapiens GN=SCAMP2 PE=1 SV=2
-0.671091	-0.517857	-0.53535	-0.349896	-0.38812	-0.268605	0.22487	0.186646	0.306161	-2.31433	-1.08503	-0.453954	-1.24319	-0.947118	-1.0682	0.041248	0.33732	0.216238	-0.135339	-0.433152	-0.235798	-0.47436	-0.522351	-0.71051	-0.206264	-0.254255	-0.442414			O15131	Importin subunit alpha-6 OS=Homo sapiens GN=KPNA5 PE=1 SV=2
0.135449	0.0315294	0.00905662	0.0185365	0.104148	-0.0339701	-0.0401418	0.0454697	-0.0926484	0.222106	0.260275	0.306216	0.0737387	0.178218	0.236474	-0.189127	-0.0846477	-0.0263917	0.356392	0.393782	0.260685	0.215263	0.357842	0.161456	-0.12169	0.020889	-0.175497	Bacterial invasion of epithelial cells;Fc gamma R-mediated phagocytosis;Pathogenic Escherichia coli infection;Regulation of actin cytoskeleton;Shigellosis	ko04666;ko04810;ko05100;ko05130;ko05131	O15143	Actin-related protein 2/3 complex subunit 1B OS=Homo sapiens GN=ARPC1B PE=1 SV=3
0.0362034	-0.00123235	0.222539	-0.0348059	-0.0493578	0.147495	-0.120643	-0.135194	0.0616583	0.0138379	-0.252648	-0.173019	-0.137224	-0.332021	-0.250094	5.23667e-05	-0.194745	-0.112818	0.111682	0.182197	0.0817481	0.15292	0.104757	0.197125	0.027711	-0.020452	0.071916	Bacterial invasion of epithelial cells;Fc gamma R-mediated phagocytosis;Pathogenic Escherichia coli infection;Regulation of actin cytoskeleton;Shigellosis	ko04666;ko04810;ko05100;ko05130;ko05131	O15144	Actin-related protein 2/3 complex subunit 2 OS=Homo sapiens GN=ARPC2 PE=1 SV=1
0.227249	0.11348	0.244551	0.217012	0.117636	0.255809	0.0219187	-0.0774573	0.0607157	0.131052	0.311164	0.440811	0.0894977	0.0532324	0.333001	-0.204845	-0.24111	0.0386587	0.0436943	-0.0261203	0.05976	0.0922711	-0.129851	0.0896328	0.0664931	-0.155629	0.0638548	Bacterial invasion of epithelial cells;Fc gamma R-mediated phagocytosis;Pathogenic Escherichia coli infection;Regulation of actin cytoskeleton;Shigellosis	ko04666;ko04810;ko05100;ko05130;ko05131	O15145	Actin-related protein 2/3 complex subunit 3 OS=Homo sapiens GN=ARPC3 PE=1 SV=3
0.539826	0.29747	0.270352	1.05285	0.694416	0.927482	0.683634	0.3252	0.558266	0.570804	0.192411	0.489131	0.308282	-0.177993	0.515144	-0.109167	-0.595442	0.0976953	0.268177	0.51001	0.193416	-0.197693	0.0940759	-0.23275	-0.521561	-0.229792	-0.556618	p53 signaling pathway	ko04115	O15151	Protein Mdm4 OS=Homo sapiens GN=MDM4 PE=1 SV=2
0.600372	0.391379	0.521734	0.58289	0.529809	0.592542	0.078395	0.025314	0.088047	0.262907	-0.130529	0.0549074	0.403776	0.130485	0.225086	0.341348	0.0680565	0.162658	0.0668355	0.257836	0.424173	0.201723	0.389179	0.31516	-0.0478918	0.139564	0.0655452			O15156	Zinc finger and BTB domain-containing protein 7B OS=Homo sapiens GN=ZBTB7B PE=1 SV=2
-0.012209	0.00473689	-0.0227185	-0.0471728	-0.0191076	0.0433172	-0.0371093	-0.00904406	0.0533807	0.10434	0.0726453	-0.0231426	0.0661998	-0.0477505	0.105414	0.0149189	-0.0990314	0.0541331	0.132358	0.00370876	0.0688095	0.223432	0.0663637	0.132579	0.15514	-0.00192839	0.0642869	Cytosolic DNA-sensing pathway;Purine metabolism;Pyrimidine metabolism;RNA polymerase	ko00230;ko00240;ko03020;ko04623	O15160	DNA-directed RNA polymerases I and III subunit RPAC1 OS=Homo sapiens GN=POLR1C PE=1 SV=1
-0.0766528	-0.0469802	-0.0415837	-0.0152298	0.0567793	0.0619585	0.0398424	0.111852	0.117031	-0.125804	-0.0992907	-0.113977	0.0734476	0.0956156	0.111971	0.186472	0.208639	0.224995	-0.0072246	-0.114055	-0.046892	0.102717	-0.0177389	0.0966499	0.158774	0.0383183	0.152707			O15164	Transcription intermediary factor 1-alpha OS=Homo sapiens GN=TRIM24 PE=1 SV=3
-0.0560266	-0.102503	0.0563537	0.160081	-0.015803	0.2431	0.19414	0.0182556	0.277159	0.428538	0.139994	0.278476	0.224954	0.0321355	0.259376	-0.057382	-0.2502	-0.02296	0.144682	0.0231172	-0.0728424	0.094443	0.084641	-0.0220776	0.0627907	0.0529887	-0.0537299			O15173	Membrane-associated progesterone receptor component 2 OS=Homo sapiens GN=PGRMC2 PE=1 SV=1
-0.897039	-0.555922	-0.397041	-0.213223	-0.190421	-0.409388	0.403444	0.426246	0.207279	0.00210852	-0.0560584	0.172155	-0.497269	-0.347051	-0.313682	-0.536671	-0.386453	-0.353084	0.0905918	0.025708	-0.268062	-0.372039	-0.532447	-0.516056	-0.321452	-0.48186	-0.465469			O15182	Centrin-3 OS=Homo sapiens GN=CETN3 PE=1 SV=2
-0.0165586	0.138819	0.00707635	-0.0463758	0.136312	-0.0444379	-0.089488	0.0931997	-0.0875501	0.202694	-0.0432326	0.0721927	0.210272	0.379481	0.185624	0.133054	0.302263	0.108406	0.259119	0.267474	0.161879	0.205727	0.0507935	0.0915914	-0.0237637	-0.178697	-0.137899			O15211	Ral guanine nucleotide dissociation stimulator-like 2 OS=Homo sapiens GN=RGL2 PE=1 SV=1
-0.117611	0.0258457	0.0867167	-0.0395483	0.152704	0.133904	-0.0378654	0.154387	0.135587	0.127064	0.0608511	0.149274	0.0832663	0.0417722	0.321217	-0.0291301	-0.0706242	0.208821	0.0406872	-0.0906769	0.00705213	0.0332543	0.0930561	0.0220014	0.0475668	0.107369	0.0363139			O15212	Prefoldin subunit 6 OS=Homo sapiens GN=PFDN6 PE=1 SV=1
0.178224	-0.0498726	0.26097	0.171667	0.217177	0.391818	0.0418932	0.0874032	0.262044	0.198722	0.104924	0.0322209	0.319832	0.226271	0.324765	0.207876	0.114315	0.212809	0.304617	0.374097	0.316881	0.464402	0.447211	0.461573	0.132537	0.115346	0.129708			O15213	WD repeat-containing protein 46 OS=Homo sapiens GN=WDR46 PE=1 SV=3
0.0866527	-0.0164558	0.113667	-0.0119531	-0.0380109	0.145815	-0.0732411	-0.0992989	0.084527	0.0224532	0.0648753	0.0164372	0.153561	0.101395	0.126005	0.118972	0.0668064	0.0914164	-0.0786399	-0.103836	-0.0476172	0.0203414	-0.0487223	-0.0842658	0.0970391	0.0279754	-0.0075681			O15226	NF-kappa-B-repressing factor OS=Homo sapiens GN=NKRF PE=1 SV=2
-0.738187	-0.457429	-0.446157	-0.34198	-0.196507	-0.840099	0.205278	0.350751	-0.292841	-0.457499	-0.225052	-0.542299	-0.122622	0.0513645	-0.145229	0.285661	0.459648	0.263054	-0.376622	-0.377751	-0.00260748	-0.0752208	-0.0830764	0.0455265	0.177106	0.16925	0.297853	Glycerophospholipid metabolism;Peroxisome	ko00564;ko04146	O15228	Dihydroxyacetone phosphate acyltransferase OS=Homo sapiens GN=GNPAT PE=1 SV=1
-0.123082	-0.117588	-0.0199566	-0.0162695	-0.0671415	0.04731	0.070606	0.019734	0.134186	-0.0362065	0.0556434	0.0543197	-0.0595277	-0.0714901	0.0174641	-0.0841132	-0.0960756	-0.00712143	0.347343	0.182688	0.262039	0.25271	0.0492281	0.0803653	-0.0113133	-0.214795	-0.183658	Amoebiasis;ECM-receptor interaction;Focal adhesion;Pathways in cancer;Small cell lung cancer;Toxoplasmosis	ko04510;ko04512;ko05145;ko05146;ko05200;ko05222	O15230	Laminin subunit alpha-5 OS=Homo sapiens GN=LAMA5 PE=1 SV=8
0.0597234	-0.1594	0.0115193	-0.293557	-0.192073	-0.376222	-0.264171	-0.162687	-0.346836	-0.0364029	0.0748025	0.0856731	-0.0155086	0.0429879	-0.165501	-0.0568662	0.00163033	-0.206859	0.0837435	-0.2593	0.0333982	-0.0513562	-0.0756119	-0.0440366	-0.0039701	-0.0282258	0.0033495			O15231	Zinc finger protein 185 OS=Homo sapiens GN=ZNF185 PE=1 SV=3
0.382047	0.1245	0.123978	0.452353	0.434032	0.309708	0.242178	0.223857	0.099533	0.0676969	0.453781	0.269343	0.222852	0.356964	0.144346	-0.040755	0.093357	-0.119261	0.067864	-0.248237	0.00430814	0.168631	-0.105663	-0.0932499	0.227319	-0.0469747	-0.0345616	mRNA surveillance pathway;RNA transport	ko03013;ko03015	O15234	Protein CASC3 OS=Homo sapiens GN=CASC3 PE=1 SV=2
0.344547	0.250965	0.569204	0.188546	0.353148	0.474537	-0.199693	-0.0350907	0.0862983	0.203606	0.22746	0.187138	0.124988	0.214326	0.264139	-0.08108	0.008258	0.058071	0.204239	-0.0279238	-0.374312	0.556946	0.294422	0.0477273	0.622945	0.360421	0.113726			O15235	28S ribosomal protein S12, mitochondrial OS=Homo sapiens GN=MRPS12 PE=1 SV=1
-0.192727	-0.227697	-0.23073	-0.279686	-0.137554	-0.0883905	-0.0626347	0.0794973	0.128661	-0.093118	-0.0250309	-0.0297829	-0.0230553	0.0778894	0.106676	0.0262553	0.1272	0.155987	-0.138109	-0.150809	-0.173953	0.287534	0.0479674	0.211013	0.441824	0.202258	0.365303	alpha-Linolenic acid metabolism;Biosynthesis of unsaturated fatty acids;Fatty acid metabolism;Peroxisome;PPAR signaling pathway	ko00071;ko00592;ko01040;ko03320;ko04146	O15254	Peroxisomal acyl-coenzyme A oxidase 3 OS=Homo sapiens GN=ACOX3 PE=1 SV=2
-0.365799	-0.351668	-0.49129	-0.208882	-0.396795	-0.321955	0.194037	0.006124	0.080964	-0.255592	-0.293721	-0.259105	-0.296959	-0.0305427	-0.0941171	-0.0274863	0.23893	0.175356	-0.508316	-0.280029	-0.230863	-0.186858	-0.0711363	-0.247795	0.152878	0.2686	0.091941			O15258	Protein RER1 OS=Homo sapiens GN=RER1 PE=1 SV=1
-0.441057	-0.419621	-0.21952	-0.176223	-0.31276	-0.304733	0.183843	0.047306	0.055333	-0.481522	-0.305683	-0.305824	-0.478891	-0.465816	-0.655494	-0.114548	-0.101473	-0.291151	-0.0731396	-0.200097	-0.106687	-0.31725	-0.159751	-0.153501	-0.190609	-0.0331098	-0.0268598			O15260	Surfeit locus protein 4 OS=Homo sapiens GN=SURF4 PE=1 SV=3
0.192721	-0.0276658	0.0842517	0.339338	0.248236	0.419886	0.256236	0.165134	0.336784	0.181213	0.209941	0.177285	0.118822	0.0115494	0.137073	-0.0706577	-0.17793	-0.0524067	0.00210484	0.132145	0.0443382	-0.0321857	-0.0333613	0.0579542	-0.091715	-0.0928906	-0.00157515	Sphingolipid metabolism	ko00600	O15269	Serine palmitoyltransferase 1 OS=Homo sapiens GN=SPTLC1 PE=1 SV=1
-0.0104442	-0.0283845	-0.0126086	-0.00294957	0.150553	0.25892	0.0141962	0.167699	0.276066	0.298469	0.0607576	-0.0489813	0.0102325	-0.0420932	-0.0951022	-0.0931826	-0.145508	-0.198517	0.0973812	0.094246	0.194132	0.0378443	0.00621276	0.0463411	-0.0907421	-0.122374	-0.0822453	Sphingolipid metabolism	ko00600	O15270	Serine palmitoyltransferase 2 OS=Homo sapiens GN=SPTLC2 PE=1 SV=1
-0.752385	-0.543627	-0.676113	-0.885589	-1.24836	-1.39207	-0.228214	-0.590985	-0.734695	-0.628823	-0.926362	-1.70799	-2.63913	-2.29506	-2.85802	-1.55141	-1.20733	-1.77029	-0.468272	-0.156795	-0.171855	-1.52993	-0.984109	-0.877815	-1.26429	-0.718468	-0.612174			O15287	Fanconi anemia group G protein OS=Homo sapiens GN=FANCG PE=1 SV=1
0.124667	0.0592932	0.073969	-0.0147683	-0.105901	-0.0604032	-0.100745	-0.191877	-0.14638	-0.124437	-0.0286681	-0.105487	-0.0842053	-0.0145686	0	0.00199207	0.0716288	0.0861974	-0.0777682	-0.00285423	0.00720613	-0.13771	-0.0670724	-0.0475696	-0.113238	-0.0426003	-0.0230975	Other types of O-glycan biosynthesis	ko00514	O15294	UDP-N-acetylglucosamine--peptide N-acetylglucosaminyltransferase 110 kDa subunit OS=Homo sapiens GN=OGT PE=1 SV=3
-0.073327	-0.0270132	-0.0412572	-0.111919	-0.00573676	-0.0903027	-0.0647199	0.0414624	-0.0431036	0.172751	-0.0264892	0.0793474	0.223686	0.0467637	0.241835	0.148483	-0.0284394	0.166632	-0.113902	0.104954	0.0200464	0.0785374	0.279151	0.262957	0.0748379	0.275452	0.259258	Amino sugar and nucleotide sugar metabolism;Fructose and mannose metabolism	ko00051;ko00520	O15305	Phosphomannomutase 2 OS=Homo sapiens GN=PMM2 PE=1 SV=1
-0.0528627	-0.238105	-0.0416308	0.176102	-0.124974	0.0925191	0.286968	-0.0141078	0.203385	0.136279	-0.102632	-0.17766	-0.0248936	-0.263647	-0.286639	0.0231107	-0.215643	-0.238635	-0.0314726	-0.208059	-0.347021	-0.366848	-0.54366	-0.486336	-0.17133	-0.348142	-0.290818	Cytosolic DNA-sensing pathway;Purine metabolism;Pyrimidine metabolism;RNA polymerase	ko00230;ko00240;ko03020;ko04623	O15318	DNA-directed RNA polymerase III subunit RPC7 OS=Homo sapiens GN=POLR3G PE=1 SV=2
-0.422957	-0.253087	-0.423529	-0.102258	-0.0895428	-0.271527	0.264266	0.276982	0.0949973	-0.316199	-0.380121	-0.273494	-0.315539	-0.355452	-0.243486	0.00773233	-0.0321807	0.0797853	0.0745974	-0.00493213	-0.202639	-0.064108	-0.103065	-0.170587	-0.0197834	-0.0587404	-0.126262			O15321	Transmembrane 9 superfamily member 1 OS=Homo sapiens GN=TM9SF1 PE=2 SV=2
-0.218115	0.0369226	-0.255697	-0.0876844	-0.158289	-0.146255	0.0579454	-0.0126592	-0.0006252	-0.23516	-0.289646	-0.20748	-0.0552105	-0.0255647	0.00574052	0.188885	0.218531	0.249836	-0.240387	-0.228553	-0.289911	0.171825	0.160732	0.156494	0.424775	0.413682	0.409444	Inositol phosphate metabolism;Phosphatidylinositol signaling system	ko00562;ko04070	O15327	Type II inositol 3,4-bisphosphate 4-phosphatase OS=Homo sapiens GN=INPP4B PE=2 SV=4
0.180656	0.276657	-0.00887441	0.240102	0.128315	0.0520802	0.0906225	-0.0211645	-0.0973993	0.0746474	0.0243127	-0.0254652	0.275373	0.0617427	0.0193508	0.250875	0.0372444	-0.0051475	-0.181343	0.00140699	-0.0496142	-0.245754	-0.151363	-0.170249	-0.169237	-0.0748463	-0.0937323			O15347	High mobility group protein B3 OS=Homo sapiens GN=HMGB3 PE=1 SV=4
0.0275034	-0.0848535	-0.0450317	-0.0894907	-0.027197	-0.0604559	-0.0553634	0.00693027	-0.0263286	-0.0240649	-0.0194968	0.0273551	-0.113585	-0.114786	-0.0575904	-0.108183	-0.109384	-0.0521882	0.0268743	-0.0611935	-0.0752069	0.0969646	-0.121682	-0.111287	0.133473	-0.0851733	-0.0747783			O15355	Protein phosphatase 1G OS=Homo sapiens GN=PPM1G PE=1 SV=1
0.135608	0.0745448	0.105735	0.0724069	0.134893	0.117923	-0.032889	0.0295971	0.0126271	0.0175997	0.0181779	-0.0214188	0.127381	0.0600794	-0.00969791	0.122595	0.0552931	-0.0144842	0.0883457	0.143286	0.0690947	0.0434048	0.139651	-0.0352447	-0.0568373	0.0394089	-0.135487	RNA transport	ko03013	O15371	Eukaryotic translation initiation factor 3 subunit D OS=Homo sapiens GN=EIF3D PE=1 SV=1
0.0114008	0.0472819	0.129956	-0.00791666	0.0984466	0.104146	-0.0707962	0.035567	0.0412664	-0.012845	0.0208825	-0.00887171	0.086271	0.00636152	-0.0637827	0.0865491	0.00663959	-0.0635046	-0.00333447	-0.0532046	-0.131932	-0.00600984	0.0161378	-0.167082	0.0568138	0.0789615	-0.104258	Measles;RNA transport	ko03013;ko05162	O15372	Eukaryotic translation initiation factor 3 subunit H OS=Homo sapiens GN=EIF3H PE=1 SV=1
0.376915	-0.560105	0.0170478	0.183057	-0.889449	-0.202609	0.238438	-0.834068	-0.147228	-0.107999	-0.342032	-0.149454	-0.068462	-0.394127	-0.153468	0.131366	-0.194299	0.0463603	-0.45777	-0.536531	-0.72456	-0.88595	-0.897398	-0.936256	-0.312996	-0.324444	-0.363302			O15379	Histone deacetylase 3 OS=Homo sapiens GN=HDAC3 PE=1 SV=2
0.146529	0.0330196	0.159894	-0.0229818	-0.0668411	-0.0322004	-0.136129	-0.179989	-0.145348	-0.0160233	-0.076229	-0.027529	0.0340976	-0.0532694	0.0141732	0.0740247	-0.0133423	0.0541003	-0.0495828	-0.0446382	-0.1031	-0.144368	-0.125013	-0.142239	-0.0785943	-0.0592393	-0.0764653	Ribosome biogenesis in eukaryotes	ko03008	O15381	Nuclear valosin-containing protein-like OS=Homo sapiens GN=NVL PE=1 SV=1
0.363119	0.0522483	0.0816775	-0.0349479	-0.0714566	-0.00339937	-0.20063	-0.237138	-0.169081	0.392231	0.308726	0.479126	-0.00124393	0.0182224	-0.018277	-0.394605	-0.375139	-0.411638	-4.34464e-05	-0.210004	-0.164383	-0.294359	-0.3225	-0.339845	-0.169549	-0.19769	-0.215035	Pantothenate and CoA biosynthesis;Valine, leucine and isoleucine biosynthesis;Valine, leucine and isoleucine degradation	ko00280;ko00290;ko00770	O15382	Branched-chain-amino-acid aminotransferase, mitochondrial OS=Homo sapiens GN=BCAT2 PE=1 SV=2
0.00906311	0.0559355	-0.22057	0.0860475	-0.00393235	-0.353706	0.137905	0.0479248	-0.301849	0.155505	0.278861	0.107319	-0.649303	-0.816605	-0.712554	-0.829865	-0.997167	-0.893116	0.133142	0.0637302	0.183201	-0.330383	-0.320361	-0.751665	-0.457074	-0.447052	-0.878356	Colorectal cancer;Pathways in cancer	ko05200;ko05210	O15392	Baculoviral IAP repeat-containing protein 5 OS=Homo sapiens GN=BIRC5 PE=1 SV=3
-1.14359	-0.841938	-0.901232	-1.669	-1.69017	-1.55132	-0.706747	-0.727917	-0.589067	-0.6338	-0.42926	-0.596268	-1.30891	-1.20262	-1.10972	-0.755801	-0.649511	-0.556611	0.115884	0.110975	0.18487	-0.235363	-0.399245	-0.255801	-0.372606	-0.536488	-0.393044			O15393	Transmembrane protease serine 2 OS=Homo sapiens GN=TMPRSS2 PE=1 SV=3
0.0664196	0.06572	0.0378127	0.0472413	0.124413	0.115483	-0.00940947	0.0677622	0.0588322	0.125101	0.244692	0.209697	0.200719	0.126991	0.05389	0.00755567	-0.0661723	-0.139273	0.190504	0.203781	0.236472	0.255086	0.14571	0.132925	0.0448337	-0.0645423	-0.0773273	Cell adhesion molecules (CAMs);Prion diseases	ko04514;ko05020	O15394	Neural cell adhesion molecule 2 OS=Homo sapiens GN=NCAM2 PE=1 SV=2
-0.0823882	-0.0669982	-0.0221798	-0.24715	-0.191178	-0.128671	-0.189961	-0.133989	-0.0714823	-0.11722	-0.139047	-0.207002	0.0944707	-0.0448641	-0.149588	0.248894	0.109559	0.004835	-0.0738407	-0.220631	-0.0277526	0.00795108	-0.121997	-0.015434	0.115359	-0.0145889	0.0919741			O15397	Importin-8 OS=Homo sapiens GN=IPO8 PE=1 SV=2
-0.0336247	-0.0464636	-0.0778917	-0.0729981	0.0913738	0.0330672	-0.0203381	0.144034	0.0857272	0.102965	-0.0775837	-0.154575	-0.118539	-0.180695	-0.302983	-0.0754744	-0.13763	-0.259918	0.0346864	-0.180695	-0.0761332	0.041917	-0.0169207	0.107103	0.115964	0.0571266	0.18115	Phagosome;SNARE interactions in vesicular transport	ko04130;ko04145	O15400	Syntaxin-7 OS=Homo sapiens GN=STX7 PE=1 SV=4
-0.428364	-0.383632	-0.3459	-0.351143	-0.190078	-0.250963	0.0348223	0.195887	0.135002	-0.288211	-0.305021	-0.236217	-0.329589	-0.321897	-0.306294	-0.053106	-0.045414	-0.029811	-0.392576	-0.356499	-0.434107	-0.187501	-0.188519	-0.226829	0.206893	0.205875	0.167565	ABC transporters;Bile secretion	ko02010;ko04976	O15439	Multidrug resistance-associated protein 4 OS=Homo sapiens GN=ABCC4 PE=1 SV=3
0.0118248	-0.100949	-0.00731092	0.116473	0.0649069	0.0649003	0.148618	0.0970519	0.0970453	0.0739315	-0.262605	-0.194482	0.180377	-0.103929	0.0942132	0.308095	0.0237895	0.221932	-0.209042	-0.202556	-0.218619	-0.0164983	-0.11859	-0.0156125	0.193574	0.0914823	0.19446			O15446	DNA-directed RNA polymerase I subunit RPA34 OS=Homo sapiens GN=CD3EAP PE=1 SV=1
-0.622147	-0.137362	-0.0591347	-0.112092	0.0266145	0.0467658	0.160789	0.299496	0.319647	0.270389	1.02981	0.457963	0.0190228	0.485384	-0.104376	-0.567031	-0.10067	-0.69043	0.86303	0.809317	0.640947	0.34166	0.183818	0.351253	-0.429438	-0.58728	-0.419845	Arginine and proline metabolism	ko00330	O15460	Prolyl 4-hydroxylase subunit alpha-2 OS=Homo sapiens GN=P4HA2 PE=1 SV=1
0.174145	0.0983208	0.283898	0.0299932	0.019044	0.067444	-0.155461	-0.166411	-0.118011	0.350525	0.169882	0.275999	-0.251396	-0.109376	-0.237393	-0.516865	-0.374845	-0.502862	-0.000631968	-0.0501191	0.0453554	-0.25519	-0.531644	-0.355561	-0.253391	-0.529845	-0.353762			O15484	Calpain-5 OS=Homo sapiens GN=CAPN5 PE=1 SV=2
-0.186618	-0.0638941	-0.0714638	-0.0726373	0.113215	0.0128722	0.034688	0.22054	0.120197	-0.126988	-0.0706173	-0.103792	-0.109713	-0.0524543	-0.0578589	-0.00924723	0.0480115	0.0426069	0.0298428	0.0128897	0.0452965	0.0385096	0.0912228	0.102493	0.0091666	0.0618798	0.07315	SNARE interactions in vesicular transport	ko04130	O15498	Synaptobrevin homolog YKT6 OS=Homo sapiens GN=YKT6 PE=1 SV=1
0.0841698	-0.0102452	0.234245	0.059759	0.0550402	0.228704	-0.0429642	-0.047683	0.125981	0.0888738	0.0993015	0.00407236	-0.0931257	-0.133255	-0.340862	-0.157208	-0.197338	-0.404945	-0.0486507	0.33751	-0.201069	-0.311266	0.0125229	-0.300869	-0.340529	-0.0167405	-0.330132	RNA transport	ko03013	O15504	Nucleoporin-like protein 2 OS=Homo sapiens GN=NUPL2 PE=1 SV=1
-0.388982	-0.37075	-0.343997	-0.785661	-0.586	-0.605807	-0.417751	-0.21809	-0.237897	-0.159431	-0.11974	0.105344	-1.11834	-1.25981	-0.942183	-1.0604	-1.20187	-0.884241	-0.304575	-0.396389	-0.285794	-1.24372	-1.24632	-1.2818	-0.914801	-0.917401	-0.952881	Bacterial invasion of epithelial cells;Fc gamma R-mediated phagocytosis;Pathogenic Escherichia coli infection;Regulation of actin cytoskeleton;Shigellosis	ko04666;ko04810;ko05100;ko05130;ko05131	O15511	Actin-related protein 2/3 complex subunit 5 OS=Homo sapiens GN=ARPC5 PE=1 SV=3
0.100015	-0.154725	0.157851	0.0124632	0.12682	0.314753	-0.0219171	0.0924397	0.280373	-0.15068	-0.253132	-0.102226	-0.238221	-0.135385	-0.0753445	-0.0695417	0.0332943	0.0933348	0.00240505	0.00359275	-0.146365	-0.00354315	-0.282833	-0.242157	0.0432459	-0.236044	-0.195368	Huntington's disease;Purine metabolism;Pyrimidine metabolism;RNA polymerase	ko00230;ko00240;ko03020;ko05016	O15514	DNA-directed RNA polymerase II subunit RPB4 OS=Homo sapiens GN=POLR2D PE=1 SV=1
0.0532859	0.0368229	-0.012771	0.45251	0.18244	0.399055	0.426731	0.156661	0.373276	0.00680125	0.045663	-0.0020159	0.722914	0.493047	0.566061	0.706098	0.476231	0.549245	0.0407441	0.0690161	0.18662	0.55162	0.443827	0.472624	0.452827	0.345034	0.373831	RIG-I-like receptor signaling pathway	ko04622	O15523	ATP-dependent RNA helicase DDX3Y OS=Homo sapiens GN=DDX3Y PE=1 SV=2
-0.134283	-0.0669904	-0.00557978	-0.0714602	0.0949503	0.03368	-0.00250914	0.163901	0.102631	-0.142316	-0.141336	-0.273331	-0.202739	0.0328421	-0.108326	-0.017078	0.218503	0.077335	-0.000803368	-0.0635578	0.00423808	0.116762	-0.0869913	0.0441258	0.136803	-0.0669503	0.0641668	Aldosterone-regulated sodium reabsorption;Endometrial cancer;Focal adhesion;Insulin signaling pathway;mTOR signaling pathway;Non-small cell lung cancer;PPAR signaling pathway;Prostate cancer	ko03320;ko04150;ko04510;ko04910;ko04960;ko05213;ko05215;ko05223	O15530	3-phosphoinositide-dependent protein kinase 1 OS=Homo sapiens GN=PDPK1 PE=1 SV=1
0.119776	0.0874037	0.18871	0.387808	0.143835	0.135169	0.255845	0.0118718	0.00320577	0.0417232	0.0639096	0.0979794	0.378061	0.23267	0.32156	0.31019	0.164799	0.253689	-0.0921999	0.0668371	0.185572	-0.0532793	-0.114766	0.0363704	-0.106682	-0.168169	-0.0170327			O15541	RING finger protein 113A OS=Homo sapiens GN=RNF113A PE=1 SV=1
0.245198	0.344309	0.262103	0.254732	0.432063	0.234087	-0.029138	0.148193	-0.049783	0.127149	-0.0721149	-0.0678569	0.0634554	0.00815474	-0.0946727	0.0677297	0.012429	-0.0903984	0.0208797	0.23695	-0.0634496	-0.184785	-0.0528247	-0.110705	-0.249578	-0.117618	-0.175498			O15550	Lysine-specific demethylase 6A OS=Homo sapiens GN=KDM6A PE=1 SV=2
0.0171341	0.106613	-0.0105545	-0.0101015	-0.17172	-0.158322	-0.0478324	-0.209451	-0.196053	-0.0730234	-0.093081	-0.0365237	0.00819859	-0.022424	-0.0900098	0.0757413	0.0451187	-0.0224671	-0.0564514	-0.170522	-0.038298	-0.0574923	-0.140719	-0.0391278	0.0309315	-0.0522952	0.049296	Spliceosome	ko03040	O43143	Pre-mRNA-splicing factor ATP-dependent RNA helicase DHX15 OS=Homo sapiens GN=DHX15 PE=1 SV=2
-0.924331	-0.8361	-1.03106	0.0777081	0.171663	0.0397583	1.00821	1.10216	0.970255	-0.812659	-0.862579	-0.902943	0.158082	0.0211026	-0.014751	1.01748	0.880496	0.844643	-1.53684	-1.44808	-1.41056	-1.42099	-1.20957	-1.22044	0.04417	0.25559	0.24472	mRNA surveillance pathway	ko03015	O43148	mRNA cap guanine-N7 methyltransferase OS=Homo sapiens GN=RNMT PE=1 SV=1
0.216866	0.0491832	0.101365	0.26432	0.173713	0.187345	0.141849	0.0512416	0.0648736	0.160008	0.098175	0.0526828	0.328681	0.320432	0.35451	0.225059	0.21681	0.250888	0.129	0.147783	-0.00705651	0.437562	0.323027	0.300063	0.347653	0.233118	0.210154			O43149	Zinc finger ZZ-type and EF-hand domain-containing protein 1 OS=Homo sapiens GN=ZZEF1 PE=1 SV=6
-0.162696	-0.260669	-0.112452	0.0690377	-0.201513	0.0589087	0.247643	-0.0229073	0.237514	0.196858	-0.0320482	0.0291505	-0.0666256	-0.0601283	0.108943	-0.131279	-0.124782	0.0442896	0.151045	0.177389	0.220633	-0.0297793	-0.0500858	0.162941	-0.212802	-0.233108	-0.0200813	Endocytosis;Fc gamma R-mediated phagocytosis	ko04144;ko04666	O43150	Arf-GAP with SH3 domain, ANK repeat and PH domain-containing protein 2 OS=Homo sapiens GN=ASAP2 PE=1 SV=3
0.276806	0.00792891	0.0243202	-0.377082	-0.442882	-0.476811	-0.4801	-0.5459	-0.579829	-0.126569	0.160276	0.0648352	-0.619121	-0.439046	-0.440201	-0.651968	-0.471893	-0.473048	-0.0744021	0.010679	-0.123995	-0.519018	-0.513198	-0.626357	-0.456445	-0.450625	-0.563784			O43156	TELO2-interacting protein 1 homolog OS=Homo sapiens GN=TTI1 PE=1 SV=3
0.194115	0.226197	0.383496	0.0600766	0.0275998	0.227165	-0.207859	-0.240336	-0.040771	0.249278	0.114328	0.0106443	0.118902	-0.162736	-0.216653	-0.0058481	-0.287486	-0.341403	-0.101787	-0.0212154	-0.152448	-0.199623	-0.425127	-0.189767	-0.107806	-0.33331	-0.0979502			O43159	Ribosomal RNA-processing protein 8 OS=Homo sapiens GN=RRP8 PE=1 SV=2
0.232924	-0.0574071	-0.105985	0.134214	-0.0185724	0.153058	0.111037	-0.0417497	0.129881	0.237844	0.382004	0.27589	0.239521	0.386514	0.297045	-0.0590583	0.0879347	-0.00153433	0.171314	0.331264	0.0661808	0.259056	0.428384	0.102846	0.0694697	0.238798	-0.0867403			O43164	E3 ubiquitin-protein ligase Praja-2 OS=Homo sapiens GN=PJA2 PE=1 SV=4
-0.346432	-0.262606	-0.315143	-0.638077	-0.560252	-0.550194	-0.330017	-0.252192	-0.242134	0.183938	0.0243734	-0.303838	-0.84156	-0.521784	-1.11478	-0.809718	-0.489942	-1.08294	-0.0329053	-0.225789	-0.146804	-1.08002	-0.939034	-1.40889	-0.944854	-0.803868	-1.27372			O43166	Signal-induced proliferation-associated 1-like protein 1 OS=Homo sapiens GN=SIPA1L1 PE=1 SV=4
-0.00314248	-0.127096	-0.0493748	0.235748	0.215364	0.275384	0.295619	0.275235	0.335255	-0.0719076	-0.192899	-0.0473396	-0.148432	-0.211412	-0.293098	-0.0443833	-0.107363	-0.189049	-0.212215	-0.113885	-0.236246	-0.0102703	-0.124376	0.122721	0.177178	0.0630727	0.31017			O43169	Cytochrome b5 type B OS=Homo sapiens OX=9606 GN=CYB5B PE=1 SV=3
-0.00314248	-0.127096	-0.0493748	0.235748	0.215364	0.275384	0.295619	0.275235	0.335255	-0.0719076	-0.192899	-0.0473396	-0.148432	-0.211412	-0.293098	-0.0443833	-0.107363	-0.189049	-0.212215	-0.113885	-0.236246	-0.0102703	-0.124376	0.122721	0.177178	0.0630727	0.31017			O43169	Cytochrome b5 type B OS=Homo sapiens GN=CYB5B PE=1 SV=2
0.0933967	0.0276583	0.0721713	-0.149683	-0.139117	-0.0933968	-0.214092	-0.203526	-0.157806	-0.188138	-0.163016	-0.217951	-0.251836	-0.281972	-0.253799	-0.0621343	-0.0922703	-0.0640973	0.0138342	0.0771701	0.128451	-0.117032	-0.0726592	-0.0717354	-0.190184	-0.145811	-0.144887	Spliceosome	ko03040	O43172	U4/U6 small nuclear ribonucleoprotein Prp4 OS=Homo sapiens GN=PRPF4 PE=1 SV=2
0.00964078	-0.0210142	-0.0072879	-0.0581874	-0.0363786	-0.0634902	-0.051967	-0.0301582	-0.0572698	0.0833138	0.173276	0.137341	0.018283	0.0862047	0.0291918	-0.113027	-0.0451056	-0.102118	0.225233	0.198994	0.193108	-0.0385308	0.0561823	-0.0395844	-0.244309	-0.149596	-0.245363	Glycine, serine and threonine metabolism;Methane metabolism	ko00260;ko00680	O43175	D-3-phosphoglycerate dehydrogenase OS=Homo sapiens GN=PHGDH PE=1 SV=4
0.025298	-0.0739091	0.0306806	0.0123162	-0.0442919	-0.0485561	0.018293	-0.0383151	-0.0425793	0.0689991	0.152324	0.346494	-0.0398363	-0.124341	0.12243	-0.229109	-0.313613	-0.0668424	-0.0422964	-0.0928778	-0.0683694	0.329316	0.148561	0.219216	0.397164	0.216409	0.287064	Alzheimer's disease;Huntington's disease;Oxidative phosphorylation;Parkinson's disease	ko00190;ko05010;ko05012;ko05016	O43181	NADH dehydrogenase [ubiquinone] iron-sulfur protein 4, mitochondrial OS=Homo sapiens GN=NDUFS4 PE=1 SV=1
0.422791	0.341918	0.280643	0.0873263	0.0538893	0.122933	-0.261124	-0.294561	-0.225518	0.447819	0.372014	0.468196	0.369861	0.393849	0.453501	-0.059482	-0.035494	0.024158	0.327469	0.375652	0.432635	0.155411	0.299721	0.329821	-0.223174	-0.0788643	-0.0487643			O43182	Rho GTPase-activating protein 6 OS=Homo sapiens GN=ARHGAP6 PE=1 SV=3
-0.0411179	-0.0570811	-0.0200505	0.108498	0.0159869	0.0510368	0.147915	0.0554034	0.0904533	0.10314	0.106584	0.189535	0.194287	0.243361	0.268236	0.0612007	0.110275	0.13515	0.0975356	0.140222	0.127159	0.225529	0.167073	0.26309	0.10389	0.0454341	0.141451	Phagosome;Vasopressin-regulated water reabsorption	ko04145;ko04962	O43237	Cytoplasmic dynein 1 light intermediate chain 2 OS=Homo sapiens GN=DYNC1LI2 PE=1 SV=1
-0.0352669	0.106461	-0.0421994	-0.0306088	0.0557411	-0.0438197	-0.0402737	0.0460762	-0.0534846	0.156926	0.0619238	0.114454	0.222399	0.17034	0.122703	0.111298	0.0592387	0.0116017	0.107453	-0.133625	-0.0198757	0.123526	-0.19622	0.205803	0.138875	-0.180871	0.221152	Proteasome	ko03050	O43242	26S proteasome non-ATPase regulatory subunit 3 OS=Homo sapiens GN=PSMD3 PE=1 SV=2
-0.268707	1.05889	0.774344	-0.00364377	0.585264	0.379875	-0.525153	0.063755	-0.141634	-0.282015	-0.173425	0.0150086	-0.676867	-0.54762	-0.211276	-0.530057	-0.40081	-0.0644655	0.187075	0.322297	0.169494	-0.0710799	-0.255715	-0.274541	-0.297369	-0.482004	-0.50083			O43251	RNA binding protein fox-1 homolog 2 OS=Homo sapiens GN=RBFOX2 PE=1 SV=3
0.0520339	0.00297703	0.0443409	0.144157	-0.00930557	-0.0858379	0.11104	-0.0424228	-0.118955	-0.177482	-0.10119	-0.159509	-0.0434661	0.0781488	0.0650026	0.102594	0.224209	0.211063	-0.15159	-0.152607	-0.242952	0.0275551	0.144319	0.0155565	0.209938	0.326702	0.197939	Purine metabolism;Selenocompound metabolism;Sulfur metabolism	ko00230;ko00450;ko00920	O43252	Bifunctional 3'-phosphoadenosine 5'-phosphosulfate synthase 1 OS=Homo sapiens GN=PAPSS1 PE=1 SV=2
-0.196966	-0.11627	-0.180295	-0.033086	0.00530213	-0.0453969	0.131424	0.169812	0.119113	0.0114558	-0.0834534	-0.0574205	-0.0373575	-0.214765	-0.202294	0.00578187	-0.171626	-0.159155	-0.062639	-0.195369	-0.0328359	-0.0358531	-0.0964563	-0.0515778	0.0610949	0.000491667	0.0453702			O43264	Centromere/kinetochore protein zw10 homolog OS=Homo sapiens GN=ZW10 PE=1 SV=3
-0.075082	-0.0285211	-0.083378	0.171282	0.15341	0.103974	0.233609	0.215737	0.166301	0.206992	0.0393431	0.0443666	0.16813	0.164467	0.181871	0.0712294	0.0675664	0.0849704	0.134412	0.203474	0.162191	0.172928	0.283972	0.155603	0.00623567	0.11728	-0.0110893			O43278	Kunitz-type protease inhibitor 1 OS=Homo sapiens GN=SPINT1 PE=1 SV=2
0.259083	0.115276	0.229609	-0.0585688	-0.278544	0.0433147	-0.259891	-0.479867	-0.158008	0.244111	0.0331283	0.35541	0.0590331	-0.285827	0.150599	-0.15185	-0.49671	-0.0602841	-0.0255783	0.0601802	0.0669263	-0.127006	-0.0931653	0.0271089	-0.160849	-0.127008	-0.00673383			O43281	Embryonal Fyn-associated substrate OS=Homo sapiens GN=EFS PE=1 SV=1
-0.174543	-0.034362	-0.17337	-0.108773	-0.00508832	-0.151527	0.018652	0.122337	-0.024102	-0.14966	-0.207285	-0.09765	-0.22561	-0.251909	0.0508435	-0.0740783	-0.100377	0.202375	-0.135914	-0.0538503	-0.0571355	-0.224772	-0.108782	-0.151101	-0.142472	-0.0264821	-0.0688011	Spliceosome	ko03040	O43290	U4/U6.U5 tri-snRNP-associated protein 1 OS=Homo sapiens GN=SART1 PE=1 SV=1
0.0617034	-0.114146	0.0275556	-0.0286303	-0.149955	0.0925324	-0.0203346	-0.141659	0.100828	-0.033815	-0.0346552	0.0106769	0.1932	0.0136755	0.149562	0.212464	0.0329399	0.168826	0.0749164	-0.268884	0.266285	0.260055	0.11945	0.247914	0.235949	0.0953442	0.223808			O43291	Kunitz-type protease inhibitor 2 OS=Homo sapiens GN=SPINT2 PE=1 SV=2
-0.0469303	-0.0185774	-0.165665	0.23877	0.440408	0.182468	0.315828	0.517466	0.259526	0.305381	0.498621	0.168039	0.16003	0.392473	0.0330843	-0.163984	0.0684593	-0.290929	-0.0228854	-0.00704487	0.0121496	-0.0868193	0.114063	0.237569	-0.0808924	0.11999	0.243496	Glycosylphosphatidylinositol(GPI)-anchor biosynthesis	ko00563	O43292	Glycosylphosphatidylinositol anchor attachment 1 protein OS=Homo sapiens GN=GPAA1 PE=1 SV=3
-0.300007	-0.109235	0.34336	0.313476	0.21714	0.334214	0.335437	0.239101	0.356175	-0.0109515	0.504084	0.198954	-0.361554	-0.01349	-0.208959	-0.592249	-0.244185	-0.439654	0.0940657	0.116819	-0.0085582	-0.165452	0.0345614	-0.207272	-0.232894	-0.0328808	-0.274714			O43296	Zinc finger protein 264 OS=Homo sapiens GN=ZNF264 PE=1 SV=1
-0.261855	0.027428	0.395835	-0.448438	0.083455	0.481596	-0.502241	0.0296523	0.427793	0.716612	0.199176	0.121462	0.716828	0.47353	-0.388428	0.371078	0.12778	-0.734178	-0.838504	0.220783	-0.0319333	0.120599	0.528196	0.0909214	0.33715	0.744747	0.307473			O43299	AP-5 complex subunit zeta-1 OS=Homo sapiens GN=AP5Z1 PE=1 SV=2
-0.352949	-0.218435	0.0410597	-0.647581	-1.12259	-0.73373	-0.470806	-0.945815	-0.556955	-0.366793	-0.0253839	-0.262817	-0.553522	-0.044073	-0.262005	-0.335191	0.174258	-0.0436737	-0.0662473	-0.127256	-0.04284	0.210873	-0.215929	0.277049	0.289654	-0.137148	0.35583			O43301	Heat shock 70 kDa protein 12A OS=Homo sapiens GN=HSPA12A PE=1 SV=2
-0.10746	0.00190504	-0.140013	0.0516815	0.0581596	-0.0867347	0.133537	0.140016	-0.00487871	-0.0693286	0.0547653	0.0497006	0.08072	0.104135	0.0167422	0.0690076	0.0924226	0.00502977	0.0976629	0.160955	0.242513	0.415031	0.176995	0.3249	0.247987	0.00995137	0.157856			O43314	Inositol hexakisphosphate and diphosphoinositol-pentakisphosphate kinase 2 OS=Homo sapiens GN=PPIP5K2 PE=1 SV=3
0.386407	0.367642	0.519972	-0.0896789	0.205135	0.0582304	-0.514353	-0.219539	-0.366443	0.0245336	-0.0121146	0.122651	0.143927	0.104226	0.0783238	0.0989037	0.0592027	0.0333005	-0.111861	0.0074077	0.0650706	-0.0452616	0.0572788	-0.113989	-0.032134	0.0704064	-0.100861	Adherens junction;Leishmaniasis;MAPK signaling pathway;Measles;NOD-like receptor signaling pathway;Osteoclast differentiation;RIG-I-like receptor signaling pathway;T cell receptor signaling pathway;Toll-like receptor signaling pathway;Toxoplasmosis;Wnt signaling pathway	ko04010;ko04310;ko04380;ko04520;ko04620;ko04621;ko04622;ko04660;ko05140;ko05145;ko05162	O43318	Mitogen-activated protein kinase kinase kinase 7 OS=Homo sapiens GN=MAP3K7 PE=1 SV=1
0.110075	-0.0392059	-0.0915919	0.0407828	-0.105334	-0.0239706	0.0476904	-0.0984264	-0.017063	-0.0800712	-0.199986	-0.242221	-0.0229853	-0.0174461	0.0463646	0.151107	0.156647	0.220457	0.0412521	-0.0681826	0.0421252	0.0685914	-0.0447826	0.114291	0.0635265	-0.0498475	0.109226			O43324	Eukaryotic translation elongation factor 1 epsilon-1 OS=Homo sapiens GN=EEF1E1 PE=1 SV=1
-0.202471	-0.29947	-0.300087	0.0536116	-0.0752	0.0472502	0.320954	0.192143	0.314593	-0.21672	-0.219477	-0.0883321	-0.19296	-0.228655	-0.102764	-0.018117	-0.053812	0.072079	-0.162278	-0.185158	-0.0377302	-0.0395964	0.0932245	0.217987	0.0887923	0.221613	0.346376			O43325	LYR motif-containing protein 1 OS=Homo sapiens GN=LYRM1 PE=2 SV=1
0.155513	0.192991	0.0933226	-0.810236	-0.606762	-0.800079	-0.957512	-0.754038	-0.947355	0.0622538	0.258842	0.213418	-0.743387	-0.89766	-1.07761	-0.921558	-1.07583	-1.25578	-0.0440514	-0.0298896	-0.0196241	-1.15303	-1.28155	-1.17713	-1.12184	-1.25036	-1.14594	ko05152;Neurotrophin signaling pathway;NOD-like receptor signaling pathway;Shigellosis	ko04621;ko04722;ko05131;ko05152	O43353	Receptor-interacting serine/threonine-protein kinase 2 OS=Homo sapiens GN=RIPK2 PE=1 SV=2
-0.359754	-0.0252464	-0.46798	-0.475493	-0.193575	-0.352918	-0.191166	0.0907518	-0.0685912	-0.557699	0.115941	-0.461175	-1.0563	-0.0499925	-0.866493	-0.755322	0.250985	-0.565515	0.423108	-0.06316	0.00638888	-0.0056136	-0.0787059	-0.241663	-0.127726	-0.200818	-0.363775			O43379	WD repeat-containing protein 62 OS=Homo sapiens GN=WDR62 PE=1 SV=4
-0.112205	0.0919029	-0.00456376	-0.298141	-0.177859	-0.270716	-0.289852	-0.16957	-0.262427	-0.169712	-0.0619926	-0.00115054	-0.158357	-0.121254	-0.0456358	-0.0807386	-0.0436356	0.0319826	-0.00871517	0.0485244	-0.0138657	-0.118238	-0.11528	-0.0213572	-0.126886	-0.123928	-0.030005			O43390	Heterogeneous nuclear ribonucleoprotein R OS=Homo sapiens GN=HNRNPR PE=1 SV=1
-0.100085	0.0522265	-0.046694	-0.519906	-0.47343	-0.605403	-0.488389	-0.441913	-0.573886	-0.152751	-0.0782553	-0.126273	-0.311147	-0.322658	-0.28074	-0.192054	-0.203565	-0.161647	-0.139906	-0.173069	-0.0562731	-0.331774	-0.278453	-0.240309	-0.208691	-0.15537	-0.117226	Spliceosome	ko03040	O43395	U4/U6 small nuclear ribonucleoprotein Prp3 OS=Homo sapiens GN=PRPF3 PE=1 SV=2
0.0768493	0.0863024	-0.0362707	0.288801	0.227755	0.163562	0.246507	0.185461	0.121268	0.0675798	0.0708856	0.0790976	0.292095	0.271292	0.15547	0.219574	0.198771	0.082949	-0.000756829	-0.0221838	0.0541056	0.241468	0.224374	0.28182	0.23108	0.213986	0.271432			O43396	Thioredoxin-like protein 1 OS=Homo sapiens GN=TXNL1 PE=1 SV=3
0.047526	0.0328008	-0.0461749	-0.135007	-0.119965	-0.328241	-0.146391	-0.131349	-0.339625	-0.0831167	-0.133002	-0.0460601	-0.227216	-0.284202	-0.189454	-0.139823	-0.196809	-0.102061	-0.148487	-0.131817	0.0530469	-0.33027	-0.270466	-0.0605897	-0.254518	-0.194714	0.0151627			O43399	Tumor protein D54 OS=Homo sapiens GN=TPD52L2 PE=1 SV=2
0.129912	0.00475565	-0.27715	0.173148	0.12654	0.14943	0.220642	0.174034	0.196924	0.134718	0.210793	0.22697	-0.0526273	-0.0238536	0.09486	-0.243454	-0.214681	-0.095967	0.185091	0.0754795	0.0357392	0.127709	-0.130902	0.111323	0.0289391	-0.229672	0.0125531			O43402	ER membrane protein complex subunit 8 OS=Homo sapiens GN=EMC8 PE=1 SV=1
-0.13486	-0.0245964	0.0362749	-0.266784	-0.0369538	0.0783172	-0.225724	0.0041067	0.119378	-0.0252324	0.0882025	0.108669	0.162144	0.100216	0.226857	0.104931	0.043003	0.169644	-0.0464181	-0.0675755	-0.087507	0.124573	-0.110894	-0.0771038	0.19174	-0.0437271	-0.00993693			O43414	ERI1 exoribonuclease 3 OS=Homo sapiens GN=ERI3 PE=1 SV=2
-0.0580302	-0.00460061	-0.0512784	0.13529	0.387876	0.265707	0.17326	0.425846	0.303677	-0.323582	-0.173923	-0.28823	-1.94462	-1.65325	-1.66727	-1.68271	-1.39134	-1.40536	0.023444	-0.0723334	-0.188344	-0.908635	-1.36373	-1.70827	-0.829557	-1.28465	-1.62919			O43422	52 kDa repressor of the inhibitor of the protein kinase OS=Homo sapiens GN=THAP12 PE=1 SV=2
0.152247	-0.031426	-0.176719	-0.625301	-0.718369	-0.922769	-0.606668	-0.699736	-0.904136	-0.130057	-0.161326	0.388361	-0.733359	-0.846344	-0.524384	-0.765685	-0.87867	-0.55671	-0.0144865	-0.03262	0.10842	-0.544748	-0.594693	-0.809913	-0.565186	-0.615131	-0.830351	Inositol phosphate metabolism;Phosphatidylinositol signaling system	ko00562;ko04070	O43426	Synaptojanin-1 OS=Homo sapiens GN=SYNJ1 PE=1 SV=2
0.0425817	0.162753	-0.173585	0.111475	0.15862	-0.123887	0.100892	0.148037	-0.13447	-0.0429814	-0.0312958	-0.395091	-0.145067	-0.153444	-0.017297	0.0113891	0.00301207	0.139159	-0.110421	-0.159487	-0.103675	-0.315654	-0.509205	-0.392641	-0.191126	-0.384677	-0.268113			O43427	Acidic fibroblast growth factor intracellular-binding protein OS=Homo sapiens GN=FIBP PE=1 SV=3
0.0700898	0.0652082	0.161742	0.145403	0.183084	0.292037	0.0463897	0.0840707	0.193024	0.109263	0.11828	0.112527	0.337676	0.30478	0.292014	0.224319	0.191423	0.178657	0.0662182	0.0261393	0.0454066	0.371906	0.330905	0.309204	0.325985	0.284984	0.263283	RNA transport;Viral myocarditis	ko03013;ko05416	O43432	Eukaryotic translation initiation factor 4 gamma 3 OS=Homo sapiens GN=EIF4G3 PE=1 SV=2
0.404703	0.274473	-0.299985	-0.282774	-0.0716673	-0.537223	-0.409171	-0.198064	-0.66362	-0.220016	0.253468	0.559871	-0.5294	-0.00418237	0.264768	-0.727174	-0.201957	0.0669937	0.162607	-0.34228	0.0881212	-0.287423	-0.115855	-0.0536456	-0.256906	-0.0853377	-0.0231283			O43439	Protein CBFA2T2 OS=Homo sapiens GN=CBFA2T2 PE=1 SV=1
-0.089164	-0.270276	-0.113017	-0.353819	-0.330775	-0.246445	-0.196333	-0.173289	-0.0889593	-0.137548	-0.227707	-0.00159872	-0.294525	-0.471013	-0.181973	-0.17224	-0.348728	-0.0596884	0.0144565	0.0825138	0.252375	-0.125768	-0.312232	-0.095309	-0.242216	-0.42868	-0.211757	Spliceosome	ko03040	O43447	Peptidyl-prolyl cis-trans isomerase H OS=Homo sapiens GN=PPIH PE=1 SV=1
-0.222597	-0.308534	-0.531513	1.26182	1.0123	0.757187	1.61603	1.36651	1.1114	0.318622	0.0802762	0.198473	0.328187	0.355169	0.116709	0.129063	0.156045	-0.0824147	0.25243	0.135075	0.0102306	0.247675	0.119442	0.280281	0.115096	-0.0131365	0.147702	Parkinson's disease	ko05012	O43464	Serine protease HTRA2, mitochondrial OS=Homo sapiens GN=HTRA2 PE=1 SV=2
0.0702541	-0.0517578	0.140893	-0.0732639	0.000963863	-0.0285294	-0.126394	-0.0521659	-0.0816592	0.176684	-0.00818233	0.115473	0.265762	0.0127263	0.175649	0.171104	-0.0819319	0.0809908	0.0627849	-0.101814	0.0336227	0.0939663	0.161415	0.068009	0.0957684	0.163217	0.0698111			O43488	Aflatoxin B1 aldehyde reductase member 2 OS=Homo sapiens GN=AKR7A2 PE=1 SV=3
0.172284	-0.180621	-0.12683	0.40146	0.300072	0.413106	0.446516	0.345128	0.458162	0.210273	0.0298062	0.237638	0.26341	0.389464	0.227901	0.104171	0.230225	0.0686619	-0.016031	0.0567447	0.0173692	0.105454	0.53808	0.16852	0.086093	0.518719	0.149159	Tight junction	ko04530	O43491	Band 4.1-like protein 2 OS=Homo sapiens GN=EPB41L2 PE=1 SV=1
0.134709	-0.501677	-0.0482255	-0.155234	-0.215014	-0.0558459	-0.0168362	-0.0766162	0.0825519	-0.0566769	0.296399	0.384295	0.362445	0.216857	0.638003	0.154439	0.0088513	0.429997	0.341139	0.0976219	0.249592	0.611087	0.152979	0.364466	0.381636	-0.076472	0.135015			O43493	Trans-Golgi network integral membrane protein 2 OS=Homo sapiens OX=9606 GN=TGOLN2 PE=1 SV=3
0.134709	-0.501677	-0.0482255	-0.155234	-0.215014	-0.0558459	-0.0168362	-0.0766162	0.0825519	-0.0566769	0.296399	0.384295	0.362445	0.216857	0.638003	0.154439	0.0088513	0.429997	0.341139	0.0976219	0.249592	0.611087	0.152979	0.364466	0.381636	-0.076472	0.135015			O43493	Trans-Golgi network integral membrane protein 2 OS=Homo sapiens GN=TGOLN2 PE=1 SV=2
-0.301733	0.00231295	-0.276865	-0.448376	-0.307204	-0.592284	-0.256281	-0.115109	-0.400189	-0.433906	-0.269626	-0.189698	-1.02647	-0.801659	-1.10464	-0.728727	-0.503916	-0.806897	-0.0807831	-0.293681	-0.410829	-1.22041	-0.993858	-0.702265	-0.958646	-0.732094	-0.440501	Homologous recombination	ko03440	O43502	DNA repair protein RAD51 homolog 3 OS=Homo sapiens GN=RAD51C PE=1 SV=1
-0.0238565	-0.117505	0.174162	0.147635	0.0111727	0.201579	0.136701	0.0002392	0.190645	0.208618	0.236506	0.359748	0.314832	0.149912	0.278777	0.0465413	-0.118379	0.0104863	0.213498	0.0392945	0.0900811	0.307674	0.412331	0.305774	0.193383	0.29804	0.191483			O43504	Ragulator complex protein LAMTOR5 OS=Homo sapiens GN=LAMTOR5 PE=1 SV=1
-0.703944	-0.301756	-0.624692	-0.290028	-0.505831	-0.291147	0.253436	0.037633	0.252317	-0.569814	0.0551149	-0.478834	-0.161576	0.593364	0.00391238	0.169602	0.924542	0.33509	0.158696	0.243497	0.0980058	0.012206	0.496236	0.389392	-0.154527	0.329503	0.222659	Glycosaminoglycan biosynthesis - keratan sulfate;Glycosphingolipid biosynthesis - lacto and neolacto series	ko00533;ko00601	O43505	Beta-1,4-glucuronyltransferase 1 OS=Homo sapiens GN=B4GAT1 PE=1 SV=1
0.0873894	-0.261517	-0.174218	-0.137606	-0.186102	-0.0733773	-0.0214908	-0.0699868	0.0427379	-0.282076	-0.185768	-0.384933	-0.192701	-0.208936	-0.479852	0.091558	0.075323	-0.195593	0.0337091	-0.421027	-0.196245	-0.54313	-0.571531	-0.430136	-0.348609	-0.37701	-0.235615			O43513	Mediator of RNA polymerase II transcription subunit 7 OS=Homo sapiens GN=MED7 PE=1 SV=1
0.19751	0.10934	0.088944	0.290725	0.222282	0.0513243	0.158794	0.0903507	-0.080607	0.00765191	0.224491	0.259373	-0.0257746	0.316211	0.427545	-0.189613	0.152372	0.263706	-0.0820852	-0.139289	-0.14348	0.292937	0.208988	0.00471405	0.414555	0.330606	0.126332	Chemokine signaling pathway;Endometrial cancer;Neurotrophin signaling pathway;Non-small cell lung cancer	ko04062;ko04722;ko05213;ko05223	O43524	Forkhead box protein O3 OS=Homo sapiens GN=FOXO3 PE=1 SV=1
-0.0421422	-0.0844925	0.397938	0.0428521	-0.044931	0.259005	-0.0475823	-0.135365	0.168571	0.197288	-0.196747	0.0586587	0.162676	-0.238423	-0.0359937	0.142943	-0.258156	-0.0557269	-0.140331	-0.0901245	0.15101	0.0983879	0.0742773	0.171452	0.12487	0.100759	0.197934			O43572	A-kinase anchor protein 10, mitochondrial OS=Homo sapiens GN=AKAP10 PE=1 SV=2
-0.225833	-0.0703109	-0.150211	0.0696154	-0.291497	0.526803	0.2184	-0.142712	0.675588	-0.168663	-0.324191	-0.128271	-0.284949	-0.577949	-0.611259	-0.0779073	-0.370907	-0.404217	-0.186884	-0.438432	0.0953439	-0.267503	-0.597994	-0.0500088	-0.0908456	-0.421337	0.126649			O43581	Synaptotagmin-7 OS=Homo sapiens GN=SYT7 PE=1 SV=3
-0.0779163	-0.134863	0.192314	0.338551	-0.0932526	0.0698112	0.345373	-0.0864308	0.076633	0.113749	0.0209269	0.0242003	0.28851	0.242956	0.22855	0.235551	0.189997	0.175591	0.136202	0.199634	-0.00735443	0.406619	0.124637	0.258391	0.297125	0.0151431	0.148897			O43583	Density-regulated protein OS=Homo sapiens GN=DENR PE=1 SV=2
-0.0224834	-0.0214773	0.00594656	-0.0377677	-0.0379281	-0.035134	-0.0250963	-0.0252567	-0.0224626	-0.0919678	-0.0661343	-0.0798706	-0.00530367	0.0379029	0.0606696	0.0740206	0.117227	0.139994	-0.0236544	0.017137	0.0232495	-0.106226	-0.16681	-0.0975786	-0.111803	-0.172387	-0.103156	RNA transport	ko03013	O43592	Exportin-T OS=Homo sapiens GN=XPOT PE=1 SV=2
-0.0114336	0.453498	0.176096	0.201499	0.426405	0.3237	-0.00455447	0.220352	0.117647	0.00488172	0.519581	0.258713	0.206412	0.655998	0.184225	-0.0546466	0.394939	-0.0768336	0.500161	0.324009	0.397176	0.625454	0.513789	0.49222	0.218339	0.106674	0.0851047			O43598	2'-deoxynucleoside 5'-phosphate N-hydrolase 1 OS=Homo sapiens GN=DNPH1 PE=1 SV=1
0.322585	0.0665595	0.103803	0.45183	0.131484	0.199091	0.287514	-0.0328318	0.0347752	0.0394155	0.111042	0.220021	0.0202933	0.0588903	0.103882	-0.1032	-0.0646025	-0.0196108	-0.153999	-0.184178	-0.103899	0.0190459	0.0209116	0.0914655	0.166405	0.16827	0.238824			O43615	Mitochondrial import inner membrane translocase subunit TIM44 OS=Homo sapiens GN=TIMM44 PE=1 SV=2
-0.142925	-0.199385	-0.146084	-0.343822	-0.391577	-0.118582	-0.181024	-0.228779	0.044216	-0.215628	-0.0697391	-0.206273	-0.185078	-0.083037	-0.139017	-0.021198	0.080843	0.024863	0.144603	-0.0925461	0.0207455	0.111646	-0.109068	-0.0177811	0.0873785	-0.133335	-0.0420486			O43617	Trafficking protein particle complex subunit 3 OS=Homo sapiens GN=TRAPPC3 PE=1 SV=1
0.15519	0.218499	0.21435	-0.247878	-0.217439	-0.291618	-0.443891	-0.413452	-0.487631	0.206295	0.0907984	0.176117	0.198653	0.0128216	0.136539	0.0409162	-0.144915	-0.0211978	0.102776	-0.0415863	0.0338394	0.0693108	-0.0885073	-0.146164	0.0376344	-0.120184	-0.17784	Endocytosis	ko04144	O43633	Charged multivesicular body protein 2a OS=Homo sapiens GN=CHMP2A PE=1 SV=1
0.0942277	-0.0933527	0.0807017	0.00822248	-0.230179	-0.122104	-0.0189698	-0.257371	-0.149296	0.124566	-0.131693	0.0647344	-0.0769898	-0.348858	-0.0321085	-0.0961923	-0.36806	-0.051311	0.0122965	0.0454484	-0.00544004	-0.32694	-0.222551	-0.369435	-0.344375	-0.239986	-0.38687	ErbB signaling pathway;Pathogenic Escherichia coli infection;T cell receptor signaling pathway	ko04012;ko04660;ko05130	O43639	Cytoplasmic protein NCK2 OS=Homo sapiens GN=NCK2 PE=1 SV=2
-0.0279455	-0.306403	-0.458619	0.0536179	0.496624	0.154698	0.31794	0.760946	0.419021	-0.0195041	0.0946584	0.0911616	-0.180905	-0.122429	-0.32275	-0.236344	-0.177868	-0.378189	-0.196455	0.116239	0.238498	-0.186943	0.279837	-0.0714574	-0.239704	0.227076	-0.124218			O43657	Tetraspanin-6 OS=Homo sapiens GN=TSPAN6 PE=1 SV=1
0.123387	0.0149715	0.014144	-0.0409147	-0.193135	-0.277332	-0.0917489	-0.243969	-0.328166	-0.0334252	0.0194162	-0.0267303	-0.167056	0.00940004	-0.194267	-0.153476	0.0229798	-0.180687	0.00245977	0.0998652	-0.0866628	-0.0677447	-0.0606614	-0.15258	-0.0729654	-0.0658821	-0.157801	Spliceosome	ko03040	O43660	Pleiotropic regulator 1 OS=Homo sapiens GN=PLRG1 PE=1 SV=1
-0.243467	-0.283832	-0.151151	-0.961759	-0.968692	-0.758569	-0.735609	-0.742542	-0.532419	-0.256592	-0.225743	-0.212575	-2.0251	-2.08793	-2.12139	-1.79346	-1.85629	-1.88975	-0.0626955	0.0103516	-0.0229474	-0.843793	-0.922864	-0.748681	-0.818696	-0.897767	-0.723584			O43663	Protein regulator of cytokinesis 1 OS=Homo sapiens GN=PRC1 PE=1 SV=2
0.0531411	-0.256601	-0.101347	-0.0759069	-0.180882	0.0216374	0.0256954	-0.0792797	0.12324	0.156711	0.0571005	0.199738	-0.104531	-0.139147	-0.043973	-0.242381	-0.276997	-0.181823	-0.0181957	-0.218093	-0.324833	-0.104405	-0.414593	-0.542336	0.0826356	-0.227552	-0.355295			O43665	Regulator of G-protein signaling 10 OS=Homo sapiens OX=9606 GN=RGS10 PE=1 SV=3
0.0531411	-0.256601	-0.101347	-0.0759069	-0.180882	0.0216374	0.0256954	-0.0792797	0.12324	0.156711	0.0571005	0.199738	-0.104531	-0.139147	-0.043973	-0.242381	-0.276997	-0.181823	-0.0181957	-0.218093	-0.324833	-0.104405	-0.414593	-0.542336	0.0826356	-0.227552	-0.355295			O43665	Regulator of G-protein signaling 10 OS=Homo sapiens GN=RGS10 PE=1 SV=2
-0.0919536	-0.0262099	-0.116872	-0.200333	0.110758	-0.0725137	-0.121988	0.189103	0.00583147	-0.258976	0.00307709	-0.0755766	-0.110638	0.273081	-0.0871314	-0.000146163	0.383573	0.0233604	-0.144924	-0.0350041	-0.2368	-0.17565	-0.0962087	-0.257271	-0.0367406	0.0427007	-0.118362			O43670	BUB3-interacting and GLEBS motif-containing protein ZNF207 OS=Homo sapiens GN=ZNF207 PE=1 SV=1
0.0912484	-0.0513115	-0.0910701	0.797768	0.588267	-0.00335083	0.814812	0.605311	0.0136936	0.0447317	-0.0990062	-0.1172	-0.170873	-0.0961701	-0.104304	-0.113715	-0.0390119	-0.0471458	-0.407297	-0.0861208	-0.108859	-0.337142	0.0681351	-0.251631	-0.136383	0.268894	-0.0508721	Alzheimer's disease;Huntington's disease;Oxidative phosphorylation;Parkinson's disease	ko00190;ko05010;ko05012;ko05016	O43674	NADH dehydrogenase [ubiquinone] 1 beta subcomplex subunit 5, mitochondrial OS=Homo sapiens GN=NDUFB5 PE=1 SV=1
0.0562297	0.309766	0.0436017	0.0690371	0.113661	0.0305209	-0.0674954	-0.0228715	-0.106012	0.118565	0.109087	0.133434	-0.114851	-0.0309831	0.0918559	-0.235213	-0.151345	-0.0285061	0.327788	0.384652	0.388286	0.271843	0.0684167	0.349591	-0.0950657	-0.298492	-0.0173177	Alzheimer's disease;Huntington's disease;Oxidative phosphorylation;Parkinson's disease	ko00190;ko05010;ko05012;ko05016	O43676	NADH dehydrogenase [ubiquinone] 1 beta subcomplex subunit 3 OS=Homo sapiens GN=NDUFB3 PE=1 SV=3
0.0460453	0.0418318	0.195156	0.392593	0.274241	0.412312	0.298249	0.179897	0.317968	0.356188	0.370904	0.308632	0.308479	0.162197	0.1494	-0.0367623	-0.183044	-0.195841	0.252685	0.243842	0.0250727	0.368914	0.401462	0.371386	0.195047	0.227595	0.197519	Alzheimer's disease;Huntington's disease;Oxidative phosphorylation;Parkinson's disease	ko00190;ko05010;ko05012;ko05016	O43678	NADH dehydrogenase [ubiquinone] 1 alpha subcomplex subunit 2 OS=Homo sapiens GN=NDUFA2 PE=1 SV=3
-0.067656	0.171448	-0.0916366	-0.225152	0.0416319	-0.227805	-0.229204	0.0375801	-0.231857	-0.0424211	0.00798307	0.0956245	0.0124237	0.28711	0.191261	-0.00797179	0.266715	0.170866	0.0787941	0.0872273	0.136315	0.0857809	0.274656	0.254754	-0.0149979	0.173877	0.153975			O43681	ATPase ASNA1 OS=Homo sapiens GN=ASNA1 PE=1 SV=2
-0.118435	-0.307489	-0.143224	-0.552962	-0.389186	-0.405631	-0.363246	-0.19947	-0.215915	0.144992	0.166883	0.424469	-0.927024	-0.982245	-0.882836	-1.17247	-1.22769	-1.12828	0.288273	0.0384102	0.189345	-0.144183	-0.374173	-0.518425	-0.316192	-0.546182	-0.690434	Cell cycle;Cell cycle - yeast;Meiosis - yeast;Oocyte meiosis;Progesterone-mediated oocyte maturation	ko04110;ko04111;ko04113;ko04114;ko04914	O43683	Mitotic checkpoint serine/threonine-protein kinase BUB1 OS=Homo sapiens GN=BUB1 PE=1 SV=1
0.0921054	-0.0547942	0.162466	0.148878	-0.0487291	0.103958	0.0822856	-0.115321	0.0373656	0.095835	-0.0509943	-0.0648816	-0.03188	-0.234964	-0.176545	-0.0251997	-0.228284	-0.169865	-0.0407665	0.055337	-0.00691546	-0.0533937	-0.0868105	-0.160509	-0.0559454	-0.0893622	-0.163061	Cell cycle;Cell cycle - yeast	ko04110;ko04111	O43684	Mitotic checkpoint protein BUB3 OS=Homo sapiens GN=BUB3 PE=1 SV=1
-0.669176	-0.484467	-0.527075	-0.474604	-0.27866	-0.267795	0.0856353	0.281579	0.292444	-0.862946	-0.933769	-0.790738	-0.415312	-0.481916	-0.144929	0.447172	0.380568	0.717555	-0.488377	-0.485271	-0.489172	-0.0114981	0.00637003	0.118565	0.476109	0.493977	0.606172	Ether lipid metabolism;Fat digestion and absorption;Fc gamma R-mediated phagocytosis;Glycerolipid metabolism;Glycerophospholipid metabolism;Sphingolipid metabolism	ko00561;ko00564;ko00565;ko00600;ko04666;ko04975	O43688	Phospholipid phosphatase 2 OS=Homo sapiens GN=PLPP2 PE=1 SV=1
0.0243806	-0.0479502	0.0251097	-0.00619273	-0.0216911	-0.00999549	-0.0067061	-0.0222045	-0.0105089	0.0881601	-0.093552	-0.0359753	0.193729	-0.0115263	0.0497607	0.207518	0.00226277	0.0635498	0.157554	0.0762664	0.095547	0.108971	-0.00709548	0.0239993	-0.000818133	-0.116885	-0.0857898	Adherens junction;Amoebiasis;Arrhythmogenic right ventricular cardiomyopathy (ARVC);Focal adhesion;Leukocyte transendothelial migration;Regulation of actin cytoskeleton;Systemic lupus erythematosus;Tight junction	ko04510;ko04520;ko04530;ko04670;ko04810;ko05146;ko05322;ko05412	O43707	Alpha-actinin-4 OS=Homo sapiens GN=ACTN4 PE=1 SV=2
0.2497	0.117364	0.33176	0.211042	0.0132499	0.312028	-0.0218993	-0.219691	0.0790867	0.177285	-0.0852467	0.0685524	-0.0389032	-0.273235	-0.156475	-0.0924334	-0.326765	-0.210005	-0.0948821	-0.0616602	-0.121516	-0.219691	-0.260571	-0.220904	-0.127005	-0.167885	-0.128218	Drug metabolism - cytochrome P450;Glutathione metabolism;Metabolism of xenobiotics by cytochrome P450;Styrene degradation;Tyrosine metabolism	ko00350;ko00480;ko00643;ko00980;ko00982	O43708	Maleylacetoacetate isomerase OS=Homo sapiens GN=GSTZ1 PE=1 SV=3
-0.216863	-0.272964	-0.73026	0.00363737	-0.0454947	-0.229493	0.410333	0.361201	0.177203	0.109129	0.199744	0.066162	0.294774	0.391615	0.214781	0.169762	0.266603	0.0897693	0.0080585	0.336859	-0.0643016	-0.0124133	0.24544	-0.0695502	-0.105952	0.151901	-0.163089	Histidine metabolism;Polycyclic aromatic hydrocarbon degradation;Tyrosine metabolism	ko00340;ko00350;ko00624	O43709	Probable 18S rRNA (guanine-N(7))-methyltransferase OS=Homo sapiens GN=WBSCR22 PE=1 SV=2
0.153369	0.263143	0.154089	0.455162	0.308086	0.222407	0.264962	0.117886	0.0322067	0.180327	0.0668123	0.0355371	0.141747	0.126898	0.0973744	0.0475215	0.0326725	0.00314893	0.15529	0.267584	0.146611	0.13174	0.456648	0.310915	-0.0580883	0.26682	0.121087			O43715	TP53-regulated inhibitor of apoptosis 1 OS=Homo sapiens GN=TRIAP1 PE=1 SV=1
-0.0502189	-0.256814	-0.0336702	0.278597	0.277715	0.345767	0.392165	0.391283	0.459335	0.0645495	0.0339562	-0.141662	0.144348	-0.076465	-0.11865	0.158733	-0.0620796	-0.104265	-0.321817	-0.231224	-0.144326	-0.122013	-0.134385	-0.0976835	0.110443	0.0980707	0.134772			O43716	Glutamyl-tRNA(Gln) amidotransferase subunit C, mitochondrial OS=Homo sapiens GN=GATC PE=1 SV=1
-0.00118411	-0.0901868	-0.0530327	0.0783553	-0.0697521	-0.0171962	0.12649	-0.0216176	0.0309383	-0.0159261	0.0381166	-0.0962689	0.0372963	0.149842	0.0364836	0.0619891	0.174535	0.0611764	0.206175	0.0940994	0.166753	0.195816	0.223068	0.172595	0.0401402	0.0673922	0.0169192			O43719	HIV Tat-specific factor 1 OS=Homo sapiens GN=HTATSF1 PE=1 SV=1
-0.0504183	-0.0889201	0.197705	-0.596199	-0.453638	-0.138659	-0.615655	-0.473094	-0.158115	0.193016	-0.012775	0.100244	-0.534722	-0.912151	-0.637492	-0.628217	-1.00565	-0.730987	0.0215163	0.307026	0.126379	-0.972461	-1.0735	-0.644885	-1.1241	-1.22514	-0.796525	Adipocytokine signaling pathway;Hypertrophic cardiomyopathy (HCM);Insulin signaling pathway	ko04910;ko04920;ko05410	O43741	5'-AMP-activated protein kinase subunit beta-2 OS=Homo sapiens GN=PRKAB2 PE=1 SV=1
-0.0961235	0.0390467	0.0710866	-0.349951	-0.14542	-0.204228	-0.354621	-0.15009	-0.208898	0.122223	0.0582304	0.047685	-0.0365071	-0.0874489	-0.0898406	-0.112553	-0.163495	-0.165887	0.0538589	0.0208504	0.0695932	-0.117696	-0.0515892	-0.02812	-0.165797	-0.09969	-0.0762208	Lysosome	ko04142	O43747	AP-1 complex subunit gamma-1 OS=Homo sapiens GN=AP1G1 PE=1 SV=5
-0.146064	-0.282295	-0.112756	0.0614035	-0.0694723	0.0527013	0.241775	0.110899	0.233073	-0.0944664	0.0671342	0.0233657	-0.128003	0.109105	0.00421918	-0.126681	0.110427	0.00554135	-0.139191	-0.0429278	-0.151823	0.105028	0.0736184	0.160418	0.216342	0.184932	0.271732	SNARE interactions in vesicular transport	ko04130	O43752	Syntaxin-6 OS=Homo sapiens GN=STX6 PE=1 SV=1
-0.138862	-0.372614	-0.1641	-0.109109	-0.0271052	-0.0568056	0.116083	0.198087	0.168386	-0.0889037	-0.201214	-0.262278	0.170848	-0.014769	-0.115951	0.35498	0.169363	0.0681809	-0.0621921	0.0986638	-0.100358	0.22851	0.256894	0.107978	0.249805	0.278189	0.129273			O43760	Synaptogyrin-2 OS=Homo sapiens GN=SYNGR2 PE=1 SV=1
0.0670538	-0.0815741	-0.0976855	0.216727	0.084064	0.0660858	0.254129	0.121466	0.103488	0.0232496	0.0328212	-0.0474551	0.0796531	0.109833	0.213412	0.0767812	0.106961	0.21054	0.0467929	0.102357	0.0516461	0.0804125	0.188022	-0.0546474	0.0134805	0.12109	-0.121579			O43765	Small glutamine-rich tetratricopeptide repeat-containing protein alpha OS=Homo sapiens GN=SGTA PE=1 SV=1
-0.021285	-0.0732001	-0.0641597	0.119421	0.136121	0.306602	0.172303	0.189003	0.359484	0.0753861	-0.0177535	-0.0937549	-0.132472	-0.131139	-0.144988	-0.120431	-0.119098	-0.132947	-0.217069	-0.117899	-0.216408	-0.107005	-0.266227	-0.200398	0.076787	-0.082435	-0.016606			O43768	Alpha-endosulfine OS=Homo sapiens GN=ENSA PE=1 SV=1
-0.241955	0.0904537	-0.0463938	0.197061	0.435653	0.300893	0.263026	0.501618	0.366858	-0.054088	0.0500572	0.0207496	-0.246642	-0.173102	0.0864492	-0.252215	-0.178675	0.0808763	0.00993076	0.0846015	0.117094	0.111459	0.0739055	0.194157	0.0409169	0.00336341	0.123615			O43772	Mitochondrial carnitine/acylcarnitine carrier protein OS=Homo sapiens GN=SLC25A20 PE=1 SV=1
-0.0459999	0.0732231	0.135683	0.0363014	0.0670968	-0.066252	-0.0180007	0.0127947	-0.120554	0.212689	0.0124719	0.0464861	0.154166	0.133788	0.138416	0.063617	0.043239	0.047867	0.0563165	0.124412	-0.0308366	0.0117855	0.0147998	0.0160642	-0.0381785	-0.0351642	-0.0338998	Aminoacyl-tRNA biosynthesis	ko00970	O43776	Asparagine--tRNA ligase, cytoplasmic OS=Homo sapiens GN=NARS PE=1 SV=1
0.272823	0.154231	0.0431388	0.228403	0.26257	0.174329	0.0716721	0.105839	0.0175981	-0.308351	-0.191292	-0.215601	0.439769	0.40582	0.421437	0.678184	0.644235	0.659852	-0.0606759	-0.151432	-0.166849	0.614077	0.500894	0.392911	0.740396	0.627213	0.51923			O43795	Unconventional myosin-Ib OS=Homo sapiens GN=MYO1B PE=1 SV=3
0.0526524	0.00291747	0.143823	-0.0568806	0.0588065	-0.107447	-0.123345	-0.00765779	-0.173911	0.0984512	0.190799	0.176397	-0.125094	-0.109588	-0.183337	-0.28031	-0.264804	-0.338553	0.0570939	0.00293214	0.236085	-0.320987	0.0665676	-0.135586	-0.419691	-0.0321361	-0.23429			O43805	Sjoegren syndrome nuclear autoantigen 1 OS=Homo sapiens GN=SSNA1 PE=1 SV=2
-0.339904	-0.455096	-0.0858144	0.128785	-0.0551396	0.224617	0.42239	0.238465	0.518222	1.22128	-0.517714	-0.816182	1.74854	-0.384739	-0.656199	1.78608	-0.3472	-0.61866	-0.687573	-0.626597	-0.474487	-0.275186	-0.512904	-0.60373	0.321033	0.083315	-0.007511	Peroxisome	ko04146	O43808	Peroxisomal membrane protein PMP34 OS=Homo sapiens GN=SLC25A17 PE=1 SV=1
0.362496	0.301995	0.229856	0.0435862	-0.0418513	0.00293422	-0.254529	-0.339967	-0.295181	0.0059202	-0.0829508	-0.037194	0.0469603	-0.141785	-0.0239845	0.0850352	-0.10371	0.0140904	-0.071934	0.136095	-0.0208755	-0.266396	-0.0603593	-0.109812	-0.280825	-0.0747878	-0.124241	mRNA surveillance pathway	ko03015	O43809	Cleavage and polyadenylation specificity factor subunit 5 OS=Homo sapiens GN=NUDT21 PE=1 SV=1
0.0798923	0.0366911	0.0903983	-0.0765915	-0.0400178	-0.0221221	-0.145585	-0.109012	-0.091116	0.0187504	0.132372	-0.0396626	0.0427165	0.216825	0.12237	0.00556323	0.179672	0.0852167	0.126109	0.0608363	0.0615549	-0.0244124	-0.0812737	0.0699885	-0.107246	-0.164107	-0.0128449			O43813	LanC-like protein 1 OS=Homo sapiens GN=LANCL1 PE=1 SV=1
-0.21437	-0.168919	-0.149437	-0.513699	-0.525654	-0.529869	-0.336124	-0.348079	-0.352294	-0.290181	-0.148738	-0.0793492	-0.77725	-0.589339	-0.637324	-0.604494	-0.416583	-0.464568	-0.0681007	-0.185574	-0.202286	-0.59557	-0.73723	-0.558539	-0.443583	-0.585243	-0.406552			O43815	Striatin OS=Homo sapiens GN=STRN PE=1 SV=4
0.0942962	0.10577	0.0709445	0.236647	0.267171	0.34062	0.14631	0.176834	0.250283	-0.136638	-0.182935	-0.209003	0.217221	0.126079	0.00474274	0.393413	0.302271	0.180935	0.109817	0.0859204	0.0767995	0.233144	0.165244	0.0382498	0.142298	0.0743984	-0.0525958			O43818	U3 small nucleolar RNA-interacting protein 2 OS=Homo sapiens GN=RRP9 PE=1 SV=1
-0.52774	-0.439592	-0.282148	-0.267339	-0.173157	-0.105858	0.149154	0.243336	0.310635	0.106809	-0.0174799	0.134312	-0.325934	-0.0783676	-0.251433	-0.400481	-0.152915	-0.32598	-0.0975736	-0.143722	-0.204234	0.10903	0.11199	0.149705	0.25754	0.2605	0.298215			O43819	Protein SCO2 homolog, mitochondrial OS=Homo sapiens GN=SCO2 PE=1 SV=3
-0.165853	-0.313798	-0.0997934	0.0297916	-0.0603722	0.156676	0.22294	0.132776	0.349824	-0.147954	-0.1923	-0.154401	-0.0782033	-0.0433558	-0.239078	0.0866817	0.121529	-0.074193	-0.123754	-0.175386	-0.124771	0.066954	-0.116852	-0.0458467	0.208258	0.0244517	0.095457			O43823	A-kinase anchor protein 8 OS=Homo sapiens GN=AKAP8 PE=1 SV=1
-0.288932	-0.110043	-0.175332	0.351853	0.308255	-0.0537798	0.543289	0.499691	0.137656	-0.0165689	0.227789	0.17169	-0.0847325	0.0448548	0.162979	-0.212369	-0.0827819	0.0353423	-0.105664	-0.0194289	0.0354591	-0.0639919	-0.00285334	-0.00239283	-0.034114	0.0270246	0.0274851			O43824	Putative GTP-binding protein 6 OS=Homo sapiens OX=9606 GN=GTPBP6 PE=2 SV=4
-0.288932	-0.110043	-0.175332	0.351853	0.308255	-0.0537798	0.543289	0.499691	0.137656	-0.0165689	0.227789	0.17169	-0.0847325	0.0448548	0.162979	-0.212369	-0.0827819	0.0353423	-0.105664	-0.0194289	0.0354591	-0.0639919	-0.00285334	-0.00239283	-0.034114	0.0270246	0.0274851			O43824	Putative GTP-binding protein 6 OS=Homo sapiens GN=GTPBP6 PE=2 SV=3
-0.114625	0.213361	-0.163419	-0.525832	-0.253997	-0.201659	-0.504271	-0.232436	-0.180098	-0.0603941	0.00337437	-0.0160345	0.0699915	0.0666575	-0.0874705	0.0943429	0.0910089	-0.0631191	-0.06312	-0.277105	0.151631	-0.425971	-0.163614	-0.437569	-0.363106	-0.100749	-0.374704			O43829	Zinc finger and BTB domain-containing protein 14 OS=Homo sapiens GN=ZBTB14 PE=1 SV=2
-0.0155219	-0.0759822	-0.0367978	0.041513	0.00333765	0.0897405	0.0842803	0.0461049	0.132508	0.0327993	-0.0190921	-0.0649558	0.0149771	-0.0605479	-0.0118903	0.03206	-0.043465	0.00519257	-0.2262	-0.210779	-0.272995	0.0381584	-0.0140601	0.0244746	0.274816	0.222598	0.261133	Citrate cycle (TCA cycle)	ko00020	O43837	Isocitrate dehydrogenase [NAD] subunit beta, mitochondrial OS=Homo sapiens GN=IDH3B PE=1 SV=2
-0.0539178	-0.106496	-0.148981	0.0696839	-0.0700381	-0.100222	0.172815	0.0330935	0.0029096	-0.0387633	-0.174593	-0.17865	0.17757	0.0418745	0.136107	0.308239	0.172543	0.266776	-0.0342849	-0.00437533	-0.00275698	0.22983	0.257237	0.305157	0.243636	0.271043	0.318963			O43847	Nardilysin OS=Homo sapiens OX=9606 GN=NRDC PE=1 SV=3
-0.0539178	-0.106496	-0.148981	0.0696839	-0.0700381	-0.100222	0.172815	0.0330935	0.0029096	-0.0387633	-0.174593	-0.17865	0.17757	0.0418745	0.136107	0.308239	0.172543	0.266776	-0.0342849	-0.00437533	-0.00275698	0.22983	0.257237	0.305157	0.243636	0.271043	0.318963			O43847	Nardilysin OS=Homo sapiens GN=NRDC PE=1 SV=2
-0.282537	-0.200466	-0.218152	-0.167002	-0.0336475	-0.010501	0.0667163	0.200071	0.223217	-0.241862	-0.0332168	-0.18965	0.00559235	0.229517	0.0224804	0.160502	0.384427	0.17739	-0.24641	-0.236787	-0.271244	-0.0179786	0.0719282	0.00186414	0.233502	0.323409	0.253344			O43852	Calumenin OS=Homo sapiens GN=CALU PE=1 SV=2
-0.358913	-0.195416	-0.141991	0.144422	0.0844562	-0.106151	0.376529	0.316563	0.125956	0.143902	0.253216	0.320607	0.183816	0.177937	0.302243	-0.0554257	-0.0613047	0.0630013	0.0446121	-0.133337	0.131147	0.111723	0.365511	0.261707	0.0975823	0.35137	0.247566			O43861	Probable phospholipid-transporting ATPase IIB OS=Homo sapiens GN=ATP9B PE=2 SV=4
0.0176427	-0.127355	-0.0553353	0.0504471	0.0143189	0.125146	0.105463	0.0693348	0.180162	0.0644541	-0.0487583	-0.0941229	0.080056	0.0637902	0.0324487	0.106198	0.0899326	0.0585911	-0.037452	-0.0252703	-0.0388895	0.0533527	0.0816033	-0.0509756	0.0872233	0.115474	-0.017105	Cysteine and methionine metabolism	ko00270	O43865	Adenosylhomocysteinase 2 OS=Homo sapiens GN=AHCYL1 PE=1 SV=2
-0.0290743	-0.0723291	-0.0366207	-0.0420553	6.6266e-05	0.163337	0.00395273	0.0460743	0.209345	-0.114275	-0.0207045	-0.106454	0.102974	0.0891257	0.0513939	0.183452	0.169604	0.131872	0.172553	0.223566	0.244114	0.372435	0.302926	0.351999	0.159024	0.089515	0.138588			O43896	Kinesin-like protein KIF1C OS=Homo sapiens GN=KIF1C PE=1 SV=3
-0.260077	-0.0970795	-0.196318	0.339011	-0.0965529	-0.319813	0.523502	0.0879386	-0.135322	-0.320069	-0.226365	-0.209317	-0.300856	-0.167561	-0.138045	-0.048939	0.084356	0.113872	-0.192357	-0.0829419	-0.123006	-0.171368	-0.284478	-0.134654	-0.0385997	-0.15171	-0.0018857	Cell cycle;Cell cycle - yeast;Meiosis - yeast	ko04110;ko04111;ko04113	O43913	Origin recognition complex subunit 5 OS=Homo sapiens GN=ORC5 PE=1 SV=1
0.150336	0.0943206	0.0221835	0.222467	0.242188	0.0903082	0.13352	0.153241	0.0013615	0.452552	0.112024	0.232224	0.443508	0.0715892	0.227317	0.177908	-0.194011	-0.038283	0.0518267	0.162805	-0.189992	0.021046	0.197789	-0.0466776	0.0128328	0.189576	-0.0548908	Alzheimer's disease;Huntington's disease;Oxidative phosphorylation;Parkinson's disease	ko00190;ko05010;ko05012;ko05016	O43920	NADH dehydrogenase [ubiquinone] iron-sulfur protein 5 OS=Homo sapiens GN=NDUFS5 PE=1 SV=3
0.235906	0.178494	0.0138215	0.0816719	0.0930892	-0.00523046	-0.0610686	-0.0496513	-0.147971	-0.0746358	-0.0763174	0.159612	-0.13795	-0.282503	-0.0675106	-0.140836	-0.285389	-0.0703969	-0.129497	-0.0469829	-0.247187	-0.353111	-0.269058	-0.397958	-0.211889	-0.127836	-0.256736	Purine metabolism	ko00230	O43924	Retinal rod rhodopsin-sensitive cGMP 3',5'-cyclic phosphodiesterase subunit delta OS=Homo sapiens GN=PDE6D PE=1 SV=1
-0.281635	-0.139875	-0.147445	-0.443792	-0.145332	-0.187574	-0.25414	0.0443197	0.00207767	-0.375884	-0.19234	-0.275516	-0.279871	-0.159543	-0.356189	0.00137567	0.121704	-0.0749423	-0.0572583	-0.0923721	-0.141647	-0.312312	-0.221913	-0.257098	-0.21522	-0.124821	-0.160006	Cell cycle;Cell cycle - yeast;Meiosis - yeast	ko04110;ko04111;ko04113	O43929	Origin recognition complex subunit 4 OS=Homo sapiens GN=ORC4 PE=1 SV=2
-0.00626741	0.425356	0.106713	0.188115	0.304881	0.220324	0.0128478	0.129614	0.0450568	0.0543257	0.159976	0.349716	0.327899	0.337531	0.316234	0.139893	0.149525	0.128228	0.244841	0.19346	0.340881	0.481094	0.584524	0.602714	0.221367	0.324797	0.342987	Peroxisome	ko04146	O43933	Peroxisome biogenesis factor 1 OS=Homo sapiens GN=PEX1 PE=1 SV=1
-0.409945	-0.288695	-0.367818	-0.4144	-0.286347	-0.404926	-0.058914	0.069139	-0.04944	-0.327728	-0.492337	-0.569535	-0.351337	-0.731952	-0.204603	0.111863	-0.268752	0.258597	-0.0924513	-0.519987	0.22082	-0.209125	-0.590367	-0.148856	-0.0785856	-0.459828	-0.0183166	Cell cycle;Cell cycle - yeast	ko04110;ko04111	O60216	Double-strand-break repair protein rad21 homolog OS=Homo sapiens GN=RAD21 PE=1 SV=2
0.264791	0.00461242	0.203349	0.143256	-0.0350537	0.0904171	-0.0143281	-0.192638	-0.067167	0.134334	0.113893	0.0531371	0.117069	-0.0800738	0.0871332	0.0166143	-0.180529	-0.0133215	0.0382582	0.198476	0.190216	0.01876	0.0370721	0.096581	-0.123557	-0.105245	-0.0457357			O60220	Mitochondrial import inner membrane translocase subunit Tim8 A OS=Homo sapiens GN=TIMM8A PE=1 SV=1
0.143714	0.0719952	-0.0627666	-0.302161	-0.194677	-0.214221	-0.353142	-0.245658	-0.265202	0.0280534	0.0707461	-0.0061307	-0.25608	-0.157962	-0.216019	-0.28697	-0.188852	-0.246909	-0.0777495	-0.102695	-0.103363	-0.314217	-0.434168	-0.480289	-0.219615	-0.339566	-0.385687	Spliceosome	ko03040	O60231	Putative pre-mRNA-splicing factor ATP-dependent RNA helicase DHX16 OS=Homo sapiens GN=DHX16 PE=1 SV=2
-0.0819513	-0.101944	-0.160444	0.152282	0.0581994	0.0517104	0.267062	0.172979	0.16649	0.0245259	0.0621318	0.121759	0.370846	0.254845	0.252652	0.301374	0.185373	0.18318	-0.0501179	-0.0456758	-0.0100645	0.127748	0.15407	0.238582	0.163034	0.189356	0.273868			O60232	Sjoegren syndrome/scleroderma autoantigen 1 OS=Homo sapiens GN=SSSCA1 PE=1 SV=1
-0.504785	-0.244276	0.348786	-0.26292	-0.307298	0.132444	-0.129495	-0.173873	0.265869	-0.0567252	-0.311738	-0.205542	-0.0668212	0.00685551	-0.00331192	0.124514	0.198191	0.188023	0.18378	0.246654	-0.429215	0.462144	0.19596	-0.109364	0.461738	0.195554	-0.10977	Vascular smooth muscle contraction	ko04270	O60237	Protein phosphatase 1 regulatory subunit 12B OS=Homo sapiens GN=PPP1R12B PE=1 SV=2
0.0912944	-0.405208	-0.190093	-0.322794	-0.47045	-0.430275	-0.154792	-0.302448	-0.262273	-0.185328	-0.284325	-0.26964	-0.376008	-0.328391	-0.518955	-0.129577	-0.08196	-0.272524	-0.388847	-0.431085	-0.192006	-0.800267	-0.805205	-0.740014	-0.462954	-0.467892	-0.402701			O60244	Mediator of RNA polymerase II transcription subunit 14 OS=Homo sapiens GN=MED14 PE=1 SV=2
-0.0352759	0.0380251	0.0234081	-0.177709	-0.109026	-0.222777	-0.186428	-0.117745	-0.231496	0.0121003	0.0593334	-0.0126505	-0.0660557	0.00498886	-0.104081	-0.0856501	-0.0146055	-0.123675	-0.0762677	-0.182493	-0.0560817	-0.152298	-0.0401627	-0.0140196	-0.0473505	0.0647848	0.0909279			O60256	Phosphoribosyl pyrophosphate synthase-associated protein 2 OS=Homo sapiens GN=PRPSAP2 PE=1 SV=1
-0.237273	-0.230864	-0.186976	-0.0245001	0.0679464	-0.000768327	0.193871	0.286317	0.217603	-0.236313	-0.102041	-0.148205	-0.472541	-0.346603	-0.415634	-0.310355	-0.184417	-0.253448	-0.201126	-0.191964	-0.183789	-0.324697	-0.222214	-0.29419	-0.132404	-0.029921	-0.101897			O60264	SWI/SNF-related matrix-associated actin-dependent regulator of chromatin subfamily A member 5 OS=Homo sapiens GN=SMARCA5 PE=1 SV=1
0.0383954	-0.261864	-0.0230191	-0.498456	-0.522712	-0.381085	-0.416293	-0.440549	-0.298922	-0.0963806	-0.00614599	0.0871623	-0.162098	-0.0841299	0.0972024	-0.156977	-0.0790085	0.102324	0.335691	0.303099	0.147423	-0.16938	-0.0796603	-0.212514	-0.431451	-0.341731	-0.474585			O60268	Uncharacterized protein KIAA0513 OS=Homo sapiens GN=KIAA0513 PE=1 SV=1
0.0041924	0.0534418	-0.00824308	0.00779704	0.0758992	0.144025	-0.00866667	0.0594355	0.127561	0.101023	0.228885	0.0843337	0.102348	0.226811	0.0615092	-0.0357326	0.0887304	-0.0765714	0.0342833	0.160615	0.11068	0.0939587	0.185404	0.201887	-0.00790073	0.0835446	0.100028			O60271	C-Jun-amino-terminal kinase-interacting protein 4 OS=Homo sapiens GN=SPAG9 PE=1 SV=4
0.0783159	0.219282	0.23496	0.0796466	0.0882557	0.000228165	-0.0978727	-0.0892636	-0.177291	0.0306426	0.218481	0.0845458	-0.326445	-0.179531	-0.248702	-0.437668	-0.290754	-0.359925	0.681287	0.45936	0.515263	0.540594	0.277962	0.248521	-0.011376	-0.274008	-0.303449			O60282	Kinesin heavy chain isoform 5C OS=Homo sapiens GN=KIF5C PE=1 SV=1
-0.0666534	-0.0126356	0.0403551	-0.189667	-0.023155	-0.162613	-0.176689	-0.010177	-0.149635	-0.254568	-0.236408	-0.201581	-0.234594	-0.189081	-0.139952	-0.00374167	0.0417713	0.0909003	-0.242048	-0.219394	-0.263334	-0.327618	-0.148465	-0.273484	-0.086026	0.093127	-0.031892			O60287	Nucleolar pre-ribosomal-associated protein 1 OS=Homo sapiens GN=URB1 PE=1 SV=4
-0.361941	-0.368022	-0.259871	0.116749	0.124659	0.100843	0.446694	0.454604	0.430788	-0.441607	-0.377762	-0.523652	0.240526	0.127485	0.186567	0.6882	0.575159	0.634241	0.0132806	0.0320438	-0.261813	0.409834	0.111443	0.0793336	0.481997	0.183606	0.151496	Ubiquitin mediated proteolysis	ko04120	O60291	E3 ubiquitin-protein ligase MGRN1 OS=Homo sapiens GN=MGRN1 PE=1 SV=2
0.312653	0.280674	-1.28814	-0.559524	-0.484255	-0.769352	-0.32792	-0.252651	-0.537748	0.104645	0.396254	0.12919	-0.142922	-0.0666769	-0.0952971	-0.352952	-0.276707	-0.305327	-0.000809045	0.205348	-0.037849	-0.430527	0.0122305	-0.364736	-0.48609	-0.0433328	-0.420299			O60292	Signal-induced proliferation-associated 1-like protein 3 OS=Homo sapiens GN=SIPA1L3 PE=1 SV=3
1.10557	0.984714	0.121362	0.752806	0.0809589	-0.223419	0.0155907	-0.656256	-0.960634	0.358061	-0.347623	-0.126536	0.362948	0.0287425	0.168529	0.401647	0.0674418	0.207228	-0.117515	-0.44061	-0.14278	-0.403455	-0.614041	-0.80482	-0.16982	-0.380406	-0.571185			O60293	Zinc finger C3H1 domain-containing protein OS=Homo sapiens GN=ZFC3H1 PE=1 SV=3
-0.052242	-0.121534	-0.00270155	0.22892	-0.0335333	0.131639	0.287746	0.0252925	0.190465	-0.0526329	-0.103524	-0.202503	-0.00866598	0.140826	-0.00815235	0.110887	0.260379	0.111401	-0.363607	-0.374758	-0.350583	-0.493796	-0.373356	-0.305549	-0.130813	-0.0103733	0.0574337	Histidine metabolism;Polycyclic aromatic hydrocarbon degradation;Tyrosine metabolism	ko00340;ko00350;ko00624	O60294	tRNA wybutosine-synthesizing protein 4 OS=Homo sapiens GN=LCMT2 PE=1 SV=3
0.429821	-0.0962523	0.188841	0.393137	-0.266094	0.0693157	0.219	-0.440231	-0.104821	-0.181271	-0.382494	0.0799262	0.0801029	-0.596588	-1.98754	0.241382	-0.435308	-1.82626	0.168869	-0.396654	0.0218183	0.612733	-0.4818	-0.592793	0.681389	-0.413144	-0.524137			O60303	Protein KIAA0556 OS=Homo sapiens GN=KIAA0556 PE=1 SV=4
-0.0974629	-0.0443067	-0.0572049	-0.290689	-0.260625	-0.277501	-0.224364	-0.1943	-0.211176	-0.193854	-0.214684	-0.330222	-0.28163	-0.29131	-0.331447	-0.0353767	-0.0450567	-0.0851937	-0.189441	-0.152002	-0.248641	-0.308573	-0.358948	-0.348472	-0.111878	-0.162253	-0.151777	Spliceosome	ko03040	O60306	Intron-binding protein aquarius OS=Homo sapiens GN=AQR PE=1 SV=4
-0.0525311	-0.265439	0.293468	0.162976	0.310478	0.294075	0.171143	0.318645	0.302242	0.10662	0.300881	0.280342	0.30689	0.660495	0.286154	0.077609	0.431214	0.056873	0.302892	0.279291	0.351221	0.580497	0.737301	0.638516	0.269362	0.426166	0.327381			O60307	Microtubule-associated serine/threonine-protein kinase 3 OS=Homo sapiens GN=MAST3 PE=1 SV=2
-0.100082	-0.0827264	-0.180732	0.0570307	0.0520693	-0.0296249	0.178211	0.173249	0.0915552	0.0425593	-0.0129951	-0.0857319	-0.0109658	-0.0499119	-0.140238	0.00775677	-0.0311893	-0.121515	-0.0825224	-0.0755348	-0.0824741	0.128597	0.128837	0.0463956	0.208774	0.209014	0.126573			O60313	Dynamin-like 120 kDa protein, mitochondrial OS=Homo sapiens GN=OPA1 PE=1 SV=3
0.0090556	0.0231303	0.0483415	-0.175473	-0.168272	-0.131582	-0.202315	-0.195114	-0.158424	-0.0389253	0.0560067	-0.119088	-0.0514278	-0.0355294	-0.0675831	-0.0174256	-0.0015272	-0.0335809	-0.0281428	-0.0378927	-0.0779988	-0.0668321	-0.243837	-0.19871	-0.0188207	-0.195826	-0.150699			O60318	Germinal-center associated nuclear protein OS=Homo sapiens GN=MCM3AP PE=1 SV=2
0.31796	-0.469295	0.0438037	-0.190634	-0.566513	0.191047	-0.15479	-0.530669	0.226891	-0.10365	-0.297986	-0.045569	-0.0523128	-0.0995159	-0.272877	0.0967555	0.0495524	-0.123809	-0.0836052	-0.0809122	-0.0514871	-0.303451	-0.530233	-0.188057	-0.23145	-0.458231	-0.116055	Endocytosis;Fc gamma R-mediated phagocytosis;Inositol phosphate metabolism;Phosphatidylinositol signaling system;Regulation of actin cytoskeleton	ko00562;ko04070;ko04144;ko04666;ko04810	O60331	Phosphatidylinositol 4-phosphate 5-kinase type-1 gamma OS=Homo sapiens GN=PIP5K1C PE=1 SV=2
-0.101324	-0.0549283	-0.219716	-0.282916	-0.0492826	-0.197775	-0.157593	0.0760402	-0.0724522	0.278612	0.30033	0.218995	0.21374	0.158707	0.181907	-0.052239	-0.107272	-0.084072	-0.00164779	0.0602678	0.189898	0.0699118	0.240352	0.291629	-0.0129275	0.157513	0.20879			O60333	Kinesin-like protein KIF1B OS=Homo sapiens GN=KIF1B PE=1 SV=5
-0.0966514	-0.134374	-0.197449	-0.165968	-0.196279	-0.140288	-0.0231432	-0.0534542	0.0025368	-0.301522	-0.363079	-0.38841	-0.241938	-0.304046	-0.345205	0.109066	0.0469577	0.00579867	-0.130156	-0.136124	-0.153658	-0.220172	-0.212084	-0.248602	-0.0801927	-0.0721047	-0.108623			O60341	Lysine-specific histone demethylase 1A OS=Homo sapiens GN=KDM1A PE=1 SV=2
0.230119	0.237875	0.269833	0.310275	0.152465	0.166632	0.0643327	-0.0934773	-0.0793103	0.251871	0.0842999	0.133587	0.340249	0.320392	0.335672	0.183663	0.163806	0.179086	0.13364	0.0160327	0.129461	0.263413	0.211996	0.33645	0.170368	0.118951	0.243405			O60343	TBC1 domain family member 4 OS=Homo sapiens GN=TBC1D4 PE=1 SV=2
-0.348112	-0.340822	-0.152822	0.0219711	0.174497	0.285324	0.302556	0.455082	0.565909	-0.627389	-0.266354	-0.51384	-0.042166	-0.0922719	-0.0389567	0.427028	0.376922	0.430238	-0.178988	-0.307521	-0.39213	0.0664633	-0.251885	-0.0610471	0.359343	0.0409947	0.231833	Basal cell carcinoma;Melanogenesis;Pathways in cancer;Wnt signaling pathway	ko04310;ko04916;ko05200;ko05217	O60353	Frizzled-6 OS=Homo sapiens GN=FZD6 PE=1 SV=2
-0.96456	-0.945967	-0.721836	-1.3322	-1.42274	-1.03416	-0.454746	-0.545286	-0.156706	-0.0618114	-0.073174	-0.153463	-0.922013	-1.16305	-1.18623	-0.825864	-1.0669	-1.09008	0.304381	0.232326	0.112145	-0.735934	-0.636305	-0.940734	-0.952218	-0.852589	-1.15702	Biosynthesis of unsaturated fatty acids	ko01040	O60427	Fatty acid desaturase 1 OS=Homo sapiens GN=FADS1 PE=1 SV=3
0.384094	0.168826	0.117064	0.432765	0.169878	0.24031	0.209437	-0.05345	0.016982	0.145318	0.0430017	0.212712	-0.0946612	0.137947	0.0797231	-0.228338	0.00426977	-0.0539541	0.282315	0.0302265	0.371046	0.263896	0.174448	0.261593	0.0360335	-0.0534145	0.0337305			O60437	Periplakin OS=Homo sapiens GN=PPL PE=1 SV=4
0.851685	0.315353	0.298873	1.07669	0.538543	0.21627	0.588053	0.049906	-0.272367	0.259321	0.0209291	0.0174953	0.0998692	0.084376	0.210431	0.000620733	-0.0148725	0.111183	0.1582	0.183229	0.203159	0.429679	0.415576	0.161505	0.24815	0.234047	-0.0200243			O60447	Ecotropic viral integration site 5 protein homolog OS=Homo sapiens GN=EVI5 PE=1 SV=3
-0.293091	-0.133671	-0.120021	0.167129	0.416801	0.174658	0.34939	0.599062	0.356919	-0.0454093	0.138666	0.0301697	0.23677	0.213075	0.225585	0.195628	0.171933	0.184443	-0.24188	-0.137126	-0.0273631	0.014965	0.0951546	0.216595	0.150421	0.230611	0.352051	N-Glycan biosynthesis;Protein processing in endoplasmic reticulum;Various types of N-glycan biosynthesis	ko00510;ko00513;ko04141	O60476	Mannosyl-oligosaccharide 1,2-alpha-mannosidase IB OS=Homo sapiens GN=MAN1A2 PE=1 SV=1
-0.0071963	0.0705666	0.127392	-0.347358	0.156247	0.137169	-0.410945	0.0926596	0.0735816	0.0390158	0.145747	0.104749	0.123994	0.132453	0.126804	0.0274901	0.0359491	0.0303001	0.209224	0.236653	-0.143606	0.263763	0.396033	0.105014	0.163006	0.295276	0.004257			O60493	Sorting nexin-3 OS=Homo sapiens GN=SNX3 PE=1 SV=3
-0.013567	0.043631	-0.195004	-0.0853895	-0.141786	0.0650127	-0.0304095	-0.086806	0.119993	-0.101894	0.646332	-0.112162	0.223876	-0.11665	-0.153889	0.079784	-0.260742	-0.297981	-0.488124	0.281523	-0.11565	-0.510135	-0.115845	-0.229529	-0.402718	-0.008428	-0.122112	SNARE interactions in vesicular transport	ko04130	O60499	Syntaxin-10 OS=Homo sapiens GN=STX10 PE=1 SV=1
-0.182949	-0.274096	-0.319374	0.0451983	-0.0576465	-0.188274	0.304005	0.20116	0.0705323	-0.627153	-0.498791	-0.62773	-0.231711	-0.186663	-0.235288	0.352847	0.397895	0.34927	-0.42979	-0.504879	-0.36341	-0.257446	-0.348043	-0.229327	0.175247	0.08465	0.203366			O60502	Protein O-GlcNAcase OS=Homo sapiens GN=MGEA5 PE=1 SV=2
-0.177083	-0.0603715	-0.200647	-0.355839	-0.686046	-0.687171	-0.209805	-0.540012	-0.541137	-0.356225	-0.485998	-0.42599	-0.111645	-0.0922623	0.157662	0.311093	0.330475	0.5804	-0.181393	-0.0812377	-0.0854764	-0.396694	-0.39117	-0.127672	-0.280658	-0.275134	-0.0116363			O60504	Vinexin OS=Homo sapiens GN=SORBS3 PE=1 SV=2
-0.0983049	0.0233937	-0.000150579	-0.132458	-0.0521433	-0.117075	-0.107437	-0.0271227	-0.0920544	-0.17791	0.0112894	-0.0607437	-0.18503	-0.039738	-0.148481	-0.109242	0.0360501	-0.0726929	0.015657	0.0610886	-0.138778	-0.08577	0.0866902	-0.153253	-0.0650925	0.107368	-0.132576			O60506	Heterogeneous nuclear ribonucleoprotein Q OS=Homo sapiens GN=SYNCRIP PE=1 SV=2
-0.123615	-0.032337	-1.13618e-05	-0.495836	-0.485196	-0.373272	-0.443848	-0.433208	-0.321284	-0.00916188	-0.155278	-0.0124393	-0.529869	-0.482185	-0.459054	-0.470909	-0.423225	-0.400094	-0.197577	-0.242735	-0.222916	-0.675621	-0.61278	-0.654678	-0.454545	-0.391704	-0.433602	Spliceosome	ko03040	O60508	Pre-mRNA-processing factor 17 OS=Homo sapiens GN=CDC40 PE=1 SV=1
-0.0223423	0.0183317	-0.0487782	-0.0466593	0.11702	0.0718452	-0.029063	0.134616	0.0894415	-0.173773	-0.0498808	-0.00808185	0.0101278	0.00442103	0.00311702	0.087373	0.0816662	0.0803622	-0.0598756	0.00228891	-0.0569442	0.0311433	0.0300659	-0.11844	0.0693203	0.0682429	-0.080263			O60518	Ran-binding protein 6 OS=Homo sapiens GN=RANBP6 PE=1 SV=2
0.246941	0.137993	0.250393	0.239989	0.215475	0.273392	0.0282133	0.00369933	0.0616163	0.173678	0.0971877	0.13994	0.335698	0.241643	0.282453	0.198763	0.104708	0.145518	0.229072	0.256673	0.0854986	0.424654	0.307433	0.244398	0.234239	0.117018	0.0539835			O60524	Nuclear export mediator factor NEMF OS=Homo sapiens GN=NEMF PE=1 SV=4
0.101975	0.0161552	-0.0755107	-0.0751905	-0.16505	-0.0950401	-0.089397	-0.179256	-0.109247	0.0791315	-0.093754	0.0423488	-0.136972	-0.129848	-0.0787691	-0.146214	-0.13909	-0.0880112	-0.0501007	-0.0871466	0.004566	-0.108762	-0.14313	-0.126184	-0.0645349	-0.0989029	-0.0819569	Amino sugar and nucleotide sugar metabolism;Fructose and mannose metabolism	ko00051;ko00520	O60547	GDP-mannose 4,6 dehydratase OS=Homo sapiens GN=GMDS PE=1 SV=1
-0.261945	-0.133772	-0.0147634	0.0494337	-0.00905883	0.207181	0.18626	0.127768	0.344008	-0.214897	-0.135813	-0.106312	0.0701315	0.115549	0.400425	0.222472	0.26789	0.552766	-0.228837	-0.350379	-0.050877	-0.216236	0.113095	0.313495	-0.006205	0.323126	0.523526			O60551	Glycylpeptide N-tetradecanoyltransferase 2 OS=Homo sapiens GN=NMT2 PE=1 SV=1
-0.00469345	0.249504	0.130573	-4.96243e-05	0.206387	-0.0262952	-0.125177	0.0812591	-0.151423	0.0412236	-0.0673927	-0.0526757	0.110006	0.0547645	0.0321843	0.136288	0.0810461	0.0584659	0.0481974	-0.25173	0.0235556	-0.0367144	-0.209643	-0.0695407	0.0232779	-0.149651	-0.00954837			O60563	Cyclin-T1 OS=Homo sapiens GN=CCNT1 PE=1 SV=1
0.138956	-0.0528128	0.00736521	0.0119328	-0.11074	-0.0835174	-0.0192367	-0.141909	-0.114687	0.111214	0.157017	0.235092	-0.563587	-0.618211	-0.524171	-0.731361	-0.785985	-0.691945	0.113868	0.22968	-0.0015459	-0.360756	-0.249228	-0.337289	-0.474757	-0.363229	-0.45129	Cell cycle	ko04110	O60566	Mitotic checkpoint serine/threonine-protein kinase BUB1 beta OS=Homo sapiens GN=BUB1B PE=1 SV=3
-0.141242	-0.233568	-0.204656	-0.0559946	-0.152407	-0.123652	0.137161	0.0407483	0.0695033	-0.0349089	-0.106532	-0.105428	0.0697674	-0.077729	-0.110015	0.152057	0.00456063	-0.0277254	0.0560314	0.0345191	-0.0215649	-0.036865	-0.0590649	0.178258	-0.0598602	-0.0820601	0.155263	Lysine degradation;Other types of O-glycan biosynthesis	ko00310;ko00514	O60568	Procollagen-lysine,2-oxoglutarate 5-dioxygenase 3 OS=Homo sapiens GN=PLOD3 PE=1 SV=1
-0.00919451	0.0237362	-0.0381523	-0.110838	-0.331279	-0.145711	-0.102968	-0.323409	-0.137841	-0.0240272	0.181411	0.0401324	0.0148464	0.162659	0.137004	-0.0509923	0.0968203	0.0711653	0.00235163	0.0602354	0.120843	-0.0771215	-0.0050885	0.0916607	-0.138265	-0.0662318	0.0305174	Insulin signaling pathway;mTOR signaling pathway;RNA transport	ko03013;ko04150;ko04910	O60573	Eukaryotic translation initiation factor 4E type 2 OS=Homo sapiens GN=EIF4E2 PE=1 SV=1
0.161106	0.256036	0.0166933	0.249062	0.247932	0.0881803	0.10445	0.10332	-0.0564315	0.0328158	0.201964	0.0348258	0.218288	0.417374	0.425841	0.128419	0.327505	0.335972	0.194094	0.202735	0.265915	0.385191	0.373055	0.497144	0.164276	0.15214	0.276229			O60583	Cyclin-T2 OS=Homo sapiens GN=CCNT2 PE=1 SV=2
-0.275532	-0.17585	-0.207192	-0.232597	-0.191058	-0.242824	-0.0130723	0.0284667	-0.0232993	-0.15114	-0.066928	-0.054332	-0.317349	-0.210248	-0.210395	-0.226549	-0.119448	-0.119595	-0.144339	-0.107983	-0.0694686	-0.394435	-0.34002	-0.291826	-0.287171	-0.232756	-0.184562	Focal adhesion;Regulation of actin cytoskeleton;Shigellosis	ko04510;ko04810;ko05131	O60610	Protein diaphanous homolog 1 OS=Homo sapiens GN=DIAPH1 PE=1 SV=2
0.557749	0.521742	0.463169	0.648916	0.81889	0.878175	0.134696	0.30467	0.363955	0.540831	0.492949	0.599683	0.96525	0.748298	0.81004	0.420762	0.20381	0.265552	0.17553	-0.0802527	0.304492	0.480138	0.127178	0.285278	0.346882	-0.00607843	0.152022			O60613	Selenoprotein F OS=Homo sapiens OX=9606 GN=SELENOF PE=1 SV=4
0.557749	0.521742	0.463169	0.648916	0.81889	0.878175	0.134696	0.30467	0.363955	0.540831	0.492949	0.599683	0.96525	0.748298	0.81004	0.420762	0.20381	0.265552	0.17553	-0.0802527	0.304492	0.480138	0.127178	0.285278	0.346882	-0.00607843	0.152022			O60613	Selenoprotein F OS=Homo sapiens GN=SELENOF PE=1 SV=3
-0.0655142	-0.142715	-0.150454	0.0199941	-0.0640226	-0.03747	0.139555	0.0555385	0.0820911	0.265895	-0.0419678	-0.0111551	0.208606	0.0456564	0.142749	0.137682	-0.0252676	0.071825	0.119351	0.110881	0.180555	0.114203	0.301232	0.376221	-0.022726	0.164303	0.239292	Tight junction	ko04530	O60645	Exocyst complex component 3 OS=Homo sapiens OX=9606 GN=EXOC3 PE=1 SV=3
-0.0655142	-0.142715	-0.150454	0.0199941	-0.0640226	-0.03747	0.139555	0.0555385	0.0820911	0.265895	-0.0419678	-0.0111551	0.208606	0.0456564	0.142749	0.137682	-0.0252676	0.071825	0.119351	0.110881	0.180555	0.114203	0.301232	0.376221	-0.022726	0.164303	0.239292	Tight junction	ko04530	O60645	Exocyst complex component 3 OS=Homo sapiens GN=EXOC3 PE=1 SV=2
0.0246354	0.0512443	-0.0469463	0.154227	0.0950889	-0.0219155	0.144583	0.0854444	-0.03156	0.0378369	-0.0341027	-0.0448838	0.0674972	-0.0109093	0.0028049	0.0812137	0.00280723	0.0165214	-0.0166749	0.0665072	0.00611702	-0.0144518	0.132484	0.126049	-0.0331016	0.113834	0.107399			O60664	Perilipin-3 OS=Homo sapiens GN=PLIN3 PE=1 SV=3
-0.119865	0.3791	-0.247984	0.105732	0.359315	-0.0838448	0.101982	0.355565	-0.0875951	0.0766481	-0.122594	-0.194734	-0.0730425	0.0803409	-0.137593	0.00718413	0.160568	-0.0573664	0.251438	-0.276962	0.123624	-0.102952	-0.3554	-0.0399733	-0.135652	-0.3881	-0.0726733			O60669	Monocarboxylate transporter 2 OS=Homo sapiens GN=SLC16A7 PE=1 SV=2
0.0519072	-0.0256334	-0.318231	-0.332945	-0.0913799	-0.384164	-0.235626	0.00593917	-0.286845	0.167967	0.0241226	-0.222943	-0.011818	-0.0385425	-0.261248	-0.00153353	-0.028258	-0.250964	-0.139375	-0.180271	-0.232831	-0.378545	-0.381922	-0.403171	-0.194386	-0.197763	-0.219012	Cell cycle - yeast;Meiosis - yeast	ko04111;ko04113	O60671	Cell cycle checkpoint protein RAD1 OS=Homo sapiens GN=RAD1 PE=1 SV=1
-0.0959432	-0.0392961	-0.0687235	0.0507717	0.0206695	0.0405254	0.118759	0.0886571	0.108513	-0.218633	-0.0702579	-0.117426	0.00457734	0.0548992	0.0763765	0.140016	0.190338	0.211815	0.0677326	-0.223022	-0.00368295	0.158388	-0.0489044	0.0573195	0.211379	0.00408638	0.11031			O60678	Protein arginine N-methyltransferase 3 OS=Homo sapiens OX=9606 GN=PRMT3 PE=1 SV=4
-0.0959432	-0.0392961	-0.0687235	0.0507717	0.0206695	0.0405254	0.118759	0.0886571	0.108513	-0.218633	-0.0702579	-0.117426	0.00457734	0.0548992	0.0763765	0.140016	0.190338	0.211815	0.0677326	-0.223022	-0.00368295	0.158388	-0.0489044	0.0573195	0.211379	0.00408638	0.11031			O60678	Protein arginine N-methyltransferase 3 OS=Homo sapiens GN=PRMT3 PE=1 SV=3
-0.0794038	-0.396031	-0.223909	0.08396	-0.13114	0.0559637	0.317075	0.101975	0.289078	-0.153244	-0.296524	-0.187642	0.295716	0.0385719	0.0535575	0.508186	0.251042	0.266028	-0.195046	-0.309631	-0.227373	0.00864203	-0.0524096	-0.0369939	0.252659	0.191607	0.207023			O60684	Importin subunit alpha-7 OS=Homo sapiens GN=KPNA6 PE=1 SV=1
0.20684	0.150706	0.398584	0.21534	0.109794	0.284192	-0.0367033	-0.142249	0.0321487	0.134218	0.0752666	0.121857	0.193202	0.0920937	0.22194	0.0827548	-0.0183535	0.111493	0.0758349	-0.0409956	0.0674247	-0.0097759	0.0616599	0.0986888	-0.0438639	0.0275719	0.0646008	Amino sugar and nucleotide sugar metabolism;Ascorbate and aldarate metabolism;Pentose and glucuronate interconversions;Starch and sucrose metabolism	ko00040;ko00053;ko00500;ko00520	O60701	UDP-glucose 6-dehydrogenase OS=Homo sapiens GN=UGDH PE=1 SV=1
0.197961	0.274474	0.134975	0.139227	0.0845611	0.0666283	-0.063243	-0.117909	-0.135842	0.211185	0.198852	0.160954	0.00750219	-0.0178899	-0.0846703	-0.182828	-0.20822	-0.275001	0.173114	0.214398	0.29043	-0.101786	-0.0122942	-0.117077	-0.327767	-0.238275	-0.343058	Adherens junction;Leukocyte transendothelial migration	ko04520;ko04670	O60716	Catenin delta-1 OS=Homo sapiens GN=CTNND1 PE=1 SV=1
0.146322	0.0926113	0.0603461	-0.577101	-0.482614	-0.601467	-0.676861	-0.582374	-0.701227	-0.111662	0.121	0.0286721	0.121677	0.134069	0.0770806	0.109007	0.121399	0.0644106	0.516726	0.192817	0.22095	0.147269	-0.388132	-0.225338	-0.162895	-0.698296	-0.535502	alpha-Linolenic acid metabolism;Arachidonic acid metabolism;Ether lipid metabolism;Fat digestion and absorption;Fc epsilon RI signaling pathway;Glycerophospholipid metabolism;GnRH signaling pathway;Linoleic acid metabolism;Long-term depression;MAPK signaling pathway;Pancreatic secretion;Toxoplasmosis;Vascular smooth muscle contraction;VEGF signaling pathway	ko00564;ko00565;ko00590;ko00591;ko00592;ko04010;ko04270;ko04370;ko04664;ko04730;ko04912;ko04972;ko04975;ko05145	O60733	85/88 kDa calcium-independent phospholipase A2 OS=Homo sapiens GN=PLA2G6 PE=1 SV=2
-0.0780965	-0.100119	0.0567795	0.134862	0.00153266	0.0681751	0.175341	0.0420113	0.108654	0.137043	-0.17482	-0.0332012	0.509764	0.26357	0.293159	0.533423	0.287229	0.316818	-0.233658	-0.256777	-0.157682	0.0584783	0.0825731	0.121395	0.274517	0.298612	0.337434	RNA transport	ko03013	O60739	Eukaryotic translation initiation factor 1b OS=Homo sapiens GN=EIF1B PE=1 SV=2
-0.0881746	-0.0256953	-0.0114793	-0.133841	-0.0354414	-0.0621493	-0.0920579	0.00634167	-0.0203662	-0.0338521	-0.0909331	-0.0747961	-0.153758	-0.164655	-0.138278	-0.0872309	-0.0981279	-0.0717509	-0.0947656	-0.0921463	-0.013167	-0.254848	-0.222343	-0.182366	-0.188155	-0.15565	-0.115673			O60749	Sorting nexin-2 OS=Homo sapiens GN=SNX2 PE=1 SV=2
0.0732561	0.0939198	0.125524	0.318778	0.296196	0.171926	0.221211	0.198629	0.0743594	0.0842547	-0.00155283	0.185915	0.178371	-0.108604	0.0322898	0.088832	-0.198143	-0.0572492	0.161301	0.00476851	0.160658	0.199706	0.0844949	0.237909	0.0907968	-0.0244143	0.129	N-Glycan biosynthesis	ko00510	O60762	Dolichol-phosphate mannosyltransferase subunit 1 OS=Homo sapiens GN=DPM1 PE=1 SV=1
-0.0879887	-0.0272427	0.0660503	0.00422692	0.0187655	0.0422121	0.0206206	0.0351592	0.0586058	0.00561678	0.0995093	0.0461909	-0.0196287	-0.0111252	0.0309346	-0.0700677	-0.0615642	-0.0195044	0.0177583	-0.00114506	0.0857826	-0.000311735	-0.078454	0.0331497	-0.0344437	-0.112586	-0.000982247			O60763	General vesicular transport factor p115 OS=Homo sapiens GN=USO1 PE=1 SV=2
0.51243	-0.0619743	0.356861	0.639925	0.234248	0.457157	0.370819	-0.0348576	0.188051	0.156846	0.332315	0.431691	0.155997	0.388507	0.214958	-0.150954	0.0815563	-0.0919927	0.0371688	0.172342	0.0153902	0.596776	0.149598	0.230726	0.521809	0.074631	0.155759			O60783	28S ribosomal protein S14, mitochondrial OS=Homo sapiens GN=MRPS14 PE=1 SV=1
-0.17826	-0.0560263	-0.0896306	-0.295431	-0.0404923	-0.209843	-0.187459	0.06748	-0.101871	-0.185693	0.0861841	-0.0351232	-0.260849	0.117589	-0.0752143	-0.215972	0.162466	-0.0303369	-0.049313	-0.0261491	0.036652	0.0874405	0.133279	0.150521	0.100377	0.146216	0.163458			O60784	Target of Myb protein 1 OS=Homo sapiens GN=TOM1 PE=1 SV=2
0.313445	0.0744631	0.21646	0.0160766	-0.046619	0.0529684	-0.185379	-0.248075	-0.148488	-0.0255173	-0.0590775	-0.0540208	0.001325	-0.000422014	0.0142072	0.0475302	0.0457832	0.0604124	0.0899442	0.104919	0.111982	0.0918764	0.0412158	-0.01417	-0.0104053	-0.0610659	-0.116452	Fructose and mannose metabolism	ko00051	O60825	6-phosphofructo-2-kinase/fructose-2,6-bisphosphatase 2 OS=Homo sapiens GN=PFKFB2 PE=1 SV=2
-0.0242772	-0.0236766	0.0244115	0.0510716	-0.0669984	0.0630627	0.058919	-0.059151	0.0709101	-0.0592247	-0.0214479	-0.0680956	-0.0513864	-0.0281625	-0.11946	-0.001797	0.0214269	-0.0698706	-0.0499137	0.0307608	-0.0648216	-0.0927349	-0.00553821	-0.0786761	-0.0647434	0.0224533	-0.0506846			O60826	Coiled-coil domain-containing protein 22 OS=Homo sapiens GN=CCDC22 PE=1 SV=1
-0.160772	-0.185797	-0.270953	0.0309405	-0.119006	0.0965683	0.236781	0.0868347	0.302409	-0.260775	-0.0211349	-0.177422	-0.442346	-0.250173	-0.372361	-0.289235	-0.0970624	-0.21925	0.0348389	0.353725	-0.0469407	-0.410203	0.00749146	-0.348019	-0.524077	-0.106383	-0.461893	Spliceosome	ko03040	O60828	Polyglutamine-binding protein 1 OS=Homo sapiens GN=PQBP1 PE=1 SV=1
-0.376359	0.204088	-0.421097	-0.0563147	-0.0258767	-0.621117	0.141475	0.171913	-0.423328	0.101089	-0.0946114	-0.014929	0.55733	-0.24348	-0.0769799	0.560147	-0.240663	-0.0741628	0.37125	0.459082	-0.472278	-0.0709989	-6.96062e-05	-0.456472	-0.19035	-0.119421	-0.575823			O60830	Mitochondrial import inner membrane translocase subunit Tim17-B OS=Homo sapiens GN=TIMM17B PE=1 SV=1
0.129596	0.444866	-0.0329996	0.491344	0.566637	0.499305	0.310857	0.38615	0.318818	-0.166763	0.256756	0.170485	-0.0060421	0.314122	-0.205426	-0.0928681	0.227296	-0.292252	0.0423671	0.303717	-0.0242422	0.135451	0.227995	0.024315	0.0281704	0.120714	-0.0829656			O60831	PRA1 family protein 2 OS=Homo sapiens GN=PRAF2 PE=1 SV=1
0.109645	0.00616681	0.0100677	0.0844314	-0.0017501	-0.131458	0.0424716	-0.0437099	-0.173418	-0.00445832	0.0492599	0.048802	-0.0683036	0.0670454	0.08427	-0.0995048	0.0358442	0.0530688	0.0816708	0.118503	0.0077773	-0.0117882	0.0317109	0.0122163	-0.0811052	-0.0376061	-0.0571007	Ribosome biogenesis in eukaryotes	ko03008	O60832	H/ACA ribonucleoprotein complex subunit 4 OS=Homo sapiens GN=DKC1 PE=1 SV=3
0.0375275	-0.0321072	-0.00449833	0.0490875	0.0863862	0.00971136	0.0487802	0.0860789	0.00940404	0.152404	-0.0350068	0.0284525	0.195167	0.0455542	0.144279	0.14655	-0.00306237	0.0956624	0.0124466	-0.0567846	0.00634928	0.107166	0.0813788	0.0692799	0.119829	0.0940417	0.0819428	RNA transport	ko03013	O60841	Eukaryotic translation initiation factor 5B OS=Homo sapiens GN=EIF5B PE=1 SV=4
0.167054	0.312014	0.319347	-0.036237	0.275301	0.188085	-0.302375	0.00916267	-0.0780533	0.327518	0.259977	0.244696	-0.14587	-0.0799531	-0.0988009	-0.423267	-0.35735	-0.376198	0.197866	0.323263	0.169507	-0.163584	-0.0640466	-0.36027	-0.393796	-0.294259	-0.590482			O60869	Endothelial differentiation-related factor 1 OS=Homo sapiens GN=EDF1 PE=1 SV=1
0.15279	-0.191209	-0.385746	-0.0863719	-0.433381	-0.904176	0.0550164	-0.291993	-0.762788	-0.294987	-0.26142	-0.107049	-0.463839	-0.331241	-0.314934	-0.242687	-0.110089	-0.093782	-0.486406	-0.396994	0.0523097	-0.776639	-0.226651	-0.362342	-0.499609	0.0503791	-0.0853119			O60870	DNA/RNA-binding protein KIN17 OS=Homo sapiens GN=KIN PE=1 SV=2
-0.137619	-0.0376002	-0.080814	-0.129043	-0.018961	-0.047867	-0.0436986	0.0663834	0.0374774	0.0102068	0.219533	0.0387394	-0.119394	0.0432212	-0.195983	-0.208887	-0.0462719	-0.285476	0.020821	-0.0216988	-0.105675	-0.337218	-0.276191	-0.490424	-0.3017	-0.240673	-0.454906	Regulation of actin cytoskeleton	ko04810	O60879	Protein diaphanous homolog 2 OS=Homo sapiens GN=DIAPH2 PE=1 SV=1
-0.0202911	-0.107742	-0.0825533	0.0882555	0.108799	-0.0553935	0.158451	0.178994	0.014802	-0.257223	-0.165917	0.0374619	-0.0064898	-0.0304309	0.131609	0.12207	0.0981285	0.260168	0.0359685	-0.0599285	0.00806854	-0.0455172	-0.0852453	-0.0628307	-0.04022	-0.0799481	-0.0575335	Protein processing in endoplasmic reticulum	ko04141	O60884	DnaJ homolog subfamily A member 2 OS=Homo sapiens GN=DNAJA2 PE=1 SV=1
0.0450597	-0.163556	-0.151418	0.181638	-0.316421	-0.21098	0.271609	-0.22645	-0.121009	-0.260146	-0.1085	-0.168614	-0.346031	-0.270417	-0.212492	-0.166944	-0.0913303	-0.0334053	-0.154427	-0.169319	-0.187204	-0.246873	-0.2174	-0.284621	-0.0765563	-0.0470833	-0.114304			O60885	Bromodomain-containing protein 4 OS=Homo sapiens GN=BRD4 PE=1 SV=2
0.551385	-0.480153	0.204861	0.456196	-0.309961	0.202788	0.364165	-0.401992	0.110757	0.0233689	0.23224	-0.609998	0.206584	0.46859	-0.490173	0.324714	0.58672	-0.372043	-0.648278	-0.405078	-0.773667	0.0296659	-0.313054	-0.42976	0.638674	0.295954	0.179248			O60888	Protein CutA OS=Homo sapiens GN=CUTA PE=1 SV=2
-0.0557561	-0.0368185	-0.308869	-0.373008	-0.459578	-0.739571	-0.239193	-0.325763	-0.605756	-0.198643	-0.0450426	-0.119333	-0.380849	-0.478887	-0.51916	-0.259843	-0.357881	-0.398154	-0.119491	-0.281933	-0.101123	-0.373485	-0.571049	-0.359794	-0.205969	-0.403533	-0.192278			O60890	Oligophrenin-1 OS=Homo sapiens GN=OPHN1 PE=1 SV=1
0.320805	0.154267	0.0265046	0.348033	0.6149	0.469597	0.180841	0.447708	0.302405	0.34972	-0.237264	0.163794	0.41719	0.294549	0.423754	0.325107	0.202466	0.331671	0.450002	0.33682	0.010627	0.54747	0.430406	0.35194	0.281654	0.16459	0.0861237	Sphingolipid metabolism	ko00600	O60906	Sphingomyelin phosphodiesterase 2 OS=Homo sapiens GN=SMPD2 PE=1 SV=2
-0.329067	-0.0118312	-0.165758	-0.0445885	0.026321	0.0830667	0.124297	0.195206	0.251952	-0.522199	-0.283484	-0.224175	-0.227121	-0.0741112	-0.0189039	0.116165	0.269175	0.324382	-0.247695	-0.315337	0.0413989	-0.122213	-0.303225	0.151352	0.0516647	-0.129347	0.32523	Wnt signaling pathway	ko04310	O60907	F-box-like/WD repeat-containing protein TBL1X OS=Homo sapiens GN=TBL1X PE=1 SV=3
-0.042937	-0.845147	-0.967571	-0.317073	-0.587497	-0.643284	0.301479	0.0310547	-0.0247323	-0.444749	-0.209629	-0.485344	-1.26245	-1.19851	-1.25618	-0.882543	-0.818603	-0.876273	-0.883225	-0.894837	-0.48642	-2.05335	-1.55659	-1.87214	-1.29852	-0.801763	-1.11731	Lysosome	ko04142	O60911	Cathepsin L2 OS=Homo sapiens GN=CTSV PE=1 SV=2
0.138544	-0.0589003	0.177817	0.119473	-0.0300503	0.198887	0.0336528	-0.115871	0.113067	-0.101085	-0.291954	-0.43398	-0.0968057	-0.208777	-0.310283	0.178867	0.066896	-0.03461	0.145417	0.158004	-0.189635	0.0784262	-0.0226146	-0.223236	0.0404975	-0.0605433	-0.261165			O60921	Checkpoint protein HUS1 OS=Homo sapiens GN=HUS1 PE=1 SV=1
0.0304084	-0.0442151	0.117549	0.0404992	0.0998309	0.253904	0.00591843	0.0652501	0.219323	-0.0199839	0.0260301	0.0716012	0.0785334	0.172555	0.253054	0.0526509	0.146673	0.227172	0.00353936	-0.00778892	-0.0517171	0.0539102	0.0387453	-0.0113336	0.0725658	0.0574009	0.00732195			O60925	Prefoldin subunit 1 OS=Homo sapiens GN=PFDN1 PE=1 SV=2
-0.227159	0.0601461	-0.113896	0.0528243	0.119429	0.0847261	0.146461	0.213065	0.178362	0.110737	0.0842462	0.604445	0.202393	-0.154218	0.196807	-0.0640831	-0.420694	-0.0696691	-0.0790153	-0.0131181	0.154579	0.0248521	-0.107542	0.0574864	0.0040369	-0.128357	0.0366712			O60927	Protein phosphatase 1 regulatory subunit 11 OS=Homo sapiens GN=PPP1R11 PE=1 SV=1
-0.436007	0.257486	-0.574041	-0.271612	0.702027	-0.0454483	-0.020758	0.952881	0.205406	-0.125688	-0.0876431	-1.19173	-0.561265	-0.320911	-0.604987	-0.0929113	0.147443	-0.136633	-0.226896	-0.446825	-0.054283	-0.531268	-0.206328	-0.234385	-0.2886	0.03634	0.008283	DNA replication	ko03030	O60930	Ribonuclease H1 OS=Homo sapiens GN=RNASEH1 PE=1 SV=2
0.0229338	-0.147571	-0.0121636	0.0493968	-0.0974722	-0.0166988	0.0949971	-0.0518719	0.0289015	0.129892	0.223412	0.167691	0.163611	0.0996384	0.0171423	-0.010054	-0.0740266	-0.156523	-0.159384	-0.353281	-0.0842507	-0.0461583	-0.0675919	0.09118	0.152814	0.13138	0.290152	Homologous recombination	ko03440	O60934	Nibrin OS=Homo sapiens GN=NBN PE=1 SV=1
-0.249476	-0.164121	-0.0257215	0.044291	0.171105	0.17867	0.19073	0.317545	0.325109	-0.12401	0.0509169	-0.0897555	-0.135888	0.16383	0.163039	-0.0816051	0.218113	0.217322	-0.0341669	0.0299138	0.181974	0.224406	0.268938	0.516008	0.165166	0.209698	0.456768			O60936	Nucleolar protein 3 OS=Homo sapiens GN=NOL3 PE=1 SV=2
0.234161	0.173703	0.201537	0.119965	0.161171	0.0609815	-0.0831687	-0.0419627	-0.142152	0.121672	0.136304	-0.0322137	0.406083	0.341682	0.284939	0.330829	0.266428	0.209685	0.288903	0.215815	0.475051	0.365734	0.373974	0.565725	0.0391443	0.0473843	0.239135			O60941	Dystrobrevin beta OS=Homo sapiens GN=DTNB PE=1 SV=1
-0.152245	-0.0647376	-0.0993939	-0.314803	-0.289271	-0.235842	-0.209344	-0.183812	-0.130383	-0.454679	-0.253724	-0.453951	-0.321848	-0.255167	-0.194121	0.0656033	0.132284	0.19333	-0.222442	-0.270982	-0.275176	-0.0382391	-0.270402	-0.11619	0.217961	-0.014202	0.14001	mRNA surveillance pathway	ko03015	O60942	mRNA-capping enzyme OS=Homo sapiens GN=RNGTT PE=1 SV=1
-0.0347843	-0.15198	-0.120133	-0.131729	0.104094	-0.053748	-0.0294299	0.206393	0.0485511	0.169457	0.113301	0.0608818	-0.0891414	-0.260536	-0.1804	-0.203688	-0.375083	-0.294947	0.137775	-0.0315778	0.0895826	0.0727467	0.219138	0.0762843	0.00748677	0.153878	0.0110244	ABC transporters	ko02010	O75027	ATP-binding cassette sub-family B member 7, mitochondrial OS=Homo sapiens GN=ABCB7 PE=1 SV=2
-0.182409	-0.272995	-0.206151	-0.0442044	-0.129041	-0.0612662	0.176314	0.0914773	0.159252	-0.267498	-0.0591127	-0.0133822	0.0966903	-0.0423925	0.1656	0.210021	0.0709385	0.278931	-0.16996	-0.133974	-0.0320996	-0.0139252	0.244417	0.0430988	0.098086	0.356428	0.15511	Axon guidance	ko04360	O75044	SLIT-ROBO Rho GTPase-activating protein 2 OS=Homo sapiens OX=9606 GN=SRGAP2 PE=1 SV=3
-0.182409	-0.272995	-0.206151	-0.0442044	-0.129041	-0.0612662	0.176314	0.0914773	0.159252	-0.267498	-0.0591127	-0.0133822	0.0966903	-0.0423925	0.1656	0.210021	0.0709385	0.278931	-0.16996	-0.133974	-0.0320996	-0.0139252	0.244417	0.0430988	0.098086	0.356428	0.15511	Axon guidance	ko04360	O75044	SLIT-ROBO Rho GTPase-activating protein 2 OS=Homo sapiens GN=SRGAP2 PE=1 SV=2
-0.182409	-0.272995	-0.206151	-0.0442044	-0.129041	-0.0612662	0.176314	0.0914773	0.159252	-0.267498	-0.0591127	-0.0133822	0.0966903	-0.0423925	0.1656	0.210021	0.0709385	0.278931	-0.16996	-0.133974	-0.0320996	-0.0139252	0.244417	0.0430988	0.098086	0.356428	0.15511	Axon guidance	ko04360	O75044	SLIT-ROBO Rho GTPase-activating protein 2 OS=Homo sapiens GN=SRGAP2 PE=1 SV=3
-0.441931	-0.921395	-0.569929	-0.477276	-0.326167	-0.390239	0.167142	0.318251	0.254179	-0.2262	-0.026916	-0.129551	-0.0747981	0.0955513	0.0545107	0.0527576	0.223107	0.182066	-0.14601	-0.149558	-0.394015	-0.506809	-0.555474	-0.496795	-0.276948	-0.325613	-0.266934			O75063	Glycosaminoglycan xylosylkinase OS=Homo sapiens GN=FAM20B PE=1 SV=1
0.182184	-0.0710305	-0.327281	-0.716858	-0.732995	-0.654913	-0.644815	-0.660952	-0.58287	0.235248	0.144171	0.0793312	0.185405	-0.0790723	-0.267268	0.0324883	-0.231989	-0.420185	-0.117212	-0.252094	-0.052426	-0.654244	-0.55543	-0.13858	-0.513667	-0.414853	0.00199733			O75071	EF-hand calcium-binding domain-containing protein 14 OS=Homo sapiens GN=EFCAB14 PE=1 SV=1
0.110333	0.0366631	0.0681178	0.175958	0.054111	0.129173	0.104253	-0.0175936	0.0574684	0.0470544	-0.0634361	-0.0645355	0.0942222	0.0271558	0.0908556	0.121195	0.0541282	0.117828	0.111892	0.00620496	0.0248402	0.21359	0.100361	0.215624	0.165944	0.0527153	0.167978			O75083	WD repeat-containing protein 1 OS=Homo sapiens GN=WDR1 PE=1 SV=4
0.142654	0.185854	0.232571	0.17117	0.151482	0.202211	-0.0158563	-0.0355443	0.0151847	0.144324	0.098995	0.0879433	0.322847	0.269341	0.195504	0.212426	0.15892	0.0850832	0.0333775	-0.0997319	0.0177197	0.159971	0.0671258	0.139124	0.176183	0.0833374	0.155336			O75110	Probable phospholipid-transporting ATPase IIA OS=Homo sapiens GN=ATP9A PE=1 SV=3
0.0603894	-0.16644	-0.0755568	-0.126696	-0.0850427	0.14772	-0.0661602	-0.0245069	0.208256	0.355042	0.154311	0.276195	0.251192	0.156312	0.265921	-0.0106573	-0.105537	0.00407167	-0.238285	0.0183732	-0.239778	-0.0170184	0.15285	0.0465875	0.136212	0.30608	0.199817			O75113	NEDD4-binding protein 1 OS=Homo sapiens GN=N4BP1 PE=1 SV=4
-0.105055	0.00713959	0.0176917	0.0864293	0.11062	0.0858292	0.113171	0.137361	0.11257	-0.256712	-0.206643	-0.249587	-0.166873	-0.0140675	-0.118848	0.0707743	0.22358	0.118799	-0.105627	-0.0529278	0.0432941	-0.0604135	-0.0528415	0.0244028	-0.0219933	-0.0144213	0.062823	Axon guidance;Chemokine signaling pathway;Focal adhesion;Leukocyte transendothelial migration;Pathogenic Escherichia coli infection;Regulation of actin cytoskeleton;Shigellosis;TGF-beta signaling pathway;Vascular smooth muscle contraction;Wnt signaling pathway	ko04062;ko04270;ko04310;ko04350;ko04360;ko04510;ko04670;ko04810;ko05130;ko05131	O75116	Rho-associated protein kinase 2 OS=Homo sapiens GN=ROCK2 PE=1 SV=4
0.00141504	-0.0195104	-0.0537605	-0.0691844	-0.0864496	-0.081398	-0.0452324	-0.0624976	-0.057446	0.00289559	-0.0618946	-0.0112122	0.0390551	-0.0401477	0.0252559	0.0624588	-0.016744	0.0486596	0.155906	0.0718208	0.0799469	0.221067	0.141154	0.202206	0.118509	0.0385961	0.0996481			O75122	CLIP-associating protein 2 OS=Homo sapiens OX=9606 GN=CLASP2 PE=1 SV=3
0.00141504	-0.0195104	-0.0537605	-0.0691844	-0.0864496	-0.081398	-0.0452324	-0.0624976	-0.057446	0.00289559	-0.0618946	-0.0112122	0.0390551	-0.0401477	0.0252559	0.0624588	-0.016744	0.0486596	0.155906	0.0718208	0.0799469	0.221067	0.141154	0.202206	0.118509	0.0385961	0.0996481			O75122	CLIP-associating protein 2 OS=Homo sapiens GN=CLASP2 PE=1 SV=2
0.00327201	0.0541875	0.0112599	0.107008	0.0177541	0.229321	0.0841015	-0.00515237	0.206415	-0.206911	-0.0896202	-0.0827923	-0.211381	-0.139109	-0.115766	-0.0849398	-0.0126678	0.0106752	-0.392607	-0.249139	-0.531939	0.0363166	0.236102	-0.130401	0.427545	0.62733	0.260827			O75127	Pentatricopeptide repeat-containing protein 1, mitochondrial OS=Homo sapiens GN=PTCD1 PE=1 SV=2
0.26842	0.239503	0.232618	0.220851	0.153292	0.0748525	-0.025996	-0.093555	-0.171994	-0.319537	0.132228	0.302031	-0.675954	-0.0601233	0.0803838	-0.714195	-0.098364	0.0421431	0.484701	0.0120715	0.149487	0.524704	0.0578903	0.136122	0.309284	-0.15753	-0.0792978			O75128	Protein cordon-bleu OS=Homo sapiens GN=COBL PE=1 SV=2
-0.123344	-0.0482565	-0.0594244	-0.0731645	-0.139013	-0.117487	0.0038438	-0.0620047	-0.0404787	-0.0391742	-0.129533	-0.083577	0.0193193	-0.0437446	-0.0152131	0.103414	0.0403501	0.0688816	-0.109577	-0.0715482	-0.0260312	-0.10374	-0.0264714	0.003113	-0.0346879	0.0425807	0.0721651			O75131	Copine-3 OS=Homo sapiens GN=CPNE3 PE=1 SV=1
0.125697	0.248062	-1.05997	0.214174	0.142399	-0.521481	0.442911	0.371136	-0.292744	-0.106388	-0.0186541	0.174016	0.0143471	0.36714	0.575396	-0.00197753	0.350815	0.559071	0.202584	-0.673364	-0.130644	0.201074	-0.658186	0.0639356	0.401549	-0.457711	0.26441			O75140	DEP domain-containing protein 5 OS=Homo sapiens GN=DEPDC5 PE=1 SV=2
0.216651	-0.00528235	0.0391609	0.198851	-0.127425	0.0133857	0.115341	-0.210935	-0.0701241	0.304487	0.160519	0.61983	0.322191	0.0822441	0.724652	-0.039421	-0.279368	0.36304	-0.087588	0.185831	0.163986	0.339696	0.286815	0.234182	0.252286	0.199405	0.146772			O75143	Autophagy-related protein 13 OS=Homo sapiens GN=ATG13 PE=1 SV=1
0.369045	0.190799	-0.153855	0.751397	0.184583	0.0723673	0.616067	0.0492533	-0.0629624	-0.36734	-0.712616	-0.167449	0.297059	0.197945	0.693788	0.712861	0.613747	1.10959	0.0120138	-0.0884515	-0.501288	-0.336175	-0.555137	-0.813653	-0.1436	-0.362562	-0.621078			O75145	Liprin-alpha-3 OS=Homo sapiens GN=PPFIA3 PE=1 SV=3
-0.0670219	0.0121474	-0.0550626	-0.0594512	0.0103611	0.0546395	-0.0228055	0.0470068	0.0912852	-0.0493296	0.012046	-0.0365154	-0.173433	-0.0538097	-0.133228	-0.148833	-0.02921	-0.108628	-0.0817084	-0.14438	0.0471519	-0.125522	-0.117633	-0.0692397	-0.0658765	-0.0579875	-0.0095942			O75146	Huntingtin-interacting protein 1-related protein OS=Homo sapiens GN=HIP1R PE=1 SV=2
-0.0899698	-0.092065	-0.0604202	-0.0323337	0.0233594	0.0982483	0.0484846	0.104178	0.179067	0.0778505	-0.101085	0.00385577	0.068275	-0.197997	-0.17488	0.0747346	-0.191537	-0.16842	-0.237102	-0.342948	-0.198815	-0.10333	-0.221648	-0.313103	0.156292	0.0379737	-0.0534813			O75150	E3 ubiquitin-protein ligase BRE1B OS=Homo sapiens GN=RNF40 PE=1 SV=4
-0.0899698	-0.092065	-0.0604202	-0.0323337	0.0233594	0.0982483	0.0484846	0.104178	0.179067	0.0778505	-0.101085	0.00385577	0.068275	-0.197997	-0.17488	0.0747346	-0.191537	-0.16842	-0.237102	-0.342948	-0.198815	-0.10333	-0.221648	-0.313103	0.156292	0.0379737	-0.0534813			O75150	E3 ubiquitin-protein ligase BRE1B OS=Homo sapiens OX=9606 GN=RNF40 PE=1 SV=5
-0.246775	-0.365237	-0.0381449	-0.0413039	-0.604165	-0.404797	0.175415	-0.387446	-0.188078	-0.287429	0.537559	0.325151	0.228289	0.63725	0.408351	0.0365287	0.44549	0.216591	0.151254	0.232841	0.203171	0.562407	-0.476288	-0.634864	0.366652	-0.672043	-0.830619			O75151	Lysine-specific demethylase PHF2 OS=Homo sapiens GN=PHF2 PE=1 SV=4
-0.0995808	-0.167146	-0.0935355	-0.0306386	-0.316225	-0.263861	0.0894488	-0.196138	-0.143774	0.0273544	-0.205735	-0.100742	-0.175667	-0.112622	-0.0281025	-0.0826261	-0.0195811	0.0649384	-0.0692463	-0.10725	-0.183741	-0.165647	-0.257044	-0.294743	-0.0455679	-0.136965	-0.174664			O75152	Zinc finger CCCH domain-containing protein 11A OS=Homo sapiens GN=ZC3H11A PE=1 SV=3
-0.0809733	0.00823331	-0.135668	0.0918795	0.136256	0.0142789	0.161349	0.205725	0.0837482	-0.0122178	-0.0660414	-0.0385281	0.16137	0.165677	0.133507	0.200299	0.204606	0.172436	-0.0398743	-0.050295	-0.0124355	0.112647	0.130793	0.113303	0.146849	0.164995	0.147505			O75153	Clustered mitochondria protein homolog OS=Homo sapiens GN=CLUH PE=1 SV=2
-0.00731623	-0.699019	0.310409	-0.274222	-0.0454558	-0.140494	-0.142247	0.0865196	-0.00851859	0.0170116	-0.0217012	0.0622099	0.0288648	0.195576	0.57612	0.00969137	0.176403	0.556947	0.479665	-0.488173	-0.0973281	0.549628	0.0581496	0.0277957	0.584907	0.0934283	0.0630744			O75157	TSC22 domain family protein 2 OS=Homo sapiens GN=TSC22D2 PE=1 SV=3
0.17912	-0.151081	-0.059693	0.00178449	-0.253722	-0.201246	0.0123358	-0.243171	-0.190695	0.33572	0.294119	0.420773	0.252606	0.0840508	0.228199	-0.097598	-0.266153	-0.122005	0.367215	0.610366	0.562173	0.341199	0.326842	0.347162	-0.172052	-0.186409	-0.166089			O75164	Lysine-specific demethylase 4A OS=Homo sapiens GN=KDM4A PE=1 SV=2
0.0224872	0.0681971	0.0872327	-0.0365372	-0.0934207	-0.0248484	-0.0958429	-0.152726	-0.0841541	-0.0514038	-0.0899126	-0.0644585	0.0283604	0.0252997	0.0487016	0.096952	0.0938913	0.117293	-0.000392904	0.059759	0.0857669	-0.0473166	-0.0064304	0.0139053	-0.0956943	-0.0548081	-0.0344724			O75165	DnaJ homolog subfamily C member 13 OS=Homo sapiens GN=DNAJC13 PE=1 SV=5
0.353975	0.550174	0.468734	0.594801	0.723852	0.652675	0.137173	0.266224	0.195047	-0.462431	-0.396551	0.5069	0.206284	0.085063	0.609109	0.323645	0.202424	0.72647	0.288986	0.13484	0.438446	0.579629	0.488853	0.488797	0.292205	0.201429	0.201373			O75167	Phosphatase and actin regulator 2 OS=Homo sapiens GN=PHACTR2 PE=1 SV=2
0.0947013	-0.0958086	-0.200068	0.187396	0.195169	0.117119	0.254454	0.262227	0.184177	0.20344	0.148103	0.155989	0.641412	0.528318	0.491041	0.472235	0.359141	0.321864	-0.000954134	0.163918	0.309642	0.513701	0.661562	0.816942	0.356166	0.504027	0.659407			O75170	Serine/threonine-protein phosphatase 6 regulatory subunit 2 OS=Homo sapiens GN=PPP6R2 PE=1 SV=2
-0.19371	-0.0458482	-0.181126	-0.0926071	0.0405774	-0.00847895	0.047621	0.180805	0.131749	-0.314849	-0.18649	-0.132475	0.0441752	0.11549	-0.00837325	0.255447	0.326761	0.202898	-0.379557	-0.582377	-0.250114	-0.206046	-0.284277	-0.143129	0.19797	0.119739	0.260887	RNA degradation	ko03018	O75175	CCR4-NOT transcription complex subunit 3 OS=Homo sapiens GN=CNOT3 PE=1 SV=1
-0.121837	-0.0281446	0.0425083	0.069038	0.0490803	0.127148	0.104862	0.0849047	0.162972	0.0404718	-0.0814985	0.0173347	0.160112	0.112416	0.196395	0.168009	0.120313	0.204292	0.0017167	-0.000143086	0.104662	0.0585751	0.129939	0.153065	0.0231632	0.0945271	0.117653			O75179	Ankyrin repeat domain-containing protein 17 OS=Homo sapiens GN=ANKRD17 PE=1 SV=3
0.187842	0.212291	0.21464	0.214218	0.227118	0.331604	0.00929367	0.0221937	0.12668	-0.192027	-0.0462605	-0.0692471	-0.105636	-0.113221	-0.138617	-0.00312447	-0.0107095	-0.0361055	-0.241272	-0.184742	-0.184372	-0.506568	-0.188317	-0.300321	-0.303106	0.015145	-0.096859			O75182	Paired amphipathic helix protein Sin3b OS=Homo sapiens GN=SIN3B PE=1 SV=2
0.0550371	-0.0982093	-0.252274	0.238905	0.171802	-0.124397	0.337387	0.270284	-0.0259149	0.25711	0.405164	0.0321835	0.251542	0.418324	0.2012	0.0200562	0.186838	-0.0302858	0.144311	0.00435966	0.148865	0.126455	0.612267	0.151324	0.0272764	0.513088	0.0521454			O75190	DnaJ homolog subfamily B member 6 OS=Homo sapiens GN=DNAJB6 PE=1 SV=2
-0.0326675	-0.313736	-0.00374918	0.612603	-0.143988	-0.00978955	0.729321	-0.0272704	0.106928	-0.0700643	-0.132327	0.13407	-0.0547321	-0.180782	0.0770671	-0.0319583	-0.158008	0.0998409	-0.560171	-0.105385	-0.500351	-0.157914	-0.158934	-0.0542533	0.230722	0.229702	0.334382	Pentose and glucuronate interconversions	ko00040	O75191	Xylulose kinase OS=Homo sapiens GN=XYLB PE=1 SV=3
-0.0178563	-0.065918	-0.0742053	0.374827	0.181337	0.334749	0.427487	0.233997	0.387409	0.129448	0.135876	0.108428	0.13616	0.0851843	0.0462863	0.011576	-0.0393997	-0.0782977	-0.0903723	-0.177109	-0.135644	-0.0801524	0.0442152	-0.0529967	0.0542227	0.17859	0.0813784			O75208	Ubiquinone biosynthesis protein COQ9, mitochondrial OS=Homo sapiens GN=COQ9 PE=1 SV=1
0.00674374	0.170399	-0.132072	-0.0953362	0.127692	-0.150533	-0.11036	0.112668	-0.165557	-0.0355586	0.124396	-0.0324293	0.0603927	-0.0172274	0.0531144	0.04159	-0.0360301	0.0343117	0.0801583	0.0735293	0.127422	-0.0844181	-0.00778916	-0.0717679	-0.178121	-0.101492	-0.165471	Glutathione metabolism	ko00480	O75223	Gamma-glutamylcyclotransferase OS=Homo sapiens GN=GGCT PE=1 SV=1
0.0326287	-0.0145278	-0.0613704	0.327042	0.291819	0.274174	0.341465	0.306242	0.288597	0.391367	0.571999	0.050442	0.58098	0.445284	0.0904657	0.243044	0.107348	-0.24747	0.0780915	-0.0836457	-0.136844	0.0520564	0.0034717	-0.2958	0.0995225	0.0509378	-0.248334	Alzheimer's disease;Huntington's disease;Oxidative phosphorylation;Parkinson's disease	ko00190;ko05010;ko05012;ko05016	O75251	NADH dehydrogenase [ubiquinone] iron-sulfur protein 7, mitochondrial OS=Homo sapiens GN=NDUFS7 PE=1 SV=3
0.209804	0.161457	0.21808	0.372542	0.360891	0.419205	0.176095	0.164444	0.222758	-0.106257	0.0893334	0.0765465	-0.166334	0.119607	0.029804	-0.186208	0.0997327	0.0099297	0.0485453	-0.0292721	0.0439389	0.0684925	0.342244	0.386369	0.0474218	0.321173	0.365298	Alzheimer's disease;Huntington's disease;Oxidative phosphorylation;Parkinson's disease	ko00190;ko05010;ko05012;ko05016	O75306	NADH dehydrogenase [ubiquinone] iron-sulfur protein 2, mitochondrial OS=Homo sapiens GN=NDUFS2 PE=1 SV=2
0.0948605	0.144262	-0.0122514	0.0901309	0.110533	0.0163852	0.0145072	0.0349093	-0.0592385	0.0283123	-0.100681	-0.0419685	-0.030897	-0.0212729	0.0291573	0.0072154	0.0168395	0.0672697	-0.0530471	-0.0571147	0.0412358	-0.085745	-0.0149482	0.0610702	-0.0627697	0.00802713	0.0840455			O75312	Zinc finger protein ZPR1 OS=Homo sapiens GN=ZPR1 PE=1 SV=1
0.0180106	0.364231	0.325523	0.541427	0.718305	0.450447	0.305505	0.482383	0.214525	0.0293779	-0.000145679	0.351634	-0.270584	-0.114283	-0.0618379	-0.397539	-0.241238	-0.188793	-0.0477228	-0.0888798	-0.1766	0.115348	-0.0491132	-0.0304504	0.219749	0.0552877	0.0739505			O75323	Protein NipSnap homolog 2 OS=Homo sapiens GN=GBAS PE=1 SV=1
-0.148544	-0.00777854	-0.0625625	-0.48442	-0.39453	-0.448243	-0.411458	-0.321568	-0.375281	0.124294	0.0601588	0.139122	-0.590028	-0.596366	-0.566054	-0.697886	-0.704224	-0.673912	0.103848	0.0853499	0.218747	-0.435257	-0.340803	-0.297924	-0.571239	-0.476785	-0.433906	ECM-receptor interaction	ko04512	O75330	Hyaluronan mediated motility receptor OS=Homo sapiens GN=HMMR PE=1 SV=2
0.0725883	0.0393508	0.186049	-0.161481	-0.072114	0.0619901	-0.26081	-0.171443	-0.0373393	-0.149909	-0.0700756	-0.112794	-0.235286	-0.202399	-0.241642	-0.12436	-0.0914728	-0.130716	-0.0607603	-0.244212	-0.237063	-0.236859	-0.422336	-0.528342	-0.0561806	-0.241658	-0.347664			O75334	Liprin-alpha-2 OS=Homo sapiens GN=PPFIA2 PE=1 SV=2
0.115364	0.17452	0.310869	0.21139	0.445896	0.399088	0.011139	0.245645	0.198837	-0.109237	0.057534	-0.01401	0.16097	0.210098	0.176029	0.182874	0.232002	0.197933	0.000319422	-0.0809657	0.112674	0.106903	0.104744	0.243839	0.0962271	0.0940681	0.233163			O75340	Programmed cell death protein 6 OS=Homo sapiens GN=PDCD6 PE=1 SV=1
-0.135818	-0.0503666	-0.0125997	0.0453113	0.0789725	0.0644173	0.111573	0.145234	0.130679	0.192591	0.0981487	-0.0706268	0.19377	0.156608	0.122618	0.120399	0.083237	0.049247	-0.0648742	0.0934314	-0.1374	-0.0622793	-0.00652086	-0.224679	-0.0259984	0.0297601	-0.188398			O75347	Tubulin-specific chaperone A OS=Homo sapiens GN=TBCA PE=1 SV=3
0.0760546	0.181742	0.220454	0.413473	0.245783	0.330162	0.254056	0.0863661	0.170745	-0.00955861	0.192648	0.165295	0.309562	0.337564	0.25705	0.193434	0.221436	0.140922	0.00382408	-0.182778	0.0107217	0.0184465	0.0723799	0.0956521	0.0745239	0.128457	0.15173	Collecting duct acid secretion;Epithelial cell signaling in Helicobacter pylori infection;Oxidative phosphorylation;Phagosome;Rheumatoid arthritis;Vibrio cholerae infection	ko00190;ko04145;ko04966;ko05110;ko05120;ko05323	O75348	V-type proton ATPase subunit G 1 OS=Homo sapiens GN=ATP6V1G1 PE=1 SV=3
-0.00627068	0.0996467	-0.07037	0.00276158	0.0194376	0.0629854	-0.00490709	0.0117689	0.0553167	0.0486328	0.211183	0.213728	0.0581436	0.201588	0.223398	-0.0997043	0.0437401	0.0655501	0.148095	0.126689	0.282815	0.278026	0.28827	0.357527	0.0921597	0.102404	0.171661	Endocytosis	ko04144	O75351	Vacuolar protein sorting-associated protein 4B OS=Homo sapiens GN=VPS4B PE=1 SV=2
0.143988	-0.350435	-0.120591	0.152446	-0.110314	-0.187817	0.261459	-0.00130133	-0.0788043	0.102336	-0.123685	-0.0873896	0.01624	-0.0747462	-0.0471784	0.0524862	-0.0385	-0.0109322	-0.0831724	-0.163209	-0.0304446	-0.105416	-0.393656	-0.0622703	-0.0131407	-0.301381	0.030005			O75352	Mannose-P-dolichol utilization defect 1 protein OS=Homo sapiens GN=MPDU1 PE=1 SV=2
1.17885	-0.0284739	0.352434	1.17565	0.00574598	0.644199	0.674713	-0.495191	0.143262	0.218957	-0.418819	-0.313868	0.5335	0.0712219	0.138566	0.704743	0.242465	0.309809	0.313476	0.000918297	0.13714	0.980273	0.783428	0.0771183	0.829762	0.632917	-0.0733931	Purine metabolism;Pyrimidine metabolism	ko00230;ko00240	O75354	Ectonucleoside triphosphate diphosphohydrolase 6 OS=Homo sapiens GN=ENTPD6 PE=1 SV=3
-0.0222216	-0.0650169	-0.21859	0.0384529	-0.469794	-0.261209	0.140396	-0.367851	-0.159266	0.0296107	0.16583	-0.0104782	-0.684999	-0.335764	-0.570288	-0.746653	-0.397418	-0.631942	0.182745	0.106547	0.21207	-0.346116	-0.845066	-0.352132	-0.513237	-1.01219	-0.519253	Purine metabolism;Pyrimidine metabolism	ko00230;ko00240	O75356	Ectonucleoside triphosphate diphosphohydrolase 5 OS=Homo sapiens GN=ENTPD5 PE=1 SV=1
-0.146661	-0.298859	-0.139243	-0.0366255	0.078058	0.0859314	0.158296	0.272979	0.280852	-0.0943078	-0.378887	-0.271696	0.182684	-0.32599	0.0222346	0.430981	-0.0776931	0.270532	-0.202167	-0.29862	-0.203166	0.18491	0.0652629	-0.339648	0.419561	0.299914	-0.104997			O75362	Zinc finger protein 217 OS=Homo sapiens GN=ZNF217 PE=1 SV=1
0.118134	0.0655641	0.076398	0.209763	0.178016	0.180295	0.123064	0.0913173	0.0935963	0.109898	0.107018	0.0696318	0.0319873	0.0783441	-0.0158486	-0.0635286	-0.0171718	-0.111365	0.125102	0.0913774	0.0403545	0.0282387	0.00547438	0.0124116	-0.0573726	-0.0801369	-0.0731997	Systemic lupus erythematosus	ko05322	O75367	Core histone macro-H2A.1 OS=Homo sapiens GN=H2AFY PE=1 SV=4
0.0700368	-0.064293	-0.239153	-0.00918945	0.0486323	-0.0209796	0.0686136	0.126435	0.0568235	-0.0860385	-0.0382641	0.0326041	-0.0338415	0.0541998	0.0352769	-0.00327533	0.084766	0.0658431	0.0295934	0.00964136	-0.0651623	0.0749453	0.271259	0.0441377	0.0835878	0.279902	0.0527802			O75368	SH3 domain-binding glutamic acid-rich-like protein OS=Homo sapiens GN=SH3BGRL PE=1 SV=1
0.0408433	0.0468696	0.112177	0.0083999	-0.0215217	0.00297085	-0.0582301	-0.0881517	-0.0636591	0.0594843	-0.00174469	0.02235	0.169864	0.0765259	0.141213	0.143167	0.0498294	0.114516	0.0511586	0.040973	0.0453375	0.182996	0.160612	0.151798	0.137173	0.114789	0.105975	Focal adhesion;MAPK signaling pathway	ko04010;ko04510	O75369	Filamin-B OS=Homo sapiens GN=FLNB PE=1 SV=2
0.100818	0.302035	0.0354536	-0.422424	-0.284192	-0.447314	-0.568526	-0.430294	-0.593416	-0.252946	-0.0961172	-0.0989465	-0.462198	-0.316112	-0.294504	-0.312861	-0.166775	-0.145167	-0.208597	-0.189151	-0.19983	-0.36418	-0.368928	-0.245481	-0.164987	-0.169735	-0.0462883			O75376	Nuclear receptor corepressor 1 OS=Homo sapiens GN=NCOR1 PE=1 SV=2
0.291722	0.302184	0.183134	0.130915	0.32997	0.308762	-0.128098	0.0709567	0.0497487	0.17878	0.248679	0.0760044	0.141387	0.0693148	0.118343	-0.0264341	-0.0985063	-0.0494781	0.179043	0.0644634	0.100528	0.455141	0.24342	-0.0401206	0.340463	0.128742	-0.154799	Alzheimer's disease;Huntington's disease;Oxidative phosphorylation;Parkinson's disease	ko00190;ko05010;ko05012;ko05016	O75380	NADH dehydrogenase [ubiquinone] iron-sulfur protein 6, mitochondrial OS=Homo sapiens GN=NDUFS6 PE=1 SV=1
-0.157443	-0.100034	-0.097216	-0.0388058	-0.0338045	0.141805	0.0794252	0.0844265	0.260036	0.00363126	-0.250545	-0.105773	0.25253	-0.159144	0.10183	0.370092	-0.0415818	0.219392	-0.158619	-0.219645	-0.132795	0.300037	0.243446	0.0627197	0.47039	0.413799	0.233073	Peroxisome	ko04146	O75381	Peroxisomal membrane protein PEX14 OS=Homo sapiens GN=PEX14 PE=1 SV=1
-0.114389	0.286751	-0.0202708	0.389015	0.340522	0.26694	0.338318	0.289825	0.216243	-0.0803661	-0.0775901	0.0430158	-0.159644	-0.046516	-0.101811	-0.121331	-0.00820253	-0.0634975	0.101817	0.0973468	0.177713	0.135347	0.25416	0.227159	0.0097214	0.128534	0.101533			O75382	Tripartite motif-containing protein 3 OS=Homo sapiens GN=TRIM3 PE=1 SV=2
0.0889843	-0.94493	-0.063284	-0.0260429	-0.912797	0.0795491	0.280367	-0.606387	0.385959	0.637666	0.312878	0.31577	0.776111	0.435067	0.441756	0.354006	0.0129623	0.0196513	0.197064	0.236073	-0.23762	0.660198	0.422286	0.460186	0.595026	0.357114	0.395014	mTOR signaling pathway;Regulation of autophagy	ko04140;ko04150	O75385	Serine/threonine-protein kinase ULK1 OS=Homo sapiens GN=ULK1 PE=1 SV=2
-0.0132873	-0.00130445	-0.191457	0.2416	0.227302	0.21867	0.310283	0.295985	0.287353	-0.0517929	-0.120739	-0.170781	0.221255	-0.00747902	0.0503192	0.335693	0.106959	0.164757	-0.227002	-0.219621	-0.147738	0.360898	0.334744	0.392478	0.559018	0.532864	0.590598	Citrate cycle (TCA cycle);Glyoxylate and dicarboxylate metabolism	ko00020;ko00630	O75390	Citrate synthase, mitochondrial OS=Homo sapiens GN=CS PE=1 SV=2
0.0396218	0.113791	0.109735	0.147127	0.251548	0.297275	0.0594111	0.163832	0.209559	-0.159847	-0.153244	-0.183832	-0.0227293	-0.0354042	-0.00408147	0.142912	0.130237	0.16156	-0.103238	0.0175874	-0.10842	-0.211742	-0.205973	-0.434891	-0.147052	-0.141283	-0.370201			O75391	Sperm-associated antigen 7 OS=Homo sapiens GN=SPAG7 PE=1 SV=2
-0.115887	-0.10906	-0.109208	0.0679485	0.15307	0.0639063	0.179333	0.264455	0.175291	0.0637144	-0.0491687	-0.0335932	0.0520209	0.0312406	-0.142076	0.0583701	0.0375898	-0.135727	0.0518471	-0.02109	0.0191058	0.0874446	-0.0411796	0.0359653	0.0708236	-0.0578006	0.0193443	Phagosome;SNARE interactions in vesicular transport	ko04130;ko04145	O75396	Vesicle-trafficking protein SEC22b OS=Homo sapiens GN=SEC22B PE=1 SV=4
-0.0237939	0.115753	-0.0500764	-0.0541569	0.0352708	0.115964	-0.0681178	0.0213099	0.102003	-0.00975202	0.0339976	0.0673345	-0.0514866	0.011264	0.0389727	-0.0820133	-0.0192627	0.00844601	-0.0354364	0.122647	0.0887705	-0.0561824	-0.0387511	0.0570539	-0.114843	-0.0974115	-0.00160647	Spliceosome	ko03040	O75400	Pre-mRNA-processing factor 40 homolog A OS=Homo sapiens GN=PRPF40A PE=1 SV=2
-0.0148298	0.0579661	0.0962813	-0.0410359	0.0836071	0.0268588	-0.0875084	0.0371346	-0.0196137	0.340675	0.427884	0.296727	0.107312	0.279193	0.15643	-0.247783	-0.0759023	-0.198665	0.18727	0.332015	0.302204	0.326673	0.174368	0.277701	0.0528433	-0.0994617	0.00387133			O75410	Transforming acidic coiled-coil-containing protein 1 OS=Homo sapiens GN=TACC1 PE=1 SV=2
-0.255602	0.28115	0.261167	0.413966	1.14425	1.03389	0.318394	1.04868	0.938318	0.0837979	0.388555	-0.0938571	-0.398786	0.341208	-0.185081	-0.524951	0.215043	-0.311246	0.250839	0.469107	0.146061	0.220792	0.226572	0.0680171	-0.067877	-0.062097	-0.220652	Purine metabolism;Pyrimidine metabolism	ko00230;ko00240	O75414	Nucleoside diphosphate kinase 6 OS=Homo sapiens GN=NME6 PE=1 SV=3
-0.678959	-0.840333	-0.759943	-0.898303	-0.816622	-1.01749	-0.138558	-0.056877	-0.257745	-0.551104	-0.608404	-0.503762	-1.74764	-1.90068	-1.88588	-1.19322	-1.34626	-1.33146	-0.326062	-0.722626	-0.743131	-1.27314	-1.59836	-1.6293	-0.675867	-1.00109	-1.03203	Cell cycle;Cell cycle - yeast;Meiosis - yeast	ko04110;ko04111;ko04113	O75419	Cell division control protein 45 homolog OS=Homo sapiens GN=CDC45 PE=1 SV=1
0.0913884	-0.215973	-0.123126	0.329458	0.408337	0.450257	0.412028	0.490907	0.532827	0.152522	0.147975	-0.0747797	0.154124	0.105225	-0.10062	0.0788849	0.0299859	-0.175859	0.196291	0.0474572	0.254361	0.333135	0.118	0.410619	0.167099	-0.0480364	0.244583			O75420	GRB10-interacting GYF protein 1 OS=Homo sapiens GN=GIGYF1 PE=1 SV=2
0.278836	0.428081	0.335663	0.0277631	0.208865	-0.0343076	-0.319764	-0.138662	-0.381834	0.14276	0.517559	0.50458	-0.571462	-0.341591	-0.250006	-0.959762	-0.729891	-0.638306	0.0338619	0.149397	-0.0801963	-0.938127	-0.955787	-0.808483	-0.972481	-0.990141	-0.842837			O75427	Leucine-rich repeat and calponin homology domain-containing protein 4 OS=Homo sapiens GN=LRCH4 PE=1 SV=2
0.644003	0.258863	0.323936	0.132195	-0.0264558	0.262211	-0.276739	-0.43539	-0.146723	-0.224501	0.144697	0.0989551	-0.0175181	0.125994	-0.102639	-0.0239018	0.11961	-0.109023	0.0253867	-0.0732575	-0.0544118	0.0856038	-0.0768388	-0.1254	0.119698	-0.0427446	-0.0913058			O75431	Metaxin-2 OS=Homo sapiens GN=MTX2 PE=1 SV=1
0.036457	-0.05157	0.0484924	0.115092	-0.0195912	0.126705	0.103966	-0.0307177	0.115579	0.0281008	-0.0132555	-0.0190111	0.0734744	0.0140218	0.0610895	0.074863	0.0154104	0.0624781	-0.0209645	-0.0165377	0.0932005	0.166938	0.0782877	0.189066	0.148372	0.0597216	0.1705			O75436	Vacuolar protein sorting-associated protein 26A OS=Homo sapiens GN=VPS26A PE=1 SV=2
-0.432859	-0.373998	-0.402526	-0.381082	-0.604573	-0.0220482	0.0220457	-0.201445	0.381079	0.290079	0.0280543	-0.0395991	-0.192136	-0.428014	-0.165007	-0.284981	-0.520859	-0.257852	0.138514	0.408692	0.28635	0.226424	0.202158	-0.170353	-0.051428	-0.075694	-0.448205	Alzheimer's disease;Huntington's disease;Oxidative phosphorylation;Parkinson's disease	ko00190;ko05010;ko05012;ko05016	O75438	NADH dehydrogenase [ubiquinone] 1 beta subcomplex subunit 1 OS=Homo sapiens GN=NDUFB1 PE=1 SV=1
0.165386	-0.0780704	0.136585	0.191778	0.153685	0.293339	0.117144	0.0790515	0.218705	0.194953	0.0603579	0.0957507	0.206372	0.0927558	0.108044	0.0893515	-0.0242647	-0.00897653	-0.0583682	0.0262092	-0.0396026	0.253632	0.376181	0.193199	0.277553	0.400102	0.21712			O75439	Mitochondrial-processing peptidase subunit beta OS=Homo sapiens GN=PMPCB PE=1 SV=2
-0.176978	0.020053	-0.147643	-0.289213	-0.311266	-0.603507	-0.18769	-0.209743	-0.501984	0.00208653	0.083859	0.00527686	-0.057551	-0.0338496	-0.224275	-0.0879585	-0.0642571	-0.254682	-0.23984	-0.39238	-0.157856	-0.544917	-0.529135	-0.315273	-0.281558	-0.265776	-0.0519143			O75448	Mediator of RNA polymerase II transcription subunit 24 OS=Homo sapiens GN=MED24 PE=1 SV=1
0.278386	0.299414	0.242949	-0.120928	-0.276263	-0.210352	-0.394511	-0.549846	-0.483935	0.0913337	-0.209385	-0.00928048	0.0212824	-0.111406	-0.0132098	0.0637263	-0.0689621	0.0292341	-0.127161	-0.161213	-0.0487682	-0.143618	-0.243269	-0.0762266	-0.0312373	-0.130888	0.0361541			O75449	Katanin p60 ATPase-containing subunit A1 OS=Homo sapiens GN=KATNA1 PE=1 SV=1
0.272402	-0.513311	-0.07011	0.703562	-0.176772	0.251525	0.807235	-0.073099	0.355198	-0.790226	-1.26758	-0.180223	0.690536	0.281898	0.213066	1.43655	1.02791	0.959076	0.321248	2.48449	-2.13242	0.882171	3.08336	0.408741	0.657732	2.85892	0.184302	Alzheimer's disease;Protein processing in endoplasmic reticulum	ko04141;ko05010	O75460	Serine/threonine-protein kinase/endoribonuclease IRE1 OS=Homo sapiens GN=ERN1 PE=1 SV=2
-0.204912	-0.137852	-0.267023	-0.38317	-0.409883	-0.341294	-0.179908	-0.206621	-0.138032	-0.185239	-0.0224378	-0.0151697	-0.532516	-0.440013	-0.388553	-0.458234	-0.365731	-0.314271	-0.156504	-0.18273	-0.126724	-0.518031	-0.609711	-0.499175	-0.362712	-0.454392	-0.343856			O75475	PC4 and SFRS1-interacting protein OS=Homo sapiens GN=PSIP1 PE=1 SV=1
0.0733925	-0.00152563	-0.00581774	0.132888	0.280233	0.293879	0.110872	0.258217	0.271863	0.170024	0.133044	0.0910243	0.0745477	0.055192	0.103944	-0.0568164	-0.0761721	-0.0274201	0.0597261	0.0534361	0.0778774	0.100278	0.122118	0.0197331	0.0365981	0.0584381	-0.0439468			O75477	Erlin-1 OS=Homo sapiens OX=9606 GN=ERLIN1 PE=1 SV=2
0.0733925	-0.00152563	-0.00581774	0.132888	0.280233	0.293879	0.110872	0.258217	0.271863	0.170024	0.133044	0.0910243	0.0745477	0.055192	0.103944	-0.0568164	-0.0761721	-0.0274201	0.0597261	0.0534361	0.0778774	0.100278	0.122118	0.0197331	0.0365981	0.0584381	-0.0439468			O75477	Erlin-1 OS=Homo sapiens GN=ERLIN1 PE=1 SV=1
0.0285633	0.150748	0.116227	0.258969	0.268175	0.232619	0.160456	0.169662	0.134106	0.121301	0.302783	0.324379	0.0785469	0.299071	0.287624	-0.170941	0.0495833	0.0381363	0.0457962	-0.167809	-0.0986106	0.239079	-0.00843433	0.277429	0.31262	0.0651068	0.35097	Alzheimer's disease;Huntington's disease;Oxidative phosphorylation;Parkinson's disease	ko00190;ko05010;ko05012;ko05016	O75489	NADH dehydrogenase [ubiquinone] iron-sulfur protein 3, mitochondrial OS=Homo sapiens GN=NDUFS3 PE=1 SV=1
0.135988	-0.0205837	0.160228	0.155796	0.0884773	0.265193	0.0639186	-0.00340013	0.173316	0.00265214	-0.060911	0.106466	0.0775894	-0.268125	-0.19955	0.0615204	-0.284194	-0.215619	-0.248397	-0.314353	-0.370859	-0.178689	-0.314452	-0.288585	0.132514	-0.003249	0.022618	Spliceosome	ko03040	O75494	Serine/arginine-rich splicing factor 10 OS=Homo sapiens GN=SRSF10 PE=1 SV=1
-0.0381005	0.0997206	-0.16768	-0.453902	-0.41773	-0.783306	-0.418549	-0.382377	-0.747953	0.269254	0.411154	0.173789	-0.653852	-0.975348	-0.855796	-0.938584	-1.26008	-1.14053	-0.0467543	-0.0690935	0.117413	-0.611794	-0.464479	-0.461732	-0.612316	-0.465001	-0.462254			O75496	Geminin OS=Homo sapiens GN=GMNN PE=1 SV=1
-0.140785	-0.0165714	-0.0263253	-0.0783064	0.0456854	0.253285	-0.0170792	0.106913	0.314512	-0.165387	0.0211848	-0.0840031	-0.190739	0.0512631	-0.114255	-0.114671	0.127332	-0.0381866	0.19476	0.231466	0.149961	0.345925	0.350535	0.163819	0.153863	0.158473	-0.0282433	Lysosome	ko04142	O75503	Ceroid-lipofuscinosis neuronal protein 5 OS=Homo sapiens GN=CLN5 PE=1 SV=2
-0.353429	-0.0556738	0.0282713	-0.0682187	0.114631	0.357921	0.0587251	0.241575	0.484865	0.180719	-0.153962	-0.0760709	0.142797	-0.062931	0.182066	0.159235	-0.046493	0.198504	-0.0216844	-0.0744114	-0.07853	0.0884544	0.277786	0.238969	0.146663	0.335995	0.297178			O75506	Heat shock factor-binding protein 1 OS=Homo sapiens GN=HSBP1 PE=1 SV=1
-0.0399764	-0.0463499	-0.21179	0.153074	0.0249381	-0.0614054	0.252446	0.12431	0.0379667	-0.0274889	-0.0694211	-0.0640847	0.0685411	-0.0622697	0.00508943	0.122206	-0.0086048	0.0587543	0.0337723	0.0640605	-0.112952	0.114945	0.198731	0.0451904	0.119985	0.203771	0.0502301	Fatty acid metabolism;Peroxisome	ko00071;ko04146	O75521	Enoyl-CoA delta isomerase 2, mitochondrial OS=Homo sapiens GN=ECI2 PE=1 SV=4
-0.0476809	0.0420989	0.255114	0.101095	0.325289	0.54101	0.0179177	0.242112	0.457833	-0.0696949	-0.155054	0.207543	-0.149894	-0.0178588	0.239775	-0.144159	-0.0121235	0.24551	-0.157072	-0.383687	-0.378637	0.208835	-0.281706	-0.189533	0.5153	0.0247593	0.116932			O75525	KH domain-containing, RNA-binding, signal transduction-associated protein 3 OS=Homo sapiens GN=KHDRBS3 PE=1 SV=1
-0.227331	-0.0149023	-0.0990048	0.320932	0.200095	-0.0461585	0.434678	0.313841	0.0675875	-0.152154	0.367267	0.231043	-0.216831	-0.0373374	0.0177154	-0.36555	-0.186056	-0.131003	-0.224095	-0.23156	-0.258648	-0.0585346	-0.0392911	-1.25369	0.179566	0.19881	-1.01559			O75528	Transcriptional adapter 3 OS=Homo sapiens GN=TADA3 PE=1 SV=1
-1.06209	-1.11504	-0.902941	0.0372495	0.0735715	0.115152	1.06394	1.10026	1.14184	-0.227911	-0.0234481	-0.212061	-0.272603	-0.586855	-0.13205	-0.11813	-0.432382	0.0224234	0.316376	-0.0117885	-0.0660155	-0.0254366	0.0513815	-0.0368203	-0.104961	-0.0281425	-0.116344	Basal transcription factors	ko03022	O75529	TAF5-like RNA polymerase II p300/CBP-associated factor-associated factor 65 kDa subunit 5L OS=Homo sapiens GN=TAF5L PE=1 SV=1
-0.13965	-0.294784	-0.131798	-0.329109	-0.151806	-0.0849567	-0.140365	0.036938	0.103787	-0.341193	-0.205994	-0.23428	-0.373392	-0.269841	-0.336808	-0.112903	-0.009352	-0.076319	-0.119708	-0.291008	-0.133489	-0.292216	-0.197943	-0.34762	-0.110814	-0.0165413	-0.166218			O75530	Polycomb protein EED OS=Homo sapiens GN=EED PE=1 SV=2
0.0184486	0.0277599	0.0428669	-0.0930198	0.0953596	-0.10479	-0.122712	0.0656678	-0.134482	0.0486629	0.0178774	0.0925245	-0.124029	-0.213039	0.0264301	-0.177051	-0.266061	-0.0265915	-0.081593	-0.000463544	-0.183295	-0.162245	-0.197137	-0.15323	-0.0737945	-0.108686	-0.0647795			O75531	Barrier-to-autointegration factor OS=Homo sapiens GN=BANF1 PE=1 SV=1
0.119364	0.0322274	0.0616109	0.0403694	-0.0297371	-0.00498951	-0.030698	-0.100805	-0.0760569	0.0676658	-0.0499616	-0.0786109	-0.110163	-0.140429	-0.114014	-0.0898608	-0.120127	-0.0937118	-0.0857495	-0.0772771	-0.0908947	-0.252435	-0.255063	-0.304816	-0.167795	-0.170423	-0.220176	Spliceosome	ko03040	O75533	Splicing factor 3B subunit 1 OS=Homo sapiens GN=SF3B1 PE=1 SV=3
0.106763	0.0615666	0.0936519	0.149324	0.199344	0.163809	0.0619968	0.112017	0.0764818	0.0573313	0.0118489	0.0581463	0.168564	0.178679	0.197898	0.126122	0.136237	0.155456	-0.0493228	-0.0408787	-0.0102684	0.10141	0.0815855	0.137783	0.1349	0.115075	0.171273			O75534	Cold shock domain-containing protein E1 OS=Homo sapiens GN=CSDE1 PE=1 SV=2
0.264766	0.00694228	-0.206852	0.0859767	-0.236799	-0.261958	0.0643579	-0.258418	-0.283577	0.0127416	-0.0328299	0.116039	0.0665196	0.0614939	-0.0515211	0.034536	0.0295103	-0.0835047	0.094294	-0.0402061	0.115809	-0.205262	-0.143061	-0.175028	-0.261894	-0.199693	-0.23166			O75554	WW domain-binding protein 4 OS=Homo sapiens GN=WBP4 PE=1 SV=1
0.0148246	-0.153709	-0.100587	0.264743	-0.0284563	-0.0396823	0.344567	0.0513675	0.0401415	0.16749	0.112905	0.135257	0.109757	0.213222	0.155218	-0.0287937	0.0746713	0.0166673	0.205995	0.119958	0.168789	0.300993	0.241944	0.232123	0.136079	0.07703	0.067209			O75569	Interferon-inducible double-stranded RNA-dependent protein kinase activator A OS=Homo sapiens GN=PRKRA PE=1 SV=1
-0.595736	-0.0926802	-0.23695	-0.124208	-0.0315973	-0.239525	0.184247	0.276858	0.0689304	-0.785396	-0.114096	-0.219467	-0.825803	-0.0355789	-0.326534	-0.452817	0.337407	0.0464523	0.0017355	0.144753	0.11	-0.127927	-0.363997	0.0312007	-0.213423	-0.449493	-0.0542955			O75575	DNA-directed RNA polymerase III subunit RPC9 OS=Homo sapiens GN=CRCP PE=1 SV=1
-0.0674893	0.126711	-0.0387576	-0.113937	0.00678617	-0.418644	-0.120758	-3.51967e-05	-0.425465	0.19381	0.236143	0.217058	-0.167858	0.0210565	-0.0103217	-0.383528	-0.194614	-0.225992	0.201333	-0.288026	-0.214696	-0.163919	-0.176225	-0.346603	-0.063456	-0.075762	-0.24614	MAPK signaling pathway;Neurotrophin signaling pathway	ko04010;ko04722	O75582	Ribosomal protein S6 kinase alpha-5 OS=Homo sapiens GN=RPS6KA5 PE=1 SV=1
-0.156388	0.219665	-0.0885178	-0.083407	-0.216133	-0.374135	-0.0749934	-0.207719	-0.365721	-0.237266	-0.248394	0.00515558	-0.501211	-0.543054	-0.472279	-0.341043	-0.382886	-0.312111	-0.0949172	-0.442255	-0.0577739	-0.298037	-0.598735	-0.316032	-0.0997216	-0.40042	-0.117717			O75586	Mediator of RNA polymerase II transcription subunit 6 OS=Homo sapiens GN=MED6 PE=1 SV=2
0.00818004	-0.00878916	-0.0778538	0.151845	-0.0154464	0.0365997	0.177999	0.0107079	0.062754	-0.0147294	-0.0819013	-0.111693	0.17979	0.12332	0.139089	0.249231	0.192761	0.20853	-0.00654229	-0.0412272	0.041313	0.194128	-0.0139833	0.22673	0.19628	-0.0118311	0.228882			O75592	E3 ubiquitin-protein ligase MYCBP2 OS=Homo sapiens GN=MYCBP2 PE=1 SV=3
0.00818004	-0.00878916	-0.0778538	0.151845	-0.0154464	0.0365997	0.177999	0.0107079	0.062754	-0.0147294	-0.0819013	-0.111693	0.17979	0.12332	0.139089	0.249231	0.192761	0.20853	-0.00654229	-0.0412272	0.041313	0.194128	-0.0139833	0.22673	0.19628	-0.0118311	0.228882			O75592	E3 ubiquitin-protein ligase MYCBP2 OS=Homo sapiens OX=9606 GN=MYCBP2 PE=1 SV=4
-0.291246	-0.160984	-0.444575	-0.179266	-0.104652	-0.246449	0.119669	0.194283	0.052486	-0.116007	-0.0299923	0.0746113	-0.198996	-0.105986	-0.176409	-0.1752	-0.08219	-0.152613	-0.289766	-0.211677	-0.0886484	-0.297438	-0.0479923	0.0797512	-0.100741	0.148705	0.276448	Glycine, serine and threonine metabolism	ko00260	O75600	2-amino-3-ketobutyrate coenzyme A ligase, mitochondrial OS=Homo sapiens GN=GCAT PE=1 SV=1
0.0634577	0.030462	0.0843733	0.0848544	-0.0535631	0.0311953	0.0254234	-0.112994	-0.0282357	0.0212974	-0.0812708	-0.0144644	0.22926	0.0216166	0.203214	0.254073	0.0464292	0.228027	-0.0629027	0.0594275	-0.14798	0.14202	0.15779	0.168102	0.192505	0.208275	0.218587			O75607	Nucleoplasmin-3 OS=Homo sapiens GN=NPM3 PE=1 SV=3
-0.177669	-0.388072	-0.274842	0.0100315	0.0961525	0.0762666	0.290226	0.376347	0.356461	-0.0104723	-0.195549	-0.306051	-0.0760298	-0.136567	-0.187382	0.094661	0.0341238	-0.0166912	-0.107817	-0.0293303	-0.0246176	0.188725	0.0975045	0.207738	0.242647	0.151426	0.26166	Glycerophospholipid metabolism	ko00564	O75608	Acyl-protein thioesterase 1 OS=Homo sapiens GN=LYPLA1 PE=1 SV=1
-0.211743	-0.267757	-0.17665	-0.285484	0.00116646	0.252999	-0.0667673	0.219883	0.471716	-0.265897	-0.349174	-0.343366	-0.398971	-0.288954	-0.279591	-0.079492	0.030525	0.039888	-0.495434	0.0657614	-0.536453	0.00163678	0.128795	-0.378308	0.323679	0.450837	-0.0562661			O75616	GTPase Era, mitochondrial OS=Homo sapiens GN=ERAL1 PE=1 SV=2
-0.247687	-0.00229832	-0.0346989	0.00646612	-0.281391	-0.140773	0.101361	-0.186496	-0.0458783	-0.195444	0.115922	0.0482508	-0.157274	0.131103	-0.0102233	-0.14685	0.141527	0.000200433	0.137951	0.193798	0.0661419	0.414202	0.256238	0.412941	0.281572	0.123608	0.280311			O75629	Protein CREG1 OS=Homo sapiens GN=CREG1 PE=1 SV=1
0.0277319	0.0236895	0.0357728	-0.0213044	-0.0257522	-0.0509662	-0.0503691	-0.0548169	-0.0800309	0.0365343	-0.00266531	0.0560137	0.0572337	0.0105646	0.0314411	0.0272728	-0.0193963	0.0014802	0.0224415	0.00236469	6.72133e-06	-0.0661724	-0.0890203	-0.05214	-0.0744434	-0.0972913	-0.060411	Spliceosome	ko03040	O75643	U5 small nuclear ribonucleoprotein 200 kDa helicase OS=Homo sapiens GN=SNRNP200 PE=1 SV=2
-1.36979	-1.48616	-1.35052	-0.793672	-0.704522	-0.837794	0.608485	0.697635	0.564363	-0.662731	-0.510597	-0.514991	-0.481265	-0.426022	-0.259686	0.081508	0.136751	0.303087	-0.320763	-0.465611	-0.152138	-0.185769	-0.0796277	-0.203325	0.127068	0.23321	0.109512	Sulfur relay system	ko04122	O75648	Mitochondrial tRNA-specific 2-thiouridylase 1 OS=Homo sapiens GN=TRMU PE=1 SV=2
0.161673	0.0606723	0.0903089	0.161877	0.0381985	-0.00839219	0.0576589	-0.0660196	-0.11261	0.0139104	-0.0712676	0.011062	0.118558	0.0480426	0.225984	0.13399	0.0634743	0.241416	-0.0884565	-0.0188317	0.103939	0.09999	0.22849	0.347088	0.101106	0.229606	0.348204			O75663	TIP41-like protein OS=Homo sapiens GN=TIPRL PE=1 SV=2
0.0545024	0.230073	0.104662	0.205763	0.225405	0.0585633	0.0760172	0.0956592	-0.0711825	-0.194365	0.0156512	-0.0879254	-0.143187	-0.11537	-0.107793	-0.0543073	-0.0264903	-0.0189133	-0.208033	0.0675409	-0.00280004	0.00930431	0.142572	-0.0551361	0.0570684	0.190336	-0.00737205			O75674	TOM1-like protein 1 OS=Homo sapiens GN=TOM1L1 PE=1 SV=2
-0.518775	-0.388505	-0.662486	-0.0482697	-0.523683	-0.676473	0.474986	-0.000427667	-0.153218	-0.991792	-1.05475	-0.839103	-1.03717	-0.50694	-1.05242	-0.0752883	0.454942	-0.0905383	-1.30457	-1.60613	0.00258902	-0.527596	-0.527725	-0.0840713	0.441774	0.441645	0.885299	MAPK signaling pathway;Neurotrophin signaling pathway	ko04010;ko04722	O75676	Ribosomal protein S6 kinase alpha-4 OS=Homo sapiens GN=RPS6KA4 PE=1 SV=1
0.119968	0.359393	0.194607	0.0705021	0.16356	0.128981	-0.154154	-0.061096	-0.095675	0.251337	0.181167	0.193583	0.21043	0.249344	0.320085	0.00173433	0.0406483	0.111389	0.0374455	-0.101847	0.172263	-0.103128	-0.0764183	0.0138517	-0.139082	-0.112372	-0.0221021			O75683	Surfeit locus protein 6 OS=Homo sapiens GN=SURF6 PE=1 SV=3
-0.176152	-0.093745	-0.10481	-0.0949152	-0.17809	-0.361157	0.0299871	-0.0531877	-0.236255	0.465208	0.213326	-0.0136351	0.445289	-0.101227	0.0150576	0.223656	-0.32286	-0.206575	-0.356196	0.035626	0.120368	0.108378	-0.0135485	-0.069524	0.175112	0.0531855	-0.00279	MAPK signaling pathway	ko04010	O75688	Protein phosphatase 1B OS=Homo sapiens GN=PPM1B PE=1 SV=1
-0.0895737	-0.228613	-0.191855	-0.0508767	-0.132828	-0.032479	0.119137	0.0371859	0.137535	-0.225213	-0.231979	-0.270172	-0.0615928	-0.137968	-0.132627	0.180862	0.104487	0.109828	-0.293611	-0.30744	-0.181171	-0.238843	-0.329533	-0.0651366	0.0218977	-0.0687923	0.195604			O75691	Small subunit processome component 20 homolog OS=Homo sapiens GN=UTP20 PE=1 SV=3
-0.0540697	-0.0288404	-0.0446301	-0.191967	-0.191845	-0.334944	-0.149454	-0.149332	-0.292431	-0.143348	-0.0821358	-0.116448	-0.370008	-0.24562	-0.40436	-0.256031	-0.131643	-0.290383	0.00742754	0.0574734	0.0226411	-0.271339	-0.224238	-0.221805	-0.30052	-0.253419	-0.250986	RNA transport	ko03013	O75694	Nuclear pore complex protein Nup155 OS=Homo sapiens GN=NUP155 PE=1 SV=1
0.435545	0.136181	0.213672	0.597748	0.278376	0.140692	0.335949	0.0165767	-0.121107	0.345542	0.217786	0.266261	0.2653	0.154435	0.379824	-0.0112297	-0.122095	0.103294	0.105088	0.134887	0.101334	-0.0956721	-0.0441068	-0.0860394	-0.209442	-0.157876	-0.199809			O75695	Protein XRP2 OS=Homo sapiens GN=RP2 PE=1 SV=4
-0.487578	-0.523352	-0.425707	-0.569314	-0.594915	-0.527325	-0.090435	-0.116036	-0.048446	-0.117857	-0.201395	-0.190328	-0.446837	-0.402533	-0.305586	-0.276977	-0.232673	-0.135726	-0.0591558	0.0576073	-0.0339369	-0.173914	-0.254814	-0.268695	-0.162086	-0.242986	-0.256867			O75717	WD repeat and HMG-box DNA-binding protein 1 OS=Homo sapiens GN=WDHD1 PE=1 SV=1
-0.041399	0.00149692	-0.0128543	-0.04624	0.182893	0.00164075	-0.0286545	0.200478	0.0192262	-0.0692415	0.264876	0.133504	0.00395108	0.167798	0.0168625	-0.105762	0.0580852	-0.0928503	-0.210374	-0.0304643	-0.0619529	-0.157448	0.0319408	-0.244019	-0.0565176	0.132871	-0.143089			O75718	Cartilage-associated protein OS=Homo sapiens GN=CRTAP PE=1 SV=1
-0.450964	-0.139218	-0.092802	-0.337608	-0.0848931	0.109053	-0.109947	0.142768	0.336714	0.0582171	-0.141939	-0.195098	-0.165211	-0.231509	-0.282207	-0.072271	-0.138569	-0.189267	-0.0457625	0.0188625	-0.022018	0.0780606	0.00578004	0.0409186	0.0943666	0.022086	0.0572246			O75746	Calcium-binding mitochondrial carrier protein Aralar1 OS=Homo sapiens GN=SLC25A12 PE=1 SV=2
-0.209029	-0.26566	-0.362679	-0.144195	-0.0380496	-0.136844	0.134928	0.241073	0.142279	-0.0476919	0.0573669	-0.121596	-0.112239	-0.0386294	-0.0616336	-0.074932	-0.0013224	-0.0243266	-0.241564	0.0361977	-0.0925026	0.0709738	0.00117929	-0.216283	0.170263	0.100469	-0.116993			O75787	Renin receptor OS=Homo sapiens GN=ATP6AP2 PE=1 SV=2
0.209577	0.180371	0.175799	-0.239332	-0.299626	0.0561212	-0.427914	-0.488208	-0.132461	0.259366	0.198902	0.158362	-0.376833	-0.278126	-0.437442	-0.582376	-0.483669	-0.642985	0.0514953	-0.067891	0.194863	-0.521017	-0.372669	-0.357412	-0.580506	-0.432158	-0.416901	DNA replication	ko03030	O75792	Ribonuclease H2 subunit A OS=Homo sapiens GN=RNASEH2A PE=1 SV=2
-0.252172	-0.254606	-0.24667	-0.112525	-0.260331	-0.213062	0.138624	-0.00918167	0.0380873	-0.244865	-0.189416	-0.338359	-0.221605	-0.18752	-0.241059	0.0359417	0.0700267	0.0164877	0.0867365	-0.0566475	-0.311219	-0.0996199	-0.14079	-0.467169	-0.0059099	-0.04708	-0.373459			O75794	Cell division cycle protein 123 homolog OS=Homo sapiens GN=CDC123 PE=1 SV=1
-0.00890166	-0.126732	-0.148875	-0.0143569	-0.123067	-0.0749995	0.0804793	-0.0282308	0.0198367	0.0909735	-0.0532584	-0.0348883	-0.347526	-0.393956	-0.357551	-0.348468	-0.394898	-0.358493	0.0770079	0.0791193	0.236539	-0.481419	-0.462481	-0.446405	-0.612308	-0.59337	-0.577294	Ascorbate and aldarate metabolism;Drug metabolism - cytochrome P450;Drug metabolism - other enzymes;Metabolism of xenobiotics by cytochrome P450;Other types of O-glycan biosynthesis;Pentose and glucuronate interconversions;Porphyrin and chlorophyll metabolism;Retinol metabolism;Starch and sucrose metabolism;Steroid hormone biosynthesis	ko00040;ko00053;ko00140;ko00500;ko00514;ko00830;ko00860;ko00980;ko00982;ko00983	O75795	UDP-glucuronosyltransferase 2B17 OS=Homo sapiens GN=UGT2B17 PE=1 SV=1
-0.284971	-0.411336	0.142009	0.0578676	0.00208109	-0.3528	0.242634	0.186847	-0.168034	-0.171064	0.0161339	-0.0217833	-0.251148	-0.0350139	-0.37733	-0.192244	0.0238906	-0.318426	-0.0228965	-0.130477	-0.0461417	-0.189246	-0.198902	-0.318429	-0.122741	-0.132397	-0.251924	Ribosome biogenesis in eukaryotes;RNA transport	ko03008;ko03013	O75817	Ribonuclease P protein subunit p20 OS=Homo sapiens GN=POP7 PE=1 SV=2
-0.0506497	0.149131	-0.039767	0.0155237	0.203898	-0.153044	-0.00404773	0.184327	-0.172615	0.0363764	-0.168106	-0.132228	-0.144451	0.0457686	-0.256964	-0.0564651	0.133754	-0.168978	0.0905295	-0.178033	0.177265	0.0263949	-0.0075206	0.158423	-0.0035256	-0.0374411	0.128503	Ribosome biogenesis in eukaryotes;RNA transport	ko03008;ko03013	O75818	Ribonuclease P protein subunit p40 OS=Homo sapiens GN=RPP40 PE=1 SV=3
-0.100259	-0.258315	-0.215833	-0.0900867	-0.197298	-0.190257	0.101382	-0.005829	0.001212	-0.000645366	-0.122607	-0.0244587	-0.136469	-0.162634	-0.0944289	-0.087232	-0.113397	-0.0451919	-0.0766888	-0.164188	-0.0174765	-0.0758172	-0.226972	-0.259815	0.0103006	-0.140854	-0.173697	RNA transport	ko03013	O75821	Eukaryotic translation initiation factor 3 subunit G OS=Homo sapiens GN=EIF3G PE=1 SV=2
-0.245916	-0.092173	-0.357942	-0.0806298	0.071022	0.00813733	0.151381	0.303032	0.240148	-0.402707	-0.0725438	-0.189848	-0.326535	0.0272606	-0.19314	-0.104835	0.24896	0.0285596	-0.11417	-0.0896144	-0.157347	-0.153793	-0.00299514	-0.0520106	-0.0334159	0.117382	0.0683665	RNA transport	ko03013	O75822	Eukaryotic translation initiation factor 3 subunit J OS=Homo sapiens GN=EIF3J PE=1 SV=2
0.227282	0.135759	-0.0910631	-0.30164	-0.90117	-0.7779	-0.392299	-0.991829	-0.868559	0.221122	-0.159271	-0.0945325	-0.0711317	-0.232236	-0.397344	-0.0602379	-0.221342	-0.38645	-0.179462	-0.125459	-0.00223228	-0.423467	-0.106076	-0.0397954	-0.321083	-0.00369157	0.062589	Arachidonic acid metabolism	ko00590	O75828	Carbonyl reductase [NADPH] 3 OS=Homo sapiens GN=CBR3 PE=1 SV=3
0.0118722	-0.0305507	-0.0909716	-0.0694139	0.071136	-0.0927904	-0.0328639	0.107686	-0.0562404	-0.146368	-0.0781828	-0.0261901	-0.245493	0.0416136	-0.012449	-0.161913	0.125194	0.0711313	-0.085671	-0.0185841	-0.0773036	0.11841	0.12036	0.0335846	0.17893	0.18088	0.0941042			O75832	26S proteasome non-ATPase regulatory subunit 10 OS=Homo sapiens GN=PSMD10 PE=1 SV=1
-0.114919	-0.0510673	-0.249877	-0.0842358	0.0482473	-0.10556	0.0543853	0.186868	0.0330611	0.00672208	-0.334227	-0.151903	0.0899855	0.0274068	-0.0546567	0.249788	0.187209	0.105146	-0.0480209	-0.269159	-0.14029	-0.00257771	-0.143975	-0.0766835	0.149912	0.00851497	0.0758065			O75843	AP-1 complex subunit gamma-like 2 OS=Homo sapiens GN=AP1G2 PE=1 SV=1
-0.135831	-0.138367	-0.0716932	0.0435104	0.0722902	0.0904515	0.158807	0.187587	0.205749	-0.117253	-0.0386166	-0.0624034	0.0536277	0.100816	0.0185148	0.126385	0.173574	0.0912725	-0.229185	-0.144651	-0.177237	0.0390424	-0.22529	0.0332909	0.222733	-0.041599	0.216982			O75844	CAAX prenyl protease 1 homolog OS=Homo sapiens GN=ZMPSTE24 PE=1 SV=2
-0.442323	-0.438981	-0.263972	0.520359	0.400374	0.330969	0.902118	0.782133	0.712728	1.29345	0.0966844	0.0265856	1.70137	1.12286	1.34963	1.22913	0.65062	0.87739	0.134366	0.104734	-0.066764	0.376851	0.347339	0.181147	0.319406	0.289894	0.123702			O75864	Protein phosphatase 1 regulatory subunit 37 OS=Homo sapiens GN=PPP1R37 PE=1 SV=4
-0.0926012	-0.113876	-0.159429	-0.108449	-0.00146297	-0.134265	0.0135197	0.120506	-0.0122963	0.0864554	0.0700554	0.122358	0.112653	0.242974	0.250304	0.0196967	0.150018	0.157348	0.252167	0.198933	0.145587	0.363362	0.265347	0.291846	0.164466	0.0664513	0.0929503	Carbon fixation pathways in prokaryotes;Citrate cycle (TCA cycle);Glutathione metabolism;Peroxisome	ko00020;ko00480;ko00720;ko04146	O75874	Isocitrate dehydrogenase [NADP] cytoplasmic OS=Homo sapiens GN=IDH1 PE=1 SV=2
0.116266	-0.16401	-0.0139884	0.174184	0.24165	0.0432078	0.194761	0.262227	0.0637853	-0.324023	0.0629623	-0.0264353	-0.494982	0.171792	-0.241396	-0.39915	0.267624	-0.145564	-0.119799	-0.207167	-0.31462	0.0964595	-0.120199	-0.136605	0.310322	0.093663	0.077257			O75879	Glutamyl-tRNA(Gln) amidotransferase subunit B, mitochondrial OS=Homo sapiens GN=GATB PE=1 SV=1
-0.519519	-0.430928	-0.27676	-0.618718	-0.381219	-0.338426	-0.209649	0.02785	0.070643	-0.294396	-0.197652	-0.132585	-0.338579	-0.343591	-0.290606	-0.130368	-0.13538	-0.082395	-0.384382	-0.385224	-0.500829	-0.323788	-0.427982	-0.46314	0.0996903	-0.00450367	-0.0396617			O75880	Protein SCO1 homolog, mitochondrial OS=Homo sapiens GN=SCO1 PE=1 SV=1
-0.347763	-0.126967	-0.156123	-0.132865	0.116569	0.0893157	0.0774193	0.326853	0.2996	-0.122059	-0.353323	-0.405349	0.170855	0.254585	0.161472	0.464432	0.548162	0.455049	-0.105906	0.0516175	0.0285573	0.356867	0.480017	0.382677	0.365444	0.488594	0.391254			O75882	Attractin OS=Homo sapiens GN=ATRN PE=1 SV=2
0.0415783	0.146448	0.0397996	-0.0742986	-0.0858661	-0.159926	-0.150241	-0.161808	-0.235868	-0.033357	-0.0164103	-0.0531035	0.150669	0.198751	0.0900795	0.184959	0.233041	0.12437	0.134071	0.188912	0.0170739	0.155698	0.172645	0.158829	0.0423457	0.0592927	0.0454767			O75884	Putative hydrolase RBBP9 OS=Homo sapiens GN=RBBP9 PE=1 SV=2
-0.0731978	-0.297566	-0.386386	0.227614	0.268049	0.0959317	0.479997	0.520432	0.348315	-0.268322	-0.0854471	-0.132371	-0.0830362	-0.206413	-0.021638	0.0790105	-0.0443663	0.140409	-0.133444	-0.226818	-0.0986227	-0.47148	-0.402065	-0.334955	-0.318518	-0.249103	-0.181993	Endocytosis;Jak-STAT signaling pathway	ko04144;ko04630	O75886	Signal transducing adapter molecule 2 OS=Homo sapiens GN=STAM2 PE=1 SV=1
-0.304155	-0.480854	-0.939326	0.0721223	0.033629	0.135487	0.646901	0.608407	0.710265	-0.135246	-0.1566	-0.0966359	-0.168996	-0.0990195	-0.16157	-0.039502	0.0304745	-0.032076	0.0103563	-0.313783	0.194207	0.150555	-0.104592	0.32819	0.186962	-0.0681854	0.364597	Fat digestion and absorption;Glycerolipid metabolism;Retinol metabolism	ko00561;ko00830;ko04975	O75907	Diacylglycerol O-acyltransferase 1 OS=Homo sapiens GN=DGAT1 PE=1 SV=2
0.0843806	-0.0738077	-0.0319276	-0.0576175	-0.124341	-0.0439058	-0.0504993	-0.117223	-0.0367876	-0.170951	0.120979	-0.148749	-0.0119096	0.015415	-0.0108478	0.0543307	0.0816553	0.0553925	-0.160796	-0.168192	-0.145518	-0.205733	-0.153345	-0.328149	-0.0475643	0.00482367	-0.16998			O75909	Cyclin-K OS=Homo sapiens GN=CCNK PE=1 SV=2
0.124287	-0.0869707	0.0755071	-0.214374	-0.267095	-0.300897	-0.251982	-0.304703	-0.338505	0.390925	0.160492	0.292559	0.0226452	-0.119323	0.0929164	-0.25868	-0.400648	-0.188409	0.102519	-0.127957	0.132221	-0.138155	-0.216614	-0.0205152	-0.173749	-0.252208	-0.0561095			O75915	PRA1 family protein 3 OS=Homo sapiens GN=ARL6IP5 PE=1 SV=1
0.105939	0.0837742	0.172804	-0.294695	-0.159369	-0.0487814	-0.415534	-0.280208	-0.16962	-0.0652982	-0.128068	-0.0446443	-0.393415	-0.600377	-0.386826	-0.314078	-0.52104	-0.307489	0.162525	0.114494	0.0742548	-0.343097	-0.523012	-0.595362	-0.460188	-0.640103	-0.712453	Hepatitis C;Jak-STAT signaling pathway;Pathways in cancer;Small cell lung cancer;Ubiquitin mediated proteolysis	ko04120;ko04630;ko05160;ko05200;ko05222	O75928	E3 SUMO-protein ligase PIAS2 OS=Homo sapiens GN=PIAS2 PE=1 SV=3
-0.0562293	-0.0505539	0.122562	-0.0921583	-0.101158	0.0429915	-0.0974179	-0.106418	0.0377319	-0.0588934	-0.0691714	-0.0693996	-0.10658	-0.0924299	0.0240237	-0.0407585	-0.0266084	0.0898452	-0.0181256	-0.108872	-0.178806	-0.176654	-0.269616	-0.153972	-0.0747195	-0.167681	-0.0520375	Spliceosome	ko03040	O75934	Pre-mRNA-splicing factor SPF27 OS=Homo sapiens GN=BCAS2 PE=1 SV=1
-0.0380631	-0.212622	0.0763315	-0.0396027	-0.0807717	0.135569	0.0185152	-0.0226538	0.193687	-0.025102	-0.156441	-0.330358	0.0195981	-0.281839	-0.234648	0.190232	-0.111205	-0.0640143	0.156137	0.0860553	0.12883	0.113015	0.00296832	0.0622164	-0.0106591	-0.120706	-0.0614577			O75935	Dynactin subunit 3 OS=Homo sapiens GN=DCTN3 PE=1 SV=1
0.0424031	0.249107	0.118171	-0.00627886	0.116463	0.113781	-0.142839	-0.0200974	-0.0227794	0.0512719	0.198598	0.176739	0.131962	0.25838	0.262261	-0.010241	0.116177	0.120058	0.0397567	-0.037186	0.109548	0.0564454	-0.00751577	-0.132379	0.0190725	-0.0448887	-0.169752			O75937	DnaJ homolog subfamily C member 8 OS=Homo sapiens GN=DNAJC8 PE=1 SV=2
-0.163913	-0.0575751	-0.117635	-0.018244	0.15087	0.0786309	0.094797	0.263911	0.191672	-0.0862353	-0.063458	-0.103126	0.0225096	-0.0412446	-0.0289564	0.106783	0.0430285	0.0553167	-0.10571	-0.146812	-0.351674	-0.259092	-0.362512	-0.254703	-0.0576933	-0.161113	-0.0533043	Spliceosome	ko03040	O75940	Survival of motor neuron-related-splicing factor 30 OS=Homo sapiens GN=SMNDC1 PE=1 SV=1
0.307538	0.0969908	0.205364	-0.12335	-0.0541439	0.128637	-0.326648	-0.257441	-0.0746606	-0.067807	0.11114	0.033472	-0.226011	-0.117592	-0.0322291	-0.251613	-0.143194	-0.0578308	0.0492538	0.233061	0.201969	-0.0419434	0.0738532	0.0204278	-0.203371	-0.0875747	-0.141	Cell cycle - yeast;Meiosis - yeast	ko04111;ko04113	O75943	Cell cycle checkpoint protein RAD17 OS=Homo sapiens GN=RAD17 PE=1 SV=2
0.0479829	-0.0215633	-0.149274	0.0896907	0.0664413	0.0153225	0.130642	0.107393	0.056274	0.128837	0.179067	0.0891961	0.0170945	-0.0926732	-0.0432157	-0.115272	-0.22504	-0.175582	-0.0209959	-0.0234693	-0.0878998	0.0292107	-0.0612728	-0.14671	0.0733324	-0.0171511	-0.102588	Alzheimer's disease;Huntington's disease;Oxidative phosphorylation;Parkinson's disease	ko00190;ko05010;ko05012;ko05016	O75947	ATP synthase subunit d, mitochondrial OS=Homo sapiens GN=ATP5H PE=1 SV=3
0.0902539	-0.0131498	-0.122773	0.203684	0.00798031	0.0395499	0.218907	0.0232033	0.0547729	0.187269	0.0610587	0.00744727	-0.00946996	-0.0343352	-0.124624	-0.0947283	-0.119594	-0.209882	0.0108545	0.0682275	0.192677	-0.135706	-0.0512419	6.99636e-05	-0.226292	-0.141828	-0.0905164	Insulin signaling pathway	ko04910	O75955	Flotillin-1 OS=Homo sapiens GN=FLOT1 PE=1 SV=3
-0.00128434	-0.0756437	-0.0970513	0.0822007	-0.00898647	-0.0465727	0.140194	0.0490066	0.0114204	-0.00439881	-0.09221	-0.0374073	0.17674	0.0422369	0.0846307	0.221412	0.0869089	0.129303	0.00748623	-0.0743943	0.010025	0.139875	0.0523925	0.112427	0.158836	0.0713535	0.131388			O75962	Triple functional domain protein OS=Homo sapiens GN=TRIO PE=1 SV=2
-0.17231	-0.213093	-0.200706	0.0704059	-0.100908	-0.0927324	0.265776	0.0944617	0.102637	0.171101	0.109133	-0.369048	-0.173968	-0.0508312	-0.649896	-0.144363	-0.0212265	-0.620291	-0.219556	-0.0847221	-0.0709988	-0.236601	0.192535	0.0333227	-0.111509	0.317627	0.158415	Oxidative phosphorylation	ko00190	O75964	ATP synthase subunit g, mitochondrial OS=Homo sapiens GN=ATP5L PE=1 SV=3
-0.246232	-0.127252	-0.202462	0.239123	0.607739	0.245833	0.431105	0.799721	0.437815	0.320485	0.43635	0.505364	0.561887	0.677343	0.511662	0.141154	0.25661	0.090929	0.25256	0.252136	0.191562	0.616071	0.547	0.549063	0.383985	0.314914	0.316977	Tight junction	ko04530	O75970	Multiple PDZ domain protein OS=Homo sapiens GN=MPDZ PE=1 SV=2
-0.328738	-0.191513	-0.143638	-0.407232	-0.372801	-0.384642	-0.185936	-0.151505	-0.163346	-0.134818	-0.0926284	-0.106876	-0.400238	-0.391492	-0.318147	-0.288797	-0.280051	-0.206706	-0.0454315	-0.10705	-0.0415931	-0.409282	-0.408718	-0.496078	-0.34459	-0.344026	-0.431386			O75976	Carboxypeptidase D OS=Homo sapiens GN=CPD PE=1 SV=2
-0.0108013	-0.239897	-0.123703	-0.176809	-0.212904	-0.163018	-0.0520086	-0.0881036	-0.0382176	-0.23288	-0.118413	-0.0623424	-0.232691	-0.161031	-0.0952317	-0.0948125	-0.0231525	0.0426468	-0.0580674	-0.0128985	-0.0591627	-0.237014	-0.239256	-0.297903	-0.193638	-0.19588	-0.254527			O76003	Glutaredoxin-3 OS=Homo sapiens GN=GLRX3 PE=1 SV=2
0.118063	0.352395	0.165938	0.208691	0.34261	0.266921	-0.003441	0.130478	0.054789	0.131349	0.0455651	0.00348395	0.42411	0.381567	0.360087	0.363977	0.321434	0.299954	0.219646	0.112014	0.0898053	0.484648	0.326493	0.291621	0.34416	0.186005	0.151133			O76021	Ribosomal L1 domain-containing protein 1 OS=Homo sapiens GN=RSL1D1 PE=1 SV=3
-0.020208	-0.166956	0.0707706	0.288282	0.434491	0.319386	0.32708	0.473289	0.358184	-0.0109935	0.182428	0.354553	0.081855	0.288481	0.166557	-0.0934742	0.113152	-0.00877217	0.402643	0.228182	0.1093	0.588721	0.28798	0.216958	0.342013	0.0412717	-0.0297503	Protein processing in endoplasmic reticulum	ko04141	O76024	Wolframin OS=Homo sapiens GN=WFS1 PE=1 SV=2
0.111319	-0.0283906	-0.0221011	0.554632	0.339449	0.399119	0.534356	0.319173	0.378843	-0.00293119	-0.0648676	-0.0465381	0.250788	0.0550668	0.0771999	0.2889	0.0931791	0.115312	-0.293626	-0.311053	-0.282863	0.133713	0.0297394	0.183813	0.42956	0.325587	0.47966	Cell cycle - Caulobacter	ko04112	O76031	ATP-dependent Clp protease ATP-binding subunit clpX-like, mitochondrial OS=Homo sapiens GN=CLPX PE=1 SV=2
0.13924	-0.165462	-0.123446	0.213356	-0.109762	0.0426129	0.263245	-0.0598727	0.0925022	0.261251	-0.29567	-0.294911	0.27562	-0.223128	-0.217618	0.385397	-0.113351	-0.107841	-0.201281	-0.136143	-0.113619	-0.0524222	-0.352296	-0.0777609	0.0979255	-0.201948	0.0725868			O76054	SEC14-like protein 2 OS=Homo sapiens GN=SEC14L2 PE=1 SV=1
-0.136436	0.238533	0.182775	0.152683	0.44276	0.308075	0.0577257	0.347803	0.213118	-0.291287	0.17869	-0.0126318	-0.385239	0.258067	0.137243	-0.343496	0.29981	0.178986	0.350287	0.268559	0.159093	0.566772	0.491026	0.467674	0.307459	0.231713	0.208361	Steroid biosynthesis	ko00100	O76062	Delta(14)-sterol reductase OS=Homo sapiens GN=TM7SF2 PE=2 SV=3
-0.0480126	-0.0258297	0.0542291	0.00755959	0.102787	0.0512859	0.0140973	0.109325	0.0578236	0.0467468	-0.0719127	-0.0845673	0.125329	0.035814	-0.0208317	0.161907	0.0723917	0.015746	0.113154	0.0939374	-0.0718536	0.063866	0.0370031	-0.215414	0.0187867	-0.00807617	-0.260493			O76071	Probable cytosolic iron-sulfur protein assembly protein CIAO1 OS=Homo sapiens GN=CIAO1 PE=1 SV=1
-0.162652	0.0337727	-0.0556774	-0.0734895	0.203206	0.235869	-0.0119706	0.264725	0.297388	0.27804	-0.0232384	-0.0259224	0.441089	0.18513	0.0675163	0.364796	0.108837	-0.00877677	-0.130538	0.407933	0.296079	0.054309	0.271078	0.281306	-0.136849	0.07992	0.090148	Apoptosis	ko04210	O76075	DNA fragmentation factor subunit beta OS=Homo sapiens GN=DFFB PE=1 SV=1
-0.0272363	-0.130388	0.110628	0.236696	0.0793072	0.403903	0.252361	0.0949726	0.419568	0.0614588	0.0431014	-0.1096	0.482992	0.353635	0.439679	0.484672	0.355315	0.441359	-0.0300932	0.0212361	-0.0794113	0.201062	0.184572	0.127114	0.230485	0.213995	0.156537			O76080	AN1-type zinc finger protein 5 OS=Homo sapiens GN=ZFAND5 PE=1 SV=1
-0.0754814	0.0676564	0.0981831	-0.132056	-0.0471085	-0.0453517	-0.162175	-0.0772279	-0.0754711	-0.0385615	-0.0537427	0.0244153	0.120227	0.034699	0.152335	0.142857	0.0573286	0.174965	0.0910635	0.135022	0.0970537	0.141486	0.152414	0.0613106	0.0337729	0.0447009	-0.0464025	Protein export	ko03060	O76094	Signal recognition particle subunit SRP72 OS=Homo sapiens GN=SRP72 PE=1 SV=3
0.104588	0.113823	0.101717	-0.0562011	-0.0440016	-0.169325	-0.16291	-0.150711	-0.276034	0.00513501	0.0696594	-0.028594	-0.30303	-0.231668	-0.325178	-0.31843	-0.247068	-0.340578	0.117639	0.116373	0.173873	-0.172988	-0.0975416	-0.164714	-0.30895	-0.233503	-0.300676			O94760	N(G),N(G)-dimethylarginine dimethylaminohydrolase 1 OS=Homo sapiens GN=DDAH1 PE=1 SV=3
-0.168462	-0.17849	0.140648	-0.315485	-0.0426828	-0.309154	-0.246717	0.0260852	-0.240386	0.087216	0.4138	0.439527	-0.641073	-0.449501	-1.06231	-0.954587	-0.763015	-1.37582	0.166201	0.323931	-0.131291	-0.490729	-0.666492	-0.79716	-0.610343	-0.786106	-0.916774			O94761	ATP-dependent DNA helicase Q4 OS=Homo sapiens OX=9606 GN=RECQL4 PE=1 SV=2
-0.168462	-0.17849	0.140648	-0.315485	-0.0426828	-0.309154	-0.246717	0.0260852	-0.240386	0.087216	0.4138	0.439527	-0.641073	-0.449501	-1.06231	-0.954587	-0.763015	-1.37582	0.166201	0.323931	-0.131291	-0.490729	-0.666492	-0.79716	-0.610343	-0.786106	-0.916774			O94761	ATP-dependent DNA helicase Q4 OS=Homo sapiens GN=RECQL4 PE=1 SV=1
0.216452	0.115167	-0.00230441	0.0388768	-0.0232072	0.0467175	-0.0708947	-0.132979	-0.063054	-0.0750803	0.44693	-0.237073	-0.18018	0.229957	-0.444538	-0.225106	0.185031	-0.489464	0.255756	0.0170416	0.0489636	-0.0188815	0.10917	-0.0737547	-0.126135	0.00191627	-0.181008			O94762	ATP-dependent DNA helicase Q5 OS=Homo sapiens GN=RECQL5 PE=1 SV=2
0.330173	-0.0290006	0.378078	0.317667	0.200373	0.11131	0.0912502	-0.0260438	-0.115107	0.1186	0.161088	0.2817	0.24042	0.159982	0.364557	0.0532907	-0.0271473	0.177428	0.149931	0.159926	0.269341	0.361321	0.327597	0.316107	0.168255	0.134531	0.123041			O94763	Unconventional prefoldin RPB5 interactor 1 OS=Homo sapiens GN=URI1 PE=1 SV=3
0.176949	0.161779	0.0249419	-0.142522	-0.836238	-0.219712	-0.263745	-0.957461	-0.340935	0.0836497	0.154659	0.250323	0.0271246	-0.37424	0.0922489	-0.135753	-0.537117	-0.0706283	-0.00840386	-0.584297	-0.238017	-0.0793077	-0.680449	-0.525631	0.197598	-0.403543	-0.248725	Glycosaminoglycan biosynthesis - chondroitin sulfate;Glycosaminoglycan biosynthesis - heparan sulfate	ko00532;ko00534	O94766	Galactosylgalactosylxylosylprotein 3-beta-glucuronosyltransferase 3 OS=Homo sapiens GN=B3GAT3 PE=1 SV=2
-0.0971929	-0.215722	-0.124925	-0.336392	-0.400872	-0.327256	-0.190445	-0.254925	-0.181309	-0.267896	-0.298712	-0.283266	-0.357772	-0.221647	-0.311202	-0.0744807	0.0616443	-0.0279107	-0.231913	-0.215248	-0.257931	-0.269937	-0.24532	-0.308381	-0.0349063	-0.0102893	-0.0733503			O94776	Metastasis-associated protein MTA2 OS=Homo sapiens GN=MTA2 PE=1 SV=1
0.428343	0.131182	0.107486	-0.414091	-0.434143	-0.476252	-0.636428	-0.65648	-0.698589	-2.36141	0.544405	0.788195	-0.517697	1.68298	0.329108	-0.17476	2.02592	0.672045	-0.263169	-0.0934435	-0.822268	-0.506005	-0.37072	-0.523492	-0.113045	0.0222402	-0.130532			O94782	Ubiquitin carboxyl-terminal hydrolase 1 OS=Homo sapiens GN=USP1 PE=1 SV=1
-0.238545	-0.540406	-0.566628	-0.357107	-0.157919	-0.346387	0.0914193	0.290607	0.102139	-0.9206	-0.70319	-0.658967	-0.870501	-0.225132	-0.697388	-0.109582	0.535787	0.063531	-0.520123	-0.679786	-0.828479	-0.62717	-0.325235	-0.408925	0.0489593	0.350894	0.267204	Retinol metabolism	ko00830	O94788	Retinal dehydrogenase 2 OS=Homo sapiens GN=ALDH1A2 PE=1 SV=3
0.232484	-0.0376007	0.0883459	0.31775	-0.00768656	0.314107	0.22334	-0.102096	0.219697	-0.0654318	0.140389	0.0952015	-0.251932	-0.249442	0.0714688	-0.308652	-0.306162	0.0147492	-0.0826286	-0.471787	-0.0984236	0.00731805	-0.183855	-0.273195	0.224931	0.0337581	-0.0555819			O94804	Serine/threonine-protein kinase 10 OS=Homo sapiens GN=STK10 PE=1 SV=1
-0.0608896	-0.589546	-0.195969	-0.107104	-0.552711	-0.0756493	0.175031	-0.270576	0.206486	-0.153279	-0.0423938	-0.188162	0.132683	0.0880752	0.307105	0.260628	0.21602	0.43505	0.0738041	-0.171131	-0.400323	0.26157	-0.0176493	0.09745	0.427453	0.148234	0.263333	Regulation of autophagy;RIG-I-like receptor signaling pathway	ko04140;ko04622	O94817	Ubiquitin-like protein ATG12 OS=Homo sapiens GN=ATG12 PE=1 SV=1
0.145291	0.00639503	0.0483453	0.34115	0.329289	0.304234	0.274473	0.262612	0.237557	0.11759	0.132274	0.119441	0.228564	0.243561	0.303634	0.105462	0.120459	0.180532	0.0957755	0.0581288	-0.0326262	0.382187	0.303318	0.263375	0.341761	0.262892	0.222949			O94826	Mitochondrial import receptor subunit TOM70 OS=Homo sapiens GN=TOMM70 PE=1 SV=1
0.099024	0.212673	0.218617	-0.068437	0.0337631	0.0180872	-0.245208	-0.143008	-0.158684	0.0440537	0.191641	-0.006787	-0.0113132	0.292821	0.13165	-0.0876158	0.216518	0.0553474	0.0650559	0.432774	0.238854	0.129634	0.580265	0.230407	-0.115927	0.334704	-0.0151543			O94829	Importin-13 OS=Homo sapiens GN=IPO13 PE=1 SV=3
-0.173882	-0.0737721	-0.185042	-0.064531	0.042918	-0.159157	0.079701	0.18715	-0.014925	-0.144019	-0.195517	-0.17756	0.157063	0.268881	0.183307	0.329428	0.441246	0.355672	0.00884823	0.128481	-0.0969877	0.403848	0.473124	0.533733	0.390401	0.459677	0.520286			O94830	Phospholipase DDHD2 OS=Homo sapiens GN=DDHD2 PE=1 SV=2
0.111007	0.064987	-0.029568	-0.0573527	-0.0632385	-0.187694	-0.106161	-0.112047	-0.236503	0.0798775	-0.0122298	0.0906025	0.0760912	0.0138962	0.156466	0.0233411	-0.0388539	0.103716	0.124264	0.105389	0.181174	0.194357	0.213057	0.315378	0.0574147	0.0761147	0.178436			O94832	Unconventional myosin-Id OS=Homo sapiens GN=MYO1D PE=1 SV=2
0.12146	-0.300162	0.105249	0.217591	-0.0367265	0.0715035	0.242075	-0.0122422	0.0959878	-0.036698	-0.0837422	-0.232934	0.0281923	-0.154247	-0.256466	0.145984	-0.0364556	-0.138675	-0.133702	-0.0784626	-0.226524	-0.230374	-0.215042	-0.607119	-0.0841445	-0.0688125	-0.460889			O94842	TOX high mobility group box family member 4 OS=Homo sapiens GN=TOX4 PE=1 SV=1
2.5225	3.75266	3.95211	0.190882	-0.0950259	-0.474903	-3.21821	-3.50412	-3.88399	-0.419644	-0.186878	-0.289817	0.151458	-0.0413422	0.403328	0.450238	0.257437	0.702108	-0.261897	-0.599477	-0.126877	-1.05778	-0.0525452	-0.31123	-0.728363	0.276872	0.018187			O94851	[F-actin]-methionine sulfoxide oxidase MICAL2 OS=Homo sapiens GN=MICAL2 PE=1 SV=1
0.163236	0.174093	0.113068	-0.167103	-0.181425	-0.243896	-0.317235	-0.331557	-0.394028	0.158991	0.121262	0.204634	-0.17554	-0.190086	-0.218713	-0.337169	-0.351715	-0.380342	0.137218	0.15627	0.181582	-0.285918	-0.208031	-0.14949	-0.444275	-0.366388	-0.307847	Protein processing in endoplasmic reticulum	ko04141	O94855	Protein transport protein Sec24D OS=Homo sapiens GN=SEC24D PE=1 SV=2
0.170463	0.0706369	0.0397965	0.175287	0.147953	0.162293	0.0816549	0.0543209	0.0686609	0.0322091	0.226302	0.0645716	-0.00705618	0.2132	-0.146778	-0.11475	0.105506	-0.254472	-0.189521	0.0825977	0.0166656	-0.483282	-0.0560309	-0.17716	-0.453196	-0.025945	-0.147074			O94864	STAGA complex 65 subunit gamma OS=Homo sapiens GN=SUPT7L PE=1 SV=1
0.14945	0.100751	0.0749786	0.0740694	0.0512134	0.028689	-0.0343238	-0.0571798	-0.0797042	0.0502527	0.128485	0.167232	0.0532559	0.0885755	0.111367	-0.0620673	-0.0267477	-0.00395623	0.0638019	0.143326	0.104952	0.054239	0.101958	0.0712462	-0.0497876	-0.00206863	-0.0327804			O94874	E3 UFM1-protein ligase 1 OS=Homo sapiens GN=UFL1 PE=1 SV=2
-0.366835	-0.213565	-0.14279	-0.473251	-0.362627	-0.306496	-0.232188	-0.121564	-0.0654327	0.17047	-0.395074	0.656598	-0.0374929	-0.661019	0.419012	-0.181491	-0.805017	0.275014	0.193662	0.103221	0.189352	0.129052	0.157117	0.287472	-0.0330263	-0.00496133	0.125394			O94875	Sorbin and SH3 domain-containing protein 2 OS=Homo sapiens GN=SORBS2 PE=1 SV=3
-0.171563	-0.148343	-0.0926625	-0.0394862	-0.31068	-0.123765	0.0980366	-0.173157	0.0137578	-0.0756646	-0.156839	-0.112686	-0.32506	-0.283219	-0.2568	-0.209997	-0.168156	-0.141737	-0.0105888	-0.11597	-0.130445	-0.145711	-0.236688	-0.360785	-0.0600431	-0.15102	-0.275117			O94880	PHD finger protein 14 OS=Homo sapiens GN=PHF14 PE=1 SV=2
0.0441575	-0.0460153	-0.103408	-0.417311	-0.601299	-0.619546	-0.382222	-0.56621	-0.584457	0.204961	0.280014	0.20152	-0.321475	-0.332572	-0.461025	-0.550307	-0.561404	-0.689857	-0.234483	-0.137242	-0.0486205	-0.324233	-0.655973	-0.540557	-0.184118	-0.515858	-0.400442			O94885	SAM and SH3 domain-containing protein 1 OS=Homo sapiens GN=SASH1 PE=1 SV=3
0.206968	-0.0929694	-0.208032	0.0256632	-0.215021	-0.381672	0.0570077	-0.183677	-0.350328	0.0433423	-0.31708	-0.111162	-0.11858	-0.303973	-0.0203933	0.0097199	-0.175673	0.107907	0.133236	-0.231116	0.148444	0.497751	0.180079	0.45995	0.480896	0.163224	0.443095	Adherens junction	ko04520	O94887	FERM, RhoGEF and pleckstrin domain-containing protein 2 OS=Homo sapiens GN=FARP2 PE=1 SV=3
0.0819433	0.0446753	0.128128	0.0909074	0.180287	0.0634493	0.00599187	0.0953715	-0.0214662	-0.165573	-0.100991	-0.142236	-0.27972	-0.111257	-0.203237	-0.143453	0.0250097	-0.0669703	-0.0107164	0.0462567	-0.00535733	0.046355	-0.133721	0.0548494	0.036294	-0.143782	0.0447884			O94888	UBX domain-containing protein 7 OS=Homo sapiens GN=UBXN7 PE=1 SV=2
-0.14046	-0.213653	0.0539122	0.187217	0.340754	0.116265	0.287284	0.440821	0.216332	-0.0667494	0.0748195	0.0132677	-0.0774605	0.0271543	-0.0921158	-0.0845731	0.0200417	-0.0992284	0.105847	0.023471	-0.21499	0.267126	0.0783043	-0.000981326	0.295683	0.106862	0.027576			O94901	SUN domain-containing protein 1 OS=Homo sapiens GN=SUN1 PE=1 SV=3
-0.0696771	-0.178276	-0.132042	-0.0700445	-0.0493958	-0.0743655	0.0566205	0.0772692	0.0522995	0.223423	0.0141943	0.0371961	-0.132939	-0.185846	-0.169611	-0.224543	-0.27745	-0.261215	0.091157	0.1722	0.036501	-0.357219	-0.113783	-0.196548	-0.457172	-0.213736	-0.296501			O94903	Proline synthase co-transcribed bacterial homolog protein OS=Homo sapiens GN=PROSC PE=1 SV=1
-0.200588	-0.160272	-0.10292	-0.0327574	0.0567949	0.155316	0.121836	0.211388	0.309909	0.151621	0.117368	0.149385	-0.109951	-0.0559105	-0.0940204	-0.249409	-0.195369	-0.233478	-0.235689	-0.110797	-0.155388	-0.0016248	0.0827955	0.00895386	0.165667	0.250087	0.176245			O94905	Erlin-2 OS=Homo sapiens GN=ERLIN2 PE=1 SV=1
-0.0327135	-0.058854	-0.101421	-0.029758	0.11968	-0.0614617	0.0345715	0.184009	0.0028678	-0.12826	-0.0411709	-0.0570804	-0.091566	-0.069315	-0.0251625	-0.0160622	0.00618877	0.0503413	0.00435304	0.0376718	-0.0168419	0.0290535	-0.010265	-0.000198686	0.0206592	-0.0186593	-0.008593	Spliceosome	ko03040	O94906	Pre-mRNA-processing factor 6 OS=Homo sapiens GN=PRPF6 PE=1 SV=1
-0.318544	-0.100719	-0.266796	-0.0826287	0.0292164	-0.0768062	0.146058	0.257903	0.15188	-0.2459	-0.0531618	-0.258194	0.0491462	0.232504	-0.189261	0.234898	0.418256	-0.00350907	0.12351	-0.117931	0.0711376	0.187972	-0.092508	0.37219	0.1624	-0.11808	0.346618			O94910	Adhesion G protein-coupled receptor L1 OS=Homo sapiens GN=ADGRL1 PE=1 SV=1
-0.241196	-0.0797129	-0.0449487	-0.326256	-0.364726	-0.223083	-0.204303	-0.242773	-0.10113	-0.281354	-0.190339	-0.184865	-0.407999	-0.213261	-0.150124	-0.189146	0.00559167	0.0687287	-0.0698868	-0.0844435	-0.196606	-0.306161	-0.250246	-0.521714	-0.189182	-0.133267	-0.404735	mRNA surveillance pathway	ko03015	O94913	Pre-mRNA cleavage complex 2 protein Pcf11 OS=Homo sapiens GN=PCF11 PE=1 SV=3
-0.0705271	-0.00755335	-0.100813	-0.286025	-0.387914	-0.448062	-0.226394	-0.328283	-0.388431	-0.177373	0.0880985	-0.43117	0.161279	0.0986949	-0.32875	0.334761	0.272176	-0.155269	0.095643	0.0872709	-0.0252371	0.113915	0.101126	-0.0246157	0.0613561	0.0485671	-0.0771746			O94915	Protein furry homolog-like OS=Homo sapiens GN=FRYL PE=1 SV=2
0.437866	0.337227	0.35816	0.42724	0.497147	0.205153	0.049489	0.119396	-0.172598	0.518678	0.261257	0.333187	0.408875	-0.0605678	0.336852	0.0378343	-0.431608	-0.0341887	0.0667765	0.0179166	0.139029	-0.0956128	0.00759934	0.133978	-0.170187	-0.0669747	0.059404	Axon guidance;B cell receptor signaling pathway;Natural killer cell mediated cytotoxicity;T cell receptor signaling pathway;VEGF signaling pathway;Wnt signaling pathway	ko04310;ko04360;ko04370;ko04650;ko04660;ko04662	O94916	Nuclear factor of activated T-cells 5 OS=Homo sapiens GN=NFAT5 PE=1 SV=1
-0.190197	-0.162168	-0.229427	-0.0162881	-0.0619162	-0.0742893	0.177643	0.132014	0.119641	0.000679892	-0.0824043	-0.151935	0.151769	0.0245186	-0.100916	0.229655	0.102405	-0.0230295	-0.0885087	-0.00517476	-0.0107618	0.154424	0.181439	0.233175	0.189239	0.216254	0.26799	Apoptosis	ko04210	O94919	Endonuclease domain-containing 1 protein OS=Homo sapiens GN=ENDOD1 PE=1 SV=2
-0.0514867	-0.757135	-0.20407	-0.207908	-0.395647	0.0558659	0.129656	-0.0580831	0.39343	0.720446	0.296825	0.704151	0.737236	-1.03447	0.510024	0.163429	-1.60828	-0.0637833	-0.536353	0.417374	0.58787	-0.142707	0.237814	0.721294	-0.299004	0.081517	0.564997			O94921	Cyclin-dependent kinase 14 OS=Homo sapiens GN=CDK14 PE=1 SV=3
-0.0312956	-0.300568	-0.126532	-0.0421984	-0.0379681	-0.0981565	0.1106	0.11483	0.054642	-0.304527	-0.0786259	-0.0176856	-0.205153	0.304488	0.357603	-0.0715402	0.438101	0.491216	-0.443883	-0.72057	-0.156068	0.0685754	0.066499	0.0927376	0.508749	0.506673	0.532911	Glycosaminoglycan biosynthesis - heparan sulfate	ko00534	O94923	D-glucuronyl C5-epimerase OS=Homo sapiens GN=GLCE PE=1 SV=3
0.127419	-0.067586	0.0716831	0.348644	-0.120302	0.30759	0.304805	-0.164141	0.263751	0.0617967	-0.0403153	-0.119578	0.229087	0.138993	0.0219147	0.261786	0.171692	0.0546136	-0.165952	-0.0976732	-0.154189	0.395764	0.21636	0.289786	0.535035	0.355631	0.429057	Alanine, aspartate and glutamate metabolism;Arginine and proline metabolism;D-Glutamine and D-glutamate metabolism;Nitrogen metabolism;Proximal tubule bicarbonate reclamation	ko00250;ko00330;ko00471;ko00910;ko04964	O94925	Glutaminase kidney isoform, mitochondrial OS=Homo sapiens GN=GLS PE=1 SV=1
-0.184258	-0.314647	-0.277682	-0.207036	-0.358132	-0.355092	0.0518263	-0.0992697	-0.0962297	-0.549593	-0.299224	-0.335228	-0.603442	-0.537751	-0.763835	-0.20876	-0.143069	-0.369153	-0.336672	-0.151727	-0.229617	-0.824996	-0.581202	-0.762692	-0.585657	-0.341863	-0.523353			O94927	HAUS augmin-like complex subunit 5 OS=Homo sapiens GN=HAUS5 PE=1 SV=2
0.519415	0.329186	0.617588	0.642233	0.652262	0.797353	0.153503	0.163532	0.308623	-0.268188	-0.544452	-0.675972	-0.337253	-0.848443	-0.550481	0.158951	-0.352239	-0.054277	-0.141351	0.0667223	-0.122919	-0.26742	-0.388958	-0.598702	-0.201571	-0.323109	-0.532853			O94933	SLIT and NTRK-like protein 3 OS=Homo sapiens GN=SLITRK3 PE=2 SV=2
-0.0640516	-0.0723285	0.104409	0.0264604	-0.0430941	0.281134	0.0371174	-0.0324371	0.291791	-0.366922	-0.152931	0.145965	-0.16296	-0.182288	0.404734	-0.0383307	-0.0576587	0.529363	-0.102313	-0.0051774	-0.0300971	-0.421019	-0.40453	-0.465151	-0.375157	-0.358668	-0.419288			O94952	F-box only protein 21 OS=Homo sapiens GN=FBXO21 PE=2 SV=2
0.177126	-0.207909	0.041235	0.0679946	0.281854	0.150123	0.0645106	0.27837	0.146639	0.311712	0.0709584	0.247663	0.304291	0.140597	0.365975	0.0941799	-0.0695141	0.155864	0.586748	0.682027	0.57559	0.568898	0.614266	0.560285	-0.0458903	-0.000522333	-0.0545033			O94953	Lysine-specific demethylase 4B OS=Homo sapiens GN=KDM4B PE=1 SV=4
-0.223406	-0.241067	-0.298427	-0.145984	-0.19257	-0.190121	0.108316	0.06173	0.064179	-0.0830518	-0.115086	-0.176625	-0.0596847	-0.0530612	-0.036567	0.0652362	0.0718597	0.0883539	-0.109785	-0.101009	-0.146112	-0.0121248	-0.0498627	-0.107855	0.106844	0.069106	0.0111137			O94964	Protein SOGA1 OS=Homo sapiens GN=SOGA1 PE=1 SV=2
0.0367103	0.128738	0.172707	0.198962	0.189119	0.126198	0.0862436	0.0764006	0.0134796	0.0137686	0.213413	0.1842	0.240763	0.275118	0.331814	0.103636	0.137991	0.194687	0.0730261	0.0734911	0.146859	0.0419838	0.219616	0.270511	-0.0558083	0.121824	0.172719			O94966	Ubiquitin carboxyl-terminal hydrolase 19 OS=Homo sapiens GN=USP19 PE=1 SV=2
-0.00702461	0.0797493	0.0979857	-0.0481544	0.0199029	0.0288119	-0.105058	-0.0370006	-0.0280916	0.0149884	0.135995	0.14844	-0.0299829	0.201103	-0.00384962	-0.129791	0.101295	-0.103657	0.14166	0.014189	0.153202	0.141818	0.000514815	0.126203	0.038801	-0.102502	0.023186			O94967	WD repeat-containing protein 47 OS=Homo sapiens GN=WDR47 PE=1 SV=1
0.0707265	-0.0895432	0.183604	0.0171628	-0.195563	0.0590016	-0.0377663	-0.250492	0.0040725	-0.512355	-0.223341	0.244059	-0.21748	-0.147397	-0.00764046	-0.053601	0.016482	0.156239	0.0242903	-0.0448136	-0.00879849	-0.0479751	0.0957735	0.0271334	-0.0382012	0.105547	0.0369073	Endocrine and other factor-regulated calcium reabsorption;Endocytosis;Huntington's disease	ko04144;ko04961;ko05016	O94973	AP-2 complex subunit alpha-2 OS=Homo sapiens GN=AP2A2 PE=1 SV=2
0.105302	0.248828	0.169668	-0.0362335	0.0487644	0.134828	-0.210833	-0.125835	-0.0397713	0.156527	0.348021	0.207477	0.177064	0.333023	0.243042	-0.0602777	0.0956813	0.00570033	0.0862105	0.109756	0.0410736	0.165085	0.112065	0.0843289	0.0860716	0.0330516	0.00531553	Protein processing in endoplasmic reticulum	ko04141	O94979	Protein transport protein Sec31A OS=Homo sapiens GN=SEC31A PE=1 SV=3
-0.829054	-0.675439	-0.722136	-0.679774	-0.600493	-0.697559	0.0624357	0.141717	0.0446507	-0.208963	-0.380769	-0.303521	-0.181382	-0.465036	-0.00507315	0.116369	-0.167285	0.292678	0.211605	0.312159	0.363196	0.0997974	0.0948976	0.24205	-0.195856	-0.200756	-0.0536033			O94985	Calsyntenin-1 OS=Homo sapiens GN=CLSTN1 PE=1 SV=1
-0.061474	-0.111996	-0.223544	-0.0148133	0.0694183	-0.146598	0.117525	0.201756	-0.01426	0.115773	0.0682121	0.0700663	0.252539	0.137453	0.195847	0.167855	0.0527692	0.111163	-0.03128	-0.0181877	-0.208157	-0.181417	-0.0387707	-0.123143	-0.0955421	0.0471042	-0.0372681			O94992	Protein HEXIM1 OS=Homo sapiens GN=HEXIM1 PE=1 SV=1
-0.375384	-0.294798	-0.232638	-0.024944	-0.409085	-0.228395	0.275996	-0.108145	0.072545	-0.23788	0.0431258	-0.229616	-0.282588	0.169523	0.0092001	-0.141131	0.31098	0.150657	0.00383103	-0.196316	-0.0563893	0.136921	0.111234	0.0515168	0.219879	0.194192	0.134475	Tight junction	ko04530	O95049	Tight junction protein ZO-3 OS=Homo sapiens GN=TJP3 PE=1 SV=3
0.0501646	0.127233	0.21121	-0.507739	-0.346753	-0.411924	-0.637275	-0.476289	-0.54146	0.123322	0.0830866	0.153783	0.138453	0.381864	-0.00672378	0.0183891	0.2618	-0.126788	0.11129	0.0696184	0.314985	0.0705002	-0.277371	0.360648	-0.0947976	-0.442669	0.19535	RNA transport	ko03013	O95059	Ribonuclease P protein subunit p14 OS=Homo sapiens GN=RPP14 PE=1 SV=3
-0.0750874	0.275237	0.104948	-0.263211	-0.192922	-0.0703464	-0.36491	-0.294621	-0.172046	0.174343	0.285541	0.514731	-0.81754	-1.29619	-0.574396	-1.14241	-1.62106	-0.899268	0.159713	0.0401815	0.0187451	-0.283934	-0.585521	-0.490165	-0.356814	-0.658401	-0.563045	Cell cycle;p53 signaling pathway;Progesterone-mediated oocyte maturation	ko04110;ko04115;ko04914	O95067	G2/mitotic-specific cyclin-B2 OS=Homo sapiens GN=CCNB2 PE=1 SV=1
0.0772273	0.0507004	0.0741271	0.110495	0.0994913	0.0747978	0.0431434	0.0321397	0.0074462	-0.0164419	0.0480236	0.0114884	-0.0193364	0.0722183	0.0814449	-0.0336931	0.0578616	0.0670882	-0.06642	-0.0495979	-0.0179841	-0.182532	-0.132291	-0.162131	-0.137865	-0.0876237	-0.117464	Ubiquitin mediated proteolysis	ko04120	O95071	E3 ubiquitin-protein ligase UBR5 OS=Homo sapiens GN=UBR5 PE=1 SV=2
0.190909	0.257049	0.118239	-0.0123028	-0.33999	-0.287831	-0.201035	-0.528722	-0.476563	0.0767024	0.139094	0.291842	0.0706736	-0.0456355	0.158628	-0.0985392	-0.214848	-0.0105848	0.0743726	0.119462	0.43437	0.0563531	-0.131863	0.022196	-0.153048	-0.341265	-0.187206			O95081	Arf-GAP domain and FG repeat-containing protein 2 OS=Homo sapiens GN=AGFG2 PE=1 SV=2
-0.264823	-0.269051	-0.251581	0.124474	0.048255	0.403554	0.386292	0.310073	0.665372	0.119748	0.224577	0.0379689	0.0460378	0.270773	0.0747098	-0.0813935	0.143342	-0.0527215	0.259524	-0.0154209	0.0396094	0.233701	-0.0360597	0.112412	0.13913	-0.130631	0.0178412			O95104	Splicing factor, arginine/serine-rich 15 OS=Homo sapiens GN=SCAF4 PE=1 SV=3
-0.61898	-0.331453	-0.566074	-0.281334	-0.158178	-0.594873	0.224168	0.347324	-0.0893707	0.054136	-0.0789919	-0.154471	0.0214788	-0.169743	-0.454501	0.0812544	-0.109967	-0.394725	-0.418048	-0.510789	-0.273931	-0.145581	-0.0401333	-0.0544092	0.255342	0.360789	0.346513	Alzheimer's disease;Huntington's disease;Oxidative phosphorylation;Parkinson's disease	ko00190;ko05010;ko05012;ko05016	O95139	NADH dehydrogenase [ubiquinone] 1 beta subcomplex subunit 6 OS=Homo sapiens GN=NDUFB6 PE=1 SV=3
0.159088	0.187411	0.302874	-0.141127	-0.0168675	-0.00525402	-0.357585	-0.233325	-0.221712	0.0224156	0.0787997	0.179101	-0.325137	-0.294289	-0.307589	-0.418576	-0.387728	-0.401028	-0.119004	-0.03524	-0.10274	-0.564962	-0.585184	-0.64628	-0.479301	-0.499523	-0.560619			O95140	Mitofusin-2 OS=Homo sapiens GN=MFN2 PE=1 SV=3
0.126869	0.0257138	-0.044135	-0.0585815	-0.0414737	0.256999	-0.0947308	-0.077623	0.22085	0.0480695	-0.074194	-0.0429585	0.211887	0.0712287	0.14733	0.234915	0.0942564	0.170358	0.0506179	-0.225809	-0.117356	0.283019	0.0840095	0.0578175	0.380535	0.181525	0.155333	RNA transport	ko03013	O95149	Snurportin-1 OS=Homo sapiens GN=SNUPN PE=1 SV=1
0.10376	0.0364823	0.119494	-0.175054	-0.109694	-0.119172	-0.261633	-0.196273	-0.205751	0.140192	0.0103609	0.0353431	-0.129819	-0.166381	-0.0720868	-0.191784	-0.228346	-0.134052	0.0603229	0.0326298	0.0762818	-0.0508195	0.0149132	-0.00276679	-0.107231	-0.0414983	-0.0591783	Protein processing in endoplasmic reticulum;Ubiquitin mediated proteolysis	ko04120;ko04141	O95155	Ubiquitin conjugation factor E4 B OS=Homo sapiens GN=UBE4B PE=1 SV=1
0.0788984	0.130753	0.355476	-0.294273	-0.124982	0.124954	-0.482649	-0.313358	-0.0634218	-0.309888	-0.126806	-0.0612128	-0.160682	-0.0597893	-0.20655	0.00528693	0.10618	-0.0405811	0.0929613	-0.0507394	0.179346	-0.026847	-0.145802	0.040216	-0.100703	-0.219658	-0.03364			O95159	Zinc finger protein-like 1 OS=Homo sapiens GN=ZFPL1 PE=1 SV=2
-0.104918	-0.0140396	0.0365213	-0.104941	-0.0629632	-0.128531	-0.0774622	-0.0354844	-0.101052	-0.121358	0.09954	-0.0841285	-0.0283385	0.152408	0.00316818	0.006977	0.187723	0.0384837	-0.133813	0.0252539	0.0940606	-0.10749	0.245548	0.286223	-0.102657	0.250381	0.291056			O95163	Elongator complex protein 1 OS=Homo sapiens GN=IKBKAP PE=1 SV=3
0.118479	-0.160542	-0.0377611	0.173315	0.17521	0.189967	0.199923	0.201818	0.216575	0.0105523	0.0985748	-0.176668	-0.142185	-0.103589	-0.223869	-0.119671	-0.0810754	-0.201355	-0.0122019	-0.366505	0.0455077	0.0617514	-0.146931	-0.0125809	0.172818	-0.0358646	0.0984855	Alzheimer's disease;Huntington's disease;Oxidative phosphorylation;Parkinson's disease	ko00190;ko05010;ko05012;ko05016	O95168	NADH dehydrogenase [ubiquinone] 1 beta subcomplex subunit 4 OS=Homo sapiens GN=NDUFB4 PE=1 SV=3
-0.559999	-0.900962	-0.899157	0.172644	-0.144718	-0.288301	0.95935	0.641988	0.498405	0.149518	0.338609	0.162753	-0.211836	0.106634	-0.0227646	-0.428796	-0.110326	-0.239725	-0.0977703	-0.825362	-0.597103	-0.505333	-0.318956	-0.0753185	0.0014121	0.187789	0.431427	Alzheimer's disease;Huntington's disease;Oxidative phosphorylation;Parkinson's disease	ko00190;ko05010;ko05012;ko05016	O95169	NADH dehydrogenase [ubiquinone] 1 beta subcomplex subunit 8, mitochondrial OS=Homo sapiens GN=NDUFB8 PE=1 SV=1
0.442915	0.0124717	0.36277	0.182587	0.131482	0.434887	-0.0901319	-0.141237	0.162168	0.238774	0.283783	0.249093	0.161049	0.23612	0.196534	-0.0961677	-0.0210967	-0.0606827	0.133376	-0.186131	0.0823892	0.564693	0.126678	0.295822	0.554815	0.1168	0.285944	Alzheimer's disease;Huntington's disease;Oxidative phosphorylation;Parkinson's disease	ko00190;ko05010;ko05012;ko05016	O95182	NADH dehydrogenase [ubiquinone] 1 alpha subcomplex subunit 7 OS=Homo sapiens GN=NDUFA7 PE=1 SV=3
-0.0422623	-0.0161437	0.0170218	-0.191901	-0.153609	-0.20281	-0.178106	-0.139814	-0.189015	-0.134677	-0.0304399	-0.393859	-0.0149224	0.0536188	-0.543345	0.171403	0.239944	-0.35702	-0.0706211	-0.330447	-0.00670564	-0.0432491	0.136123	0.20445	0.0926755	0.272048	0.340375			O95197	Reticulon-3 OS=Homo sapiens GN=RTN3 PE=1 SV=2
-0.256919	-0.0313081	-0.0951619	0.132885	0.267621	0.241103	0.260681	0.395417	0.368899	-0.308554	-0.222617	-0.28756	-0.200351	-0.0477706	-0.302103	0.0725593	0.22514	-0.0291927	-0.473807	-0.410304	-0.476153	-0.142885	-0.0967718	-0.0967575	0.310536	0.35665	0.356664			O95202	LETM1 and EF-hand domain-containing protein 1, mitochondrial OS=Homo sapiens GN=LETM1 PE=1 SV=1
-0.147247	-0.0984905	-0.129439	-0.081006	-0.0229729	-0.091503	0.0440528	0.102086	0.0335558	0.0274238	-0.145417	-0.082842	-0.0550039	-0.228407	-0.0091919	0.0119412	-0.161462	0.0577532	-0.104057	0.0991376	-0.0217895	-0.0610556	0.00558874	-0.143887	-0.0521526	0.0144917	-0.134984	Endocytosis	ko04144	O95208	Epsin-2 OS=Homo sapiens GN=EPN2 PE=1 SV=3
-0.0371709	0.481179	0.129482	0.0825481	0.453846	0.204396	-0.108615	0.262683	0.0132326	-0.0831793	0.489931	0.168591	-0.170175	0.174873	0.0896094	-0.361956	-0.0169079	-0.102171	0.0984794	0.279704	0.0762933	-0.104388	0.262291	0.108388	-0.25588	0.110799	-0.0431042			O95210	Starch-binding domain-containing protein 1 OS=Homo sapiens GN=STBD1 PE=1 SV=1
-0.00815867	-0.183107	-0.0527106	0.110106	-0.0930814	0.173919	0.191431	-0.011756	0.255244	-0.251585	-0.264831	-0.111584	-0.113922	-0.216986	-0.108529	0.0954113	-0.00765267	0.100804	-0.0668744	-0.143964	0.0747356	-0.124514	-0.360024	-0.189053	-0.0791464	-0.314656	-0.143685			O95218	Zinc finger Ran-binding domain-containing protein 2 OS=Homo sapiens GN=ZRANB2 PE=1 SV=2
-0.103174	-0.122997	0.0568818	-0.182228	-0.203702	-0.301553	-0.125798	-0.147272	-0.245123	0.0481535	0.111882	-0.000525491	-0.103093	0.012174	-0.0798667	-0.156263	-0.040996	-0.133037	-0.147687	-0.0254239	-0.070928	-0.226881	-0.176033	-0.190453	-0.145535	-0.0946867	-0.109107			O95219	Sorting nexin-4 OS=Homo sapiens GN=SNX4 PE=1 SV=1
-0.0996643	-0.232832	-0.0696264	-0.596783	-0.364194	-0.685502	-0.462742	-0.230153	-0.551461	0.194364	0.474258	0.192962	-1.57415	-1.25146	-1.65505	-1.86134	-1.53865	-1.94224	-0.060987	-0.00510811	-0.114637	-0.664571	-0.814024	-1.0459	-0.604327	-0.75378	-0.985656			O95229	ZW10 interactor OS=Homo sapiens GN=ZWINT PE=1 SV=2
0.0145335	0.0546529	0.121515	0.140347	0.129887	0.21419	0.0767799	0.0663199	0.150623	0.0315269	0.0739001	0.11957	0.110078	0.128723	0.245563	0.035079	0.053724	0.170564	-0.074961	-0.101534	0.0787343	-0.21253	-0.134337	-0.0396686	-0.179943	-0.10175	-0.0070817			O95232	Luc7-like protein 3 OS=Homo sapiens GN=LUC7L3 PE=1 SV=2
-0.205881	-0.243161	-0.252005	-0.758844	-0.708898	-0.740881	-0.525162	-0.475216	-0.507199	-0.0399856	-0.104729	-0.000600551	-1.39839	-1.3418	-1.35988	-1.34995	-1.29336	-1.31144	-0.0130198	-0.157459	0.0345966	-0.939834	-0.939735	-0.924806	-0.89454	-0.894441	-0.879512			O95235	Kinesin-like protein KIF20A OS=Homo sapiens GN=KIF20A PE=1 SV=1
-0.409796	-0.408788	-0.375982	-0.591576	-0.591313	-0.593224	-0.193387	-0.193124	-0.195035	-0.186537	-0.225342	-0.176196	-0.799589	-0.70339	-0.682361	-0.603564	-0.507365	-0.486336	-0.176658	-0.0768351	-0.126118	-0.874451	-0.777669	-0.794701	-0.747914	-0.651132	-0.668164			O95239	Chromosome-associated kinesin KIF4A OS=Homo sapiens GN=KIF4A PE=1 SV=3
-0.135581	-0.257179	0.0883844	0.782347	0.637109	0.883748	0.883806	0.738568	0.985207	0.149545	0.338326	0.184772	0.374205	0.535025	0.350311	0.149991	0.310811	0.126097	0.347999	-0.127656	0.0223539	0.634294	0.489243	0.33601	0.553395	0.408344	0.255111			O95248	Myotubularin-related protein 5 OS=Homo sapiens GN=SBF1 PE=1 SV=3
-0.135581	-0.257179	0.0883844	0.782347	0.637109	0.883748	0.883806	0.738568	0.985207	0.149545	0.338326	0.184772	0.374205	0.535025	0.350311	0.149991	0.310811	0.126097	0.347999	-0.127656	0.0223539	0.634294	0.489243	0.33601	0.553395	0.408344	0.255111			O95248	Myotubularin-related protein 5 OS=Homo sapiens OX=9606 GN=SBF1 PE=1 SV=4
-0.355037	-0.0511403	-0.0876361	-0.102848	0.181004	0.207346	0.0617565	0.345608	0.37195	0.0174136	-0.121352	-0.168223	0.471008	0.452917	0.288535	0.561728	0.543637	0.379255	-0.183839	-0.270606	-0.166936	0.379385	0.361201	0.341453	0.586512	0.568328	0.54858	SNARE interactions in vesicular transport	ko04130	O95249	Golgi SNAP receptor complex member 1 OS=Homo sapiens GN=GOSR1 PE=1 SV=1
0.0121578	0.235518	0.0582814	-0.294926	-0.254938	-0.376358	-0.396912	-0.356924	-0.478344	-0.00911501	-0.0422515	0.0150498	-0.126384	-0.0875148	-0.232449	-0.114278	-0.0754092	-0.220343	0.053476	-0.147374	-0.0300774	-0.282695	-0.280714	-0.3702	-0.24137	-0.239389	-0.328875			O95251	Histone acetyltransferase KAT7 OS=Homo sapiens GN=KAT7 PE=1 SV=1
0.324374	0.0260563	0.124098	-0.0376486	-0.253336	-0.0603154	-0.195825	-0.411512	-0.218491	0.0737868	0.0177267	0.190535	0.210697	-0.094451	0.131016	0.116681	-0.188467	0.0369998	0.0740008	0.282851	0.338512	-0.159493	0.10577	-0.0154432	-0.391281	-0.126018	-0.247231			O95260	Arginyl-tRNA--protein transferase 1 OS=Homo sapiens GN=ATE1 PE=1 SV=2
0.525576	0.255031	0.59545	-0.0435923	-0.27194	0.199041	-0.502278	-0.730626	-0.259645	0.273879	0.820939	0.678593	-0.237246	0.251275	0.0891737	-0.828383	-0.339862	-0.501963	0.278696	0.502414	0.126091	-0.0197563	0.292075	-0.242929	-0.322157	-0.0103253	-0.545329			O95271	Tankyrase-1 OS=Homo sapiens GN=TNKS PE=1 SV=2
0.410026	0.285785	0.199442	0.281727	0.273602	0.0807905	-0.0166907	-0.0248157	-0.217627	0.420895	-0.0243449	0.28052	0.0750686	-0.0480854	0.0110912	-0.150621	-0.273775	-0.214599	-0.159228	-0.00500972	0.123868	-0.0113864	-0.0213026	0.136975	0.00207017	-0.00784603	0.150432			O95273	Cyclin-D1-binding protein 1 OS=Homo sapiens GN=CCNDBP1 PE=1 SV=2
-0.0997773	-0.103356	0.201591	-0.0228978	0.0871092	0.271907	-0.0223837	0.0876233	0.272421	0.0886686	0.104574	0.198906	0.237971	0.0497671	0.0698572	0.107255	-0.0809491	-0.060859	0.0991654	-0.0223103	0.0385043	0.0982043	0.104429	0.118642	0.0597512	0.0659759	0.0801889			O95292	Vesicle-associated membrane protein-associated protein B/C OS=Homo sapiens GN=VAPB PE=1 SV=3
0.15235	-0.17444	0.116366	0.415609	0.302542	0.255875	0.384184	0.271117	0.22445	0.0262168	0.249735	0.152708	0.0471506	0.030218	-0.127156	-0.095736	-0.112669	-0.270043	0.147408	0.0181736	0.0415402	-0.037904	-0.0895892	-0.109808	-0.106945	-0.15863	-0.178849			O95295	SNARE-associated protein Snapin OS=Homo sapiens GN=SNAPIN PE=1 SV=1
-0.151975	-0.462737	-0.268753	-0.229631	-0.131316	-0.175147	0.0648573	0.163172	0.119341	-0.243719	-0.209624	-0.0426505	-0.216472	-0.164465	-0.0856552	-0.0511408	0.000866167	0.079676	-0.117917	-0.136766	-0.249092	-0.0699774	-0.0624049	-0.280921	0.0979476	0.10552	-0.112996	Cell adhesion molecules (CAMs)	ko04514	O95297	Myelin protein zero-like protein 1 OS=Homo sapiens GN=MPZL1 PE=1 SV=1
-0.169071	-0.151861	-0.37162	-0.124017	-0.113769	0.0834337	0.106834	0.117082	0.314284	0.00551567	-0.0254247	-0.0962231	-0.155815	-0.167325	-0.142431	-0.117104	-0.128614	-0.10372	-0.0806499	0.0959488	0.0613834	-0.053824	0.112788	-0.073928	-0.0793848	0.0872272	-0.0994888	Alzheimer's disease;Huntington's disease;Oxidative phosphorylation;Parkinson's disease	ko00190;ko05010;ko05012;ko05016	O95298	NADH dehydrogenase [ubiquinone] 1 subunit C2 OS=Homo sapiens GN=NDUFC2 PE=1 SV=1
-0.034735	-0.0206325	0.185164	0.17577	0.107785	0.260914	0.132505	0.0645195	0.217648	0.207464	0.132308	0.128223	0.129236	-0.0243627	0.134983	-0.0267623	-0.180361	-0.0210153	0.154966	0.0360659	-0.0204765	0.400943	0.142759	0.223809	0.344091	0.0859072	0.166957	Alzheimer's disease;Huntington's disease;Oxidative phosphorylation;Parkinson's disease	ko00190;ko05010;ko05012;ko05016	O95299	NADH dehydrogenase [ubiquinone] 1 alpha subcomplex subunit 10, mitochondrial OS=Homo sapiens GN=NDUFA10 PE=1 SV=1
0.164024	-0.119108	-0.282109	-0.0141735	-0.083355	-0.192717	0.0648908	-0.00429067	-0.113653	-0.285722	-0.308417	-0.2602	0.212018	-0.188851	0.0175795	0.496798	0.0959287	0.302359	-0.408918	-0.216334	-0.202427	0.374991	0.3797	0.0847644	0.650884	0.655593	0.360657			O95302	Peptidyl-prolyl cis-trans isomerase FKBP9 OS=Homo sapiens GN=FKBP9 PE=1 SV=2
0.12617	-0.133858	0.190586	0.367119	-0.184371	0.185459	0.306153	-0.245337	0.124493	0.15548	0.120758	0.0759059	0.10296	-0.0703512	0.0404422	-0.0144213	-0.187732	-0.0769391	0.337594	0.390381	0.163089	0.276619	0.283877	0.180134	-0.0204023	-0.0131443	-0.116887	Pentose phosphate pathway	ko00030	O95336	6-phosphogluconolactonase OS=Homo sapiens GN=PGLS PE=1 SV=2
-0.257119	-0.222874	-0.183933	-0.47209	-0.354215	-0.463442	-0.250781	-0.132906	-0.242133	-0.117255	-0.357104	-0.270483	-0.453155	-0.588268	-0.447692	-0.204874	-0.339987	-0.199411	-0.122214	-0.160989	-0.19157	-0.483019	-0.625923	-0.592841	-0.324761	-0.467665	-0.434583	Cell cycle - yeast	ko04111	O95347	Structural maintenance of chromosomes protein 2 OS=Homo sapiens GN=SMC2 PE=1 SV=2
-0.0701356	-0.00896405	0.00640051	-0.0262207	-0.0685499	0.0580037	-0.00198765	-0.0443169	0.0822367	-0.0182656	0.098302	0.0811389	0.0674493	0.0596403	0.0731695	0.0137242	0.0059152	0.0194444	0.223757	0.182056	0.266887	0.119346	0.104214	0.0849802	-0.104887	-0.120019	-0.139253	Regulation of autophagy	ko04140	O95352	Ubiquitin-like modifier-activating enzyme ATG7 OS=Homo sapiens GN=ATG7 PE=1 SV=1
-0.128364	-0.169244	-0.115745	0.46794	0.241338	0.498704	0.605724	0.379122	0.636488	0.156323	0.171912	0.122424	-0.221559	-0.297227	-0.243719	-0.371779	-0.447447	-0.393939	0.207618	0.195464	0.109582	0.12454	0.103704	0.0237195	-0.046348	-0.067184	-0.147169			O95359	Transforming acidic coiled-coil-containing protein 2 OS=Homo sapiens GN=TACC2 PE=1 SV=3
0.792896	0.648963	0.614069	0.816412	0.61403	0.647114	0.131103	-0.0712793	-0.0381953	0.543439	0.506769	0.639646	0.514269	0.382972	0.405867	-0.0490157	-0.180313	-0.157418	0.661137	0.516134	0.702793	0.234713	0.275363	0.583751	-0.391975	-0.351325	-0.042937			O95361	Tripartite motif-containing protein 16 OS=Homo sapiens GN=TRIM16 PE=1 SV=3
0.363607	0.116329	0.147458	-0.0411328	0.112958	-0.0988858	-0.250264	-0.0961733	-0.308017	0.0446826	0.0407499	-0.0988111	0.185055	0.295853	0.143299	0.189515	0.300313	0.147759	0.217947	-0.180394	0.581969	0.130762	-0.143263	0.507543	-0.0757453	-0.34977	0.301036	Aminoacyl-tRNA biosynthesis	ko00970	O95363	Phenylalanine--tRNA ligase, mitochondrial OS=Homo sapiens GN=FARS2 PE=1 SV=1
0.122969	-0.217659	0.113974	0.437147	-0.0795399	0.47855	0.430719	-0.0859679	0.472122	-0.101815	-0.6786	-0.373001	0.157643	0.11971	0.0985441	0.542115	0.504182	0.483016	0.683875	0.489008	0.675393	0.162888	0.117207	-0.193086	-0.453204	-0.498885	-0.809178			O95365	Zinc finger and BTB domain-containing protein 7A OS=Homo sapiens GN=ZBTB7A PE=1 SV=1
0.182609	0.0518329	0.115829	-0.101672	0.00759743	0.0764387	-0.218429	-0.10916	-0.0403183	0.235921	0.233014	0.177554	-0.151464	-0.143789	-0.309427	-0.36696	-0.359285	-0.524923	0.124679	0.352853	0.336296	-0.0956545	0.206649	0.0780759	-0.366931	-0.064627	-0.1932	Glycerophospholipid metabolism	ko00564	O95372	Acyl-protein thioesterase 2 OS=Homo sapiens GN=LYPLA2 PE=1 SV=1
0.0456893	-0.0254267	-0.129449	-0.0847975	-0.143794	-0.097794	-0.048402	-0.107399	-0.0613985	-0.0733994	-0.123565	-0.102115	0.0124653	0.0646892	-0.0393983	0.112158	0.164382	0.0602948	0.0433827	-0.11704	-0.074076	0.0531046	0.0845927	0.064207	0.102349	0.133837	0.113451			O95373	Importin-7 OS=Homo sapiens GN=IPO7 PE=1 SV=1
-0.224932	-0.124012	-0.23362	-0.161983	-0.0795217	-0.132108	0.032205	0.114666	0.06208	-0.302796	-0.096241	-0.0431907	0.0011523	0.215035	0.201846	0.148562	0.362444	0.349255	0.00531295	-0.0545643	-0.0708586	0.130826	0.227907	0.178858	0.170863	0.267944	0.218895			O95376	E3 ubiquitin-protein ligase ARIH2 OS=Homo sapiens GN=ARIH2 PE=1 SV=1
0.401382	0.262618	0.197692	0.114975	-0.0361154	0.332611	-0.172256	-0.323346	0.0453803	-0.491632	-0.430777	-0.419124	-0.56631	-0.802339	-0.648058	-0.119132	-0.355161	-0.20088	-0.0243972	-0.269777	-0.158937	-0.13068	-0.183624	-0.0456878	0.0203571	-0.0325869	0.105349	MAPK signaling pathway	ko04010	O95382	Mitogen-activated protein kinase kinase kinase 6 OS=Homo sapiens GN=MAP3K6 PE=1 SV=3
-0.205833	0.0522943	0.0690636	0.636233	0.650742	0.570758	0.664391	0.6789	0.598916	-0.162871	-0.306295	-0.218544	-0.089981	-0.254176	-0.282507	0.139256	-0.0249393	-0.0532703	-0.234802	-0.267692	-0.272435	-0.307232	-0.402985	-0.41384	-0.0489223	-0.144675	-0.15553	Spliceosome	ko03040	O95391	Pre-mRNA-splicing factor SLU7 OS=Homo sapiens GN=SLU7 PE=1 SV=2
0.0953156	0.00683513	-0.0244668	-0.167184	-0.0723644	-0.104077	-0.193079	-0.098259	-0.129972	-0.0204416	-0.0746602	-0.0563689	0.0384879	-0.0975075	-0.0404847	0.0889781	-0.0470173	0.0100055	0.0209835	0.0360188	0.0455161	0.0971163	0.00692143	-0.0032471	0.0629435	-0.0272514	-0.0374199	Amino sugar and nucleotide sugar metabolism	ko00520	O95394	Phosphoacetylglucosamine mutase OS=Homo sapiens GN=PGM3 PE=1 SV=1
0.316054	0.286686	0.508478	0.0118753	0.228455	0.325931	-0.358531	-0.141951	-0.044475	0.375116	0.254381	0.236477	0.344168	0.246643	0.192248	0.05551	-0.042015	-0.09641	0.222115	0.246081	0.135422	0.180197	0.290538	0.200831	-0.021009	0.089332	-0.000375	Sulfur relay system	ko04122	O95396	Adenylyltransferase and sulfurtransferase MOCS3 OS=Homo sapiens GN=MOCS3 PE=1 SV=1
0.00809289	0.0303883	-0.0191382	0.11249	0.234288	0.249753	0.106042	0.22784	0.243305	0.10444	0.0971987	0.0363774	0.214567	0.0958525	0.0724319	0.135228	0.0165138	-0.0069068	-0.0693614	-0.207118	-0.159429	0.0379145	-0.0484031	-0.120225	0.183217	0.0968997	0.0250778			O95400	CD2 antigen cytoplasmic tail-binding protein 2 OS=Homo sapiens GN=CD2BP2 PE=1 SV=1
0.369489	0.228744	0.105001	0.102405	0.34746	-0.215575	-0.132006	0.113049	-0.449986	0.50539	0.288632	0.28417	0.568254	0.234718	0.208834	0.208857	-0.124679	-0.150563	-0.830189	0.298183	-0.315879	0.0976999	-1.15262	0.337644	0.380328	-0.869992	0.620272			O95402	Mediator of RNA polymerase II transcription subunit 26 OS=Homo sapiens GN=MED26 PE=1 SV=2
0.55858	0.109469	0.372835	0.488466	0.516591	0.343336	0.141505	0.16963	-0.00362533	0.354232	0.153615	0.321559	0.221055	-0.0578414	0.137282	-0.0554137	-0.33431	-0.139187	0.239127	0.452103	0.340164	0.467615	0.442059	0.516065	0.123817	0.098261	0.172267	Endocytosis;TGF-beta signaling pathway	ko04144;ko04350	O95405	Zinc finger FYVE domain-containing protein 9 OS=Homo sapiens GN=ZFYVE9 PE=1 SV=2
0.590221	1.40984	0.941503	0.620575	1.27664	0.843671	-0.359946	0.296119	-0.13685	0.0754583	-0.372108	-0.551071	0.127822	-0.378426	-0.133288	0.410396	-0.0958524	0.149286	0.00288205	-0.481218	0.226773	-0.219402	0.266526	-0.0543534	-0.135548	0.35038	0.0295009			O95425	Supervillin OS=Homo sapiens GN=SVIL PE=1 SV=2
-0.188134	0.120997	0.346442	0.275846	0.00991487	0.628748	0.182744	-0.0831868	0.535646	0.0687345	0.443625	0.113149	-0.829962	-0.176705	-0.109833	-1.03846	-0.385208	-0.318336	0.0466607	0.132285	0.270069	0.00954924	0.283295	0.320025	-0.140122	0.133623	0.170353	Glycosylphosphatidylinositol(GPI)-anchor biosynthesis	ko00563	O95427	GPI ethanolamine phosphate transferase 1 OS=Homo sapiens GN=PIGN PE=1 SV=1
0.163598	-0.0476258	-0.0148746	-0.174386	-0.121753	-0.377261	-0.208085	-0.155452	-0.41096	-0.0500103	-0.167736	0.0191953	0.257808	-0.0415941	0.0950394	0.323992	0.0245896	0.161223	0.130565	-0.0845121	0.0540998	0.187089	-0.0836126	0.0226968	0.153705	-0.116997	-0.0106874			O95429	BAG family molecular chaperone regulator 4 OS=Homo sapiens GN=BAG4 PE=1 SV=1
0.0136782	0.0160461	-0.0624013	-0.0375031	-0.0737276	-0.0605484	-0.0266108	-0.0628353	-0.0496561	-0.15952	-0.0343869	-0.138163	-0.0938074	0.0944269	-0.11594	0.0168826	0.205117	-0.00525003	0.0494962	-0.0117472	0.104892	0.0653384	0.0237383	0.144287	0.0177914	-0.0238087	0.09674			O95433	Activator of 90 kDa heat shock protein ATPase homolog 1 OS=Homo sapiens GN=AHSA1 PE=1 SV=1
0.106419	-0.00789751	0.161862	-0.048174	-0.0961011	0.0568066	-0.134968	-0.182896	-0.0299879	0.0311084	0.0271499	0.00141616	0.0735137	0.0814979	0.169797	0.0536222	0.0616064	0.149906	0.0160788	0.0495981	0.0519427	-0.0100093	0.020498	0.0353802	-0.0492158	-0.0187085	-0.00382633	RNA degradation	ko03018	O95453	Poly(A)-specific ribonuclease PARN OS=Homo sapiens GN=PARN PE=1 SV=1
-0.184732	-0.122563	-0.169376	-0.235135	-0.34211	-0.266668	-0.0762447	-0.18322	-0.107778	-0.0498374	-0.0839386	-0.239993	0.0334686	-0.0524232	-0.175888	0.158058	0.0721665	-0.0512983	0.0321362	0.0720402	0.0248625	-0.179521	-0.126172	-0.099459	-0.222534	-0.169185	-0.142472			O95456	Proteasome assembly chaperone 1 OS=Homo sapiens GN=PSMG1 PE=1 SV=1
0.230943	0.268764	0.091212	0.244574	0.330086	0.240313	0.047601	0.133113	0.04334	0.307275	0.404354	0.187906	0.279327	0.252859	0.121345	-0.020518	-0.046986	-0.1785	0.263175	0.30109	0.153144	0.424289	0.369507	0.170766	0.185153	0.130371	-0.0683703	Sphingolipid metabolism	ko00600	O95470	Sphingosine-1-phosphate lyase 1 OS=Homo sapiens GN=SGPL1 PE=1 SV=3
0.0333649	0.211502	0.230756	-0.0477415	0.173421	0.0271725	-0.206282	0.01488	-0.131368	0.150993	0.155499	0.128225	0.32614	0.222912	0.240719	0.181234	0.0780063	0.0958133	-0.00333808	0.0337781	0.0270167	0.162717	0.0530156	0.3088	0.143565	0.0338634	0.289648			O95478	Ribosome biogenesis protein NSA2 homolog OS=Homo sapiens GN=NSA2 PE=1 SV=1
-0.0928303	-0.108783	-0.0643825	-0.0416521	-0.0308525	0.115194	0.0470132	0.0578128	0.203859	-0.0343954	-0.079475	-0.0923762	-0.00688024	-0.0705449	-0.0167394	0.0618686	-0.00179603	0.0520095	0.0607918	-0.00895075	-0.0991885	0.0728294	0.0193096	-0.0602155	0.0886119	0.0350921	-0.044433	Pentose phosphate pathway	ko00030	O95479	GDH/6PGL endoplasmic bifunctional protein OS=Homo sapiens GN=H6PD PE=1 SV=2
0.0307199	0.0352618	-0.0406752	0.0562143	-0.037987	-0.0699136	0.0477788	-0.0464225	-0.0783491	0.0230104	0.0457364	-0.00666121	0.0294313	-0.0219801	0.00926607	0.0087361	-0.0426753	-0.0114291	0.0551732	-0.0192602	0.0290448	-0.0156342	0.0342037	-0.0376075	-0.0372868	0.0125511	-0.0592601	Protein processing in endoplasmic reticulum	ko04141	O95486	Protein transport protein Sec24A OS=Homo sapiens GN=SEC24A PE=1 SV=2
0.0990142	0.109541	0.193188	0.110374	-0.0540262	0.131009	-0.0235404	-0.187941	-0.0029054	-0.0167386	0.134089	0.223116	0.0138631	0.139116	0.186431	-0.0996257	0.0256272	0.0729422	0.0569162	0.0656271	0.00115033	0.118634	0.036244	0.0302539	0.0774028	-0.00498721	-0.0109773	Protein processing in endoplasmic reticulum	ko04141	O95487	Protein transport protein Sec24B OS=Homo sapiens GN=SEC24B PE=1 SV=2
-0.283847	0.213264	-0.2209	-0.241512	-0.00764604	-0.536533	-0.144351	0.089515	-0.439372	-0.0126025	0.0353014	-0.0276301	-0.238551	-0.312705	-0.0472978	-0.236907	-0.311061	-0.0456541	-0.0877608	-0.135471	-0.0566549	-0.516027	-0.59026	-1.00646	-0.422731	-0.496964	-0.913164			O95503	Chromobox protein homolog 6 OS=Homo sapiens GN=CBX6 PE=1 SV=1
0.375589	0.295384	0.500128	-0.274128	-0.343102	-0.265509	-0.664495	-0.733469	-0.655876	0.451018	0.39375	0.653996	-0.13599	0.236526	0.736159	-0.635578	-0.263062	0.236571	0.60962	0.85166	0.585851	0.928312	0.805675	0.547129	0.245935	0.123298	-0.135248	Nicotinate and nicotinamide metabolism	ko00760	O95544	NAD kinase OS=Homo sapiens GN=NADK PE=1 SV=1
-0.412457	-0.139176	-0.395464	-0.245863	-0.278592	-0.429891	0.069836	0.037107	-0.114192	-0.413418	-0.334585	-0.28387	-0.377367	-0.51801	-0.329232	-0.0334093	-0.174052	0.0147257	-0.294888	-0.328167	-0.0549585	-0.344908	-0.269219	-0.386785	-0.118904	-0.0432145	-0.160781			O95551	Tyrosyl-DNA phosphodiesterase 2 OS=Homo sapiens GN=TDP2 PE=1 SV=1
0.0325521	0.0769785	2.7601e-05	0.0746715	0.227056	0.0847231	0.0381521	0.190537	0.0482037	-0.0215656	0.143409	-0.119492	0.212563	-0.0515155	-0.141016	0.211779	-0.0522993	-0.1418	-0.0302005	-0.199165	-0.195042	0.32026	0.157172	0.0200246	0.461729	0.298641	0.161494			O95563	Mitochondrial pyruvate carrier 2 OS=Homo sapiens GN=MPC2 PE=1 SV=1
0.24418	0.172385	0.186005	0.44332	0.288572	0.326869	0.242463	0.0877153	0.126012	0.137485	0.250476	0.0457147	-0.210973	-0.104928	-0.179312	-0.355532	-0.249487	-0.323871	0.0498126	-0.0655936	-0.0281088	0.131691	-0.00627831	0.0367436	0.146321	0.00835162	0.0513735			O95571	Persulfide dioxygenase ETHE1, mitochondrial OS=Homo sapiens GN=ETHE1 PE=1 SV=2
-0.252991	-0.33489	-0.302459	-0.213418	-0.291595	-0.306889	0.083362	0.005185	-0.010109	-0.187226	-0.24357	-0.1891	-0.250023	-0.359972	-0.283062	-0.043391	-0.15334	-0.07643	0.0708421	-0.0534626	-0.0402836	0.0755888	-0.0806742	-0.0627074	0.0832235	-0.0730395	-0.0550727	Adipocytokine signaling pathway;Fatty acid metabolism;Peroxisome;PPAR signaling pathway	ko00071;ko03320;ko04146;ko04920	O95573	Long-chain-fatty-acid--CoA ligase 3 OS=Homo sapiens GN=ACSL3 PE=1 SV=3
-0.138056	-0.301913	-0.310348	-0.0158099	-0.251817	-0.274436	0.234296	-0.00171133	-0.0243303	-0.209256	-0.280509	-0.0551535	0.0333569	-0.0150752	0.0769615	0.214996	0.166564	0.258601	-0.166211	-0.161915	-0.234426	0.00239839	0.134155	0.101861	0.189916	0.321672	0.289378	Purine metabolism;Pyrimidine metabolism;RNA polymerase	ko00230;ko00240;ko03020	O95602	DNA-directed RNA polymerase I subunit RPA1 OS=Homo sapiens GN=POLR1A PE=1 SV=2
0.141961	0.109486	0.074049	0.115886	0.205913	0.283354	0.00738733	0.0974143	0.174855	0.0531498	-0.0367667	0.129726	0.109572	-0.170942	-0.0628547	0.060869	-0.219645	-0.111558	0.0329052	-0.211379	0.28889	0.0735302	-0.0877483	-0.0530062	0.0367248	-0.124554	-0.0898116			O95613	Pericentrin OS=Homo sapiens GN=PCNT PE=1 SV=4
0.0150837	0.0179423	0.0472721	-0.175745	-0.127149	0.0513709	-0.202511	-0.153915	0.0246049	0.0119859	-0.061383	0.0114003	-0.0808082	0.0188327	-0.0493147	-0.0681426	0.0314983	-0.0366491	-0.240039	-0.0272488	-0.140694	-0.0812647	-0.0705857	-0.172998	0.0547292	0.0654082	-0.0370041			O95619	YEATS domain-containing protein 4 OS=Homo sapiens GN=YEATS4 PE=1 SV=1
0.278716	0.109455	-0.276085	0.0549358	-0.262402	-0.334814	0.0175738	-0.299764	-0.372176	0.354603	0.0642001	0.459432	0.239789	-0.0959206	0.106287	-0.052956	-0.388666	-0.186458	-0.165821	-0.42323	0.230025	0.0776843	0.0078303	0.376324	0.19736	0.127506	0.495999			O95625	Zinc finger and BTB domain-containing protein 11 OS=Homo sapiens GN=ZBTB11 PE=1 SV=2
0.101627	0.0927101	0.0478562	0.221513	0.36197	0.173443	0.140782	0.281239	0.0927119	0.323626	0.355157	0.339944	0.335488	0.464371	0.359717	-0.00408767	0.124795	0.0201413	0.0269447	0.0534918	0.0699226	0.0228745	0.0297481	0.152141	-0.0272452	-0.0203716	0.102021	RNA degradation	ko03018	O95628	CCR4-NOT transcription complex subunit 4 OS=Homo sapiens GN=CNOT4 PE=1 SV=3
0.0313175	-0.145352	-0.0771026	0.0218974	-0.168013	-0.142405	0.0856098	-0.104301	-0.0786926	-0.0306423	-0.167852	-0.157716	0.186714	-0.0964397	0.0130027	0.305451	0.0222971	0.131739	-0.0607958	-0.121605	-0.0445426	-0.1452	-0.0608296	-0.255783	-0.0695522	0.0148182	-0.180135	Endocytosis	ko04144	O95630	STAM-binding protein OS=Homo sapiens GN=STAMBP PE=1 SV=1
-0.173717	-0.261716	-0.0705517	-0.415399	-0.506027	-0.380343	-0.246737	-0.337365	-0.211681	-0.346547	-0.125431	-0.209017	-0.496001	-0.160017	-0.237602	-0.269003	0.0669813	-0.0106037	-0.219673	-0.276222	-0.282826	-0.383679	-0.370889	-0.395638	-0.124105	-0.111315	-0.136064	mRNA surveillance pathway	ko03015	O95639	Cleavage and polyadenylation specificity factor subunit 4 OS=Homo sapiens GN=CPSF4 PE=1 SV=1
-0.223319	-0.373844	0.159276	1.19175	-0.54348	1.53758	1.33771	-0.397518	1.68354	-0.152069	0.271357	-0.00812058	-0.194536	0.0929888	0.0557758	-0.231592	0.055933	0.01872	0.214653	0.0025534	-0.0947826	0.496785	0.465957	0.374105	0.455977	0.425149	0.333297	Axon guidance;B cell receptor signaling pathway;Natural killer cell mediated cytotoxicity;T cell receptor signaling pathway;VEGF signaling pathway;Wnt signaling pathway	ko04310;ko04360;ko04370;ko04650;ko04660;ko04662	O95644	Nuclear factor of activated T-cells, cytoplasmic 1 OS=Homo sapiens GN=NFATC1 PE=1 SV=3
0.264841	0.224454	0.199304	0.156854	0.172929	0.19382	-0.072679	-0.056604	-0.035713	-0.00398145	0.0237803	0.0117846	0.194862	0.330965	0.23945	0.184334	0.320437	0.228922	0.0219845	0.131307	0.107534	0.253537	0.346831	0.380786	0.166595	0.259889	0.293844			O95671	N-acetylserotonin O-methyltransferase-like protein OS=Homo sapiens GN=ASMTL PE=1 SV=3
-0.318665	0.0375702	0.0805676	0.864584	1.00675	0.873192	0.931426	1.07359	0.940034	-0.0590481	-0.0435982	0.22397	-0.256995	-0.172251	0.149509	-0.297436	-0.212692	0.109068	0.598796	0.553127	0.590042	0.661012	0.362822	0.658116	0.080357	-0.217833	0.077461	Glycerophospholipid metabolism;Phosphatidylinositol signaling system	ko00564;ko04070	O95674	Phosphatidate cytidylyltransferase 2 OS=Homo sapiens GN=CDS2 PE=1 SV=1
0.357284	0.214866	0.346677	-0.0320082	-0.0909855	0.00199729	-0.338284	-0.397261	-0.304278	0.0345906	0.146853	0.0257467	0.0757798	0.213227	0.195116	0.00671637	0.144164	0.126053	0.0473	-0.030474	0.127045	0.248074	-0.192039	0.0981967	0.200117	-0.239996	0.0502397			O95684	FGFR1 oncogene partner OS=Homo sapiens GN=FGFR1OP PE=1 SV=1
0.0811956	0.238332	0.206531	0.278824	0.51749	0.46979	0.103471	0.342137	0.294437	0.0804564	0.131224	-0.051339	0.55654	0.576219	0.486209	0.503093	0.522772	0.432762	0.242382	0.251461	0.280159	0.33124	0.432758	0.463635	0.0732393	0.174757	0.205634	Insulin signaling pathway	ko04910	O95685	Protein phosphatase 1 regulatory subunit 3D OS=Homo sapiens GN=PPP1R3D PE=1 SV=1
-0.161691	0.00199004	-0.0695407	-0.0411022	-0.0262801	0.210557	0.0353117	0.0501338	0.286971	0.0514778	-0.0450268	0.0608941	-0.00993805	-0.189289	-0.0594565	-0.0323864	-0.211737	-0.0819049	-0.161786	-0.0865227	-0.154209	-0.274016	-0.197281	-0.36992	-0.139843	-0.0631084	-0.235747			O95696	Bromodomain-containing protein 1 OS=Homo sapiens GN=BRD1 PE=1 SV=1
-0.0760953	-0.0582382	0.077828	-0.00129482	0.0535868	0.0210774	0.0175403	0.072422	0.0399126	0.133317	0.0952045	0.0747698	-0.062014	0.0328325	-0.123	-0.163111	-0.0682646	-0.224097	0.150836	0.0750706	0.158269	0.13855	0.0670972	0.151149	0.0104915	-0.0609613	0.0230905	Ribosome biogenesis in eukaryotes;RNA transport	ko03008;ko03013	O95707	Ribonuclease P protein subunit p29 OS=Homo sapiens GN=POP4 PE=1 SV=2
0.031631	0.0683286	0.102353	0.294981	0.333311	0.419544	0.227543	0.265873	0.352106	-0.131969	-0.20417	-0.129682	-0.0590138	-0.0240522	-0.121724	0.0962599	0.131221	0.0335497	0.0440732	0.0683785	0.0554615	0.153956	0.199026	0.0904297	0.0979849	0.143055	0.0344586	Ubiquitin mediated proteolysis	ko04120	O95714	E3 ubiquitin-protein ligase HERC2 OS=Homo sapiens GN=HERC2 PE=1 SV=2
-0.339268	-0.165423	-0.19205	-0.321265	-0.194445	-0.36326	-0.089018	0.037802	-0.131013	-0.152341	-0.14258	-0.0237638	0.0601096	-0.177212	0.0105282	0.166338	-0.0709837	0.116756	-0.152201	-0.217761	-0.0955862	-0.0860184	-0.203047	-0.126788	0.0691643	-0.0478643	0.0283947	Pancreatic secretion	ko04972	O95716	Ras-related protein Rab-3D OS=Homo sapiens GN=RAB3D PE=1 SV=1
0.219107	0.129843	-0.034464	0.206883	0.201975	0.104952	0.102054	0.0971463	0.000123333	0.154808	0.0828062	0.117994	0.184725	0.286213	0.214362	0.0661889	0.167677	0.0958259	0.146574	0.220433	0.0868966	0.039041	0.149959	-0.0496688	-0.11226	-0.0013422	-0.20097	SNARE interactions in vesicular transport	ko04130	O95721	Synaptosomal-associated protein 29 OS=Homo sapiens GN=SNAP29 PE=1 SV=1
0.0180428	0.00738064	-0.0738003	-0.000919917	0.0187763	-0.0358652	0.0152057	0.0349019	-0.0197396	0.150706	-0.0344072	-0.0639207	0.22774	0.124987	0.121682	0.210281	0.107528	0.104223	-0.00958825	-0.00299636	0.0207837	0.0306792	0.117806	0.166134	0.0279462	0.115073	0.163401			O95747	Serine/threonine-protein kinase OSR1 OS=Homo sapiens GN=OXSR1 PE=1 SV=1
-0.691159	-0.337777	-0.473205	-0.688312	-0.268617	-0.457777	-0.187598	0.232097	0.0429367	-0.0561971	-0.252871	-0.161964	0.0756901	-0.0539272	0.153455	0.232701	0.103083	0.310466	-0.0510647	-0.0954433	-0.0373089	-0.146993	0.189403	0.0554073	-0.0857207	0.250675	0.11668	Terpenoid backbone biosynthesis	ko00900	O95749	Geranylgeranyl pyrophosphate synthase OS=Homo sapiens GN=GGPS1 PE=1 SV=1
-0.0890751	-0.0828534	-0.144196	-0.0374335	-0.0148328	-0.12122	0.0679413	0.090542	-0.0158452	-0.0274983	-0.102991	-0.133012	0.0484928	0.164536	-0.00132627	0.136327	0.25237	0.0865075	-0.120233	-0.094655	-0.117941	0.0148406	0.0248106	0.0420182	0.125784	0.135754	0.152961	Protein processing in endoplasmic reticulum	ko04141	O95757	Heat shock 70 kDa protein 4L OS=Homo sapiens GN=HSPA4L PE=1 SV=3
0.154778	-0.0483919	-0.0185055	-0.176784	-0.337262	-0.481501	-0.206078	-0.366556	-0.510795	-0.130122	-0.0900018	-0.218257	-0.354067	-0.348988	-0.246017	-0.20794	-0.202861	-0.0998901	-0.135789	0.125368	0.0245915	-0.528847	-0.481562	-0.375597	-0.53357	-0.486285	-0.380321			O95758	Polypyrimidine tract-binding protein 3 OS=Homo sapiens GN=PTBP3 PE=1 SV=2
-0.0364111	0.0830363	0.00145466	0.0324835	0.0973757	-0.0784784	0.0164569	0.0813491	-0.094505	-0.177393	-0.10538	0.111782	-0.201318	-0.132226	-0.0768079	-0.144321	-0.075229	-0.0198109	-0.105596	-0.137643	-0.0805562	-0.051625	-0.027771	-0.0040643	0.0563067	0.0801607	0.103867	RNA degradation;Spliceosome	ko03018;ko03040	O95777	U6 snRNA-associated Sm-like protein LSm8 OS=Homo sapiens GN=LSM8 PE=1 SV=3
0.0242127	0.150168	0.104253	0.109028	0.0310824	0.126687	0.0161501	-0.0617955	0.0338091	-0.00777243	0.0323442	-0.0227948	0.143638	0.254167	0.0975263	0.143046	0.253575	0.096934	0.0527469	0.0610828	0.150385	0.297025	0.278097	0.395115	0.208953	0.190025	0.307043	Endocrine and other factor-regulated calcium reabsorption;Endocytosis;Huntington's disease	ko04144;ko04961;ko05016	O95782	AP-2 complex subunit alpha-1 OS=Homo sapiens GN=AP2A1 PE=1 SV=3
-0.109931	-0.00574313	-0.0437926	0.012508	0.224414	0.229341	0.0656636	0.27757	0.282497	0.0027668	-0.179964	-0.0770575	-0.000875586	-0.121936	-0.149685	0.083876	-0.0371844	-0.0649334	-0.193211	-0.24836	-0.168057	-0.234585	-0.264662	-0.211186	-0.0313757	-0.0614527	-0.00797667			O95785	Protein Wiz OS=Homo sapiens GN=WIZ PE=1 SV=2
0.133694	-0.0127695	0.115364	-0.370978	-0.304935	-0.325729	-0.449741	-0.383698	-0.404492	0.407425	0.667752	0.719725	0.0790468	0.498011	0.493922	-0.519254	-0.10029	-0.104379	-0.26019	-0.245933	-0.246727	-0.444516	-0.225335	-0.337025	-0.193566	0.025615	-0.086075	Cytosolic DNA-sensing pathway;Hepatitis C;Measles;RIG-I-like receptor signaling pathway	ko04622;ko04623;ko05160;ko05162	O95786	Probable ATP-dependent RNA helicase DDX58 OS=Homo sapiens GN=DDX58 PE=1 SV=2
-0.00312942	0.0131648	0.0193952	-0.0877549	-0.16567	-0.11835	-0.0975651	-0.17548	-0.12816	-0.0922214	-0.127069	-0.0773711	-0.225658	-0.281462	-0.210176	-0.126771	-0.182575	-0.111289	0.00464757	0.000768123	-0.0566457	-0.188336	-0.217003	-0.200738	-0.171259	-0.199926	-0.183661			O95793	Double-stranded RNA-binding protein Staufen homolog 1 OS=Homo sapiens GN=STAU1 PE=1 SV=2
-0.150498	-0.0945409	-0.53614	-0.114317	-0.253135	-0.233446	0.146076	0.00725797	0.026947	-0.109948	-0.325467	-0.48158	-0.0681769	-0.419298	-0.438828	0.237488	-0.113633	-0.133163	0.054655	-0.266472	-0.268565	-0.0675108	-0.373986	-0.445894	0.0926165	-0.213859	-0.285767			O95801	Tetratricopeptide repeat protein 4 OS=Homo sapiens GN=TTC4 PE=1 SV=3
0.0715205	0.0391489	0.090138	0.148007	-0.1052	-0.0907288	0.0810712	-0.172136	-0.157665	0.0201296	-0.0116942	-0.050437	-0.0211698	-0.085634	-0.0227558	-0.00716927	-0.0716335	-0.00875527	0.0529536	-0.00953741	-0.0604275	0.0971628	-0.0292434	0.0256982	0.102833	-0.023573	0.0313686	Protein processing in endoplasmic reticulum	ko04141	O95816	BAG family molecular chaperone regulator 2 OS=Homo sapiens GN=BAG2 PE=1 SV=1
0.0545538	0.0259825	-0.0780815	-0.0691463	-0.0387899	-0.0548961	-0.0699646	-0.0396082	-0.0557144	0.197879	0.223927	0.181774	0.0452137	0.0895433	0.0889934	-0.15598	-0.11165	-0.1122	0.137755	0.106237	0.200688	0.00769987	-0.0440386	-0.00991393	-0.140527	-0.192265	-0.158141			O95817	BAG family molecular chaperone regulator 3 OS=Homo sapiens GN=BAG3 PE=1 SV=3
0.223069	0.0450695	0.10059	0.0416829	0.0453423	-0.133509	-0.0812266	-0.0775672	-0.256418	-0.0870951	-0.0364271	-0.239694	-0.234198	-0.186221	-0.198818	-0.113126	-0.0651489	-0.0777459	-0.211791	-0.275021	-0.110077	-0.215192	-0.328361	-0.185387	-0.016229	-0.129398	0.013576	MAPK signaling pathway	ko04010	O95819	Mitogen-activated protein kinase kinase kinase kinase 4 OS=Homo sapiens GN=MAP4K4 PE=1 SV=2
0.156106	0.0988284	0.106607	0.303209	0.291558	0.309314	0.182695	0.171044	0.1888	-0.0685739	0.0959899	-0.0941318	0.256297	0.248469	-0.0659773	0.278536	0.270708	-0.0437387	-0.154204	-0.0721	-0.212837	0.255094	0.191682	0.224223	0.401474	0.338062	0.370603	beta-Alanine metabolism;Peroxisome;Propanoate metabolism	ko00410;ko00640;ko04146	O95822	Malonyl-CoA decarboxylase, mitochondrial OS=Homo sapiens GN=MLYCD PE=1 SV=3
0.111344	0.141588	0.160637	0.141534	0.208063	0.165185	0.00367767	0.0702067	0.0273287	0.275675	0.136554	0.10857	0.133669	0.0182939	0.0228399	-0.0399307	-0.155306	-0.15076	-0.0439086	0.0523778	0.0205532	0.0409254	-0.00874994	-0.045261	0.0312513	-0.0184241	-0.0549351			O95825	Quinone oxidoreductase-like protein 1 OS=Homo sapiens GN=CRYZL1 PE=1 SV=2
-0.147898	-0.186403	-0.0638266	0.0139671	0.00492458	-0.0180923	0.146676	0.137634	0.114617	-0.134064	0.0568195	-0.0570405	-0.352562	-0.235162	-0.146974	-0.3078	-0.1904	-0.102212	-0.179107	-0.106737	-0.195012	-0.0338962	0.00270231	-0.00335224	0.126389	0.162988	0.156933	Apoptosis	ko04210	O95831	Apoptosis-inducing factor 1, mitochondrial OS=Homo sapiens GN=AIFM1 PE=1 SV=1
0.0450805	0.134897	0.170185	0.0546873	0.0710044	-0.0290428	-0.0620335	-0.0457164	-0.145764	0.192533	0.161535	0.263785	0.107744	0.0380761	0.0116736	-0.098207	-0.167875	-0.194277	0.192361	0.277797	0.206773	0.037343	0.256538	0.147293	-0.188301	0.0308943	-0.0783507			O95834	Echinoderm microtubule-associated protein-like 2 OS=Homo sapiens GN=EML2 PE=1 SV=1
-0.620702	-0.364852	-0.6467	0.00863617	0.349347	-0.160305	0.552721	0.893432	0.38378	0.0110656	0.345749	0.284154	0.105284	0.338696	0.356367	-0.108372	0.12504	0.142711	0.360616	0.155037	0.131885	0.203209	0.12889	0.114043	-0.012637	-0.086956	-0.101803			O95835	Serine/threonine-protein kinase LATS1 OS=Homo sapiens GN=LATS1 PE=1 SV=1
-0.410399	-0.392573	-0.406219	-0.112355	-0.195973	-0.275933	0.290709	0.207091	0.127131	-0.0565651	-0.289127	-0.0993034	-0.0513902	-0.290724	-0.142992	0.0969416	-0.142392	0.00533983	-0.1328	-0.276671	-0.348467	0.0125512	-0.231149	-0.158727	0.265197	0.021497	0.093919			O95848	Uridine diphosphate glucose pyrophosphatase OS=Homo sapiens GN=NUDT14 PE=1 SV=2
-0.0598839	0.0103822	-0.0127536	-0.220756	-0.2102	-0.187241	-0.200004	-0.189448	-0.166489	-0.0736713	-0.0111526	-0.00223822	-0.34507	-0.220248	-0.304894	-0.316049	-0.191227	-0.275873	0.0539981	-0.0842579	0.0652832	-0.321728	-0.289131	-0.288145	-0.333402	-0.300805	-0.299819	Sulfur metabolism	ko00920	O95861	3'(2'),5'-bisphosphate nucleotidase 1 OS=Homo sapiens GN=BPNT1 PE=1 SV=1
-1.3124	-1.11902	-1.13275	-1.58188	-1.17237	-1.44793	-0.393823	0.0156867	-0.259873	-0.420153	-0.363016	-0.29844	-0.922758	-0.72457	-0.847181	-0.562222	-0.364034	-0.486645	-0.139799	0.10708	-0.000409411	-0.273523	-0.0464272	-0.114203	-0.26248	-0.0353844	-0.10316	alpha-Linolenic acid metabolism;Biosynthesis of unsaturated fatty acids;PPAR signaling pathway	ko00592;ko01040;ko03320	O95864	Fatty acid desaturase 2 OS=Homo sapiens GN=FADS2 PE=1 SV=1
-0.0488424	-0.0979973	-0.12721	-0.0678421	-0.108966	-0.0453808	0.0235078	-0.0176161	0.0459691	0.117247	0.0213959	0.0298456	0.341317	0.0623843	0.194165	0.285154	0.00622147	0.138002	-0.121162	-0.088484	-0.0880368	-0.175375	-0.129825	-0.208904	-0.0761474	-0.0305974	-0.109676			O95865	N(G),N(G)-dimethylarginine dimethylaminohydrolase 2 OS=Homo sapiens GN=DDAH2 PE=1 SV=1
-0.136078	0.0354547	0.0370765	-0.0183439	-0.0789367	0.0058439	0.00283837	-0.0577544	0.0270262	0.219282	-0.0609852	-0.0834344	0.167106	-0.133544	0.0183467	0.142152	-0.158498	-0.00660743	-0.00097632	-0.00735911	0.13017	0.22084	0.0926731	0.205875	0.180228	0.0520616	0.165263			O95870	Protein ABHD16A OS=Homo sapiens GN=ABHD16A PE=1 SV=3
0.211919	-0.188977	-0.136348	-0.0423357	-0.467592	-0.181784	-0.0045337	-0.42979	-0.143982	-0.272991	-0.266898	-0.185459	-0.354582	-0.595741	-0.401882	-0.112799	-0.353958	-0.160099	-0.0117482	-0.0568212	-0.0451845	-0.043106	-0.386856	-0.345615	-0.00518803	-0.348938	-0.307697	Glutathione metabolism	ko00480	O95881	Thioredoxin domain-containing protein 12 OS=Homo sapiens GN=TXNDC12 PE=1 SV=1
-0.222293	-0.0706951	0.11191	-0.0612235	0.0675986	0.249301	-0.000864133	0.127958	0.30966	-0.285497	-0.613417	-0.236549	-0.0276846	-0.193857	-0.141213	0.350803	0.184631	0.237275	-0.192813	-0.23072	-0.135663	0.261804	0.053287	0.365229	0.448203	0.239686	0.551628			O95900	Probable tRNA pseudouridine synthase 2 OS=Homo sapiens GN=TRUB2 PE=1 SV=1
0.165097	-0.123476	-0.188259	0.177849	-0.17826	-0.156746	0.226728	-0.129381	-0.107867	0.21249	0.122299	0.0449226	0.23009	0.188167	0.0877712	0.103519	0.0615965	-0.0387993	-0.096704	0.157851	0.0410874	0.0240574	0.239378	0.229862	-0.0100207	0.2053	0.195784			O95905	Protein ecdysoneless homolog OS=Homo sapiens GN=ECD PE=1 SV=1
0.0103867	-0.0472763	0.186857	0.097693	0.263487	0.321088	0.0477039	0.213498	0.271099	-0.0164365	-0.189092	0.0309652	-0.181437	-0.253203	0.067927	-0.123249	-0.195015	0.126115	-0.0469282	0.00449956	-0.505479	0.136199	-0.434091	-0.278236	0.318835	-0.251455	-0.0956001	Spliceosome	ko03040	O95926	Pre-mRNA-splicing factor SYF2 OS=Homo sapiens GN=SYF2 PE=1 SV=1
-0.370514	-0.145395	-0.203535	-0.316544	-0.166769	-0.241149	-0.0767293	0.0730457	-0.00133433	-0.258121	-0.158497	-0.183334	-0.0596229	-0.130838	-0.196288	0.140361	0.069146	0.003696	-0.166417	-0.248233	-0.0983326	-0.211003	-0.124997	-0.111502	-0.0400088	0.0459972	0.0594922			O95983	Methyl-CpG-binding domain protein 3 OS=Homo sapiens GN=MBD3 PE=1 SV=1
-0.0584393	0.0628835	0.0956012	-0.371811	-0.351967	-0.246209	-0.405159	-0.385315	-0.279557	-0.00874312	0.0685268	0.0949961	-0.16701	0.0537453	-0.0813619	-0.218603	0.00215204	-0.132955	-0.126451	-0.180009	-0.261275	-0.335856	-0.303837	-0.18634	-0.146611	-0.114592	0.002905	Homologous recombination	ko03440	O95985	DNA topoisomerase 3-beta-1 OS=Homo sapiens GN=TOP3B PE=1 SV=1
-0.0492456	-0.00737119	-0.231927	-0.0336133	-0.141815	-0.2479	0.062568	-0.0456337	-0.151719	-0.0685551	-0.170601	-0.0212937	0.192136	0.275856	0.356839	0.278953	0.362673	0.443656	0.0859508	0.108519	-0.0562994	0.314383	0.442307	0.169106	0.268326	0.39625	0.123049			O95989	Diphosphoinositol polyphosphate phosphohydrolase 1 OS=Homo sapiens GN=NUDT3 PE=1 SV=1
0.3921	0.602542	0.532467	0.287632	0.459318	0.22465	-0.221404	-0.0497183	-0.284386	0.165306	-0.0159416	0.433283	-0.295811	-0.631659	-0.219206	-0.490027	-0.825875	-0.413422	0.350978	0.214696	0.422689	-0.629502	-0.610851	-0.342327	-0.958956	-0.940305	-0.671781			O95994	Anterior gradient protein 2 homolog OS=Homo sapiens GN=AGR2 PE=1 SV=1
-0.0114067	-0.224398	0.0551102	0.113081	0.0503014	0.154898	0.173312	0.110533	0.21513	0.301342	0.153931	0.119279	0.241477	0.0776425	0.125533	0.0499597	-0.113875	-0.0659843	-0.0949128	-0.0784642	-0.0122153	0.0664967	-0.107047	-0.0356479	0.128361	-0.0451829	0.0262162	B cell receptor signaling pathway;ko05152;T cell receptor signaling pathway	ko04660;ko04662;ko05152	O95999	B-cell lymphoma/leukemia 10 OS=Homo sapiens GN=BCL10 PE=1 SV=1
-0.264291	-0.18515	-0.304053	-0.117967	0.0240394	-0.149316	0.133198	0.275204	0.101849	-0.134219	-0.148596	-0.149425	-0.370275	-0.444327	-0.509374	-0.226195	-0.300247	-0.365294	-0.0159318	-0.109518	-0.11353	0.073383	-0.0926959	-0.170301	0.153043	-0.013036	-0.0906411	Alzheimer's disease;Huntington's disease;Oxidative phosphorylation;Parkinson's disease	ko00190;ko05010;ko05012;ko05016	O96000	NADH dehydrogenase [ubiquinone] 1 beta subcomplex subunit 10 OS=Homo sapiens GN=NDUFB10 PE=1 SV=3
-0.313202	-0.486365	-0.304501	-0.30947	-0.264069	-0.0849689	0.0585527	0.103954	0.283054	0.101152	-0.0372879	-0.490058	-0.0205229	0.0855869	-0.321017	0.121542	0.227652	-0.178952	-0.194821	-0.151042	-0.427212	-0.508874	-0.368653	-0.598252	-0.251182	-0.110961	-0.34056			O96006	Zinc finger BED domain-containing protein 1 OS=Homo sapiens GN=ZBED1 PE=1 SV=1
0.431199	0.727663	0.326384	0.487007	0.592948	0.483131	-0.008075	0.097866	-0.011951	0.522662	0.297175	0.46554	0.499714	0.265815	0.265447	0.071255	-0.162644	-0.163012	0.0925559	0.193466	0.115318	0.0616492	0.277235	0.177208	-0.0721308	0.143455	0.043428	Folate biosynthesis;Sulfur relay system	ko00790;ko04122	O96007	Molybdopterin synthase catalytic subunit OS=Homo sapiens GN=MOCS2 PE=1 SV=1
-0.143613	-0.117132	-0.228206	0.194434	0.231171	0.285654	0.357418	0.394155	0.448638	-0.133666	0.0519352	-0.0559249	0.0884455	0.271806	0.0181867	0.134331	0.317691	0.0640719	0.038516	0.00129719	-0.0335668	0.453058	0.268819	0.228978	0.450976	0.266737	0.226896	Amyotrophic lateral sclerosis (ALS)	ko05014	O96008	Mitochondrial import receptor subunit TOM40 homolog OS=Homo sapiens GN=TOMM40 PE=1 SV=1
0.194074	0.0762293	-0.176204	0.315696	0.25993	-0.0634302	0.28433	0.228564	-0.0947966	-0.134331	0.0706535	-0.0430488	-0.234101	0.00389377	0.0776805	-0.198526	0.0394692	0.113256	-0.0124357	-0.284524	-0.0062715	0.21556	-0.0420785	0.24846	0.316637	0.0589986	0.349537	Peroxisome	ko04146	O96011	Peroxisomal membrane protein 11B OS=Homo sapiens GN=PEX11B PE=1 SV=1
-0.00500781	0.14215	-0.0046733	-0.16018	-0.0217632	-0.110982	-0.204336	-0.0659195	-0.155138	-0.110224	0.0965407	0.18951	-0.210504	0.0164118	0.0398403	-0.269113	-0.0421971	-0.0187686	0.0246912	0.192393	0.0774613	-0.300174	-0.204835	-0.239342	-0.398356	-0.303017	-0.337524	Axon guidance;ErbB signaling pathway;Focal adhesion;Regulation of actin cytoskeleton;Renal cell carcinoma;T cell receptor signaling pathway	ko04012;ko04360;ko04510;ko04660;ko04810;ko05211	O96013	Serine/threonine-protein kinase PAK 4 OS=Homo sapiens GN=PAK4 PE=1 SV=1
0.167328	0.185632	-0.257611	-0.449354	-0.210439	-0.671273	-0.481137	-0.242222	-0.703056	-0.168325	0.238611	0.156964	0.0657212	0.507638	0.306543	-0.0100288	0.431888	0.230793	0.171472	0.0413516	0.332117	0.779579	0.539722	0.747935	0.597932	0.358075	0.566288	Huntington's disease	ko05016	O96015	Dynein light chain 4, axonemal OS=Homo sapiens GN=DNAL4 PE=1 SV=1
-0.177276	-0.148756	-0.0140834	-0.254589	-0.241235	-0.151551	-0.141217	-0.127863	-0.0381792	-0.275564	-0.207515	-0.502588	-0.416795	-0.286162	-0.422417	-0.0882393	0.0423937	-0.0938613	-0.140051	0.0341429	-0.332607	-0.280292	-0.359848	-0.460068	-0.13412	-0.213676	-0.313896	Cell cycle;Cell cycle - yeast;p53 signaling pathway	ko04110;ko04111;ko04115	O96017	Serine/threonine-protein kinase Chk2 OS=Homo sapiens GN=CHEK2 PE=1 SV=1
-0.136357	-0.0544375	-0.14023	-0.232282	-0.0982039	-0.227464	-0.12194	0.0121376	-0.117123	-0.403298	-0.17655	-0.153492	-0.461325	-0.366332	-0.215815	-0.216878	-0.121885	0.0286317	-0.0414461	-0.0800564	0.0739841	-0.161615	-0.14913	0.0314861	-0.145776	-0.133291	0.0473256			O96019	Actin-like protein 6A OS=Homo sapiens GN=ACTL6A PE=1 SV=1
-0.217901	-0.323551	-0.329449	-0.414531	-0.416621	-0.519494	-0.124231	-0.126321	-0.229194	-0.209462	-0.28272	-0.276255	-0.35108	-0.497392	-0.472734	-0.0949343	-0.241246	-0.216588	-0.00693843	-0.0112876	-0.0988172	-0.185206	-0.165273	-0.242749	-0.146192	-0.126259	-0.203735	Lysine degradation	ko00310	O96028	Histone-lysine N-methyltransferase NSD2 OS=Homo sapiens GN=NSD2 PE=1 SV=1
-0.315035	-0.287177	-0.181842	-0.229887	-0.211358	-0.0223083	0.0314643	0.0499933	0.239043	-0.385455	-0.197841	-0.29704	-0.45523	-0.477661	-0.648219	-0.161785	-0.184216	-0.354774	-0.143034	-0.0654243	-0.0910136	-0.338372	-0.119937	-0.346003	-0.238548	-0.020113	-0.246179			P00167	Cytochrome b5 OS=Homo sapiens GN=CYB5A PE=1 SV=2
0.117531	0.203584	0.0220181	-0.342271	-0.224199	-0.36086	-0.456649	-0.338577	-0.475238	-0.0465524	0.0268912	-0.0253088	-0.468499	-0.337956	-0.428754	-0.453509	-0.322966	-0.413764	0.263533	0.215541	0.276938	-0.421827	-0.436457	-0.343128	-0.673831	-0.688461	-0.595132	Cysteine and methionine metabolism;Glycolysis / Gluconeogenesis;Propanoate metabolism;Pyruvate metabolism	ko00010;ko00270;ko00620;ko00640	P00338	L-lactate dehydrogenase A chain OS=Homo sapiens GN=LDHA PE=1 SV=2
0.0530639	0.0472463	0.0514608	0.113369	0.14817	0.142312	0.0627787	0.0975797	0.0917217	0.15321	0.0207265	0.0908376	0.277535	0.133177	0.181161	0.189277	0.044919	0.092903	-0.0329714	-0.0976514	-0.0400106	0.188442	0.210577	0.268924	0.24532	0.267455	0.325802	Alanine, aspartate and glutamate metabolism;Arginine and proline metabolism;D-Glutamine and D-glutamate metabolism;Nitrogen metabolism;Proximal tubule bicarbonate reclamation	ko00250;ko00330;ko00471;ko00910;ko04964	P00367	Glutamate dehydrogenase 1, mitochondrial OS=Homo sapiens GN=GLUD1 PE=1 SV=2
-0.297892	-0.229922	-0.177964	-0.339832	-0.382259	-0.340677	-0.104573	-0.147	-0.105418	-0.0464947	-0.0996277	-0.0765256	-0.4463	-0.562123	-0.667063	-0.372084	-0.487907	-0.592847	-0.0422685	-0.159095	-0.078747	-0.2987	-0.537292	-0.552068	-0.20533	-0.443922	-0.458698	Folate biosynthesis;One carbon pool by folate	ko00670;ko00790	P00374	Dihydrofolate reductase OS=Homo sapiens GN=DHFR PE=1 SV=2
-0.261109	-0.0703623	-0.244353	0.0282579	0.143356	0.0193017	0.220199	0.335297	0.211243	-0.0144477	-0.200331	-0.0944439	0.0987725	-0.0936666	0.0993826	0.201847	0.0094076	0.202457	-0.157849	-0.0654802	-0.123777	-0.0362994	0.0400895	-0.0147878	0.0794027	0.155792	0.100914	Amino sugar and nucleotide sugar metabolism	ko00520	P00387	NADH-cytochrome b5 reductase 3 OS=Homo sapiens GN=CYB5R3 PE=1 SV=3
0.0984722	0.153882	0.0734377	0.255269	0.205512	0.0568054	0.146672	0.0969147	-0.0517919	0.0491919	0.121197	0.053502	0.0567157	0.154607	0.0580744	-0.0179146	0.0799767	-0.0165559	-0.0836811	-0.0656819	0.0383911	0.197855	0.0737078	0.132901	0.234846	0.110698	0.169892	Glutathione metabolism	ko00480	P00390	Glutathione reductase, mitochondrial OS=Homo sapiens GN=GSR PE=1 SV=2
-0.164483	0.0942327	-0.19064	0.15393	0.217142	0.116015	0.240893	0.304105	0.202978	-0.0967617	0.285997	-0.0969039	-0.316445	-0.0189337	-0.511348	-0.347222	-0.0497108	-0.542125	-0.0908002	-0.233202	-0.294444	-0.0165249	0.129696	-0.0526125	0.189624	0.335845	0.153536	Alzheimer's disease;Cardiac muscle contraction;Huntington's disease;Oxidative phosphorylation;Parkinson's disease	ko00190;ko04260;ko05010;ko05012;ko05016	P00403	Cytochrome c oxidase subunit 2 OS=Homo sapiens GN=MT-CO2 PE=1 SV=1
0.231221	0.36152	0.580665	0.208539	0.34828	0.438737	-0.182596	-0.0428553	0.0476017	0.164727	0.210696	0.528315	0.251095	0.276987	0.233038	-0.050151	-0.024259	-0.068208	0.182943	0.0894997	0.27553	0.0998201	0.220291	0.32318	-0.0828375	0.0376334	0.140522	Amyotrophic lateral sclerosis (ALS);Huntington's disease;Peroxisome;Prion diseases	ko04146;ko05014;ko05016;ko05020	P00441	Superoxide dismutase [Cu-Zn] OS=Homo sapiens GN=SOD1 PE=1 SV=2
-0.107549	-0.14726	-0.164558	-0.285317	-0.324973	-0.343581	-0.145528	-0.185184	-0.203792	-0.384468	-0.0809336	-0.194363	-0.448467	-0.190401	-0.375971	-0.228545	0.0295205	-0.156049	-0.0882737	-0.140556	-0.166427	-0.2785	-0.291247	-0.328198	-0.146748	-0.159495	-0.196446	Nicotinate and nicotinamide metabolism;Purine metabolism;Pyrimidine metabolism	ko00230;ko00240;ko00760	P00491	Purine nucleoside phosphorylase OS=Homo sapiens GN=PNP PE=1 SV=2
-0.21515	-0.27384	-0.323503	-0.369836	-0.355016	-0.375521	-0.099005	-0.084185	-0.10469	-0.339947	-0.407596	-0.501608	-0.331448	-0.363	-0.474764	0.0849357	0.0533837	-0.0583803	-0.144451	-0.0345188	-0.00392873	-0.32534	-0.173167	-0.100644	-0.264374	-0.112201	-0.0396778	Drug metabolism - other enzymes;Purine metabolism	ko00230;ko00983	P00492	Hypoxanthine-guanine phosphoribosyltransferase OS=Homo sapiens GN=HPRT1 PE=1 SV=2
0.170008	0.165466	0.145431	0.212914	0.265589	0.158304	0.0526123	0.105287	-0.00199767	0.0894806	0.132379	0.168824	0.138819	0.152047	0.195056	0.00859113	0.0218191	0.0648281	0.0230738	0.0382405	-0.00253298	0.183323	0.207625	0.2154	0.163729	0.188031	0.195806	Alanine, aspartate and glutamate metabolism;Arginine and proline metabolism;Cysteine and methionine metabolism;Fat digestion and absorption;Phenylalanine metabolism;Phenylalanine, tyrosine and tryptophan biosynthesis;Tyrosine metabolism	ko00250;ko00270;ko00330;ko00350;ko00360;ko00400;ko04975	P00505	Aspartate aminotransferase, mitochondrial OS=Homo sapiens GN=GOT2 PE=1 SV=3
0.281463	0.289339	0.308504	0.405777	0.462147	0.147843	0.112675	0.169045	-0.145259	0.0801241	0.1924	0.106033	0.126373	0.0133219	0.138113	0.0001873	-0.112864	0.0119273	-0.0102495	0.214699	0.0134721	0.0275379	0.20942	0.0597911	-0.0451026	0.136779	-0.0128494	Axon guidance;Cell cycle;Chronic myeloid leukemia;ErbB signaling pathway;Neurotrophin signaling pathway;Pathogenic Escherichia coli infection;Pathways in cancer;Shigellosis;Viral myocarditis	ko04012;ko04110;ko04360;ko04722;ko05130;ko05131;ko05200;ko05220;ko05416	P00519	Tyrosine-protein kinase ABL1 OS=Homo sapiens GN=ABL1 PE=1 SV=4
-0.163431	-0.202482	-0.201507	0.085959	0.0232779	0.108541	0.275099	0.212418	0.297681	0.0207715	-0.0649743	-0.132731	0.308485	0.33782	0.30163	0.367463	0.396798	0.360608	0.204202	0.201385	0.347113	0.645907	0.642807	0.716468	0.395007	0.391907	0.465568	Adherens junction;Bladder cancer;Calcium signaling pathway;Cytokine-cytokine receptor interaction;Dorso-ventral axis formation;Endocytosis;Endometrial cancer;Epithelial cell signaling in Helicobacter pylori infection;ErbB signaling pathway;Focal adhesion;Gap junction;Glioma;GnRH signaling pathway;Hepatitis C;MAPK signaling pathway;MAPK signaling pathway - fly;Melanoma;Non-small cell lung cancer;P…	ko04010;ko04012;ko04013;ko04020;ko04060;ko04144;ko04320;ko04510;ko04520;ko04540;ko04810;ko04912;ko05120;ko05160;ko05200;ko05212;ko05213;ko05214;ko05215;ko05218;ko05219;ko05223	P00533	Epidermal growth factor receptor OS=Homo sapiens GN=EGFR PE=1 SV=2
0.0129293	-0.00215786	0.0597311	0.0413838	0.0156318	0.0691923	0.017883	-0.00786905	0.0456915	0.179339	0.106699	0.0954796	0.00301067	-0.0311721	-0.0119299	-0.124162	-0.158345	-0.139102	0.340052	0.382614	0.317304	0.0193192	0.140137	0.0823331	-0.327337	-0.20652	-0.264324	Carbon fixation in photosynthetic organisms;Glycolysis / Gluconeogenesis	ko00010;ko00710	P00558	Phosphoglycerate kinase 1 OS=Homo sapiens GN=PGK1 PE=1 SV=3
0.17888	0.123556	0.275587	0.0349433	0.0716763	0.0845911	-0.157731	-0.120998	-0.108083	0.0705529	-0.00528748	0.21776	0.134324	0.0729071	0.269063	0.0399822	-0.0214347	0.174721	-0.130729	-0.0869037	-0.0936221	0.0160555	0.051329	0.0573123	0.119807	0.155081	0.161064	Purine metabolism	ko00230	P00568	Adenylate kinase isoenzyme 1 OS=Homo sapiens GN=AK1 PE=1 SV=3
0.244213	0.0499726	0.0606637	-0.230788	-0.227939	-0.336621	-0.349071	-0.346222	-0.454904	0.257145	0.245596	0.24666	-0.527856	-0.588752	-0.555006	-0.777656	-0.838552	-0.804806	0.0477091	-0.0608831	0.075992	-0.319941	-0.425117	-0.737045	-0.34088	-0.446056	-0.757984	Primary immunodeficiency;Purine metabolism	ko00230;ko05340	P00813	Adenosine deaminase OS=Homo sapiens GN=ADA PE=1 SV=3
0.137278	0.0505256	-0.0228689	0.17254	0.0540726	0.113521	0.117562	-0.000905633	0.0585428	0.116871	0.0303854	0.103338	0.0737654	0.0493751	0.192684	-0.00976607	-0.0341564	0.109153	0.0838733	0.174048	0.0791929	0.138952	0.282772	0.239178	0.0265806	0.170401	0.126807	Alanine, aspartate and glutamate metabolism;Arginine and proline metabolism	ko00250;ko00330	P00966	Argininosuccinate synthase OS=Homo sapiens GN=ASS1 PE=1 SV=2
0.709209	0.337246	0.454018	1.48275	1.3564	1.37615	0.982592	0.856242	0.875992	0.976605	0.556905	0.59999	0.996825	0.208247	0.63754	0.285658	-0.50292	-0.0736267	0.796888	0.722328	0.870441	0.93773	0.929194	0.880969	0.141178	0.132642	0.0844167	Complement and coagulation cascades	ko04610	P01023	Alpha-2-macroglobulin OS=Homo sapiens GN=A2M PE=1 SV=3
0.446684	0.492326	0.435239	1.23251	1.38051	1.51647	0.774427	0.922427	1.05839	0.887156	0.938732	0.825466	0.871391	0.774348	0.673796	-0.0123937	-0.109437	-0.209989	0.877825	0.624573	0.852608	0.807482	0.65337	0.78355	0.02248	-0.131632	-0.001452	Chagas disease (American trypanosomiasis);Complement and coagulation cascades;ko05152;Leishmaniasis;Phagosome;Staphylococcus aureus infection;Systemic lupus erythematosus	ko04145;ko04610;ko05140;ko05142;ko05150;ko05152;ko05322	P01024	Complement C3 OS=Homo sapiens GN=C3 PE=1 SV=2
0.066056	0.070797	-0.0955287	0.169185	0.284025	0.303003	0.15541	0.27025	0.289228	0.60143	0.690468	0.484412	0.905249	0.732191	0.48434	0.313146	0.140088	-0.107763	-0.0975238	-0.303468	0.365502	0.116318	0.130165	0.666181	0.128148	0.141995	0.678011	Salivary secretion	ko04970	P01034	Cystatin-C OS=Homo sapiens GN=CST3 PE=1 SV=1
-0.503379	-0.600548	-0.50436	-0.602374	-0.6738	-0.60005	-0.0662783	-0.137704	-0.0639543	-0.739078	-0.589264	-0.519307	-0.42052	-0.538707	-0.505266	0.195363	0.077176	0.110617	-0.46177	-0.490373	-0.447303	-0.534689	-0.409617	-0.643872	-0.068207	0.056865	-0.17739			P01040	Cystatin-A OS=Homo sapiens GN=CSTA PE=1 SV=1
-0.251816	-0.118296	0.0132718	-0.286963	-0.396652	-0.278055	-0.168016	-0.277705	-0.159108	0.237917	-0.0534534	-0.0276507	-0.067745	-0.269941	-0.0167183	-0.120016	-0.322212	-0.0689893	0.0229931	0.176481	-0.0888521	0.00217498	0.27798	-0.0219844	-0.034699	0.241106	-0.0588584	Acute myeloid leukemia;Axon guidance;B cell receptor signaling pathway;Bladder cancer;Chemokine signaling pathway;Chronic myeloid leukemia;Endometrial cancer;ErbB signaling pathway;Fc epsilon RI signaling pathway;Gap junction;Glioma;GnRH signaling pathway;Hepatitis C;Insulin signaling pathway;Long-term depression;Long-term potentiation;MAPK signaling pathway;Melanogenesis;Melanoma;Natural killer …	ko04010;ko04012;ko04062;ko04360;ko04370;ko04530;ko04540;ko04650;ko04660;ko04662;ko04664;ko04720;ko04722;ko04730;ko04810;ko04910;ko04912;ko04916;ko05160;ko05200;ko05211;ko05213;ko05214;ko05215;ko05216;ko05218;ko05219;ko05220;ko05221;ko05223	P01111	GTPase NRas OS=Homo sapiens GN=NRAS PE=1 SV=1
0.184955	0.248248	0.340741	-0.329204	-0.174088	-0.316405	-0.587185	-0.432069	-0.574386	-0.279125	0.0329092	-0.0366612	-0.403483	0.332706	0.0526934	-0.309191	0.426998	0.146986	-0.212673	0.160504	0.195844	-0.291541	0.15852	0.593715	-0.339433	0.110628	0.545823	Acute myeloid leukemia;Aldosterone-regulated sodium reabsorption;Axon guidance;B cell receptor signaling pathway;Bladder cancer;Chemokine signaling pathway;Chronic myeloid leukemia;Colorectal cancer;Dorso-ventral axis formation;Endometrial cancer;ErbB signaling pathway;Fc epsilon RI signaling pathway;Gap junction;Glioma;GnRH signaling pathway;Hepatitis C;Insulin signaling pathway;Long-term depres…	ko04010;ko04012;ko04013;ko04062;ko04320;ko04360;ko04370;ko04530;ko04540;ko04650;ko04660;ko04662;ko04664;ko04720;ko04722;ko04730;ko04810;ko04910;ko04912;ko04914;ko04916;ko04960;ko05160;ko05200;ko05210;ko05211;ko05212;ko05213;ko05214;ko05215;ko05216;ko05218;ko05219;ko05220;ko05221;ko05223	P01116	GTPase KRas OS=Homo sapiens GN=KRAS PE=1 SV=1
-0.0157855	-0.179521	-0.0774032	0.275473	0.0888893	0.145266	0.366376	0.179793	0.236169	0.377765	0.302067	0.266321	0.256246	0.280502	0.30356	-0.0591383	-0.0348823	-0.0118243	-0.0814055	-0.126759	-0.0539996	0.249313	0.13627	0.039033	0.336701	0.223658	0.126421	Bile secretion;Endocytosis;Hepatitis C;Toxoplasmosis	ko04144;ko04976;ko05145;ko05160	P01130	Low-density lipoprotein receptor OS=Homo sapiens GN=LDLR PE=1 SV=1
0.237458	0.106237	0.104408	0.180063	0.350016	0.28578	0.0306953	0.200648	0.136412	0.353648	0.310569	0.395842	0.270956	0.167294	0.404985	-0.082397	-0.186059	0.051632	0.0550441	0.207378	0.0883608	0.0811384	0.102527	0.240994	-0.0357892	-0.0144006	0.124066			P02144	Myoglobin OS=Homo sapiens GN=MB PE=1 SV=2
0.589177	0.581157	0.767322	0.145618	0.390825	0.499681	-0.500267	-0.25506	-0.146204	0.0927269	-0.522783	-0.469692	0.501219	0.0936727	0.125352	0.801135	0.393589	0.425268	0.620764	0.380521	0.486336	0.867273	0.710453	0.727705	0.371399	0.214579	0.231831			P02533	Keratin, type I cytoskeletal 14 OS=Homo sapiens GN=KRT14 PE=1 SV=4
0.0477359	0.159371	0.0740699	0.0318917	0.141548	0.0542731	-0.0618339	0.0478224	-0.0394525	-0.0512857	0.0213289	0.0301106	0.028868	0.0594586	0.123847	0.0288167	0.0594073	0.123796	0.0251874	0.0629068	-0.00921402	-0.0513635	-0.0141854	-0.0168674	-0.0776569	-0.0404788	-0.0431608	Arrhythmogenic right ventricular cardiomyopathy (ARVC);Dilated cardiomyopathy;Hypertrophic cardiomyopathy (HCM)	ko05410;ko05412;ko05414	P02545	Prelamin-A/C OS=Homo sapiens GN=LMNA PE=1 SV=1
-0.168187	-0.503199	0.139559	-0.404434	-0.717268	-0.577315	-0.227158	-0.539992	-0.400039	-0.347364	0.292627	0.192265	-1.07773	-0.41593	-0.590316	-1.12357	-0.461773	-0.636159	-0.0710326	0.264633	0.127443	-0.741402	-0.580905	-0.932321	-0.848416	-0.687919	-1.03934			P02686	Myelin basic protein OS=Homo sapiens GN=MBP PE=1 SV=3
0.362067	0.547184	0.26578	0.0966809	0.0687809	-0.109783	-0.294996	-0.322896	-0.50146	0.152113	0.173762	0.109663	-0.339939	-0.417457	-0.531501	-0.485118	-0.562636	-0.67668	0.100576	0.12993	0.258343	-0.690196	-0.677277	-0.695302	-0.853146	-0.840227	-0.858252	Amoebiasis;Bacterial invasion of epithelial cells;ECM-receptor interaction;Focal adhesion;Pathways in cancer;Regulation of actin cytoskeleton;Small cell lung cancer	ko04510;ko04512;ko04810;ko05100;ko05146;ko05200;ko05222	P02751	Fibronectin OS=Homo sapiens GN=FN1 PE=1 SV=4
0.346538	0.412897	0.324814	1.28579	1.2095	0.925647	0.924374	0.848084	0.564231	1.13436	1.42184	1.48727	0.936823	1.34868	1.1476	-0.411	0.000856667	-0.200223	1.08779	0.740453	0.952089	1.20654	1.18395	1.48181	0.279763	0.257173	0.555033			P02765	Alpha-2-HS-glycoprotein OS=Homo sapiens OX=9606 GN=AHSG PE=1 SV=2
0.346538	0.412897	0.324814	1.28579	1.2095	0.925647	0.924374	0.848084	0.564231	1.13436	1.42184	1.48727	0.936823	1.34868	1.1476	-0.411	0.000856667	-0.200223	1.08779	0.740453	0.952089	1.20654	1.18395	1.48181	0.279763	0.257173	0.555033			P02765	Alpha-2-HS-glycoprotein OS=Homo sapiens GN=AHSG PE=1 SV=1
0.488958	-0.0375483	0.397745	0.87458	0.443338	0.843672	0.591528	0.160286	0.56062	0.995608	1.05803	1.00757	0.244494	0.22406	0.242456	-0.775909	-0.796343	-0.777947	0.660604	0.855433	0.691332	1.0413	0.768215	0.711546	0.30551	0.0324253	-0.0242437			P02768	Serum albumin OS=Homo sapiens GN=ALB PE=1 SV=2
-0.507378	-0.469756	-0.421362	-0.352455	-0.348242	-0.301912	0.11371	0.117923	0.164253	-0.247208	-0.364142	-0.348074	-0.0604268	-0.164955	-0.0446234	0.259381	0.154853	0.275185	-0.309765	-0.274111	-0.277184	-0.0741843	-0.0465416	-0.051627	0.212836	0.240478	0.235393	Endocytosis;Hematopoietic cell lineage;Phagosome	ko04144;ko04145;ko04640	P02786	Transferrin receptor protein 1 OS=Homo sapiens GN=TFRC PE=1 SV=2
0.51859	0.507477	0.252354	1.52831	1.01351	0.182509	1.10217	0.58737	-0.243631	0.533158	1.61795	0.697512	0.626118	1.49349	0.805993	-0.323422	0.54395	-0.143547	0.436486	-0.260082	0.995963	0.820726	0.0580795	1.45888	0.429937	-0.332709	1.06809	Mineral absorption	ko04978	P02787	Serotransferrin OS=Homo sapiens GN=TF PE=1 SV=3
-0.0292976	0.160779	0.204526	0.0955834	0.269456	0.287076	-0.0164191	0.157454	0.175074	0.158441	0.222377	0.172823	0.173669	0.0346334	0.281918	-0.010878	-0.149914	0.097371	0.098515	0.177646	0.149518	0.0309165	0.1349	0.0833263	-0.110977	-0.006993	-0.0585667	Mineral absorption;Porphyrin and chlorophyll metabolism	ko00860;ko04978	P02794	Ferritin heavy chain OS=Homo sapiens GN=FTH1 PE=1 SV=2
0.486899	0.582781	0.616013	0.271561	0.123029	0.21449	-0.290337	-0.438869	-0.347408	0.120676	0.249514	-0.0400121	0.169893	0.518564	0.555835	0.0598337	0.408505	0.445776	-0.0115755	0.211226	0.0788254	0.0939262	0.0618151	-0.00807328	0.0011009	-0.0310102	-0.100899	Mineral absorption	ko04978	P02795	Metallothionein-2 OS=Homo sapiens GN=MT2A PE=1 SV=1
-0.128647	-0.151804	0.0299218	0.334775	0.555922	0.507792	0.418285	0.639432	0.591302	0.178357	0.158972	0.216775	0.248157	0.308381	0.330627	0.0634557	0.12368	0.145926	0.00389644	-0.50026	-0.0240063	0.650606	0.504548	0.676011	0.824063	0.678005	0.849468	Bile secretion;Terpenoid backbone biosynthesis	ko00900;ko04976	P04035	3-hydroxy-3-methylglutaryl-coenzyme A reductase OS=Homo sapiens GN=HMGCR PE=1 SV=1
-0.0362747	-0.0433725	0.0280884	-0.144229	-0.230921	-0.146423	-0.127043	-0.213735	-0.129237	0.0145448	0.112155	0.0678239	-0.17892	-0.192983	-0.192632	-0.243761	-0.257824	-0.257473	-0.137691	-0.142241	-0.0983241	-0.286275	-0.263779	-0.35269	-0.16019	-0.137694	-0.226605	Amyotrophic lateral sclerosis (ALS);Methane metabolism;Peroxisome;Tryptophan metabolism	ko00380;ko00680;ko04146;ko05014	P04040	Catalase OS=Homo sapiens GN=CAT PE=1 SV=3
0.0184941	0.00445651	0.135995	-0.101973	-0.228433	-0.0279082	-0.154955	-0.281415	-0.0808901	0.0789734	-0.0914595	-0.0429096	0.119694	-0.185318	0.00986313	0.138159	-0.166853	0.0283284	0.166177	0.219864	0.280361	0.294041	0.223747	0.436241	0.071907	0.001613	0.214107	Acute myeloid leukemia;B cell receptor signaling pathway;Bladder cancer;Chemokine signaling pathway;Chronic myeloid leukemia;Colorectal cancer;Endometrial cancer;ErbB signaling pathway;Fc epsilon RI signaling pathway;Fc gamma R-mediated phagocytosis;Focal adhesion;Gap junction;Glioma;GnRH signaling pathway;Hepatitis C;Insulin signaling pathway;ko05152;Long-term depression;Long-term potentiation;M…	ko04010;ko04012;ko04062;ko04270;ko04370;ko04510;ko04540;ko04650;ko04660;ko04662;ko04664;ko04666;ko04720;ko04722;ko04730;ko04810;ko04910;ko04912;ko04914;ko04916;ko05152;ko05160;ko05200;ko05210;ko05211;ko05212;ko05213;ko05214;ko05215;ko05218;ko05219;ko05220;ko05221;ko05223	P04049	RAF proto-oncogene serine/threonine-protein kinase OS=Homo sapiens GN=RAF1 PE=1 SV=1
0.131197	0.152833	0.154719	0.255846	0.188336	0.165263	0.109596	0.0420863	0.0190133	0.0572982	0.201143	0.144351	0.0921261	0.142686	0.0649778	-0.042138	0.00842193	-0.0692863	0.0447558	0.104492	0.103631	0.0675029	0.0968352	0.16082	-0.01679	0.0125423	0.0765271	Lysosome;Other glycan degradation;Sphingolipid metabolism	ko00511;ko00600;ko04142	P04062	Glucosylceramidase OS=Homo sapiens GN=GBA PE=1 SV=3
0.127798	0.11419	0.0146641	-0.0448991	0.0351418	0.111812	-0.13045	-0.0504089	0.0262613	-0.100587	0.0223713	-0.0270893	0.0621488	0.142988	0.119073	0.0972505	0.17809	0.154175	0.142213	0.158295	-0.0235201	0.205914	0.126741	0.0172471	0.113585	0.0344117	-0.0750822	Other glycan degradation	ko00511	P04066	Tissue alpha-L-fucosidase OS=Homo sapiens GN=FUCA1 PE=1 SV=4
-0.058279	-0.0142278	0.0378321	-0.0958652	0.0171365	-0.0486791	-0.084307	0.0286947	-0.0371209	-0.0316677	-0.033624	-0.124565	-0.0762058	0.0304375	-0.0775027	-0.0129202	0.0937231	-0.0142171	0.0527769	0.066049	0.0879767	0.046308	0.126303	0.113591	-0.0226262	0.0573688	0.0446568	Carbon fixation in photosynthetic organisms;Fructose and mannose metabolism;Glycolysis / Gluconeogenesis;Pentose phosphate pathway	ko00010;ko00030;ko00051;ko00710	P04075	Fructose-bisphosphate aldolase A OS=Homo sapiens GN=ALDOA PE=1 SV=2
-0.0287927	0.0810248	0.14054	0.0603496	-0.121535	0.161024	-0.00390777	-0.185792	0.0967666	0.241357	-0.0437518	0.0930684	0.0242687	0.202355	-0.0396495	-0.0726225	0.105464	-0.136541	-0.0510248	-0.0890514	0.0773316	0.112043	0.0995707	0.0872466	0.132958	0.120486	0.108161			P04080	Cystatin-B OS=Homo sapiens GN=CSTB PE=1 SV=2
0.727036	0.516961	0.630449	0.460834	0.238079	0.280704	-0.163981	-0.386736	-0.344111	0.404543	0.41894	0.375763	-0.0532807	0.0456236	0.0256854	-0.453029	-0.354125	-0.374063	0.30137	0.0323003	0.000135651	-0.106436	-0.167518	-0.132079	-0.217705	-0.278787	-0.243348			P04083	Annexin A1 OS=Homo sapiens GN=ANXA1 PE=1 SV=2
0.193077	0.00206746	0.062082	0.512139	0.248678	0.293906	0.426397	0.162936	0.208164	-0.0236775	0.717677	0.810383	0.69806	1.0243	0.796222	0.196599	0.522839	0.294761	0.275465	0.466462	-0.0790524	0.738253	0.0440656	0.508257	0.517295	-0.176893	0.287299	Fat digestion and absorption;Vitamin digestion and absorption	ko04975;ko04977	P04114	Apolipoprotein B-100 OS=Homo sapiens GN=APOB PE=1 SV=2
-0.179723	-0.292558	-0.245013	-0.21	-0.0365097	0.0766881	0.029098	0.202588	0.315786	0.0222391	-0.202228	-0.245466	-0.236391	-0.252533	-0.0554435	-0.0945727	-0.110715	0.0863748	-0.123452	0.0847883	-0.156132	-0.120762	0.118324	-0.144181	-0.0558301	0.183256	-0.0792491	Prion diseases	ko05020	P04156	Major prion protein OS=Homo sapiens GN=PRNP PE=1 SV=1
-0.345651	-0.350648	-0.355295	0.0604066	0.286665	0.284051	0.410938	0.637196	0.634582	-0.336773	-0.281721	-0.297273	-0.539723	-0.462541	-0.416634	-0.234467	-0.157285	-0.111378	-0.116848	-0.216733	-0.330472	0.0936813	-0.110627	-0.199406	0.315032	0.110724	0.021945	Huntington's disease;Peroxisome	ko04146;ko05016	P04179	Superoxide dismutase [Mn], mitochondrial OS=Homo sapiens OX=9606 GN=SOD2 PE=1 SV=3
-0.345651	-0.350648	-0.355295	0.0604066	0.286665	0.284051	0.410938	0.637196	0.634582	-0.336773	-0.281721	-0.297273	-0.539723	-0.462541	-0.416634	-0.234467	-0.157285	-0.111378	-0.116848	-0.216733	-0.330472	0.0936813	-0.110627	-0.199406	0.315032	0.110724	0.021945	Huntington's disease;Peroxisome	ko04146;ko05016	P04179	Superoxide dismutase [Mn], mitochondrial OS=Homo sapiens GN=SOD2 PE=1 SV=3
-0.42735	-0.315042	-0.338488	-0.0794875	-0.0340382	0.191426	0.280806	0.326255	0.551719	-0.556127	-0.950975	-0.718457	-0.221888	-0.281361	0.0244776	0.519965	0.460492	0.766331	-0.883782	-1.12311	-0.888765	-0.112773	-0.384445	0.0303232	0.852446	0.580774	0.995542	Arginine and proline metabolism	ko00330	P04181	Ornithine aminotransferase, mitochondrial OS=Homo sapiens GN=OAT PE=1 SV=1
0.0999228	0.132472	0.135124	-0.421126	-0.438683	-0.27806	-0.543632	-0.561189	-0.400566	0.230044	0.0287546	0.0454109	-0.667169	-1.03601	-1.02988	-0.768572	-1.13741	-1.13128	0.296357	0.2079	0.167767	-0.56056	-0.578934	-0.616576	-0.784568	-0.802942	-0.840584	Drug metabolism - other enzymes;Pyrimidine metabolism	ko00240;ko00983	P04183	Thymidine kinase, cytosolic OS=Homo sapiens GN=TK1 PE=1 SV=2
0.63625	0.723176	0.700737	0.292127	0.362132	0.319558	-0.394594	-0.324589	-0.367163	0.00714101	-0.0620055	-0.0834142	0.582796	0.548279	0.536713	0.628889	0.594372	0.582806	-0.103566	-0.0581083	-0.115947	1.16126	1.188	1.19601	1.2538	1.28054	1.28855			P04264	Keratin, type II cytoskeletal 1 OS=Homo sapiens GN=KRT1 PE=1 SV=6
0.0517293	0.0166821	-0.0847827	-0.0413221	-0.111864	-0.149155	-0.035865	-0.106407	-0.143698	-0.222095	-0.178949	-0.161487	0.0258186	-0.0439767	-0.211122	0.213329	0.143534	-0.0236117	0.0526557	-0.0556439	0.190127	0.238938	0.280605	0.347434	0.176558	0.218225	0.285054	Gap junction;Pathogenic Escherichia coli infection;Phagosome	ko04145;ko04540;ko05130	P04350	Tubulin beta-4A chain OS=Homo sapiens GN=TUBB4A PE=1 SV=2
0.0468426	0.0144272	-0.0785716	0.151658	0.103856	-0.116094	0.157425	0.109623	-0.110327	0.22689	0.205623	0.22794	0.164541	0.0947142	0.0594331	-0.05561	-0.125437	-0.160718	0.363378	0.113761	0.254494	0.0794025	0.0182128	-0.0485049	-0.164475	-0.225665	-0.292383	Alzheimer's disease;Glycolysis / Gluconeogenesis	ko00010;ko05010	P04406	Glyceraldehyde-3-phosphate dehydrogenase OS=Homo sapiens GN=GAPDH PE=1 SV=3
0.00668046	0.0826819	0.118531	-0.0873238	-0.0242793	-0.0119985	-0.156622	-0.0935771	-0.0812963	0.191708	0.122331	0.174418	0.0545545	0.137274	0.152305	-0.108264	-0.025545	-0.010514	0.0542529	0.0172712	0.193407	0.0381578	0.160961	0.145083	-0.0501526	0.0726506	0.0567726	Alanine, aspartate and glutamate metabolism;Arginine and proline metabolism	ko00250;ko00330	P04424	Argininosuccinate lyase OS=Homo sapiens GN=ASL PE=1 SV=4
-0.153124	-0.216173	-0.064186	-0.17796	-0.0764872	0.0436926	-0.0334657	0.0680071	0.188187	0.0944944	-0.027754	0.0329631	0.0975238	0.0137751	-0.037639	0.0642893	-0.0194594	-0.0708735	-0.0290396	-0.0276542	0.0265866	-0.0146465	0.164013	0.107273	-0.00461077	0.174049	0.117309	Adherens junction;Bladder cancer;Calcium signaling pathway;Endometrial cancer;ErbB signaling pathway;Focal adhesion;Non-small cell lung cancer;Pancreatic cancer;Pathways in cancer;Prostate cancer	ko04012;ko04020;ko04510;ko04520;ko05200;ko05212;ko05213;ko05215;ko05219;ko05223	P04626	Receptor tyrosine-protein kinase erbB-2 OS=Homo sapiens GN=ERBB2 PE=1 SV=1
0.0742959	0.222711	0.252092	0.0753397	0.164172	0.243112	-0.107693	-0.018861	0.060079	0.243447	0.109277	0.123454	0.269319	0.162281	0.371985	0.110593	0.003555	0.213259	0.151106	-0.0345005	0.141644	0.15555	0.0980531	0.0960202	0.0694668	0.0119699	0.00993703			P04632	Calpain small subunit 1 OS=Homo sapiens GN=CAPNS1 PE=1 SV=1
2.0986	2.26195	1.62863	1.98776	1.79269	1.82123	-0.00863333	-0.203703	-0.175163	1.37369	1.34883	1.44072	1.8839	1.99976	2.1042	0.496153	0.612013	0.716453	0.819359	1.06053	0.811818	0.828202	0.845625	0.666396	-0.0690337	-0.0516107	-0.23084	Mineral absorption	ko04978	P04733	Metallothionein-1F OS=Homo sapiens GN=MT1F PE=1 SV=1
-0.0436192	0.0884444	-0.0208815	-0.032718	0.0147711	0.0418085	-0.0406992	0.00678987	0.0338273	0.00603786	-0.069467	0.0533284	-0.201554	-0.246795	-0.171735	-0.198187	-0.243428	-0.168368	-0.0643476	-0.137843	0.0369151	-0.373167	-0.298153	-0.306148	-0.318075	-0.243061	-0.251056	Amoebiasis;MAPK signaling pathway;VEGF signaling pathway	ko04010;ko04370;ko05146	P04792	Heat shock protein beta-1 OS=Homo sapiens GN=HSPB1 PE=1 SV=2
-0.629538	-0.703216	-0.651363	-1.12921	-1.16436	-1.03437	-0.467838	-0.502988	-0.372998	-0.743503	-0.57979	-0.5736	-1.685	-1.5508	-1.73185	-1.0527	-0.918502	-1.09955	-0.717803	-0.595241	-0.422512	-1.51128	-1.13352	-1.09135	-0.932761	-0.555001	-0.512831	One carbon pool by folate;Pyrimidine metabolism	ko00240;ko00670	P04818	Thymidylate synthase OS=Homo sapiens GN=TYMS PE=1 SV=3
-0.085147	-0.0936907	0.0417385	0.100153	0.0676194	0.112366	0.145853	0.113319	0.158066	-0.0423761	-0.0254197	-0.0014645	-0.0298782	-0.0774688	-0.0363843	-0.00679143	-0.054382	-0.0132975	-0.024824	-0.0129604	-0.0966809	0.106444	-0.030329	-0.0107302	0.151266	0.0144928	0.0340916	N-Glycan biosynthesis;Protein processing in endoplasmic reticulum;Various types of N-glycan biosynthesis	ko00510;ko00513;ko04141	P04843	Dolichyl-diphosphooligosaccharide--protein glycosyltransferase subunit 1 OS=Homo sapiens GN=RPN1 PE=1 SV=1
0.0524597	-0.0541041	0.0454619	0.263923	0.107735	0.0378582	0.249317	0.0931292	0.0232524	0.147308	0.0371948	-0.00140795	0.0791201	0.124212	-0.00497907	0.0180885	0.0631804	-0.0660107	-0.0640534	-0.0241992	-0.228457	-0.135826	-0.0758606	-0.221652	-0.0302561	0.0297093	-0.116082	N-Glycan biosynthesis;Protein processing in endoplasmic reticulum;Various types of N-glycan biosynthesis	ko00510;ko00513;ko04141	P04844	Dolichyl-diphosphooligosaccharide--protein glycosyltransferase subunit 2 OS=Homo sapiens GN=RPN2 PE=1 SV=3
0.013911	0.0687587	0.0332241	-0.229827	0.0814547	0.00694291	-0.268458	0.0428234	-0.0316884	-0.128882	-0.114291	-0.124548	-0.0129069	-0.175054	-0.0604736	0.109667	-0.0524803	0.0621001	-0.233049	-0.229207	-0.190853	-0.224604	-0.220748	-0.428678	-0.006901	-0.003045	-0.210975	Axon guidance;Chagas disease (American trypanosomiasis);Chemokine signaling pathway;Gap junction;Gastric acid secretion;Leukocyte transendothelial migration;Long-term depression;Melanogenesis;Progesterone-mediated oocyte maturation;Tight junction;Toxoplasmosis	ko04062;ko04360;ko04530;ko04540;ko04670;ko04730;ko04914;ko04916;ko04971;ko05142;ko05145	P04899	Guanine nucleotide-binding protein G(i) subunit alpha-2 OS=Homo sapiens GN=GNAI2 PE=1 SV=3
0.0215349	0.205929	0.0693102	0.0524422	-0.123713	-0.193068	-0.0464825	-0.222638	-0.291993	0.0978223	0.0615271	0.0476612	-0.0579413	0.0524658	-0.144891	-0.126945	-0.0165377	-0.213895	0.381435	-0.114544	0.113975	-0.349935	-0.453136	-0.178842	-0.47689	-0.580091	-0.305797	Systemic lupus erythematosus	ko05322	P04908	Histone H2A type 1-B/E OS=Homo sapiens GN=HIST1H2AB PE=1 SV=2
-0.0662415	-0.020968	-0.0946718	-0.1257	-0.0854767	-0.111641	-0.0650729	-0.0248496	-0.0510139	0.104605	0.107916	-0.0597981	-0.223416	-0.0591099	-0.293662	-0.274324	-0.110018	-0.34457	-0.284489	-0.041349	-0.103786	-0.170161	-0.0816034	-0.152713	-0.026953	0.0616046	-0.009505	Bile secretion;Gastric acid secretion;Pancreatic secretion;Salivary secretion	ko04970;ko04971;ko04972;ko04976	P04920	Anion exchange protein 2 OS=Homo sapiens GN=SLC4A2 PE=1 SV=4
-0.0417854	0.00991797	-0.0599687	0.133952	0.18825	0.180551	0.164564	0.218862	0.211163	-0.0646247	-0.00820965	-0.0159041	-0.0585615	0.0231722	0.0161886	-0.028982	0.0527517	0.0457681	-0.0258959	-0.0212046	-0.00608686	0.0741221	0.115234	0.0846595	0.0918512	0.132963	0.102389	Aldosterone-regulated sodium reabsorption;Bile secretion;Carbohydrate digestion and absorption;Cardiac muscle contraction;Endocrine and other factor-regulated calcium reabsorption;Gastric acid secretion;Mineral absorption;Pancreatic secretion;Protein digestion and absorption;Proximal tubule bicarbonate reclamation;Salivary secretion	ko04260;ko04960;ko04961;ko04964;ko04970;ko04971;ko04972;ko04973;ko04974;ko04976;ko04978	P05023	Sodium/potassium-transporting ATPase subunit alpha-1 OS=Homo sapiens GN=ATP1A1 PE=1 SV=1
0.0596315	-0.0430902	0.0934526	0.512528	0.472349	0.526137	0.475863	0.435684	0.489472	0.129922	0.188294	0.21596	0.217349	0.306947	0.361275	0.0392903	0.128888	0.183216	0.100122	0.298139	0.33349	0.3335	0.653037	0.614247	0.089583	0.40912	0.37033	Aldosterone-regulated sodium reabsorption;Bile secretion;Carbohydrate digestion and absorption;Cardiac muscle contraction;Endocrine and other factor-regulated calcium reabsorption;Gastric acid secretion;Mineral absorption;Pancreatic secretion;Protein digestion and absorption;Proximal tubule bicarbonate reclamation;Salivary secretion	ko04260;ko04960;ko04961;ko04964;ko04970;ko04971;ko04972;ko04973;ko04974;ko04976;ko04978	P05026	Sodium/potassium-transporting ATPase subunit beta-1 OS=Homo sapiens GN=ATP1B1 PE=1 SV=1
-0.176236	-0.228088	-0.304501	0.105657	0.106045	0.116116	0.341932	0.34232	0.352391	-0.251154	-0.401551	-0.407896	0.0524061	-0.0910051	-0.0455804	0.40594	0.262529	0.307953	-0.412145	-0.377476	-0.407261	0.106393	-0.0119479	0.0169933	0.505354	0.387013	0.415954	Alzheimer's disease	ko05010	P05067	Amyloid beta A4 protein OS=Homo sapiens GN=APP PE=1 SV=3
0.0536772	0.128516	0.115911	0.210675	0.367073	0.325971	0.111307	0.267705	0.226603	-0.0234079	0.150891	0.200496	0.195821	0.296849	0.27847	0.0864946	0.187523	0.169144	-0.0432898	0.0444399	-0.00372204	0.316318	0.420358	0.386823	0.317175	0.421215	0.38768	Arginine and proline metabolism;Ascorbate and aldarate metabolism;beta-Alanine metabolism;Chloroalkane and chloroalkene degradation;Fatty acid metabolism;Glycerolipid metabolism;Glycolysis / Gluconeogenesis;Histidine metabolism;Limonene and pinene degradation;Lysine degradation;Pentose and glucuronate interconversions;Propanoate metabolism;Pyruvate metabolism;Tryptophan metabolism;Valine, leucine…	ko00010;ko00040;ko00053;ko00071;ko00280;ko00310;ko00330;ko00340;ko00380;ko00410;ko00561;ko00620;ko00625;ko00640;ko00903	P05091	Aldehyde dehydrogenase, mitochondrial OS=Homo sapiens GN=ALDH2 PE=1 SV=2
0.122701	0.170611	0.110696	0.0796067	0.156542	-0.0723737	-0.0550626	0.0218727	-0.207043	-0.0325938	-0.0330338	-0.00901308	0.184676	0.00847529	0.148402	0.209556	0.0333555	0.173282	-0.261456	-0.287368	-0.126259	-0.166172	-0.159899	-0.0128711	0.0588557	0.0651287	0.212157			P05114	Non-histone chromosomal protein HMG-14 OS=Homo sapiens GN=HMGN1 PE=1 SV=3
0.0762262	-0.0815669	-0.00129467	0.198546	0.0710717	0.204817	0.200758	0.0732835	0.207029	0.0373065	0.0934701	0.0621459	0.0785529	-0.0584779	-0.101025	0.0142454	-0.122785	-0.165332	-0.0955944	-0.173605	-0.152981	0.21629	0.000505129	-0.043494	0.357017	0.141232	0.0972328	Calcium signaling pathway;Huntington's disease;Parkinson's disease	ko04020;ko05012;ko05016	P05141	ADP/ATP translocase 2 OS=Homo sapiens GN=SLC25A5 PE=1 SV=7
0.112564	-0.0640824	-0.0829556	0.0766546	-0.0181227	0.131445	0.0881459	-0.00663137	0.142936	-0.0790883	-0.0647737	-0.130455	0.0980016	0.0791714	0.0834157	0.189441	0.17061	0.174855	0.00103201	-0.0198766	0.194468	0.216188	0.247819	0.280268	0.157647	0.189278	0.221727	RIG-I-like receptor signaling pathway	ko04622	P05161	Ubiquitin-like protein ISG15 OS=Homo sapiens GN=ISG15 PE=1 SV=5
0.0284806	-0.00994285	0.163376	0.192051	0.195729	0.348249	0.131413	0.135091	0.287611	0.287649	0.21986	0.167101	0.38148	0.287775	0.265511	0.15661	0.062905	0.040641	0.0182938	0.101386	0.0135033	0.560665	0.637119	0.44052	0.516271	0.592725	0.396126	Carbon fixation pathways in prokaryotes;Glyoxylate and dicarboxylate metabolism;Propanoate metabolism;Valine, leucine and isoleucine degradation	ko00280;ko00630;ko00640;ko00720	P05165	Propionyl-CoA carboxylase alpha chain, mitochondrial OS=Homo sapiens GN=PCCA PE=1 SV=4
0.0194582	-0.0387813	-0.140544	0.0286855	-0.0741781	-0.0589662	0.0819745	-0.0208891	-0.00567717	-0.0581057	-0.20931	-0.204868	0.00731725	-0.0335881	-0.0550728	0.164745	0.12384	0.102355	-0.244803	-0.249226	-0.211435	0.0491481	0.0894275	0.150303	0.284303	0.324582	0.385458	Carbon fixation pathways in prokaryotes;Glyoxylate and dicarboxylate metabolism;Propanoate metabolism;Valine, leucine and isoleucine degradation	ko00280;ko00630;ko00640;ko00720	P05166	Propionyl-CoA carboxylase beta chain, mitochondrial OS=Homo sapiens GN=PCCB PE=1 SV=3
-0.0970536	0.108743	0.0773148	-0.00915508	0.062461	-0.0211005	-0.0388231	0.0327929	-0.0507686	-0.0339968	-0.0263384	0.0318786	0.0585177	0.0984282	0.132634	0.0680032	0.107914	0.14212	0.0131986	0.0839211	0.0579096	0.120767	0.19189	0.203517	0.0690906	0.140214	0.151841	Hepatitis C;Measles;Protein processing in endoplasmic reticulum;RNA transport	ko03013;ko04141;ko05160;ko05162	P05198	Eukaryotic translation initiation factor 2 subunit 1 OS=Homo sapiens GN=EIF2S1 PE=1 SV=3
0.321062	0.413465	0.725516	0.617231	0.414166	0.967541	0.13055	-0.072515	0.48086	-0.0545197	0.474755	-0.6176	0.0262282	0.363062	-0.350471	0.0920164	0.42885	-0.284683	0.852126	1.11045	0.417041	0.251566	0.109882	-0.228616	-0.54164	-0.683324	-1.02182			P05204	Non-histone chromosomal protein HMG-17 OS=Homo sapiens GN=HMGN2 PE=1 SV=3
-0.0158562	0.0386526	0.498233	0.224537	0.105577	0.302353	0.0508605	-0.0680995	0.128677	-0.128573	-0.320305	-0.201836	-0.0880865	-0.194292	-0.235778	0.128818	0.0226127	-0.0188733	0.203274	-0.116107	-0.0552017	0.0420479	-0.0894426	-0.284119	0.0313928	-0.100098	-0.294774	Ribosome	ko03010	P05386	60S acidic ribosomal protein P1 OS=Homo sapiens GN=RPLP1 PE=1 SV=1
0.0851923	-0.00267506	-0.0356994	-0.00578401	-0.0255131	-0.177381	-0.02139	-0.041119	-0.192987	-0.153808	-0.0931897	-0.0124697	0.0875071	-0.0306579	0.0268737	0.173996	0.0558312	0.113363	0.13688	0.252324	-0.0635151	0.0500251	0.192496	0.0741917	-0.0585379	0.083933	-0.0343713	Ribosome	ko03010	P05387	60S acidic ribosomal protein P2 OS=Homo sapiens GN=RPLP2 PE=1 SV=1
-0.0482397	-0.0315295	-0.0569662	-0.162796	-0.0786625	-0.305274	-0.117218	-0.033084	-0.259696	0.00412176	-0.222025	-0.10908	0.027724	-0.171929	-0.0811295	0.136718	-0.0629346	0.0278649	0.00911552	-0.104779	-0.116836	-0.164622	-0.113016	-0.0987854	-0.0937888	-0.0421828	-0.0279522	Ribosome	ko03010	P05388	60S acidic ribosomal protein P0 OS=Homo sapiens GN=RPLP0 PE=1 SV=1
0.961271	0.55651	0.800571	0.193436	-0.838377	0.0695016	-0.579348	-1.61116	-0.703282	0.431544	0.94796	0.178544	-1.01449	0.263795	-1.13479	-1.53384	-0.255554	-1.65414	0.343698	0.604755	0.302598	-0.343175	0.122008	-0.607651	-0.760192	-0.295009	-1.02467	B cell receptor signaling pathway;Chagas disease (American trypanosomiasis);Colorectal cancer;Epithelial cell signaling in Helicobacter pylori infection;ErbB signaling pathway;Focal adhesion;GnRH signaling pathway;Leishmaniasis;MAPK signaling pathway;Neurotrophin signaling pathway;Osteoclast differentiation;Pathways in cancer;Renal cell carcinoma;Rheumatoid arthritis;T cell receptor signaling pat…	ko04010;ko04012;ko04310;ko04380;ko04510;ko04620;ko04660;ko04662;ko04722;ko04912;ko05120;ko05140;ko05142;ko05200;ko05210;ko05211;ko05323	P05412	Transcription factor AP-1 OS=Homo sapiens GN=JUN PE=1 SV=2
-0.159066	0.0138379	0.0563984	-0.0796143	0.0124222	-0.0109337	-0.0500044	0.0420321	0.0186762	-0.174586	0.100965	-0.140977	-0.163136	-0.053427	-0.266282	-0.0916033	0.0181057	-0.194749	-0.37834	-0.145807	-0.462064	-0.431527	-0.26494	-0.430463	-0.10279	0.063797	-0.101726	Cytosolic DNA-sensing pathway;Purine metabolism;Pyrimidine metabolism;RNA polymerase	ko00230;ko00240;ko03020;ko04623	P05423	DNA-directed RNA polymerase III subunit RPC4 OS=Homo sapiens GN=POLR3D PE=1 SV=2
0.0299353	0.0300309	-0.0109079	0.153643	0.101629	0.175115	0.13729	0.0852762	0.158762	-0.153755	-0.189068	-0.123631	-0.0132125	0.0501336	0.066509	0.142272	0.205618	0.221994	-0.123142	-0.00925603	-0.0483305	0.046153	0.0396197	0.0533309	0.106396	0.0998625	0.113574	Systemic lupus erythematosus	ko05322	P05455	Lupus La protein OS=Homo sapiens GN=SSB PE=1 SV=2
0.0280876	-0.0701552	-0.0107924	0.364217	0.346159	0.367086	0.381837	0.363779	0.384706	-0.0589182	0.00564704	0.0310035	0.332064	0.228756	0.254331	0.339487	0.236179	0.261754	-0.0142681	-0.0222121	-0.0500614	0.32813	0.288825	0.316317	0.356977	0.317672	0.345164	Arrhythmogenic right ventricular cardiomyopathy (ARVC);Axon guidance;Bacterial invasion of epithelial cells;Cell adhesion molecules (CAMs);Dilated cardiomyopathy;ECM-receptor interaction;Focal adhesion;Hypertrophic cardiomyopathy (HCM);Leishmaniasis;Leukocyte transendothelial migration;Pathogenic Escherichia coli infection;Pathways in cancer;Phagosome;Regulation of actin cytoskeleton;Shigellosis;…	ko04145;ko04360;ko04510;ko04512;ko04514;ko04670;ko04810;ko05100;ko05130;ko05131;ko05140;ko05145;ko05200;ko05222;ko05410;ko05412;ko05414	P05556	Integrin beta-1 OS=Homo sapiens GN=ITGB1 PE=1 SV=2
-0.0322394	0.046554	-0.0695702	-0.149819	-0.110242	-0.139743	-0.1314	-0.0918235	-0.121324	-0.00199631	-0.0791463	-0.0437888	-0.0650521	-0.117867	-0.0728959	-0.0234083	-0.0762232	-0.0312521	-0.0252155	0.0230164	-0.0676467	-0.307673	-0.246837	-0.291659	-0.284391	-0.223555	-0.268377			P05783	Keratin, type I cytoskeletal 18 OS=Homo sapiens GN=KRT18 PE=1 SV=2
0.0233639	-0.0147549	0.0589092	-0.123597	-0.129369	-0.125028	-0.146103	-0.151875	-0.147534	0.0267539	-0.035091	0.011233	-0.127722	-0.18202	-0.028982	-0.128687	-0.182985	-0.0299473	0.1054	0.189945	0.15715	-0.19063	-0.10147	-0.0780815	-0.341462	-0.252302	-0.228913			P05787	Keratin, type II cytoskeletal 8 OS=Homo sapiens GN=KRT8 PE=1 SV=7
0.359204	0.104787	0.17337	0.185449	-0.174851	-0.256709	-0.0270047	-0.387305	-0.469163	0.199967	0.291436	-0.0307901	0.266463	0.184724	0.0751782	0.112925	0.0311864	-0.0783594	0.0104366	0.179786	0.134159	-0.0953498	0.328042	-0.137181	-0.203477	0.219915	-0.245308			P05981	Serine protease hepsin OS=Homo sapiens GN=HPN PE=1 SV=1
0.198997	0.21311	0.236089	0.0115306	-0.00693668	0.0531475	-0.204535	-0.223002	-0.162918	0.288161	0.0677539	0.0459285	0.287569	0.00369158	0.0842203	0.153621	-0.130256	-0.0497275	0.204085	0.261727	0.210021	0.158819	0.174621	0.19764	-0.0664587	-0.0506567	-0.0276377	Porphyrin and chlorophyll metabolism	ko00860	P06132	Uroporphyrinogen decarboxylase OS=Homo sapiens GN=UROD PE=1 SV=2
-0.775426	-1.49467	-0.841817	-0.94241	-0.720212	-0.335253	0.0948943	0.317092	0.702051	-0.215791	-0.239496	-0.699155	0.0499708	0.09013	-0.258559	0.434785	0.474944	0.126255	-0.359547	0.0145411	-0.224773	-0.215878	0.690325	-0.143998	-0.0259517	0.880251	0.0459283	Adherens junction;Aldosterone-regulated sodium reabsorption;Insulin signaling pathway;Type II diabetes mellitus	ko04520;ko04910;ko04930;ko04960	P06213	Insulin receptor OS=Homo sapiens GN=INSR PE=1 SV=4
-0.408022	-0.240485	-0.313376	-0.528795	-0.391962	-0.32392	-0.208167	-0.0713343	-0.00329233	-0.197863	-0.230973	-0.145244	-0.525117	-0.522743	-0.425697	-0.333757	-0.331383	-0.234337	-0.149502	0.0791686	0.0408725	-0.376617	-0.33292	-0.312019	-0.366797	-0.3231	-0.302199			P06276	Cholinesterase OS=Homo sapiens GN=BCHE PE=1 SV=1
-0.0691251	-0.0762255	-0.12411	-0.085068	-0.139286	-0.215793	0.0047522	-0.0494658	-0.125973	-0.115502	-0.240099	-0.187605	-0.367342	-0.472056	-0.320756	-0.186273	-0.290987	-0.139687	0.127222	0.155034	0.147318	-0.135878	-0.163247	-0.141263	-0.279069	-0.306438	-0.284454	Galactose metabolism;Glycerolipid metabolism;Glycosphingolipid biosynthesis - globo series;Lysosome;Sphingolipid metabolism	ko00052;ko00561;ko00600;ko00603;ko04142	P06280	Alpha-galactosidase A OS=Homo sapiens GN=GLA PE=1 SV=1
0.204295	0.271466	0.27866	0.307096	0.372954	0.421976	0.0556223	0.12148	0.170502	0.158812	0.150817	0.169516	0.175352	0.20744	0.181488	0.015637	0.047725	0.021773	0.129171	0.182416	0.110382	0.253021	0.17794	0.113526	0.112365	0.0372837	-0.0271303	Fc gamma R-mediated phagocytosis;Regulation of actin cytoskeleton	ko04666;ko04810	P06396	Gelsolin OS=Homo sapiens GN=GSN PE=1 SV=1
-0.524495	-0.442969	-0.550788	-0.743983	-0.970795	-0.689751	-0.237899	-0.464711	-0.183667	-0.174894	-0.0815312	-0.122547	-0.83535	-0.668284	-0.932567	-0.709026	-0.54196	-0.806243	-0.168007	-0.22102	-0.170691	-0.821002	-0.939231	-0.966721	-0.634429	-0.752658	-0.780148	Bladder cancer;Cell cycle;Chronic myeloid leukemia;Glioma;Melanoma;Non-small cell lung cancer;Pancreatic cancer;Pathways in cancer;Prostate cancer;Small cell lung cancer	ko04110;ko05200;ko05212;ko05214;ko05215;ko05218;ko05219;ko05220;ko05222;ko05223	P06400	Retinoblastoma-associated protein OS=Homo sapiens GN=RB1 PE=1 SV=2
-0.657027	-0.858316	-0.678603	-0.0480087	-0.100928	0.0281761	0.683307	0.630387	0.759491	-0.157948	-0.0654971	-0.303809	-0.316471	-0.253194	-0.282102	-0.14072	-0.0774426	-0.106351	-0.169817	-0.106991	-0.00443941	-0.400033	-0.412983	-0.289763	-0.306284	-0.319234	-0.196014			P06454	Prothymosin alpha OS=Homo sapiens GN=PTMA PE=1 SV=2
-0.235773	-0.233388	-0.376392	-0.344952	-0.318732	-0.383988	-0.063101	-0.036881	-0.102137	-0.0203765	-0.0596587	0.0404155	-0.469898	-0.559121	-0.503049	-0.456691	-0.545914	-0.489842	-0.083676	0.131991	-0.104119	-0.435473	-0.255651	-0.31095	-0.416872	-0.23705	-0.292349	Cell cycle;Gap junction;Oocyte meiosis;p53 signaling pathway;Progesterone-mediated oocyte maturation	ko04110;ko04114;ko04115;ko04540;ko04914	P06493	Cyclin-dependent kinase 1 OS=Homo sapiens GN=CDK1 PE=1 SV=3
0.037842	0.0430822	0.147503	0.201386	0.145253	0.248592	0.125244	0.0691106	0.17245	0.0493411	-0.0107957	-0.0535692	-0.0355558	-0.0969485	-0.165848	-0.0305479	-0.0919406	-0.16084	-0.0740032	-0.165506	-0.0592779	-0.0159929	-0.0108596	0.0500984	0.0836028	0.0887361	0.149694	Alzheimer's disease;Huntington's disease;Oxidative phosphorylation;Parkinson's disease	ko00190;ko05010;ko05012;ko05016	P06576	ATP synthase subunit beta, mitochondrial OS=Homo sapiens GN=ATP5B PE=1 SV=3
-0.120681	-0.0325558	-0.0723104	-0.0739606	0.000382762	-0.00366224	0.0012218	0.0755652	0.0715202	-0.0513847	-0.116636	0.124721	-0.127183	-0.232967	0.00997491	-0.11275	-0.218534	0.0244081	0.0758517	0.0271532	0.132379	0.184324	0.0289575	0.293193	0.105863	-0.0495038	0.214732	Insulin signaling pathway;mTOR signaling pathway;RNA transport	ko03013;ko04150;ko04910	P06730	Eukaryotic translation initiation factor 4E OS=Homo sapiens GN=EIF4E PE=1 SV=2
0.158186	0.0539201	0.127473	0.0622326	-0.124089	0.0508567	-0.0509604	-0.237282	-0.0623363	0.142801	0.013521	0.0541382	-0.0908089	-0.13247	-0.095455	-0.160962	-0.202623	-0.165608	0.162819	0.170885	0.14077	-0.107656	-0.000283906	0.0229189	-0.265814	-0.158442	-0.135239	Glycolysis / Gluconeogenesis;Methane metabolism;RNA degradation	ko00010;ko00680;ko03018	P06733	Alpha-enolase OS=Homo sapiens GN=ENO1 PE=1 SV=2
0.0459661	-0.126929	-0.0414917	0.0845602	-0.0200086	0.0942918	0.125378	0.0208096	0.13511	0.0628289	0.0949773	-0.00668848	0.17471	0.401133	0.0912856	0.124337	0.35076	0.040913	-0.408638	0.0243274	-0.495775	-0.0640939	0.200497	0.0990785	0.229268	0.493859	0.39244	Insulin signaling pathway;Starch and sucrose metabolism	ko00500;ko04910	P06737	Glycogen phosphorylase, liver form OS=Homo sapiens GN=PYGL PE=1 SV=4
0.156147	0.184239	0.0785851	0.138121	0.0933886	-0.0056225	-0.00153603	-0.0462684	-0.14528	0.0376862	0.0134958	0.0527298	0.0993387	0.0608965	0.0805649	0.0647014	0.0262592	0.0459276	0.160863	0.131073	0.173521	0.0312058	-0.0189288	0.00281449	-0.123947	-0.174081	-0.152338	Amino sugar and nucleotide sugar metabolism;Glycolysis / Gluconeogenesis;Pentose phosphate pathway;Starch and sucrose metabolism	ko00010;ko00030;ko00500;ko00520	P06744	Glucose-6-phosphate isomerase OS=Homo sapiens GN=GPI PE=1 SV=4
-0.246394	-0.352793	-0.221932	-0.146239	-0.273161	-0.277287	0.127467	0.000545333	-0.00358067	0.00686791	-0.150355	-0.0805336	-0.28081	-0.376488	-0.157071	-0.206136	-0.301814	-0.0823974	-0.169702	0.0192433	-0.00257143	-0.559975	-0.425271	-0.443531	-0.508965	-0.374261	-0.392521	Base excision repair	ko03410	P06746	DNA polymerase beta OS=Homo sapiens GN=POLB PE=1 SV=3
0.0947933	0.290574	0.123112	0.12087	0.0836729	0.15288	-0.0486231	-0.0858202	-0.0166131	-0.0662844	0.042529	0.168423	-0.0737421	0.142994	0.0343192	-0.121965	0.0947715	-0.0139033	-0.0275191	-0.163793	-0.0704907	-0.0841523	-0.180556	0.0602697	0.0031153	-0.0932884	0.147537			P06748	Nucleophosmin OS=Homo sapiens GN=NPM1 PE=1 SV=2
0.252325	0.0466645	0.243358	0.0956521	0.0979441	0.247996	-0.0851304	-0.0828384	0.0672135	0.00849494	-0.28392	-0.0688061	0.134605	-0.262157	-0.130076	0.249349	-0.147413	-0.0153323	-0.171742	0.330288	-0.194122	-0.170597	-0.284317	-0.386039	-0.158738	-0.272458	-0.37418	Cardiac muscle contraction;Dilated cardiomyopathy;Hypertrophic cardiomyopathy (HCM);Pathways in cancer;Thyroid cancer	ko04260;ko05200;ko05216;ko05410;ko05414	P06753	Tropomyosin alpha-3 chain OS=Homo sapiens GN=TPM3 PE=1 SV=2
-0.208607	-0.17173	-0.230465	-0.0236564	-0.00034032	-0.0495736	0.179944	0.20326	0.154027	-0.176427	-0.0548894	-0.0292761	0.0923588	0.201685	0.0807104	0.179223	0.288549	0.167575	-0.174234	-0.269083	-0.33955	0.126722	0.00666393	-0.160029	0.387678	0.26762	0.100927	Arrhythmogenic right ventricular cardiomyopathy (ARVC);Cell adhesion molecules (CAMs);Dilated cardiomyopathy;ECM-receptor interaction;Focal adhesion;Hypertrophic cardiomyopathy (HCM);Pathways in cancer;Phagosome;Regulation of actin cytoskeleton;Small cell lung cancer	ko04145;ko04510;ko04512;ko04514;ko04810;ko05200;ko05222;ko05410;ko05412;ko05414	P06756	Integrin alpha-V OS=Homo sapiens GN=ITGAV PE=1 SV=2
0.00557856	-0.0184141	-0.0229408	0.00822133	0.0511596	-0.047253	0.0201468	0.063085	-0.0353276	-0.0899238	0.126267	0.0768722	0.00761577	0.200705	0.183489	-0.0301227	0.162967	0.145751	0.0733809	0.113971	0.043039	0.187115	0.200074	0.269338	0.110318	0.123277	0.192541	Amino sugar and nucleotide sugar metabolism;Glycosaminoglycan degradation;Glycosphingolipid biosynthesis - ganglio series;Glycosphingolipid biosynthesis - globo series;Lysosome;Other glycan degradation	ko00511;ko00520;ko00531;ko00603;ko00604;ko04142	P06865	Beta-hexosaminidase subunit alpha OS=Homo sapiens GN=HEXA PE=1 SV=2
-0.155816	-0.117738	-0.129631	0.115967	0.264579	0.245815	0.250362	0.398974	0.38021	-0.0369531	-0.172881	-0.0774291	0.328559	0.18024	0.294648	0.424313	0.275994	0.390402	-0.0654221	-0.0371788	-0.0271499	0.283077	0.35209	0.224327	0.326327	0.39534	0.267577	Bile secretion;Metabolism of xenobiotics by cytochrome P450	ko00980;ko04976	P07099	Epoxide hydrolase 1 OS=Homo sapiens GN=EPHX1 PE=1 SV=1
-0.0230464	-0.167876	0.0521823	-0.116195	-0.208689	-0.154085	-0.0699483	-0.162442	-0.107838	-0.334493	-0.263042	-0.324781	-0.199825	-0.183054	-0.112447	0.107614	0.124385	0.194992	-0.0690933	-0.0473272	-0.151292	-0.140501	0.00907101	0.0166617	-0.0512635	0.0983085	0.105899	PPAR signaling pathway	ko03320	P07108	Acyl-CoA-binding protein OS=Homo sapiens GN=DBI PE=1 SV=2
-0.105032	-0.126421	-0.106857	-0.164598	-0.0635922	-0.10428	-0.051828	0.0491778	0.00849	0.0325338	-0.127258	-0.0710342	-0.0146508	-0.120354	-0.0206904	0.040602	-0.0651012	0.0345624	-0.0536834	0.0836872	-0.0107701	-0.151936	-0.0649453	-0.165195	-0.158347	-0.0713565	-0.171606	Cysteine and methionine metabolism;Glycolysis / Gluconeogenesis;Propanoate metabolism;Pyruvate metabolism	ko00010;ko00270;ko00620;ko00640	P07195	L-lactate dehydrogenase B chain OS=Homo sapiens GN=LDHB PE=1 SV=2
0.0116084	-0.171573	-0.0884846	-0.0696492	-0.17624	-0.0152481	0.0131672	-0.0934236	0.0675683	0.0225703	0.0475409	0.0969121	0.0668635	0.189336	0.330212	0.0111891	0.133662	0.274538	0.0658432	0.171264	0.0315338	0.0307263	0.206875	0.118765	-0.0588207	0.117328	0.029218			P07199	Major centromere autoantigen B OS=Homo sapiens GN=CENPB PE=1 SV=2
0.602033	0.707324	0.51202	1.11434	1.16549	1.02394	0.507214	0.558364	0.416814	0.55422	0.456518	0.488159	0.816624	0.618784	0.636992	0.316992	0.119152	0.13736	0.272139	0.123888	0.280188	0.472312	0.54112	0.593091	0.246907	0.315715	0.367686	Arachidonic acid metabolism;Glutathione metabolism	ko00480;ko00590	P07203	Glutathione peroxidase 1 OS=Homo sapiens GN=GPX1 PE=1 SV=4
-0.284432	0.378403	0.118497	-0.436349	0.37523	0.392243	-0.507172	0.304407	0.32142	0.00267576	0.303249	0.399465	-0.213742	0.438863	0.0330876	-0.448872	0.203733	-0.202042	0.505076	0.569852	0.333549	0.580349	0.306197	0.361295	0.110857	-0.163295	-0.108197	Carbon fixation in photosynthetic organisms;Glycolysis / Gluconeogenesis	ko00010;ko00710	P07205	Phosphoglycerate kinase 2 OS=Homo sapiens GN=PGK2 PE=1 SV=3
-0.0281311	-0.037127	-0.0395874	0.0372912	-0.0595485	-0.0745934	0.0722397	-0.0246	-0.0396449	-0.0368436	-0.0468201	0.0194392	0.0329855	-0.0835573	0.0297896	0.0543937	-0.0621491	0.0511978	0.0533257	0.0277558	0.196409	0.0845311	-0.00533602	0.0983315	-0.00796573	-0.0978329	0.00583467	Protein processing in endoplasmic reticulum	ko04141	P07237	Protein disulfide-isomerase OS=Homo sapiens GN=P4HB PE=1 SV=3
-0.475208	-0.471348	-0.470751	-0.81927	-0.870457	-0.854529	-0.346834	-0.398021	-0.382093	-0.155334	-0.110974	-0.165564	-0.447014	-0.494925	-0.577837	-0.303057	-0.350968	-0.43388	0.223705	0.346417	0.295811	-0.0615544	-0.0335103	0.0727573	-0.350199	-0.322155	-0.215887	Pathways in cancer;Prostate cancer	ko05200;ko05215	P07288	Prostate-specific antigen OS=Homo sapiens GN=KLK3 PE=1 SV=2
0.180427	0.483003	-0.0107515	0.442413	0.477966	0.282924	0.224854	0.260406	0.0653645	0.340785	0.199589	0.152529	0.585484	0.769666	0.714028	0.354516	0.538698	0.48306	0.0229344	-0.0413785	0.33035	0.528532	0.516139	0.671825	0.424563	0.41217	0.567856			P07305	Histone H1.0 OS=Homo sapiens GN=H1F0 PE=1 SV=3
-0.223531	-0.19727	-0.0889693	-0.296362	-0.189473	-0.0162432	-0.126439	-0.0195496	0.15368	-0.217691	-0.223298	0.0655911	-0.46685	-0.378968	-0.224404	-0.341717	-0.253835	-0.0992714	-0.107039	-0.0069677	0.0343904	-0.377352	-0.235584	-0.172276	-0.350813	-0.209045	-0.145737	Aminobenzoate degradation;Pyruvate metabolism	ko00620;ko00627	P07311	Acylphosphatase-1 OS=Homo sapiens GN=ACYP1 PE=1 SV=2
0.00709204	-0.0364144	-0.0829224	0.121572	0.0505846	0.0549244	0.158987	0.0879995	0.0923393	0.0643152	-0.0271607	0.0117253	-0.0224676	-0.128895	0.113862	-0.0387609	-0.145188	0.0975687	0.0819314	-0.0181245	0.0606397	0.256138	0.36158	0.372385	0.214656	0.320098	0.330903	ko05152;Lysosome	ko04142;ko05152	P07339	Cathepsin D OS=Homo sapiens GN=CTSD PE=1 SV=1
-0.0861345	0.0105998	0.0111385	0.054132	0.149441	0.12317	0.0755974	0.170906	0.144635	-0.148636	0.113959	-0.0559324	-0.0236594	0.146625	0.0188424	0.00654373	0.176828	0.0490455	0.0125557	0.0559942	-0.00647435	0.159417	0.141023	0.14775	0.138725	0.120331	0.127058	Alzheimer's disease;Apoptosis;Protein processing in endoplasmic reticulum	ko04141;ko04210;ko05010	P07384	Calpain-1 catalytic subunit OS=Homo sapiens GN=CAPN1 PE=1 SV=1
-0.0785127	-0.188895	-0.187183	-0.138058	-0.303991	-0.206638	0.0134722	-0.152461	-0.0551078	-0.192317	0.0279032	-0.297061	-0.239675	-0.09735	-0.316173	-0.0858501	0.0564749	-0.162348	0.130152	-0.207051	-0.056188	-0.021895	-0.372903	-0.0276946	0.0224673	-0.328541	0.0166677	Gap junction;Pathogenic Escherichia coli infection;Phagosome	ko04145;ko04540;ko05130	P07437	Tubulin beta chain OS=Homo sapiens GN=TUBB PE=1 SV=2
0.387054	0.142339	0.232736	0.276602	-0.112423	0.191088	0.022559	-0.366466	-0.062955	0.425859	0.245784	0.218834	0.2099	-0.00393122	0.257687	-0.0869257	-0.300757	-0.0391387	0.349823	0.302647	0.398775	0.393941	0.441135	0.314834	0.043526	0.09072	-0.035581	Lysosome	ko04142	P07602	Prosaposin OS=Homo sapiens GN=PSAP PE=1 SV=2
0.00591586	0.0424047	0.0112225	-0.0190148	0.0789443	0.0296484	-0.0388625	0.0590966	0.00980071	0.0165602	-0.0880557	-0.0124513	-0.0786435	-0.168773	0.0385754	-0.0506612	-0.140791	0.0665577	-0.0809506	0.0605271	0.0300999	-0.0565952	-0.0199923	-0.0546299	-0.0598207	-0.0232178	-0.0578554	Amino sugar and nucleotide sugar metabolism;Glycosaminoglycan degradation;Glycosphingolipid biosynthesis - ganglio series;Glycosphingolipid biosynthesis - globo series;Lysosome;Other glycan degradation	ko00511;ko00520;ko00531;ko00603;ko00604;ko04142	P07686	Beta-hexosaminidase subunit beta OS=Homo sapiens GN=HEXB PE=1 SV=3
0.122296	0.0593657	-0.231537	-0.0684302	-0.0906285	-0.0022754	-0.0518051	-0.0740034	0.0143497	0.012469	0.0186816	0.0844325	0.291251	0.195735	0.244169	0.252723	0.157207	0.205641	0.0376319	-0.088968	-0.0163228	0.119865	0.27724	0.254542	0.142418	0.299793	0.277095	Antigen processing and presentation;Lysosome;Phagosome;Rheumatoid arthritis	ko04142;ko04145;ko04612;ko05323	P07711	Cathepsin L1 OS=Homo sapiens GN=CTSL PE=1 SV=2
-0.145703	-0.0894404	-0.178373	-0.198964	-0.0957863	-0.18915	-0.0611252	0.0420525	-0.0513112	-0.164337	-0.0522559	-0.11752	-0.143881	0.216632	-0.0226976	-0.03251	0.328003	0.0886734	-0.0227029	-0.00910483	0.0390163	-0.131563	-0.187525	-0.114254	-0.133966	-0.189928	-0.116657	Regulation of actin cytoskeleton;Shigellosis	ko04810;ko05131	P07737	Profilin-1 OS=Homo sapiens GN=PFN1 PE=1 SV=2
0.0547267	-0.0239094	0.288168	1.79193	1.90706	2.24264	1.6856	1.80073	2.13631	0.273362	0.378099	0.306487	0.426304	0.565916	0.432909	0.106988	0.2466	0.113593	0.118361	0.378226	-0.0741787	0.152948	0.159413	-0.200029	0.0121452	0.0186102	-0.340832	Glycolysis / Gluconeogenesis	ko00010	P07738	Bisphosphoglycerate mutase OS=Homo sapiens GN=BPGM PE=1 SV=2
0.0621692	-0.032783	-0.0446569	0.0595505	-0.0661085	-0.0967614	0.0646407	-0.0610183	-0.0916712	0.0312483	-0.0245268	-0.0527937	0.116011	0.121942	-0.0543696	0.131368	0.137299	-0.0390122	0.119549	0.0171827	-0.0830256	0.233977	0.0718847	0.0122219	0.216075	0.0539827	-0.00568013	Purine metabolism	ko00230	P07741	Adenine phosphoribosyltransferase OS=Homo sapiens GN=APRT PE=1 SV=2
0.18173	0.20346	0.174299	0.305869	0.259399	0.2918	0.119373	0.0729027	0.105304	0.116139	0.105761	0.118895	0.278211	0.312339	0.321539	0.164613	0.198741	0.207941	0.152615	0.181125	0.150435	0.265587	0.307644	0.291975	0.104195	0.146252	0.130583	Aminoacyl-tRNA biosynthesis;Porphyrin and chlorophyll metabolism	ko00860;ko00970	P07814	Bifunctional glutamate/proline--tRNA ligase OS=Homo sapiens GN=EPRS PE=1 SV=5
-0.185903	0.0771138	0.0511849	-0.0623999	0.0892784	0.102972	-0.0431985	0.10848	0.122173	0.142506	-0.000903394	0.0568642	0.130966	0.0895854	0.0219488	0.0648104	0.0234298	-0.0442068	0.0287923	0.163814	0.072277	-0.0570352	0.00927612	-0.0773635	-0.14533	-0.0790183	-0.165658	Antigen processing and presentation;Lysosome	ko04142;ko04612	P07858	Cathepsin B OS=Homo sapiens GN=CTSB PE=1 SV=3
0.0750009	-0.0157631	0.0193312	-0.190825	-0.195636	-0.203313	-0.217015	-0.221826	-0.229503	-0.0638451	-0.118346	-0.104422	-0.34781	-0.40626	-0.415238	-0.252272	-0.310722	-0.3197	0.138482	0.0853851	0.073847	-0.383074	-0.464319	-0.45382	-0.482312	-0.563557	-0.553058	Antigen processing and presentation;NOD-like receptor signaling pathway;Pathways in cancer;Plant-pathogen interaction;Progesterone-mediated oocyte maturation;Prostate cancer;Protein processing in endoplasmic reticulum	ko04141;ko04612;ko04621;ko04626;ko04914;ko05200;ko05215	P07900	Heat shock protein HSP 90-alpha OS=Homo sapiens GN=HSP90AA1 PE=1 SV=5
-0.211958	-0.353234	-0.288506	-0.209598	-0.32094	-0.334745	0.074968	-0.036374	-0.050179	0.36278	0.379718	0.284187	0.451949	0.457937	0.115214	0.109721	0.115709	-0.227014	0.101558	0.119716	0.0964423	0.131387	0.203732	0.290119	0.0254816	0.0978266	0.184214	Amino sugar and nucleotide sugar metabolism;Galactose metabolism	ko00052;ko00520	P07902	Galactose-1-phosphate uridylyltransferase OS=Homo sapiens GN=GALT PE=1 SV=3
0.0180252	6.09434e-05	0.00118095	-0.0293069	-0.0475196	-0.0459029	-0.0357293	-0.053942	-0.0523253	-0.0132618	-0.0493064	-0.00292821	-0.203799	-0.071715	-0.0593284	-0.181967	-0.0498829	-0.0374963	-0.0350645	0.0235323	0.0235716	-0.2051	-0.1475	-0.204609	-0.209113	-0.151513	-0.208622	Spliceosome	ko03040	P07910	Heterogeneous nuclear ribonucleoproteins C1/C2 OS=Homo sapiens GN=HNRNPC PE=1 SV=4
-0.141706	0.105732	0.0456776	-0.0173723	0.188791	0.0824898	-0.0206068	0.185556	0.0792553	0.0815132	-0.0657208	0.245404	-0.0112834	-0.134802	0.191058	-0.0983489	-0.221867	0.103993	0.0501513	-0.0080397	0.00048682	0.160111	0.167167	0.0791269	0.145912	0.152968	0.0649274	Alzheimer's disease;Cardiac muscle contraction;Huntington's disease;Oxidative phosphorylation;Parkinson's disease	ko00190;ko04260;ko05010;ko05012;ko05016	P07919	Cytochrome b-c1 complex subunit 6, mitochondrial OS=Homo sapiens GN=UQCRH PE=1 SV=2
-0.26344	-0.286176	-0.222115	-0.569662	-0.556807	-0.490765	-0.312418	-0.299563	-0.233521	0.01251	-0.0448065	-0.198912	-0.285276	-0.512528	-0.571623	-0.208206	-0.435458	-0.494553	-0.0144304	-0.161989	0.0438097	-0.585743	-0.563526	-0.511642	-0.54154	-0.519323	-0.467439	Adherens junction;Tight junction	ko04520;ko04530	P07947	Tyrosine-protein kinase Yes OS=Homo sapiens GN=YES1 PE=1 SV=3
-0.000661659	-0.110094	-0.173888	0.109807	-0.0603142	-0.00714717	0.204688	0.034567	0.087734	0.199409	-0.0599164	-0.17567	0.18533	0.0591043	0.047484	0.197389	0.0711634	0.0595431	-0.370028	-0.148062	-0.00334334	-0.228838	0.0941432	0.0463804	-0.0550269	0.267954	0.220192	B cell receptor signaling pathway;Chemokine signaling pathway;Epithelial cell signaling in Helicobacter pylori infection;Fc epsilon RI signaling pathway;Fc gamma R-mediated phagocytosis;Long-term depression	ko04062;ko04662;ko04664;ko04666;ko04730;ko05120	P07948	Tyrosine-protein kinase Lyn OS=Homo sapiens GN=LYN PE=1 SV=3
-0.116137	-0.0363248	-0.0880112	0.207268	0.207222	0.15026	0.287426	0.28738	0.230418	0.0793754	-0.000675104	0.0501943	-0.129401	-0.0982355	-0.0216596	-0.172366	-0.1412	-0.0646245	-0.168874	-0.146252	-0.0511293	-0.0469122	0.0505179	0.0814255	0.0751729	0.172603	0.203511	Carbon fixation pathways in prokaryotes;Citrate cycle (TCA cycle);Pathways in cancer;Renal cell carcinoma	ko00020;ko00720;ko05200;ko05211	P07954	Fumarate hydratase, mitochondrial OS=Homo sapiens GN=FH PE=1 SV=3
1.44228	1.24897	0.999728	1.35067	1.1104	0.960952	0.120344	-0.119926	-0.269374	0.895485	0.830026	1.06034	1.08066	1.26537	1.55941	0.152043	0.336753	0.630793	0.352077	1.19066	0.869798	1.32893	1.69878	1.15438	0.524752	0.894602	0.350202	ECM-receptor interaction;Focal adhesion;Malaria;Phagosome;TGF-beta signaling pathway	ko04145;ko04350;ko04510;ko04512;ko05144	P07996	Thrombospondin-1 OS=Homo sapiens GN=THBS1 PE=1 SV=2
-0.109314	0.140821	0.213214	-0.136302	-0.0515917	-0.280582	-0.217876	-0.133165	-0.362156	-0.52003	-0.151612	-0.0769675	-0.617422	-0.236315	-0.0933259	-0.367886	0.0132215	0.156211	-0.101617	-0.0963584	-0.121119	-0.405905	-0.210638	-0.234454	-0.29954	-0.104273	-0.128089	Huntington's disease;TGF-beta signaling pathway	ko04350;ko05016	P08047	Transcription factor Sp1 OS=Homo sapiens GN=SP1 PE=1 SV=3
-0.196376	-0.184872	-0.185072	-0.271245	-0.274115	-0.224456	-0.0824717	-0.0853417	-0.0356827	-0.130159	-0.195698	-0.193586	-0.0777516	-0.142625	-0.143417	0.0953961	0.0305227	0.0297307	-0.0830941	-0.125821	-0.0898453	-0.08632	-0.0485716	-0.110237	0.0132668	0.0510152	-0.0106502			P08133	Annexin A6 OS=Homo sapiens GN=ANXA6 PE=1 SV=3
0.0032013	-0.160122	0.0579848	0.172684	-0.0308402	0.0773689	0.205663	0.00213843	0.110348	0.108264	0.0410433	0.145637	0.185059	0.166379	0.246077	0.0867442	0.0680642	0.147762	-0.0102738	0.185224	0.0614386	0.195002	0.280564	0.120294	0.116206	0.201768	0.0414977			P08134	Rho-related GTP-binding protein RhoC OS=Homo sapiens GN=RHOC PE=1 SV=1
0.398041	0.239627	0.415953	0.426706	0.360337	0.458907	0.075499	0.00913	0.1077	0.483439	0.366657	0.452543	0.0852901	0.161821	0.137558	-0.348923	-0.272392	-0.296655	0.154928	0.229922	0.328912	-0.149732	-0.0912676	-0.128804	-0.387653	-0.329188	-0.366725	Protein digestion and absorption	ko04974	P08195	4F2 cell-surface antigen heavy chain OS=Homo sapiens GN=SLC3A2 PE=1 SV=3
-0.303165	-0.338039	-0.490469	-0.299717	-0.5512	-0.661564	0.0775073	-0.173976	-0.28434	-0.126735	-0.283743	-0.522661	-0.37483	-0.220515	-0.366882	-0.0637837	0.0905313	-0.0558357	0.0626138	0.277623	0.18097	0.0790952	0.123769	-0.0248776	-0.0946404	-0.0499666	-0.198613	Drug metabolism - other enzymes;Flavone and flavonol biosynthesis;Glycosaminoglycan degradation;Lysosome;Pentose and glucuronate interconversions;Porphyrin and chlorophyll metabolism;Starch and sucrose metabolism	ko00040;ko00500;ko00531;ko00860;ko00944;ko00983;ko04142	P08236	Beta-glucuronidase OS=Homo sapiens GN=GUSB PE=1 SV=2
0.018092	0.0183702	0.014468	-0.0410816	-0.0979355	-0.104679	-0.0580583	-0.114912	-0.121656	-0.141887	-0.165973	-0.0976679	0.0174402	-0.0336548	0.0264706	0.152616	0.101521	0.161647	-0.01992	-0.0365355	-0.0358741	0.141721	0.196457	0.0534065	0.172498	0.227234	0.084183	Fructose and mannose metabolism;Galactose metabolism;Glycolysis / Gluconeogenesis;Methane metabolism;Pentose phosphate pathway	ko00010;ko00030;ko00051;ko00052;ko00680	P08237	ATP-dependent 6-phosphofructokinase, muscle type OS=Homo sapiens GN=PFKM PE=1 SV=2
-0.114459	-0.0962696	-0.042424	-0.144078	-0.193584	-0.141549	-0.0596938	-0.1092	-0.0571648	-0.11804	-0.0834288	-0.082382	-0.0261218	-0.13332	-0.0801651	0.0684951	-0.0387031	0.0144518	-0.0412092	-0.00722196	-0.08067	-0.193345	-0.106694	-0.188781	-0.150311	-0.0636603	-0.145747	Antigen processing and presentation;NOD-like receptor signaling pathway;Pathways in cancer;Plant-pathogen interaction;Progesterone-mediated oocyte maturation;Prostate cancer;Protein processing in endoplasmic reticulum	ko04141;ko04612;ko04621;ko04626;ko04914;ko05200;ko05215	P08238	Heat shock protein HSP 90-beta OS=Homo sapiens GN=HSP90AB1 PE=1 SV=4
0.116454	0.12028	0.0220997	0.293565	0.328503	0.202913	0.207287	0.242225	0.116635	0.237345	0.11185	0.108845	0.225824	0.224431	0.172657	0.073144	0.071751	0.019977	0.31313	0.334616	0.268604	0.337697	0.473515	0.360939	0.032247	0.168065	0.055489	Protein export	ko03060	P08240	Signal recognition particle receptor subunit alpha OS=Homo sapiens GN=SRPRA PE=1 SV=2
0.204626	0.359378	0.202577	0.36378	0.41559	0.27923	0.108253	0.160063	0.023703	0.480727	0.386442	0.38644	0.541999	0.419978	0.41092	0.124129	0.00210833	-0.00694967	0.391305	0.312476	0.335342	0.240943	0.189944	0.167254	-0.105431	-0.15643	-0.17912	Alanine, aspartate and glutamate metabolism;Nitrogen metabolism	ko00250;ko00910	P08243	Asparagine synthetase [glutamine-hydrolyzing] OS=Homo sapiens GN=ASNS PE=1 SV=4
0.377078	0.193228	0.266759	0.145937	-0.25152	-0.154244	-0.133085	-0.530542	-0.433266	-0.0308523	0.0579632	-0.136557	0.242642	0.549725	0.318126	0.279124	0.586207	0.354608	-0.150844	-0.0825291	0.0802583	-0.0214696	0.0284812	0.17701	0.0295687	0.0795195	0.228048	Drug metabolism - cytochrome P450;Glutathione metabolism;Metabolism of xenobiotics by cytochrome P450	ko00480;ko00980;ko00982	P08263	Glutathione S-transferase A1 OS=Homo sapiens GN=GSTA1 PE=1 SV=3
-1.90115	0.0667383	-2.60407	-0.462615	-0.235003	-0.647679	1.01688	1.24449	0.831815	-0.344619	-0.513282	-1.55267	0.0364842	0.120919	-1.23576	0.840008	0.924443	-0.432236	0.263918	-0.456901	-0.257048	-0.139019	-0.0472486	0.218514	0.0109913	0.102762	0.368524			P08294	Extracellular superoxide dismutase [Cu-Zn] OS=Homo sapiens GN=SOD3 PE=1 SV=2
0.0274752	0.105376	-0.0596285	0.139152	0.27887	0.107594	0.114744	0.254462	0.0831864	0.176991	0.143946	0.234185	0.185582	0.139691	0.111268	0.000541333	-0.0453497	-0.0737727	-0.0131785	-0.0616183	0.0752264	-0.107135	0.0667712	-0.0602357	-0.107278	0.066628	-0.0603789	Porphyrin and chlorophyll metabolism	ko00860	P08397	Porphobilinogen deaminase OS=Homo sapiens GN=HMBS PE=1 SV=2
-0.169307	-0.154255	-0.0212649	-0.267006	-0.199966	-0.120039	-0.152064	-0.0850237	-0.0050967	-0.191238	-0.144245	-0.139085	-0.0957416	-0.0598845	-0.0606843	0.0624477	0.0983048	0.097505	-0.113326	-0.0881548	-0.0711901	-0.0559426	-0.0515657	0.00579535	0.0349477	0.0393246	0.0966857	Alzheimer's disease;Hematopoietic cell lineage;Protein digestion and absorption;Renin-angiotensin system	ko04614;ko04640;ko04974;ko05010	P08473	Neprilysin OS=Homo sapiens GN=MME PE=1 SV=2
-0.0126536	-0.0773835	-0.00789062	0.212186	0.11322	0.122209	0.244829	0.145863	0.154852	0.0781311	0.115198	0.106029	0.148184	0.256609	0.194666	0.048398	0.156823	0.09488	-0.0587942	-0.0510916	-0.11901	0.332443	0.185499	0.279065	0.408742	0.261798	0.355364	Butanoate metabolism;Citrate cycle (TCA cycle);Glycolysis / Gluconeogenesis;Pyruvate metabolism;Valine, leucine and isoleucine biosynthesis	ko00010;ko00020;ko00290;ko00620;ko00650	P08559	Pyruvate dehydrogenase E1 component subunit alpha, somatic form, mitochondrial OS=Homo sapiens GN=PDHA1 PE=1 SV=3
-0.0454577	-0.0704106	0.040026	0.426198	0.355526	0.385318	0.451479	0.380807	0.410599	-0.458522	-0.393698	-0.27275	-0.339068	-0.420785	-0.233024	0.035922	-0.045795	0.141966	-0.0675746	-0.121449	0.0601648	0.0880208	0.0191946	0.184166	0.130974	0.0621475	0.227119	Alzheimer's disease;Cardiac muscle contraction;Huntington's disease;Oxidative phosphorylation;Parkinson's disease	ko00190;ko04260;ko05010;ko05012;ko05016	P08574	Cytochrome c1, heme protein, mitochondrial OS=Homo sapiens GN=CYC1 PE=1 SV=3
-0.020281	0.0503761	-0.0251441	-0.330747	-0.464107	-0.471304	-0.332397	-0.465757	-0.472954	-0.128813	-0.0371229	0.0252622	-0.430107	-0.339452	-0.383789	-0.383216	-0.292561	-0.336898	-0.138759	-0.160673	-0.285154	-0.711037	-0.673031	-0.798286	-0.516175	-0.478169	-0.603424	Spliceosome	ko03040	P08579	U2 small nuclear ribonucleoprotein B'' OS=Homo sapiens GN=SNRPB2 PE=1 SV=1
-0.116831	0.0205778	0.0779466	-0.00228001	0.0663968	-0.0458591	0.00382219	0.072499	-0.0397569	-0.0861896	0.112139	0.0521626	-0.159387	0.112858	-0.0575388	-0.185424	0.0868207	-0.0835761	0.147049	0.165895	-0.0897325	-0.109346	-0.265299	-0.189141	-0.18375	-0.339703	-0.263545	Spliceosome	ko03040	P08621	U1 small nuclear ribonucleoprotein 70 kDa OS=Homo sapiens GN=SNRNP70 PE=1 SV=2
0.669608	0.588872	0.454564	0.851275	0.850085	0.601883	0.28026	0.27907	0.0308683	0.194297	0.261986	0.0618493	0.349179	0.397018	0.248191	0.176468	0.224307	0.0754802	0.282728	0.370683	0.286723	0.597974	0.576586	0.678853	0.284596	0.263208	0.365475	Arrhythmogenic right ventricular cardiomyopathy (ARVC);Bacterial invasion of epithelial cells;Dilated cardiomyopathy;ECM-receptor interaction;Focal adhesion;Hematopoietic cell lineage;Hypertrophic cardiomyopathy (HCM);Phagosome;Regulation of actin cytoskeleton;Shigellosis	ko04145;ko04510;ko04512;ko04640;ko04810;ko05100;ko05131;ko05410;ko05412;ko05414	P08648	Integrin alpha-5 OS=Homo sapiens GN=ITGA5 PE=1 SV=2
0.158859	0.150582	0.0217078	0.0823497	0.0224685	-0.115177	-0.0280332	-0.0879144	-0.22556	-0.176546	-0.158887	-0.0475724	-0.157176	-0.158336	-0.114176	-0.0295075	-0.0306675	0.0134925	0.022882	-0.191546	-0.205792	-0.243615	-0.159299	-0.298695	-0.118796	-0.0344803	-0.173876			P08651	Nuclear factor 1 C-type OS=Homo sapiens GN=NFIC PE=1 SV=2
-0.779181	-0.812077	-0.903575	-0.866885	-0.908819	-1.26011	-0.035274	-0.077208	-0.428499	-0.537427	-0.783417	-0.776248	-0.705129	-0.750625	-0.906591	-0.00609833	-0.0515943	-0.20756	-0.812662	-0.397458	-0.896493	-0.186632	-0.625511	-0.190488	0.515572	0.0766933	0.511716			P08670	Vimentin OS=Homo sapiens GN=VIM PE=1 SV=4
0.337809	0.261459	0.23207	0.0846926	0.167078	0.117637	-0.19242	-0.110035	-0.159476	0.087438	0.143036	0.289595	0.118573	0.217289	0.400957	-0.0547833	0.0439327	0.227601	0.28934	0.117428	0.0904317	0.0842537	0.255836	0.0473579	-0.0814795	0.0901028	-0.118375	Ribosome	ko03010	P08708	40S ribosomal protein S17 OS=Homo sapiens GN=RPS17 PE=1 SV=2
0.135071	-0.0900618	0.0723202	0.117064	0.269276	0.18015	0.0779542	0.230166	0.14104	-0.014482	0.036588	-0.126345	-0.214992	-0.102239	-0.115227	-0.180246	-0.0674927	-0.0804807	-0.0562105	0.0154628	-0.0517007	-0.0634888	-0.13046	-0.242082	-0.0326727	-0.0996439	-0.211266	Axon guidance;Chagas disease (American trypanosomiasis);Chemokine signaling pathway;Gap junction;Gastric acid secretion;Leukocyte transendothelial migration;Long-term depression;Melanogenesis;Progesterone-mediated oocyte maturation;Tight junction;Toxoplasmosis	ko04062;ko04360;ko04530;ko04540;ko04670;ko04730;ko04914;ko04916;ko04971;ko05142;ko05145	P08754	Guanine nucleotide-binding protein G(k) subunit alpha OS=Homo sapiens GN=GNAI3 PE=1 SV=3
0.124946	-0.0117364	0.0202462	-0.0122663	-0.183221	-0.139925	-0.0567516	-0.227706	-0.18441	-0.106521	-0.0313772	0.0350736	-0.157397	-0.0868899	0.00649508	-0.123122	-0.052615	0.0407699	0.0368528	0.0310482	0.0470169	-0.146319	-0.136408	-0.0606081	-0.184625	-0.174714	-0.0989141			P08758	Annexin A5 OS=Homo sapiens GN=ANXA5 PE=1 SV=2
0.0519086	-0.119966	0.0413586	-0.166114	-0.180884	0.0221953	-0.157214	-0.171984	0.0310949	-0.153084	-0.179333	-0.110236	-0.0386489	-0.120186	-0.103533	0.108902	0.027365	0.044018	-0.0624959	-0.0302577	-0.0594751	-0.127063	-0.15902	-0.192426	-0.0763201	-0.108277	-0.141683	Ribosome	ko03010	P08865	40S ribosomal protein SA OS=Homo sapiens GN=RPSA PE=1 SV=4
-0.278562	-0.138251	-0.228269	0.863658	1.09915	1.00394	1.07869	1.31418	1.21897	-0.00106447	-0.195265	0.056886	1.20568	0.945977	1.17571	1.25216	0.992458	1.22219	0.12786	0.255356	-0.00289642	1.44026	1.43881	1.32691	1.31349	1.31204	1.20014			P08910	Monoacylglycerol lipase ABHD2 OS=Homo sapiens GN=ABHD2 PE=1 SV=1
-0.0857457	0.437746	-0.0410873	0.168214	0.320879	0.0813506	0.0645763	0.217241	-0.0222871	0.707249	0.711579	0.403055	0.464464	0.379758	0.00710628	-0.14283	-0.227536	-0.600188	0.0236566	0.606586	0.270076	-0.206725	0.0210526	-0.149381	-0.506831	-0.279054	-0.449487	Neuroactive ligand-receptor interaction	ko04080	P08913	Alpha-2A adrenergic receptor OS=Homo sapiens GN=ADRA2A PE=1 SV=3
-0.0799501	-0.0211875	0.0672765	-0.00892153	0.0421146	0.0878031	0.0023655	0.0534016	0.0990901	-0.0664416	-0.100011	-0.182624	-0.18714	-0.103311	-0.0549411	-0.0707811	0.0130479	0.0614178	-0.310395	-0.243671	-0.412269	-0.113022	-0.261725	-0.284341	0.20909	0.0603867	0.0377707			P09001	39S ribosomal protein L3, mitochondrial OS=Homo sapiens GN=MRPL3 PE=1 SV=1
0.134478	-0.153689	0.226895	-0.0774311	-0.241911	0.096778	-0.146659	-0.311139	0.02755	0.184366	-0.0165913	-0.0397731	0.190356	-0.191708	-0.112127	0.147689	-0.234375	-0.154794	0.0431854	-0.103811	-0.0518853	-0.0488562	-0.340432	-0.304702	-0.0113526	-0.302928	-0.267198	Spliceosome	ko03040	P09012	U1 small nuclear ribonucleoprotein A OS=Homo sapiens GN=SNRPA PE=1 SV=3
0.0972528	0.178852	0.0201026	0.122238	0.100937	0.161045	0.0235022	0.0022012	0.0623092	0.304461	0.118165	0.150135	0.173181	0.0832928	0.0614432	-0.0177393	-0.107628	-0.129477	0.158694	0.0775291	0.229498	0.0252221	0.0117682	0.124192	-0.130018	-0.143472	-0.0310484	Glycolysis / Gluconeogenesis;Methane metabolism;RNA degradation	ko00010;ko00680;ko03018	P09104	Gamma-enolase OS=Homo sapiens GN=ENO2 PE=1 SV=3
-0.0328442	-0.0928992	1.13618e-05	0.0136452	-0.0846606	0.0325577	0.0555559	-0.0427499	0.0744684	0.150427	0.215046	0.173627	0.202812	0.223298	0.281852	0.023112	0.043598	0.102152	0.261519	0.234986	0.202916	0.369691	0.311981	0.312771	0.136551	0.0788407	0.0796307	Benzoate degradation;Biosynthesis of unsaturated fatty acids;Fatty acid metabolism;Peroxisome;PPAR signaling pathway;Valine, leucine and isoleucine degradation	ko00071;ko00280;ko00362;ko01040;ko03320;ko04146	P09110	3-ketoacyl-CoA thiolase, peroxisomal OS=Homo sapiens GN=ACAA1 PE=1 SV=2
0.226941	0.0385939	-0.210993	0.0221915	-0.304601	-0.365211	0.00401087	-0.322782	-0.383392	-0.0693929	0.059163	-0.177562	0.171495	0.255449	0.107787	0.234092	0.318046	0.170384	0.0410707	-0.110593	0.228238	0.0833161	0.164201	0.312607	0.0304109	0.111296	0.259702	Protein export	ko03060	P09132	Signal recognition particle 19 kDa protein OS=Homo sapiens GN=SRP19 PE=1 SV=3
0.166792	0.0337638	0.0340662	0.157938	-0.00129331	-0.0443126	0.0797307	-0.0795006	-0.12252	0.00142816	-0.264767	-0.106556	0.00218022	-0.198668	0.136195	0.125478	-0.0753697	0.259493	-0.318804	-0.126934	-0.13281	-0.322647	-0.268563	-0.28065	-0.129798	-0.0757137	-0.0878007	Spliceosome	ko03040	P09234	U1 small nuclear ribonucleoprotein C OS=Homo sapiens GN=SNRPC PE=1 SV=1
-0.223647	-0.0284299	-0.231518	0.188723	0.20026	0.108519	0.349921	0.361458	0.269717	0.105793	0.00897737	-0.0274541	-0.0586318	-0.139567	-0.150837	-0.0877372	-0.168672	-0.179942	0.320488	0.345333	0.251159	-0.0170573	-0.00215136	0.0210692	-0.322717	-0.307811	-0.284591	Folate biosynthesis	ko00790	P09417	Dihydropteridine reductase OS=Homo sapiens GN=QDPR PE=1 SV=2
0.116876	0.169262	0.0352127	0.0548824	0.135212	0.062212	-0.0522345	0.0280951	-0.0449049	-0.0820016	-0.0064345	0.0562921	-0.0473947	0.0354561	0.0256263	-0.03668	0.0461708	0.036341	-0.0230572	0.0108358	0.144264	-0.170832	-0.174012	-0.163828	-0.214846	-0.218026	-0.207842	Base excision repair	ko03410	P09429	High mobility group protein B1 OS=Homo sapiens GN=HMGB1 PE=1 SV=3
0.00503843	-0.105012	-0.102161	-0.00955057	-0.298403	-0.108769	0.0578276	-0.231025	-0.0413908	-0.0487124	0.133641	0.325077	0.109457	0.375253	0.534606	-0.0272115	0.238584	0.397937	0.234633	0.297531	0.288597	0.244687	0.219225	0.501783	-0.0289	-0.054362	0.228196	Cardiac muscle contraction;Dilated cardiomyopathy;Hypertrophic cardiomyopathy (HCM)	ko04260;ko05410;ko05414	P09493	Tropomyosin alpha-1 chain OS=Homo sapiens GN=TPM1 PE=1 SV=2
-0.196043	-0.20608	-0.122671	0.0340543	0.270019	0.231507	0.208986	0.44495	0.406438	-0.019234	-0.0281143	-0.00571379	0.037728	0.0152965	0.0296555	0.0554154	0.0329839	0.0473429	0.0444419	0.0124149	-0.222847	0.0329261	0.0430223	-0.275986	0.0882562	0.0983524	-0.220656	Bacterial invasion of epithelial cells;Endocrine and other factor-regulated calcium reabsorption;Endocytosis;Huntington's disease;Lysosome	ko04142;ko04144;ko04961;ko05016;ko05100	P09496	Clathrin light chain A OS=Homo sapiens GN=CLTA PE=1 SV=1
0.207809	0.147324	0.317052	-0.155152	-0.134343	-0.154492	-0.379214	-0.358405	-0.378554	0.117777	-0.0990863	0.0959159	0.108473	-0.0839459	0.0696739	0.0702708	-0.122148	0.0314717	0.0496703	0.118854	0.108609	0.225074	0.101878	0.103247	0.132696	0.00950023	0.0108692	Bacterial invasion of epithelial cells;Endocrine and other factor-regulated calcium reabsorption;Endocytosis;Huntington's disease;Lysosome	ko04142;ko04144;ko04961;ko05016;ko05100	P09497	Clathrin light chain B OS=Homo sapiens GN=CLTB PE=1 SV=1
0.120354	-0.101682	-0.119221	0.0181832	-0.00862226	0.0157985	0.0516995	0.0248941	0.0493148	-0.0509021	-0.0205846	-0.0830907	-0.0108674	-0.106187	0.0260248	0.0406584	-0.0546612	0.0775506	-0.0612172	-0.147553	-0.062482	0.0119769	-0.129824	-0.0578247	0.102394	-0.0394066	0.0325927			P09525	Annexin A4 OS=Homo sapiens GN=ANXA4 PE=1 SV=4
-0.290087	-0.201268	-0.289916	-0.115559	-0.176291	-0.204879	0.144865	0.0841327	0.0555447	-0.0386864	-0.109385	-0.139502	-0.0373535	-0.0392277	-0.117124	0.0585043	0.0566301	-0.0212662	-0.180796	-0.0122086	-0.0639835	0.00206398	0.0804217	0.0197758	0.0877267	0.166084	0.105439			P09543	2',3'-cyclic-nucleotide 3'-phosphodiesterase OS=Homo sapiens GN=CNP PE=1 SV=2
[truncated: 5,656 more rows]

## Sheet: KEGG Ann. PCa
Ctrl 1 (24h)	Ctrl 2 (24h)	Ctrl 3 (24h)	KD 1 (24h)	KD 2 (24h)	KD 3 (24h)	FC KD over Ctrl (24h; 1)	FC KD over Ctrl (24h; 2)	FC KD over Ctrl (24h; 3)	Ctrl 1 (36h)	Ctrl 2 (36h)	Ctrl 3 (36h)	KD 1 (36h)	KD 2 (36h)	KD 3 (36h)	FC KD over Ctrl (36h; 1)	FC KD over Ctrl (36h; 2)	FC KD over Ctrl (36h; 3)	Ctrl 1 (48h)	Ctrl 2 (48h)	Ctrl 3 (48h)	KD 1 (48h)	KD 2 (48h)	KD 3 (48h)	FC KD over Ctrl (48h; 1)	FC KD over Ctrl (48h; 2)	FC KD over Ctrl (48h; 3)	KEGG Pathways	KEGG Pathway Identifiers	Accession	Description
[truncated: 48 more rows]
